# Supplementary material for: Tomato yellow leaf curl virus manipulates Bemisia tabaci, MEAM1 both directly and indirectly through changes in visual and volatile cues
Source: PeerJ. 2024 Jul 23;12:e17665. doi: 10.7717/peerj.17665 (PMC11276755; doi:10.7717/peerj.17665)
Supplement: Supplemental Information 1 [file peerj-12-17665-s001.xlsx]

## Sheet: graphs and analysis
Sum of Responders	Column Labels					Sum of Responders	Column Labels					ColonyStatus.Clean.Hot	ExperimentNumber	Green+UV+ND	NonResponders	Yellow+UV+ND	Total	TotalPercentResponders			PercentRespondersGreen	PercentRespondersYellow				ColonyStatus.Clean.Hot
Row Labels	Green+UV+ND	NonResponders	Yellow+UV+ND	Grand Total		Row Labels	Green+UV+ND	NonResponders	Yellow+UV+ND	Grand Total		Clean	1	12	10	2	24	0.583333	-	-	0.857143	0.142857					Green	Yellow		average	TYLCV-	TYLCV+
1	26	13	9	48			26	13	9	48		Clean	2	5	11	4	20	0.45	-	-	0.555556	0.444444				Clean	0.648726	0.351274		Green Target	0.648726	0.527826
Clean	12	10	2	24	1	Clean	12	10	2	24		Clean	3	1	8	0	9	0.111111	1	0	-	-				Hot	0.527826	0.472174		Yellow Target	0.351274	0.472174
Hot	14	3	7	24	1	Hot	14	3	7	24		Clean	4	2	18	14	34	0.470588	0.125	0.875	-	-
2	21	18	16	55			21	18	16	55		Clean	5	1	3	2	6	0.5	0.333333	0.666667	-	-				standard deviation	Green	Yellow		std deviation	Clean	Hot
Clean	5	11	4	20	2	Clean	5	11	4	20		Clean	6	11	0	11	22	1	-	-	0.5	0.5				Clean	0.112969	0.112969		Green	0.112969	0.124148
Hot	16	7	12	35	2	Hot	16	7	12	35		Clean	7	12	1	2	15	0.933333	-	-	0.857143	0.142857				Hot	0.124148	0.124148		Yellow	0.112969	0.124148
3	16	12	10	38			16	12	10	38		Clean	8	16	10	7	33	0.69697	0.695652	0.304348	-	-
Clean	1	8	0	9	3	Clean	1	8	0	9		Clean	9	17	0	7	24	1	-	-	0.708333	0.291667				counts	Green	Yellow		counts	Clean	Hot
Hot	15	4	10	29	3	Hot	15	4	10	29		Clean	10	17	3	7	27	0.888889	-	-	0.708333	0.291667				Clean	18	18		Green	18	19
4	11	22	22	55			11	22	22	55		Clean	11	16	4	23	43	0.906977	0.410256	0.589744	-	-				Hot	19	19		Yellow	18	19
Clean	2	18	14	34	4	Clean	2	18	14	34		Clean	12	17	4	6	27	0.851852	-	-	0.73913	0.26087
Hot	9	4	8	21	4	Hot	9	4	8	21		Clean	13	20	3	6	29	0.896552	-	-	0.769231	0.230769				standard error	Green	Yellow		standard error	Clean	Hot
5	20	5	10	35			20	5	10	35		Clean	14	25	9	6	40	0.775	0.806452	0.193548	-	-				Clean	0.0266271	0.0266271		Green	0.0266271	0.0284815
Clean	1	3	2	6	5	Clean	1	3	2	6		Clean	15	11	8	9	28	0.714286	-	-	0.55	0.45				Hot	0.0284815	0.0284815		Yellow	0.0266271	0.0284815
Hot	19	2	8	29	5	Hot	19	2	8	29		Clean	16	19	5	8	32	0.84375	0.703704	0.296296	-	-
6	29	5	25	59			29	5	25	59		Clean	17	30	8	11	49	0.836735	0.731707	0.268293	-	-
Clean	11	0	11	22	6	Clean	11	0	11	22		Clean	18	11	7	8	26	0.730769	-	-	0.578947	0.421053			pvalue	3.28194e-05	clean colony T-test				Clean	Hot
Hot	18	5	14	37	6	Hot	18	5	14	37		Clean	19	15	3	11	29	0.896552	-	-	0.576923	0.423077			pvalue	0.341522	hot colony t-test			Green	a	a
7	17	10	10	37			17	10	10	37		Clean	20	7	11	4	22	0.5	-	-	0.636364	0.363636								Yellow	b	a
Clean	12	1	2	15	7	Clean	12	1	2	15		Clean	21	17	5	7	29	0.827586	-	-	0.708333	0.291667				<0.05*	<0.01**	<0.0001***
Hot	5	9	8	22	7	Hot	5	9	8	22		Clean	22	17	1	9	27	0.962963	-	-	0.653846	0.346154
8	21	16	16	53			21	16	16	53		Clean	23	19	8	11	38	0.789474	0.633333	0.366667	-	-					3.28194e-05
Clean	16	10	7	33	8	Clean	16	10	7	33		Clean	24	18	6	11	35	0.828571	0.62069	0.37931	-	-					0.23
Hot	5	6	9	20	8	Hot	5	6	9	20		Clean	25	12	4	12	28	0.857143	-	-	0.5	0.5
9	24	7	16	47			24	7	16	47		Clean	26	13	10	11	34	0.705882	0.541667	0.458333	-	-
Clean	17	0	7	24	9	Clean	17	0	7	24		Clean	27	13	3	13	29	0.896552	-	-	0.5	0.5
Hot	7	7	9	23	9	Hot	7	7	9	23		Clean	28	16	3	8	27	0.888889	-	-	0.666667	0.333333
10	33	13	16	62			33	13	16	62		Clean	29	22	9	12	43	0.790698	0.647059	0.352941	-	-
Clean	17	3	7	27	10	Clean	17	3	7	27		Clean	30	11	6	7	24	0.75	-	-	0.611111	0.388889
Hot	16	10	9	35	10	Hot	16	10	9	35		Hot	1	14	3	7	24	0.875	-	-	0.666667	0.333333
11	24	9	36	69			24	9	36	69		Hot	2	16	7	12	35	0.8	0.571429	0.428571	-	-
Clean	16	4	23	43	11	Clean	16	4	23	43		Hot	3	15	4	10	29	0.862069	-	-	0.6	0.4
Hot	8	5	13	26	11	Hot	8	5	13	26		Hot	4	9	4	8	21	0.809524	-	-	0.529412	0.470588
12	25	11	19	55			25	11	19	55		Hot	5	19	2	8	29	0.931034	-	-	0.703704	0.296296
Clean	17	4	6	27	12	Clean	17	4	6	27		Hot	6	18	5	14	37	0.864865	0.5625	0.4375	-	-
Hot	8	7	13	28	12	Hot	8	7	13	28		Hot	7	5	9	8	22	0.590909	-	-	0.384615	0.615385
13	29	8	13	50			29	8	13	50		Hot	8	5	6	9	20	0.7	-	-	0.357143	0.642857
Clean	20	3	6	29	13	Clean	20	3	6	29		Hot	9	7	7	9	23	0.695652	-	-	0.4375	0.5625
Hot	9	5	7	21	13	Hot	9	5	7	21		Hot	10	16	10	9	35	0.714286	-	-	0.64	0.36
14	30	13	13	56			30	13	13	56		Hot	11	8	5	13	26	0.807692	0.380952	0.619048	0.380952	0.619048
Clean	25	9	6	40	14	Clean	25	9	6	40		Hot	12	8	7	13	28	0.75	-	-	0.380952	0.619048
Hot	5	4	7	16	14	Hot	5	4	7	16		Hot	13	9	5	7	21	0.761905	-	-	0.5625	0.4375
15	17	14	19	50			17	14	19	50		Hot	14	5	4	7	16	0.75	0.416667	0.583333	-	-
Clean	11	8	9	28	15	Clean	11	8	9	28		Hot	15	6	6	10	22	0.727273	-	-	0.375	0.625
Hot	6	6	10	22	15	Hot	6	6	10	22		Hot	16	23	6	9	38	0.842105	0.71875	0.28125	-	-
16	42	11	17	70			42	11	17	70		Hot	17	7	4	4	15	0.733333	0.636364	0.363636	-	-
Clean	19	5	8	32	16	Clean	19	5	8	32		Hot	18	10	5	6	21	0.761905	-	-	0.625	0.375
Hot	23	6	9	38	16	Hot	23	6	9	38		Hot	19	12	3	15	30	0.9	-	-	0.444444	0.555556
17	37	12	15	64			37	12	15	64		Hot	20	13	8	5	26	0.692308	-	-	0.722222	0.277778
Clean	30	8	11	49	17	Clean	30	8	11	49		Hot	21	11	9	11	31	0.709677	0.5	0.5	-	-
Hot	7	4	4	15	17	Hot	7	4	4	15		Hot	22	14	5	9	28	0.821429	-	-	0.608696	0.391304
18	21	12	14	47			21	12	14	47		Hot	23	14	4	12	30	0.866667	-	-	0.538462	0.461538
Clean	11	7	8	26	18	Clean	11	7	8	26		Hot	24	13	10	11	34	0.705882	0.541667	0.458333	-	-
Hot	10	5	6	21	18	Hot	10	5	6	21		Hot	25	9	5	12	26	0.807692	-	-	0.428571	0.571429
19	27	6	26	59			27	6	26	59		Hot	26	9	7	5	21	0.666667	-	-	0.642857	0.357143
Clean	15	3	11	29	19	Clean	15	3	11	29
Hot	12	3	15	30	19	Hot	12	3	15	30
20	20	19	9	48			20	19	9	48
Clean	7	11	4	22	20	Clean	7	11	4	22
Hot	13	8	5	26	20	Hot	13	8	5	26
21	28	14	18	60			28	14	18	60
Clean	17	5	7	29	21	Clean	17	5	7	29
Hot	11	9	11	31	21	Hot	11	9	11	31
22	31	6	18	55			31	6	18	55
Clean	17	1	9	27	22	Clean	17	1	9	27
Hot	14	5	9	28	22	Hot	14	5	9	28
23	33	12	23	68			33	12	23	68
Clean	19	8	11	38	23	Clean	19	8	11	38
Hot	14	4	12	30	23	Hot	14	4	12	30
24	31	16	22	69			31	16	22	69
Clean	18	6	11	35	24	Clean	18	6	11	35
Hot	13	10	11	34	24	Hot	13	10	11	34
25	21	9	24	54			21	9	24	54
Clean	12	4	12	28	25	Clean	12	4	12	28
Hot	9	5	12	26	25	Hot	9	5	12	26
26	22	17	16	55			22	17	16	55
Clean	13	10	11	34	26	Clean	13	10	11	34
Hot	9	7	5	21	26	Hot	9	7	5	21
27	13	3	13	29			13	3	13	29
Clean	13	3	13	29	27	Clean	13	3	13	29
28	16	3	8	27			16	3	8	27
Clean	16	3	8	27	28	Clean	16	3	8	27
29	22	9	12	43			22	9	12	43
Clean	22	9	12	43	29	Clean	22	9	12	43
30	11	6	7	24			11	6	7	24
Clean	11	6	7	24	30	Clean	11	6	7	24
Grand Total	718	331	492	1541		Grand Total	718	331	492	1541

## Sheet: raw data
Trial	Date	RandomizationOrder	Temp.F	Temp.C	Lab.RH	TimeStarted	Sex	Color	Responders	ColonyCleanorHot
1	6.28.2023	12	72	22.2222	43	16:00:00	M	Green+UV+ND	6	Clean
2	6.29.2023	12	81	27.2222	38	14:05:00	M	Green+UV+ND	3	Clean
3	7.17.2023	12	77	25	56	14:54:00	M	Green+UV+ND	1	Clean
4	7.17.2023	12	77	25	56	14:54:00	M	Green+UV+ND	2	Clean
5	7.12.2023	12	77	25	56	14:54:00	M	Green+UV+ND	1	Clean
6	7.18.2023	21	73	22.7778	55	14:10:00	M	Green+UV+ND	8	Clean
7	7.18.2023	21	73	22.7778	55	14:10:00	M	Green+UV+ND	10	Clean
8	7.18.2023	21	73	22.7778	55	14:10:00	M	Green+UV+ND	9	Clean
9	7.19.2023	21	73	22.7778	54	12:10:00	M	Green+UV+ND	10	Clean
10	7.19.2023	21	73	22.7778	54	12:10:00	M	Green+UV+ND	12	Clean
11	7.19.2023	21	73	22.7778	54	12:10:00	M	Green+UV+ND	-	Clean
12	7.20.2023	21	73	22.7778	54	11.35 AM	M	Green+UV+ND	8	Clean
13	7.20.2023	21	73	22.7778	54	11.35 AM	M	Green+UV+ND	7	Clean
14	7.20.2023	21	73	22.7778	54	11.35 AM	M	Green+UV+ND	-	Clean
15	7.24.2023	12	75	23.8889	55	10:20:00	M	Green+UV+ND	7	Clean
16	7.24.2023	12	75	23.8889	55	10:20:00	M	Green+UV+ND	8	Clean
17	7.24.2023	12	75	23.8889	55	10:20:00	M	Green+UV+ND	-	Clean
18	7.24.2023	12	75	23.8889	53	13:55:00	M	Green+UV+ND	5	Clean
19	7.24.2023	12	75	23.8889	53	13:55:00	M	Green+UV+ND	6	Clean
20	7.24.2023	12	75	23.8889	53	13:55:00	M	Green+UV+ND	3	Clean
21	7.25.2023	21	73	22.7778	55	11.:21 AM	M	Green+UV+ND	8	Clean
22	7.25.2023	21	73	22.7778	55	11.:21 AM	M	Green+UV+ND	10	Clean
23	7.25.2023	21	73	22.7778	55	11.:21 AM	M	Green+UV+ND	8	Clean
24	7.25.2023	21	75	23.8889	54	14:15:00	M	Green+UV+ND	-	Clean
25	7.25.2023	21	75	23.8889	54	14:15:00	M	Green+UV+ND	6	Clean
26	7.25.2023	21	75	23.8889	54	14:15:00	M	Green+UV+ND	3	Clean
27	7.26.2023	12	72	22.2222	56	10:50:00	M	Green+UV+ND	8	Clean
28	7.26.2023	12	72	22.2222	56	10:50:00	M	Green+UV+ND	7	Clean
29	7.26.2023	12	72	22.2222	56	10:50:00	M	Green+UV+ND	-	Clean
30	7.26.2023	21	73	22.7778	53	13:37:00	M	Green+UV+ND	5	Clean
1	6.28.2023	12	72	22.2222	43	16:00:00	F	Green+UV+ND	6	Clean
2	6.29.2023	12	81	27.2222	38	14:05:00	F	Green+UV+ND	1	Clean
3	7.17.2023	12	77	25	56	14:54:00	F	Green+UV+ND	-	Clean
4	7.17.2023	12	77	25	56	14:54:00	F	Green+UV+ND	-	Clean
5	7.12.2023	12	77	25	56	14:54:00	F	Green+UV+ND	-	Clean
6	7.18.2023	21	73	22.7778	55	14:10:00	F	Green+UV+ND	3	Clean
7	7.18.2023	21	73	22.7778	55	14:10:00	F	Green+UV+ND	2	Clean
8	7.18.2023	21	73	22.7778	55	14:10:00	F	Green+UV+ND	7	Clean
9	7.19.2023	21	73	22.7778	54	12:10:00	F	Green+UV+ND	7	Clean
10	7.19.2023	21	73	22.7778	54	12:10:00	F	Green+UV+ND	5	Clean
11	7.19.2023	21	73	22.7778	54	12:10:00	F	Green+UV+ND	-	Clean
12	7.20.2023	21	73	22.7778	54	11.35 AM	F	Green+UV+ND	7	Clean
13	7.20.2023	21	73	22.7778	54	11.35 AM	F	Green+UV+ND	10	Clean
14	7.20.2023	21	73	22.7778	54	11.35 AM	F	Green+UV+ND	-	Clean
15	7.24.2023	12	75	23.8889	55	10:20:00	F	Green+UV+ND	3	Clean
16	7.24.2023	12	75	23.8889	55	10:20:00	F	Green+UV+ND	10	Clean
17	7.24.2023	12	75	23.8889	55	10:20:00	F	Green+UV+ND	-	Clean
18	7.24.2023	12	75	23.8889	53	13:55:00	F	Green+UV+ND	4	Clean
19	7.24.2023	12	75	23.8889	53	13:55:00	F	Green+UV+ND	8	Clean
20	7.24.2023	12	75	23.8889	53	13:55:00	F	Green+UV+ND	2	Clean
21	7.25.2023	21	73	22.7778	55	11.:21 AM	F	Green+UV+ND	7	Clean
22	7.25.2023	21	73	22.7778	55	11.:21 AM	F	Green+UV+ND	7	Clean
23	7.25.2023	21	73	22.7778	55	11.:21 AM	F	Green+UV+ND	11	Clean
24	7.25.2023	21	75	23.8889	54	14:15:00	F	Green+UV+ND	-	Clean
25	7.25.2023	21	75	23.8889	54	14:15:00	F	Green+UV+ND	4	Clean
26	7.25.2023	21	75	23.8889	54	14:15:00	F	Green+UV+ND	9	Clean
27	7.26.2023	12	72	22.2222	56	10:50:00	F	Green+UV+ND	5	Clean
28	7.26.2023	12	72	22.2222	56	10:50:00	F	Green+UV+ND	9	Clean
29	7.26.2023	12	72	22.2222	56	10:50:00	F	Green+UV+ND	-	Clean
30	7.26.2023	21	73	22.7778	53	13:37:00	F	Green+UV+ND	5	Clean
1	6.28.2023	12	72	22.2222	43	16:00:00	?	Green+UV+ND	-	Clean
2	6.29.2023	12	81	27.2222	38	14:05:00	?	Green+UV+ND	1	Clean
3	7.17.2023	12	77	25	56	14:54:00	?	Green+UV+ND	-	Clean
4	7.17.2023	12	77	25	56	14:54:00	?	Green+UV+ND	-	Clean
5	7.12.2023	12	77	25	56	14:54:00	?	Green+UV+ND	-	Clean
6	7.18.2023	21	73	22.7778	55	14:10:00	?	Green+UV+ND	-	Clean
7	7.18.2023	21	73	22.7778	55	14:10:00	?	Green+UV+ND	-	Clean
8	7.18.2023	21	73	22.7778	55	14:10:00	?	Green+UV+ND	-	Clean
9	7.19.2023	21	73	22.7778	54	12:10:00	?	Green+UV+ND	-	Clean
10	7.19.2023	21	73	22.7778	54	12:10:00	?	Green+UV+ND	-	Clean
11	7.19.2023	21	73	22.7778	54	12:10:00	?	Green+UV+ND	16	Clean
12	7.20.2023	21	73	22.7778	54	11.35 AM	?	Green+UV+ND	2	Clean
13	7.20.2023	21	73	22.7778	54	11.35 AM	?	Green+UV+ND	3	Clean
14	7.20.2023	21	73	22.7778	54	11.35 AM	?	Green+UV+ND	25	Clean
15	7.24.2023	12	75	23.8889	55	10:20:00	?	Green+UV+ND	1	Clean
16	7.24.2023	12	75	23.8889	55	10:20:00	?	Green+UV+ND	1	Clean
17	7.24.2023	12	75	23.8889	55	10:20:00	?	Green+UV+ND	30	Clean
18	7.24.2023	12	75	23.8889	53	13:55:00	?	Green+UV+ND	2	Clean
19	7.24.2023	12	75	23.8889	53	13:55:00	?	Green+UV+ND	1	Clean
20	7.24.2023	12	75	23.8889	53	13:55:00	?	Green+UV+ND	2	Clean
21	7.25.2023	21	73	22.7778	55	11.:21 AM	?	Green+UV+ND	2	Clean
22	7.25.2023	21	73	22.7778	55	11.:21 AM	?	Green+UV+ND	-	Clean
23	7.25.2023	21	73	22.7778	55	11.:21 AM	?	Green+UV+ND	-	Clean
24	7.25.2023	21	75	23.8889	54	14:15:00	?	Green+UV+ND	18	Clean
25	7.25.2023	21	75	23.8889	54	14:15:00	?	Green+UV+ND	2	Clean
26	7.25.2023	21	75	23.8889	54	14:15:00	?	Green+UV+ND	1	Clean
27	7.26.2023	12	72	22.2222	56	10:50:00	?	Green+UV+ND	-	Clean
28	7.26.2023	12	72	22.2222	56	10:50:00	?	Green+UV+ND	-	Clean
29	7.26.2023	12	72	22.2222	56	10:50:00	?	Green+UV+ND	22	Clean
30	7.26.2023	21	73	22.7778	53	13:37:00	?	Green+UV+ND	1	Clean
1	6.28.2023	12	72	22.2222	43	16:00:00	M	Yellow+UV+ND	-	Clean
2	6.29.2023	12	81	27.2222	38	14:05:00	M	Yellow+UV+ND	3	Clean
3	7.17.2023	12	77	25	56	14:54:00	M	Yellow+UV+ND	-	Clean
4	7.17.2023	12	77	25	56	14:54:00	M	Yellow+UV+ND	14	Clean
5	7.12.2023	12	77	25	56	14:54:00	M	Yellow+UV+ND	2	Clean
6	7.18.2023	21	73	22.7778	55	14:10:00	M	Yellow+UV+ND	9	Clean
7	7.18.2023	21	73	22.7778	55	14:10:00	M	Yellow+UV+ND	2	Clean
8	7.18.2023	21	73	22.7778	55	14:10:00	M	Yellow+UV+ND	5	Clean
9	7.19.2023	21	73	22.7778	54	12:10:00	M	Yellow+UV+ND	3	Clean
10	7.19.2023	21	73	22.7778	54	12:10:00	M	Yellow+UV+ND	3	Clean
11	7.19.2023	21	73	22.7778	54	12:10:00	M	Yellow+UV+ND	-	Clean
12	7.20.2023	21	73	22.7778	54	11.35 AM	M	Yellow+UV+ND	2	Clean
13	7.20.2023	21	73	22.7778	54	11.35 AM	M	Yellow+UV+ND	5	Clean
14	7.20.2023	21	73	22.7778	54	11.35 AM	M	Yellow+UV+ND	-	Clean
15	7.24.2023	12	75	23.8889	55	10:20:00	M	Yellow+UV+ND	4	Clean
16	7.24.2023	12	75	23.8889	55	10:20:00	M	Yellow+UV+ND	3	Clean
17	7.24.2023	12	75	23.8889	55	10:20:00	M	Yellow+UV+ND	-	Clean
18	7.24.2023	12	75	23.8889	53	13:55:00	M	Yellow+UV+ND	3	Clean
19	7.24.2023	12	75	23.8889	53	13:55:00	M	Yellow+UV+ND	2	Clean
20	7.24.2023	12	75	23.8889	53	13:55:00	M	Yellow+UV+ND	1	Clean
21	7.25.2023	21	73	22.7778	55	11.:21 AM	M	Yellow+UV+ND	4	Clean
22	7.25.2023	21	73	22.7778	55	11.:21 AM	M	Yellow+UV+ND	6	Clean
23	7.25.2023	21	73	22.7778	55	11.:21 AM	M	Yellow+UV+ND	5	Clean
24	7.25.2023	21	75	23.8889	54	14:15:00	M	Yellow+UV+ND	-	Clean
25	7.25.2023	21	75	23.8889	54	14:15:00	M	Yellow+UV+ND	5	Clean
26	7.25.2023	21	75	23.8889	54	14:15:00	M	Yellow+UV+ND	5	Clean
27	7.26.2023	12	72	22.2222	56	10:50:00	M	Yellow+UV+ND	8	Clean
28	7.26.2023	12	72	22.2222	56	10:50:00	M	Yellow+UV+ND	3	Clean
29	7.26.2023	12	72	22.2222	56	10:50:00	M	Yellow+UV+ND	-	Clean
30	7.26.2023	21	73	22.7778	53	13:37:00	M	Yellow+UV+ND	4	Clean
1	6.28.2023	12	72	22.2222	43	16:00:00	F	Yellow+UV+ND	2	Clean
2	6.29.2023	12	81	27.2222	38	14:05:00	F	Yellow+UV+ND	-	Clean
3	7.17.2023	12	77	25	56	14:54:00	F	Yellow+UV+ND	-	Clean
4	7.17.2023	12	77	25	56	14:54:00	F	Yellow+UV+ND	-	Clean
5	7.12.2023	12	77	25	56	14:54:00	F	Yellow+UV+ND	-	Clean
6	7.18.2023	21	73	22.7778	55	14:10:00	F	Yellow+UV+ND	2	Clean
7	7.18.2023	21	73	22.7778	55	14:10:00	F	Yellow+UV+ND	-	Clean
8	7.18.2023	21	73	22.7778	55	14:10:00	F	Yellow+UV+ND	2	Clean
9	7.19.2023	21	73	22.7778	54	12:10:00	F	Yellow+UV+ND	4	Clean
10	7.19.2023	21	73	22.7778	54	12:10:00	F	Yellow+UV+ND	3	Clean
11	7.19.2023	21	73	22.7778	54	12:10:00	F	Yellow+UV+ND	-	Clean
12	7.20.2023	21	73	22.7778	54	11.35 AM	F	Yellow+UV+ND	4	Clean
13	7.20.2023	21	73	22.7778	54	11.35 AM	F	Yellow+UV+ND	1	Clean
14	7.20.2023	21	73	22.7778	54	11.35 AM	F	Yellow+UV+ND	-	Clean
15	7.24.2023	12	75	23.8889	55	10:20:00	F	Yellow+UV+ND	4	Clean
16	7.24.2023	12	75	23.8889	55	10:20:00	F	Yellow+UV+ND	3	Clean
17	7.24.2023	12	75	23.8889	55	10:20:00	F	Yellow+UV+ND	-	Clean
18	7.24.2023	12	75	23.8889	53	13:55:00	F	Yellow+UV+ND	4	Clean
19	7.24.2023	12	75	23.8889	53	13:55:00	F	Yellow+UV+ND	5	Clean
20	7.24.2023	12	75	23.8889	53	13:55:00	F	Yellow+UV+ND	1	Clean
21	7.25.2023	21	73	22.7778	55	11.:21 AM	F	Yellow+UV+ND	2	Clean
22	7.25.2023	21	73	22.7778	55	11.:21 AM	F	Yellow+UV+ND	2	Clean
23	7.25.2023	21	73	22.7778	55	11.:21 AM	F	Yellow+UV+ND	5	Clean
24	7.25.2023	21	75	23.8889	54	14:15:00	F	Yellow+UV+ND	-	Clean
25	7.25.2023	21	75	23.8889	54	14:15:00	F	Yellow+UV+ND	7	Clean
26	7.25.2023	21	75	23.8889	54	14:15:00	F	Yellow+UV+ND	3	Clean
27	7.26.2023	12	72	22.2222	56	10:50:00	F	Yellow+UV+ND	3	Clean
28	7.26.2023	12	72	22.2222	56	10:50:00	F	Yellow+UV+ND	4	Clean
29	7.26.2023	12	72	22.2222	56	10:50:00	F	Yellow+UV+ND	-	Clean
30	7.26.2023	21	73	22.7778	53	13:37:00	F	Yellow+UV+ND	3	Clean
1	6.28.2023	12	72	22.2222	43	16:00:00	?	Yellow+UV+ND	-	Clean
2	6.29.2023	12	81	27.2222	38	14:05:00	?	Yellow+UV+ND	1	Clean
3	7.17.2023	12	77	25	56	14:54:00	?	Yellow+UV+ND	-	Clean
4	7.17.2023	12	77	25	56	14:54:00	?	Yellow+UV+ND	-	Clean
5	7.12.2023	12	77	25	56	14:54:00	?	Yellow+UV+ND	-	Clean
6	7.18.2023	21	73	22.7778	55	14:10:00	?	Yellow+UV+ND	-	Clean
7	7.18.2023	21	73	22.7778	55	14:10:00	?	Yellow+UV+ND	-	Clean
8	7.18.2023	21	73	22.7778	55	14:10:00	?	Yellow+UV+ND	-	Clean
9	7.19.2023	21	73	22.7778	54	12:10:00	?	Yellow+UV+ND	-	Clean
10	7.19.2023	21	73	22.7778	54	12:10:00	?	Yellow+UV+ND	1	Clean
11	7.19.2023	21	73	22.7778	54	12:10:00	?	Yellow+UV+ND	23	Clean
12	7.20.2023	21	73	22.7778	54	11.35 AM	?	Yellow+UV+ND	-	Clean
13	7.20.2023	21	73	22.7778	54	11.35 AM	?	Yellow+UV+ND	-	Clean
14	7.20.2023	21	73	22.7778	54	11.35 AM	?	Yellow+UV+ND	6	Clean
15	7.24.2023	12	75	23.8889	55	10:20:00	?	Yellow+UV+ND	1	Clean
16	7.24.2023	12	75	23.8889	55	10:20:00	?	Yellow+UV+ND	2	Clean
17	7.24.2023	12	75	23.8889	55	10:20:00	?	Yellow+UV+ND	11	Clean
18	7.24.2023	12	75	23.8889	53	13:55:00	?	Yellow+UV+ND	1	Clean
19	7.24.2023	12	75	23.8889	53	13:55:00	?	Yellow+UV+ND	4	Clean
20	7.24.2023	12	75	23.8889	53	13:55:00	?	Yellow+UV+ND	2	Clean
21	7.25.2023	21	73	22.7778	55	11.:21 AM	?	Yellow+UV+ND	1	Clean
22	7.25.2023	21	73	22.7778	55	11.:21 AM	?	Yellow+UV+ND	1	Clean
23	7.25.2023	21	73	22.7778	55	11.:21 AM	?	Yellow+UV+ND	1	Clean
24	7.25.2023	21	75	23.8889	54	14:15:00	?	Yellow+UV+ND	11	Clean
25	7.25.2023	21	75	23.8889	54	14:15:00	?	Yellow+UV+ND	-	Clean
26	7.25.2023	21	75	23.8889	54	14:15:00	?	Yellow+UV+ND	3	Clean
27	7.26.2023	12	72	22.2222	56	10:50:00	?	Yellow+UV+ND	2	Clean
28	7.26.2023	12	72	22.2222	56	10:50:00	?	Yellow+UV+ND	1	Clean
29	7.26.2023	12	72	22.2222	56	10:50:00	?	Yellow+UV+ND	12	Clean
30	7.26.2023	21	73	22.7778	53	13:37:00	?	Yellow+UV+ND	-	Clean
1	6.28.2023	12	72	22.2222	43	16:00:00	M	NonResponders	-	Clean
2	6.29.2023	12	81	27.2222	38	14:05:00	M	NonResponders	-	Clean
3	7.17.2023	12	77	25	56	14:54:00	M	NonResponders	8	Clean
4	7.17.2023	12	77	25	56	14:54:00	M	NonResponders	18	Clean
5	7.12.2023	12	77	25	56	14:54:00	M	NonResponders	3	Clean
6	7.18.2023	21	73	22.7778	55	14:10:00	M	NonResponders	-	Clean
7	7.18.2023	21	73	22.7778	55	14:10:00	M	NonResponders	-	Clean
8	7.18.2023	21	73	22.7778	55	14:10:00	M	NonResponders	6	Clean
9	7.19.2023	21	73	22.7778	54	12:10:00	M	NonResponders	-	Clean
10	7.19.2023	21	73	22.7778	54	12:10:00	M	NonResponders	1	Clean
11	7.19.2023	21	73	22.7778	54	12:10:00	M	NonResponders	-	Clean
12	7.20.2023	21	73	22.7778	54	11.35 AM	M	NonResponders	3	Clean
13	7.20.2023	21	73	22.7778	54	11.35 AM	M	NonResponders	-	Clean
14	7.20.2023	21	73	22.7778	54	11.35 AM	M	NonResponders	-	Clean
15	7.24.2023	12	75	23.8889	55	10:20:00	M	NonResponders	4	Clean
16	7.24.2023	12	75	23.8889	55	10:20:00	M	NonResponders	1	Clean
17	7.24.2023	12	75	23.8889	55	10:20:00	M	NonResponders	-	Clean
18	7.24.2023	12	75	23.8889	53	13:55:00	M	NonResponders	2	Clean
19	7.24.2023	12	75	23.8889	53	13:55:00	M	NonResponders	-	Clean
20	7.24.2023	12	75	23.8889	53	13:55:00	M	NonResponders	6	Clean
21	7.25.2023	21	73	22.7778	55	11.:21 AM	M	NonResponders	1	Clean
22	7.25.2023	21	73	22.7778	55	11.:21 AM	M	NonResponders	1	Clean
23	7.25.2023	21	73	22.7778	55	11.:21 AM	M	NonResponders	3	Clean
24	7.25.2023	21	75	23.8889	54	14:15:00	M	NonResponders	-	Clean
25	7.25.2023	21	75	23.8889	54	14:15:00	M	NonResponders	4	Clean
26	7.25.2023	21	75	23.8889	54	14:15:00	M	NonResponders	6	Clean
27	7.26.2023	12	72	22.2222	56	10:50:00	M	NonResponders	1	Clean
28	7.26.2023	12	72	22.2222	56	10:50:00	M	NonResponders	3	Clean
29	7.26.2023	12	72	22.2222	56	10:50:00	M	NonResponders	-	Clean
30	7.26.2023	21	73	22.7778	53	13:37:00	M	NonResponders	1	Clean
1	6.28.2023	12	72	22.2222	43	16:00:00	F	NonResponders	-	Clean
2	6.29.2023	12	81	27.2222	38	14:05:00	F	NonResponders	-	Clean
3	7.17.2023	12	77	25	56	14:54:00	F	NonResponders	-	Clean
4	7.17.2023	12	77	25	56	14:54:00	F	NonResponders	-	Clean
5	7.12.2023	12	77	25	56	14:54:00	F	NonResponders	-	Clean
6	7.18.2023	21	73	22.7778	55	14:10:00	F	NonResponders	-	Clean
7	7.18.2023	21	73	22.7778	55	14:10:00	F	NonResponders	1	Clean
8	7.18.2023	21	73	22.7778	55	14:10:00	F	NonResponders	4	Clean
9	7.19.2023	21	73	22.7778	54	12:10:00	F	NonResponders	-	Clean
10	7.19.2023	21	73	22.7778	54	12:10:00	F	NonResponders	2	Clean
11	7.19.2023	21	73	22.7778	54	12:10:00	F	NonResponders	-	Clean
12	7.20.2023	21	73	22.7778	54	11.35 AM	F	NonResponders	1	Clean
13	7.20.2023	21	73	22.7778	54	11.35 AM	F	NonResponders	3	Clean
14	7.20.2023	21	73	22.7778	54	11.35 AM	F	NonResponders	-	Clean
15	7.24.2023	12	75	23.8889	55	10:20:00	F	NonResponders	3	Clean
16	7.24.2023	12	75	23.8889	55	10:20:00	F	NonResponders	2	Clean
17	7.24.2023	12	75	23.8889	55	10:20:00	F	NonResponders	-	Clean
18	7.24.2023	12	75	23.8889	53	13:55:00	F	NonResponders	1	Clean
19	7.24.2023	12	75	23.8889	53	13:55:00	F	NonResponders	3	Clean
20	7.24.2023	12	75	23.8889	53	13:55:00	F	NonResponders	3	Clean
21	7.25.2023	21	73	22.7778	55	11.:21 AM	F	NonResponders	1	Clean
22	7.25.2023	21	73	22.7778	55	11.:21 AM	F	NonResponders	-	Clean
23	7.25.2023	21	73	22.7778	55	11.:21 AM	F	NonResponders	2	Clean
24	7.25.2023	21	75	23.8889	54	14:15:00	F	NonResponders	-	Clean
25	7.25.2023	21	75	23.8889	54	14:15:00	F	NonResponders	-	Clean
26	7.25.2023	21	75	23.8889	54	14:15:00	F	NonResponders	2	Clean
27	7.26.2023	12	72	22.2222	56	10:50:00	F	NonResponders	1	Clean
28	7.26.2023	12	72	22.2222	56	10:50:00	F	NonResponders	-	Clean
29	7.26.2023	12	72	22.2222	56	10:50:00	F	NonResponders	-	Clean
30	7.26.2023	21	73	22.7778	53	13:37:00	F	NonResponders	3	Clean
1	6.28.2023	12	72	22.2222	43	16:00:00	?	NonResponders	10	Clean
2	6.29.2023	12	81	27.2222	38	14:05:00	?	NonResponders	11	Clean
3	7.17.2023	12	77	25	56	14:54:00	?	NonResponders	-	Clean
4	7.17.2023	12	77	25	56	14:54:00	?	NonResponders	-	Clean
5	7.12.2023	12	77	25	56	14:54:00	?	NonResponders	-	Clean
6	7.18.2023	21	73	22.7778	55	14:10:00	?	NonResponders	-	Clean
7	7.18.2023	21	73	22.7778	55	14:10:00	?	NonResponders	-	Clean
8	7.18.2023	21	73	22.7778	55	14:10:00	?	NonResponders	-	Clean
9	7.19.2023	21	73	22.7778	54	12:10:00	?	NonResponders	-	Clean
10	7.19.2023	21	73	22.7778	54	12:10:00	?	NonResponders	-	Clean
11	7.19.2023	21	73	22.7778	54	12:10:00	?	NonResponders	4	Clean
12	7.20.2023	21	73	22.7778	54	11.35 AM	?	NonResponders	-	Clean
13	7.20.2023	21	73	22.7778	54	11.35 AM	?	NonResponders	-	Clean
14	7.20.2023	21	73	22.7778	54	11.35 AM	?	NonResponders	9	Clean
15	7.24.2023	12	75	23.8889	55	10:20:00	?	NonResponders	1	Clean
16	7.24.2023	12	75	23.8889	55	10:20:00	?	NonResponders	2	Clean
17	7.24.2023	12	75	23.8889	55	10:20:00	?	NonResponders	8	Clean
18	7.24.2023	12	75	23.8889	53	13:55:00	?	NonResponders	4	Clean
19	7.24.2023	12	75	23.8889	53	13:55:00	?	NonResponders	-	Clean
20	7.24.2023	12	75	23.8889	53	13:55:00	?	NonResponders	2	Clean
21	7.25.2023	21	73	22.7778	55	11.:21 AM	?	NonResponders	3	Clean
22	7.25.2023	21	73	22.7778	55	11.:21 AM	?	NonResponders	-	Clean
23	7.25.2023	21	73	22.7778	55	11.:21 AM	?	NonResponders	3	Clean
24	7.25.2023	21	75	23.8889	54	14:15:00	?	NonResponders	6	Clean
25	7.25.2023	21	75	23.8889	54	14:15:00	?	NonResponders	-	Clean
26	7.25.2023	21	75	23.8889	54	14:15:00	?	NonResponders	2	Clean
27	7.26.2023	12	72	22.2222	56	10:50:00	?	NonResponders	1	Clean
28	7.26.2023	12	72	22.2222	56	10:50:00	?	NonResponders	-	Clean
29	7.26.2023	12	72	22.2222	56	10:50:00	?	NonResponders	9	Clean
30	7.26.2023	21	73	22.7778	53	13:37:00	?	NonResponders	2	Clean
1	8.7.2023	12	72	22.2222	58	10:07:00	M	Green+UV+ND	6	Hot
2	8.7.2023	12	72	22.2222	58	10:07:00	M	Green+UV+ND	-	Hot
3	8.7.2023	12	72	22.2222	58	10:07:00	M	Green+UV+ND	5	Hot
4	8.7.2023	21	72	22.2222	56	13:30:00	M	Green+UV+ND	5	Hot
5	8.7.2023	21	72	22.2222	56	13:30:00	M	Green+UV+ND	9	Hot
6	8.7.2023	21	72	22.2222	56	13:30:00	M	Green+UV+ND	-	Hot
7	8.14.2023	12	70	21.1111	57	11:02:00	M	Green+UV+ND	2	Hot
8	8.14.2023	12	70	21.1111	57	11:02:00	M	Green+UV+ND	3	Hot
9	8.15.2023	21	72	22.2222	59	10:38:00	M	Green+UV+ND	2	Hot
10	8.15.2023	21	72	22.2222	59	10:38:00	M	Green+UV+ND	-	Hot
11	8.15.2023	21	72	22.2222	57	12:54:00	M	Green+UV+ND	3	Hot
12	8.15.2023	21	72	22.2222	57	12:54:00	M	Green+UV+ND	2	Hot
13	8.15.2023	12	72	22.2222	56	14:05:00	M	Green+UV+ND	6	Hot
14	8.15.2023	12	72	22.2222	56	14:05:00	M	Green+UV+ND	-	Hot
15	8.28.2023	12	72	22.2222	60	10:16:00	M	Green+UV+ND	2	Hot
16	8.28.2023	12	72	22.2222	60	10:16:00	M	Green+UV+ND	-	Hot
17	8.28.2023	21	72	22.2222	57	14:13:00	M	Green+UV+ND	2	Hot
18	8.28.2023	21	72	22.2222	57	14:13:00	M	Green+UV+ND	3	Hot
19	8.29.2023	12	72	22.2222	58	09:45:00	M	Green+UV+ND	5	Hot
20	8.29.2023	12	72	22.2222	58	09:45:00	M	Green+UV+ND	6	Hot
21	9.5.2023	12	72	22.2222	58	16:48:00	M	Green+UV+ND	4	Hot
22	9.5.2023	12	72	22.2222	58	16:48:00	M	Green+UV+ND	9	Hot
23	9.5.2023	12	72	22.2222	58	16:48:00	M	Green+UV+ND	11	Hot
24	9.6.2023	21	72	22.2222	57	13:16:00	M	Green+UV+ND	-	Hot
25	9.6.2023	21	72	22.2222	57	13:16:00	M	Green+UV+ND	6	Hot
26	9.6.2023	21	72	22.2222	57	13:16:00	M	Green+UV+ND	4	Hot
1	8.7.2023	12	72	22.2222	58	10:07:00	F	Green+UV+ND	4	Hot
2	8.7.2023	12	72	22.2222	58	10:07:00	F	Green+UV+ND	-	Hot
3	8.7.2023	12	72	22.2222	58	10:07:00	F	Green+UV+ND	7	Hot
4	8.7.2023	21	72	22.2222	56	13:30:00	F	Green+UV+ND	4	Hot
5	8.7.2023	21	72	22.2222	56	13:30:00	F	Green+UV+ND	7	Hot
6	8.7.2023	21	72	22.2222	56	13:30:00	F	Green+UV+ND	-	Hot
7	8.14.2023	12	70	21.1111	57	11:02:00	F	Green+UV+ND	1	Hot
8	8.14.2023	12	70	21.1111	57	11:02:00	F	Green+UV+ND	2	Hot
9	8.15.2023	21	72	22.2222	59	10:38:00	F	Green+UV+ND	2	Hot
10	8.15.2023	21	72	22.2222	59	10:38:00	F	Green+UV+ND	-	Hot
11	8.15.2023	21	72	22.2222	57	12:54:00	F	Green+UV+ND	4	Hot
12	8.15.2023	21	72	22.2222	57	12:54:00	F	Green+UV+ND	3	Hot
13	8.15.2023	12	72	22.2222	56	14:05:00	F	Green+UV+ND	2	Hot
14	8.15.2023	12	72	22.2222	56	14:05:00	F	Green+UV+ND	-	Hot
15	8.28.2023	12	72	22.2222	60	10:16:00	F	Green+UV+ND	3	Hot
16	8.28.2023	12	72	22.2222	60	10:16:00	F	Green+UV+ND	-	Hot
17	8.28.2023	21	72	22.2222	57	14:13:00	F	Green+UV+ND	2	Hot
18	8.28.2023	21	72	22.2222	57	14:13:00	F	Green+UV+ND	5	Hot
19	8.29.2023	12	72	22.2222	58	09:45:00	F	Green+UV+ND	6	Hot
20	8.29.2023	12	72	22.2222	58	09:45:00	F	Green+UV+ND	4	Hot
21	9.5.2023	12	72	22.2222	58	16:48:00	F	Green+UV+ND	7	Hot
22	9.5.2023	12	72	22.2222	58	16:48:00	F	Green+UV+ND	5	Hot
23	9.5.2023	12	72	22.2222	58	16:48:00	F	Green+UV+ND	1	Hot
24	9.6.2023	21	72	22.2222	57	13:16:00	F	Green+UV+ND	-	Hot
25	9.6.2023	21	72	22.2222	57	13:16:00	F	Green+UV+ND	3	Hot
26	9.6.2023	21	72	22.2222	57	13:16:00	F	Green+UV+ND	5	Hot
1	8.7.2023	12	72	22.2222	58	10:07:00	?	Green+UV+ND	4	Hot
2	8.7.2023	12	72	22.2222	58	10:07:00	?	Green+UV+ND	16	Hot
3	8.7.2023	12	72	22.2222	58	10:07:00	?	Green+UV+ND	3	Hot
4	8.7.2023	21	72	22.2222	56	13:30:00	?	Green+UV+ND	-	Hot
5	8.7.2023	21	72	22.2222	56	13:30:00	?	Green+UV+ND	3	Hot
6	8.7.2023	21	72	22.2222	56	13:30:00	?	Green+UV+ND	18	Hot
7	8.14.2023	12	70	21.1111	57	11:02:00	?	Green+UV+ND	2	Hot
8	8.14.2023	12	70	21.1111	57	11:02:00	?	Green+UV+ND	-	Hot
9	8.15.2023	21	72	22.2222	59	10:38:00	?	Green+UV+ND	3	Hot
10	8.15.2023	21	72	22.2222	59	10:38:00	?	Green+UV+ND	16	Hot
11	8.15.2023	21	72	22.2222	57	12:54:00	?	Green+UV+ND	1	Hot
12	8.15.2023	21	72	22.2222	57	12:54:00	?	Green+UV+ND	3	Hot
13	8.15.2023	12	72	22.2222	56	14:05:00	?	Green+UV+ND	1	Hot
14	8.15.2023	12	72	22.2222	56	14:05:00	?	Green+UV+ND	5	Hot
15	8.28.2023	12	72	22.2222	60	10:16:00	?	Green+UV+ND	1	Hot
16	8.28.2023	12	72	22.2222	60	10:16:00	?	Green+UV+ND	23	Hot
17	8.28.2023	21	72	22.2222	57	14:13:00	?	Green+UV+ND	3	Hot
18	8.28.2023	21	72	22.2222	57	14:13:00	?	Green+UV+ND	2	Hot
19	8.29.2023	12	72	22.2222	58	09:45:00	?	Green+UV+ND	1	Hot
20	8.29.2023	12	72	22.2222	58	09:45:00	?	Green+UV+ND	3	Hot
21	9.5.2023	12	72	22.2222	58	16:48:00	?	Green+UV+ND	-	Hot
22	9.5.2023	12	72	22.2222	58	16:48:00	?	Green+UV+ND	-	Hot
23	9.5.2023	12	72	22.2222	58	16:48:00	?	Green+UV+ND	2	Hot
24	9.6.2023	21	72	22.2222	57	13:16:00	?	Green+UV+ND	13	Hot
25	9.6.2023	21	72	22.2222	57	13:16:00	?	Green+UV+ND	-	Hot
26	9.6.2023	21	72	22.2222	57	13:16:00	?	Green+UV+ND	-	Hot
1	8.7.2023	12	72	22.2222	58	10:07:00	M	Yellow+UV+ND	3	Hot
2	8.7.2023	12	72	22.2222	58	10:07:00	M	Yellow+UV+ND	-	Hot
3	8.7.2023	12	72	22.2222	58	10:07:00	M	Yellow+UV+ND	8	Hot
4	8.7.2023	21	72	22.2222	56	13:30:00	M	Yellow+UV+ND	4	Hot
5	8.7.2023	21	72	22.2222	56	13:30:00	M	Yellow+UV+ND	2	Hot
6	8.7.2023	21	72	22.2222	56	13:30:00	M	Yellow+UV+ND	-	Hot
7	8.14.2023	12	70	21.1111	57	11:02:00	M	Yellow+UV+ND	3	Hot
8	8.14.2023	12	70	21.1111	57	11:02:00	M	Yellow+UV+ND	6	Hot
9	8.15.2023	21	72	22.2222	59	10:38:00	M	Yellow+UV+ND	4	Hot
10	8.15.2023	21	72	22.2222	59	10:38:00	M	Yellow+UV+ND	-	Hot
11	8.15.2023	21	72	22.2222	57	12:54:00	M	Yellow+UV+ND	5	Hot
12	8.15.2023	21	72	22.2222	57	12:54:00	M	Yellow+UV+ND	8	Hot
13	8.15.2023	12	72	22.2222	56	14:05:00	M	Yellow+UV+ND	3	Hot
14	8.15.2023	12	72	22.2222	56	14:05:00	M	Yellow+UV+ND	-	Hot
15	8.28.2023	12	72	22.2222	60	10:16:00	M	Yellow+UV+ND	3	Hot
16	8.28.2023	12	72	22.2222	60	10:16:00	M	Yellow+UV+ND	-	Hot
17	8.28.2023	21	72	22.2222	57	14:13:00	M	Yellow+UV+ND	2	Hot
18	8.28.2023	21	72	22.2222	57	14:13:00	M	Yellow+UV+ND	1	Hot
19	8.29.2023	12	72	22.2222	58	09:45:00	M	Yellow+UV+ND	4	Hot
20	8.29.2023	12	72	22.2222	58	09:45:00	M	Yellow+UV+ND	1	Hot
21	9.5.2023	12	72	22.2222	58	16:48:00	M	Yellow+UV+ND	4	Hot
22	9.5.2023	12	72	22.2222	58	16:48:00	M	Yellow+UV+ND	5	Hot
23	9.5.2023	12	72	22.2222	58	16:48:00	M	Yellow+UV+ND	7	Hot
24	9.6.2023	21	72	22.2222	57	13:16:00	M	Yellow+UV+ND	-	Hot
25	9.6.2023	21	72	22.2222	57	13:16:00	M	Yellow+UV+ND	7	Hot
26	9.6.2023	21	72	22.2222	57	13:16:00	M	Yellow+UV+ND	4	Hot
1	8.7.2023	12	72	22.2222	58	10:07:00	F	Yellow+UV+ND	1	Hot
2	8.7.2023	12	72	22.2222	58	10:07:00	F	Yellow+UV+ND	-	Hot
3	8.7.2023	12	72	22.2222	58	10:07:00	F	Yellow+UV+ND	-	Hot
4	8.7.2023	21	72	22.2222	56	13:30:00	F	Yellow+UV+ND	3	Hot
5	8.7.2023	21	72	22.2222	56	13:30:00	F	Yellow+UV+ND	3	Hot
6	8.7.2023	21	72	22.2222	56	13:30:00	F	Yellow+UV+ND	-	Hot
7	8.14.2023	12	70	21.1111	57	11:02:00	F	Yellow+UV+ND	2	Hot
8	8.14.2023	12	70	21.1111	57	11:02:00	F	Yellow+UV+ND	2	Hot
9	8.15.2023	21	72	22.2222	59	10:38:00	F	Yellow+UV+ND	2	Hot
10	8.15.2023	21	72	22.2222	59	10:38:00	F	Yellow+UV+ND	-	Hot
11	8.15.2023	21	72	22.2222	57	12:54:00	F	Yellow+UV+ND	6	Hot
12	8.15.2023	21	72	22.2222	57	12:54:00	F	Yellow+UV+ND	5	Hot
13	8.15.2023	12	72	22.2222	56	14:05:00	F	Yellow+UV+ND	2	Hot
14	8.15.2023	12	72	22.2222	56	14:05:00	F	Yellow+UV+ND	-	Hot
15	8.28.2023	12	72	22.2222	60	10:16:00	F	Yellow+UV+ND	4	Hot
16	8.28.2023	12	72	22.2222	60	10:16:00	F	Yellow+UV+ND	-	Hot
17	8.28.2023	21	72	22.2222	57	14:13:00	F	Yellow+UV+ND	1	Hot
18	8.28.2023	21	72	22.2222	57	14:13:00	F	Yellow+UV+ND	2	Hot
19	8.29.2023	12	72	22.2222	58	09:45:00	F	Yellow+UV+ND	7	Hot
20	8.29.2023	12	72	22.2222	58	09:45:00	F	Yellow+UV+ND	3	Hot
21	9.5.2023	12	72	22.2222	58	16:48:00	F	Yellow+UV+ND	7	Hot
22	9.5.2023	12	72	22.2222	58	16:48:00	F	Yellow+UV+ND	4	Hot
23	9.5.2023	12	72	22.2222	58	16:48:00	F	Yellow+UV+ND	5	Hot
24	9.6.2023	21	72	22.2222	57	13:16:00	F	Yellow+UV+ND	-	Hot
25	9.6.2023	21	72	22.2222	57	13:16:00	F	Yellow+UV+ND	4	Hot
26	9.6.2023	21	72	22.2222	57	13:16:00	F	Yellow+UV+ND	1	Hot
1	8.7.2023	12	72	22.2222	58	10:07:00	?	Yellow+UV+ND	3	Hot
2	8.7.2023	12	72	22.2222	58	10:07:00	?	Yellow+UV+ND	12	Hot
3	8.7.2023	12	72	22.2222	58	10:07:00	?	Yellow+UV+ND	2	Hot
4	8.7.2023	21	72	22.2222	56	13:30:00	?	Yellow+UV+ND	1	Hot
5	8.7.2023	21	72	22.2222	56	13:30:00	?	Yellow+UV+ND	3	Hot
6	8.7.2023	21	72	22.2222	56	13:30:00	?	Yellow+UV+ND	14	Hot
7	8.14.2023	12	70	21.1111	57	11:02:00	?	Yellow+UV+ND	3	Hot
8	8.14.2023	12	70	21.1111	57	11:02:00	?	Yellow+UV+ND	1	Hot
9	8.15.2023	21	72	22.2222	59	10:38:00	?	Yellow+UV+ND	3	Hot
10	8.15.2023	21	72	22.2222	59	10:38:00	?	Yellow+UV+ND	9	Hot
11	8.15.2023	21	72	22.2222	57	12:54:00	?	Yellow+UV+ND	2	Hot
12	8.15.2023	21	72	22.2222	57	12:54:00	?	Yellow+UV+ND		Hot
13	8.15.2023	12	72	22.2222	56	14:05:00	?	Yellow+UV+ND	2	Hot
14	8.15.2023	12	72	22.2222	56	14:05:00	?	Yellow+UV+ND	7	Hot
15	8.28.2023	12	72	22.2222	60	10:16:00	?	Yellow+UV+ND	3	Hot
16	8.28.2023	12	72	22.2222	60	10:16:00	?	Yellow+UV+ND	9	Hot
17	8.28.2023	21	72	22.2222	57	14:13:00	?	Yellow+UV+ND	1	Hot
18	8.28.2023	21	72	22.2222	57	14:13:00	?	Yellow+UV+ND	3	Hot
19	8.29.2023	12	72	22.2222	58	09:45:00	?	Yellow+UV+ND	4	Hot
20	8.29.2023	12	72	22.2222	58	09:45:00	?	Yellow+UV+ND	1	Hot
21	9.5.2023	12	72	22.2222	58	16:48:00	?	Yellow+UV+ND	-	Hot
22	9.5.2023	12	72	22.2222	58	16:48:00	?	Yellow+UV+ND	-	Hot
23	9.5.2023	12	72	22.2222	58	16:48:00	?	Yellow+UV+ND		Hot
24	9.6.2023	21	72	22.2222	57	13:16:00	?	Yellow+UV+ND	11	Hot
25	9.6.2023	21	72	22.2222	57	13:16:00	?	Yellow+UV+ND	1	Hot
26	9.6.2023	21	72	22.2222	57	13:16:00	?	Yellow+UV+ND	-	Hot
1	8.7.2023	12	72	22.2222	58	10:07:00	M	NonResponders	-	Hot
2	8.7.2023	12	72	22.2222	58	10:07:00	M	NonResponders	-	Hot
3	8.7.2023	12	72	22.2222	58	10:07:00	M	NonResponders	2	Hot
4	8.7.2023	21	72	22.2222	56	13:30:00	M	NonResponders	2	Hot
5	8.7.2023	21	72	22.2222	56	13:30:00	M	NonResponders	-	Hot
6	8.7.2023	21	72	22.2222	56	13:30:00	M	NonResponders	-	Hot
7	8.14.2023	12	70	21.1111	57	11:02:00	M	NonResponders	2	Hot
8	8.14.2023	12	70	21.1111	57	11:02:00	M	NonResponders	1	Hot
9	8.15.2023	21	72	22.2222	59	10:38:00	M	NonResponders	3	Hot
10	8.15.2023	21	72	22.2222	59	10:38:00	M	NonResponders	1	Hot
11	8.15.2023	21	72	22.2222	57	12:54:00	M	NonResponders	1	Hot
12	8.15.2023	21	72	22.2222	57	12:54:00	M	NonResponders	4	Hot
13	8.15.2023	12	72	22.2222	56	14:05:00	M	NonResponders	2	Hot
14	8.15.2023	12	72	22.2222	56	14:05:00	M	NonResponders	-	Hot
15	8.28.2023	12	72	22.2222	60	10:16:00	M	NonResponders	1	Hot
16	8.28.2023	12	72	22.2222	60	10:16:00	M	NonResponders	-	Hot
17	8.28.2023	21	72	22.2222	57	14:13:00	M	NonResponders	-	Hot
18	8.28.2023	21	72	22.2222	57	14:13:00	M	NonResponders	1	Hot
19	8.29.2023	12	72	22.2222	58	09:45:00	M	NonResponders	1	Hot
20	8.29.2023	12	72	22.2222	58	09:45:00	M	NonResponders	3	Hot
21	9.5.2023	12	72	22.2222	58	16:48:00	M	NonResponders	7	Hot
22	9.5.2023	12	72	22.2222	58	16:48:00	M	NonResponders	5	Hot
23	9.5.2023	12	72	22.2222	58	16:48:00	M	NonResponders	2	Hot
24	9.6.2023	21	72	22.2222	57	13:16:00	M	NonResponders	-	Hot
25	9.6.2023	21	72	22.2222	57	13:16:00	M	NonResponders	3	Hot
26	9.6.2023	21	72	22.2222	57	13:16:00	M	NonResponders	2	Hot
1	8.7.2023	12	72	22.2222	58	10:07:00	F	NonResponders	-	Hot
2	8.7.2023	12	72	22.2222	58	10:07:00	F	NonResponders	-	Hot
3	8.7.2023	12	72	22.2222	58	10:07:00	F	NonResponders	2	Hot
4	8.7.2023	21	72	22.2222	56	13:30:00	F	NonResponders	1	Hot
5	8.7.2023	21	72	22.2222	56	13:30:00	F	NonResponders	2	Hot
6	8.7.2023	21	72	22.2222	56	13:30:00	F	NonResponders	-	Hot
7	8.14.2023	12	70	21.1111	57	11:02:00	F	NonResponders	-	Hot
8	8.14.2023	12	70	21.1111	57	11:02:00	F	NonResponders	2	Hot
9	8.15.2023	21	72	22.2222	59	10:38:00	F	NonResponders	-	Hot
10	8.15.2023	21	72	22.2222	59	10:38:00	F	NonResponders	2	Hot
11	8.15.2023	21	72	22.2222	57	12:54:00	F	NonResponders	1	Hot
12	8.15.2023	21	72	22.2222	57	12:54:00	F	NonResponders	1	Hot
13	8.15.2023	12	72	22.2222	56	14:05:00	F	NonResponders	3	Hot
14	8.15.2023	12	72	22.2222	56	14:05:00	F	NonResponders	-	Hot
15	8.28.2023	12	72	22.2222	60	10:16:00	F	NonResponders	2	Hot
16	8.28.2023	12	72	22.2222	60	10:16:00	F	NonResponders	-	Hot
17	8.28.2023	21	72	22.2222	57	14:13:00	F	NonResponders	2	Hot
18	8.28.2023	21	72	22.2222	57	14:13:00	F	NonResponders	1	Hot
19	8.29.2023	12	72	22.2222	58	09:45:00	F	NonResponders	2	Hot
20	8.29.2023	12	72	22.2222	58	09:45:00	F	NonResponders	2	Hot
21	9.5.2023	12	72	22.2222	58	16:48:00	F	NonResponders	2	Hot
22	9.5.2023	12	72	22.2222	58	16:48:00	F	NonResponders	-	Hot
23	9.5.2023	12	72	22.2222	58	16:48:00	F	NonResponders	2	Hot
24	9.6.2023	21	72	22.2222	57	13:16:00	F	NonResponders	-	Hot
25	9.6.2023	21	72	22.2222	57	13:16:00	F	NonResponders	2	Hot
26	9.6.2023	21	72	22.2222	57	13:16:00	F	NonResponders	5	Hot
1	8.7.2023	12	72	22.2222	58	10:07:00	?	NonResponders	3	Hot
2	8.7.2023	12	72	22.2222	58	10:07:00	?	NonResponders	7	Hot
3	8.7.2023	12	72	22.2222	58	10:07:00	?	NonResponders	-	Hot
4	8.7.2023	21	72	22.2222	56	13:30:00	?	NonResponders	1	Hot
5	8.7.2023	21	72	22.2222	56	13:30:00	?	NonResponders	-	Hot
6	8.7.2023	21	72	22.2222	56	13:30:00	?	NonResponders	5	Hot
7	8.14.2023	12	70	21.1111	57	11:02:00	?	NonResponders	7	Hot
8	8.14.2023	12	70	21.1111	57	11:02:00	?	NonResponders	3	Hot
9	8.15.2023	21	72	22.2222	59	10:38:00	?	NonResponders	4	Hot
10	8.15.2023	21	72	22.2222	59	10:38:00	?	NonResponders	7	Hot
11	8.15.2023	21	72	22.2222	57	12:54:00	?	NonResponders	3	Hot
12	8.15.2023	21	72	22.2222	57	12:54:00	?	NonResponders	2	Hot
13	8.15.2023	12	72	22.2222	56	14:05:00	?	NonResponders	-	Hot
14	8.15.2023	12	72	22.2222	56	14:05:00	?	NonResponders	4	Hot
15	8.28.2023	12	72	22.2222	60	10:16:00	?	NonResponders	3	Hot
16	8.28.2023	12	72	22.2222	60	10:16:00	?	NonResponders	6	Hot
17	8.28.2023	21	72	22.2222	57	14:13:00	?	NonResponders	2	Hot
18	8.28.2023	21	72	22.2222	57	14:13:00	?	NonResponders	3	Hot
19	8.29.2023	12	72	22.2222	58	09:45:00	?	NonResponders	-	Hot
20	8.29.2023	12	72	22.2222	58	09:45:00	?	NonResponders	3	Hot
21	9.5.2023	12	72	22.2222	58	16:48:00	?	NonResponders	-	Hot
22	9.5.2023	12	72	22.2222	58	16:48:00	?	NonResponders	-	Hot
23	9.5.2023	12	72	22.2222	58	16:48:00	?	NonResponders	-	Hot
24	9.6.2023	21	72	22.2222	57	13:16:00	?	NonResponders	10	Hot
25	9.6.2023	21	72	22.2222	57	13:16:00	?	NonResponders	-	Hot
26	9.6.2023	21	72	22.2222	57	13:16:00	?	NonResponders	-	Hot
1	7.26.2023	21	73	22.7778	53	1:37OM	M	Green+UV+ND	-	Clean
2
3
4
5
6
7
8
9
10
11
12
13
14
15
16
17
1	7.26.2023	21	73	22.7778	53	1:37OM	M	Green+UV+ND	-	Clean
2
3
4
5
6
7
8
9
10
11
12
13
14
15
16
17
1	7.26.2023	21	73	22.7778	53	1:37OM	M	Green+UV+ND	-	Clean
2
3
4
5
6
7
8
9
10
11
12
13
14
15
16
17
1	7.26.2023	21	73	22.7778	53	1:37OM	M	Yellow+UV+ ND	-	Clean
2
3
4
5
6
7
8
9
10
11
12
13
14
15
16
17
1	7.26.2023	21	73	22.7778	53	1:37OM	F	Yellow+UV+ ND	-	Clean
2
3
4
5
6
7
8
9
10
11
12
13
14
15
16
17
1	7.26.2023	21	73	22.7778	53	1:37OM	?	Yellow+UV+ ND	-	Clean
2
3
4
5
6
7
8
9
10
11
12
13
14
15
16
17
