# Supplementary material for: Tomato yellow leaf curl virus manipulates Bemisia tabaci, MEAM1 both directly and indirectly through changes in visual and volatile cues
Source: PeerJ. 2024 Jul 23;12:e17665. doi: 10.7717/peerj.17665 (PMC11276755; doi:10.7717/peerj.17665)
Supplement: Supplemental Information 3 [file peerj-12-17665-s003.xlsx]

## Sheet: Sheet1
wavelength	d19.inf.b19.darkyellowspot1	d19.inf.b19.darkyellowspot1b	d19.inf.b19.darkyellowspot1c	1.21.tylcv.inf.t1r2.dyellspot1	1.21.tylcv.inf.t1r2.dyellpot1	jan27.b16.infected.2wk.vol+leaf.1dy.SSM	jan26.d21.infected.2wk.dy1.2.SSM	jan26.d21.infected.2wk.dy1.SSM	b.33.feb.10.2wk.infected.dy1	dy1a.tylcv.2weekinfested.tomato leaves.2.23.21	dy1b.tylcv.2weekinfested.tomato leaves.	b1.4.28.21.2monthinfected
184	0.001	0.001	0.001	0.001	0.001	0.00014006	0.00014006	0.00014006	0.001	0.001	0.001	0.001
184.5	0.001	0.001	0.001	0.001	0.001	0.001	0.001	0.001	0.001	0.001	0.001	0.001
185	0.001	0.001	0.001	0.001	0.001	0.001	0.001	0.001	0.001	0.001	0.001	0.001
185.5	0.001	0.001	0.001	0.001	0.001	0.001	0.001	0.001	0.001	0.001	0.001	0.001
186	0.001	0.001	0.001	0.001	0.001	0.001	0.001	0.001	0.001	0.001	0.001	0.001
186.5	0.001	0.001	0.001	0.001	0.001	0.001	0.001	0.001	0.001	0.001	0.001	0.001
187	0.001	0.001	0.001	0.001	0.001	0.001	0.001	0.001	0.001	0.001	0.001	0.001
187.5	0.001	0.001	0.001	0.001	0.001	0.001	0.001	0.001	0.001	0.001	0.001	0.001
188	0.001	0.001	0.001	0.001	0.001	0.001	0.001	0.001	0.001	0.001	0.001	0.001
188.5	0.001	0.001	0.001	0.001	0.001	0.001	0.001	0.001	0.001	0.001	0.001	0.001
189	0.001	0.001	0.001	0.001	0.001	12.287	18.011	15.409	0.001	0.001	0.001	0.001
189.5	55.351	-4.6833	-141.68	-189.68	-223.64	68.309	100.39	88.686	83.226	674.09	1878.7	-2252.8
190	90.909	16.787	-41.196	-138.27	-181.89	155.29	229.98	212.23	-671.21	135.51	213.56	-519.42
190.5	80.961	26.649	16.874	-34.83	-79.691	271	407.98	384.93	-19.304	-40.2	-183.15	-38.507
191	73.502	29.219	-2.4409	-4.1968	-34.88	287.79	422.91	378.88	-25.928	-50.967	-140.93	2.2414
191.5	57.54	13.986	-15.925	0.61804	-24.624	300.45	443.54	401.81	-28.346	-57.835	-128.34	23.831
192	59.204	8.6268	-10.794	3.5124	-17.597	330.08	498.15	485.21	-3.9931	-63.982	-137.27	6.8282
192.5	65.339	5.0197	-10.908	-1.1557	-20.285	377.98	582.92	601	15.301	-60.568	-134.4	-20.433
193	68.356	4.7551	-10.302	-13.21	-29.195	626.3	967.65	959.78	19.953	-46.796	-112.71	-23.348
193.5	70.004	7.3185	-10.246	-26.524	-45.254	1144.1	1722.9	1589.3	18.451	-33.54	-92.24	13.791
194	73.895	8.5103	-2.5836	-30.316	-55.143	1638.4	2420.9	2147.2	15.231	-29.947	-80.488	28.066
194.5	66.876	10.192	10.147	-27.176	-56.868	1258.7	1772.2	1536.3	1.0601	-37.919	-91.308	40.709
195	56.79	4.0623	11.577	-21.978	-56.639	721.69	931.78	798.59	-10.274	-53.296	-129.65	43.472
195.5	42.211	-0.75368	3.9406	-17.478	-46.281	529.01	652.35	545.89	-16.85	-67.952	-180.28	53.384
196	30.351	-8.9551	-8.9143	-26.581	-43.92	434.52	525.1	428.59	-35.351	-69.347	-212.65	60.656
196.5	29.837	-13.077	-19.405	-33.269	-40.953	404.61	510.97	406.09	-31.71	-57.602	-199.02	64.36
197	32.753	-7.0189	-20.216	-33.399	-37.236	404.94	578.07	452.13	-18.938	-37.628	-150.48	82.979
197.5	40.044	0.79182	-10.872	-23.365	-38.218	419.72	650.27	539.34	-11.678	-26.442	-118.96	98.874
198	44.459	9.081	-6.8534	-13.163	-38.76	478.06	751.34	671.58	-10.687	-31.957	-114.55	109.01
198.5	44.335	14.59	-12.304	-8.3806	-39.054	607.87	888.09	852.71	-15.192	-37.645	-118.31	114.41
199	50.165	15.338	-16.657	-4.137	-39.74	776.51	979.45	996.66	-18.075	-44.117	-125.2	94.595
199.5	55.732	6.7167	-23.455	-11.197	-46.655	883.91	1039	1057.9	-20.978	-46.315	-126.4	72.737
200	57.422	-0.75394	-21.538	-17.986	-47.844	1363.9	1686.2	1639	-13.682	-38.068	-119.38	73.473
200.5	57.948	-2.7197	-15.785	-19.624	-44.257	1891.9	2479.6	2336.6	-10.079	-26.336	-104.57	75.655
201	54.379	4.5843	-10.899	-18.584	-42.129	1323.5	1871.6	1724.4	-13.667	-19.644	-95.362	77.064
201.5	51.057	15.395	-6.1786	-14.185	-40.486	760.21	1194.9	1072.2	-18.928	-19.749	-90.367	101.4
202	49.835	20.775	-7.5946	-11.113	-38.116	765.52	1207.5	1043.2	-27.344	-19.796	-88.243	87.653
202.5	50.987	21.713	-8.5772	-12.851	-47.653	678.58	1058.1	862.62	-29.179	-16.916	-85.788	-26.684
203	53.007	13.402	-8.1154	-22.271	-60.71	610.57	991.96	772.52	-20.419	-13.724	-87.439	-139.84
203.5	52.733	6.8651	-8.7971	-34.543	-62.972	665.26	1153.7	889.32	-9.8158	-17.029	-97.677	-208.36
204	50.361	8.0808	-7.3686	-40.716	-62.403	742.76	1298.3	1071.8	-9.7585	-24.033	-103.41	-157.87
204.5	48.814	14.494	6.0117	-27.411	-40.478	1363.7	2214.4	2027.7	-11.181	-33.825	-113.68	-33.272
205	53.828	26.435	24.136	-7.5464	-11.772	-351.23	3.7162	-230.08	-9.706	-35.766	-110.56	52.214
205.5	58.926	34.364	32.41	6.2475	2.1584	-18061	-24020	-24518	-6.177	-26.899	-97.851	68.816
206	63.041	32.772	29.569	10.251	4.4918	-1662.4	-2272	-2366.3	4.7783	-19.428	-78.785	80.145
206.5	63.843	27.834	20.472	0.73271	-2.4488	655.42	865.12	791.58	15.439	-9.0688	-62.669	87.381
207	57.025	20.757	7.8645	-11.777	-11.078	526.4	758.24	625.06	21.303	-8.7436	-66.942	69.859
207.5	47.981	14.607	-1.2006	-17.855	-18.57	673.04	1020.9	813	23.028	-9.8918	-75.812	73.545
208	46.828	19.958	7.5009	-6.7368	-13.483	1015.7	1478.8	1242.3	20.754	-3.9598	-83.083	89.923
208.5	44.615	23.565	13.427	0.42554	-7.7344	-1107.8	-1675.5	-1645.4	16.074	-3.9671	-88.345	76.798
209	38.18	20.717	10.872	-7.0024	-15.076	-1243.1	-1870.7	-1778.7	11.945	0.069963	-75.249	72.49
209.5	37.492	19.615	6.9249	-23.129	-20.442	1114.5	1611.3	1469.2	7.4812	5.7793	-57.795	70.401
210	37.641	10.578	-3.7176	-48.58	-26.992	1828.9	2754.3	2526.8	11.309	9.3319	-49.049	62.009
210.5	37.996	-3.4439	-11.854	-49.683	-36.013	3201.8	4797	4553.1	16.632	7.3753	-51.057	55.998
211	41.519	-9.6855	-17.359	-33.764	-31.901	-444.38	-519.98	-730.8	17.596	0.24485	-67.987	56.631
211.5	40.307	-16.014	-19.727	-22.446	-30.178	-4091.6	-5778.2	-5920.1	19.13	-9.5336	-86.495	64.158
212	34.073	-22.128	-23.184	-20.899	-38.692	-2610.5	-3616.6	-3655.4	12.404	-19.522	-103.22	63.364
212.5	37.16	-17.344	-18.162	-25.111	-39.033	-1994.7	-2677.1	-2747.4	5.3233	-18.644	-106.45	74.971
213	46.904	-10.221	-6.2795	-25.757	-37.025	-1719.6	-2234.9	-2358	2.6833	-16.088	-93.331	76.404
213.5	51.325	-0.67185	1.6243	-23.758	-34.677	-1304.7	-1676.9	-1821.6	1.1148	-19.551	-88.384	75.095
214	56.447	9.2339	5.8947	-16.959	-29.729	-1126.9	-1542.8	-1639.2	6.4978	-20.726	-82.826	105.68
214.5	58.906	14.461	4.8012	-13.105	-30.678	-926.85	-1381.3	-1366.9	8.0288	-15.682	-68.613	107.8
215	54.515	17.504	4.5188	-10.813	-31.092	-816.89	-1329	-1218.4	4.8219	-7.3864	-62.037	87.005
215.5	50.975	14.449	8.1332	-11.971	-31.922	-790.53	-1384.2	-1227	4.0951	1.5367	-56.205	63.048
216	42.297	8.9263	5.3922	-21.558	-37.645	-573.43	-1076.5	-981.59	3.8794	4.8561	-53.155	40.339
216.5	30.65	1.5928	-6.5009	-34.94	-44.846	-374.32	-724.25	-674.13	5.1649	-2.1503	-60.128	32.591
217	22.374	-7.2668	-14.548	-43.241	-51.246	-297.82	-572.88	-546.53	10.921	-11.466	-68.512	40.021
217.5	19.904	-8.5145	-25.381	-44.744	-55.348	-266.62	-501.83	-479.79	18.125	-19.779	-80.614	52.312
218	28.899	-4.5027	-27.28	-36.017	-53.753	-230.54	-413.11	-377.66	21.066	-23.24	-92.397	63.381
218.5	43.105	1.0881	-12.894	-20.904	-43.31	-260.54	-425.78	-371.6	20.994	-20.009	-98.741	66.577
219	52.687	9.158	-5.758	-17.141	-33.244	-273.03	-412.99	-343.96	20.355	-14.589	-99.525	59.579
219.5	58.534	12.399	1.4952	-15.399	-22.517	-297.14	-427.88	-355.12	14.618	-6.2633	-86.148	52.937
220	60.737	14.2	10.86	-9.5705	-10.719	-383.87	-536.88	-477.81	7.037	-3.1645	-72.434	52.256
220.5	56.79	14.996	14.345	-4.5055	-4.7302	-350.48	-486.91	-468.35	2.4806	-2.5914	-63.376	57.148
221	53.615	13.604	13.164	2.2607	-5.5035	-325.32	-461.73	-459.75	-1.5984	-0.49013	-53.26	65.265
221.5	53.034	12.887	9.945	6.1892	-8.1169	-316.78	-448.67	-449.76	1.3833	-3.1056	-49.675	67.717
222	50.668	11.954	4.7263	2.6612	-16.049	-337.54	-469.53	-453.51	11.576	-3.0279	-47.942	65.861
222.5	51.869	10.124	-2.1116	-6.7284	-27.394	-447.6	-612.11	-584	20.774	0.13367	-49.751	57.237
223	58.418	9.941	-2.3386	-15.678	-31.561	-420.71	-565.92	-559.44	25.961	-0.654	-56.011	45.547
223.5	61.991	12.296	-1.8467	-16.816	-34.679	-344.7	-448.68	-470.51	28.9	-0.009328	-61.869	41.043
224	61.029	14.473	-1.1084	-10.827	-25.885	-283.74	-350.89	-396.4	24.406	-0.23223	-67.254	35.329
224.5	58.669	14.967	-0.72145	-7.8563	-12.844	-272.31	-321.71	-365.36	13.628	-2.2145	-63.824	34.127
225	55.19	15.533	-2.4577	-5.3659	-5.2877	-321.3	-362.19	-400.39	3.1217	-2.1556	-54.151	36.815
225.5	54.431	13.727	2.979	-1.9631	1.6304	-327.9	-367.4	-394.91	-0.49139	1.0359	-43.174	28.371
226	53.193	10.332	11.448	0.21242	5.2469	-240.65	-276.28	-289.42	3.4731	3.6855	-35.518	30.33
226.5	52.03	9.9066	16.986	1.9444	4.6332	-144.91	-168.92	-186.97	9.7007	3.4266	-36.197	55.969
227	52.123	10.801	22.227	4.3679	5.5128	-82.176	-101.61	-122.73	17.165	4.0131	-40.291	70.333
227.5	49.616	11.48	20.801	2.4366	4.218	-49.065	-68.158	-90.882	20.105	1.9654	-45.242	76.704
228	50.324	11.204	14.927	-0.81577	2.2934	-37.758	-61.294	-85.515	20.818	0.72744	-45.275	79.037
228.5	49.958	13.492	13.859	2.7559	3.5964	-34.075	-69.432	-87.34	25.122	4.7285	-35.52	71.465
229	49.24	17.142	14.481	6.7624	4.7374	-29.746	-73.41	-82.975	27.779	7.2818	-28.178	70.269
229.5	48.064	21.48	16.171	12.848	6.7809	-23.831	-68.521	-71.974	27.985	10.061	-21.22	67.213
230	44.845	25.795	18.234	18.817	9.1947	-14.727	-55.612	-54.108	27.641	13.196	-13.03	63.605
230.5	42.969	26.786	16.994	19.297	11.57	-6.3686	-42.707	-37.632	25.35	16.26	-6.9397	64.318
231	40.649	26.68	15.306	19.693	12.591	-1.6167	-31.523	-26.979	25.647	19.056	-1.3237	62.98
231.5	39.896	25.088	13.94	18.641	13.11	2.2633	-21.136	-18.347	27.896	21.525	2.8985	63.13
232	40.187	24.404	15.046	18.61	13.525	5.9477	-11.06	-10.724	30.068	23.671	5.4672	62.733
232.5	40.71	25.251	17.615	20.786	15.682	9.9233	-2.171	-4.8375	32.746	24.707	7.4083	63.674
233	41.825	24.66	19.265	20.725	18.925	13.468	4.4082	1.1361	34.251	25.625	10.141	65.013
233.5	41.967	24.428	21.383	21.093	20.663	16.488	8.8368	6.4378	34.87	26.512	13.018	64.014
234	41.556	24.229	22.447	21.632	20.83	18.628	11.472	10.024	35.28	27.084	15.081	62.813
234.5	41.015	24.14	23.319	22.811	21.373	19.25	13.317	12.813	35.331	27.887	16.761	61.074
235	40.771	25.247	24.65	24.701	22.592	19.853	14.824	15.337	35.558	28.809	18.066	59.951
235.5	40.421	25.346	24.687	25.369	23.759	20.451	16.06	17.381	36.183	29.604	19.15	60.404
236	40.022	25.19	24.247	25.09	25.089	20.865	16.933	19.007	36.948	30.229	20.183	61.8
236.5	39.489	25.234	24.549	25.195	25.849	21.436	17.666	19.913	37.294	30.412	20.975	61.68
237	38.62	25.047	24.909	25.628	25.922	21.912	18.355	20.578	37.243	30.589	21.493	60.818
237.5	37.83	25.112	25.209	26.201	26.002	22.476	19.218	21.211	36.829	30.678	22.038	60.263
238	37.004	24.829	25.263	26.433	25.985	23.252	20.397	21.926	36.347	30.802	22.549	58.92
238.5	36.419	24.182	24.886	26.14	25.741	23.901	21.114	22.353	36.359	31.151	23.074	58.192
239	36.093	23.73	24.485	26.026	25.469	24.383	21.559	22.482	36.51	31.332	23.635	58.339
239.5	36.085	23.634	24.179	25.981	25.2	24.465	21.825	22.443	36.462	31.406	24.092	58.399
240	36.156	23.763	24.112	26.15	25.056	24.157	21.943	22.351	36.175	31.333	24.378	58.516
240.5	35.982	23.908	24.209	26.287	25.145	23.952	21.931	22.198	35.667	31.157	24.551	58.866
241	35.604	24.073	24.289	26.168	25.185	23.848	21.986	22.064	35.261	31.009	24.65	59.005
241.5	35.139	24.085	24.352	25.938	25.271	23.809	22.012	21.989	35.091	30.831	24.666	59.035
242	34.74	24.022	24.437	25.794	25.328	23.833	21.855	21.856	34.961	30.855	24.824	59.019
242.5	34.475	23.851	24.321	25.496	25.059	23.704	21.757	21.702	34.823	30.838	24.928	58.79
243	34.304	23.433	24.048	25.225	24.945	23.522	21.669	21.604	34.618	30.865	25.036	58.395
243.5	34.044	23.001	23.851	25.095	24.945	23.392	21.572	21.507	34.361	31.071	25.184	57.932
244	33.751	22.657	23.657	24.828	24.951	23.365	21.492	21.474	34.158	31.227	25.273	57.537
244.5	33.517	22.372	23.448	24.667	24.976	23.28	21.32	21.432	33.964	31.429	25.368	57.151
245	33.304	22.141	23.305	24.502	24.827	23.148	21.13	21.272	33.793	31.603	25.469	56.484
245.5	33.074	21.87	23.136	24.329	24.525	23.021	20.958	21.11	33.694	31.662	25.614	55.836
246	32.822	21.576	22.914	24.194	24.129	22.856	20.862	21.007	33.678	31.677	25.77	55.623
246.5	32.508	21.297	22.783	24.081	23.772	22.704	20.81	21.003	33.661	31.706	25.925	55.337
247	32.284	21.044	22.675	23.963	23.506	22.593	20.747	21.097	33.594	31.711	26.035	55.239
247.5	32.105	20.856	22.514	23.837	23.391	22.473	20.67	21.167	33.397	31.723	26.027	55.086
248	31.825	20.746	22.317	23.665	23.38	22.403	20.638	21.167	33.162	31.776	25.965	54.597
248.5	31.584	20.669	22.058	23.425	23.369	22.328	20.614	21.071	33.051	31.754	25.939	54.141
249	31.258	20.607	21.825	23.172	23.302	22.16	20.564	20.917	32.947	31.744	25.908	53.822
249.5	30.984	20.584	21.758	22.982	23.196	21.937	20.47	20.757	32.885	31.781	25.927	53.715
250	30.858	20.472	21.754	22.865	23.052	21.705	20.277	20.585	32.763	31.713	25.947	53.548
250.5	30.81	20.314	21.717	22.773	22.877	21.543	20.099	20.481	32.525	31.66	25.935	53.335
251	30.776	20.196	21.67	22.745	22.741	21.476	19.989	20.424	32.349	31.615	25.952	53.108
251.5	30.667	20.106	21.49	22.681	22.654	21.482	19.977	20.375	32.218	31.561	25.979	52.926
252	30.62	20.055	21.384	22.638	22.629	21.499	20.038	20.366	32.076	31.611	25.956	52.951
252.5	30.482	20.005	21.394	22.609	22.662	21.514	20.04	20.343	31.939	31.659	25.909	52.827
253	30.332	19.968	21.426	22.594	22.696	21.488	19.968	20.288	31.765	31.657	25.855	52.57
253.5	30.207	19.916	21.511	22.651	22.678	21.415	19.846	20.237	31.571	31.595	25.794	52.247
254	29.993	19.838	21.493	22.654	22.646	21.335	19.78	20.156	31.412	31.475	25.763	52.022
254.5	29.843	19.742	21.392	22.539	22.587	21.259	19.756	20.1	31.285	31.377	25.7	52.231
255	29.836	19.653	21.25	22.368	22.512	21.23	19.777	20.088	31.176	31.354	25.603	52.507
255.5	29.857	19.636	21.112	22.196	22.42	21.187	19.761	20.071	31.023	31.354	25.533	52.62
256	29.841	19.633	21.044	22.018	22.298	21.15	19.678	20.041	30.888	31.37	25.506	52.516
256.5	29.701	19.673	21.056	21.919	22.232	21.094	19.585	19.989	30.737	31.397	25.479	52.147
257	29.441	19.652	21.068	21.86	22.257	20.99	19.483	19.922	30.537	31.336	25.427	51.698
257.5	29.216	19.529	21.06	21.767	22.298	20.944	19.417	19.876	30.406	31.245	25.366	51.326
258	29.111	19.471	21.07	21.771	22.329	20.863	19.385	19.843	30.322	31.118	25.289	50.946
258.5	29.097	19.418	21.008	21.783	22.284	20.782	19.383	19.792	30.245	30.95	25.292	50.668
259	29.063	19.339	20.96	21.723	22.083	20.747	19.413	19.698	30.194	30.789	25.279	50.641
259.5	29.115	19.344	20.963	21.697	22	20.731	19.473	19.58	30.157	30.623	25.176	50.707
260	29.18	19.353	20.966	21.687	21.989	20.735	19.523	19.508	30.017	30.482	25.093	50.723
260.5	29.2	19.325	20.957	21.671	21.933	20.753	19.556	19.496	29.879	30.339	24.935	50.733
261	29.256	19.319	20.92	21.732	21.931	20.756	19.531	19.528	29.711	30.243	24.814	50.703
261.5	29.213	19.261	20.874	21.745	21.864	20.667	19.401	19.526	29.513	30.162	24.765	50.51
262	29.129	19.189	20.828	21.706	21.758	20.571	19.249	19.489	29.329	30.096	24.689	50.559
262.5	29.075	19.164	20.787	21.677	21.698	20.481	19.092	19.423	29.093	30.054	24.663	50.43
263	29.006	19.169	20.763	21.576	21.613	20.454	19.037	19.369	28.937	30.021	24.673	50.106
263.5	28.926	19.146	20.737	21.451	21.495	20.491	19.099	19.371	28.811	30.039	24.663	49.937
264	28.883	19.111	20.693	21.356	21.427	20.521	19.183	19.365	28.768	30.028	24.6	49.599
264.5	28.915	19.087	20.703	21.326	21.435	20.533	19.266	19.322	28.77	29.965	24.506	49.402
265	28.896	19.037	20.731	21.35	21.499	20.452	19.287	19.311	28.71	29.86	24.352	49.305
265.5	28.92	19.041	20.762	21.379	21.568	20.365	19.263	19.315	28.611	29.681	24.212	49.26
266	28.885	19.12	20.785	21.369	21.578	20.287	19.234	19.315	28.443	29.492	24.122	49.29
266.5	28.799	19.255	20.8	21.415	21.569	20.207	19.211	19.297	28.284	29.379	24.014	49.309
267	28.846	19.359	20.838	21.465	21.566	20.188	19.148	19.248	28.143	29.301	23.986	49.422
267.5	28.857	19.371	20.889	21.543	21.53	20.21	19.102	19.221	28.012	29.259	23.946	49.486
268	28.802	19.328	20.945	21.588	21.539	20.237	19.059	19.233	27.903	29.202	23.887	49.593
268.5	28.755	19.276	21.009	21.485	21.652	20.297	19.065	19.275	27.84	29.112	23.847	49.706
269	28.691	19.278	21	21.398	21.721	20.313	19.106	19.306	27.743	29.042	23.757	49.591
269.5	28.687	19.325	20.938	21.322	21.77	20.286	19.145	19.289	27.67	28.954	23.72	49.382
270	28.808	19.354	20.846	21.303	21.772	20.296	19.184	19.234	27.615	28.892	23.693	49.283
270.5	28.929	19.38	20.762	21.416	21.683	20.363	19.188	19.218	27.489	28.847	23.646	49.205
271	28.98	19.446	20.707	21.513	21.693	20.456	19.199	19.218	27.395	28.815	23.591	49.16
271.5	28.946	19.512	20.665	21.578	21.799	20.566	19.224	19.237	27.303	28.835	23.512	49.068
272	28.899	19.512	20.663	21.646	21.884	20.611	19.286	19.312	27.17	28.841	23.419	48.842
272.5	28.866	19.487	20.741	21.631	21.961	20.553	19.342	19.32	27.099	28.787	23.322	48.565
273	28.87	19.451	20.875	21.517	21.926	20.478	19.378	19.277	27.074	28.696	23.247	48.466
273.5	28.953	19.436	20.998	21.375	21.762	20.419	19.401	19.236	27.003	28.588	23.154	48.532
274	29.031	19.507	21.123	21.284	21.734	20.406	19.339	19.167	26.956	28.513	23.161	48.459
274.5	29.051	19.53	21.168	21.214	21.741	20.421	19.305	19.155	26.891	28.445	23.189	48.37
275	29.04	19.537	21.159	21.295	21.784	20.438	19.297	19.187	26.752	28.347	23.16	48.119
275.5	28.97	19.535	21.128	21.439	21.861	20.418	19.287	19.218	26.618	28.23	23.103	47.897
276	28.899	19.54	21.024	21.505	21.835	20.401	19.302	19.283	26.515	28.171	23.041	47.841
276.5	28.936	19.599	20.979	21.563	21.77	20.394	19.271	19.315	26.405	28.114	23.009	47.887
277	29.059	19.606	20.984	21.568	21.742	20.367	19.194	19.304	26.367	28.024	22.99	48.014
277.5	29.16	19.531	20.97	21.503	21.718	20.361	19.153	19.308	26.351	27.951	22.925	47.931
278	29.169	19.488	20.984	21.499	21.696	20.407	19.134	19.305	26.367	27.859	22.803	47.869
278.5	29.104	19.504	20.973	21.52	21.672	20.448	19.139	19.341	26.37	27.811	22.643	47.75
279	28.914	19.525	20.91	21.512	21.619	20.453	19.144	19.4	26.267	27.793	22.556	47.669
279.5	28.742	19.6	20.935	21.518	21.632	20.399	19.103	19.361	26.216	27.768	22.565	47.657
280	28.694	19.643	21.018	21.506	21.651	20.28	19.063	19.276	26.13	27.754	22.586	47.452
280.5	28.699	19.628	21.045	21.483	21.704	20.155	19.044	19.159	26.075	27.701	22.586	47.224
281	28.779	19.663	21.094	21.513	21.76	20.14	19.073	19.039	26.051	27.627	22.547	46.998
281.5	28.915	19.676	21.117	21.571	21.78	20.138	19.068	18.907	25.939	27.528	22.492	46.854
282	28.942	19.676	21.127	21.601	21.818	20.133	19.008	18.775	25.788	27.342	22.377	46.95
282.5	28.891	19.638	21.1	21.537	21.805	20.148	18.917	18.713	25.68	27.189	22.25	47.308
283	28.953	19.649	21.115	21.536	21.811	20.15	18.864	18.718	25.578	27.125	22.168	47.605
283.5	28.943	19.663	21.14	21.518	21.8	20.12	18.866	18.766	25.503	27.083	22.071	47.821
284	28.916	19.594	21.119	21.402	21.75	20.067	18.929	18.849	25.404	27.089	22.036	47.951
284.5	29.012	19.54	21.144	21.365	21.691	20.027	18.951	18.854	25.273	27.096	22.067	47.869
285	28.952	19.389	21.057	21.258	21.571	19.964	18.901	18.842	25.177	27.035	22.043	47.725
285.5	28.9	19.26	20.977	21.195	21.478	19.888	18.817	18.832	25.069	26.939	22.024	47.597
286	28.809	19.241	20.879	21.234	21.418	19.821	18.713	18.824	24.971	26.849	21.979	47.501
286.5	28.563	19.248	20.78	21.156	21.408	19.76	18.706	18.803	24.928	26.742	21.837	47.596
287	28.276	19.287	20.753	21.068	21.394	19.748	18.745	18.805	24.899	26.655	21.704	47.843
287.5	28.043	19.297	20.729	20.895	21.382	19.775	18.759	18.801	24.927	26.559	21.62	47.872
288	27.88	19.142	20.685	20.698	21.333	19.803	18.671	18.706	24.939	26.494	21.604	47.713
288.5	27.72	18.924	20.577	20.616	21.183	19.768	18.533	18.573	24.907	26.46	21.67	47.474
289	27.634	18.72	20.449	20.524	21.076	19.688	18.358	18.407	24.828	26.434	21.699	47.072
289.5	27.59	18.573	20.294	20.499	20.962	19.612	18.214	18.271	24.724	26.438	21.675	46.899
290	27.55	18.527	20.162	20.513	20.83	19.507	18.152	18.242	24.675	26.443	21.619	46.977
290.5	27.528	18.475	20.024	20.44	20.737	19.372	18.086	18.264	24.654	26.434	21.552	47.067
291	27.466	18.392	19.88	20.284	20.617	19.243	18.008	18.292	24.645	26.407	21.479	47.269
291.5	27.414	18.308	19.72	20.23	20.529	19.155	17.969	18.257	24.662	26.406	21.436	47.324
292	27.339	18.261	19.609	20.228	20.479	19.112	17.956	18.201	24.677	26.42	21.453	47.132
292.5	27.351	18.276	19.62	20.297	20.494	19.098	17.981	18.122	24.703	26.443	21.494	47.004
293	27.258	18.2	19.59	20.358	20.458	19.077	18.024	18.063	24.767	26.477	21.633	46.899
293.5	27.083	18.04	19.547	20.317	20.409	19.019	18.035	18.063	24.784	26.449	21.734	46.959
294	26.945	17.83	19.457	20.181	20.31	18.956	18.025	18.051	24.752	26.43	21.821	47.138
294.5	26.797	17.626	19.316	20.031	20.213	18.911	17.969	18.022	24.724	26.484	21.946	47.241
295	26.827	17.528	19.208	20.006	20.161	18.857	17.865	17.966	24.744	26.577	21.955	47.214
295.5	26.883	17.519	19.175	20.034	20.121	18.823	17.736	17.911	24.79	26.624	21.887	47.07
296	26.969	17.601	19.221	20.118	20.173	18.766	17.585	17.887	24.84	26.607	21.755	47.05
296.5	27.02	17.717	19.28	20.203	20.242	18.691	17.472	17.907	24.861	26.595	21.559	46.958
297	27.041	17.865	19.471	20.286	20.367	18.696	17.466	17.953	24.83	26.603	21.516	46.915
297.5	27.024	17.964	19.608	20.317	20.441	18.724	17.537	17.989	24.781	26.675	21.604	46.683
298	26.96	17.938	19.615	20.253	20.402	18.775	17.631	18.006	24.732	26.724	21.705	46.234
298.5	26.983	17.887	19.557	20.199	20.336	18.836	17.692	18.022	24.686	26.7	21.789	45.809
299	27.028	17.79	19.389	20.055	20.207	18.847	17.704	18.008	24.641	26.591	21.743	45.67
299.5	27.085	17.724	19.229	19.921	20.126	18.82	17.674	17.974	24.626	26.443	21.621	45.959
300	27.095	17.764	19.225	19.974	20.152	18.837	17.64	17.921	24.583	26.362	21.511	46.343
300.5	26.988	17.732	19.225	20.034	20.186	18.863	17.611	17.855	24.526	26.31	21.437	46.666
301	26.878	17.664	19.251	20.145	20.175	18.856	17.585	17.807	24.483	26.31	21.434	46.69
301.5	26.759	17.599	19.242	20.244	20.118	18.806	17.55	17.833	24.441	26.309	21.446	46.374
302	26.742	17.559	19.211	20.257	20.072	18.698	17.537	17.866	24.35	26.219	21.417	45.984
302.5	26.783	17.639	19.247	20.242	20.127	18.58	17.555	17.922	24.214	26.077	21.34	45.722
303	26.888	17.74	19.273	20.177	20.255	18.503	17.604	18.03	24.037	25.962	21.239	45.508
303.5	26.937	17.689	19.318	20.077	20.344	18.488	17.597	18.072	23.892	25.929	21.205	45.276
304	26.916	17.617	19.332	19.952	20.409	18.484	17.557	18.092	23.866	25.966	21.233	45.182
304.5	26.836	17.508	19.203	19.792	20.332	18.478	17.485	18.097	23.9	25.973	21.235	45.225
305	26.757	17.508	19.226	19.764	20.285	18.453	17.374	17.97	23.909	25.969	21.215	45.29
305.5	26.783	17.528	19.275	19.762	20.188	18.46	17.335	17.902	23.92	25.912	21.149	45.386
306	26.836	17.507	19.276	19.723	20.068	18.493	17.353	17.893	23.9	25.845	21.051	45.4
306.5	26.846	17.499	19.288	19.743	20.031	18.539	17.403	17.944	23.85	25.825	21.033	45.394
307	26.826	17.537	19.232	19.734	20.062	18.563	17.409	17.981	23.796	25.753	21.032	45.357
307.5	26.807	17.615	19.199	19.751	20.209	18.509	17.364	17.986	23.688	25.662	21.002	45.085
308	26.818	17.706	19.246	19.79	20.29	18.396	17.272	17.973	23.586	25.538	20.948	44.847
308.5	26.867	17.712	19.292	19.8	20.221	18.309	17.156	17.892	23.487	25.457	20.878	44.774
309	26.859	17.602	19.252	19.739	20.059	18.279	17.102	17.844	23.395	25.405	20.796	45.04
309.5	26.809	17.446	19.194	19.645	19.825	18.332	17.1	17.815	23.345	25.383	20.758	45.52
310	26.727	17.354	19.195	19.639	19.7	18.392	17.141	17.779	23.294	25.383	20.773	45.541
310.5	26.645	17.325	19.308	19.657	19.715	18.38	17.177	17.776	23.282	25.404	20.795	45.447
311	26.627	17.277	19.38	19.64	19.714	18.317	17.201	17.787	23.279	25.477	20.855	45.273
311.5	26.612	17.233	19.384	19.673	19.75	18.258	17.201	17.768	23.222	25.523	20.861	45.215
312	26.552	17.185	19.356	19.712	19.777	18.239	17.175	17.765	23.181	25.532	20.79	45.329
312.5	26.466	17.208	19.236	19.739	19.769	18.244	17.131	17.733	23.097	25.442	20.691	45.357
313	26.447	17.299	19.204	19.808	19.801	18.265	17.068	17.722	23.08	25.285	20.547	45.195
313.5	26.437	17.429	19.171	19.885	19.858	18.297	17.009	17.792	23.089	25.151	20.467	44.897
314	26.443	17.503	19.072	19.873	19.914	18.319	16.967	17.847	23.117	25.071	20.441	44.722
314.5	26.479	17.554	19.02	19.87	19.97	18.344	16.967	17.892	23.123	25.012	20.376	44.401
315	26.547	17.578	18.957	19.911	20.052	18.351	16.928	17.835	23.031	25.013	20.317	44.097
315.5	26.608	17.558	18.886	19.942	20.054	18.335	16.887	17.732	22.898	25.034	20.258	44.013
316	26.681	17.546	18.855	19.983	19.962	18.272	16.877	17.66	22.749	24.981	20.167	43.872
316.5	26.691	17.465	18.845	19.961	19.802	18.213	16.894	17.676	22.699	24.97	20.165	44.04
317	26.5	17.406	18.812	19.805	19.603	18.16	16.945	17.681	22.694	24.886	20.157	44.186
317.5	26.381	17.313	18.814	19.638	19.47	18.085	17.02	17.644	22.692	24.721	20.176	44.048
318	26.289	17.134	18.734	19.474	19.431	18.076	17.049	17.52	22.672	24.566	20.196	43.869
318.5	26.32	17.027	18.602	19.394	19.447	18.107	17.033	17.46	22.633	24.416	20.196	43.904
319	26.537	16.985	18.511	19.426	19.528	18.15	17.03	17.465	22.584	24.345	20.176	44.231
319.5	26.773	16.986	18.534	19.557	19.643	18.211	17.038	17.539	22.55	24.369	20.049	44.625
320	26.947	17.042	18.584	19.663	19.767	18.219	17.047	17.587	22.533	24.456	19.962	44.506
320.5	26.866	17.149	18.62	19.667	19.855	18.158	17.022	17.569	22.456	24.536	19.875	44.033
321	26.557	17.216	18.61	19.592	19.802	18.079	16.927	17.54	22.39	24.547	19.834	43.252
321.5	26.288	17.293	18.55	19.476	19.649	18.026	16.846	17.575	22.333	24.543	19.866	42.723
322	26.074	17.28	18.541	19.514	19.469	18.006	16.828	17.617	22.238	24.542	19.844	42.538
322.5	26.124	17.21	18.588	19.652	19.426	18.014	16.843	17.656	22.194	24.513	19.758	42.49
323	26.24	17.184	18.731	19.758	19.496	17.984	16.86	17.645	22.181	24.498	19.68	42.618
323.5	26.299	17.219	18.86	19.839	19.545	17.958	16.874	17.592	22.212	24.427	19.574	42.624
324	26.371	17.288	18.858	19.803	19.626	17.955	16.858	17.56	22.238	24.379	19.506	42.523
324.5	26.308	17.329	18.878	19.713	19.638	18.038	16.924	17.549	22.179	24.338	19.553	42.375
325	26.282	17.356	18.842	19.606	19.637	18.105	16.956	17.529	22.034	24.246	19.58	42.309
325.5	26.253	17.346	18.934	19.519	19.774	18.112	16.966	17.499	21.923	24.184	19.597	42.354
326	26.281	17.37	19.147	19.554	19.886	18.083	16.952	17.507	21.869	24.127	19.592	42.509
326.5	26.282	17.373	19.242	19.668	19.945	18.07	16.939	17.543	21.892	24.11	19.55	42.615
327	26.246	17.355	19.176	19.82	19.901	18.076	16.925	17.595	21.912	24.117	19.494	42.656
327.5	26.117	17.174	18.927	19.86	19.714	18.135	16.865	17.667	21.798	24.063	19.445	42.657
328	26.069	16.954	18.678	19.858	19.557	18.173	16.826	17.67	21.729	24.016	19.352	42.586
328.5	26.064	16.781	18.528	19.838	19.54	18.107	16.773	17.598	21.682	24.018	19.229	42.458
329	26.052	16.712	18.513	19.691	19.605	18.033	16.749	17.481	21.601	24.014	19.136	42.387
329.5	26.127	16.776	18.557	19.555	19.616	17.983	16.763	17.381	21.608	23.991	19.078	42.554
330	26.03	16.834	18.592	19.394	19.525	17.938	16.768	17.292	21.608	23.89	19.043	42.639
330.5	25.966	16.847	18.557	19.244	19.304	17.98	16.808	17.303	21.623	23.769	19.046	42.708
331	26.03	16.841	18.476	19.235	19.13	18.012	16.842	17.349	21.6	23.683	19.061	42.65
331.5	26.077	16.923	18.486	19.267	19.144	18.031	16.856	17.365	21.527	23.65	19.033	42.428
332	26.229	17.045	18.507	19.207	19.279	18.048	16.82	17.343	21.428	23.67	19.006	42.2
332.5	26.315	17.131	18.643	19.285	19.577	18.029	16.717	17.279	21.408	23.705	18.957	42.009
333	26.209	17.137	18.729	19.341	19.769	18.002	16.639	17.295	21.399	23.742	18.925	41.91
333.5	26.016	17.062	18.653	19.367	19.801	17.938	16.603	17.412	21.36	23.696	18.942	41.71
334	25.821	16.949	18.582	19.465	19.7	17.854	16.708	17.535	21.336	23.65	18.982	41.578
334.5	25.677	16.877	18.493	19.345	19.429	17.758	16.76	17.57	21.253	23.635	18.963	41.449
335	25.628	16.902	18.462	19.219	19.21	17.662	16.727	17.52	21.186	23.589	18.892	41.218
335.5	25.698	16.985	18.462	19.236	19.07	17.639	16.697	17.466	21.217	23.543	18.822	41.191
336	25.88	17.052	18.505	19.225	19.074	17.67	16.736	17.5	21.19	23.432	18.737	41.144
336.5	26.04	17.016	18.528	19.256	19.173	17.727	16.861	17.6	21.163	23.329	18.675	41.095
337	26.129	16.987	18.53	19.24	19.269	17.722	16.909	17.554	21.083	23.311	18.675	41.033
337.5	26.131	16.941	18.445	19.131	19.347	17.659	16.918	17.396	21.018	23.307	18.597	41.047
338	26.145	16.895	18.266	19.077	19.377	17.529	16.837	17.16	21.028	23.269	18.511	41.029
338.5	26.226	16.904	18.129	19.076	19.433	17.464	16.735	16.983	21.101	23.234	18.509	40.89
339	26.389	16.835	18.081	19.069	19.375	17.431	16.702	16.969	21.159	23.202	18.497	40.859
339.5	26.553	16.676	18.121	19.077	19.291	17.41	16.637	17.066	21.091	23.202	18.605	40.879
340	26.508	16.561	18.217	19.063	19.227	17.431	16.535	17.124	21.006	23.215	18.711	41.082
340.5	26.421	16.477	18.35	19.024	19.155	17.489	16.435	17.188	20.898	23.188	18.696	41.322
341	26.327	16.464	18.504	19.079	19.195	17.571	16.339	17.19	20.817	23.2	18.614	41.324
341.5	26.17	16.543	18.633	19.072	19.194	17.634	16.345	17.179	20.756	23.172	18.513	41.051
342	25.934	16.529	18.628	19.091	19.158	17.651	16.37	17.219	20.735	23.159	18.41	40.761
342.5	25.84	16.537	18.579	19.12	19.178	17.648	16.374	17.267	20.742	23.19	18.411	40.672
343	25.894	16.535	18.522	19.058	19.102	17.651	16.319	17.303	20.75	23.113	18.468	41.032
343.5	26.074	16.616	18.476	19.093	19.04	17.655	16.259	17.355	20.735	23.079	18.452	41.526
344	26.332	16.675	18.419	19.028	19.081	17.617	16.258	17.385	20.651	23.073	18.488	41.974
344.5	26.323	16.638	18.303	19.001	19.157	17.571	16.372	17.419	20.533	23.045	18.433	42.122
345	26.192	16.658	18.244	18.995	19.316	17.581	16.497	17.458	20.458	23.153	18.291	42.085
345.5	26.029	16.634	18.27	18.977	19.411	17.652	16.597	17.456	20.398	23.224	18.171	41.904
346	26.097	16.741	18.359	19.041	19.445	17.787	16.564	17.403	20.418	23.227	18.024	41.936
346.5	26.187	16.741	18.459	19.011	19.499	17.805	16.475	17.3	20.501	23.148	17.911	41.768
347	26.22	16.671	18.445	18.939	19.561	17.757	16.434	17.231	20.626	22.914	17.862	41.711
347.5	26.291	16.665	18.352	18.86	19.591	17.746	16.526	17.251	20.677	22.731	17.839	41.821
348	26.146	16.566	18.308	18.795	19.47	17.764	16.671	17.29	20.605	22.659	17.842	41.652
348.5	26.011	16.507	18.19	18.775	19.297	17.808	16.775	17.339	20.494	22.634	17.87	41.796
349	25.946	16.451	18.101	18.816	19.168	17.821	16.689	17.3	20.301	22.646	17.91	41.657
349.5	25.81	16.377	18.099	18.915	19.092	17.802	16.564	17.248	20.237	22.625	17.963	41.369
350	25.813	16.361	18.156	19.053	19.155	17.829	16.47	17.223	20.215	22.578	18.018	41.141
350.5	25.824	16.246	18.119	19.057	19.185	17.868	16.434	17.228	20.212	22.527	18.058	41.266
351	25.862	16.177	18.092	19.049	19.104	17.9	16.408	17.269	20.198	22.506	18.001	41.542
351.5	26.02	16.26	18.064	19.007	19.165	17.871	16.31	17.279	20.154	22.459	17.969	41.782
352	26.184	16.431	17.993	18.97	19.184	17.733	16.097	17.256	20.143	22.389	17.993	41.911
352.5	26.193	16.556	18.084	18.945	19.183	17.574	15.984	17.182	20.115	22.348	17.994	41.769
353	26.041	16.558	18.182	18.839	19.167	17.433	15.916	17.078	20.077	22.389	18.005	41.587
353.5	25.849	16.443	18.211	18.71	18.984	17.345	15.929	16.944	20.043	22.439	17.896	41.72
354	25.586	16.406	18.163	18.579	18.769	17.341	15.945	16.809	19.924	22.454	17.695	41.842
354.5	25.5	16.431	18.067	18.414	18.615	17.377	15.847	16.7	19.84	22.454	17.653	41.936
355	25.723	16.401	17.927	18.258	18.536	17.406	15.764	16.698	19.762	22.299	17.625	42.237
355.5	25.863	16.274	17.915	18.034	18.534	17.392	15.782	16.751	19.77	22.29	17.648	42.205
356	25.926	16.234	18.045	17.92	18.591	17.328	15.9	16.787	19.825	22.306	17.705	42.14
356.5	25.892	16.334	18.106	18.047	18.633	17.341	16.116	16.813	19.806	22.333	17.688	42.074
357	25.643	16.465	18.21	18.213	18.665	17.304	16.236	16.751	19.716	22.3	17.727	42.2
357.5	25.374	16.555	18.153	18.302	18.709	17.224	16.232	16.656	19.575	22.224	17.746	42.29
358	25.206	16.418	18.01	18.252	18.719	17.278	16.261	16.729	19.52	22.134	17.779	42.372
358.5	24.917	16.242	17.847	18.147	18.574	17.343	16.337	16.854	19.452	22.098	17.821	42.149
359	24.747	16.189	17.793	18.15	18.356	17.411	16.434	16.984	19.424	22.096	17.777	41.724
359.5	24.927	16.273	17.994	18.337	18.231	17.448	16.462	16.972	19.292	22.123	17.73	41.323
360	25.074	16.33	18.193	18.439	18.229	17.351	16.405	16.912	19.16	22.192	17.7	40.889
360.5	25.266	16.398	18.306	18.51	18.298	17.246	16.311	16.865	19.115	22.228	17.726	40.562
361	25.332	16.472	18.206	18.462	18.261	17.335	16.279	16.896	19.056	22.208	17.838	40.881
361.5	25.274	16.558	18.076	18.317	18.162	17.469	16.234	16.929	19.096	22.174	17.874	41.286
362	25.225	16.657	18.092	18.243	17.977	17.621	16.117	16.976	19.171	22.05	17.787	41.655
362.5	25.343	16.74	18.353	18.24	18.039	17.655	15.979	17.032	19.246	21.876	17.58	41.743
363	25.449	16.69	18.599	18.221	18.097	17.588	15.877	17.077	19.29	21.787	17.477	41.387
363.5	25.496	16.673	18.72	18.348	18.132	17.494	15.863	17.015	19.222	21.591	17.446	41.028
364	25.512	16.664	18.591	18.376	18.12	17.412	15.862	16.764	19.117	21.521	17.512	41.13
364.5	25.382	16.644	18.367	18.219	18.127	17.279	15.847	16.505	19.037	21.533	17.586	41.491
365	25.24	16.634	18.155	18.086	18.155	17.168	15.806	16.289	18.95	21.548	17.665	41.651
365.5	25.197	16.613	18.035	17.921	18.221	17.089	15.821	16.314	18.923	21.626	17.684	41.753
366	25.155	16.632	18.023	17.811	18.243	17.05	15.877	16.434	18.839	21.652	17.688	41.579
366.5	25.242	16.633	18.08	17.938	18.256	17.166	15.888	16.563	18.766	21.634	17.696	41.605
367	25.351	16.659	18.112	18.076	18.324	17.264	15.88	16.706	18.722	21.593	17.623	42.045
367.5	25.463	16.783	18.287	18.212	18.428	17.287	15.82	16.816	18.703	21.547	17.693	42.389
368	25.503	16.91	18.37	18.307	18.392	17.315	15.722	16.847	18.715	21.477	17.777	42.34
368.5	25.467	17.038	18.343	18.269	18.247	17.363	15.701	16.789	18.729	21.407	17.807	42.196
369	25.507	17.117	18.365	18.127	18.153	17.438	15.752	16.692	18.814	21.329	17.817	42.245
369.5	25.819	17.041	18.317	18.088	18.167	17.59	15.901	16.563	18.899	21.281	17.712	42.544
370	25.949	16.982	18.398	18.133	18.251	17.666	16.084	16.48	18.976	21.232	17.623	43.24
370.5	25.956	16.918	18.618	18.398	18.422	17.729	16.257	16.547	19.062	21.205	17.627	43.37
371	25.712	16.924	18.82	18.766	18.487	17.739	16.091	16.644	19.143	21.27	17.709	42.947
371.5	25.485	16.885	18.946	18.987	18.508	17.696	15.903	16.667	19.165	21.338	17.803	42.357
372	25.348	16.707	18.871	19.007	18.472	17.658	15.759	16.729	19.227	21.45	17.855	41.907
372.5	25.388	16.599	18.817	18.886	18.362	17.512	15.652	16.504	19.16	21.51	17.936	42.276
373	25.528	16.57	18.728	18.822	18.352	17.399	15.696	16.353	18.998	21.532	17.969	42.783
373.5	25.625	16.628	18.74	18.876	18.5	17.347	15.771	16.348	18.959	21.61	17.97	43.205
374	25.881	16.799	18.718	18.948	18.687	17.257	15.799	16.34	18.926	21.574	17.877	43.192
374.5	26.085	16.833	18.567	18.954	18.781	17.24	15.839	16.381	18.866	21.51	17.804	43.059
375	26.118	16.803	18.517	18.908	18.778	17.267	15.883	16.393	18.84	21.435	17.873	43.151
375.5	26.183	16.81	18.581	18.959	18.724	17.316	15.943	16.405	18.803	21.233	17.878	43.306
376	26.034	16.729	18.421	18.849	18.642	17.337	16.004	16.422	18.897	21.096	17.856	43.334
376.5	25.822	16.662	18.358	18.75	18.83	17.251	15.976	16.387	19.124	20.993	17.71	43.081
377	25.564	16.64	18.313	18.632	19.002	17.101	15.888	16.35	19.259	20.905	17.423	42.825
377.5	25.487	16.477	18.406	18.503	19.072	16.932	15.743	16.338	19.314	20.812	17.251	42.616
378	25.598	16.438	18.662	18.588	18.974	16.954	15.705	16.405	19.313	20.779	17.207	42.345
378.5	25.896	16.466	18.743	18.723	18.74	17.01	15.694	16.542	19.258	20.832	17.382	42.292
379	26.016	16.429	18.802	18.904	18.689	17.075	15.661	16.707	19.209	20.919	17.614	42.216
379.5	25.905	16.519	18.974	19.133	19.064	17.06	15.63	16.766	19.203	21.082	17.853	42.133
380	25.927	16.445	19.011	19.303	19.45	17.044	15.602	16.874	19.214	21.096	17.941	42.2
380.5	25.971	16.246	18.98	19.348	19.818	17.015	15.653	16.899	19.327	21.063	17.913	42.302
381	26.376	16.142	18.733	19.155	19.84	16.954	15.739	16.753	19.471	21.052	17.918	42.529
381.5	26.747	16.134	18.541	19.097	19.494	16.933	15.765	16.582	19.57	20.987	17.915	42.765
382	26.958	16.119	18.516	19.063	19.085	16.872	15.682	16.317	19.591	20.973	17.821	43.206
382.5	26.88	16.13	18.491	19.063	18.661	16.918	15.444	16.12	19.563	20.906	17.704	43.386
383	26.598	16.13	18.536	19.112	18.446	17.048	15.188	16.056	19.554	20.869	17.603	43.873
383.5	26.377	15.92	18.614	19.118	18.497	17.183	15.021	16.095	19.601	20.917	17.577	44.198
384	26.21	15.897	18.795	19.114	18.79	17.228	14.974	16.144	19.644	20.884	17.652	43.907
384.5	26.303	16.041	18.971	19.122	19.038	17.188	15.018	16.149	19.687	20.971	17.786	43.593
385	26.426	16.129	18.977	19.05	19.147	17.05	15.06	16.122	19.692	21.042	17.915	42.878
385.5	26.426	16.285	18.87	18.917	19.205	16.991	15.042	16.165	19.75	21.101	17.99	42.67
386	26.392	16.189	18.64	18.805	19.035	16.971	15.044	16.29	19.776	21.122	17.846	42.892
386.5	26.169	15.903	18.522	18.798	18.75	16.857	15.079	16.516	19.7	21.066	17.668	42.996
387	25.969	15.652	18.429	18.84	18.511	16.732	15.161	16.713	19.617	21.071	17.443	43.19
387.5	25.894	15.544	18.503	18.921	18.347	16.58	15.231	16.812	19.552	21.129	17.355	43.127
388	25.802	15.48	18.499	19.057	18.251	16.602	15.202	16.888	19.584	21.33	17.438	43.218
388.5	25.919	15.529	18.581	19.255	18.394	16.721	15.145	16.875	19.687	21.41	17.414	44.017
389	26.037	15.811	18.661	19.479	18.638	16.787	15.01	16.854	19.802	21.352	17.469	44.573
389.5	25.92	16.091	18.735	19.707	18.721	16.825	14.821	16.734	19.875	21.147	17.455	44.711
390	25.801	16.228	18.695	19.787	18.724	16.908	14.582	16.563	19.882	21.04	17.564	44.442
390.5	25.694	16.206	18.538	19.788	18.689	16.928	14.294	16.422	19.818	20.941	17.688	43.646
391	25.897	16.054	18.356	19.785	18.707	16.903	14.1	16.31	19.75	20.896	17.645	43.379
391.5	26.429	16.009	18.353	19.689	18.966	16.91	14.061	16.311	19.697	20.905	17.589	43.378
392	26.832	16.209	18.536	19.654	19.326	16.661	14.253	16.406	19.673	20.854	17.47	43.725
392.5	26.929	16.29	18.666	19.549	19.6	16.44	14.407	16.391	19.567	20.826	17.34	43.692
393	26.508	16.2	18.734	19.365	19.392	16.239	14.406	16.27	19.466	21.045	17.362	43.501
393.5	26.255	16.089	18.611	19.301	19.266	16.033	14.295	16.045	19.482	21.227	17.323	43.221
394	26.169	15.764	18.37	19.092	18.99	15.92	14.17	15.753	19.505	21.288	17.369	42.911
394.5	26.391	15.572	18.288	18.945	18.768	15.888	14.239	15.561	19.597	21.305	17.338	43.082
395	26.753	15.564	18.357	19.014	18.699	15.925	14.497	15.57	19.599	21.148	17.274	43.667
395.5	26.737	15.547	18.602	19.075	18.501	16.075	14.772	15.716	19.547	21.124	17.223	44.579
396	26.541	15.707	18.698	19.215	18.474	16.331	14.939	15.972	19.429	21.29	17.091	45.258
396.5	26.34	15.83	18.842	19.445	18.615	16.763	15.102	16.174	19.257	21.232	17.037	45.786
397	26.177	15.956	18.833	19.401	18.782	17.204	15.196	16.326	19.186	21.109	16.901	45.847
397.5	26.035	16.148	18.864	19.338	18.902	17.446	15.175	16.385	19.226	20.845	16.772	45.863
398	26.187	16.278	19.02	19.404	18.927	17.53	15.082	16.488	19.177	20.678	16.675	45.686
398.5	26.201	16.171	18.971	19.345	18.887	17.278	14.739	16.56	18.986	20.655	16.601	45.701
399	26.328	15.97	19.015	19.55	18.842	16.962	14.395	16.521	18.685	20.671	16.56	44.998
399.5	26.427	15.883	18.99	19.755	18.796	16.8	14.153	16.438	18.58	20.879	16.703	43.855
400	26.377	15.716	18.745	19.842	18.547	16.728	14.245	16.27	18.886	20.997	16.867	43.44
400.5	26.109	15.661	18.504	19.891	18.37	16.694	14.405	16.12	19.258	21.213	16.933	43.616
401	25.875	15.72	18.287	19.83	18.281	16.699	14.446	15.989	19.336	21.169	16.896	44.461
401.5	25.823	15.851	18.314	19.901	18.426	16.702	14.327	15.945	19.033	21.103	16.748	44.693
402	25.861	15.956	18.421	19.825	18.573	16.775	14.112	16.005	18.72	21.302	16.737	44.344
402.5	26.258	15.933	18.413	19.792	18.574	16.909	14.015	16.112	18.573	21.385	16.873	44.556
403	26.465	15.601	18.257	19.689	18.381	16.961	14.119	16.245	18.683	21.52	16.96	44.951
403.5	26.589	15.405	18.273	19.583	18.358	16.93	14.217	16.343	18.791	21.48	17.009	45.495
404	26.889	15.475	18.379	19.626	18.592	16.939	14.323	16.298	18.757	21.203	17.116	45.251
404.5	26.971	15.535	18.654	19.722	18.91	16.939	14.345	16.218	18.684	21.076	17.279	44.56
405	26.766	15.632	18.699	19.624	19.09	16.93	14.292	16.193	18.632	21.087	17.335	44.134
405.5	26.072	15.54	18.489	19.396	18.836	16.906	14.278	16.244	18.665	21.316	17.232	44.184
406	25.479	15.409	18.361	19	18.394	16.86	14.198	16.275	18.634	21.711	17.178	44.482
406.5	25.513	15.226	18.438	18.692	18.199	16.92	14.144	16.288	18.714	22.061	17.108	44.001
407	25.885	15.188	18.6	18.772	18.1	17.049	14.206	16.306	18.663	22.253	17.146	43.983
407.5	26.451	15.16	18.81	19.096	18.386	17.104	14.368	16.285	18.542	22.181	17.074	43.56
408	26.709	15.238	18.868	19.609	18.776	17.051	14.526	16.343	18.525	21.854	16.988	43.345
408.5	26.837	15.416	18.83	19.887	19.053	16.976	14.659	16.367	18.507	21.564	16.909	43.489
409	26.916	15.196	18.745	19.786	19.209	16.955	14.768	16.464	18.559	21.421	16.946	43.325
409.5	26.72	14.996	18.671	19.523	19.016	17.116	14.812	16.606	18.64	21.45	16.959	43.49
410	26.483	14.76	18.593	19.267	18.859	17.306	14.915	16.836	18.614	21.639	17.025	43.576
410.5	26.344	14.797	18.672	19.146	18.744	17.371	14.913	17	18.532	21.678	17.124	43.765
411	26.274	15.131	18.874	19.155	18.846	17.403	14.803	17.097	18.483	21.786	17.259	43.96
411.5	26.289	15.357	18.929	19.213	18.998	17.279	14.64	17.134	18.514	21.816	17.417	43.997
412	26.136	15.462	18.892	19.387	18.989	16.963	14.448	16.924	18.528	21.897	17.542	43.835
412.5	25.766	15.33	18.628	19.54	18.907	16.663	14.335	16.749	18.501	21.872	17.449	43.586
413	25.59	15.2	18.317	19.594	18.811	16.461	14.385	16.631	18.392	21.628	17.267	43.776
413.5	25.399	15.064	18.072	19.646	18.698	16.502	14.431	16.683	18.248	21.55	17.071	43.95
414	25.35	14.949	17.894	19.633	18.645	16.68	14.491	16.816	18.259	21.591	17.061	43.931
414.5	25.598	14.96	17.941	19.783	18.603	16.88	14.399	16.852	18.416	21.48	17.151	43.457
415	25.908	14.932	18.021	19.96	18.628	17.047	14.326	16.792	18.562	21.427	17.318	42.956
415.5	26.166	15.131	17.994	19.95	18.69	17.112	14.325	16.679	18.486	21.215	17.239	42.769
416	26.251	15.268	18.117	19.919	18.678	17.1	14.36	16.622	18.244	21.218	17.087	42.952
416.5	26.338	15.21	18.17	19.84	18.593	17.066	14.455	16.674	18.007	21.342	17.087	43.018
417	26.403	15.087	18.33	19.739	18.521	17.07	14.596	16.852	17.854	21.44	17.086	42.807
417.5	26.439	15.052	18.533	19.854	18.588	17.078	14.727	17.044	17.898	21.477	17.283	42.93
418	26.514	15.254	18.579	19.971	18.793	17.03	14.786	17.057	18.032	21.493	17.488	43.3
418.5	26.482	15.414	18.475	20.005	19.009	16.93	14.735	16.839	18.145	21.715	17.465	43.28
419	26.562	15.452	18.451	20.096	19.099	16.886	14.674	16.706	18.249	21.941	17.42	42.725
419.5	26.503	15.357	18.317	19.981	19.094	16.946	14.56	16.57	18.249	21.938	17.278	42.07
420	26.385	15.336	18.441	19.838	19.128	17.08	14.52	16.644	18.242	21.887	17.143	41.848
420.5	26.152	15.491	18.485	19.721	19.196	17.101	14.507	16.796	18.172	21.71	16.988	42.594
421	26.119	15.471	18.41	19.724	19.268	16.96	14.55	16.785	18.054	21.614	16.961	44.095
421.5	26.183	15.45	18.425	19.878	19.262	16.862	14.676	16.806	17.946	21.805	17.026	45.13
422	26.245	15.33	18.297	19.93	19.159	16.868	14.859	16.895	17.916	21.919	17.039	45.233
422.5	26.369	15.242	18.259	19.93	19.009	16.989	14.991	16.948	17.964	21.984	17.141	44.797
423	26.425	15.331	18.276	19.845	18.997	17.118	15.046	17.049	18.012	22.016	17.192	44.397
423.5	26.305	15.375	18.327	19.814	18.984	17.107	14.986	17.034	17.933	22.003	17.258	44.386
424	26.324	15.493	18.542	20.098	19.111	17.043	14.9	16.985	17.85	22.071	17.414	44.331
424.5	26.263	15.476	18.598	20.222	19.207	16.956	14.822	16.969	17.827	22.018	17.351	44.117
425	26.197	15.338	18.625	20.31	19.401	16.904	14.818	16.958	17.808	21.801	17.316	43.579
425.5	26.29	15.296	18.422	20.244	19.619	16.877	14.819	16.924	17.819	21.461	17.174	43.364
426	26.271	15.318	18.443	20.219	19.777	16.93	14.847	16.884	17.789	21.253	17.152	43.296
426.5	26.45	15.216	18.437	20.165	19.826	16.988	14.827	16.813	17.75	21.239	17.221	43.19
427	26.55	15.113	18.394	20.117	19.688	16.988	14.766	16.803	17.644	21.302	17.094	42.999
427.5	26.401	14.947	18.337	20.111	19.524	16.968	14.799	16.881	17.631	21.408	16.992	43.083
428	26.28	14.84	18.167	20.052	19.364	16.942	14.875	17.012	17.647	21.492	16.953	43.239
428.5	26.265	14.926	18.197	20.3	19.347	17	15.078	17.215	17.747	21.534	17.057	43.46
429	26.407	15.035	18.222	20.337	19.306	17.109	15.231	17.288	17.769	21.602	17.384	43.698
429.5	26.578	15.14	18.265	20.319	19.242	17.135	15.218	17.175	17.612	21.576	17.614	43.681
430	26.554	15.257	18.431	20.267	19.172	17.093	15.11	17.013	17.579	21.579	17.666	43.477
430.5	26.317	15.23	18.588	20.151	19.215	17.041	14.926	16.842	17.59	21.547	17.513	43.154
431	26.149	15.161	18.72	20.149	19.266	17.102	14.842	16.99	17.797	21.444	17.18	43.231
431.5	26.008	15.135	18.597	19.963	19.254	17.296	14.916	17.231	17.879	21.342	16.975	43.282
432	26.04	15.165	18.348	19.767	19.068	17.469	15.136	17.477	17.812	21.322	16.881	43.609
432.5	26.107	15.246	18.196	19.69	18.855	17.496	15.262	17.593	17.691	21.366	16.985	43.656
433	25.975	15.246	18.127	19.719	18.667	17.458	15.277	17.6	17.583	21.422	17.155	43.492
433.5	25.754	15.18	18.266	19.879	18.57	17.322	15.112	17.498	17.551	21.487	17.253	43.587
434	25.67	15.126	18.382	19.977	18.555	17.244	15.022	17.453	17.512	21.496	17.329	43.55
434.5	25.793	15.142	18.503	20.019	18.591	17.211	15.139	17.459	17.514	21.577	17.389	43.444
435	25.998	15.223	18.621	20.107	18.763	17.232	15.353	17.458	17.498	21.568	17.313	43.273
435.5	26.159	15.2	18.654	20.166	18.996	17.259	15.569	17.46	17.555	21.439	17.242	43.017
436	26.092	15.117	18.717	20.102	19.095	17.256	15.665	17.443	17.698	21.327	17.14	42.972
436.5	25.943	15.033	18.683	20.031	19.196	17.261	15.71	17.394	17.818	21.25	17.096	43.023
437	25.673	15.015	18.696	20.029	19.256	17.285	15.691	17.383	17.752	21.182	17.123	43.368
437.5	25.499	14.995	18.628	20.022	19.229	17.248	15.607	17.306	17.601	21.245	17.12	43.741
438	25.475	14.973	18.66	20.144	19.19	17.201	15.497	17.216	17.497	21.213	17.073	43.688
438.5	25.685	14.945	18.916	20.274	19.163	17.026	15.275	17.123	17.409	21.122	16.993	43.415
439	25.954	15.002	19.071	20.327	19.165	16.881	15.002	16.997	17.449	21.073	16.92	43.001
439.5	25.908	15.037	19.14	20.416	19.149	16.967	14.987	16.958	17.498	20.968	16.923	43.042
440	25.795	15.085	19.106	20.448	19.186	17.085	15.094	16.986	17.44	20.975	17.02	43.249
440.5	25.829	15.214	18.938	20.512	19.203	17.227	15.298	17.05	17.522	21.011	17.159	43.388
441	25.841	15.371	18.723	20.437	19.247	17.279	15.438	17.177	17.582	21.083	17.359	43.446
441.5	25.883	15.417	18.519	20.389	19.355	17.271	15.501	17.302	17.621	21.145	17.43	43.37
442	25.739	15.224	18.234	20.103	19.286	17.355	15.512	17.369	17.693	21.254	17.377	43.445
442.5	25.512	14.933	18.152	19.889	19.247	17.414	15.566	17.464	17.655	21.382	17.339	43.507
443	25.54	14.704	18.139	19.806	19.174	17.432	15.604	17.512	17.622	21.399	17.237	43.437
443.5	25.621	14.689	18.207	19.83	19.013	17.4	15.632	17.543	17.584	21.406	17.232	43.546
444	25.605	14.79	18.317	19.927	18.885	17.333	15.668	17.505	17.642	21.353	17.217	43.689
444.5	25.703	14.926	18.511	20.083	18.823	17.352	15.685	17.435	17.69	21.253	17.168	44.029
445	25.683	15.006	18.702	20.092	18.835	17.426	15.646	17.375	17.773	21.261	17.119	44.463
445.5	25.681	15.029	18.754	20.033	18.971	17.453	15.583	17.379	17.756	21.347	17.198	44.466
446	25.776	15.023	18.635	19.992	19.068	17.491	15.587	17.382	17.584	21.341	17.331	44.197
446.5	25.745	14.983	18.489	19.859	19.098	17.528	15.649	17.368	17.448	21.388	17.477	43.723
447	25.845	14.946	18.483	19.767	19.149	17.549	15.773	17.362	17.352	21.365	17.522	43.417
447.5	25.988	14.955	18.725	19.849	19.207	17.571	15.891	17.421	17.344	21.435	17.502	43.61
448	26.136	14.993	18.902	19.9	19.261	17.543	15.898	17.493	17.321	21.552	17.479	44.166
448.5	26.188	15.125	18.774	20.028	19.367	17.51	15.884	17.528	17.269	21.524	17.49	44.78
449	26.107	15.228	18.594	20.081	19.404	17.515	15.834	17.517	17.286	21.435	17.489	45.234
449.5	26.065	15.209	18.426	20.058	19.387	17.502	15.814	17.51	17.299	21.298	17.425	45.425
450	26.056	15.175	18.52	20.139	19.334	17.518	15.877	17.539	17.277	21.213	17.285	45.193
450.5	26.131	15.075	18.637	20.192	19.227	17.542	15.942	17.588	17.282	21.159	17.258	44.618
451	26.056	14.981	18.643	20.131	19.087	17.519	15.984	17.537	17.289	21.034	17.22	43.98
451.5	25.93	14.983	18.548	19.958	19.07	17.474	15.928	17.424	17.353	20.938	17.231	43.572
452	25.877	14.985	18.579	19.763	19.14	17.42	15.852	17.357	17.445	20.953	17.298	43.49
452.5	25.948	14.911	18.658	19.658	19.317	17.415	15.8	17.341	17.466	21.112	17.288	43.602
453	26.038	14.927	18.796	19.767	19.429	17.49	15.768	17.378	17.408	21.256	17.26	43.732
453.5	26.099	14.846	18.865	19.886	19.368	17.577	15.707	17.409	17.419	21.305	17.261	43.779
454	25.848	14.801	18.854	19.935	19.204	17.656	15.611	17.382	17.362	21.209	17.269	44.264
454.5	25.66	14.773	18.8	19.928	19.141	17.773	15.538	17.408	17.399	21.095	17.387	44.487
455	25.545	14.73	18.698	19.793	19.231	17.853	15.507	17.408	17.45	21.136	17.538	44.366
455.5	25.634	14.746	18.615	19.773	19.314	17.809	15.52	17.301	17.464	21.248	17.663	44.036
456	25.839	14.74	18.495	19.781	19.282	17.719	15.559	17.121	17.395	21.331	17.661	43.392
456.5	25.92	14.766	18.45	19.932	19.242	17.61	15.614	16.97	17.344	21.361	17.572	43.529
457	25.885	14.798	18.399	20.125	19.207	17.559	15.721	16.968	17.321	21.318	17.49	43.883
457.5	25.788	14.802	18.432	20.207	19.204	17.654	15.826	17.201	17.351	21.306	17.462	44.393
458	25.767	14.885	18.546	20.283	19.275	17.722	15.914	17.428	17.44	21.427	17.515	44.893
458.5	25.809	15.003	18.73	20.394	19.393	17.829	15.931	17.551	17.439	21.487	17.511	44.919
459	25.846	15.162	18.92	20.492	19.514	17.915	15.959	17.61	17.49	21.459	17.488	44.807
459.5	25.946	15.256	19.127	20.511	19.65	18.009	15.965	17.64	17.597	21.391	17.446	44.596
460	25.918	15.299	19.198	20.356	19.653	18.13	15.942	17.644	17.693	21.293	17.399	44.389
460.5	25.921	15.253	19.201	20.229	19.558	18.238	15.927	17.649	17.733	21.283	17.395	44.505
461	25.946	15.244	19.139	20.117	19.582	18.261	15.903	17.582	17.662	21.31	17.309	44.7
461.5	25.985	15.248	19.087	20.186	19.618	18.169	15.872	17.527	17.623	21.349	17.364	44.553
462	26.056	15.147	18.992	20.298	19.689	18.02	15.876	17.533	17.627	21.399	17.441	44.245
462.5	25.994	15.166	18.895	20.483	19.785	17.962	15.866	17.573	17.712	21.525	17.513	44.081
463	25.808	15.106	18.739	20.632	19.747	17.943	15.876	17.618	17.738	21.582	17.503	44.357
463.5	25.559	14.89	18.619	20.639	19.593	17.929	15.869	17.651	17.707	21.615	17.47	45.063
464	25.36	14.826	18.613	20.656	19.498	17.848	15.838	17.664	17.704	21.55	17.421	45.467
464.5	25.383	14.785	18.772	20.676	19.596	17.794	15.848	17.607	17.656	21.455	17.417	45.267
465	25.521	14.85	19.041	20.696	19.627	17.814	15.876	17.579	17.669	21.311	17.379	45.086
465.5	25.697	14.862	19.307	20.718	19.691	17.885	15.895	17.501	17.647	21.241	17.377	45.039
466	25.775	14.775	19.393	20.63	19.628	18.007	15.95	17.488	17.649	21.212	17.377	45.159
466.5	25.823	14.714	19.278	20.516	19.542	18.123	16.006	17.551	17.699	21.282	17.343	45.342
467	25.933	14.779	19.196	20.516	19.445	18.23	16.113	17.645	17.843	21.323	17.257	45.414
467.5	26.144	14.902	19.167	20.583	19.425	18.227	16.124	17.715	18.012	21.296	17.189	45.588
468	26.34	15.102	19.226	20.745	19.42	18.136	16.059	17.697	18.031	21.313	17.303	45.468
468.5	26.342	15.253	19.308	20.903	19.548	18.1	16.033	17.647	17.903	21.344	17.478	45.116
469	26.184	15.353	19.288	20.886	19.769	18.137	16.071	17.658	17.783	21.392	17.607	44.545
469.5	26.026	15.293	19.257	20.77	19.949	18.194	16.15	17.649	17.718	21.323	17.649	44.144
470	25.891	15.117	19.215	20.684	20.02	18.207	16.149	17.604	17.724	21.261	17.602	43.986
470.5	25.908	15.026	19.191	20.715	20.028	18.176	16.137	17.601	17.718	21.091	17.54	43.93
471	25.947	14.905	19.191	20.789	19.979	18.172	16.153	17.588	17.706	21.018	17.529	43.941
471.5	25.952	14.856	19.179	20.781	19.858	18.215	16.239	17.66	17.73	21.101	17.57	44.013
472	25.933	14.789	19.068	20.663	19.72	18.243	16.299	17.744	17.813	21.222	17.709	43.949
472.5	25.936	14.797	19.127	20.571	19.716	18.291	16.3	17.767	17.894	21.396	17.723	43.929
473	25.959	14.856	19.211	20.613	19.801	18.307	16.292	17.752	17.936	21.408	17.684	44.072
473.5	25.971	14.911	19.313	20.736	19.886	18.279	16.29	17.709	17.981	21.393	17.521	44.178
474	25.903	14.913	19.326	20.718	19.802	18.273	16.348	17.66	18.029	21.358	17.393	44.311
474.5	25.948	14.873	19.303	20.71	19.57	18.34	16.396	17.668	17.999	21.352	17.374	44.28
475	25.875	14.896	19.28	20.682	19.38	18.41	16.451	17.698	17.881	21.333	17.392	44.191
475.5	25.748	14.997	19.315	20.685	19.405	18.449	16.491	17.756	17.709	21.309	17.466	44.314
476	25.545	15.055	19.28	20.67	19.495	18.409	16.518	17.75	17.656	21.312	17.542	44.338
476.5	25.445	15.118	19.208	20.587	19.692	18.366	16.554	17.708	17.691	21.241	17.581	44.363
477	25.573	15.099	19.119	20.517	19.799	18.368	16.526	17.693	17.76	21.183	17.585	44.414
477.5	25.586	15.063	19.081	20.458	19.818	18.412	16.525	17.676	17.756	21.201	17.603	44.173
478	25.439	14.978	19.061	20.453	19.691	18.451	16.514	17.755	17.672	21.285	17.596	44.236
478.5	25.282	14.922	19.117	20.473	19.576	18.445	16.532	17.858	17.609	21.367	17.564	44.263
479	25.21	14.903	19.163	20.519	19.577	18.447	16.627	17.951	17.61	21.42	17.575	44.696
479.5	25.364	15.022	19.26	20.652	19.697	18.376	16.682	17.998	17.605	21.456	17.662	45.119
480	25.545	15.147	19.307	20.694	19.718	18.286	16.68	17.984	17.651	21.469	17.748	45.209
480.5	25.674	15.189	19.287	20.731	19.727	18.246	16.614	17.903	17.656	21.436	17.807	45.003
481	25.774	15.222	19.298	20.772	19.778	18.253	16.568	17.88	17.61	21.373	17.74	44.482
481.5	25.674	15.16	19.311	20.725	19.858	18.327	16.583	17.883	17.602	21.337	17.675	44.348
482	25.592	15.113	19.364	20.691	19.901	18.404	16.63	17.894	17.556	21.293	17.69	44.45
482.5	25.583	14.974	19.406	20.545	19.819	18.396	16.625	17.892	17.58	21.288	17.773	44.528
483	25.651	14.83	19.384	20.447	19.714	18.355	16.615	17.895	17.607	21.285	17.888	44.588
483.5	25.706	14.775	19.418	20.425	19.673	18.339	16.635	17.931	17.619	21.291	17.945	44.308
484	25.714	14.757	19.365	20.385	19.624	18.328	16.63	17.968	17.651	21.272	17.939	44.002
484.5	25.743	14.838	19.373	20.414	19.623	18.327	16.648	17.987	17.66	21.302	17.884	43.89
485	25.703	14.839	19.345	20.463	19.659	18.358	16.681	17.991	17.626	21.41	17.844	43.918
485.5	25.678	14.831	19.388	20.568	19.707	18.413	16.718	18.032	17.631	21.593	17.815	44.249
486	25.499	14.791	19.454	20.611	19.664	18.518	16.751	18.032	17.651	21.625	17.759	44.458
486.5	25.375	14.762	19.485	20.588	19.608	18.627	16.76	18.018	17.673	21.626	17.747	44.192
487	25.29	14.8	19.532	20.507	19.565	18.648	16.766	18.023	17.719	21.569	17.714	43.945
487.5	25.309	14.913	19.482	20.532	19.622	18.635	16.745	18.04	17.769	21.572	17.694	43.923
488	25.493	15.015	19.52	20.598	19.737	18.589	16.779	18.082	17.828	21.583	17.719	44.262
488.5	25.617	15.109	19.544	20.6	19.747	18.604	16.867	18.112	17.896	21.548	17.808	44.851
489	25.795	15.171	19.627	20.591	19.799	18.649	16.984	18.111	17.887	21.474	17.958	45.279
489.5	25.814	15.169	19.714	20.571	19.821	18.71	17.046	18.062	17.826	21.419	18.089	45.657
490	25.726	15.13	19.654	20.585	19.834	18.731	17.019	17.998	17.775	21.451	18.155	45.952
490.5	25.682	15.016	19.568	20.584	19.824	18.748	16.995	17.977	17.752	21.569	18.236	45.972
491	25.658	14.898	19.534	20.543	19.801	18.798	17.016	17.981	17.795	21.722	18.317	45.77
491.5	25.755	14.911	19.577	20.567	19.886	18.841	17.067	18.031	17.88	21.755	18.371	45.345
492	25.827	14.991	19.716	20.673	20.004	18.88	17.117	18.084	17.983	21.725	18.315	45.129
492.5	25.879	15.103	19.844	20.888	20.126	18.951	17.158	18.167	18.034	21.674	18.182	44.818
493	25.843	15.131	19.885	21.027	20.154	19.011	17.222	18.259	18.122	21.606	18.121	44.874
493.5	25.818	15.03	19.885	21.038	20.185	19.072	17.282	18.313	18.198	21.605	18.122	44.951
494	25.761	14.943	19.901	20.994	20.194	19.097	17.32	18.32	18.276	21.639	18.261	45.181
494.5	25.734	14.918	19.903	20.952	20.16	19.12	17.338	18.281	18.337	21.677	18.319	45.491
495	25.773	15.012	19.943	20.992	20.152	19.195	17.322	18.26	18.364	21.763	18.365	45.679
495.5	25.851	15.141	20.06	21.056	20.2	19.301	17.318	18.291	18.385	21.813	18.431	45.719
496	25.842	15.172	20.106	21.036	20.278	19.426	17.304	18.332	18.423	21.913	18.606	45.64
496.5	25.913	15.142	20.143	21.046	20.356	19.523	17.315	18.398	18.475	21.986	18.842	45.56
497	26.033	15.108	20.12	21.131	20.379	19.583	17.416	18.427	18.615	22.064	19.04	45.503
497.5	26.236	15.122	20.173	21.302	20.406	19.641	17.518	18.444	18.759	22.073	19.113	45.6
498	26.376	15.173	20.338	21.423	20.51	19.739	17.593	18.438	18.879	22.11	19.048	45.664
498.5	26.395	15.245	20.571	21.471	20.604	19.838	17.618	18.405	18.929	22.144	18.999	45.939
499	26.313	15.28	20.644	21.482	20.724	19.856	17.584	18.32	18.968	22.132	18.949	46.267
499.5	26.278	15.354	20.674	21.607	20.869	19.879	17.588	18.265	19.056	22.19	18.986	46.481
500	26.365	15.404	20.697	21.782	20.962	19.923	17.635	18.26	19.22	22.241	19.113	46.582
500.5	26.512	15.482	20.727	21.921	21.045	20.04	17.723	18.295	19.339	22.355	19.282	46.207
501	26.634	15.504	20.808	21.897	21	20.192	17.818	18.356	19.441	22.48	19.419	46.205
501.5	26.758	15.496	20.82	21.839	20.921	20.31	17.889	18.412	19.461	22.577	19.521	46.342
502	26.763	15.448	20.809	21.811	20.884	20.39	17.933	18.473	19.444	22.612	19.555	46.76
502.5	26.796	15.413	20.863	21.901	20.926	20.461	17.944	18.521	19.454	22.598	19.58	47.099
503	26.842	15.488	20.933	22.062	21.102	20.523	17.949	18.517	19.488	22.608	19.62	47.18
503.5	27.007	15.599	21.097	22.189	21.224	20.588	17.957	18.547	19.607	22.675	19.693	47.298
504	27.263	15.679	21.202	22.261	21.271	20.657	17.994	18.581	19.793	22.789	19.834	47.527
504.5	27.436	15.655	21.282	22.305	21.287	20.723	18.044	18.625	19.992	22.875	20.008	47.617
505	27.587	15.614	21.363	22.349	21.321	20.848	18.143	18.684	20.182	22.86	20.111	47.689
505.5	27.623	15.615	21.464	22.451	21.473	20.98	18.202	18.715	20.333	22.819	20.219	47.701
506	27.713	15.68	21.592	22.535	21.635	21.149	18.246	18.787	20.468	22.827	20.341	47.589
506.5	27.767	15.756	21.689	22.612	21.841	21.318	18.225	18.814	20.612	22.924	20.496	47.72
507	27.838	15.783	21.766	22.727	21.977	21.45	18.224	18.816	20.759	23.07	20.656	47.807
507.5	27.988	15.774	21.856	22.771	22.048	21.56	18.276	18.785	20.948	23.233	20.725	47.908
508	28.127	15.765	21.996	22.849	22.033	21.65	18.329	18.736	21.182	23.294	20.754	48.125
508.5	28.254	15.844	22.15	22.88	22.039	21.761	18.378	18.763	21.402	23.331	20.912	48.147
509	28.398	15.967	22.259	22.996	22.17	21.881	18.426	18.808	21.619	23.38	21.073	48.224
509.5	28.652	16.068	22.346	23.183	22.426	22.029	18.496	18.886	21.743	23.461	21.228	48.371
510	28.882	16.067	22.39	23.273	22.62	22.163	18.577	18.971	21.886	23.644	21.396	48.492
510.5	29.13	16.04	22.431	23.316	22.746	22.307	18.652	19.039	22.08	23.78	21.516	48.637
511	29.332	16.064	22.615	23.389	22.837	22.413	18.711	19.065	22.327	23.856	21.715	48.844
511.5	29.503	16.125	22.75	23.493	22.884	22.543	18.775	19.082	22.562	23.873	21.837	48.975
512	29.722	16.188	22.948	23.637	23.025	22.735	18.832	19.08	22.773	23.868	21.942	49.224
512.5	29.774	16.205	22.987	23.672	23.087	22.926	18.911	19.097	22.945	23.974	22.027	49.617
513	29.739	16.263	23.026	23.753	23.219	23.108	19.006	19.171	23.116	24.089	22.16	49.802
513.5	29.755	16.314	23.149	23.807	23.309	23.268	19.103	19.261	23.298	24.265	22.372	49.903
514	29.867	16.387	23.362	23.911	23.407	23.441	19.213	19.322	23.45	24.447	22.593	49.88
514.5	30.141	16.47	23.619	24.009	23.472	23.642	19.304	19.358	23.643	24.616	22.818	50.003
515	30.335	16.507	23.758	24.136	23.59	23.758	19.338	19.364	23.795	24.711	22.979	50.354
515.5	30.507	16.619	23.893	24.319	23.74	23.858	19.342	19.397	23.996	24.687	23.097	50.581
516	30.573	16.692	24.008	24.492	23.882	23.933	19.346	19.433	24.184	24.647	23.161	50.844
516.5	30.729	16.764	24.146	24.58	24.014	24.041	19.406	19.451	24.442	24.644	23.22	51.041
517	30.895	16.795	24.295	24.701	24.122	24.201	19.576	19.491	24.676	24.766	23.269	51.369
517.5	31.017	16.742	24.379	24.736	24.216	24.374	19.724	19.535	24.883	24.887	23.361	51.656
518	31.274	16.763	24.467	24.85	24.378	24.509	19.786	19.627	25.053	24.984	23.464	51.915
518.5	31.543	16.832	24.549	24.822	24.549	24.641	19.797	19.698	25.192	25.045	23.642	52.042
519	31.915	16.952	24.665	24.764	24.744	24.783	19.777	19.701	25.386	25.098	23.811	52.087
519.5	32.22	17.07	24.836	24.735	24.917	24.944	19.796	19.688	25.592	25.226	23.994	51.798
520	32.385	17.119	24.971	24.872	24.937	25.119	19.899	19.684	25.855	25.325	24.055	51.66
520.5	32.55	17.204	25.143	25.1	25.013	25.225	19.977	19.666	26.177	25.441	24.083	51.469
521	32.568	17.254	25.187	25.247	25.076	25.325	20.023	19.726	26.503	25.486	24.16	51.59
521.5	32.57	17.304	25.285	25.311	25.206	25.45	20.059	19.813	26.756	25.585	24.326	51.814
522	32.65	17.279	25.403	25.262	25.334	25.626	20.134	19.937	26.933	25.65	24.529	52.07
522.5	32.766	17.25	25.503	25.223	25.404	25.806	20.2	20.046	27.075	25.751	24.673	52.167
523	33.064	17.285	25.632	25.247	25.526	25.873	20.216	20.06	27.176	25.798	24.78	52.047
523.5	33.261	17.312	25.716	25.357	25.669	25.907	20.198	20.044	27.325	25.838	24.892	51.94
524	33.473	17.319	25.866	25.534	25.73	25.88	20.204	19.993	27.436	25.925	24.97	51.979
524.5	33.645	17.318	26.08	25.676	25.814	25.835	20.259	19.947	27.563	26.014	25.093	52.398
525	33.798	17.383	26.299	25.719	25.818	25.85	20.343	19.972	27.736	26.096	25.171	53.062
525.5	33.948	17.51	26.464	25.777	25.862	25.947	20.449	20.075	27.912	26.139	25.162	53.301
526	34.2	17.644	26.527	25.901	25.937	26.12	20.548	20.204	28.092	26.201	25.187	53.233
526.5	34.487	17.659	26.469	25.965	25.965	26.307	20.636	20.333	28.182	26.256	25.165	53.124
527	34.66	17.606	26.458	25.972	25.98	26.393	20.709	20.34	28.251	26.307	25.206	53.18
527.5	34.697	17.511	26.495	25.845	25.978	26.449	20.74	20.297	28.346	26.35	25.346	53.366
528	34.715	17.484	26.725	25.791	26.025	26.476	20.771	20.251	28.489	26.43	25.489	53.305
528.5	34.79	17.51	26.904	25.802	26.158	26.51	20.804	20.233	28.63	26.622	25.682	53.144
529	34.901	17.569	27.029	25.745	26.298	26.59	20.807	20.274	28.788	26.802	25.78	53.171
529.5	34.973	17.642	27.124	25.755	26.384	26.676	20.811	20.288	28.98	26.902	25.782	53.473
530	34.989	17.709	27.174	25.753	26.364	26.765	20.832	20.315	29.186	26.902	25.804	53.911
530.5	35.012	17.751	27.286	25.862	26.373	26.813	20.869	20.335	29.319	26.832	25.893	54.325
531	35.043	17.789	27.294	25.969	26.397	26.893	20.973	20.423	29.408	26.881	25.977	54.469
531.5	35.18	17.836	27.367	26.03	26.471	27.006	21.068	20.535	29.494	26.978	25.997	54.312
532	35.309	17.796	27.464	26.008	26.571	27.111	21.116	20.537	29.649	27.04	25.94	54.295
532.5	35.368	17.798	27.608	26.082	26.611	27.179	21.155	20.542	29.763	27.051	25.894	54.374
533	35.336	17.738	27.684	26.171	26.607	27.144	21.147	20.499	29.893	27.022	25.924	54.373
533.5	35.362	17.743	27.718	26.203	26.618	27.106	21.212	20.481	29.974	27.098	26.023	54.25
534	35.607	17.819	27.746	26.18	26.677	27.1	21.263	20.532	30.095	27.18	26.183	53.78
534.5	35.884	17.878	27.824	26.064	26.734	27.123	21.286	20.564	30.26	27.336	26.33	53.326
535	36.034	17.903	27.896	26.085	26.731	27.207	21.219	20.575	30.347	27.373	26.421	53.322
535.5	36.062	17.886	28.017	26.167	26.717	27.305	21.16	20.565	30.411	27.407	26.453	53.473
536	36.015	17.861	28.091	26.264	26.774	27.418	21.219	20.598	30.394	27.404	26.483	53.897
536.5	35.957	17.909	28.107	26.331	26.889	27.509	21.329	20.684	30.466	27.428	26.545	54.074
537	35.97	17.999	28.095	26.271	26.896	27.602	21.402	20.785	30.633	27.487	26.614	53.969
537.5	35.989	18.018	28.111	26.231	26.944	27.681	21.447	20.905	30.792	27.506	26.67	53.984
538	36.114	17.966	28.268	26.296	26.988	27.654	21.478	20.945	30.869	27.532	26.715	53.952
538.5	36.295	17.914	28.426	26.399	27.096	27.595	21.499	20.939	30.925	27.593	26.725	54.118
539	36.381	17.911	28.513	26.538	27.232	27.508	21.558	20.856	30.945	27.71	26.711	54.165
539.5	36.475	17.934	28.509	26.611	27.342	27.448	21.599	20.778	30.978	27.708	26.626	54.261
540	36.585	17.943	28.568	26.698	27.374	27.476	21.64	20.759	31.057	27.712	26.605	54.234
540.5	36.649	17.937	28.664	26.774	27.326	27.529	21.671	20.779	31.134	27.676	26.556	53.992
541	36.653	17.904	28.719	26.739	27.27	27.592	21.674	20.787	31.286	27.761	26.584	53.756
541.5	36.575	17.915	28.789	26.661	27.269	27.639	21.687	20.789	31.406	27.789	26.614	53.582
542	36.477	17.822	28.839	26.555	27.26	27.652	21.714	20.811	31.468	27.774	26.692	53.853
542.5	36.573	17.781	28.906	26.507	27.228	27.69	21.758	20.849	31.495	27.742	26.784	54.053
543	36.71	17.731	28.917	26.527	27.289	27.787	21.806	20.899	31.54	27.745	26.868	54.135
543.5	36.827	17.699	28.9	26.549	27.352	27.896	21.884	20.932	31.563	27.831	26.928	53.989
544	36.82	17.78	28.936	26.589	27.484	27.916	21.935	20.955	31.661	27.987	27.005	53.975
544.5	36.823	17.851	29.071	26.626	27.552	27.895	21.975	20.941	31.715	28.137	27.045	53.88
545	36.917	17.91	29.154	26.676	27.561	27.942	22.025	20.931	31.776	28.25	27.01	53.888
545.5	37.102	17.95	29.269	26.775	27.573	28.007	22.07	20.93	31.821	28.264	26.992	53.956
546	37.151	17.886	29.286	26.735	27.469	28.069	22.147	20.954	31.837	28.225	27.005	54.209
546.5	37.141	17.897	29.395	26.759	27.424	28.063	22.217	20.98	31.918	28.261	27.146	54.391
547	37.143	17.942	29.541	26.793	27.491	28.052	22.277	21.062	31.937	28.375	27.373	54.366
547.5	37.158	18.008	29.578	26.841	27.594	28.091	22.317	21.152	31.98	28.469	27.51	54.119
548	37.106	18.042	29.493	26.879	27.693	28.164	22.306	21.264	31.992	28.484	27.542	54.131
548.5	37.013	18.028	29.364	26.916	27.683	28.2	22.273	21.29	32.029	28.389	27.499	54.195
549	36.911	17.956	29.334	26.943	27.605	28.229	22.29	21.238	32.109	28.417	27.508	54.344
549.5	37.071	18.002	29.45	27.051	27.573	28.337	22.355	21.186	32.232	28.535	27.551	54.245
550	37.358	18.044	29.484	27.136	27.559	28.429	22.424	21.176	32.351	28.622	27.576	54.015
550.5	37.596	18.081	29.507	27.153	27.534	28.517	22.44	21.182	32.43	28.593	27.54	53.827
551	37.718	18.063	29.548	27.195	27.532	28.512	22.413	21.163	32.459	28.558	27.502	53.653
551.5	37.808	18.103	29.643	27.182	27.678	28.481	22.46	21.191	32.403	28.58	27.502	53.821
552	38.062	18.22	29.785	27.221	27.889	28.496	22.564	21.262	32.356	28.676	27.527	54.188
552.5	38.219	18.302	29.875	27.279	28.035	28.487	22.723	21.376	32.287	28.705	27.598	54.66
553	38.264	18.266	29.979	27.324	28	28.523	22.838	21.439	32.333	28.736	27.664	54.947
553.5	38.127	18.192	30.028	27.382	27.884	28.523	22.877	21.379	32.489	28.77	27.706	54.566
554	38.127	18.135	30.011	27.349	27.8	28.513	22.817	21.313	32.61	28.802	27.763	54.238
554.5	38.185	18.121	29.951	27.347	27.805	28.523	22.75	21.353	32.655	28.847	27.824	54.084
555	38.214	18.172	29.994	27.338	27.874	28.512	22.667	21.406	32.642	28.883	27.903	54.361
555.5	38.154	18.279	30.156	27.413	28.038	28.514	22.681	21.489	32.651	29.002	28.034	54.487
556	38.123	18.388	30.328	27.412	28.166	28.523	22.721	21.561	32.731	29.084	28.152	54.539
556.5	38.214	18.458	30.434	27.397	28.213	28.541	22.732	21.576	32.837	29.123	28.257	54.265
557	38.388	18.385	30.466	27.365	28.146	28.568	22.769	21.528	32.973	29.134	28.226	54.269
557.5	38.481	18.315	30.464	27.515	28.049	28.529	22.802	21.432	33.013	29.12	28.15	54.321
558	38.402	18.24	30.436	27.642	28.039	28.509	22.848	21.354	32.976	29.225	28.149	54.432
558.5	38.277	18.198	30.423	27.645	28.079	28.586	22.897	21.329	32.896	29.283	28.176	54.375
559	38.224	18.138	30.44	27.599	28.163	28.735	22.952	21.321	32.912	29.309	28.172	54.364
559.5	38.274	18.104	30.452	27.569	28.143	28.852	23.013	21.301	32.968	29.298	28.107	54.438
560	38.239	18.065	30.402	27.628	28.061	28.813	23.076	21.318	33.015	29.287	28.063	54.51
560.5	38.144	18.122	30.343	27.732	28.063	28.761	23.137	21.362	33.093	29.28	28.101	54.579
561	38.108	18.152	30.33	27.704	28.145	28.712	23.138	21.399	33.148	29.303	28.149	54.629
561.5	38.107	18.191	30.475	27.688	28.146	28.707	23.136	21.414	33.197	29.305	28.212	54.57
562	38.203	18.236	30.551	27.744	28.088	28.677	23.185	21.409	33.114	29.357	28.3	54.394
562.5	38.292	18.194	30.601	27.756	27.94	28.658	23.284	21.429	33.023	29.405	28.349	54.027
563	38.463	18.132	30.658	27.803	27.992	28.618	23.293	21.472	33	29.376	28.362	53.913
563.5	38.584	18.082	30.67	27.828	28.002	28.591	23.27	21.517	33.018	29.34	28.341	54.145
564	38.573	18.1	30.709	27.805	27.969	28.578	23.266	21.534	33.072	29.287	28.319	54.394
564.5	38.51	18.225	30.736	27.857	27.98	28.543	23.327	21.516	33.077	29.282	28.318	54.428
565	38.408	18.273	30.747	27.863	28.027	28.501	23.397	21.503	33.064	29.368	28.306	54.043
565.5	38.432	18.285	30.835	27.837	28.102	28.503	23.465	21.529	33.064	29.402	28.294	53.535
566	38.457	18.25	30.864	27.761	28.068	28.536	23.504	21.547	33.051	29.429	28.275	53.254
566.5	38.475	18.147	30.9	27.713	27.926	28.629	23.535	21.544	33.121	29.459	28.327	53.291
567	38.338	18.057	30.903	27.736	27.824	28.655	23.49	21.472	33.188	29.534	28.44	53.477
567.5	38.328	17.986	30.859	27.859	27.815	28.643	23.505	21.408	33.198	29.593	28.492	53.838
568	38.292	17.926	30.758	27.88	27.907	28.604	23.565	21.375	33.189	29.526	28.465	54.02
568.5	38.423	17.91	30.725	27.791	27.987	28.508	23.616	21.366	33.174	29.413	28.347	53.82
569	38.542	17.853	30.777	27.713	28.008	28.419	23.646	21.382	33.151	29.351	28.197	53.45
569.5	38.589	17.832	30.871	27.612	27.976	28.356	23.666	21.373	33.165	29.359	28.246	53.066
570	38.574	17.794	30.89	27.578	27.892	28.311	23.699	21.384	33.191	29.324	28.305	53.018
570.5	38.474	17.753	30.843	27.577	27.818	28.281	23.738	21.376	33.272	29.176	28.425	53.126
571	38.348	17.708	30.819	27.704	27.773	28.247	23.768	21.364	33.371	29.093	28.441	53.152
571.5	38.212	17.692	30.845	27.8	27.714	28.178	23.757	21.315	33.438	29.073	28.358	53.166
572	38.157	17.752	30.879	27.905	27.778	28.092	23.738	21.237	33.369	29.106	28.242	53.166
572.5	38.027	17.815	30.896	27.931	27.832	27.982	23.686	21.156	33.347	29.152	28.082	53.35
573	37.973	17.898	30.906	27.917	27.901	27.947	23.679	21.119	33.294	29.131	28.032	53.33
573.5	37.785	17.917	30.919	27.954	27.915	27.987	23.669	21.116	33.271	29.103	28.071	53.116
574	37.608	17.868	30.965	27.969	27.826	28.08	23.684	21.145	33.211	29.082	28.198	52.93
574.5	37.549	17.817	30.998	28.113	27.828	28.167	23.747	21.208	33.117	29.096	28.268	52.978
575	37.622	17.775	31.156	28.182	27.744	28.229	23.836	21.272	33.14	29.164	28.307	53.362
575.5	37.75	17.773	31.245	28.225	27.647	28.229	23.897	21.337	33.2	29.242	28.351	53.706
576	37.739	17.785	31.32	28.188	27.481	28.184	23.931	21.387	33.188	29.264	28.313	53.694
576.5	37.62	17.77	31.282	28.148	27.445	28.06	23.96	21.394	33.104	29.281	28.281	53.442
577	37.535	17.735	31.239	28.107	27.526	28.015	24.009	21.374	33.037	29.32	28.22	53.065
577.5	37.57	17.716	31.191	28.097	27.643	28.058	23.977	21.336	33.058	29.323	28.186	52.776
578	37.635	17.707	31.165	28.125	27.706	28.148	23.922	21.277	33.142	29.327	28.13	52.72
578.5	37.646	17.805	31.161	28.191	27.748	28.249	23.948	21.305	33.2	29.254	28.086	52.914
579	37.667	17.939	31.247	28.243	27.791	28.314	24.072	21.351	33.194	29.166	28.05	53.08
579.5	37.726	17.981	31.311	28.175	27.799	28.298	24.168	21.32	33.144	29.135	28.082	53.098
580	37.71	17.954	31.294	28.068	27.727	28.211	24.233	21.263	33.042	29.112	28.109	53.057
580.5	37.736	17.888	31.253	27.925	27.632	28.108	24.207	21.189	32.995	29.126	28.177	52.969
581	37.664	17.824	31.244	27.969	27.641	28.074	24.213	21.167	33.091	29.164	28.186	52.825
581.5	37.603	17.795	31.373	28.091	27.753	28.092	24.204	21.169	33.272	29.246	28.224	52.866
582	37.543	17.775	31.44	28.291	27.813	28.102	24.2	21.173	33.349	29.25	28.269	52.857
582.5	37.433	17.827	31.498	28.407	27.745	28.108	24.19	21.186	33.316	29.173	28.298	52.887
583	37.378	17.827	31.428	28.417	27.578	28.17	24.227	21.197	33.242	29.08	28.344	52.678
583.5	37.293	17.783	31.299	28.345	27.45	28.224	24.277	21.232	33.237	29.103	28.328	52.573
584	37.322	17.705	31.217	28.301	27.458	28.313	24.315	21.265	33.283	29.139	28.396	52.859
584.5	37.477	17.645	31.222	28.315	27.513	28.407	24.355	21.32	33.332	29.199	28.451	53.239
585	37.585	17.623	31.305	28.413	27.579	28.505	24.392	21.327	33.359	29.243	28.482	53.391
585.5	37.586	17.608	31.333	28.519	27.586	28.567	24.436	21.308	33.319	29.334	28.512	53.074
586	37.45	17.647	31.326	28.528	27.616	28.538	24.481	21.302	33.241	29.336	28.494	52.61
586.5	37.331	17.681	31.271	28.481	27.592	28.404	24.492	21.28	33.176	29.293	28.532	52.307
587	37.314	17.742	31.348	28.461	27.643	28.305	24.511	21.285	33.226	29.163	28.56	52.401
587.5	37.358	17.775	31.367	28.498	27.693	28.288	24.547	21.293	33.274	29.161	28.657	52.61
588	37.514	17.83	31.343	28.62	27.754	28.342	24.566	21.294	33.309	29.145	28.741	52.876
588.5	37.665	17.79	31.253	28.672	27.807	28.403	24.575	21.308	33.273	29.203	28.855	53.109
589	37.721	17.724	31.164	28.664	27.716	28.436	24.556	21.283	33.189	29.252	28.934	53.158
589.5	37.736	17.673	31.222	28.632	27.707	28.505	24.57	21.265	33.151	29.287	28.981	53.183
590	37.685	17.679	31.329	28.597	27.728	28.537	24.636	21.156	33.149	29.317	28.942	53.091
590.5	37.732	17.733	31.436	28.675	27.761	28.608	24.682	21.068	33.232	29.277	28.885	53
591	37.821	17.795	31.504	28.844	27.766	28.662	24.657	21.051	33.364	29.214	28.862	52.705
591.5	37.809	17.844	31.587	29.003	27.691	28.765	24.644	21.093	33.451	29.157	28.808	52.184
592	37.756	17.86	31.685	29.036	27.692	28.856	24.667	21.139	33.511	29.198	28.834	51.939
592.5	37.666	17.798	31.724	28.962	27.643	28.917	24.728	21.121	33.485	29.196	28.819	52.093
593	37.665	17.767	31.719	28.854	27.675	28.929	24.79	21.089	33.449	29.154	28.87	52.646
593.5	37.71	17.825	31.799	28.901	27.776	28.87	24.848	21.08	33.45	29.013	28.838	52.914
594	37.757	17.969	31.914	29.01	27.93	28.795	24.936	21.129	33.491	28.956	28.766	52.81
594.5	37.75	18.069	32.011	29.1	28.066	28.779	25	21.209	33.603	28.962	28.77	52.436
595	37.765	18.142	31.987	29.153	28.082	28.819	25.051	21.253	33.68	29.076	28.854	52.213
595.5	37.761	18.113	31.896	29.196	28.052	28.927	25.04	21.216	33.697	29.145	28.978	52.119
596	37.834	18.072	31.827	29.223	27.984	29.022	24.962	21.174	33.698	29.177	29.086	52.035
596.5	37.933	18.052	31.769	29.173	27.876	29.083	24.848	21.14	33.707	29.142	29.08	52.062
597	38.096	18.049	31.777	29.19	27.861	29.102	24.829	21.139	33.782	29.155	29.03	52.06
597.5	38.277	18.063	31.823	29.242	27.912	29.067	24.871	21.15	33.855	29.238	28.914	52.264
598	38.329	18.08	31.912	29.455	27.961	28.971	24.976	21.161	33.89	29.314	28.834	52.324
598.5	38.213	18.077	31.934	29.562	28.001	28.877	25.022	21.15	33.919	29.301	28.852	52.447
599	38.071	18.093	31.943	29.62	28.048	28.871	25.073	21.124	33.943	29.227	28.935	52.5
599.5	37.88	18.162	32.002	29.64	28.143	28.985	25.126	21.111	33.979	29.148	29.068	52.398
600	37.858	18.222	32.033	29.638	28.216	29.113	25.195	21.165	33.959	29.131	29.134	52.272
600.5	37.736	18.248	32.1	29.683	28.214	29.253	25.159	21.257	33.944	29.131	29.228	52.159
601	37.639	18.159	32.1	29.766	28.121	29.378	25.086	21.348	33.928	29.131	29.288	52.143
601.5	37.524	18.045	32.151	29.851	28.038	29.512	25.032	21.396	33.99	29.089	29.41	52.204
602	37.468	18.008	32.243	29.886	27.99	29.577	25.039	21.397	34.017	29.052	29.481	52.267
602.5	37.625	18.042	32.271	29.867	28.053	29.568	25.077	21.343	33.988	29.016	29.536	52.214
603	37.786	18.092	32.2	29.884	28.152	29.549	25.143	21.312	33.898	29.026	29.482	51.83
603.5	37.913	18.111	32.081	29.934	28.181	29.526	25.213	21.272	33.874	29.101	29.456	51.318
604	37.901	18.068	32.114	29.969	28.162	29.568	25.276	21.285	33.913	29.154	29.423	51.18
604.5	37.858	18.045	32.174	29.952	28.114	29.606	25.299	21.274	33.943	29.267	29.455	51.475
605	37.759	18.035	32.284	29.887	28.095	29.577	25.267	21.251	33.916	29.259	29.432	52.119
605.5	37.788	18.074	32.308	29.77	28.071	29.52	25.218	21.246	33.893	29.23	29.389	52.3
606	37.761	18.059	32.362	29.684	28.04	29.462	25.197	21.224	33.936	29.082	29.306	52.14
606.5	37.788	17.985	32.405	29.641	28.011	29.527	25.227	21.231	34.013	28.951	29.278	51.719
607	37.746	17.923	32.314	29.752	27.956	29.615	25.268	21.233	34.035	28.901	29.264	51.603
607.5	37.626	17.911	32.237	29.832	27.933	29.65	25.276	21.249	34.032	28.961	29.325	51.706
608	37.559	17.971	32.15	29.85	27.92	29.638	25.258	21.278	34.001	29.063	29.388	51.777
608.5	37.593	18.031	32.18	29.851	27.95	29.58	25.245	21.261	33.977	29.117	29.419	51.637
609	37.656	18.084	32.197	29.885	28.061	29.557	25.253	21.256	33.986	29.059	29.398	51.578
609.5	37.708	18.073	32.211	29.95	28.15	29.536	25.253	21.243	33.929	28.997	29.354	51.644
610	37.735	18.072	32.261	30.064	28.184	29.542	25.221	21.248	33.889	28.955	29.299	51.691
610.5	37.695	18.09	32.256	30.146	28.138	29.514	25.163	21.222	33.771	28.946	29.282	51.575
611	37.727	18.094	32.246	30.179	28.058	29.468	25.132	21.194	33.742	28.924	29.258	51.459
611.5	37.614	18.117	32.172	30.157	27.987	29.432	25.146	21.208	33.756	28.871	29.302	51.551
612	37.552	18.115	32.138	30.152	27.9	29.354	25.14	21.186	33.782	28.828	29.411	51.566
612.5	37.431	18.109	32.201	30.252	27.794	29.275	25.128	21.083	33.816	28.794	29.492	51.436
613	37.325	18.13	32.334	30.289	27.715	29.246	25.141	20.994	33.759	28.821	29.548	51.375
613.5	37.205	18.055	32.405	30.221	27.608	29.328	25.204	20.967	33.696	28.773	29.464	51.269
614	37.131	18.081	32.317	30.18	27.599	29.433	25.283	21.092	33.582	28.694	29.318	51.244
614.5	37.098	18.059	32.22	30.132	27.588	29.516	25.313	21.172	33.478	28.559	29.236	51.157
615	37.12	18.054	32.189	30.107	27.694	29.45	25.227	21.177	33.473	28.51	29.178	51.189
615.5	37.216	17.927	32.182	30.042	27.693	29.345	25.09	21.1	33.481	28.55	29.184	51.495
616	37.319	17.758	32.121	30.006	27.67	29.21	24.923	21.016	33.541	28.598	29.093	51.735
616.5	37.394	17.685	32.133	30.097	27.605	29.143	24.911	20.983	33.464	28.571	29.085	51.864
617	37.295	17.738	32.181	30.191	27.635	29.114	24.955	20.985	33.425	28.515	29.085	51.756
617.5	37.111	17.78	32.213	30.256	27.68	29.119	25.056	20.984	33.417	28.467	29.121	51.537
618	36.986	17.772	32.139	30.275	27.663	29.18	25.127	20.971	33.46	28.46	29.114	51.302
618.5	37.003	17.765	32.065	30.252	27.553	29.283	25.159	20.986	33.478	28.428	29.141	51.164
619	36.874	17.826	32.034	30.224	27.469	29.322	25.148	20.977	33.413	28.357	29.147	50.915
619.5	36.666	17.869	32.051	30.248	27.483	29.315	25.121	20.962	33.392	28.264	29.187	50.818
620	36.476	17.816	32.15	30.305	27.467	29.314	25.071	20.915	33.363	28.203	29.235	50.782
620.5	36.513	17.722	32.193	30.282	27.476	29.359	25	20.94	33.311	28.179	29.303	51.007
621	36.519	17.659	32.135	30.218	27.435	29.401	24.968	21.013	33.248	28.218	29.222	51.2
621.5	36.515	17.64	32.042	30.239	27.403	29.386	25.044	21.068	33.22	28.245	29.075	51.156
622	36.403	17.611	32.02	30.331	27.403	29.327	25.105	21.049	33.248	28.19	28.894	51.036
622.5	36.467	17.617	32.119	30.466	27.437	29.27	25.139	20.985	33.248	28.107	28.854	50.693
623	36.53	17.663	32.13	30.444	27.473	29.208	25.125	20.909	33.188	27.984	28.865	50.499
623.5	36.592	17.795	32.057	30.396	27.475	29.157	25.152	20.882	33.133	27.989	28.955	50.333
624	36.617	17.873	32.018	30.29	27.473	29.165	25.151	20.918	33.113	28.032	29.039	50.174
624.5	36.629	17.883	32.013	30.216	27.518	29.272	25.137	20.986	33.15	28.142	29.085	50.49
625	36.655	17.853	32.05	30.231	27.61	29.347	25.13	20.995	33.163	28.193	29.028	50.828
625.5	36.622	17.824	32.023	30.371	27.604	29.403	25.182	20.957	33.224	28.152	28.96	51.279
626	36.621	17.821	32.007	30.483	27.508	29.363	25.193	20.917	33.206	28.176	28.936	51.286
626.5	36.635	17.764	31.992	30.469	27.398	29.295	25.145	20.898	33.202	28.269	29.01	51.098
627	36.684	17.752	32.016	30.352	27.365	29.208	25.088	20.858	33.146	28.392	29.076	50.998
627.5	36.621	17.772	32.172	30.281	27.435	29.137	25.08	20.803	33.148	28.383	29.066	50.93
628	36.594	17.855	32.251	30.334	27.49	29.164	25.105	20.806	33.173	28.306	29.009	50.963
628.5	36.499	17.852	32.339	30.341	27.43	29.218	25.147	20.84	33.207	28.214	28.997	50.989
629	36.404	17.799	32.294	30.354	27.401	29.293	25.173	20.877	33.29	28.149	29.039	50.967
629.5	36.441	17.703	32.207	30.353	27.407	29.321	25.188	20.886	33.394	28.17	29.157	50.712
630	36.512	17.725	32.136	30.446	27.498	29.357	25.218	20.873	33.402	28.203	29.189	50.582
630.5	36.603	17.776	32.139	30.578	27.532	29.378	25.246	20.866	33.37	28.228	29.169	50.685
631	36.628	17.874	32.259	30.7	27.542	29.434	25.276	20.857	33.371	28.213	29.129	51.073
631.5	36.606	17.895	32.23	30.736	27.524	29.483	25.271	20.879	33.412	28.231	29.159	51.19
632	36.664	17.9	32.177	30.729	27.494	29.508	25.263	20.887	33.412	28.279	29.213	51.1
632.5	36.711	17.847	32.155	30.637	27.457	29.558	25.244	20.866	33.34	28.314	29.213	50.793
633	36.754	17.727	32.23	30.702	27.398	29.589	25.237	20.791	33.306	28.244	29.183	50.318
633.5	36.709	17.698	32.221	30.798	27.327	29.644	25.209	20.736	33.31	28.138	29.114	50.075
634	36.639	17.771	32.301	30.999	27.464	29.617	25.19	20.697	33.34	28.075	29.046	49.814
634.5	36.537	17.858	32.377	31.054	27.622	29.568	25.166	20.716	33.339	28.008	28.952	49.917
635	36.428	17.774	32.397	30.983	27.717	29.53	25.195	20.725	33.333	27.943	28.886	49.98
635.5	36.3	17.689	32.315	30.912	27.599	29.492	25.206	20.751	33.243	27.821	28.821	50.256
636	36.213	17.65	32.217	30.892	27.453	29.517	25.233	20.771	33.237	27.718	28.762	50.532
636.5	36.145	17.707	32.26	30.952	27.381	29.543	25.212	20.776	33.262	27.713	28.788	50.581
637	36.188	17.654	32.267	30.982	27.362	29.538	25.169	20.748	33.371	27.764	28.846	50.544
637.5	36.27	17.683	32.288	30.941	27.405	29.448	25.113	20.688	33.307	27.811	28.934	50.625
638	36.286	17.708	32.281	30.934	27.464	29.344	25.085	20.669	33.248	27.769	28.921	50.646
638.5	36.204	17.758	32.232	30.923	27.428	29.268	25.134	20.654	33.098	27.628	28.806	50.503
639	36.106	17.68	32.167	30.961	27.369	29.2	25.196	20.697	33.079	27.514	28.683	50.299
639.5	36.138	17.613	32.098	30.958	27.409	29.122	25.196	20.724	33.03	27.434	28.517	50.255
640	36.025	17.574	32.033	30.947	27.527	29.069	25.176	20.778	33.026	27.461	28.487	50.089
640.5	35.82	17.591	31.924	30.935	27.58	29.102	25.189	20.79	32.931	27.459	28.44	49.624
641	35.637	17.578	31.797	30.981	27.474	29.181	25.278	20.799	32.791	27.382	28.37	49.105
641.5	35.655	17.486	31.665	31.053	27.203	29.188	25.251	20.735	32.65	27.228	28.258	48.974
642	35.61	17.387	31.547	31.073	26.991	29.12	25.147	20.628	32.601	27.031	28.099	48.997
642.5	35.476	17.319	31.485	31.021	26.863	28.947	24.967	20.479	32.633	26.912	27.967	49.192
643	35.404	17.334	31.546	31.015	26.974	28.843	24.857	20.394	32.656	26.834	27.858	49.235
643.5	35.328	17.443	31.697	31.133	27.088	28.756	24.76	20.344	32.619	26.832	27.783	49.189
644	35.174	17.499	31.714	31.244	27.15	28.673	24.689	20.265	32.505	26.852	27.74	48.846
644.5	34.885	17.534	31.655	31.312	27.178	28.634	24.669	20.185	32.386	26.767	27.672	48.344
645	34.657	17.396	31.494	31.256	27.065	28.546	24.63	20.096	32.286	26.601	27.519	48.061
645.5	34.671	17.306	31.488	31.194	26.884	28.471	24.586	20.044	32.166	26.336	27.353	48.047
646	34.703	17.225	31.41	31.038	26.666	28.419	24.531	20.042	32.092	26.222	27.25	48.44
646.5	34.648	17.241	31.373	30.976	26.591	28.409	24.501	20.067	31.998	26.206	27.215	48.731
647	34.525	17.161	31.264	31.005	26.497	28.387	24.492	20.068	31.951	26.265	27.253	48.731
647.5	34.309	17.025	31.107	31.097	26.338	28.282	24.475	20.03	31.83	26.231	27.224	48.408
648	34.168	16.855	31.012	31.181	26.185	28.197	24.454	19.979	31.794	26.137	27.099	48.063
648.5	34.107	16.85	30.995	31.175	26.166	28.186	24.45	19.933	31.835	26.04	26.918	47.931
649	34.124	16.895	30.983	31.057	26.146	28.198	24.406	19.896	31.826	25.895	26.725	48.027
649.5	34.187	16.937	30.984	30.969	26.143	28.165	24.359	19.879	31.743	25.873	26.627	48.266
650	34.166	16.959	30.959	30.927	26.154	28.131	24.327	19.874	31.592	25.911	26.606	48.405
650.5	34.072	16.97	31.022	31.002	26.15	28.104	24.357	19.865	31.51	26.019	26.585	48.095
651	33.925	16.98	31.064	31.05	26.056	28.087	24.408	19.868	31.43	25.951	26.559	47.43
651.5	33.739	16.957	31.084	31.116	25.936	28.053	24.37	19.952	31.334	25.853	26.533	47
652	33.66	16.936	31.083	31.254	25.952	28.019	24.282	20.02	31.279	25.764	26.447	47.054
652.5	33.698	16.921	31.018	31.339	26.033	28.017	24.186	20.032	31.304	25.783	26.404	47.359
653	33.788	16.985	30.978	31.356	26.095	28.038	24.142	19.901	31.34	25.817	26.393	47.246
653.5	33.78	16.988	31.018	31.283	26.128	28.04	24.109	19.763	31.353	25.707	26.475	47.032
654	33.7	16.962	31.125	31.218	26.097	28.007	24.052	19.677	31.309	25.52	26.51	46.816
654.5	33.571	16.886	31.214	31.154	26.055	27.973	23.972	19.681	31.177	25.328	26.527	46.728
655	33.34	16.862	31.232	31.093	25.975	27.944	23.855	19.685	31.028	25.284	26.545	46.772
655.5	33.15	16.862	31.206	30.964	25.925	27.96	23.76	19.689	30.916	25.293	26.501	46.841
656	33.041	16.79	31.183	30.912	25.905	28.027	23.693	19.708	30.891	25.314	26.356	47.263
656.5	33.088	16.682	31.148	30.887	25.847	28.108	23.613	19.709	30.888	25.256	26.202	47.484
657	32.97	16.58	31.073	30.918	25.683	28.114	23.498	19.672	30.809	25.173	26.119	47.818
657.5	32.857	16.544	31.002	30.875	25.493	27.976	23.376	19.608	30.715	25.092	26.06	47.646
658	32.734	16.543	30.938	30.856	25.396	27.824	23.281	19.591	30.629	25.006	25.958	47.555
658.5	32.725	16.58	30.903	30.879	25.432	27.75	23.199	19.579	30.483	24.877	25.856	47.277
659	32.551	16.524	30.771	30.852	25.438	27.682	23.107	19.577	30.321	24.7	25.851	47.285
659.5	32.274	16.478	30.594	30.769	25.394	27.564	23.018	19.602	30.109	24.591	25.787	47.158
660	32.069	16.434	30.479	30.746	25.34	27.424	23.011	19.641	29.928	24.474	25.698	46.951
660.5	31.945	16.511	30.457	30.803	25.271	27.356	22.987	19.659	29.77	24.371	25.571	46.671
661	31.859	16.585	30.512	30.847	25.124	27.351	22.92	19.628	29.599	24.339	25.483	46.48
661.5	31.751	16.602	30.475	30.761	24.864	27.28	22.799	19.593	29.424	24.327	25.371	46.396
662	31.641	16.544	30.363	30.637	24.671	27.214	22.721	19.551	29.209	24.197	25.192	46.47
662.5	31.609	16.5	30.219	30.539	24.544	27.104	22.677	19.517	29.02	23.973	25.022	46.586
663	31.45	16.477	30.151	30.537	24.567	27.023	22.57	19.513	28.868	23.799	24.919	46.56
663.5	31.332	16.452	30.21	30.547	24.493	26.869	22.399	19.51	28.735	23.823	24.851	46.131
664	31.218	16.354	30.238	30.535	24.427	26.724	22.23	19.471	28.567	23.888	24.833	45.685
664.5	31.089	16.271	30.12	30.496	24.303	26.592	22.107	19.386	28.371	23.822	24.717	45.467
665	30.904	16.264	29.994	30.454	24.251	26.464	22.017	19.251	28.103	23.617	24.514	45.468
665.5	30.717	16.318	29.984	30.4	24.112	26.336	21.95	19.202	27.902	23.378	24.214	45.364
666	30.597	16.358	30.077	30.253	23.957	26.233	21.898	19.23	27.671	23.285	23.999	45.247
666.5	30.484	16.277	30.016	30.14	23.782	26.163	21.862	19.339	27.544	23.317	23.925	45.13
667	30.332	16.196	29.909	30.031	23.651	26.075	21.817	19.384	27.42	23.314	23.863	45.209
667.5	30.196	16.124	29.853	29.984	23.527	25.936	21.693	19.319	27.415	23.27	23.895	45.458
668	30.092	16.106	29.82	29.964	23.41	25.763	21.557	19.242	27.322	23.117	23.887	45.595
668.5	29.966	16.058	29.793	29.945	23.352	25.625	21.442	19.163	27.246	23.008	23.835	45.369
669	29.762	16.001	29.668	29.929	23.31	25.561	21.395	19.143	27.083	22.932	23.656	44.892
669.5	29.547	16.012	29.601	29.886	23.286	25.605	21.366	19.101	26.98	22.893	23.488	44.503
670	29.427	16.036	29.51	29.844	23.209	25.614	21.353	19.08	26.836	22.83	23.379	44.528
670.5	29.403	15.975	29.388	29.735	23.1	25.562	21.33	19.041	26.706	22.828	23.349	44.442
671	29.432	15.865	29.323	29.599	23.03	25.468	21.345	19.104	26.624	22.893	23.294	44.412
671.5	29.441	15.813	29.281	29.501	23.032	25.433	21.328	19.167	26.578	22.951	23.271	44.078
672	29.441	15.818	29.342	29.435	23.067	25.467	21.312	19.169	26.607	22.948	23.195	43.99
672.5	29.386	15.823	29.342	29.462	23.051	25.403	21.215	19.061	26.526	22.954	23.164	44.388
673	29.287	15.805	29.37	29.513	22.973	25.312	21.202	18.987	26.393	23.001	23.158	44.88
673.5	29.242	15.826	29.447	29.625	22.89	25.249	21.24	19.016	26.256	23.042	23.249	45.21
674	29.216	15.871	29.618	29.715	22.925	25.366	21.35	19.152	26.236	22.909	23.254	45.261
674.5	29.205	15.954	29.721	29.717	23.034	25.451	21.376	19.267	26.308	22.738	23.257	45.391
675	29.059	16.035	29.718	29.738	23.152	25.452	21.385	19.311	26.372	22.625	23.165	45.301
675.5	28.903	16.087	29.594	29.7	23.11	25.379	21.371	19.266	26.409	22.658	23.133	44.842
676	28.701	16.07	29.507	29.687	23.046	25.373	21.372	19.22	26.352	22.764	23.089	44.448
676.5	28.69	16.075	29.519	29.605	23.002	25.395	21.375	19.186	26.298	22.847	23.114	44.428
677	28.805	16.097	29.595	29.549	23.074	25.455	21.449	19.157	26.238	22.903	23.216	44.529
677.5	28.973	16.128	29.656	29.508	23.099	25.541	21.491	19.116	26.294	22.849	23.324	44.632
678	28.98	16.084	29.668	29.507	23.005	25.644	21.504	19.119	26.339	22.768	23.425	44.521
678.5	28.981	16.034	29.653	29.591	22.872	25.713	21.478	19.187	26.419	22.759	23.484	44.641
679	29.057	16.059	29.764	29.83	22.889	25.759	21.526	19.238	26.403	22.803	23.639	44.503
679.5	29.169	16.217	29.895	30.075	23.078	25.896	21.603	19.249	26.442	22.889	23.795	44.713
680	29.147	16.309	29.977	30.121	23.216	26.079	21.655	19.204	26.494	22.911	23.903	44.831
680.5	29.241	16.385	30.071	30.095	23.339	26.226	21.702	19.179	26.616	22.866	23.897	44.983
681	29.427	16.405	30.265	30.158	23.469	26.294	21.769	19.218	26.764	22.842	24.012	44.965
681.5	29.601	16.495	30.502	30.415	23.562	26.405	21.885	19.319	26.926	22.931	24.242	44.949
682	29.692	16.531	30.648	30.672	23.606	26.609	22.076	19.454	27.151	23.154	24.568	45.158
682.5	29.83	16.657	30.872	30.81	23.684	26.905	22.253	19.58	27.281	23.316	24.839	45.376
683	30.01	16.789	31.139	30.951	23.918	27.255	22.468	19.676	27.463	23.495	25.109	45.554
683.5	30.298	16.951	31.449	31.185	24.138	27.643	22.697	19.776	27.683	23.669	25.43	45.655
684	30.608	16.99	31.581	31.471	24.253	27.975	22.947	19.867	27.995	23.842	25.703	45.775
684.5	30.905	17.051	31.718	31.768	24.337	28.243	23.12	19.965	28.351	23.969	26.081	46.28
685	31.071	17.085	31.853	31.958	24.438	28.53	23.199	20.049	28.77	24.112	26.465	46.89
685.5	31.32	17.208	32.137	32.264	24.735	28.954	23.297	20.081	29.245	24.239	26.909	47.327
686	31.631	17.302	32.388	32.483	25.069	29.44	23.524	20.096	29.649	24.342	27.297	47.645
686.5	32.091	17.431	32.657	32.799	25.409	29.946	23.843	20.135	30.02	24.506	27.733	47.915
687	32.54	17.578	32.908	33.054	25.642	30.47	24.185	20.239	30.404	24.768	28.191	48.303
687.5	33.014	17.778	33.251	33.473	25.974	31.012	24.466	20.381	30.835	25.077	28.723	48.471
688	33.442	18.023	33.536	33.841	26.396	31.561	24.685	20.551	31.297	25.398	29.317	48.846
688.5	33.906	18.221	33.797	34.196	26.898	32.165	24.891	20.774	31.726	25.82	29.96	49.343
689	34.518	18.466	34.045	34.48	27.315	32.732	25.126	21.002	32.159	26.241	30.624	49.785
689.5	35.263	18.739	34.434	34.849	27.792	33.268	25.423	21.183	32.547	26.537	31.226	49.973
690	35.932	19.044	34.837	35.332	28.224	33.745	25.67	21.297	33.012	26.872	31.887	50.124
690.5	36.398	19.313	35.149	35.814	28.644	34.239	25.898	21.417	33.406	27.236	32.546	50.471
691	36.566	19.624	35.313	36.199	28.955	34.801	26.101	21.573	33.858	27.706	33.329	50.579
691.5	36.93	19.893	35.452	36.4	29.223	35.409	26.332	21.767	34.388	28.036	34.072	51.112
692	37.542	20.24	35.699	36.533	29.591	36.104	26.528	22.026	35.023	28.323	34.777	51.648
692.5	38.254	20.576	35.944	36.756	29.988	36.707	26.784	22.315	35.536	28.546	35.324	52.252
693	38.949	20.954	36.222	36.991	30.353	37.212	27.009	22.643	35.94	28.86	35.91	52.159
693.5	39.41	21.298	36.459	37.293	30.705	37.599	27.217	22.94	36.29	29.177	36.538	52.097
694	39.761	21.592	36.755	37.613	31.171	38.075	27.434	23.206	36.73	29.52	37.106	52.37
694.5	40.189	21.854	36.875	37.907	31.659	38.634	27.641	23.45	37.2	29.866	37.642	52.881
695	40.824	22.124	37.076	38.119	32.065	39.259	27.829	23.7	37.72	30.305	38.168	53.208
695.5	41.522	22.349	37.234	38.213	32.304	39.835	27.999	24.009	38.146	30.753	38.777	53.537
696	42.075	22.589	37.34	38.372	32.542	40.36	28.241	24.266	38.489	31.125	39.324	53.829
696.5	42.447	22.801	37.483	38.597	32.721	40.782	28.478	24.607	38.746	31.41	39.826	54.19
697	42.802	23.169	37.759	38.901	33.051	41.135	28.635	24.947	39.11	31.707	40.353	54.125
697.5	43.173	23.554	38.175	39.133	33.478	41.435	28.763	25.357	39.564	32.018	40.819	53.955
698	43.681	23.896	38.302	39.237	33.866	41.777	28.93	25.719	39.981	32.351	41.301	54.109
698.5	44.161	24.23	38.301	39.346	34.224	42.208	29.13	26.07	40.286	32.643	41.76	54.727
699	44.452	24.48	38.314	39.479	34.467	42.759	29.304	26.4	40.453	32.93	42.265	55.502
699.5	44.774	24.724	38.572	39.75	34.709	43.223	29.397	26.654	40.645	33.242	42.724	55.861
700	45.126	24.853	38.874	39.941	34.817	43.632	29.445	26.98	40.883	33.503	43.104	55.624
700.5	45.558	25.104	39.029	40.022	34.912	43.969	29.475	27.381	41.224	33.704	43.473	55.187
701	46.022	25.397	39.023	40.142	35.068	44.282	29.533	27.8	41.591	33.879	43.913	55.075
701.5	46.38	25.737	39.006	40.25	35.292	44.536	29.603	28.09	41.888	34.135	44.287	55.539
702	46.62	26.024	39.03	40.389	35.56	44.797	29.72	28.33	42.061	34.403	44.656	55.886
702.5	46.766	26.197	39.089	40.359	35.839	45.126	29.844	28.628	42.212	34.656	44.991	56.087
703	46.978	26.335	39.141	40.38	36.059	45.42	29.987	28.919	42.347	34.874	45.465	56.214
703.5	47.26	26.466	39.275	40.495	36.248	45.748	30.106	29.205	42.543	35.078	45.836	56.607
704	47.535	26.67	39.355	40.675	36.475	46.002	30.184	29.47	42.77	35.239	46.08	57
704.5	47.832	26.849	39.427	40.877	36.615	46.169	30.206	29.713	43.097	35.382	46.275	57.499
705	48.153	26.917	39.402	40.916	36.66	46.298	30.241	29.976	43.387	35.542	46.513	57.664
705.5	48.356	27.119	39.396	40.998	36.719	46.55	30.376	30.339	43.558	35.735	46.809	57.492
706	48.439	27.354	39.491	41.159	36.967	46.901	30.594	30.76	43.66	35.94	47.101	57.233
706.5	48.517	27.637	39.688	41.345	37.252	47.18	30.765	31.09	43.817	36.106	47.386	57.134
707	48.719	27.835	39.847	41.41	37.347	47.311	30.801	31.253	43.923	36.197	47.601	57.094
707.5	48.971	28.09	39.936	41.419	37.334	47.429	30.782	31.415	44.083	36.327	47.714	57.225
708	49.091	28.3	39.952	41.432	37.354	47.549	30.78	31.619	44.259	36.47	47.838	57.411
708.5	49.029	28.404	40.018	41.425	37.502	47.671	30.803	31.778	44.453	36.551	47.919	57.587
709	49.158	28.487	40.002	41.393	37.746	47.785	30.83	31.933	44.501	36.621	47.975	57.631
709.5	49.394	28.675	40.136	41.485	37.911	48.006	30.867	32.107	44.438	36.746	48.096	57.518
710	49.583	28.858	40.217	41.557	37.988	48.255	30.909	32.376	44.456	36.962	48.4	57.302
710.5	49.631	28.969	40.261	41.618	38.101	48.441	30.919	32.616	44.613	37.164	48.776	57.215
711	49.719	28.952	40.16	41.664	38.194	48.685	30.938	32.908	44.865	37.326	48.967	57.484
711.5	49.916	29.054	40.142	41.912	38.297	48.938	30.978	33.164	45.06	37.38	48.972	57.997
712	50.055	29.223	40.107	42.139	38.38	49.128	31.035	33.417	45.182	37.435	49.077	58.335
712.5	50.208	29.371	40.215	42.245	38.503	49.141	31.106	33.595	45.315	37.496	49.232	58.288
713	50.392	29.503	40.475	42.176	38.661	49.175	31.211	33.743	45.426	37.675	49.5	58.058
713.5	50.414	29.647	40.675	42.143	38.763	49.24	31.289	33.907	45.461	37.819	49.743	57.928
714	50.463	29.844	40.68	42.128	38.923	49.296	31.271	34.044	45.425	37.964	49.98	58.082
714.5	50.489	29.937	40.552	42.133	39.032	49.338	31.222	34.172	45.392	38.068	50.115	58.215
715	50.743	30.042	40.594	42.185	39.218	49.542	31.219	34.276	45.502	38.097	50.26	58.117
715.5	50.776	30.133	40.638	42.33	39.435	49.79	31.294	34.48	45.678	38.08	50.416	58.196
716	50.894	30.188	40.666	42.436	39.533	50.042	31.337	34.688	45.749	38.064	50.524	58.299
716.5	50.959	30.33	40.697	42.485	39.506	50.236	31.427	34.933	45.745	38.136	50.538	58.62
717	51.147	30.497	40.749	42.436	39.402	50.479	31.612	35.193	45.797	38.269	50.675	58.88
717.5	51.247	30.629	40.758	42.346	39.416	50.651	31.67	35.43	46.038	38.333	50.792	59.23
718	51.353	30.649	40.701	42.297	39.426	50.757	31.646	35.626	46.21	38.468	50.883	59.115
718.5	51.317	30.661	40.721	42.242	39.418	50.719	31.57	35.727	46.282	38.589	50.889	58.694
719	51.283	30.742	40.763	42.342	39.474	50.697	31.592	35.865	46.206	38.724	50.951	58.393
719.5	51.228	30.847	40.872	42.602	39.624	50.805	31.561	35.939	46.183	38.847	51.191	58.576
720	51.272	30.982	40.851	42.817	39.7	50.968	31.593	36.001	46.234	38.923	51.526	58.983
720.5	51.288	30.995	40.831	42.763	39.649	51.014	31.702	36.08	46.328	38.918	51.769	59.399
721	51.264	31.001	40.836	42.617	39.576	51.041	31.794	36.246	46.409	38.86	51.822	59.516
721.5	51.324	31.058	40.939	42.623	39.619	51.018	31.664	36.42	46.527	39.016	51.857	59.26
722	51.353	31.127	40.998	42.756	39.745	51.118	31.583	36.517	46.684	39.099	51.847	59.094
722.5	51.319	31.187	41.051	42.738	39.853	51.199	31.648	36.576	46.753	39.068	51.883	59.139
723	51.243	31.325	41.232	42.722	39.983	51.347	31.852	36.713	46.805	38.987	52.008	59.276
723.5	51.268	31.598	41.31	42.831	40.136	51.431	31.906	36.892	46.845	39.113	52.181	59.401
724	51.501	31.791	41.299	43.003	40.232	51.536	31.943	37.11	46.878	39.353	52.241	59.559
724.5	51.505	31.768	41.186	43.052	40.104	51.593	31.994	37.292	46.84	39.48	52.174	59.388
725	51.521	31.636	41.177	42.945	39.918	51.663	32.073	37.45	46.884	39.42	52.159	58.774
725.5	51.601	31.623	41.232	42.879	39.941	51.667	32.133	37.545	46.969	39.36	52.202	58.537
726	51.767	31.74	41.216	42.895	40.141	51.644	32.173	37.704	47.06	39.377	52.34	58.937
726.5	51.769	31.896	41.321	42.953	40.361	51.62	32.191	37.87	47.152	39.519	52.622	59.435
727	51.541	32.057	41.399	42.947	40.421	51.641	32.175	38.003	47.185	39.616	52.802	59.499
727.5	51.362	32.177	41.531	42.971	40.522	51.739	32.152	38.088	47.125	39.761	52.85	59.257
728	51.4	32.227	41.491	42.927	40.624	51.81	32.167	38.196	47.222	39.791	52.768	58.994
728.5	51.579	32.118	41.5	42.945	40.684	51.914	32.206	38.292	47.432	39.755	52.798	58.909
729	51.66	32.124	41.511	43.121	40.686	52.076	32.271	38.385	47.62	39.692	52.828	59.015
729.5	51.621	32.157	41.463	43.338	40.73	52.31	32.37	38.58	47.595	39.609	52.765	59.386
730	51.65	32.294	41.347	43.317	40.787	52.467	32.426	38.776	47.603	39.628	52.796	59.823
730.5	51.795	32.33	41.314	43.187	40.773	52.458	32.438	38.851	47.59	39.604	52.87	59.895
731	51.773	32.369	41.356	43.23	40.703	52.361	32.443	38.836	47.592	39.684	52.957	59.562
731.5	51.676	32.402	41.409	43.377	40.684	52.278	32.411	38.867	47.568	39.86	53.043	59.233
732	51.509	32.413	41.501	43.398	40.647	52.326	32.349	38.918	47.537	39.992	53.12	58.98
732.5	51.437	32.452	41.56	43.255	40.611	52.434	32.326	38.961	47.507	40.044	53.241	59.11
733	51.461	32.479	41.618	43.22	40.65	52.493	32.41	38.933	47.469	40.076	53.405	59.365
733.5	51.583	32.572	41.641	43.315	40.836	52.466	32.479	38.955	47.397	40.105	53.434	59.548
734	51.683	32.66	41.616	43.482	41.071	52.461	32.494	39.043	47.387	40.013	53.316	59.427
734.5	51.669	32.744	41.596	43.533	41.181	52.536	32.439	39.235	47.521	39.937	53.226	59.424
735	51.521	32.732	41.735	43.598	41.082	52.577	32.462	39.349	47.481	39.944	53.292	59.573
735.5	51.436	32.786	41.876	43.654	41.036	52.526	32.498	39.388	47.409	39.997	53.336	59.732
736	51.425	32.907	41.953	43.69	41.108	52.471	32.557	39.4	47.428	40.014	53.299	59.702
736.5	51.546	32.993	41.953	43.572	41.188	52.43	32.576	39.418	47.592	40.082	53.29	59.53
737	51.482	32.959	41.999	43.354	41.321	52.479	32.587	39.458	47.716	40.077	53.373	59.174
737.5	51.364	32.846	41.946	43.243	41.338	52.593	32.676	39.559	47.719	40.125	53.575	59.119
738	51.191	32.768	41.812	43.19	41.338	52.739	32.725	39.683	47.677	40.286	53.754	58.998
738.5	51.095	32.678	41.592	43.145	41.241	52.842	32.707	39.833	47.763	40.452	53.859	59.127
739	51.094	32.71	41.542	43.208	41.205	52.872	32.663	39.961	47.962	40.582	53.974	59.308
739.5	51.178	32.811	41.76	43.316	41.166	52.905	32.745	40.108	48.093	40.644	54	59.531
740	51.115	32.955	42.028	43.496	41.221	52.961	32.836	40.186	48.023	40.696	54.042	59.512
740.5	50.977	33.031	42.089	43.621	41.337	52.999	32.881	40.223	47.883	40.684	54.047	59.569
741	50.886	33.037	41.924	43.753	41.359	53.073	32.897	40.217	47.894	40.717	54.183	59.683
741.5	50.883	32.982	41.838	43.76	41.239	53.158	32.919	40.214	47.906	40.706	54.259	59.563
742	50.734	32.965	41.979	43.854	41.228	53.236	33.007	40.333	48.015	40.719	54.366	59.268
742.5	50.531	32.986	42.105	43.934	41.325	53.263	33.077	40.512	47.979	40.746	54.471	59.102
743	50.493	32.984	42.165	43.978	41.389	53.277	33.117	40.625	47.988	40.809	54.417	58.924
743.5	50.585	32.97	42.224	44.034	41.4	53.34	33.113	40.698	47.965	40.781	54.286	58.935
744	50.675	33.064	42.235	44.096	41.334	53.397	33.096	40.696	48.006	40.815	54.112	59.087
744.5	50.674	33.2	42.174	44.219	41.359	53.435	33.044	40.629	48.034	40.899	54.166	59.43
745	50.673	33.266	42.138	44.13	41.421	53.45	33.074	40.549	48.065	40.955	54.217	59.696
745.5	50.604	33.21	42.094	43.998	41.481	53.468	33.108	40.622	48.176	40.96	54.263	59.786
746	50.599	33.102	41.966	43.828	41.283	53.474	33.061	40.749	48.29	41.023	54.373	59.559
746.5	50.642	32.974	41.894	43.77	41.106	53.348	32.949	40.841	48.376	41.087	54.44	59.047
747	50.678	32.894	41.943	43.807	41.058	53.232	32.964	40.904	48.232	41.119	54.323	58.99
747.5	50.587	33.047	42.106	43.951	41.117	53.023	33.002	40.897	48.138	41.124	54.098	59.166
748	50.559	33.262	42.182	44.133	41.177	53.061	33.113	40.948	48.26	41.152	54.186	59.18
748.5	50.547	33.335	42.216	44.203	41.262	53.203	33.293	41.031	48.444	41.126	54.426	58.947
749	50.541	33.322	42.164	44.116	41.35	53.32	33.47	41.071	48.432	41.098	54.511	58.831
749.5	50.442	33.267	42.082	43.904	41.286	53.331	33.531	41.048	48.305	41.155	54.403	59.022
750	50.347	33.317	41.963	43.838	41.154	53.352	33.483	41.09	48.297	41.209	54.224	59.493
750.5	50.219	33.318	42.052	43.874	41.022	53.403	33.499	41.269	48.313	41.368	54.23	59.941
751	50.18	33.29	42.321	44.012	41.058	53.401	33.523	41.415	48.377	41.452	54.329	59.998
751.5	50.158	33.245	42.539	44.056	41.239	53.338	33.576	41.461	48.395	41.478	54.437	59.728
752	50.084	33.309	42.47	44.099	41.392	53.292	33.587	41.463	48.363	41.434	54.475	59.45
752.5	49.981	33.354	42.261	44.19	41.366	53.268	33.463	41.438	48.208	41.368	54.458	59.162
753	49.807	33.326	42.226	44.289	41.281	53.306	33.432	41.501	48.257	41.362	54.444	58.954
753.5	49.773	33.305	42.343	44.392	41.306	53.426	33.577	41.599	48.295	41.303	54.427	58.911
754	49.905	33.35	42.406	44.271	41.349	53.552	33.796	41.698	48.332	41.307	54.456	59.002
754.5	50.028	33.406	42.37	44.162	41.46	53.605	33.838	41.796	48.325	41.356	54.511	58.949
755	50.011	33.399	42.334	44.041	41.534	53.555	33.679	41.93	48.286	41.47	54.52	58.928
755.5	49.945	33.432	42.414	44.114	41.485	53.435	33.556	42.087	48.35	41.687	54.539	58.96
756	49.791	33.575	42.488	44.182	41.539	53.328	33.581	42.083	48.417	41.882	54.612	59.453
756.5	49.608	33.706	42.426	44.218	41.472	53.338	33.663	41.913	48.423	41.981	54.688	59.672
757	49.541	33.685	42.318	44.155	41.386	53.467	33.774	41.799	48.391	42.005	54.888	59.496
757.5	49.595	33.609	42.33	44.187	41.322	53.624	33.908	41.868	48.445	41.919	54.908	59.264
758	49.593	33.7	42.424	44.28	41.498	53.767	34.074	42.056	48.504	41.776	54.914	59.451
758.5	49.598	33.742	42.554	44.271	41.637	53.853	34.114	42.119	48.559	41.691	54.792	59.447
759	49.583	33.65	42.567	44.011	41.681	54.083	34.175	42.104	48.682	41.806	54.727	59.304
759.5	49.562	33.6	42.633	43.886	41.688	54.12	34.219	42.194	48.697	41.958	54.584	59.128
760	49.401	33.629	42.561	43.956	41.585	54.011	34.242	42.358	48.538	42.073	54.41	59.105
760.5	49.243	33.567	42.502	44.096	41.377	53.853	34.259	42.53	48.37	42.156	54.413	59.134
761	49.192	33.526	42.489	44.192	41.254	53.821	34.367	42.638	48.334	42.275	54.576	59.11
761.5	49.129	33.542	42.655	44.361	41.471	53.777	34.496	42.624	48.427	42.347	54.805	58.937
762	49.031	33.584	42.701	44.4	41.487	53.711	34.654	42.619	48.525	42.324	54.738	59.072
762.5	48.96	33.564	42.686	44.35	41.474	53.673	34.692	42.572	48.693	42.246	54.673	59.54
763	49.11	33.585	42.516	44.246	41.434	53.717	34.701	42.555	48.754	42.205	54.597	60.309
763.5	49.295	33.639	42.361	44.172	41.451	53.785	34.609	42.544	48.728	42.218	54.555	60.813
764	49.303	33.61	42.272	44.269	41.373	53.826	34.548	42.592	48.608	42.322	54.496	60.888
764.5	49.217	33.588	42.442	44.315	41.381	53.867	34.482	42.604	48.533	42.434	54.615	60.411
765	48.986	33.508	42.703	44.377	41.494	53.966	34.582	42.73	48.542	42.299	54.657	60.061
765.5	48.991	33.536	42.785	44.304	41.544	54.026	34.663	42.866	48.601	42.251	54.778	60.018
766	48.886	33.601	42.833	44.29	41.558	54.055	34.779	42.933	48.643	42.285	54.754	60.067
766.5	48.79	33.67	42.843	44.286	41.556	54.043	34.854	42.942	48.581	42.48	54.749	60.058
767	48.788	33.576	42.811	44.381	41.558	54.009	34.905	42.996	48.529	42.567	54.767	59.931
767.5	48.749	33.523	42.708	44.374	41.588	53.964	34.918	43.018	48.651	42.627	54.788	59.546
768	48.672	33.574	42.595	44.379	41.555	53.993	34.959	43.003	48.823	42.58	54.858	59.335
768.5	48.577	33.563	42.542	44.356	41.439	54.101	35.072	43.071	48.879	42.578	54.92	59.497
769	48.727	33.578	42.519	44.5	41.551	54.001	35.069	43.107	48.89	42.602	54.967	59.565
769.5	48.787	33.569	42.479	44.526	41.531	53.939	35.074	43.107	48.994	42.609	54.909	59.539
770	48.731	33.61	42.493	44.43	41.386	53.91	35.136	43.134	49.008	42.658	54.79	59.551
770.5	48.574	33.678	42.576	44.304	41.4	53.926	35.184	43.229	48.926	42.806	54.826	59.636
771	48.368	33.675	42.684	44.173	41.647	53.982	35.196	43.391	48.819	42.932	54.824	59.532
771.5	48.152	33.634	42.827	44.226	41.811	54.006	35.252	43.568	48.848	42.915	54.827	59.45
772	48.218	33.611	43.058	44.4	41.829	53.995	35.435	43.689	48.844	42.917	54.85	59.575
772.5	48.353	33.595	43.092	44.529	41.924	53.916	35.457	43.688	48.883	43.026	54.941	59.578
773	48.376	33.531	43.015	44.608	41.961	53.928	35.441	43.674	49.049	43.104	55.018	59.725
773.5	48.192	33.553	42.973	44.604	41.97	54.025	35.439	43.707	49.201	43.089	55.076	59.759
774	47.996	33.714	42.928	44.604	41.925	54.155	35.464	43.737	49.183	43.146	55.082	59.829
774.5	48.031	33.786	42.817	44.597	41.865	54.273	35.467	43.708	49.111	43.317	55.106	59.733
775	48.079	33.759	42.65	44.642	41.671	54.25	35.482	43.624	49.023	43.429	55.083	59.562
775.5	48.027	33.68	42.676	44.512	41.551	54.288	35.711	43.733	48.935	43.556	55.13	59.439
776	47.834	33.848	42.719	44.397	41.696	54.142	35.82	43.874	48.817	43.56	55.013	59.153
776.5	47.933	33.953	42.81	44.44	41.927	54.134	35.904	43.945	48.779	43.589	54.952	59.205
777	48.002	33.945	42.928	44.603	41.937	54.145	35.954	43.936	48.772	43.519	54.946	59.549
777.5	48.05	33.807	43.172	44.776	41.947	54.253	36.023	43.884	48.938	43.475	54.994	59.651
778	48.008	33.656	43.217	44.755	41.988	54.302	36.098	43.955	49.052	43.381	54.997	59.493
778.5	48.102	33.534	42.996	44.69	41.993	54.35	36.188	44.115	49.083	43.419	54.995	59.229
779	48.021	33.525	42.875	44.654	41.93	54.249	36.155	44.223	49.065	43.513	54.864	58.946
779.5	48.032	33.626	42.946	44.68	41.814	54.112	35.923	44.046	49.061	43.67	54.783	58.754
780	47.996	33.715	42.926	44.498	41.679	54.07	35.855	43.987	49.021	43.667	54.743	58.989
780.5	47.996	33.684	42.711	44.341	41.614	54.091	36.048	44.063	49.095	43.686	54.942	59.622
781	47.843	33.596	42.551	44.342	41.614	54.119	36.278	44.19	49.069	43.676	55.091	59.942
781.5	47.657	33.604	42.633	44.513	41.703	54.141	36.406	44.3	49.043	43.694	55.173	59.891
782	47.775	33.679	42.801	44.741	41.767	54.18	36.491	44.375	48.959	43.763	55.187	59.658
782.5	47.926	33.795	42.989	44.935	41.81	54.191	36.533	44.39	49.083	43.954	55.239	59.568
783	48.023	33.886	43.078	44.945	41.778	54.167	36.583	44.355	49.132	44.179	55.305	59.523
783.5	47.793	33.84	43.115	44.826	41.729	54.219	36.619	44.404	49.142	44.233	55.146	59.383
784	47.644	33.681	43.008	44.547	41.505	54.273	36.637	44.425	49.131	44.191	54.992	59.167
784.5	47.69	33.616	42.932	44.439	41.414	54.414	36.709	44.458	49.16	44.239	54.968	59.133
785	47.864	33.633	42.951	44.513	41.454	54.495	36.784	44.474	49.179	44.248	55.149	59.381
785.5	47.842	33.639	43.007	44.606	41.613	54.513	36.833	44.618	49.162	44.373	55.348	59.479
786	47.723	33.609	42.973	44.512	41.648	54.483	36.84	44.775	49.15	44.315	55.293	59.644
786.5	47.636	33.626	42.982	44.5	41.568	54.448	36.852	44.807	49.191	44.427	55.255	59.59
787	47.741	33.651	42.971	44.536	41.492	54.455	36.927	44.68	49.172	44.618	55.316	59.415
787.5	47.972	33.74	43.018	44.606	41.53	54.491	37.018	44.527	49.155	44.714	55.354	58.982
788	48.016	33.751	42.996	44.563	41.701	54.509	37.059	44.507	49.04	44.559	55.209	58.862
788.5	47.887	33.727	43.053	44.627	41.906	54.404	37.027	44.551	48.998	44.528	55.012	58.909
789	47.751	33.635	43.113	44.668	42.128	54.223	37.067	44.627	48.975	44.802	54.967	58.963
789.5	47.777	33.7	43.239	44.802	42.174	54.207	37.174	44.755	49.022	44.969	54.905	58.892
790	47.651	33.727	43.294	44.826	42.173	54.358	37.276	44.789	48.993	44.875	54.808	58.847
790.5	47.468	33.813	43.349	44.921	42.154	54.409	37.213	44.641	48.881	44.712	54.807	59.154
791	47.368	33.901	43.391	44.952	42.186	54.315	37.176	44.553	48.863	44.673	54.96	59.436
791.5	47.383	33.983	43.357	44.885	42.109	54.279	37.286	44.651	48.989	44.736	55.192	59.46
792	47.418	33.974	43.183	44.75	41.975	54.462	37.518	44.9	49.122	44.762	55.214	59.359
792.5	47.467	33.902	43.034	44.704	41.981	54.651	37.675	45.121	49.14	44.756	55.149	59.408
793	47.628	33.859	43.14	44.648	41.962	54.695	37.657	45.262	49.133	44.824	55.068	59.618
793.5	47.642	33.789	43.257	44.744	41.954	54.601	37.629	45.321	49.12	45.067	55.133	59.814
794	47.64	33.774	43.294	44.772	41.905	54.418	37.539	45.259	49.01	45.262	55.122	59.64
794.5	47.526	33.894	43.33	44.851	41.87	54.299	37.503	45.176	49.002	45.253	55.153	59.24
795	47.402	33.998	43.366	44.931	41.868	54.281	37.529	45.212	49.017	45.208	55.253	58.947
795.5	47.181	34.015	43.409	44.992	41.889	54.403	37.612	45.371	49.071	45.332	55.345	58.962
796	47.169	33.858	43.314	44.911	41.934	54.567	37.784	45.538	49.107	45.415	55.323	58.82
796.5	47.334	33.806	43.206	44.918	41.933	54.731	37.976	45.525	49.119	45.515	55.309	58.827
797	47.544	33.865	43.2	44.951	41.946	54.773	38.068	45.334	49.109	45.631	55.335	59.045
797.5	47.593	33.994	43.237	44.901	41.803	54.757	38.029	45.254	49.082	45.688	55.329	59.252
798	47.59	33.987	43.191	44.738	41.685	54.727	37.96	45.361	49.103	45.684	55.224	58.986
798.5	47.481	33.84	43.096	44.77	41.627	54.686	37.963	45.395	49.116	45.691	55.203	58.587
799	47.495	33.612	43.16	44.826	41.543	54.585	38.038	45.319	49.182	45.627	55.071	58.377
799.5	47.554	33.651	43.309	44.969	41.617	54.439	38.205	45.35	49.311	45.689	55.018	58.59
800	47.629	33.83	43.267	44.917	41.631	54.409	38.255	45.564	49.426	45.75	55.051	59.043
800.5	47.62	34.021	43.22	45.086	41.838	54.494	38.232	45.651	49.4	45.862	55.052	59.755
801	47.596	33.983	43.295	44.997	41.932	54.482	38.07	45.612	49.32	45.962	55.031	60.229
801.5	47.575	33.944	43.411	44.937	42.026	54.32	38.07	45.601	49.299	46.05	55.013	60.114
802	47.372	33.776	43.345	44.818	42.004	54.209	38.293	45.646	49.343	46.125	55.155	59.564
802.5	47.22	33.841	43.374	44.929	42.051	54.189	38.534	45.613	49.38	46.101	55.154	59.386
803	47.115	33.967	43.348	44.969	42.113	54.248	38.584	45.555	49.305	46.01	55.126	59.597
803.5	46.974	33.98	43.276	44.956	42.105	54.289	38.491	45.576	49.197	45.994	55.23	59.786
804	47.052	33.823	43.261	44.813	42.021	54.328	38.497	45.61	49.205	46.046	55.221	59.718
804.5	47.275	33.789	43.32	44.768	41.919	54.392	38.593	45.66	49.297	46.226	55.177	59.305
805	47.361	33.968	43.464	44.788	41.861	54.414	38.675	45.701	49.3	46.2	55.102	59.067
805.5	47.276	34.147	43.465	44.828	41.84	54.41	38.655	45.79	49.261	46.198	55.036	58.916
806	47.301	34.136	43.186	44.818	41.67	54.411	38.795	45.875	49.173	46.063	54.834	58.819
806.5	47.286	33.947	42.981	44.813	41.612	54.424	38.928	45.993	49.163	46.027	54.816	58.708
807	47.229	33.817	43.129	44.813	41.72	54.492	39.009	46.047	49.144	46.115	54.87	59.139
807.5	47.194	33.702	43.176	44.691	41.826	54.642	38.938	46.005	49.31	46.42	55.017	59.575
808	47.259	33.809	43.171	44.811	41.877	54.703	38.889	45.912	49.394	46.603	55.112	59.595
808.5	47.322	33.985	43.327	44.976	41.813	54.5	38.827	45.881	49.333	46.794	55.334	59.53
809	47.212	33.989	43.543	45.062	41.726	54.349	38.871	45.922	49.223	46.784	55.312	59.674
809.5	47.122	33.91	43.561	44.939	41.674	54.316	39.027	46.088	49.309	46.537	55.174	59.662
810	47.036	33.999	43.5	44.99	41.744	54.368	39.167	46.16	49.439	46.405	55.03	59.446
810.5	47.089	34.054	43.502	45.094	41.831	54.541	39.225	46.169	49.438	46.549	54.938	59.394
811	47.184	33.884	43.504	45.017	41.851	54.582	39.169	46.195	49.287	46.79	54.97	59.268
811.5	47.058	33.835	43.494	44.792	41.794	54.486	39.19	46.248	49.266	46.894	55.101	59.154
812	46.922	33.848	43.443	44.68	41.718	54.378	39.305	46.184	49.367	46.869	55.056	59.34
812.5	46.884	33.898	43.469	44.709	41.683	54.321	39.415	46.111	49.42	46.863	54.926	59.458
813	47.057	33.846	43.466	44.844	41.726	54.299	39.442	46.095	49.409	46.97	54.989	59.46
813.5	47.218	33.858	43.528	44.973	41.839	54.299	39.481	46.168	49.447	47.168	55.162	59.396
814	47.117	33.931	43.585	45.082	41.959	54.309	39.542	46.244	49.438	47.258	55.177	59.48
814.5	47.039	34.033	43.58	45.146	42.05	54.357	39.593	46.325	49.318	47.161	55.064	59.164
815	47.009	34.081	43.498	45.044	42.033	54.522	39.686	46.391	49.258	47.046	55.028	58.857
815.5	46.993	34.067	43.494	44.867	41.964	54.611	39.743	46.542	49.364	47.1	55.151	58.864
816	46.878	34.018	43.615	44.795	41.989	54.574	39.768	46.726	49.453	47.272	55.283	59.225
816.5	46.857	33.963	43.661	44.86	41.904	54.476	39.802	46.729	49.451	47.26	55.175	59.603
817	46.911	33.909	43.592	44.962	41.878	54.42	39.882	46.62	49.506	47.288	55.036	59.479
817.5	46.815	33.919	43.378	45.002	41.823	54.533	39.973	46.556	49.672	47.395	55.016	59.496
818	46.71	33.904	43.172	45.02	41.722	54.685	40.009	46.642	49.744	47.516	55.22	59.403
818.5	46.709	33.887	43.212	45.131	41.683	54.673	40.086	46.771	49.646	47.568	55.277	59.106
819	46.614	33.901	43.343	45.282	41.789	54.562	40.16	46.688	49.438	47.552	55.25	58.885
819.5	46.536	33.9	43.472	45.23	41.78	54.504	40.187	46.578	49.317	47.601	55.154	58.838
820	46.534	34.043	43.738	45.164	41.774	54.498	40.146	46.658	49.261	47.511	55.215	59.083
820.5	46.563	33.969	43.694	45.024	41.719	54.678	40.152	46.843	49.293	47.522	55.13	59.037
821	46.592	33.929	43.429	44.839	41.721	54.682	40.097	46.739	49.31	47.391	55.137	59.249
821.5	46.787	33.952	43.248	44.825	41.784	54.628	40.078	46.598	49.126	47.335	55.057	59.663
822	46.795	34.131	43.27	45.015	42.039	54.579	40.207	46.611	49.151	47.45	55.042	59.704
822.5	46.679	34.001	43.183	44.898	42.154	54.658	40.411	46.784	49.358	47.571	55.097	59.029
823	46.62	34.021	43.31	44.835	42.05	54.869	40.564	47.017	49.378	47.695	55.203	58.579
823.5	46.634	33.92	43.415	44.738	41.897	54.95	40.651	47.19	49.281	47.771	55.167	58.947
824	46.462	33.824	43.301	44.73	41.716	54.813	40.589	47.245	49.283	47.779	55.052	59.37
824.5	46.383	33.834	43.116	44.688	41.651	54.742	40.461	47.291	49.378	47.841	55.101	59.106
825	46.517	34.011	43.116	44.927	41.643	54.669	40.404	47.364	49.306	47.868	55.136	58.493
825.5	46.658	34.126	43.389	44.953	41.697	54.462	40.392	47.27	49.326	47.923	55.237	58.239
826	46.525	34.125	43.683	44.924	41.774	54.126	40.408	46.989	49.358	48.017	55.157	58.632
826.5	46.357	34.134	43.621	44.784	41.875	54.049	40.482	46.8	49.246	48.211	55.128	59.148
827	46.379	34.168	43.604	44.802	41.872	54.261	40.58	46.884	49.232	48.192	55.059	59.735
827.5	46.335	34.162	43.718	44.85	41.715	54.405	40.651	47.022	49.294	48.098	55.097	59.749
828	46.412	34.234	43.852	44.93	41.576	54.4	40.738	47.104	49.377	48.016	55.154	59.4
828.5	46.565	34.163	43.852	44.817	41.666	54.311	40.65	47.019	49.362	48.098	55.033	59.555
829	46.713	34.147	43.815	44.769	41.792	54.309	40.559	47.024	49.354	48.207	54.934	59.802
829.5	46.559	34.151	43.813	44.967	41.902	54.344	40.688	47.131	49.302	48.152	54.635	59.759
830	46.385	34.249	43.706	45.032	41.7	54.387	40.871	47.331	49.325	47.979	54.569	59.715
830.5	46.348	34.295	43.599	45.037	41.653	54.47	40.953	47.453	49.341	48.056	54.755	59.616
831	46.367	34.2	43.601	45.06	41.607	54.536	40.861	47.478	49.337	48.264	55.106	59.245
831.5	46.417	33.943	43.735	44.922	41.545	54.559	40.877	47.488	49.26	48.373	55.126	58.653
832	46.454	33.81	43.699	44.58	41.471	54.462	41.01	47.436	49.373	48.373	54.959	58.557
832.5	46.639	33.931	43.591	44.474	41.507	54.296	41.071	47.436	49.352	48.428	55.001	58.551
833	46.762	33.979	43.515	44.515	41.513	54.201	41.046	47.398	49.249	48.315	55.077	58.694
833.5	46.692	34.062	43.658	44.605	41.513	54.211	41.124	47.443	49.197	48.236	55.089	58.875
834	46.482	34.049	43.713	44.58	41.393	54.257	41.122	47.509	49.411	48.293	55.028	59.459
834.5	46.456	34.157	43.799	44.684	41.446	54.412	41.096	47.588	49.491	48.433	55.083	59.749
835	46.552	34.25	43.808	44.983	41.549	54.539	41.146	47.658	49.448	48.562	54.897	59.854
835.5	46.574	34.245	43.802	45.157	41.564	54.551	41.26	47.821	49.414	48.728	54.665	59.719
836	46.613	34.144	43.793	44.991	41.566	54.444	41.272	47.88	49.38	48.741	54.643	59.58
836.5	46.638	33.925	43.598	44.634	41.588	54.485	41.316	47.888	49.356	48.67	54.751	59.762
837	46.529	33.819	43.42	44.466	41.462	54.648	41.407	47.874	49.362	48.628	54.878	59.962
837.5	46.359	33.899	43.428	44.461	41.493	54.692	41.558	47.816	49.393	48.652	54.87	59.93
838	46.349	34.029	43.605	44.674	41.573	54.625	41.539	47.707	49.426	48.662	54.852	59.284
838.5	46.351	34.049	43.641	44.766	41.551	54.633	41.555	47.803	49.45	48.706	54.829	58.865
839	46.392	34.06	43.569	44.848	41.592	54.63	41.569	47.952	49.366	48.769	54.896	59.104
839.5	46.216	34.009	43.493	44.901	41.698	54.696	41.635	48.007	49.318	48.741	54.913	59.667
840	46.007	34.045	43.512	45.122	41.848	54.703	41.63	47.877	49.285	48.751	54.878	59.656
840.5	46.021	33.986	43.618	45.011	41.998	54.753	41.802	47.89	49.24	48.862	55.026	59.661
841	46.102	33.879	43.705	44.887	42.157	54.523	41.779	47.894	49.215	48.863	55.237	59.286
841.5	46.024	33.837	43.689	44.832	42.084	54.436	41.598	47.978	49.222	48.783	55.151	59.21
842	45.857	33.9	43.499	44.843	41.984	54.351	41.553	48.021	49.206	48.852	54.919	58.926
842.5	45.846	33.89	43.458	44.709	41.888	54.36	41.684	48.068	49.212	48.823	54.8	58.988
843	45.949	33.968	43.549	44.707	41.892	54.326	41.852	48.044	49.178	48.746	54.811	59.106
843.5	46.11	33.987	43.647	44.818	41.807	54.457	41.978	48.092	49.192	48.719	54.799	59.194
844	46.191	34.039	43.679	44.837	41.716	54.522	41.913	48.182	49.328	48.88	54.746	58.676
844.5	46.082	34.242	43.72	44.924	41.634	54.608	41.803	48.305	49.359	48.978	54.714	58.555
845	45.863	34.349	43.672	44.944	41.583	54.719	41.899	48.321	49.342	48.987	54.717	58.997
845.5	45.817	34.278	43.662	44.864	41.59	54.759	42.068	48.305	49.274	48.918	54.775	59.534
846	45.916	34.187	43.677	44.793	41.735	54.679	42.074	48.274	49.164	49.101	54.796	59.603
846.5	46.089	33.997	43.597	44.865	41.761	54.602	42.031	48.266	49.1	49.166	54.728	59.64
847	46.095	33.911	43.536	44.788	41.625	54.625	42.078	48.25	49.233	49.276	54.667	59.78
847.5	46.098	33.934	43.655	44.646	41.546	54.748	42.196	48.133	49.459	49.248	54.535	59.555
848	46.121	34.064	43.886	44.613	41.864	50.856	39.188	44.463	49.585	49.319	54.384	59.104
848.5	17.822	13.342	17.131	17.41	16.396	12.215	9.3962	10.653	19.32	19.191	21.198	23.259
