# Supplementary material for: Tomato yellow leaf curl virus manipulates Bemisia tabaci, MEAM1 both directly and indirectly through changes in visual and volatile cues
Source: PeerJ. 2024 Jul 23;12:e17665. doi: 10.7717/peerj.17665 (PMC11276755; doi:10.7717/peerj.17665)
Supplement: Supplemental Information 4 [file peerj-12-17665-s004.xlsx]

## Sheet: Sheet1
wavelength	late.stage.tylcv.2.2.21.a.dy.3	late.stage.tylcv.2.3.21.b.dy1	dy1a.feb16.1monthinfected.	dy1a.feb17.infected.	dy1b.feb16.1monthinfected.	dy1b.feb17.infected.	b1.a.infected.1-month.3.23	b2.mar24.1month.infected
184	0.001	0.001	0.001	0.001	0.001	0.001	0.001	0.001
184.5	0.001	0.001	0.001	0.001	0.001	0.001	0.001	0.001
185	0.001	0.001	0.001	0.001	0.001	0.001	0.001	0.001
185.5	0.001	0.001	0.001	0.001	0.001	0.001	0.001	0.001
186	0.001	0.001	0.001	0.001	0.001	0.001	0.001	0.001
186.5	0.001	0.001	0.001	0.001	0.001	0.001	0.001	0.001
187	0.001	0.001	0.001	0.001	0.001	0.001	0.001	0.001
187.5	0.001	0.001	0.001	0.001	0.001	0.001	0.001	0.001
188	0.001	0.001	0.001	0.001	0.001	0.001	0.001	0.001
188.5	0.001	0.001	0.001	0.001	0.001	0.001	0.001	0.001
189	0.001	0.001	0.001	0.001	0.001	0.001	0.001	0.001
189.5	73.79	118.75	95.276	82.283	225.51	81.421	-195.48	-323.66
190	151.4	273.46	322.86	135.62	589.57	126.07	-101.63	-174.34
190.5	-1134.2	-2601.8	-4886	127.57	-9265.4	114.14	-20.062	-59.161
191	-118.11	-324.86	-91.407	142.07	-374.12	139.13	-14.745	-70.26
191.5	-86.165	-299.63	-29.333	243.73	-281.17	249.13	-34.94	-101.46
192	-183.97	-554.35	-15.542	264.77	-169.49	255.57	-24.568	-89.732
192.5	-449.54	-1237.8	-8.054	309.6	-132.88	287.03	-22.811	-79.329
193	-1193.4	-3123.2	-7.0198	320.23	-118.46	295.54	-26.44	-77.953
193.5	-1326.8	-3438.5	-15.586	300.74	-123.65	283.43	-31.533	-83.178
194	-462.07	-1088.9	-22.099	318.22	-119.21	313.63	-27.893	-81.542
194.5	-301.29	-603.81	-27.877	308.9	-105.29	307.88	-12.59	-74.55
195	-369.43	-661.31	-41.944	298.51	-101.33	291.58	1.7752	-57.346
195.5	-445.81	-740.48	-57.911	291.13	-120.59	280.75	6.5626	-44.642
196	1985.1	3302.1	-63.878	248.99	-146.07	246.06	3.6474	-42.395
196.5	1513.6	2569.5	-58.812	219.43	-165.89	230.11	-4.3056	-40.92
197	860.69	1656.3	-42.852	208.55	-159.08	236.52	-16.189	-46.669
197.5	584.02	1304.6	-17.717	209.53	-121.8	250.19	-19.597	-47.493
198	9643	25836	-6.9093	229.18	-94.485	276.97	-18.619	-43.456
198.5	4807.7	12799	-11.166	247.74	-87.13	290.83	-26.05	-47.844
199	-297.1	-973.4	-14.27	234.23	-104.06	267.65	-32.677	-55.111
199.5	-206.47	-707.55	-12.12	225.54	-124.11	254.97	-32.732	-56.442
200	-191.44	-729.01	-13.435	217.02	-123.55	247.05	-32.073	-56.393
200.5	-181.74	-807.73	-9.0471	214.89	-112.97	245.99	-22.964	-49.462
201	-215.6	-911.38	-3.2747	240.52	-91.462	265.79	-12.638	-38.909
201.5	-327.51	-1174.4	-4.1584	246.47	-75.561	249.68	-11.161	-31.824
202	-233.68	-783.22	-1.2745	257.49	-73.036	238.27	-15.503	-33.902
202.5	-177.84	-547.67	5.3325	291.55	-75.432	255.64	-16.694	-36.726
203	-145.6	-434	12.478	321.61	-85.355	281.11	-18.961	-43.302
203.5	-103.17	-355.22	16.579	424.46	-88.316	405.69	-26.324	-59.179
204	-94.954	-420.64	13.364	543.28	-78.032	586.11	-30.888	-67.31
204.5	-180.45	-817.72	-3.4408	408.82	-76.41	480.15	-35.894	-79.124
205	967.88	3299.6	-21.866	300.43	-72.654	358.66	-34.51	-79.879
205.5	664.07	1997.2	-25.193	253.84	-74.282	312.79	-18.274	-58.325
206	1178.5	3099.3	-21.611	259.14	-89.634	312.16	-9.3617	-46.65
206.5	-868.59	-2061.6	-13.854	278.13	-98.426	325.83	-6.9868	-43.414
207	-232.75	-682.9	-6.8855	293.02	-97.915	342.52	-1.6412	-40.145
207.5	-171.65	-526.49	-7.7893	306.39	-96.266	331.14	-3.6508	-45.376
208	-132.5	-407.91	-10.453	261.77	-81.881	286.63	-6.8645	-48.452
208.5	-85.503	-264.57	-5.8081	254.79	-60.364	290.29	-8.3575	-45
209	-80.526	-212.27	-1.6045	282.32	-52.236	320.72	-12.362	-48.132
209.5	-90.375	-229.91	-3.0743	320.72	-58.66	377.59	-13.923	-50.327
210	-122.49	-298.27	-5.5378	391	-71.768	447.24	-14.387	-52.945
210.5	-170.42	-414.8	-9.9485	384.04	-87.058	428.85	-14.776	-49.561
211	-142.56	-375.41	-15.506	339.2	-95.233	385.28	-19.288	-38.048
211.5	-74.858	-242.16	-17.406	285.75	-97.02	319.8	-17.75	-23.862
212	-44.483	-205.64	-15.67	257.59	-93.465	277.59	-17.644	-16.997
212.5	-32.195	-222.48	-11.598	295.41	-86.113	300.84	-15.674	-18.678
213	-18.347	-228.33	-4.2643	320.47	-83.016	307.9	-11.385	-28.48
213.5	-8.549	-247.48	3.3093	343.27	-76.152	325.4	-9.1549	-40.927
214	-1.1794	-243.98	10.047	420.79	-66.464	438.04	-1.1305	-42.035
214.5	-8.2351	-217.34	11.912	391.8	-65.068	431.32	-0.12884	-35.543
215	-34.449	-278.99	10.304	431.27	-60.81	467.05	-2.9768	-27.589
215.5	-95.501	-449.08	6.8584	479.86	-52.471	509.32	-4.9414	-23.838
216	-141.05	-561.33	-2.0449	360.53	-56.5	359.4	-5.5642	-22.669
216.5	-149.51	-574.99	-2.8338	353.39	-58.453	373.03	1.8417	-19.787
217	-129.67	-478.7	-5.7512	356.34	-65.012	412.14	12.049	-14.562
217.5	-97.116	-349.56	-15.944	333.08	-82.33	412.04	18.895	-7.8172
218	-91.166	-322.77	-18.451	393.61	-90.994	489.59	21.33	-7.5354
218.5	-55.844	-274.19	-19.985	428.75	-103.6	464.01	16.559	-12.562
219	-32.268	-254.97	-19.393	431.9	-113.37	422.74	9.0429	-16.815
219.5	-21.41	-226.48	-14.263	440.41	-103.83	423.11	3.9241	-20.953
220	-13.688	-175.06	-12.639	409.79	-87.828	408.09	-0.96177	-22.637
220.5	-16.468	-166.5	-11.865	357.55	-74.539	388.3	-1.9105	-24.525
221	-9.853	-140.87	-11.023	273.6	-69.437	325.22	-3.2619	-32.878
221.5	-0.36703	-119.03	-6.8314	207.23	-69.978	255.55	-9.0134	-42.006
222	2.4657	-129.1	-2.6659	189.73	-73.391	231.05	-10.673	-40.318
222.5	4.5466	-138.7	-8.0138	176.02	-84.479	216.98	-6.9591	-25.971
223	6.2752	-163.92	-17.596	183.36	-100.18	224	-4.931	-14.491
223.5	5.3882	-228.79	-22.002	223.15	-104.65	271.95	-0.81679	-8.2731
224	13.688	-273.48	-18.814	295.76	-105.74	345.47	3.4042	-8.3009
224.5	-6.2875	-369.59	-5.7492	515.86	-89.639	573.83	4.3395	-16.012
225	-47.364	-463.74	3.9111	-2627.7	-72.792	-2954.8	6.7979	-20.279
225.5	-43.335	-374.73	10.7	-2824.3	-59.666	-3181.8	8.1409	-18.276
226	-44.667	-308.49	12.208	-504.12	-46.143	-607.46	7.4673	-14.047
226.5	-35.09	-257.87	10.37	-477.04	-41.061	-573.63	9.1833	-8.5637
227	-16.167	-202.24	12.287	-408.19	-33.646	-474.99	11.717	-7.1129
227.5	-19.123	-174.27	11.913	-434.1	-27.801	-495.96	12.987	-7.3502
228	-21.079	-140.3	14.4	-322.06	-24.155	-346.86	12.808	-7.2242
228.5	-17.39	-111.96	18.49	-187.6	-18.166	-197.96	12.59	-5.206
229	-11.157	-83.839	19.066	-152.13	-17.111	-153.18	13.022	-1.2408
229.5	-5.5023	-63.879	21.178	-123.91	-14.954	-116.04	13.779	1.5558
230	2.6112	-49.978	23.006	-90.104	-9.0375	-83.247	13.768	3.4537
230.5	17.434	-32.812	24.943	-55.346	-2.0949	-55.268	14.648	5.1448
231	30.541	-18.477	27.874	-20.42	6.9917	-26.47	16.032	7.3148
231.5	38.195	-6.4437	28.627	2.717	12.828	-5.8682	18.464	10.326
232	42.311	2.7237	28.786	16.89	15.361	9.3816	21.884	14.1
232.5	41.884	8.8687	28.733	23.734	17.533	19.419	23.772	17.147
233	39.905	12.622	29.364	28.812	19.662	26.55	24.962	19.67
233.5	39.914	14.956	31.02	33.481	21.852	31.177	25.712	21.489
234	40.547	18.132	32.672	35.721	24.074	33.003	26.34	22.407
234.5	42.004	22.508	34.114	37.715	26.234	34.944	27.535	23.671
235	42.424	25.904	35.108	39.125	28.227	37.104	28.692	24.527
235.5	42.289	29.005	35.766	39.382	29.555	39.201	29.608	25.113
236	42.868	31.216	36.454	40.83	30.507	41.282	30.282	25.704
236.5	42.856	32.437	36.674	42.432	31.13	42.922	30.639	25.786
237	42.68	33.424	36.68	43.456	31.384	43.827	30.734	25.834
237.5	42.377	33.71	36.68	44.443	31.794	44.309	30.778	26.017
238	41.817	34.182	36.582	44.733	32.192	44.526	30.778	26.193
238.5	41.656	34.927	36.478	44.668	32.324	44.213	30.686	26.309
239	41.636	35.314	36.425	44.691	32.609	43.838	30.711	26.481
239.5	41.327	35.487	36.358	44.676	32.888	43.404	30.707	26.797
240	40.806	35.344	36.192	44.605	33.093	43.124	30.835	27.25
240.5	40.122	34.989	36.131	44.361	33.332	43.097	31.104	27.662
241	39.83	34.881	36.185	44.034	33.468	43.221	31.429	27.951
241.5	39.806	35.006	36.294	43.712	33.556	43.436	31.762	28.087
242	39.638	35.186	36.39	43.528	33.744	43.447	31.85	28.113
242.5	39.421	35.252	36.471	43.331	33.958	43.286	31.756	28.121
243	39.113	35.366	36.241	43.127	34.051	43.051	31.61	28.161
243.5	38.862	35.51	35.828	42.947	34.025	42.881	31.468	28.245
244	38.66	35.513	35.518	42.816	33.932	42.896	31.481	28.366
244.5	38.471	35.471	35.393	42.709	33.864	42.887	31.615	28.531
245	38.159	35.229	35.543	42.574	33.897	42.862	31.775	28.671
245.5	37.741	34.807	35.777	42.347	33.978	42.729	31.96	28.779
246	37.48	34.482	35.876	42.075	34.053	42.404	32.166	28.875
246.5	37.269	34.33	35.841	41.973	33.991	42.204	32.351	28.964
247	37.048	34.234	35.696	41.983	33.89	42.057	32.475	29.091
247.5	36.916	34.228	35.557	42.026	33.811	41.902	32.569	29.221
248	36.751	34.223	35.556	42.001	33.722	41.84	32.6	29.311
248.5	36.632	34.068	35.64	41.897	33.831	41.746	32.61	29.327
249	36.545	33.871	35.696	41.746	33.919	41.548	32.62	29.296
249.5	36.326	33.655	35.666	41.642	33.995	41.373	32.596	29.232
250	36.088	33.4	35.511	41.627	34.038	41.217	32.538	29.132
250.5	35.827	33.21	35.254	41.559	33.966	41.085	32.48	29.112
251	35.563	33.131	35.028	41.395	33.91	41.03	32.487	29.127
251.5	35.448	33.03	34.958	41.207	33.88	40.999	32.555	29.113
252	35.275	32.899	34.925	40.983	33.835	40.965	32.565	29.127
252.5	35.084	32.816	34.895	40.794	33.729	40.87	32.524	29.11
253	34.925	32.765	34.949	40.682	33.688	40.715	32.46	29.105
253.5	34.746	32.716	34.926	40.594	33.674	40.537	32.403	29.198
254	34.726	32.613	34.849	40.465	33.644	40.312	32.387	29.311
254.5	34.744	32.434	34.677	40.268	33.623	40.116	32.346	29.333
255	34.71	32.137	34.474	40.032	33.526	39.921	32.226	29.277
255.5	34.692	31.918	34.303	39.699	33.375	39.707	32.094	29.135
256	34.54	31.861	34.166	39.426	33.183	39.536	32.02	28.961
256.5	34.343	31.778	34.099	39.233	33.054	39.409	31.988	28.855
257	34.195	31.726	33.994	39.069	32.933	39.254	32.012	28.805
257.5	33.997	31.663	33.874	38.942	32.758	39.081	31.991	28.781
258	33.823	31.534	33.79	38.755	32.65	38.899	31.923	28.731
258.5	33.657	31.446	33.748	38.553	32.5	38.678	31.811	28.649
259	33.577	31.337	33.654	38.459	32.303	38.534	31.682	28.538
259.5	33.571	31.232	33.529	38.372	32.215	38.437	31.584	28.356
260	33.585	31.167	33.385	38.352	32.158	38.355	31.504	28.233
260.5	33.591	31.064	33.228	38.382	32.082	38.26	31.45	28.176
261	33.5	30.891	33.143	38.286	31.976	38.102	31.373	28.098
261.5	33.294	30.671	33.044	38.173	31.829	37.909	31.284	28.024
262	33.141	30.5	32.908	38.013	31.653	37.738	31.2	27.91
262.5	33.017	30.378	32.768	37.876	31.559	37.596	31.101	27.791
263	32.877	30.375	32.622	37.779	31.513	37.499	31.011	27.735
263.5	32.767	30.381	32.491	37.609	31.446	37.455	30.916	27.721
264	32.615	30.26	32.451	37.459	31.422	37.361	30.854	27.696
264.5	32.474	30.15	32.451	37.235	31.358	37.2	30.841	27.674
265	32.361	30.011	32.431	37.097	31.29	37.118	30.778	27.617
265.5	32.298	29.928	32.404	37.037	31.239	36.966	30.689	27.563
266	32.289	29.926	32.365	36.909	31.18	36.891	30.557	27.545
266.5	32.275	29.929	32.308	36.798	31.108	36.888	30.4	27.475
267	32.19	29.943	32.21	36.656	31.037	36.724	30.291	27.405
267.5	32.004	29.858	32.091	36.578	30.971	36.594	30.235	27.336
268	31.833	29.688	31.957	36.578	30.852	36.449	30.171	27.244
268.5	31.69	29.477	31.891	36.564	30.763	36.315	30.096	27.167
269	31.726	29.359	31.879	36.495	30.737	36.206	30.026	27.071
269.5	31.897	29.352	31.882	36.311	30.727	36.106	29.945	26.962
270	31.987	29.469	31.81	36.062	30.715	35.988	29.875	26.843
270.5	32	29.514	31.636	35.842	30.643	35.844	29.876	26.724
271	31.984	29.488	31.434	35.658	30.49	35.708	29.847	26.7
271.5	31.931	29.373	31.307	35.667	30.308	35.578	29.767	26.711
272	31.886	29.186	31.25	35.694	30.148	35.446	29.648	26.711
272.5	31.786	29.075	31.25	35.701	30.036	35.355	29.525	26.709
273	31.651	29.046	31.276	35.616	29.969	35.253	29.402	26.604
273.5	31.505	29.068	31.218	35.418	29.915	35.187	29.293	26.446
274	31.312	29.071	31.153	35.303	29.896	35.135	29.299	26.357
274.5	31.249	29.135	31.061	35.202	29.884	35.033	29.317	26.292
275	31.267	29.175	30.906	35.262	29.814	34.949	29.377	26.277
275.5	31.29	29.147	30.73	35.289	29.684	34.807	29.443	26.294
276	31.363	29.049	30.566	35.311	29.551	34.721	29.444	26.269
276.5	31.365	28.873	30.37	35.286	29.432	34.718	29.378	26.23
277	31.148	28.613	30.297	35.136	29.368	34.754	29.244	26.146
277.5	30.939	28.372	30.383	35.054	29.357	34.765	29.151	26.066
278	30.834	28.274	30.469	34.973	29.306	34.676	29.016	26.051
278.5	30.751	28.227	30.57	34.895	29.277	34.555	28.89	26.023
279	30.764	28.305	30.596	34.921	29.216	34.375	28.864	26.001
279.5	30.682	28.366	30.464	34.868	29.083	34.169	28.833	25.952
280	30.515	28.32	30.331	34.743	28.965	34.036	28.818	25.842
280.5	30.38	28.211	30.207	34.667	28.844	33.973	28.771	25.764
281	30.306	28.005	30.14	34.564	28.763	33.927	28.668	25.754
281.5	30.294	27.948	30.132	34.429	28.781	33.892	28.574	25.726
282	30.256	27.908	30.1	34.272	28.788	33.805	28.469	25.663
282.5	30.21	27.889	30.027	34.102	28.742	33.679	28.432	25.599
283	30.183	27.835	29.9	33.951	28.669	33.62	28.409	25.518
283.5	30.117	27.699	29.792	33.871	28.562	33.564	28.368	25.469
284	29.98	27.611	29.72	33.857	28.526	33.525	28.367	25.429
284.5	29.921	27.547	29.666	33.869	28.53	33.448	28.339	25.41
285	29.886	27.525	29.628	33.852	28.544	33.324	28.27	25.38
285.5	29.845	27.474	29.565	33.811	28.499	33.207	28.183	25.314
286	29.769	27.376	29.479	33.748	28.382	32.997	28.106	25.183
286.5	29.626	27.248	29.435	33.581	28.242	32.855	27.988	24.994
287	29.446	27.106	29.382	33.373	28.142	32.751	27.87	24.825
287.5	29.403	27.034	29.248	33.189	28.03	32.595	27.783	24.735
288	29.46	26.973	29.048	33.045	27.82	32.527	27.748	24.783
288.5	29.416	26.775	28.86	32.961	27.651	32.405	27.774	24.892
289	29.288	26.537	28.679	32.93	27.525	32.259	27.852	24.991
289.5	29.05	26.291	28.611	32.961	27.485	32.188	27.872	25.029
290	28.802	26.117	28.634	32.997	27.577	32.131	27.842	24.961
290.5	28.62	26.036	28.661	33	27.624	32.108	27.788	24.865
291	28.562	25.995	28.69	32.948	27.599	32.151	27.721	24.819
291.5	28.658	25.998	28.751	32.811	27.585	32.177	27.682	24.865
292	28.75	26.027	28.844	32.701	27.612	32.195	27.699	24.972
292.5	28.817	26.021	28.922	32.674	27.687	32.238	27.752	24.993
293	28.782	25.97	28.893	32.689	27.735	32.171	27.834	24.953
293.5	28.703	25.937	28.782	32.763	27.787	32.105	27.915	24.958
294	28.673	25.855	28.719	32.822	27.802	32.035	27.997	25.013
294.5	28.716	25.858	28.672	32.788	27.762	31.923	28.057	25.144
295	28.842	25.924	28.694	32.738	27.703	31.917	28.077	25.272
295.5	28.927	25.902	28.73	32.68	27.608	31.946	28.081	25.329
296	28.97	25.95	28.709	32.556	27.517	31.949	28.062	25.301
296.5	28.852	26.015	28.733	32.532	27.469	31.965	28.062	25.247
297	28.643	25.973	28.733	32.535	27.469	31.942	28.102	25.231
297.5	28.501	25.93	28.704	32.494	27.504	31.942	28.154	25.214
298	28.405	25.872	28.673	32.493	27.561	31.982	28.154	25.146
298.5	28.404	25.694	28.587	32.431	27.581	31.981	28.147	25.084
299	28.491	25.509	28.576	32.377	27.616	31.978	28.118	24.998
299.5	28.547	25.409	28.462	32.282	27.499	31.863	28.107	24.861
300	28.513	25.374	28.312	32.286	27.297	31.725	28.044	24.791
300.5	28.434	25.442	28.225	32.312	27.206	31.597	27.969	24.778
301	28.333	25.576	28.12	32.343	27.185	31.513	27.926	24.773
301.5	28.275	25.6	28.095	32.325	27.223	31.46	27.844	24.813
302	28.297	25.566	28.063	32.219	27.189	31.388	27.752	24.863
302.5	28.321	25.43	27.962	32.109	27.007	31.317	27.66	24.812
303	28.222	25.196	27.903	32.028	26.818	31.179	27.563	24.714
303.5	28.132	24.97	27.905	32.037	26.755	31.113	27.523	24.641
304	28.188	24.757	27.922	31.982	26.775	31.063	27.525	24.57
304.5	28.227	24.747	27.981	31.805	26.816	30.965	27.518	24.588
305	28.191	24.842	27.953	31.6	26.777	30.844	27.502	24.613
305.5	28.022	24.868	27.891	31.43	26.664	30.694	27.462	24.607
306	27.722	24.878	27.842	31.381	26.57	30.651	27.36	24.551
306.5	27.598	24.813	27.737	31.371	26.497	30.651	27.222	24.451
307	27.593	24.767	27.67	31.37	26.474	30.683	27.08	24.409
307.5	27.67	24.854	27.595	31.342	26.489	30.699	26.993	24.382
308	27.643	24.88	27.517	31.27	26.43	30.616	26.946	24.382
308.5	27.54	24.884	27.401	31.273	26.294	30.518	26.961	24.324
309	27.586	24.909	27.274	31.271	26.135	30.483	26.988	24.242
309.5	27.576	24.789	27.184	31.221	26.052	30.436	27.033	24.194
310	27.604	24.651	27.141	31.208	26.025	30.415	27.04	24.177
310.5	27.558	24.506	27.2	31.181	26.049	30.339	26.923	24.193
311	27.354	24.357	27.281	31.092	26.042	30.148	26.783	24.165
311.5	27.211	24.316	27.329	31.07	25.922	29.979	26.652	24.068
312	27.118	24.397	27.305	30.955	25.84	29.871	26.631	23.956
312.5	27.071	24.461	27.235	30.791	25.771	29.878	26.698	23.894
313	27.042	24.461	27.129	30.736	25.757	29.981	26.797	23.875
313.5	26.962	24.359	27.012	30.693	25.797	30.018	26.864	23.888
314	26.85	24.135	26.926	30.651	25.835	29.965	26.877	23.873
314.5	26.665	23.949	26.837	30.588	25.874	29.838	26.778	23.814
315	26.446	23.788	26.757	30.467	25.851	29.68	26.572	23.805
315.5	26.399	23.752	26.705	30.338	25.804	29.539	26.372	23.78
316	26.431	23.805	26.635	30.303	25.702	29.415	26.201	23.766
316.5	26.582	23.869	26.566	30.346	25.602	29.4	26.149	23.765
317	26.696	23.919	26.459	30.291	25.468	29.366	26.163	23.662
317.5	26.717	23.94	26.336	30.252	25.339	29.371	26.233	23.573
318	26.698	23.881	26.28	30.191	25.248	29.405	26.267	23.533
318.5	26.62	23.872	26.293	30.146	25.172	29.367	26.266	23.489
319	26.576	23.853	26.262	30.147	25.107	29.278	26.229	23.491
319.5	26.448	23.775	26.198	30.086	25.043	29.157	26.204	23.489
320	26.334	23.661	26.127	29.991	25.017	29.043	26.196	23.457
320.5	26.26	23.4	26.106	29.866	25.007	28.97	26.178	23.441
321	26.173	23.227	26.142	29.772	25.013	28.96	26.099	23.394
321.5	26.114	23.181	26.134	29.675	24.969	28.91	26.062	23.325
322	26.067	23.128	26.063	29.587	24.858	28.783	26.045	23.217
322.5	26.075	23.166	25.997	29.551	24.799	28.699	26.024	23.139
323	26.145	23.191	25.974	29.563	24.758	28.626	25.994	23.128
323.5	26.177	23.217	26.026	29.598	24.742	28.596	25.923	23.11
324	26.15	23.31	26.04	29.559	24.744	28.456	25.909	23.145
324.5	26.046	23.441	26.036	29.464	24.703	28.232	25.947	23.192
325	25.889	23.462	26.085	29.352	24.67	28.15	25.971	23.232
325.5	25.872	23.425	26.033	29.286	24.655	28.166	25.922	23.279
326	25.892	23.245	25.956	29.255	24.609	28.304	25.839	23.21
326.5	25.901	23.02	25.814	29.231	24.591	28.364	25.734	23.101
327	26.011	22.872	25.631	29.139	24.539	28.23	25.7	23.031
327.5	26.048	22.824	25.556	29.043	24.471	28.015	25.678	23.058
328	26.017	22.852	25.546	28.983	24.362	27.941	25.649	23.1
328.5	25.962	22.838	25.52	28.903	24.134	27.952	25.638	23.076
329	25.834	22.741	25.47	28.85	23.992	27.975	25.574	23.016
329.5	25.763	22.776	25.361	28.788	23.902	27.864	25.516	22.936
330	25.772	22.863	25.268	28.711	23.921	27.608	25.473	22.85
330.5	25.897	22.954	25.152	28.756	23.948	27.419	25.414	22.823
331	25.869	22.98	25.068	28.831	24.038	27.377	25.381	22.73
331.5	25.819	22.883	25.04	28.825	24.095	27.436	25.283	22.619
332	25.769	22.72	24.931	28.744	24.009	27.475	25.157	22.573
332.5	25.652	22.649	24.9	28.631	23.835	27.403	25.114	22.524
333	25.649	22.619	24.87	28.557	23.624	27.303	25.083	22.516
333.5	25.598	22.579	24.843	28.517	23.41	27.207	25.147	22.518
334	25.503	22.623	24.839	28.449	23.288	27.165	25.182	22.455
334.5	25.372	22.659	24.807	28.42	23.262	27.1	25.156	22.454
335	25.254	22.691	24.777	28.357	23.212	26.992	25.077	22.459
335.5	25.206	22.556	24.784	28.289	23.257	26.978	24.964	22.43
336	25.169	22.419	24.654	28.252	23.28	26.906	24.883	22.452
336.5	25.156	22.224	24.477	28.221	23.3	26.878	24.728	22.416
337	25.119	22.145	24.37	28.185	23.355	26.773	24.643	22.347
337.5	25.034	22.221	24.233	28.29	23.385	26.709	24.62	22.328
338	24.986	22.262	24.292	28.353	23.418	26.627	24.623	22.239
338.5	24.989	22.336	24.391	28.275	23.339	26.681	24.752	22.196
339	25.058	22.363	24.344	28.127	23.087	26.78	24.828	22.189
339.5	25.176	22.232	24.34	27.888	22.842	26.762	24.802	22.193
340	25.081	21.949	24.301	27.712	22.731	26.726	24.709	22.156
340.5	24.975	21.583	24.289	27.713	22.785	26.606	24.597	22.086
341	24.974	21.362	24.347	27.792	22.956	26.548	24.534	22.059
341.5	24.976	21.31	24.344	27.85	23.072	26.541	24.495	22.012
342	25.103	21.472	24.234	27.826	23.09	26.534	24.463	22.033
342.5	25.103	21.688	24.113	27.739	23.038	26.496	24.497	22.002
343	24.824	21.598	24.136	27.708	23.062	26.447	24.578	22.04
343.5	24.562	21.499	24.216	27.729	23.068	26.441	24.643	22.106
344	24.463	21.497	24.282	27.732	23.038	26.46	24.687	22.125
344.5	24.463	21.504	24.261	27.758	22.911	26.413	24.627	22.035
345	24.597	21.672	24.131	27.788	22.813	26.367	24.492	21.895
345.5	24.801	21.725	23.984	27.847	22.742	26.336	24.453	21.781
346	24.93	21.651	23.99	27.877	22.749	26.326	24.372	21.678
346.5	24.976	21.726	24.077	27.824	22.73	26.389	24.319	21.667
347	24.896	21.838	24.115	27.68	22.626	26.341	24.285	21.652
347.5	24.704	21.898	24.161	27.586	22.616	26.269	24.196	21.632
348	24.504	21.815	24.08	27.56	22.626	26.11	24.182	21.61
348.5	24.365	21.451	23.91	27.467	22.665	26.028	24.119	21.514
349	24.318	21.094	23.719	27.318	22.735	26.022	24.1	21.42
349.5	24.402	20.907	23.598	27.235	22.644	25.986	24.094	21.436
350	24.552	20.733	23.576	27.16	22.55	25.974	24.058	21.574
350.5	24.587	20.633	23.588	27.056	22.437	25.735	24.008	21.657
351	24.413	20.517	23.655	27.007	22.299	25.552	23.938	21.603
351.5	24.125	20.428	23.634	26.9	22.227	25.506	23.91	21.546
352	23.77	20.515	23.55	26.905	22.15	25.567	23.878	21.431
352.5	23.655	20.528	23.52	27.058	22.169	25.642	23.854	21.425
353	23.577	20.419	23.536	27.069	22.24	25.644	23.832	21.488
353.5	23.542	20.27	23.602	27.053	22.219	25.532	23.709	21.432
354	23.582	20.174	23.685	26.98	22.21	25.517	23.63	21.311
354.5	23.525	20.17	23.701	26.898	22.136	25.567	23.641	21.155
355	23.618	20.172	23.659	26.917	22.149	25.59	23.72	21.009
355.5	23.673	20.065	23.586	26.882	22.225	25.552	23.831	20.936
356	23.621	19.834	23.551	26.925	22.18	25.386	23.889	20.896
356.5	23.567	19.705	23.545	26.941	22.194	25.31	23.843	20.931
357	23.481	19.71	23.527	26.832	22.09	25.236	23.702	20.911
357.5	23.447	19.904	23.566	26.794	22.009	25.23	23.615	20.929
358	23.463	20.17	23.519	26.702	21.91	25.171	23.554	21.048
358.5	23.471	20.291	23.436	26.622	21.776	25.071	23.491	21.125
359	23.39	20.15	23.371	26.62	21.791	25.103	23.431	21.157
359.5	23.211	19.856	23.309	26.664	21.885	25.238	23.356	21.042
360	23.058	19.637	23.348	26.74	22.002	25.363	23.393	20.88
360.5	22.995	19.492	23.344	26.767	21.992	25.346	23.441	20.735
361	23.167	19.549	23.416	26.756	21.895	25.196	23.518	20.696
361.5	23.365	19.643	23.511	26.643	21.798	25.037	23.567	20.674
362	23.46	19.762	23.538	26.486	21.78	24.888	23.528	20.619
362.5	23.365	19.903	23.573	26.524	21.897	24.933	23.56	20.586
363	23.091	19.868	23.496	26.526	21.985	24.931	23.549	20.553
363.5	22.904	19.692	23.315	26.533	21.986	24.873	23.506	20.586
364	22.734	19.511	23.195	26.561	21.969	24.853	23.395	20.498
364.5	22.658	19.452	23.165	26.545	21.926	24.746	23.315	20.417
365	22.587	19.468	23.081	26.464	21.799	24.669	23.246	20.357
365.5	22.5	19.517	23.138	26.451	21.742	24.642	23.159	20.242
366	22.448	19.566	23.145	26.424	21.679	24.583	23.129	20.202
366.5	22.47	19.633	23.17	26.344	21.592	24.544	23.069	20.209
367	22.585	19.802	23.264	26.457	21.582	24.532	23.061	20.268
367.5	22.839	20.095	23.332	26.44	21.551	24.557	23.039	20.41
368	22.992	20.314	23.39	26.444	21.499	24.576	23.024	20.422
368.5	22.944	20.293	23.339	26.355	21.497	24.561	23.012	20.316
369	22.888	20.174	23.312	26.197	21.517	24.538	22.956	20.168
369.5	22.734	19.941	23.182	26.174	21.418	24.496	22.966	20.111
370	22.603	19.71	23.194	26.271	21.378	24.551	22.902	20.203
370.5	22.663	19.724	23.195	26.487	21.341	24.63	22.889	20.326
371	22.748	19.981	23.047	26.577	21.357	24.638	22.903	20.268
371.5	22.964	20.352	22.943	26.524	21.516	24.557	22.842	20.086
372	23.224	20.618	22.843	26.408	21.715	24.422	22.83	19.964
372.5	23.235	20.593	22.864	26.246	21.873	24.324	22.689	19.937
373	23.208	20.265	23.06	26.286	22.052	24.37	22.652	20.11
373.5	23.2	20.175	23.124	26.332	22.038	24.401	22.667	20.219
374	23.267	20.326	23.133	26.317	22.026	24.376	22.664	20.103
374.5	23.38	20.582	23.147	26.224	21.958	24.296	22.694	19.966
375	23.595	20.884	23.229	26.056	21.838	24.187	22.638	19.901
375.5	23.682	20.868	23.444	25.943	21.766	24.118	22.629	19.85
376	23.808	20.874	23.697	25.965	21.666	24.073	22.619	19.889
376.5	23.957	21.017	23.965	26.081	21.719	23.993	22.615	19.868
377	23.98	21.148	24.114	26.281	21.799	24.049	22.635	19.8
377.5	23.901	21.328	24.098	26.279	21.826	24.174	22.589	19.835
378	23.763	21.491	23.842	26.217	21.698	24.308	22.504	19.873
378.5	23.68	21.58	23.576	26.116	21.58	24.315	22.518	19.902
379	23.721	21.755	23.489	25.982	21.554	24.182	22.629	19.921
379.5	24.07	21.924	23.506	25.977	21.668	24.083	22.79	19.911
380	24.285	21.849	23.586	26.007	21.859	24.143	22.892	19.952
380.5	24.457	21.683	23.622	26.067	21.916	24.368	22.884	20.037
381	24.392	21.526	23.522	26.065	21.932	24.441	22.785	20.109
381.5	24.413	21.501	23.551	26.031	21.934	24.366	22.68	20.121
382	24.485	21.628	23.703	25.847	21.998	24.123	22.603	19.968
382.5	24.691	21.691	23.787	25.661	22.06	23.838	22.529	19.839
383	24.885	21.677	23.902	25.687	22.113	23.644	22.545	19.709
383.5	24.908	21.617	23.963	25.901	22.062	23.571	22.678	19.648
384	24.965	21.852	24.066	26.078	21.959	23.4	22.819	19.671
384.5	24.882	22.248	24.111	26.037	21.819	23.32	22.958	19.787
385	24.926	22.384	23.966	25.67	21.611	23.17	22.946	20.047
385.5	25.091	22.548	23.727	25.438	21.517	23.113	22.885	20.206
386	25.306	22.293	23.439	25.317	21.464	23.181	22.839	20.325
386.5	25.684	21.937	23.427	25.52	21.564	23.437	22.689	20.316
387	25.802	21.811	23.631	25.806	21.636	23.599	22.684	20.178
387.5	25.733	21.719	23.876	25.834	21.597	23.633	22.617	20.074
388	25.553	21.895	24.203	25.974	21.701	23.595	22.458	19.887
388.5	25.43	22.184	24.36	25.942	21.677	23.397	22.357	19.821
389	25.402	22.5	24.315	25.971	21.772	23.307	22.289	19.98
389.5	25.575	22.737	24.018	26.188	21.911	23.225	22.376	20.241
390	25.746	22.844	23.722	26.244	21.885	23.075	22.592	20.38
390.5	25.779	22.866	23.536	26.096	21.881	23.038	22.789	20.347
391	25.929	22.835	23.317	25.685	21.669	22.981	22.808	20.15
391.5	25.841	22.745	23.322	25.182	21.52	22.942	22.731	19.979
392	25.776	22.69	23.377	24.913	21.474	22.933	22.562	20.024
392.5	25.807	22.643	23.505	24.823	21.504	22.872	22.355	20.055
393	25.917	22.488	23.714	24.783	21.516	22.794	22.333	20.066
393.5	26.147	22.487	23.7	24.645	21.341	22.76	22.436	20.036
394	26.373	22.408	23.442	24.407	21.233	22.732	22.708	19.961
394.5	26.541	22.356	23.099	24.295	21.196	22.594	22.875	19.851
395	26.544	22.412	22.786	24.467	21.257	22.586	22.834	19.667
395.5	26.564	22.568	22.646	24.698	21.251	22.481	22.75	19.617
396	26.395	22.638	22.908	25.08	21.202	22.533	22.746	19.6
396.5	26.501	22.802	23.221	25.214	21.102	22.602	22.909	19.647
397	26.661	22.956	23.474	25.051	20.983	22.378	23.014	19.658
397.5	26.774	23.043	23.285	24.974	20.89	22.096	22.923	19.548
398	26.93	23.137	23.018	24.892	20.925	21.761	22.769	19.574
398.5	26.619	22.945	22.756	24.842	21.121	21.627	22.6	19.784
399	26.614	22.717	22.73	24.88	21.335	21.869	22.537	20.05
399.5	26.684	22.527	23.034	24.696	21.429	22.151	22.498	20.271
400	26.706	22.528	23.21	24.328	21.022	22.242	22.575	20.397
400.5	26.749	22.69	23.204	24.243	20.709	22.146	22.854	20.394
401	26.678	22.948	23.05	24.344	20.546	21.842	23.118	20.204
401.5	26.485	23.233	22.722	24.545	20.721	21.605	23.336	20.076
402	26.435	23.316	22.682	24.875	20.91	21.54	23.363	19.901
402.5	26.548	23.116	22.665	24.861	21.022	21.63	23.223	19.941
403	26.75	22.894	22.552	24.734	21.029	21.597	23.045	19.985
403.5	27.062	22.485	22.275	24.486	20.921	21.391	22.874	19.948
404	27.195	22.456	22.121	24.33	20.903	21.109	22.65	19.807
404.5	27.207	22.705	22.043	24.441	20.873	20.833	22.358	19.535
405	27.211	22.893	22.075	24.448	20.736	20.867	22.158	19.197
405.5	27.223	23.116	22.072	24.518	20.708	21.001	22.158	19.065
406	26.993	23.044	21.828	24.379	20.642	20.917	22.301	19.155
406.5	26.958	22.89	21.993	24.225	20.586	20.935	22.534	19.534
407	26.901	22.852	22.156	24.331	20.681	21.034	22.623	19.832
407.5	26.931	22.995	22.427	24.426	20.778	21.32	22.796	19.972
408	27.099	23.177	22.735	24.605	20.869	21.691	22.942	19.923
408.5	27.063	23.301	22.773	24.762	20.887	21.841	22.962	19.874
409	27.239	23.416	22.771	24.764	20.784	21.758	22.882	19.939
409.5	27.332	23.384	22.524	24.675	20.601	21.42	22.747	19.928
410	27.35	23.325	22.135	24.606	20.428	21.261	22.574	19.763
410.5	27.195	23.231	21.806	24.571	20.233	21.011	22.679	19.699
411	26.846	23.208	21.609	24.463	20.113	20.798	22.733	19.714
411.5	26.64	23.198	21.558	24.284	20.059	20.79	22.725	19.914
412	26.622	23.178	21.603	24.114	20.023	20.692	22.615	20.116
412.5	26.711	23.207	21.762	24.093	20.098	20.878	22.501	20.125
413	27.137	23.329	21.842	24.37	20.174	20.938	22.363	20.01
413.5	27.477	23.585	21.901	24.483	20.107	20.716	22.42	19.957
414	27.644	23.715	21.909	24.394	20.01	20.646	22.496	19.816
414.5	27.666	23.624	21.736	24.177	19.877	20.652	22.585	19.751
415	27.568	23.498	21.648	24.056	19.771	20.856	22.741	19.659
415.5	27.413	23.391	21.541	24.107	19.916	21.004	22.854	19.55
416	27.391	23.347	21.538	24.435	20.043	21.018	22.81	19.457
416.5	27.379	23.238	21.681	24.8	20.108	20.985	22.725	19.501
417	27.322	22.97	21.974	24.919	20.147	20.99	22.621	19.582
417.5	27.449	22.961	22.057	24.94	20.112	21.092	22.722	19.7
418	27.446	23.122	21.882	24.751	20.102	20.938	22.776	19.799
418.5	27.527	23.34	21.514	24.559	20.043	20.736	22.757	19.815
419	27.566	23.55	21.272	24.428	20.114	20.641	22.696	19.904
419.5	27.562	23.599	21.369	24.492	20.014	20.636	22.483	19.889
420	27.719	23.596	21.535	24.623	19.923	20.892	22.427	19.872
420.5	27.643	23.586	21.651	24.934	19.868	21.146	22.459	19.864
421	27.567	23.6	21.606	25.12	19.872	21.153	22.508	19.866
421.5	27.342	23.702	21.428	25.088	19.946	21.056	22.554	19.979
422	27.255	23.909	21.307	24.891	20.012	20.784	22.531	20.012
422.5	27.376	23.957	21.177	24.651	20.047	20.755	22.322	19.97
423	27.603	23.872	21.21	24.455	19.974	20.761	22.249	19.912
423.5	27.63	23.51	21.318	24.539	19.936	20.958	22.33	19.908
424	27.562	23.232	21.395	24.666	19.727	21.027	22.459	19.928
424.5	27.46	23.165	21.336	24.704	19.549	20.792	22.536	20.006
425	27.417	23.273	21.212	24.756	19.392	20.726	22.592	20.092
425.5	27.556	23.584	21.149	24.702	19.395	20.573	22.566	20.181
426	27.593	23.848	21.177	24.667	19.552	20.581	22.554	20.168
426.5	27.718	24	21.236	24.793	19.717	20.666	22.645	20.102
427	27.874	24.193	21.23	24.886	19.904	20.592	22.54	19.924
427.5	27.95	24.12	21.139	25.024	20.034	20.743	22.488	19.837
428	27.929	24.021	21.106	25.174	20.009	20.902	22.375	19.875
428.5	27.826	23.897	21.072	25.139	20.016	21.048	22.241	19.993
429	27.594	23.587	21.037	25.063	19.977	20.976	22.219	19.956
429.5	27.605	23.647	20.995	25.006	20.018	20.717	22.266	19.868
430	27.642	23.771	21.044	25.001	20.128	20.598	22.287	19.761
430.5	27.674	23.938	21.114	25.094	20.094	20.681	22.381	19.769
431	27.674	24.153	21.343	25.139	20.141	20.858	22.401	19.854
431.5	27.622	24.308	21.442	25.136	20.153	20.987	22.431	19.771
432	27.663	24.405	21.368	25	20.076	20.871	22.516	19.822
432.5	27.61	24.451	21.313	24.839	20.157	20.742	22.558	19.791
433	27.55	24.298	21.128	24.883	20.033	20.529	22.539	19.638
433.5	27.482	23.955	21.114	25.035	20.024	20.508	22.473	19.498
434	27.419	23.747	21.164	25.225	20.043	20.541	22.4	19.389
434.5	27.568	23.859	21.223	25.414	20.059	20.649	22.345	19.637
435	27.621	24.086	21.312	25.482	20.206	20.808	22.382	20.036
435.5	27.588	24.325	21.24	25.542	20.262	20.86	22.305	20.211
436	27.613	24.428	21.242	25.54	20.41	20.919	22.249	20.121
436.5	27.646	24.306	21.203	25.453	20.431	20.997	22.257	19.847
437	27.715	24.233	21.159	25.417	20.337	21.149	22.305	19.692
437.5	27.804	24.088	21.094	25.577	20.269	21.3	22.389	19.662
438	27.813	24.076	20.936	25.737	20.11	21.333	22.378	19.799
438.5	27.85	24.196	20.913	25.868	20.122	21.254	22.199	20.016
439	27.832	24.473	20.942	25.903	20.189	21.087	22.055	20.054
439.5	27.854	24.694	21.025	25.969	20.214	21.009	22.04	20.005
440	27.872	24.823	21.03	26.091	20.126	20.873	22.147	19.898
440.5	27.893	24.858	20.98	26.247	20.094	20.789	22.307	19.912
441	27.923	24.829	20.916	26.23	20.073	20.713	22.426	20.048
441.5	27.781	24.69	21.02	26.279	20.176	20.69	22.319	20.014
442	27.738	24.654	21.168	26.42	20.302	20.77	22.263	19.893
442.5	27.792	24.679	21.296	26.647	20.261	20.783	22.126	19.667
443	27.948	24.916	21.236	26.857	20.222	20.824	22.207	19.668
443.5	28.083	25.35	21.042	26.971	20.187	20.859	22.31	19.717
444	28.05	25.675	20.955	27.067	20.166	20.813	22.422	19.821
444.5	27.988	25.929	21.016	27.246	20.238	20.865	22.528	19.839
445	27.966	26.122	21.203	27.481	20.413	20.918	22.529	19.717
445.5	28.012	26.217	21.225	27.568	20.531	21.015	22.551	19.584
446	27.944	26.367	21.126	27.673	20.699	21.092	22.555	19.481
446.5	27.919	26.55	20.957	27.794	20.71	20.968	22.563	19.55
447	27.979	26.79	20.811	27.99	20.624	20.866	22.557	19.556
447.5	28.011	27.038	20.814	28.284	20.528	20.803	22.453	19.681
448	28.036	27.149	20.817	28.358	20.541	20.776	22.373	19.778
448.5	27.944	27.313	20.886	28.336	20.624	20.737	22.458	19.884
449	27.901	27.454	21.073	28.263	20.818	20.648	22.565	20.048
449.5	27.957	27.77	21.187	28.329	20.898	20.684	22.738	20.01
450	27.984	28.18	21.221	28.476	20.936	20.681	22.777	19.904
450.5	27.98	28.408	21.168	28.723	21.069	20.762	22.848	19.832
451	27.918	28.578	21.053	28.97	21.205	20.815	22.901	19.884
451.5	27.953	28.51	20.924	29.076	21.345	20.912	22.926	20.007
452	28.065	28.535	20.822	29.102	21.324	21.05	22.935	20.122
452.5	28.11	28.672	20.782	29.056	21.135	21.109	22.955	20.137
453	28.081	28.758	20.752	29.046	20.99	21.039	22.973	20.069
453.5	28.04	28.897	20.8	29.198	20.892	20.858	23.008	20.023
454	27.973	28.973	20.717	29.311	20.895	20.723	22.968	20.025
454.5	28.009	29.101	20.687	29.286	20.948	20.615	23.063	20.102
455	28.05	29.314	20.707	29.191	20.954	20.611	23.124	20.157
455.5	28.123	29.488	20.672	29.158	20.982	20.683	23.107	20.092
456	28.315	29.633	20.554	29.211	21.006	20.634	23.003	19.94
456.5	28.524	29.72	20.528	29.26	21.039	20.567	22.855	19.744
457	28.681	29.801	20.722	29.25	21.034	20.514	22.78	19.73
457.5	28.661	29.788	21.035	29.198	20.982	20.588	22.85	19.93
458	28.566	29.729	21.264	29.258	21.016	20.741	23.059	20.147
458.5	28.56	29.623	21.288	29.308	21.047	20.855	23.16	20.255
459	28.665	29.507	21.206	29.379	21.146	20.943	23.216	20.256
459.5	28.75	29.394	21.156	29.385	21.183	20.889	22.993	20.144
460	28.76	29.474	21.061	29.307	21.113	20.841	22.732	20.082
460.5	28.637	29.385	20.974	29.269	21.056	20.82	22.645	20.13
461	28.516	29.399	20.981	29.247	20.96	20.715	22.721	20.178
461.5	28.49	29.24	21.008	29.129	21.006	20.685	22.823	20.254
462	28.555	29.143	21.247	28.97	21.186	20.72	22.841	20.207
462.5	28.712	29.066	21.482	28.813	21.336	20.929	22.766	20.162
463	28.844	29.099	21.729	28.832	21.432	21.158	22.685	20.205
463.5	28.965	29.283	21.812	28.871	21.247	21.29	22.679	20.314
464	29.07	29.476	21.718	28.715	21.049	21.214	22.696	20.379
464.5	29.156	29.556	21.539	28.55	20.966	21.125	22.616	20.35
465	29.293	29.548	21.403	28.43	20.953	21.069	22.547	20.232
465.5	29.446	29.414	21.336	28.541	21.038	21.087	22.473	20.166
466	29.551	29.32	21.416	28.703	21.031	21.117	22.468	20.14
466.5	29.619	29.231	21.482	28.723	21.021	21.152	22.605	20.195
467	29.635	29.28	21.545	28.717	21.015	21.216	22.685	20.291
467.5	29.655	29.371	21.565	28.797	21.045	21.202	22.767	20.347
468	29.666	29.451	21.586	28.849	21.091	21.226	22.716	20.335
468.5	29.718	29.477	21.591	28.846	21.034	21.21	22.67	20.234
469	29.762	29.411	21.62	28.808	20.976	21.164	22.672	20.294
469.5	29.826	29.401	21.57	28.67	20.85	21.119	22.66	20.316
470	29.893	29.384	21.555	28.608	20.846	21.154	22.681	20.331
470.5	29.948	29.306	21.486	28.605	20.895	21.211	22.695	20.245
471	30.025	29.188	21.438	28.623	20.959	21.27	22.722	20.092
471.5	30.13	29.153	21.46	28.795	21.044	21.236	22.746	20.088
472	30.216	29.187	21.455	28.959	20.976	21.159	22.702	20.126
472.5	30.186	29.324	21.426	28.958	20.889	21.133	22.721	20.262
473	30.009	29.394	21.346	28.901	20.757	21.107	22.709	20.429
473.5	29.849	29.431	21.278	28.713	20.663	21.082	22.699	20.482
474	29.794	29.385	21.337	28.569	20.675	21.083	22.696	20.503
474.5	29.879	29.332	21.35	28.394	20.704	21.109	22.667	20.404
475	30.091	29.287	21.413	28.279	20.716	21.175	22.652	20.27
475.5	30.226	29.243	21.456	28.281	20.658	21.172	22.643	20.201
476	30.307	29.216	21.481	28.316	20.509	21.106	22.576	20.145
476.5	30.291	29.156	21.487	28.421	20.401	21.015	22.528	20.226
477	30.161	29.109	21.367	28.45	20.367	20.978	22.544	20.36
477.5	29.994	29.106	21.284	28.467	20.454	20.924	22.591	20.463
478	29.889	29.156	21.262	28.468	20.452	20.916	22.656	20.52
478.5	29.871	29.172	21.306	28.49	20.483	21.016	22.624	20.478
479	29.915	29.191	21.339	28.524	20.442	21.085	22.582	20.449
479.5	29.985	29.151	21.279	28.639	20.4	21.233	22.548	20.398
480	30.012	29.114	21.242	28.685	20.381	21.259	22.568	20.382
480.5	29.993	29.211	21.256	28.725	20.364	21.289	22.601	20.368
481	29.948	29.363	21.318	28.71	20.39	21.346	22.591	20.306
481.5	29.892	29.501	21.361	28.649	20.395	21.384	22.511	20.27
482	29.864	29.463	21.337	28.645	20.356	21.435	22.469	20.287
482.5	29.987	29.342	21.326	28.649	20.274	21.449	22.388	20.368
483	30.061	29.258	21.285	28.639	20.202	21.41	22.327	20.482
483.5	30.123	29.302	21.266	28.605	20.206	21.405	22.346	20.537
484	30.142	29.387	21.201	28.521	20.245	21.416	22.373	20.533
484.5	30.222	29.412	21.104	28.429	20.329	21.452	22.453	20.472
485	30.383	29.419	21.04	28.443	20.401	21.524	22.524	20.441
485.5	30.472	29.42	21.08	28.434	20.381	21.549	22.553	20.4
486	30.492	29.45	21.161	28.49	20.38	21.566	22.57	20.427
486.5	30.54	29.448	21.211	28.566	20.343	21.497	22.534	20.504
487	30.619	29.482	21.228	28.661	20.36	21.401	22.506	20.489
487.5	30.696	29.511	21.195	28.777	20.42	21.348	22.465	20.496
488	30.641	29.623	21.257	28.821	20.48	21.399	22.477	20.442
488.5	30.578	29.715	21.431	28.885	20.581	21.545	22.509	20.411
489	30.58	29.79	21.533	28.935	20.66	21.671	22.61	20.487
489.5	30.595	29.845	21.629	28.996	20.723	21.78	22.738	20.552
490	30.649	29.855	21.691	28.997	20.795	21.844	22.844	20.583
490.5	30.706	29.91	21.708	29.025	20.864	21.914	22.899	20.599
491	30.785	29.997	21.746	28.979	20.877	21.931	22.903	20.639
491.5	30.936	30.082	21.739	28.939	20.823	21.8	22.872	20.707
492	31.049	30.213	21.749	29.003	20.685	21.677	22.864	20.85
492.5	31.216	30.312	21.84	29.131	20.586	21.667	22.94	20.952
493	31.384	30.407	21.911	29.388	20.607	21.79	23.056	21.003
493.5	31.477	30.424	21.969	29.544	20.666	21.983	23.171	21.07
494	31.513	30.479	21.909	29.521	20.707	22.028	23.228	21.094
494.5	31.566	30.555	21.91	29.432	20.711	21.967	23.247	21.181
495	31.665	30.689	21.92	29.4	20.713	21.938	23.303	21.278
495.5	31.817	30.84	21.993	29.476	20.84	21.943	23.345	21.342
496	31.943	30.982	22.053	29.628	21.005	21.98	23.413	21.381
496.5	32.104	31.088	22.085	29.753	21.173	21.986	23.503	21.43
497	32.329	31.263	22.164	29.844	21.292	22.009	23.646	21.536
497.5	32.56	31.369	22.238	29.897	21.352	22.063	23.768	21.689
498	32.724	31.564	22.427	29.93	21.412	22.236	23.884	21.789
498.5	32.79	31.721	22.615	29.964	21.504	22.29	23.995	21.912
499	32.884	31.897	22.778	30.136	21.532	22.394	24.093	21.925
499.5	33.051	32.075	22.924	30.295	21.545	22.468	24.173	21.945
500	33.293	32.291	22.966	30.412	21.53	22.557	24.212	21.977
500.5	33.579	32.466	23.016	30.378	21.571	22.618	24.236	22.079
501	33.83	32.593	23.117	30.333	21.768	22.59	24.338	22.189
501.5	34.044	32.661	23.236	30.399	22.024	22.547	24.508	22.307
502	34.265	32.805	23.349	30.534	22.196	22.565	24.728	22.365
502.5	34.431	33.026	23.48	30.695	22.275	22.62	24.937	22.449
503	34.567	33.239	23.571	30.859	22.295	22.728	25.102	22.59
503.5	34.702	33.369	23.68	31.045	22.394	22.878	25.245	22.753
504	34.887	33.373	23.869	31.235	22.568	23.05	25.377	22.907
504.5	35.14	33.379	24.039	31.387	22.749	23.207	25.59	23.083
505	35.32	33.505	24.239	31.523	22.953	23.358	25.801	23.258
505.5	35.471	33.786	24.402	31.578	23.122	23.435	25.935	23.386
506	35.58	34.116	24.524	31.628	23.318	23.405	26.036	23.497
506.5	35.841	34.404	24.66	31.606	23.391	23.327	26.066	23.588
507	36.105	34.579	24.818	31.66	23.436	23.303	26.112	23.726
507.5	36.402	34.709	25.011	31.741	23.48	23.421	26.215	23.952
508	36.645	34.783	25.185	31.915	23.573	23.614	26.355	24.188
508.5	36.889	34.953	25.374	32.125	23.736	23.803	26.571	24.447
509	37.134	35.165	25.518	32.245	23.86	23.86	26.863	24.676
509.5	37.432	35.516	25.68	32.315	24.006	23.863	27.14	24.787
510	37.658	35.744	25.87	32.401	24.146	23.963	27.427	24.885
510.5	37.904	35.893	26.098	32.629	24.386	24.12	27.664	24.952
511	38.108	36.025	26.336	32.949	24.702	24.335	27.858	25.086
511.5	38.338	36.228	26.555	33.238	25	24.448	28.012	25.23
512	38.566	36.507	26.73	33.478	25.272	24.529	28.166	25.417
512.5	38.85	36.742	26.833	33.6	25.397	24.698	28.372	25.648
513	39.179	36.972	26.95	33.69	25.509	24.844	28.636	25.931
513.5	39.518	37.104	27.19	33.743	25.737	25.073	28.893	26.202
514	39.774	37.19	27.474	33.867	26.009	25.199	29.124	26.368
514.5	39.964	37.217	27.844	34.064	26.285	25.358	29.328	26.505
515	40.15	37.276	28.207	34.284	26.467	25.484	29.532	26.602
515.5	40.397	37.461	28.562	34.471	26.63	25.564	29.749	26.751
516	40.749	37.681	28.85	34.586	26.779	25.702	29.875	26.91
516.5	41.069	37.883	29.004	34.677	26.909	25.769	30.005	27.038
517	41.395	38.099	29.14	34.777	27.039	25.892	30.151	27.246
517.5	41.598	38.268	29.346	34.927	27.257	26.06	30.34	27.434
518	41.75	38.434	29.686	35.17	27.537	26.25	30.575	27.661
518.5	41.826	38.514	30.039	35.428	27.781	26.42	30.743	27.789
519	41.93	38.539	30.37	35.637	28.01	26.529	30.922	27.914
519.5	42.168	38.611	30.629	35.814	28.213	26.591	31.074	28.03
520	42.449	38.746	30.864	35.925	28.421	26.687	31.249	28.165
520.5	42.754	38.971	31.047	36.101	28.579	26.773	31.442	28.349
521	42.979	39.155	31.204	36.319	28.719	26.973	31.675	28.558
521.5	43.197	39.291	31.4	36.553	28.898	27.214	31.923	28.764
522	43.465	39.397	31.589	36.756	29.018	27.447	32.112	28.914
522.5	43.625	39.535	31.808	36.86	29.123	27.593	32.298	28.982
523	43.75	39.694	32.061	36.966	29.299	27.676	32.364	29.022
523.5	43.896	39.814	32.324	36.971	29.517	27.714	32.428	29.025
524	44.106	39.909	32.568	36.99	29.818	27.816	32.485	29.045
524.5	44.392	40.088	32.777	37.134	30.045	27.956	32.563	29.173
525	44.631	40.371	32.971	37.354	30.188	28.118	32.642	29.353
525.5	44.819	40.524	33.152	37.628	30.266	28.303	32.704	29.578
526	44.997	40.44	33.368	37.742	30.384	28.376	32.856	29.68
526.5	45.115	40.318	33.573	37.8	30.584	28.48	33.06	29.708
527	45.253	40.351	33.773	37.869	30.807	28.565	33.333	29.691
527.5	45.378	40.51	34.051	38.01	31.089	28.678	33.47	29.686
528	45.452	40.671	34.332	38.189	31.183	28.811	33.503	29.682
528.5	45.581	40.812	34.541	38.381	31.227	28.882	33.5	29.691
529	45.726	40.915	34.714	38.491	31.306	28.94	33.489	29.764
529.5	45.82	40.996	34.818	38.622	31.432	28.952	33.575	29.852
530	45.815	41.022	34.957	38.78	31.657	29.03	33.702	29.927
530.5	45.806	41.069	35.115	38.967	31.774	29.115	33.815	29.93
531	45.932	41.229	35.293	39.135	31.86	29.233	33.884	29.896
531.5	46.226	41.339	35.441	39.209	31.908	29.323	33.953	29.963
532	46.356	41.32	35.564	39.212	31.969	29.398	34.031	30.108
532.5	46.401	41.29	35.619	39.239	32.053	29.55	34.152	30.232
533	46.365	41.311	35.713	39.313	32.184	29.669	34.186	30.318
533.5	46.392	41.393	35.853	39.45	32.297	29.754	34.187	30.317
534	46.537	41.595	36.018	39.55	32.318	29.723	34.205	30.415
534.5	46.718	41.779	36.208	39.62	32.348	29.691	34.275	30.515
535	47.019	41.983	36.387	39.688	32.451	29.706	34.395	30.587
535.5	47.243	42.02	36.554	39.927	32.66	29.827	34.47	30.6
536	47.295	41.884	36.67	40.134	32.782	29.983	34.532	30.581
536.5	47.235	41.755	36.726	40.379	32.849	30.155	34.608	30.553
537	47.324	41.816	36.89	40.533	32.985	30.344	34.667	30.612
537.5	47.51	41.963	37.06	40.603	33.124	30.488	34.734	30.68
538	47.731	42.17	37.258	40.627	33.307	30.528	34.776	30.709
538.5	47.817	42.275	37.371	40.574	33.438	30.502	34.811	30.699
539	47.877	42.437	37.4	40.607	33.571	30.431	34.852	30.661
539.5	47.928	42.462	37.439	40.704	33.67	30.419	34.848	30.689
540	48.059	42.537	37.561	40.752	33.621	30.49	34.875	30.8
540.5	48.19	42.587	37.741	40.857	33.552	30.545	34.87	30.839
541	48.312	42.622	37.829	41.02	33.491	30.588	34.844	30.842
541.5	48.355	42.787	37.903	41.266	33.529	30.658	34.856	30.866
542	48.437	42.849	37.918	41.461	33.599	30.732	34.94	30.917
542.5	48.595	42.939	38.025	41.528	33.744	30.812	35.037	30.989
543	48.771	42.956	38.132	41.561	33.903	30.811	35.152	31.055
543.5	48.793	42.936	38.259	41.587	34.159	30.864	35.131	31.035
544	48.706	42.913	38.368	41.609	34.251	30.905	35.111	30.98
544.5	48.703	42.969	38.427	41.521	34.267	30.95	35.048	30.917
545	48.857	43.048	38.425	41.419	34.213	31.003	35.128	30.996
545.5	49.057	43.237	38.43	41.482	34.23	31.072	35.237	31.164
546	49.169	43.416	38.527	41.707	34.28	31.192	35.324	31.361
546.5	49.219	43.5	38.678	41.908	34.331	31.209	35.394	31.498
547	49.209	43.586	38.778	41.969	34.414	31.237	35.436	31.556
547.5	49.239	43.583	38.875	41.927	34.494	31.338	35.494	31.547
548	49.327	43.647	39.005	41.969	34.587	31.5	35.575	31.45
548.5	49.565	43.694	39.22	42.125	34.656	31.619	35.595	31.395
549	49.817	43.759	39.361	42.317	34.659	31.627	35.692	31.443
549.5	49.89	43.761	39.43	42.409	34.697	31.603	35.704	31.533
550	49.789	43.715	39.437	42.406	34.722	31.575	35.642	31.61
550.5	49.751	43.646	39.503	42.363	34.766	31.581	35.614	31.602
551	49.767	43.748	39.564	42.436	34.815	31.616	35.574	31.542
551.5	49.876	43.874	39.588	42.642	34.785	31.695	35.708	31.589
552	49.899	43.941	39.588	42.858	34.843	31.775	35.861	31.661
552.5	49.911	43.893	39.658	42.961	35.007	31.829	35.998	31.708
553	49.998	43.815	39.769	42.929	35.186	31.763	36.071	31.688
553.5	50.159	43.889	39.917	42.846	35.298	31.648	36.1	31.656
554	50.332	44.008	40.065	42.824	35.295	31.525	36.073	31.689
554.5	50.477	44.122	40.1	42.949	35.342	31.543	36.019	31.728
555	50.681	44.231	40.164	43.193	35.437	31.741	35.986	31.812
555.5	50.844	44.276	40.23	43.411	35.537	31.941	35.989	31.82
556	50.938	44.398	40.371	43.533	35.633	32.117	35.995	31.857
556.5	50.925	44.418	40.523	43.575	35.708	32.155	35.891	31.821
557	50.841	44.396	40.66	43.586	35.808	32.128	35.783	31.83
557.5	50.843	44.363	40.784	43.607	35.91	32.068	35.781	31.878
558	50.874	44.266	40.875	43.661	35.923	32.05	35.85	31.927
558.5	51.023	44.225	40.894	43.724	35.911	32.131	35.829	31.931
559	51.181	44.189	40.799	43.773	35.894	32.254	35.838	31.889
559.5	51.344	44.241	40.724	43.838	35.931	32.375	35.855	31.923
560	51.34	44.326	40.732	43.844	35.961	32.464	35.957	31.969
560.5	51.233	44.315	40.881	43.819	36.009	32.456	35.958	32.021
561	51.15	44.185	41.093	43.843	36.035	32.437	35.838	31.977
561.5	51.141	44.066	41.236	43.863	36.059	32.384	35.771	31.911
562	51.202	44.115	41.269	43.974	36.079	32.358	35.708	31.795
562.5	51.326	44.325	41.217	44.117	36.054	32.403	35.696	31.774
563	51.428	44.475	41.188	44.226	36.005	32.425	35.649	31.75
563.5	51.592	44.519	41.256	44.355	35.983	32.463	35.59	31.738
564	51.664	44.397	41.395	44.359	35.983	32.57	35.574	31.793
564.5	51.69	44.375	41.524	44.313	36.044	32.64	35.571	31.8
565	51.691	44.392	41.631	44.177	36.051	32.736	35.656	31.906
565.5	51.679	44.355	41.758	44.204	36.095	32.744	35.713	31.967
566	51.631	44.278	41.888	44.303	36.163	32.723	35.694	31.936
566.5	51.682	44.193	41.96	44.391	36.266	32.697	35.712	31.828
567	51.716	44.244	41.888	44.376	36.331	32.663	35.634	31.672
567.5	51.816	44.286	41.872	44.245	36.354	32.705	35.612	31.61
568	51.869	44.198	41.953	44.179	36.393	32.727	35.458	31.615
568.5	51.952	44.089	42.096	44.187	36.4	32.744	35.37	31.642
569	52.142	44.016	42.179	44.23	36.337	32.761	35.235	31.597
569.5	52.18	44.045	42.137	44.34	36.299	32.813	35.216	31.519
570	52.194	44.121	42.042	44.464	36.266	32.829	35.162	31.529
570.5	52.188	44.183	41.949	44.552	36.31	32.855	35.153	31.543
571	52.234	44.167	41.961	44.616	36.411	32.859	35.062	31.517
571.5	52.323	44.183	42.063	44.584	36.448	32.905	35.048	31.441
572	52.294	44.171	42.27	44.617	36.478	32.877	35.107	31.382
572.5	52.245	44.118	42.333	44.603	36.351	32.795	35.189	31.412
573	52.227	44.012	42.411	44.551	36.257	32.721	35.22	31.424
573.5	52.228	43.894	42.393	44.628	36.222	32.8	35.142	31.37
574	52.252	43.807	42.51	44.762	36.364	32.948	34.971	31.308
574.5	52.291	43.796	42.663	44.915	36.54	33.161	34.742	31.303
575	52.366	43.813	42.777	44.91	36.673	33.183	34.625	31.334
575.5	52.412	43.946	42.844	44.811	36.69	33.132	34.578	31.332
576	52.528	44.036	42.816	44.786	36.65	33.076	34.566	31.275
576.5	52.583	44.038	42.827	44.831	36.57	33.155	34.459	31.259
577	52.624	44.026	42.822	44.899	36.513	33.305	34.419	31.286
577.5	52.628	44.016	42.796	44.831	36.516	33.372	34.423	31.253
578	52.559	44.073	42.778	44.771	36.515	33.325	34.459	31.148
578.5	52.607	44.001	42.842	44.674	36.543	33.269	34.52	31.089
579	52.739	43.993	43.035	44.695	36.62	33.318	34.547	31.144
579.5	52.827	43.888	43.071	44.742	36.612	33.349	34.603	31.246
580	52.843	43.854	43.064	44.826	36.612	33.358	34.541	31.246
580.5	52.818	43.799	43.044	44.97	36.676	33.325	34.433	31.112
581	52.849	43.852	43.117	45.062	36.741	33.312	34.332	30.994
581.5	52.932	43.847	43.254	45.102	36.833	33.379	34.271	31.028
582	52.969	43.874	43.301	45.124	36.773	33.408	34.269	31.163
582.5	52.98	43.953	43.353	45.156	36.693	33.483	34.228	31.343
583	53.034	44.029	43.421	45.223	36.774	33.583	34.186	31.376
583.5	53.111	44.086	43.47	45.265	36.95	33.684	34.177	31.333
584	53.172	44.057	43.494	45.143	37.102	33.728	34.218	31.257
584.5	53.228	44.014	43.441	45.045	37.166	33.719	34.226	31.136
585	53.192	44.02	43.504	45.047	37.067	33.665	34.181	31.121
585.5	53.229	44.08	43.602	45.151	37.084	33.654	34.134	31.158
586	53.257	44.195	43.731	45.314	37.126	33.646	34.118	31.273
586.5	53.241	44.282	43.769	45.361	37.251	33.705	34.174	31.414
587	53.218	44.252	43.771	45.348	37.323	33.784	34.199	31.487
587.5	53.236	44.138	43.841	45.293	37.313	33.876	34.262	31.49
588	53.36	44.091	43.951	45.305	37.364	33.923	34.315	31.433
588.5	53.476	44.054	44.033	45.346	37.454	33.942	34.295	31.352
589	53.472	44.06	44.066	45.401	37.526	33.941	34.23	31.355
589.5	53.467	44.035	44.049	45.335	37.524	33.891	34.128	31.372
590	53.477	44.1	43.992	45.251	37.415	33.933	34.083	31.406
590.5	53.56	44.11	43.965	45.287	37.303	33.975	34.111	31.469
591	53.62	44.088	43.927	45.333	37.269	34.088	34.118	31.527
591.5	53.782	44.064	44.001	45.387	37.261	34.232	34.105	31.64
592	53.892	44.048	44.155	45.398	37.402	34.29	34.156	31.761
592.5	54.018	44.13	44.308	45.449	37.516	34.319	34.256	31.782
593	54.047	44.176	44.289	45.442	37.608	34.245	34.371	31.777
593.5	54.068	44.214	44.229	45.438	37.669	34.197	34.395	31.738
594	54.077	44.282	44.204	45.482	37.715	34.135	34.31	31.788
594.5	54.064	44.359	44.401	45.609	37.726	34.084	34.266	31.893
595	54.057	44.439	44.503	45.685	37.685	34.112	34.286	31.899
595.5	54.16	44.484	44.569	45.684	37.73	34.282	34.304	31.841
596	54.278	44.519	44.514	45.619	37.843	34.43	34.236	31.734
596.5	54.353	44.563	44.524	45.652	37.861	34.533	34.142	31.754
597	54.341	44.599	44.55	45.736	37.815	34.477	34.165	31.88
597.5	54.357	44.628	44.701	45.811	37.791	34.439	34.292	32.013
598	54.392	44.644	44.892	45.876	37.904	34.423	34.429	32.136
598.5	54.41	44.625	45.102	45.828	38.018	34.469	34.463	32.16
599	54.456	44.546	45.226	45.706	38.097	34.541	34.447	32.138
599.5	54.554	44.476	45.318	45.562	38.195	34.614	34.411	32.134
600	54.64	44.484	45.326	45.365	38.298	34.591	34.359	32.109
600.5	54.527	44.413	45.365	45.304	38.333	34.582	34.378	32.143
601	54.34	44.315	45.409	45.312	38.349	34.553	34.416	32.172
601.5	54.3	44.3	45.465	45.465	38.337	34.554	34.477	32.302
602	54.301	44.387	45.472	45.637	38.33	34.571	34.535	32.506
602.5	54.484	44.571	45.47	45.69	38.234	34.575	34.549	32.644
603	54.454	44.562	45.427	45.612	38.201	34.629	34.587	32.693
603.5	54.47	44.6	45.431	45.49	38.221	34.687	34.609	32.629
604	54.437	44.592	45.391	45.442	38.265	34.733	34.603	32.556
604.5	54.468	44.639	45.384	45.457	38.317	34.789	34.552	32.447
605	54.528	44.552	45.416	45.623	38.345	34.884	34.455	32.338
605.5	54.601	44.548	45.468	45.814	38.458	34.987	34.423	32.138
606	54.6	44.499	45.601	45.87	38.542	34.986	34.44	32.033
606.5	54.535	44.467	45.757	45.813	38.621	34.907	34.518	32.049
607	54.473	44.42	45.846	45.713	38.716	34.873	34.483	32.156
607.5	54.445	44.441	45.771	45.788	38.749	34.95	34.383	32.166
608	54.462	44.547	45.733	45.8	38.7	35.042	34.249	32.118
608.5	54.388	44.557	45.726	45.801	38.512	35.07	34.184	32.115
609	54.303	44.537	45.801	45.739	38.464	35.055	34.146	32.117
609.5	54.241	44.478	45.842	45.791	38.521	35.057	34.086	32.058
610	54.242	44.464	45.926	45.826	38.702	35.046	34.016	32.001
610.5	54.184	44.406	46.016	45.87	38.733	35.037	33.958	31.972
611	54.162	44.359	46.042	45.877	38.619	34.993	33.983	32.044
611.5	54.237	44.301	45.808	45.859	38.423	34.993	33.988	32.017
612	54.244	44.222	45.587	45.809	38.322	35.033	33.994	32.015
612.5	54.106	44.057	45.497	45.717	38.334	35.095	33.867	31.955
613	53.931	43.944	45.62	45.675	38.466	35.106	33.683	31.912
613.5	53.881	43.877	45.754	45.77	38.551	35.077	33.517	31.816
614	53.999	43.831	45.797	45.799	38.578	35.096	33.451	31.776
614.5	54.134	43.797	45.869	45.854	38.631	35.191	33.538	31.704
615	54.232	43.742	45.908	45.871	38.606	35.312	33.708	31.685
615.5	54.315	43.693	45.991	45.76	38.657	35.292	33.753	31.673
616	54.316	43.688	45.854	45.585	38.589	35.19	33.733	31.721
616.5	54.283	43.665	45.726	45.401	38.566	35.157	33.657	31.787
617	54.235	43.749	45.688	45.375	38.529	35.166	33.651	31.794
617.5	54.24	43.775	45.747	45.452	38.519	35.205	33.648	31.738
618	54.181	43.753	45.941	45.586	38.635	35.265	33.495	31.644
618.5	54.118	43.669	45.927	45.771	38.689	35.351	33.316	31.573
619	54.061	43.58	45.893	45.96	38.593	35.423	33.173	31.492
619.5	53.981	43.509	45.764	45.907	38.388	35.354	33.149	31.504
620	53.992	43.48	45.851	45.761	38.328	35.299	33.189	31.577
620.5	54.044	43.473	45.946	45.625	38.356	35.296	33.202	31.669
621	54.182	43.479	46.003	45.509	38.443	35.299	33.125	31.67
621.5	54.166	43.474	45.911	45.444	38.485	35.279	33.046	31.601
622	54.002	43.43	45.857	45.373	38.586	35.174	33.017	31.506
622.5	53.877	43.469	45.871	45.423	38.61	35.094	33.005	31.475
623	53.916	43.534	45.97	45.444	38.53	35.091	33.034	31.538
623.5	54.007	43.607	46.048	45.5	38.395	35.25	33.027	31.591
624	54.005	43.613	46.049	45.597	38.416	35.466	33.042	31.564
624.5	53.929	43.497	45.969	45.63	38.563	35.584	33.036	31.449
625	53.992	43.4	45.872	45.555	38.68	35.571	33.033	31.391
625.5	54.08	43.417	45.862	45.502	38.66	35.47	33.032	31.447
626	54.203	43.558	45.916	45.512	38.56	35.337	33.024	31.489
626.5	54.224	43.673	46.05	45.574	38.51	35.3	33.003	31.482
627	54.296	43.66	46.121	45.501	38.501	35.302	33.049	31.398
627.5	54.366	43.585	46.227	45.397	38.479	35.408	33.033	31.331
628	54.426	43.499	46.204	45.43	38.538	35.484	33.027	31.314
628.5	54.449	43.399	46.232	45.533	38.606	35.579	32.973	31.434
629	54.436	43.371	46.185	45.713	38.683	35.525	32.972	31.553
629.5	54.565	43.466	46.171	45.785	38.684	35.454	32.997	31.663
630	54.618	43.559	46.16	45.76	38.736	35.305	33.007	31.628
630.5	54.701	43.622	46.22	45.657	38.791	35.316	33.067	31.556
631	54.654	43.661	46.417	45.554	38.858	35.464	33.08	31.428
631.5	54.58	43.693	46.645	45.465	38.901	35.601	33.02	31.36
632	54.58	43.726	46.788	45.421	38.889	35.602	32.942	31.339
632.5	54.569	43.702	46.669	45.366	38.895	35.5	32.961	31.407
633	54.63	43.686	46.5	45.346	38.902	35.482	33.101	31.526
633.5	54.748	43.63	46.485	45.443	38.934	35.613	33.157	31.575
634	54.795	43.631	46.578	45.52	38.948	35.696	33.107	31.633
634.5	54.811	43.664	46.627	45.58	38.899	35.662	32.995	31.6
635	54.704	43.76	46.463	45.598	38.902	35.624	32.928	31.595
635.5	54.641	43.764	46.366	45.683	38.957	35.652	32.926	31.602
636	54.646	43.73	46.365	45.662	39.027	35.707	32.941	31.68
636.5	54.611	43.623	46.558	45.509	39.058	35.705	32.933	31.76
637	54.647	43.505	46.703	45.429	39.064	35.743	32.886	31.741
637.5	54.537	43.452	46.773	45.508	39.091	35.802	32.849	31.679
638	54.573	43.511	46.739	45.629	39.109	35.886	32.772	31.601
638.5	54.573	43.625	46.66	45.591	39.018	35.94	32.641	31.515
639	54.663	43.716	46.592	45.515	39.068	35.977	32.505	31.471
639.5	54.664	43.709	46.523	45.491	39.141	36.036	32.345	31.458
640	54.655	43.641	46.605	45.419	39.28	35.966	32.235	31.387
640.5	54.625	43.509	46.785	45.401	39.356	35.974	32.089	31.145
641	54.592	43.431	46.897	45.364	39.368	35.923	32.05	30.894
641.5	54.525	43.412	46.834	45.364	39.318	35.962	32.025	30.828
642	54.483	43.4	46.68	45.274	39.212	35.96	31.949	30.885
642.5	54.382	43.344	46.548	45.132	39.069	35.997	31.87	30.864
643	54.226	43.262	46.46	45.05	38.998	35.986	31.753	30.768
643.5	54.151	43.205	46.355	45.087	39.016	35.958	31.65	30.7
644	54.13	43.154	46.376	45.252	39.144	35.999	31.536	30.635
644.5	54.191	43.089	46.534	45.349	39.227	36.021	31.456	30.622
645	54.1	42.959	46.716	45.367	39.153	36.055	31.405	30.579
645.5	53.936	42.781	46.762	45.184	39.035	36.003	31.286	30.534
646	53.789	42.687	46.777	45.055	38.991	35.98	31.156	30.44
646.5	53.669	42.642	46.735	44.973	39.02	35.984	31.007	30.34
647	53.594	42.52	46.773	45.024	39.035	36.08	30.797	30.305
647.5	53.5	42.344	46.758	45.115	39.002	36.123	30.539	30.21
648	53.357	42.251	46.767	45.068	39.015	36.071	30.395	30.098
648.5	53.313	42.383	46.706	44.953	39.121	35.967	30.361	30.01
649	53.22	42.447	46.536	44.847	39.21	35.985	30.35	29.958
649.5	53.272	42.553	46.44	44.828	39.232	36.012	30.259	29.863
650	53.147	42.438	46.386	44.907	39.222	36.008	30.281	29.828
650.5	52.949	42.291	46.465	44.895	39.228	36.014	30.381	29.83
651	52.711	42.119	46.467	44.892	39.122	36.104	30.408	29.847
651.5	52.767	42.044	46.501	44.889	39.028	36.143	30.284	29.774
652	52.826	42.112	46.478	44.941	38.998	36.136	30.161	29.708
652.5	52.765	42.148	46.495	44.899	39.102	35.996	30.069	29.581
653	52.509	42.065	46.627	44.76	39.19	35.848	29.979	29.456
653.5	52.33	41.972	46.708	44.646	39.239	35.763	29.864	29.394
654	52.233	41.864	46.796	44.714	39.288	35.893	29.77	29.439
654.5	52.116	41.767	46.785	44.866	39.243	36.183	29.737	29.474
655	51.981	41.608	46.729	44.946	39.185	36.339	29.729	29.503
655.5	51.853	41.481	46.647	44.927	39.096	36.344	29.747	29.482
656	51.679	41.438	46.57	44.9	39.116	36.246	29.61	29.394
656.5	51.511	41.457	46.584	44.847	39.225	36.186	29.461	29.269
657	51.256	41.361	46.509	44.659	39.396	36.041	29.392	29.131
657.5	51.013	41.301	46.409	44.522	39.478	35.92	29.386	29.04
658	50.715	41.168	46.406	44.615	39.393	35.864	29.378	28.954
658.5	50.436	40.995	46.355	44.808	39.232	35.816	29.212	28.89
659	50.136	40.867	46.236	44.864	39.099	35.668	29.084	28.8
659.5	49.893	40.768	46.054	44.696	39.038	35.423	28.916	28.664
660	49.701	40.703	46.062	44.39	39.013	35.273	28.762	28.514
660.5	49.552	40.52	46.047	44.178	38.982	35.249	28.606	28.428
661	49.442	40.316	45.964	44.023	38.972	35.293	28.45	28.265
661.5	49.292	40.145	45.785	44.05	38.907	35.374	28.355	28.099
662	49.141	40.06	45.64	44.009	38.746	35.396	28.252	27.907
662.5	48.836	39.975	45.492	43.939	38.552	35.298	28.111	27.774
663	48.615	39.943	45.269	43.816	38.356	35.114	27.963	27.614
663.5	48.293	39.675	44.954	43.803	38.216	34.935	27.842	27.416
664	48.17	39.477	44.689	43.919	38.164	34.788	27.714	27.262
664.5	47.903	39.191	44.553	44.04	38.152	34.668	27.497	27.175
665	47.648	38.999	44.581	44.022	38.054	34.568	27.294	27.136
665.5	47.302	38.774	44.691	43.808	37.935	34.488	27.163	27.016
666	47.127	38.588	44.767	43.668	37.738	34.4	27.02	26.785
666.5	46.938	38.39	44.653	43.621	37.688	34.313	26.851	26.58
667	46.626	38.102	44.372	43.553	37.635	34.197	26.693	26.449
667.5	46.268	37.736	44.099	43.438	37.659	34.095	26.649	26.383
668	46.132	37.488	43.872	43.381	37.572	33.929	26.66	26.2
668.5	46.142	37.281	43.748	43.438	37.466	33.82	26.572	25.971
669	46.144	37.266	43.615	43.451	37.293	33.666	26.388	25.821
669.5	46.024	37.307	43.514	43.379	37.131	33.598	26.264	25.797
670	45.897	37.265	43.425	43.367	36.942	33.566	26.175	25.796
670.5	45.787	37.091	43.452	43.423	36.976	33.51	26.145	25.762
671	45.774	36.931	43.575	43.508	37.053	33.406	26.082	25.785
671.5	45.819	36.901	43.583	43.373	37.16	33.3	26.094	25.783
672	45.859	36.881	43.377	43.145	37.116	33.232	26.159	25.794
672.5	45.9	36.766	43.136	42.938	37.085	33.255	26.184	25.759
673	45.906	36.71	43.052	42.847	37.073	33.244	26.1	25.7
673.5	45.953	36.669	43.089	42.944	37.012	33.343	26.012	25.626
674	45.9	36.616	43.135	43.028	36.963	33.331	25.919	25.569
674.5	45.84	36.529	43.087	43.124	36.816	33.3	25.93	25.583
675	45.849	36.534	43.04	43.093	36.798	33.241	25.921	25.558
675.5	46.015	36.558	42.976	43.058	36.772	33.198	25.93	25.494
676	46.119	36.525	42.963	43.017	36.802	33.201	25.982	25.565
676.5	46.169	36.439	42.966	43.087	36.758	33.215	26.068	25.729
677	46.335	36.455	42.989	43.092	36.695	33.217	26.11	25.921
677.5	46.612	36.507	42.943	43.082	36.637	33.264	26.052	25.961
678	46.84	36.57	42.897	43.038	36.705	33.241	25.959	25.962
678.5	46.839	36.581	42.916	43.043	36.83	33.196	25.91	25.907
679	46.935	36.72	42.977	43.055	36.829	33.071	25.978	25.891
679.5	47.159	36.872	43.097	43.02	36.797	32.975	26.141	25.877
680	47.423	37.085	43.172	43.055	36.849	32.957	26.328	25.903
680.5	47.708	37.197	43.236	43.2	36.972	33.091	26.481	25.998
681	47.921	37.289	43.308	43.255	37.094	33.257	26.571	26.185
681.5	48.262	37.515	43.418	43.339	37.196	33.42	26.677	26.407
682	48.476	37.825	43.604	43.363	37.459	33.498	26.802	26.581
682.5	48.88	38.173	43.787	43.446	37.734	33.548	26.967	26.833
683	49.312	38.438	43.916	43.486	37.947	33.646	27.209	27.114
683.5	49.929	38.858	44.095	43.598	38.093	33.817	27.474	27.445
684	50.408	39.36	44.293	43.889	38.194	34.082	27.813	27.792
684.5	50.792	39.838	44.5	44.125	38.459	34.32	28.122	28.196
685	51.155	40.177	44.676	44.297	38.772	34.556	28.476	28.55
685.5	51.61	40.592	44.986	44.338	39.162	34.704	28.755	28.873
686	52.031	41.028	45.411	44.392	39.528	34.869	29.169	29.307
686.5	52.469	41.527	45.73	44.463	39.848	35.014	29.608	29.821
687	52.813	41.996	45.964	44.475	40.116	35.238	30.204	30.402
687.5	53.314	42.602	46.351	44.591	40.276	35.494	30.739	30.968
688	53.933	43.201	46.916	44.723	40.536	35.785	31.301	31.597
688.5	54.678	43.9	47.416	44.991	40.868	36.098	31.803	32.178
689	55.392	44.496	47.651	45.175	41.254	36.377	32.375	32.814
689.5	55.898	45.036	47.816	45.324	41.512	36.65	33.031	33.45
690	56.353	45.468	48.042	45.411	41.811	36.982	33.776	34.091
690.5	56.711	45.909	48.36	45.469	42.116	37.289	34.529	34.75
691	57.088	46.32	48.728	45.649	42.485	37.451	35.155	35.429
691.5	57.457	46.724	49.158	45.914	42.725	37.678	35.709	36.195
692	57.757	47.142	49.5	46.203	42.935	37.998	36.328	36.889
692.5	58.047	47.538	49.69	46.332	43.086	38.379	37.052	37.578
693	58.325	47.88	49.855	46.379	43.401	38.582	37.803	38.205
693.5	58.806	48.187	50.041	46.501	43.77	38.814	38.545	38.873
694	59.261	48.496	50.342	46.605	44.148	39.112	39.293	39.572
694.5	59.696	48.739	50.703	46.648	44.465	39.446	40.083	40.254
695	60.15	49.138	51.083	46.613	44.67	39.65	40.718	40.873
695.5	60.628	49.642	51.313	46.653	44.868	39.817	41.269	41.401
696	60.983	50.023	51.447	46.725	44.961	39.945	41.774	41.864
696.5	61.276	50.29	51.58	46.881	45.076	40.138	42.313	42.361
697	61.429	50.47	51.712	47	45.158	40.364	42.786	42.919
697.5	61.59	50.705	51.752	47.169	45.189	40.641	43.283	43.531
698	61.642	50.867	51.881	47.297	45.301	40.907	43.908	44.217
698.5	61.88	51.1	52.206	47.344	45.58	41.043	44.641	44.849
699	62.262	51.333	52.64	47.353	45.92	41.209	45.324	45.359
699.5	62.673	51.554	53.026	47.347	46.258	41.272	45.813	45.62
700	62.95	51.741	53.17	47.375	46.401	41.41	46.231	45.941
700.5	63.021	51.928	53.285	47.354	46.606	41.429	46.579	46.327
701	62.999	52.09	53.27	47.406	46.637	41.539	46.889	46.787
701.5	63.159	52.309	53.313	47.559	46.704	41.797	47.213	47.229
702	63.543	52.642	53.289	47.737	46.792	42.14	47.604	47.686
702.5	63.925	52.878	53.343	47.805	46.971	42.402	48.132	48.183
703	64.027	53.047	53.47	47.824	47.121	42.389	48.553	48.589
703.5	64.028	53.135	53.643	47.885	47.154	42.35	48.868	49.041
704	64.015	53.239	53.669	47.885	47.179	42.404	49.046	49.314
704.5	64.069	53.307	53.721	47.782	47.26	42.542	49.325	49.559
705	64.001	53.3	53.926	47.718	47.457	42.614	49.644	49.667
705.5	64.037	53.364	54.148	47.835	47.7	42.661	49.966	49.872
706	64.135	53.33	54.203	47.906	47.793	42.718	50.204	50.038
706.5	64.358	53.39	54.179	48.037	47.802	42.848	50.338	50.298
707	64.476	53.552	54.333	48.141	47.767	42.94	50.6	50.64
707.5	64.58	53.828	54.552	48.258	47.857	43.037	50.862	51.03
708	64.585	53.962	54.603	48.151	47.926	43.039	51.257	51.385
708.5	64.66	54.054	54.553	48.149	47.966	43.117	51.471	51.578
709	64.83	54.249	54.51	48.339	47.958	43.27	51.712	51.665
709.5	65.069	54.344	54.581	48.382	48.043	43.408	51.978	51.787
710	65.223	54.227	54.658	48.291	48.236	43.418	52.305	52.088
710.5	65.258	54.028	54.718	48.148	48.407	43.394	52.647	52.414
711	65.225	54.029	54.771	48.188	48.377	43.426	52.862	52.692
711.5	65.223	54.16	54.786	48.258	48.267	43.507	53.09	52.737
712	65.274	54.361	54.835	48.268	48.314	43.624	53.205	52.775
712.5	65.271	54.547	54.864	48.306	48.496	43.751	53.346	52.943
713	65.227	54.682	54.921	48.337	48.568	43.83	53.498	53.313
713.5	65.161	54.705	54.854	48.438	48.538	43.898	53.659	53.595
714	65.198	54.718	55.004	48.544	48.564	43.931	53.872	53.774
714.5	65.264	54.736	55.2	48.649	48.739	44.052	54.155	53.99
715	65.331	54.856	55.317	48.666	48.753	44.098	54.401	54.242
715.5	65.425	54.993	55.301	48.715	48.681	44.169	54.417	54.413
716	65.723	55.196	55.228	48.675	48.534	44.143	54.444	54.613
716.5	66.005	55.273	55.239	48.66	48.458	44.152	54.734	54.843
717	66.135	55.279	55.152	48.594	48.442	44.17	55.05	54.963
717.5	65.923	55.131	55.145	48.596	48.542	44.204	55.169	54.965
718	65.914	55.052	55.29	48.727	48.782	44.261	55.148	54.872
718.5	66.046	55.021	55.42	48.883	48.932	44.38	55.281	54.916
719	66.217	55.066	55.568	48.941	48.989	44.541	55.326	55.031
719.5	66.234	55.056	55.419	48.883	48.904	44.61	55.543	55.359
720	66.319	55.151	55.316	48.912	48.846	44.599	55.695	55.607
720.5	66.411	55.249	55.292	49.02	48.829	44.615	55.856	55.731
721	66.435	55.355	55.534	49.053	48.988	44.695	55.895	55.919
721.5	66.4	55.281	55.666	48.988	49.142	44.687	56.016	55.974
722	66.303	55.226	55.589	48.843	49.165	44.616	56.224	55.989
722.5	66.286	55.308	55.583	48.691	49.183	44.584	56.376	55.935
723	66.344	55.535	55.72	48.705	49.17	44.69	56.538	56.053
723.5	66.459	55.696	55.93	48.869	49.115	44.788	56.646	56.247
724	66.543	55.621	55.924	49.021	49.019	44.934	56.764	56.521
724.5	66.505	55.487	55.82	49.055	49.046	45.068	56.84	56.692
725	66.5	55.498	55.77	48.984	49.12	45.174	56.802	56.656
725.5	66.469	55.527	55.76	49.087	49.212	45.032	56.785	56.531
726	66.486	55.49	55.728	49.165	49.366	45.027	56.99	56.693
726.5	66.527	55.476	55.742	49.301	49.452	45.123	57.253	56.88
727	66.506	55.637	55.861	49.299	49.496	45.365	57.467	57.026
727.5	66.459	55.824	56.054	49.393	49.522	45.468	57.486	57.103
728	66.423	55.821	56.21	49.489	49.533	45.52	57.459	57.272
728.5	66.468	55.723	56.32	49.46	49.461	45.439	57.389	57.365
729	66.582	55.725	56.421	49.337	49.505	45.341	57.375	57.432
729.5	66.775	55.799	56.424	49.191	49.673	45.327	57.551	57.462
730	66.981	55.801	56.428	49.147	49.8	45.399	57.663	57.606
730.5	66.984	55.718	56.392	49.054	49.709	45.383	57.867	57.741
731	66.826	55.661	56.484	49.034	49.648	45.323	57.915	57.761
731.5	66.687	55.705	56.514	49.18	49.557	45.347	57.972	57.75
732	66.755	55.687	56.397	49.36	49.568	45.551	57.896	57.792
732.5	66.848	55.692	56.235	49.412	49.652	45.673	58.007	57.976
733	66.796	55.723	56.194	49.464	49.781	45.739	58.131	57.985
733.5	66.828	55.818	56.353	49.625	49.803	45.783	58.234	57.862
734	67.002	55.85	56.469	49.8	49.75	45.761	58.234	57.884
734.5	67.212	55.929	56.503	49.934	49.823	45.724	58.303	58.072
735	67.179	56.045	56.463	49.954	49.901	45.739	58.356	58.412
735.5	67.2	56.118	56.551	49.769	49.979	45.811	58.418	58.498
736	67.247	56.114	56.605	49.558	49.892	45.781	58.444	58.513
736.5	67.288	56.063	56.509	49.571	49.845	45.806	58.477	58.456
737	67.149	56.024	56.384	49.8	49.768	45.767	58.493	58.441
737.5	67.142	56.002	56.442	49.99	49.84	45.826	58.591	58.458
738	67.174	56.08	56.497	50.138	49.824	45.989	58.798	58.464
738.5	67.293	56.099	56.49	50.165	49.84	46.209	58.849	58.556
739	67.382	56.063	56.364	50.131	49.795	46.237	58.766	58.682
739.5	67.402	55.996	56.388	50.023	49.857	46.095	58.68	58.877
740	67.434	56.047	56.368	49.935	49.859	46.015	58.779	58.919
740.5	67.427	56.041	56.445	49.964	49.941	46.071	58.753	58.812
741	67.561	56.12	56.495	50.014	49.965	46.243	58.756	58.811
741.5	67.558	56.194	56.612	50.103	49.941	46.406	58.85	58.903
742	67.522	56.253	56.683	50.246	49.907	46.481	58.998	58.932
742.5	67.523	56.152	56.641	50.371	49.911	46.464	58.944	58.841
743	67.67	56.138	56.652	50.366	50.033	46.561	58.97	58.964
743.5	67.802	56.198	56.778	50.241	50.107	46.6	59.103	59.167
744	67.86	56.154	56.893	50.071	50.173	46.509	59.17	59.178
744.5	67.802	55.967	56.889	50.032	50.198	46.323	59.146	59.244
745	67.806	55.844	56.76	50.132	50.248	46.317	59.17	59.285
745.5	67.833	55.914	56.708	50.332	50.256	46.441	59.199	59.309
746	67.871	56.07	56.677	50.371	50.258	46.553	59.157	59.228
746.5	67.892	56.156	56.723	50.324	50.274	46.631	59.266	59.327
747	67.836	56.119	56.705	50.301	50.183	46.729	59.465	59.479
747.5	67.776	56.152	56.719	50.254	49.993	46.705	59.693	59.763
748	67.803	56.269	56.749	50.155	49.942	46.581	59.724	59.887
748.5	67.977	56.409	56.834	50.197	50.057	46.478	59.766	59.85
749	68.095	56.386	57.028	50.408	50.331	46.603	59.698	59.69
749.5	68.099	56.256	57.257	50.61	50.526	46.813	59.734	59.652
750	67.914	56.225	57.248	50.514	50.619	46.939	59.633	59.576
750.5	67.799	56.295	57.069	50.474	50.54	46.987	59.596	59.656
751	67.775	56.371	56.973	50.53	50.465	47.021	59.516	59.712
751.5	67.8	56.334	57.005	50.691	50.383	47.033	59.516	59.828
752	67.81	56.21	57.032	50.738	50.445	47.115	59.522	59.782
752.5	67.884	56.133	57.014	50.756	50.497	47.203	59.617	59.863
753	67.981	56.147	57.056	50.635	50.57	47.279	59.761	59.857
753.5	68.005	56.234	57.09	50.545	50.502	47.195	59.831	59.834
754	67.96	56.225	57.182	50.586	50.573	47.133	59.748	59.819
754.5	68.009	56.228	57.215	50.754	50.538	47.155	59.678	59.945
755	68.042	56.184	57.218	50.905	50.375	47.184	59.615	59.996
755.5	68.125	56.284	57.282	50.896	50.312	47.136	59.485	59.83
756	68.244	56.367	57.438	50.857	50.465	46.979	59.468	59.779
756.5	68.262	56.371	57.472	50.804	50.626	46.97	59.594	59.796
757	68.222	56.26	57.343	50.781	50.621	47.053	59.816	59.803
757.5	68.128	56.224	57.227	50.816	50.571	47.298	59.9	59.797
758	68.122	56.34	57.167	51.025	50.497	47.513	59.896	59.841
758.5	68.265	56.379	57.162	51.255	50.468	47.673	59.894	59.982
759	68.398	56.386	57.172	51.24	50.485	47.597	60.009	60.137
759.5	68.362	56.356	57.33	51.144	50.612	47.447	60.108	60.325
760	68.297	56.411	57.546	51.159	50.704	47.401	60.043	60.127
760.5	68.288	56.515	57.576	51.24	50.737	47.43	59.97	59.886
761	68.331	56.618	57.411	51.185	50.685	47.429	59.927	59.711
761.5	68.376	56.569	57.186	51.124	50.657	47.465	59.835	59.924
762	68.412	56.359	57.098	51.198	50.692	47.565	59.736	60.078
762.5	68.486	56.282	57.065	51.334	50.687	47.723	59.774	60.232
763	68.505	56.278	57.207	51.313	50.719	47.864	59.97	60.331
763.5	68.587	56.289	57.406	51.279	50.765	47.981	60.164	60.478
764	68.542	56.255	57.509	51.268	50.745	47.963	60.305	60.457
764.5	68.592	56.241	57.435	51.269	50.735	47.789	60.29	60.261
765	68.67	56.178	57.377	51.261	50.849	47.684	60.135	60.198
765.5	68.738	56.098	57.383	51.278	50.86	47.626	59.983	60.294
766	68.747	56.061	57.452	51.436	50.81	47.709	60.005	60.396
766.5	68.669	56.116	57.414	51.569	50.824	47.768	60.02	60.536
767	68.587	56.131	57.371	51.662	50.846	47.863	60.087	60.751
767.5	68.426	56.183	57.322	51.683	50.852	47.864	60.228	60.906
768	68.42	56.267	57.441	51.657	50.782	47.928	60.4	60.805
768.5	68.392	56.256	57.505	51.576	50.887	48.063	60.476	60.52
769	68.385	56.21	57.551	51.696	50.936	48.212	60.517	60.444
769.5	68.376	56.274	57.421	51.978	50.997	48.231	60.584	60.559
770	68.386	56.275	57.352	52.063	50.959	48.165	60.526	60.701
770.5	68.441	56.201	57.376	52.013	50.985	48.087	60.512	60.665
771	68.475	56.188	57.546	51.931	51.049	48.033	60.385	60.532
771.5	68.555	56.373	57.666	51.953	51.176	48.013	60.284	60.401
772	68.651	56.423	57.682	51.826	51.326	48.091	60.286	60.328
772.5	68.704	56.406	57.663	51.679	51.375	48.128	60.382	60.311
773	68.774	56.305	57.63	51.679	51.287	48.157	60.323	60.267
773.5	68.782	56.279	57.644	51.758	51.157	48.228	60.168	60.299
774	68.805	56.343	57.711	51.944	51.211	48.439	60.145	60.356
774.5	68.808	56.53	57.804	52.073	51.312	48.546	60.253	60.497
775	68.814	56.486	57.774	52.213	51.268	48.572	60.309	60.639
775.5	68.712	56.248	57.662	52.132	51.077	48.419	60.478	60.771
776	68.685	56.03	57.523	51.948	50.987	48.235	60.665	60.952
776.5	68.721	56.126	57.453	51.933	51.038	48.092	60.784	60.977
777	68.675	56.192	57.577	52.058	51.153	48.11	60.668	60.832
777.5	68.689	56.262	57.771	52.153	51.237	48.151	60.489	60.779
778	68.667	56.257	57.832	52.169	51.188	48.163	60.417	60.849
778.5	68.748	56.322	57.727	52.21	51.057	48.308	60.482	60.848
779	68.823	56.342	57.605	52.261	51.102	48.525	60.551	60.888
779.5	69.005	56.323	57.638	52.206	51.375	48.638	60.567	60.994
780	69.151	56.409	57.745	52.294	51.578	48.591	60.507	61.033
780.5	69.189	56.501	57.755	52.399	51.553	48.539	60.549	61.082
781	69.137	56.385	57.661	52.506	51.377	48.603	60.624	61.08
781.5	69.082	56.288	57.588	52.643	51.206	48.703	60.617	61.013
782	69.111	56.295	57.635	52.756	51.063	48.801	60.59	60.961
782.5	69.069	56.444	57.784	52.797	51.042	48.846	60.602	60.927
783	68.995	56.525	57.864	52.855	51.125	48.799	60.645	60.892
783.5	69.056	56.599	57.874	52.92	51.22	48.65	60.582	60.766
784	69.183	56.549	57.742	52.981	51.257	48.669	60.587	60.836
784.5	69.199	56.36	57.697	53.011	51.295	48.901	60.688	60.903
785	68.987	56.229	57.67	52.968	51.27	49.031	60.545	60.904
785.5	68.774	56.172	57.635	52.882	51.237	49.049	60.409	60.894
786	68.854	56.217	57.577	52.905	51.292	49.137	60.557	60.912
786.5	69.151	56.2	57.648	53.03	51.431	49.322	60.665	60.938
787	69.31	56.181	57.74	53.093	51.554	49.338	60.502	60.949
787.5	69.254	56.212	57.672	53.172	51.546	49.236	60.313	60.986
788	69.278	56.356	57.587	53.409	51.457	49.182	60.328	61.016
788.5	69.328	56.349	57.683	53.516	51.254	49.26	60.377	61.01
789	69.451	56.192	57.744	53.527	51.161	49.268	60.434	61.029
789.5	69.548	56.164	57.774	53.503	51.101	49.353	60.507	61.1
790	69.594	56.255	57.842	53.428	51.255	49.451	60.552	61.168
790.5	69.51	56.363	57.826	53.275	51.36	49.517	60.477	61.19
791	69.478	56.414	57.69	53.113	51.352	49.367	60.518	61.139
791.5	69.542	56.511	57.63	53.211	51.253	49.152	60.637	61.122
792	69.659	56.516	57.813	53.399	51.275	49.178	60.823	61.063
792.5	69.813	56.504	57.878	53.468	51.212	49.43	60.851	61.04
793	69.912	56.443	57.825	53.53	51.125	49.573	60.766	61.201
793.5	69.813	56.409	57.734	53.676	51.271	49.571	60.748	61.324
794	69.669	56.273	57.828	53.727	51.433	49.451	60.565	61.314
794.5	69.712	56.365	57.831	53.673	51.365	49.342	60.49	61.182
795	69.879	56.401	57.703	53.613	51.217	49.3	60.545	61.131
795.5	69.907	56.419	57.744	53.523	51.336	49.301	60.643	61.089
796	69.825	56.339	57.767	53.536	51.437	49.325	60.626	61.06
796.5	69.724	56.376	57.793	53.589	51.326	49.542	60.67	60.992
797	69.673	56.302	57.711	53.768	51.216	49.728	60.755	61.026
797.5	69.809	56.299	57.853	53.856	51.247	49.712	60.866	61.244
798	69.989	56.302	57.932	53.792	51.426	49.542	61.009	61.596
798.5	70.22	56.448	57.887	53.622	51.511	49.401	61.014	61.717
799	70.271	56.435	57.935	53.718	51.449	49.47	60.727	61.446
799.5	70.312	56.388	58.11	54.021	51.342	49.667	60.793	61.309
800	70.32	56.141	58.288	54.121	51.367	49.895	61.078	61.427
800.5	70.245	56.09	58.211	53.929	51.554	49.932	61.303	61.527
801	70.067	56.142	58.067	53.776	51.626	49.874	61.215	61.648
801.5	69.942	56.278	57.844	53.799	51.502	49.779	61.15	61.597
802	69.969	56.269	57.799	53.785	51.441	49.672	61.044	61.506
802.5	70.087	56.276	57.972	53.698	51.549	49.571	61.16	61.528
803	70.191	56.368	58.184	53.735	51.568	49.625	61.317	61.705
803.5	70.341	56.395	58.122	53.846	51.382	49.753	61.424	61.735
804	70.492	56.295	58.101	54.003	51.266	49.883	61.252	61.603
804.5	70.485	56.174	58.067	54.133	51.358	49.964	60.986	61.421
805	70.44	56.165	58.035	54.209	51.477	50.076	60.802	61.412
805.5	70.546	56.235	58.074	54.235	51.536	50.148	60.767	61.546
806	70.716	56.34	58.23	54.214	51.523	50.053	60.904	61.628
806.5	70.642	56.481	58.223	54.103	51.44	49.902	60.9	61.501
807	70.502	56.443	58.196	54.276	51.285	49.946	60.87	61.4
807.5	70.297	56.191	58.246	54.426	51.279	50.099	60.632	61.212
808	70.332	55.958	58.375	54.376	51.423	50.067	60.812	61.251
808.5	70.279	55.885	58.303	54.301	51.494	49.998	61.077	61.51
809	70.227	56.084	58.202	54.405	51.407	50.095	61.299	61.748
809.5	70.021	56.126	58.099	54.584	51.438	50.153	61.283	61.752
810	70.062	56.193	58.149	54.572	51.64	50.136	61.254	61.773
810.5	70.222	56.282	58.127	54.591	51.636	50.217	61.171	61.819
811	70.448	56.33	58.22	54.513	51.627	50.286	61.11	61.781
811.5	70.526	56.221	58.347	54.385	51.599	50.219	60.948	61.608
812	70.499	56.093	58.455	54.416	51.602	50.22	60.888	61.558
812.5	70.433	56.048	58.491	54.583	51.531	50.263	60.976	61.705
813	70.416	56.092	58.553	54.82	51.604	50.308	61.061	61.884
813.5	70.468	56.084	58.543	54.795	51.582	50.36	61.001	61.954
814	70.467	56.025	58.332	54.625	51.516	50.42	60.93	61.932
814.5	70.438	56.07	58.111	54.675	51.568	50.526	60.955	61.769
815	70.47	56.305	58.011	54.88	51.641	50.426	61.092	61.568
815.5	70.542	56.466	57.988	54.916	51.612	50.337	61.276	61.566
816	70.6	56.433	58.077	54.667	51.688	50.384	61.315	61.597
816.5	70.494	56.225	58.154	54.543	51.661	50.487	61.096	61.458
817	70.378	56.12	58.237	54.569	51.542	50.475	60.984	61.297
817.5	70.245	56.134	58.344	54.758	51.501	50.34	60.977	61.406
818	70.282	56.172	58.291	54.928	51.493	50.268	61.166	61.637
818.5	70.352	56.087	58.223	54.959	51.457	50.193	61.072	61.704
819	70.409	56.121	58.21	54.87	51.409	50.269	61.072	61.671
819.5	70.573	56.208	58.143	55.019	51.34	50.551	61.084	61.822
820	70.847	56.316	58.192	55.084	51.232	50.693	61.066	61.881
820.5	70.846	56.313	58.22	55.119	51.232	50.654	61.168	61.843
821	70.581	56.306	58.356	54.989	51.269	50.618	61.332	61.787
821.5	70.568	56.305	58.469	54.922	51.338	50.649	61.255	61.721
822	70.676	56.192	58.597	54.956	51.464	50.55	61.111	61.753
822.5	70.673	56.251	58.588	54.953	51.477	50.468	61.164	61.717
823	70.637	56.243	58.502	55.062	51.423	50.506	61.232	61.725
823.5	70.695	56.132	58.323	55.258	51.374	50.739	61.128	61.583
824	70.698	56.047	58.072	55.252	51.217	50.871	61.114	61.449
824.5	70.626	56.009	57.721	55.1	51.11	50.976	61.266	61.559
825	70.559	55.95	57.829	55.097	51.236	50.948	61.395	61.719
825.5	70.571	55.928	57.998	55.065	51.299	50.958	61.238	61.755
826	70.71	56.044	58.076	55.238	51.25	50.96	61.127	61.8
826.5	70.829	56.007	58.06	55.236	51.211	50.953	61.33	61.903
827	70.824	55.926	58.124	55.193	51.216	50.915	61.61	62.028
827.5	70.828	55.999	58.195	55.141	51.304	50.942	61.645	61.998
828	70.968	56.142	58.278	55.248	51.636	50.992	61.389	61.848
828.5	70.914	56.162	58.427	55.301	51.844	51.01	61.169	61.612
829	70.648	56.145	58.255	55.339	51.701	51.01	61.044	61.496
829.5	70.595	56.196	58.07	55.306	51.541	51.028	60.918	61.462
830	70.836	56.248	58.151	55.237	51.446	50.966	60.81	61.654
830.5	70.956	56.32	58.407	55.26	51.397	51.01	60.853	61.87
831	70.757	56.365	58.389	55.31	51.412	51.046	60.89	61.901
831.5	70.603	56.317	58.304	55.512	51.375	51.169	61.016	61.901
832	70.661	56.349	58.158	55.615	51.309	51.111	61.002	61.791
832.5	70.817	56.395	58.039	55.568	51.392	51.079	60.992	61.735
833	70.809	56.423	57.953	55.448	51.368	51.1	61.04	61.709
833.5	70.655	56.366	57.904	55.346	51.349	51.185	61.257	61.835
834	70.596	56.204	57.857	55.266	51.22	51.206	61.239	61.832
834.5	70.71	56.054	57.986	55.303	51.256	51.08	61.175	61.684
835	70.791	56.057	58.192	55.559	51.27	51.108	61.036	61.494
835.5	70.725	56.002	58.229	55.715	51.297	51.328	60.997	61.546
836	70.829	55.961	58.172	55.725	51.317	51.55	61.091	61.594
836.5	70.975	56.036	58.146	55.566	51.413	51.471	61.141	61.705
837	70.992	56.073	58.148	55.465	51.373	51.453	61.265	61.834
837.5	70.802	56.059	58.282	55.554	51.43	51.596	61.357	61.995
838	70.795	56.133	58.386	55.651	51.589	51.58	61.267	61.918
838.5	70.806	56.088	58.245	55.615	51.581	51.479	60.947	61.705
839	71.137	56.062	58.144	55.603	51.39	51.437	60.813	61.618
839.5	71.32	56.215	58.107	55.543	51.178	51.526	60.976	61.85
840	71.302	56.203	58.116	55.424	51.322	51.381	61.308	61.992
840.5	71.039	55.98	58.087	55.304	51.366	51.257	61.354	61.867
841	71.167	55.949	58.145	55.329	51.397	51.258	61.105	61.844
841.5	71.522	56.102	58.35	55.274	51.317	51.328	61.023	61.972
842	71.695	56.164	58.432	55.486	51.219	51.552	61.126	61.855
842.5	71.489	56.002	58.375	55.632	51.108	51.523	61.093	61.721
843	71.3	56.066	58.215	55.69	51.039	51.584	61.052	61.912
843.5	71.099	55.981	58.143	55.7	50.963	51.72	61.078	61.998
844	71.159	56.113	58.124	55.626	50.902	51.831	61.085	61.98
844.5	71.143	56.311	58.196	55.695	50.935	51.847	61.172	61.78
845	71.181	56.361	58.289	55.757	51.02	51.789	61.408	61.813
845.5	71.071	56.044	58.257	55.732	51.266	51.727	61.326	61.914
846	70.993	55.818	58.237	55.67	51.432	51.644	61.098	61.962
846.5	70.839	55.809	58.348	55.839	51.503	51.61	61.064	61.747
847	70.822	55.92	58.335	56.023	51.344	51.621	61.142	61.644
847.5	70.988	55.974	58.106	55.989	51.202	51.639	61.234	61.688
848	71.205	55.808	57.808	55.865	51.174	51.897	61.459	62.13
848.5	27.62	21.665	22.474	21.816	20.016	20.294	23.801	24.189
