# Supplementary material for: Tomato yellow leaf curl virus manipulates Bemisia tabaci, MEAM1 both directly and indirectly through changes in visual and volatile cues
Source: PeerJ. 2024 Jul 23;12:e17665. doi: 10.7717/peerj.17665 (PMC11276755; doi:10.7717/peerj.17665)
Supplement: Supplemental Information 5 [file peerj-12-17665-s005.xlsx]

## Sheet: Sheet1
wavelength	late.stage.tylcv.2.2.21.b.green1	late.stage.tylcv.2.3.21.a.g1	late.stage.tylcv.2.3.21.b.g1	g1a.feb16.1monthinfected.	g1b.feb16.1monthinfected.	g1b.feb17.infected.	g1.mar24.1month.infected	g1.late.stage.tylcv.leaf.3.16.21	g1.b.infected.1-month.3.23	g1.a.infected.1-month.3.23	g1.4.13.21.tylcv leaf. 1 monthinfected	g1.4.14.21.tylcv leaf. 1 monthinfected
184	0.001	0.001	0.001	0.001	0.001	0.001	0.001	0.001	0.001	0.001	0.001	0.001
184.5	0.001	0.001	0.001	0.001	0.001	0.001	0.001	0.001	0.001	0.001	0.001	0.001
185	0.001	0.001	0.001	0.001	0.001	0.001	0.001	0.001	0.001	0.001	0.001	0.001
185.5	0.001	0.001	0.001	0.001	0.001	0.001	0.001	0.001	0.001	0.001	0.001	0.001
186	0.001	0.001	0.001	0.001	0.001	0.001	0.001	0.001	0.001	0.001	0.001	0.001
186.5	0.001	0.001	0.001	0.001	0.001	0.001	0.001	0.001	0.001	0.001	0.001	0.001
187	0.001	0.001	0.001	0.001	0.001	0.001	0.001	0.001	0.001	0.001	0.001	0.001
187.5	0.001	0.001	0.001	0.001	0.001	0.001	0.001	0.001	0.001	0.001	0.001	0.001
188	0.001	0.001	0.001	0.001	0.001	0.001	0.001	0.001	0.001	0.001	0.001	0.001
188.5	0.001	0.001	0.001	0.001	0.001	0.001	0.001	0.001	0.001	0.001	0.001	0.001
189	0.001	0.001	0.001	0.001	0.001	0.001	0.001	0.001	0.001	0.001	0.001	0.001
189.5	72.378	107.46	110.08	175.33	228.32	89.176	-343.95	-70.499	-278.79	-199.75	-686.84	-17.448
190	143.55	229.53	270.23	380.33	641.63	152.21	-173.9	-7.6179	-141.21	-94.868	-294.78	-8.6506
190.5	-900.16	-2356	-2831.1	-6839.7	-10605	141.66	-66.825	13.958	-65.137	-43.806	-55.216	5.5054
191	-162.23	-379.25	-455.72	-218.1	-415.44	155.75	-64.082	19.167	-84.179	-40.474	-38.12	24.223
191.5	-199.73	-365.94	-376.81	-174.41	-308.8	233.5	-84.203	11.408	-84.903	-50.027	-25.342	30.128
192	-366.17	-558.6	-601.16	-121.18	-174.3	248.05	-85.111	14.222	-69.576	-42.631	-15.452	25.402
192.5	-796.63	-1179.2	-1312.1	-96.438	-126.95	300.62	-82.608	13.284	-64.114	-38.397	-9.3968	20.023
193	-2012.2	-3014.7	-3309.4	-80.354	-108.68	330.9	-84.052	2.6105	-68.173	-39.085	-3.7881	17.962
193.5	-2171.5	-3389.9	-3632.6	-83.631	-124.3	332.17	-83.478	-10.795	-78.434	-43.343	-2.469	17.83
194	-621.58	-1137.2	-1165.2	-84.907	-140.33	356.87	-74.76	-17.644	-79.889	-42.992	-2.9788	18.265
194.5	-330.72	-659.54	-638.99	-85.078	-152.51	349.49	-64.131	-12.266	-71.405	-38.155	-3.2477	19.419
195	-371.65	-715.7	-728.46	-99.095	-181.32	346.93	-48.023	8.0263	-57.375	-27.776	-6.5356	18.575
195.5	-408.67	-800.91	-857.22	-124.94	-214.07	345.93	-40.711	21.99	-45.432	-18.59	-12.441	12.442
196	1903.2	3380.5	3866	-142.4	-235.19	300.46	-48.011	25.855	-38.955	-15.851	-14.759	9.8867
196.5	1455.5	2587.5	2972.7	-147.1	-238.64	258.95	-51.377	23.139	-36.885	-14.152	-13.767	8.2548
197	875.29	1570.1	1750	-141.88	-205.72	240.33	-51.125	16.352	-39.054	-18.921	-13.172	6.9827
197.5	684.86	1177	1260.7	-117.76	-148.59	242.11	-48.575	19.13	-37.6	-26.84	-12.318	11.277
198	14462	22569	23553	-97.226	-106.22	265.32	-39.929	23.61	-37.409	-35.07	-14.307	12.674
198.5	7163.1	11174	11630	-98.472	-98.615	283.42	-41.797	23.363	-45.274	-48.301	-20.223	11.864
199	-567.21	-853.86	-966.43	-112.75	-116.98	263.47	-56.501	19.33	-58.986	-64.581	-22.769	12.477
199.5	-437.15	-617.06	-747.06	-113.53	-135.22	244.55	-63.263	15.682	-66.406	-67.858	-21.698	13.647
200	-435.55	-633.65	-804.46	-98.519	-134.17	239.49	-69.509	18.329	-66.251	-63.682	-17.4	17.894
200.5	-455.26	-687.43	-875.98	-73.646	-109.54	253.08	-72.051	23.447	-54.107	-54.612	-7.6479	21.223
201	-495.62	-767.97	-931.65	-52.881	-78.704	298.05	-68.103	26.152	-37.009	-40.884	-3.4725	19.503
201.5	-578.25	-990.18	-1152.5	-48.37	-65.485	318.15	-68.479	28.255	-26.436	-37.661	-3.8144	15.037
202	-363.12	-658.7	-776.25	-55.991	-70.443	329.44	-72.25	22.169	-31.441	-42.233	-3.5323	8.6132
202.5	-260.68	-450.5	-573.08	-68.132	-83.802	354.9	-68.022	19.068	-36.234	-43.81	-6.331	6.8366
203	-228.16	-350.34	-483.98	-79.209	-101.49	368.44	-69.21	20.683	-42.372	-47.905	-7.4264	13.222
203.5	-218.12	-284.95	-420.57	-83.43	-106.36	470.33	-81.461	16.39	-58.14	-56.856	-7.7545	19.466
204	-287.26	-349.15	-509.48	-75.767	-97.849	609.23	-90.491	16.189	-61.463	-65.218	-8.7902	23.893
204.5	-559.23	-728.23	-962.07	-74.243	-95.236	463.76	-110.52	12.393	-68.317	-79.682	-11.496	23.199
205	1990.5	3161.1	3717.6	-71.454	-91.516	329.39	-118.64	3.0465	-67.809	-87.27	-19.466	13.837
205.5	1049.3	2067.6	2238.2	-61.071	-89.087	269.62	-99.424	2.0656	-47.856	-68.659	-23.001	4.5533
206	1487.8	3299	3387.1	-55.684	-94.105	272.05	-82.803	3.1444	-38.333	-51.466	-20.392	1.7315
206.5	-894.11	-2068.3	-2088	-55.848	-102.97	303.79	-68.856	6.1946	-35.634	-40.956	-17.076	2.0431
207	-304.7	-679.98	-672.42	-56.232	-113.09	340.83	-53.433	17.203	-31.495	-30.242	-8.3164	6.9249
207.5	-285.49	-510.19	-545.14	-59.999	-132.64	361.87	-48.069	24.141	-31.152	-31.992	0.005346	10.32
208	-232.03	-387.06	-441.89	-55.647	-132.75	312.12	-52.848	21.706	-33.944	-39.596	3.5787	12.439
208.5	-153.36	-262.22	-313.36	-40.036	-110.33	286.94	-55.113	16.533	-34.719	-38.906	6.809	18.574
209	-106.06	-209.38	-268.36	-29.554	-94.641	302.99	-61.023	9.0098	-37.314	-40.148	5.6121	22.454
209.5	-78.939	-213.95	-275.48	-26.244	-87.756	335.77	-65.881	5.5722	-40.119	-35.108	1.8345	22.487
210	-109.1	-272.88	-342.8	-35.922	-89.057	387.97	-66.933	6.4075	-44.934	-26.257	1.5853	20.843
210.5	-184.13	-364.35	-451.93	-55.652	-97.615	387.02	-63.034	11.3	-42.673	-20.66	1.6455	15.721
211	-198.36	-317.45	-400.97	-71.682	-103.68	350.79	-59.309	18.348	-38.605	-16.429	4.3526	11.482
211.5	-145.84	-196.01	-257.45	-80.944	-104.47	305.24	-52.895	19.021	-35.056	-15.37	10.061	12.746
212	-109.19	-159.36	-205.14	-76.87	-100.57	273.45	-46.52	17.524	-31.047	-17.277	10.057	14.068
212.5	-104.9	-176.29	-218.94	-65.115	-95.066	303.78	-43.507	20.476	-32.036	-19.783	7.8371	16.438
213	-98.8	-193.22	-235.01	-54.181	-97.038	340.03	-45.418	17.022	-40.877	-27.077	6.0008	20.515
213.5	-107.61	-227.07	-263.35	-44.737	-95.316	384.85	-48.381	14.098	-49.007	-36.349	3.6186	24.044
214	-118.46	-246.43	-268.25	-37.687	-89.027	510.9	-45.681	17.25	-46.359	-37.484	2.2661	23.934
214.5	-110.3	-230.16	-237.91	-34.232	-87.587	493.32	-42.536	16.08	-40.654	-34.756	-1.3399	18.65
215	-147.24	-282.31	-284.39	-33.595	-79.563	520.98	-38.172	15.399	-30.927	-27.18	-4.7915	15.337
215.5	-241.14	-410.28	-437.44	-34.684	-75.378	541.85	-32.93	15.892	-20.532	-15.996	-6.3526	12.303
216	-294.29	-459.49	-550.49	-43.798	-89.397	393.55	-28.07	18.718	-13.398	-6.3189	-4.9637	11.222
216.5	-299.84	-463.05	-573.61	-49.974	-93.78	417.45	-24.979	19.244	-4.6742	0.68265	0.023296	13.768
217	-247.26	-400.52	-486.31	-55.777	-100.92	442.55	-19.163	20.682	2.804	6.8717	3.6609	14.051
217.5	-177.26	-330.41	-375.03	-67.154	-119.49	433.22	-13.23	23.54	5.7097	9.7172	5.592	13.291
218	-161.98	-352.31	-360.94	-64.093	-125.65	511.56	-13.682	21.222	2.903	4.7518	5.3198	12.735
218.5	-122.18	-309.19	-309.2	-59.408	-137.22	486.25	-18.235	17.393	-7.1133	-3.4967	4.5629	13.058
219	-94.508	-272.68	-294.83	-58.927	-148.51	438.49	-23.396	16.5	-14.538	-12.226	6.052	13.981
219.5	-75.096	-215.47	-252.8	-47.159	-134.83	414.11	-31.191	17.108	-17.348	-19.958	5.1211	13.549
220	-58.454	-142.18	-190.86	-40.154	-113.19	364.18	-36.306	18.678	-17.329	-22.07	3.8885	14.26
220.5	-53.125	-121.43	-181.85	-41.451	-97.999	343.69	-39.923	25.637	-19.795	-21.368	5.8219	16.215
221	-49.885	-102.65	-152.42	-47.354	-91.019	304.45	-48.874	30.245	-29.999	-24.66	4.6643	16.652
221.5	-50.813	-90.769	-129.46	-57.57	-88.379	256.07	-56.776	29.31	-43.634	-30.779	2.9964	18.579
222	-57.868	-109.95	-139.91	-67.167	-92.479	240.82	-51.855	28.218	-42.895	-27.752	4.3155	19.657
222.5	-73.556	-129.11	-154.56	-74.106	-104.56	210.83	-31.906	26.357	-25.643	-17.734	3.1012	19.463
223	-86.887	-150.42	-187.36	-76.236	-119.23	209.8	-18.097	24.433	-14.59	-11.048	3.6708	19.918
223.5	-112.06	-200.69	-263.64	-66.243	-125.74	264.61	-11.645	22.704	-10.622	-5.7209	6.6842	19.449
224	-122.79	-235.38	-308.85	-49.268	-118.18	376.18	-12.388	22.001	-14.278	-5.9158	8.3933	20.212
224.5	-149.9	-303.46	-390.16	-31.266	-98.105	716.35	-18.609	20.46	-22.379	-11.779	8.6485	20.24
225	-202.36	-375.01	-477.41	-19.474	-82.73	-3903.8	-22.088	16.876	-25.151	-14.485	9.4537	20.226
225.5	-164.96	-308.34	-389.24	-11.141	-68.592	-4187.5	-20.837	16.821	-21.676	-13.546	10.764	20.679
226	-143.44	-264.51	-327.22	-9.8479	-60.769	-753.67	-19.037	17.877	-14.402	-10.951	12.609	20.128
226.5	-136.19	-252.66	-292.36	-13.075	-58.071	-660.13	-17.72	18.119	-4.7257	-5.2715	14.232	19.283
227	-106.66	-235.11	-250.25	-11.694	-48.202	-528.03	-15.83	21.561	4.9449	-0.70205	15.445	19.184
227.5	-82.998	-221.06	-220.66	-11.388	-41.205	-520.83	-14.983	24.603	12.194	1.2208	15.338	18.371
228	-69.237	-184.91	-179.94	-11.451	-35.698	-364.51	-12.758	24.558	15.22	1.6896	12.758	17.471
228.5	-65.723	-145.91	-147.14	-6.9562	-30.21	-205.39	-9.6289	25.117	13.427	1.2918	11.98	17.76
229	-54.283	-105.06	-110.06	-6.3964	-29.258	-151.47	-7.8006	24.171	10.22	1.3505	12.402	18.686
229.5	-49.274	-79.409	-89.765	-5.4684	-27.407	-117.51	-5.0757	22.581	8.9523	2.7306	12.788	19.641
230	-33.115	-62.68	-81.312	-2.2642	-23.865	-88.319	-2.6932	23.063	8.7098	4.3916	14.134	20.52
230.5	-1.01	-40.791	-58.133	0.20755	-17.433	-64.454	0.4903	23.944	9.2876	5.9495	15.064	20.215
231	14.995	-23.447	-39.404	6.08	-8.3564	-36.062	4.1171	25.118	10.358	8.6717	14.939	19.176
231.5	22.759	-10.902	-25.201	11.253	-0.57491	-12.946	7.7597	27.095	11.711	12.253	15.048	18.481
232	24.556	-0.36345	-10.282	15.488	6.6782	5.0634	12.233	28.963	13.954	16.118	15.378	17.899
232.5	22.624	4.6023	-0.58773	19.787	12.817	16.167	15.213	29.399	15.723	18.677	15.503	18.024
233	21.981	7.7826	6.6661	22.786	17.459	22.732	17.301	29.58	17.456	19.993	15.836	18.385
233.5	23.431	12.143	12.726	25.506	21.172	28.154	19.164	29.437	18.71	20.716	16.302	18.747
234	27.224	17.481	16.61	27.536	23.563	31.208	20.529	29.198	19.495	21.502	16.868	18.964
234.5	32.149	24.584	20.25	29.108	24.987	34.438	22.1	29.663	20.893	22.666	17.164	18.861
235	37.045	29.88	23.621	30.718	26.673	37.514	23.633	30.186	22.239	23.525	17.196	18.646
235.5	39.81	32.476	26.782	31.618	27.767	39.452	24.744	30.57	23.252	24.303	17.254	18.498
236	40.821	33.884	30.162	32.294	28.264	40.848	25.426	30.722	23.998	24.973	17.151	18.442
236.5	41.146	34.997	32.909	32.696	28.789	41.749	25.698	30.533	24.667	25.388	17.205	18.519
237	41.007	35.526	34.726	32.943	29.207	42.06	25.826	30.152	24.899	25.795	17.303	18.487
237.5	41.37	35.691	35.733	33.417	29.779	42.422	25.827	29.911	25.195	25.994	17.268	18.32
238	41.822	36.081	36.03	34.189	30.615	42.964	26.036	29.745	25.686	26.133	17.325	18.204
238.5	41.616	36.086	35.934	34.796	31.149	43.133	26.367	29.642	25.86	26.316	17.369	18.063
239	41.185	36.201	35.948	35.335	31.355	43.265	26.523	29.659	26.07	26.515	17.355	17.974
239.5	40.695	36.648	36.284	35.523	31.462	43.239	26.716	29.682	26.288	26.66	17.35	17.959
240	40.26	36.654	36.603	35.474	31.704	43.252	26.846	29.653	26.463	26.687	17.322	17.865
240.5	40.094	36.668	36.924	35.616	32.111	43.192	26.999	29.621	26.669	26.833	17.285	17.723
241	40.027	36.7	37.416	35.738	32.629	43.013	27.335	29.699	26.911	27.139	17.236	17.512
241.5	39.884	36.574	37.788	36.015	33.063	43.058	27.687	29.718	27.088	27.535	17.16	17.285
242	39.697	36.548	37.937	36.291	33.297	42.984	27.859	29.66	27.125	27.774	17.055	17.102
242.5	39.488	36.466	38.031	36.314	33.501	42.883	27.878	29.529	27.058	27.772	16.914	16.95
243	39.512	36.561	37.958	36.285	33.545	42.828	27.933	29.447	26.992	27.659	16.833	16.84
243.5	39.597	36.734	37.912	36.128	33.46	42.638	27.998	29.38	26.957	27.55	16.79	16.754
244	39.657	36.988	38.162	35.927	33.357	42.618	28.153	29.359	26.987	27.599	16.764	16.698
244.5	39.691	36.994	38.302	35.868	33.236	42.549	28.3	29.369	27.118	27.719	16.762	16.656
245	39.44	36.685	38.176	35.96	33.186	42.439	28.301	29.296	27.255	27.859	16.766	16.634
245.5	39.046	36.342	37.8	36.155	33.223	42.306	28.252	29.22	27.397	28.005	16.75	16.58
246	38.596	35.987	37.215	36.269	33.281	42.021	28.275	29.186	27.471	28.073	16.703	16.501
246.5	38.156	35.876	36.694	36.315	33.344	41.872	28.364	29.139	27.549	28.105	16.673	16.468
247	37.8	35.815	36.317	36.246	33.402	41.786	28.536	29.071	27.607	28.099	16.657	16.442
247.5	37.743	35.758	36.128	36.198	33.539	41.72	28.719	29.044	27.582	28.032	16.663	16.406
248	37.684	35.612	35.953	36.262	33.695	41.67	28.78	29.025	27.547	28.018	16.717	16.38
248.5	37.579	35.372	35.899	36.3	33.796	41.517	28.776	29.043	27.534	28.064	16.778	16.356
249	37.527	35.122	35.916	36.352	33.831	41.295	28.756	29.061	27.56	28.153	16.82	16.344
249.5	37.21	34.807	35.8	36.329	33.772	41.097	28.703	29.021	27.647	28.248	16.894	16.379
250	36.912	34.595	35.744	36.241	33.659	40.924	28.649	28.937	27.731	28.242	16.959	16.446
250.5	36.763	34.482	35.635	36.196	33.559	40.807	28.685	28.864	27.786	28.236	16.998	16.488
251	36.681	34.514	35.608	36.189	33.525	40.714	28.74	28.849	27.821	28.23	17.058	16.52
251.5	36.621	34.656	35.661	36.184	33.522	40.59	28.84	28.855	27.859	28.193	17.126	16.567
252	36.53	34.735	35.505	36.155	33.528	40.449	28.996	28.892	27.932	28.196	17.186	16.572
252.5	36.469	34.69	35.355	36.115	33.505	40.35	29.051	28.861	27.949	28.172	17.271	16.599
253	36.381	34.552	35.144	36.07	33.505	40.227	29.009	28.761	27.926	28.059	17.364	16.658
253.5	36.287	34.325	34.891	36.023	33.444	40.094	28.922	28.69	27.899	28.043	17.433	16.704
254	36.23	34.147	34.758	35.926	33.321	39.985	28.818	28.627	27.888	28.088	17.512	16.783
254.5	36.101	34.027	34.626	35.776	33.192	39.792	28.749	28.596	27.857	28.113	17.615	16.875
255	35.945	33.901	34.446	35.617	33.044	39.565	28.724	28.542	27.815	28.158	17.695	16.965
255.5	35.928	33.832	34.325	35.5	32.957	39.252	28.713	28.412	27.724	28.129	17.789	17.061
256	35.882	33.739	34.239	35.454	32.949	38.954	28.704	28.232	27.603	28.081	17.877	17.125
256.5	35.756	33.584	34.076	35.427	32.978	38.807	28.671	28.006	27.465	27.989	17.926	17.173
257	35.511	33.385	33.92	35.417	32.953	38.793	28.609	27.818	27.327	27.884	17.997	17.231
257.5	35.16	33.126	33.802	35.339	32.917	38.873	28.541	27.675	27.217	27.797	18.03	17.297
258	34.829	32.851	33.694	35.203	32.855	38.884	28.469	27.583	27.148	27.708	18.061	17.373
258.5	34.539	32.661	33.632	35.098	32.757	38.76	28.393	27.527	27.145	27.646	18.123	17.424
259	34.406	32.562	33.612	34.948	32.644	38.547	28.321	27.464	27.133	27.545	18.15	17.416
259.5	34.364	32.546	33.538	34.822	32.504	38.277	28.214	27.358	27.036	27.405	18.196	17.406
260	34.335	32.519	33.436	34.749	32.357	38.084	28.065	27.261	26.944	27.306	18.229	17.428
260.5	34.311	32.456	33.386	34.661	32.22	37.91	27.932	27.196	26.862	27.226	18.218	17.439
261	34.223	32.313	33.304	34.538	32.118	37.72	27.791	27.113	26.807	27.184	18.217	17.482
261.5	34.158	32.11	33.224	34.378	31.983	37.577	27.671	27.047	26.791	27.132	18.228	17.494
262	34.092	31.982	33.264	34.195	31.868	37.425	27.581	26.935	26.727	26.994	18.243	17.464
262.5	34.025	31.952	33.228	34.046	31.803	37.34	27.525	26.806	26.627	26.887	18.229	17.441
263	34.045	32.026	33.067	33.921	31.761	37.286	27.505	26.733	26.556	26.824	18.217	17.4
263.5	33.999	32.124	32.854	33.859	31.752	37.212	27.461	26.657	26.49	26.775	18.188	17.376
264	33.939	32.068	32.613	33.816	31.719	37.104	27.402	26.596	26.41	26.784	18.166	17.349
264.5	33.799	31.848	32.464	33.774	31.7	36.972	27.318	26.545	26.355	26.767	18.163	17.306
265	33.523	31.596	32.38	33.725	31.654	36.897	27.2	26.492	26.264	26.688	18.114	17.249
265.5	33.328	31.419	32.377	33.645	31.559	36.787	27.126	26.456	26.196	26.601	18.064	17.191
266	33.204	31.412	32.351	33.625	31.471	36.644	27.053	26.43	26.149	26.478	18.026	17.188
266.5	33.247	31.471	32.258	33.575	31.302	36.443	26.979	26.342	26.105	26.372	18.002	17.207
267	33.324	31.479	32.22	33.522	31.15	36.278	26.942	26.219	26.031	26.337	17.992	17.25
267.5	33.317	31.381	32.123	33.484	31.128	36.163	26.891	26.113	25.953	26.315	17.985	17.282
268	33.324	31.158	31.985	33.392	31.133	36.069	26.852	26.044	25.903	26.275	17.984	17.245
268.5	33.16	30.953	31.871	33.286	31.169	36.04	26.762	26.013	25.856	26.187	18.014	17.233
269	33.055	30.851	31.748	33.201	31.226	36.054	26.675	25.981	25.841	26.059	18.06	17.2
269.5	32.995	30.774	31.635	33.135	31.233	35.997	26.588	25.915	25.803	25.921	18.081	17.157
270	32.92	30.77	31.57	33.064	31.121	35.912	26.498	25.825	25.737	25.865	18.086	17.157
270.5	32.953	30.803	31.469	33.06	30.965	35.764	26.408	25.747	25.673	25.862	18.084	17.144
271	32.946	30.865	31.519	33.017	30.836	35.517	26.306	25.662	25.638	25.885	18.061	17.14
271.5	32.885	30.903	31.555	32.951	30.706	35.371	26.203	25.567	25.614	25.906	18.02	17.119
272	32.759	30.851	31.363	32.903	30.688	35.296	26.078	25.456	25.574	25.84	17.975	17.083
272.5	32.623	30.763	31.219	32.783	30.675	35.221	26.037	25.411	25.501	25.761	17.887	17.051
273	32.52	30.646	31.017	32.696	30.592	35.097	26.014	25.404	25.408	25.651	17.831	17.014
273.5	32.446	30.593	30.812	32.584	30.524	34.989	25.98	25.415	25.311	25.506	17.811	17.01
274	32.364	30.551	30.828	32.436	30.45	34.879	25.961	25.381	25.232	25.411	17.799	16.969
274.5	32.335	30.523	30.909	32.36	30.401	34.798	25.923	25.279	25.17	25.293	17.817	16.911
275	32.316	30.53	31.01	32.308	30.36	34.777	25.849	25.134	25.08	25.206	17.806	16.888
275.5	32.328	30.481	31.096	32.24	30.236	34.672	25.818	25.014	25.007	25.15	17.767	16.881
276	32.251	30.411	30.972	32.185	30.171	34.57	25.766	24.98	24.978	25.101	17.697	16.908
276.5	32.116	30.281	30.723	32.082	30.092	34.519	25.71	24.966	24.945	25.091	17.612	16.913
277	31.971	29.953	30.46	32.007	29.997	34.503	25.683	24.944	24.938	25.06	17.537	16.857
277.5	31.787	29.724	30.345	31.954	29.974	34.493	25.687	24.932	24.976	25.086	17.487	16.784
278	31.666	29.58	30.358	31.86	29.932	34.432	25.679	24.859	25.019	25.051	17.476	16.722
278.5	31.545	29.488	30.36	31.777	29.946	34.292	25.617	24.776	25.021	24.979	17.458	16.689
279	31.467	29.584	30.366	31.691	29.954	34.05	25.602	24.715	25.031	24.947	17.43	16.66
279.5	31.457	29.622	30.242	31.64	29.936	33.88	25.538	24.64	25.003	24.855	17.396	16.619
280	31.471	29.586	29.985	31.617	29.908	33.791	25.483	24.614	24.894	24.787	17.351	16.572
280.5	31.484	29.558	29.757	31.559	29.794	33.74	25.452	24.58	24.842	24.749	17.324	16.542
281	31.444	29.448	29.556	31.508	29.64	33.768	25.381	24.51	24.827	24.69	17.308	16.551
281.5	31.473	29.372	29.548	31.486	29.464	33.751	25.287	24.423	24.766	24.66	17.292	16.55
282	31.456	29.321	29.689	31.46	29.28	33.664	25.169	24.319	24.718	24.668	17.254	16.527
282.5	31.34	29.258	29.826	31.407	29.191	33.599	25.136	24.297	24.667	24.678	17.23	16.497
283	31.183	29.208	29.951	31.372	29.231	33.547	25.085	24.294	24.53	24.67	17.243	16.484
283.5	31.001	29.156	29.954	31.266	29.275	33.478	25.058	24.262	24.405	24.638	17.267	16.496
284	30.846	29.037	29.868	31.172	29.294	33.463	25.028	24.2	24.304	24.507	17.288	16.508
284.5	30.794	28.946	29.705	31.135	29.211	33.351	24.948	24.107	24.254	24.357	17.287	16.484
285	30.786	28.911	29.499	30.99	29.068	33.257	24.847	24.048	24.259	24.237	17.225	16.457
285.5	30.779	28.756	29.326	30.875	28.926	33.184	24.785	24.006	24.254	24.165	17.154	16.425
286	30.754	28.546	29.142	30.841	28.842	33.058	24.785	23.977	24.228	24.169	17.092	16.386
286.5	30.595	28.281	28.959	30.789	28.885	32.975	24.738	23.947	24.127	24.171	17.038	16.363
287	30.366	27.97	28.773	30.7	28.913	32.834	24.693	23.896	24.019	24.103	17.001	16.337
287.5	30.213	27.892	28.695	30.554	28.872	32.632	24.626	23.871	23.946	24.027	16.952	16.292
288	30.088	27.954	28.702	30.312	28.726	32.484	24.558	23.871	23.891	23.993	16.918	16.283
288.5	29.946	27.927	28.546	30.051	28.547	32.339	24.517	23.859	23.905	23.961	16.925	16.278
289	29.813	27.903	28.309	29.885	28.406	32.178	24.479	23.816	23.934	23.983	16.927	16.234
289.5	29.609	27.767	28.041	29.788	28.334	32.056	24.462	23.766	23.971	24.005	16.934	16.21
290	29.472	27.599	27.877	29.79	28.321	31.934	24.467	23.674	23.99	23.966	16.924	16.182
290.5	29.42	27.563	27.851	29.824	28.338	31.866	24.467	23.594	23.95	23.971	16.881	16.151
291	29.423	27.537	27.909	29.868	28.38	31.911	24.497	23.625	23.915	24.054	16.843	16.123
291.5	29.468	27.574	27.972	29.954	28.34	31.909	24.51	23.662	23.957	24.128	16.798	16.096
292	29.577	27.706	28.016	30.035	28.289	31.912	24.536	23.695	24.031	24.23	16.771	16.075
292.5	29.654	27.677	28.06	30.086	28.231	31.909	24.598	23.694	24.089	24.323	16.779	16.058
293	29.563	27.555	27.971	30.046	28.144	31.826	24.641	23.7	24.084	24.319	16.794	16.026
293.5	29.452	27.489	27.835	29.999	28.174	31.825	24.666	23.764	24.1	24.323	16.817	15.985
294	29.333	27.392	27.767	29.956	28.281	31.867	24.666	23.828	24.144	24.325	16.802	15.925
294.5	29.279	27.353	27.78	29.941	28.327	31.9	24.692	23.876	24.245	24.29	16.748	15.866
295	29.382	27.335	27.842	29.928	28.296	31.96	24.775	23.928	24.4	24.346	16.687	15.862
295.5	29.465	27.178	27.86	29.915	28.316	32.053	24.919	23.955	24.52	24.416	16.598	15.887
296	29.608	27.045	27.892	29.849	28.263	32.055	25.025	23.932	24.573	24.458	16.503	15.922
296.5	29.717	27.061	27.846	29.787	28.215	31.969	25.02	23.934	24.583	24.491	16.442	15.915
297	29.706	27.089	27.83	29.811	28.206	31.803	24.943	23.904	24.571	24.503	16.442	15.872
297.5	29.642	27.17	27.857	29.822	28.126	31.546	24.823	23.844	24.513	24.533	16.5	15.837
298	29.421	27.152	27.781	29.847	28.078	31.471	24.696	23.841	24.442	24.543	16.575	15.829
298.5	29.166	27.079	27.718	29.901	28.107	31.397	24.714	23.856	24.357	24.565	16.59	15.857
299	28.923	26.975	27.611	29.906	28.165	31.411	24.781	23.836	24.308	24.53	16.548	15.884
299.5	28.808	26.851	27.457	29.783	28.064	31.474	24.79	23.804	24.249	24.467	16.504	15.902
300	28.732	26.765	27.339	29.682	27.833	31.375	24.794	23.829	24.243	24.439	16.478	15.881
300.5	28.711	26.627	27.247	29.666	27.663	31.392	24.686	23.793	24.226	24.364	16.474	15.851
301	28.716	26.526	27.194	29.697	27.573	31.455	24.648	23.753	24.195	24.277	16.505	15.833
301.5	28.736	26.528	27.241	29.743	27.642	31.461	24.652	23.713	24.162	24.17	16.513	15.823
302	28.771	26.639	27.305	29.729	27.709	31.376	24.611	23.627	24.087	24.074	16.494	15.826
302.5	28.807	26.809	27.292	29.611	27.683	31.266	24.567	23.539	24.006	23.97	16.477	15.828
303	28.802	26.913	27.259	29.389	27.624	31.113	24.464	23.478	23.923	23.864	16.419	15.802
303.5	28.675	26.811	27.024	29.215	27.671	30.97	24.389	23.452	23.838	23.816	16.358	15.774
304	28.592	26.618	26.785	29.07	27.738	30.857	24.377	23.402	23.775	23.808	16.341	15.759
304.5	28.5	26.447	26.657	28.974	27.751	30.668	24.357	23.373	23.764	23.881	16.339	15.775
305	28.351	26.363	26.605	28.934	27.634	30.546	24.354	23.341	23.731	23.97	16.384	15.796
305.5	28.168	26.323	26.671	28.894	27.392	30.462	24.432	23.353	23.758	24.003	16.469	15.797
306	27.992	26.338	26.672	28.868	27.236	30.403	24.436	23.335	23.766	23.909	16.491	15.789
306.5	27.861	26.345	26.573	28.795	27.137	30.366	24.361	23.209	23.705	23.739	16.496	15.76
307	27.861	26.357	26.444	28.726	27.101	30.292	24.243	23.065	23.676	23.63	16.5	15.756
307.5	27.964	26.372	26.323	28.632	27.105	30.206	24.079	22.945	23.604	23.616	16.517	15.766
308	28.019	26.275	26.199	28.528	27.071	30.217	23.955	22.92	23.578	23.618	16.568	15.785
308.5	28.069	26.218	26.151	28.494	27.039	30.273	23.907	22.965	23.565	23.586	16.558	15.808
309	28.012	26.127	26.097	28.486	26.998	30.33	23.841	23.015	23.532	23.489	16.483	15.795
309.5	27.881	25.983	25.976	28.544	26.997	30.352	23.79	23.015	23.522	23.39	16.383	15.766
310	27.759	25.825	25.978	28.571	26.964	30.301	23.769	22.965	23.421	23.394	16.325	15.737
310.5	27.666	25.633	25.937	28.595	26.936	30.199	23.712	22.865	23.32	23.368	16.318	15.72
311	27.638	25.553	25.868	28.526	26.842	30.084	23.619	22.718	23.249	23.332	16.354	15.723
311.5	27.618	25.536	25.82	28.408	26.639	29.995	23.525	22.569	23.125	23.262	16.341	15.706
312	27.612	25.646	25.751	28.269	26.499	29.892	23.524	22.521	23.117	23.243	16.288	15.689
312.5	27.532	25.69	25.71	28.144	26.417	29.774	23.56	22.571	23.15	23.276	16.241	15.641
313	27.399	25.624	25.612	28.064	26.438	29.656	23.62	22.674	23.174	23.279	16.198	15.601
313.5	27.308	25.551	25.503	27.979	26.425	29.603	23.69	22.771	23.22	23.241	16.216	15.572
314	27.165	25.399	25.329	27.956	26.398	29.503	23.679	22.816	23.22	23.166	16.243	15.56
314.5	26.971	25.351	25.148	27.934	26.336	29.388	23.671	22.782	23.217	23.069	16.269	15.582
315	26.838	25.282	25.025	27.954	26.228	29.283	23.623	22.649	23.186	22.995	16.28	15.615
315.5	26.79	25.254	24.974	27.971	26.26	29.224	23.499	22.494	23.166	22.951	16.268	15.655
316	26.823	25.267	25.012	27.933	26.231	29.256	23.388	22.364	23.144	22.945	16.238	15.692
316.5	26.968	25.23	25.068	27.862	26.142	29.302	23.309	22.282	23.105	23.024	16.177	15.715
317	27.074	25.223	25.124	27.697	26.094	29.246	23.318	22.256	23.091	23.076	16.123	15.669
317.5	27.118	25.178	25.127	27.524	25.982	29.109	23.351	22.312	23.107	23.133	16.081	15.599
318	27.093	25.142	25.051	27.447	25.939	29.016	23.344	22.375	23.072	23.131	16.07	15.529
318.5	27.118	25.104	24.923	27.454	25.964	28.938	23.285	22.425	23.038	23.021	16.092	15.477
319	27.109	25.149	24.893	27.513	25.951	28.912	23.184	22.374	22.996	22.902	16.103	15.48
319.5	27.073	25.132	24.843	27.523	25.983	28.895	23.177	22.273	22.998	22.817	16.105	15.516
320	27.04	24.989	24.767	27.433	26.021	28.857	23.203	22.147	22.997	22.748	16.104	15.504
320.5	26.836	24.739	24.722	27.302	26.052	28.83	23.204	22.087	22.979	22.755	16.067	15.478
321	26.618	24.48	24.524	27.195	26.026	28.691	23.173	22.159	22.967	22.748	16.012	15.431
321.5	26.456	24.393	24.381	27.091	25.836	28.527	23.123	22.243	22.948	22.744	15.99	15.379
322	26.311	24.487	24.239	27.015	25.665	28.386	23.102	22.283	22.937	22.769	15.939	15.346
322.5	26.282	24.694	24.229	27.039	25.619	28.226	23.079	22.261	22.928	22.741	15.885	15.325
323	26.275	24.795	24.293	27.118	25.677	28.198	23.053	22.178	22.971	22.706	15.885	15.315
323.5	26.224	24.787	24.304	27.225	25.78	28.322	23.008	22.079	22.973	22.653	15.871	15.289
324	26.167	24.76	24.402	27.229	25.773	28.415	22.957	22.008	22.949	22.605	15.904	15.29
324.5	26.173	24.734	24.498	27.162	25.643	28.533	22.914	22.004	22.882	22.565	15.936	15.272
325	26.071	24.586	24.593	27.144	25.557	28.578	22.899	22.027	22.812	22.521	15.863	15.223
325.5	26.024	24.452	24.685	27.111	25.487	28.438	22.874	22.011	22.788	22.456	15.759	15.213
326	26.012	24.266	24.544	27.051	25.415	28.268	22.834	21.953	22.801	22.421	15.699	15.205
326.5	26.001	24.169	24.304	26.893	25.317	28.133	22.799	21.84	22.787	22.428	15.67	15.195
327	26.12	24.263	24.149	26.7	25.237	28	22.782	21.749	22.73	22.49	15.709	15.214
327.5	26.073	24.267	24.086	26.587	25.152	27.887	22.799	21.743	22.674	22.53	15.746	15.245
328	25.964	24.218	24.144	26.533	25.106	27.829	22.835	21.711	22.642	22.541	15.733	15.291
328.5	25.86	24.155	24.224	26.514	25.051	27.768	22.831	21.691	22.61	22.493	15.748	15.379
329	25.744	24.078	24.187	26.425	24.985	27.764	22.775	21.672	22.541	22.347	15.763	15.44
329.5	25.703	24.011	23.995	26.297	24.894	27.731	22.628	21.731	22.504	22.149	15.788	15.426
330	25.625	23.922	23.767	26.236	24.816	27.633	22.514	21.754	22.483	21.953	15.826	15.389
330.5	25.517	23.824	23.587	26.211	24.745	27.481	22.48	21.72	22.508	21.853	15.844	15.317
331	25.483	23.872	23.581	26.232	24.691	27.328	22.465	21.632	22.516	21.831	15.839	15.292
331.5	25.495	24.081	23.74	26.22	24.693	27.251	22.437	21.472	22.505	21.867	15.843	15.296
332	25.524	24.347	23.855	26.135	24.636	27.241	22.355	21.373	22.431	21.892	15.84	15.305
332.5	25.503	24.398	23.734	26.085	24.617	27.272	22.245	21.366	22.342	21.847	15.8	15.353
333	25.587	24.354	23.584	26.022	24.573	27.239	22.141	21.363	22.272	21.844	15.794	15.356
333.5	25.699	24.192	23.353	26.024	24.588	27.17	22.136	21.362	22.222	21.89	15.753	15.321
334	25.726	24.002	23.245	25.979	24.632	27.109	22.135	21.311	22.2	21.903	15.713	15.279
334.5	25.614	23.857	23.286	25.926	24.551	27.061	22.116	21.267	22.178	21.847	15.697	15.251
335	25.316	23.639	23.324	25.94	24.428	27.031	22.045	21.207	22.133	21.773	15.688	15.237
335.5	25.055	23.509	23.471	25.964	24.312	27.066	22.026	21.162	22.115	21.766	15.675	15.229
336	25.022	23.533	23.608	25.943	24.18	27.043	22.086	21.141	22.121	21.839	15.658	15.173
336.5	25.103	23.641	23.598	25.849	24.21	27.034	22.129	21.097	22.059	21.884	15.678	15.161
337	25.224	23.757	23.462	25.758	24.26	27.089	22.133	21.071	21.963	21.848	15.702	15.193
337.5	25.195	23.801	23.279	25.662	24.251	27.087	22.076	21.091	21.885	21.785	15.777	15.244
338	25.112	23.683	23.171	25.605	24.275	27.069	21.95	21.081	21.822	21.745	15.827	15.261
338.5	25.052	23.525	23.2	25.531	24.261	27.01	21.912	21.089	21.814	21.724	15.767	15.178
339	25.122	23.467	23.267	25.401	24.227	26.858	21.945	21.119	21.844	21.748	15.679	15.102
339.5	25.201	23.418	23.23	25.326	24.203	26.789	21.938	21.186	21.854	21.702	15.597	15.075
340	25.152	23.402	23.038	25.331	24.154	26.765	21.853	21.192	21.864	21.663	15.571	15.11
340.5	25.038	23.387	22.904	25.427	24.181	26.787	21.732	21.149	21.86	21.59	15.585	15.146
341	24.893	23.33	22.844	25.536	24.234	26.831	21.619	21.08	21.843	21.502	15.631	15.179
341.5	24.861	23.4	22.873	25.568	24.198	26.796	21.609	20.982	21.811	21.452	15.655	15.2
342	24.907	23.514	22.998	25.46	24.049	26.711	21.748	21.009	21.789	21.459	15.654	15.22
342.5	25.002	23.573	23.098	25.364	23.83	26.637	21.883	21.044	21.83	21.585	15.674	15.241
343	24.868	23.54	23.026	25.348	23.736	26.622	21.976	21.036	21.926	21.689	15.641	15.245
343.5	24.648	23.412	22.828	25.362	23.752	26.565	22.028	21.049	22.011	21.779	15.637	15.276
344	24.422	23.31	22.658	25.405	23.814	26.56	21.922	20.95	22.056	21.774	15.649	15.287
344.5	24.275	23.275	22.534	25.286	23.855	26.484	21.763	20.814	21.946	21.655	15.607	15.278
345	24.374	23.282	22.717	25.171	23.811	26.433	21.568	20.775	21.724	21.573	15.589	15.25
345.5	24.577	23.335	22.965	25.097	23.776	26.524	21.423	20.753	21.547	21.488	15.562	15.226
346	24.693	23.331	23.106	25.117	23.757	26.517	21.36	20.807	21.463	21.39	15.58	15.267
346.5	24.75	23.346	23.21	25.124	23.711	26.48	21.427	20.941	21.496	21.357	15.627	15.298
347	24.743	23.358	23.2	25.109	23.758	26.367	21.466	20.944	21.523	21.253	15.693	15.343
347.5	24.55	23.262	23.151	25.103	23.785	26.255	21.489	20.83	21.446	21.231	15.74	15.318
348	24.494	23.206	23.045	25.049	23.714	26.128	21.497	20.65	21.347	21.229	15.727	15.286
348.5	24.423	23.055	22.806	24.932	23.586	26.033	21.468	20.46	21.259	21.16	15.696	15.237
349	24.371	22.846	22.576	24.8	23.339	25.986	21.465	20.397	21.257	21.16	15.634	15.175
349.5	24.364	22.799	22.56	24.595	23.182	25.877	21.49	20.456	21.401	21.155	15.607	15.148
350	24.272	22.715	22.698	24.461	23.165	25.807	21.525	20.516	21.477	21.132	15.61	15.128
350.5	24.199	22.649	22.824	24.462	23.162	25.696	21.525	20.523	21.425	21.014	15.612	15.138
351	24.027	22.486	22.782	24.47	23.14	25.655	21.437	20.478	21.404	20.85	15.608	15.144
351.5	23.899	22.309	22.643	24.593	23.115	25.727	21.321	20.41	21.439	20.761	15.618	15.133
352	23.78	22.253	22.497	24.648	23.081	25.819	21.206	20.382	21.539	20.75	15.59	15.126
352.5	23.662	22.215	22.553	24.64	23.127	25.867	21.134	20.391	21.609	20.912	15.524	15.123
353	23.601	22.174	22.596	24.658	23.19	25.783	21.238	20.468	21.583	21.066	15.436	15.129
353.5	23.484	22.048	22.546	24.575	23.17	25.651	21.28	20.548	21.455	21.043	15.359	15.124
354	23.365	21.881	22.486	24.577	23.145	25.557	21.297	20.556	21.334	21.002	15.334	15.115
354.5	23.308	21.749	22.212	24.604	23.131	25.501	21.289	20.487	21.283	20.916	15.371	15.103
355	23.173	21.691	22.071	24.59	23.206	25.516	21.17	20.364	21.225	20.866	15.447	15.094
355.5	23.069	21.72	22.043	24.586	23.271	25.599	21.038	20.238	21.107	20.921	15.49	15.106
356	22.915	21.758	21.929	24.604	23.303	25.586	20.939	20.201	21.017	20.991	15.492	15.1
356.5	22.857	21.878	21.97	24.641	23.334	25.632	20.928	20.237	20.943	21.021	15.511	15.099
357	22.91	22.031	21.886	24.703	23.248	25.573	20.984	20.223	20.985	20.945	15.534	15.07
357.5	22.958	22.149	21.736	24.729	23.247	25.53	21.089	20.229	21.135	20.889	15.576	15.071
358	22.969	22.257	21.758	24.633	23.186	25.559	21.186	20.309	21.321	20.864	15.618	15.126
358.5	23.016	22.259	21.859	24.448	23.055	25.513	21.197	20.365	21.364	20.874	15.583	15.169
359	23.206	22.179	21.988	24.353	23.011	25.462	21.095	20.398	21.233	20.917	15.522	15.169
359.5	23.328	22.018	22.042	24.36	22.9	25.409	20.981	20.366	20.987	20.851	15.501	15.113
360	23.47	21.996	22.043	24.408	22.796	25.465	20.883	20.28	20.806	20.744	15.481	15.046
360.5	23.451	21.984	22.028	24.344	22.697	25.508	20.815	20.157	20.755	20.662	15.466	15.072
361	23.176	21.842	22.028	24.233	22.579	25.583	20.713	20.061	20.854	20.686	15.425	15.121
361.5	23.027	21.726	22.002	24.11	22.531	25.499	20.551	19.981	20.972	20.739	15.358	15.134
362	22.942	21.5	21.941	24.049	22.619	25.332	20.453	19.962	20.941	20.752	15.34	15.104
362.5	22.88	21.411	21.852	24.091	22.666	25.201	20.461	20.035	20.937	20.758	15.324	15.047
363	22.872	21.372	21.629	24.12	22.736	25.213	20.588	20.075	20.915	20.72	15.331	15.025
363.5	22.896	21.356	21.478	24.206	22.737	25.31	20.725	20.006	20.946	20.6	15.307	15.039
364	22.728	21.253	21.284	24.317	22.593	25.493	20.748	19.865	21.024	20.536	15.299	15.054
364.5	22.649	21.196	21.288	24.442	22.584	25.585	20.728	19.704	21.023	20.541	15.354	15.09
365	22.59	21.222	21.488	24.499	22.553	25.465	20.683	19.614	20.972	20.559	15.448	15.124
365.5	22.487	21.233	21.574	24.458	22.597	25.315	20.529	19.491	20.846	20.65	15.539	15.18
366	22.464	21.287	21.703	24.39	22.807	25.087	20.392	19.374	20.754	20.668	15.553	15.208
366.5	22.443	21.349	21.692	24.271	22.879	25.132	20.306	19.341	20.707	20.649	15.496	15.234
367	22.274	21.337	21.693	24.153	22.863	25.248	20.415	19.356	20.722	20.636	15.433	15.279
367.5	22.149	21.311	21.827	24.063	22.84	25.286	20.603	19.449	20.807	20.563	15.457	15.351
368	22.044	21.217	21.753	24.01	22.702	25.227	20.667	19.544	20.859	20.5	15.438	15.31
368.5	21.896	21.039	21.603	23.888	22.49	25.025	20.615	19.513	20.839	20.352	15.369	15.31
369	21.984	21.057	21.327	23.856	22.302	24.888	20.358	19.474	20.805	20.219	15.326	15.321
369.5	22.139	20.993	21.062	23.829	22.128	24.722	20.135	19.399	20.75	20.232	15.292	15.308
370	22.214	20.891	20.881	23.923	22.166	24.729	20.053	19.39	20.707	20.326	15.382	15.36
370.5	22.232	20.792	20.852	24.063	22.25	24.798	20.024	19.473	20.664	20.539	15.494	15.305
371	22.137	20.782	20.885	24.095	22.321	24.935	20.028	19.498	20.557	20.643	15.493	15.21
371.5	22.13	20.991	21.127	24.137	22.321	25.134	19.934	19.467	20.495	20.55	15.445	15.194
372	22.29	21.326	21.36	24.104	22.368	25.263	19.825	19.458	20.504	20.404	15.404	15.187
372.5	22.45	21.459	21.294	24.167	22.561	25.328	19.767	19.413	20.575	20.219	15.406	15.216
373	22.351	21.331	21.133	24.291	22.717	25.423	19.766	19.432	20.63	20.172	15.429	15.238
373.5	22.268	21.299	21.048	24.205	22.676	25.349	19.939	19.447	20.633	20.247	15.474	15.253
374	22.348	21.315	21.198	23.993	22.47	25.17	20.043	19.386	20.644	20.304	15.498	15.321
374.5	22.465	21.276	21.563	23.618	22.275	24.842	20.076	19.338	20.705	20.408	15.547	15.405
375	22.791	21.272	21.887	23.355	22.159	24.659	20.127	19.36	20.798	20.542	15.649	15.45
375.5	22.874	21.178	21.863	23.427	22.099	24.644	20.096	19.363	20.828	20.533	15.702	15.427
376	22.86	21.129	21.653	23.645	22.097	24.712	20.148	19.365	20.847	20.496	15.687	15.389
376.5	22.855	21.305	21.531	23.915	22.23	24.938	20.137	19.287	20.836	20.477	15.594	15.341
377	22.812	21.447	21.421	24.116	22.375	25.023	20.115	19.176	20.827	20.369	15.476	15.407
377.5	22.653	21.462	21.388	24.082	22.456	24.973	20.024	19.048	20.799	20.291	15.432	15.506
378	22.481	21.478	21.362	23.912	22.306	24.82	20.018	19.024	20.744	20.263	15.475	15.592
378.5	22.349	21.518	21.281	23.741	21.925	24.577	20.014	19.107	20.682	20.133	15.506	15.616
379	22.271	21.622	21.234	23.592	21.696	24.392	19.95	19.249	20.645	20.1	15.549	15.58
379.5	22.337	21.765	21.363	23.564	21.625	24.29	20.058	19.376	20.584	20.172	15.581	15.537
380	22.369	21.63	21.4	23.506	21.68	24.271	20.114	19.435	20.554	20.182	15.58	15.545
380.5	22.253	21.413	21.32	23.443	21.801	24.425	20.19	19.494	20.597	20.299	15.681	15.568
381	22.065	21.286	21.395	23.423	21.752	24.515	20.194	19.527	20.721	20.421	15.793	15.617
381.5	22.037	21.386	21.484	23.536	21.729	24.586	20.039	19.477	20.808	20.437	15.871	15.683
382	22.133	21.701	21.641	23.683	21.73	24.476	19.837	19.319	20.824	20.388	15.923	15.752
382.5	22.296	21.963	21.717	23.711	21.706	24.351	19.726	19.155	20.848	20.333	15.83	15.852
383	22.393	22.103	21.577	23.739	21.702	24.357	19.672	19.049	20.858	20.207	15.694	15.862
383.5	22.338	21.925	21.371	23.593	21.566	24.512	19.686	19.059	20.865	20.234	15.619	15.9
384	22.262	21.648	21.456	23.49	21.375	24.47	19.787	19.142	20.797	20.321	15.648	15.96
384.5	22.351	21.366	21.627	23.325	21.164	24.402	19.709	19.179	20.606	20.363	15.771	16.018
385	22.395	21.3	21.761	23.052	20.962	24.053	19.68	19.267	20.575	20.415	15.869	16.041
385.5	22.432	21.418	21.856	23.01	20.918	23.884	19.585	19.3	20.682	20.418	15.92	15.969
386	22.512	21.641	21.709	22.974	20.846	24.001	19.555	19.253	20.921	20.391	15.925	15.898
386.5	22.555	21.796	21.43	23.048	20.972	24.051	19.668	19.204	21.093	20.294	15.893	15.953
387	22.536	21.688	21.155	23.089	21.079	24.16	19.62	19.111	20.966	20.273	15.952	16.097
387.5	22.535	21.61	21.027	22.983	21.129	24.125	19.614	19.058	20.712	20.298	16.041	16.24
388	22.591	21.558	21.227	22.939	21.146	23.951	19.495	18.978	20.479	20.223	16.133	16.299
388.5	22.604	21.651	21.469	23.026	21.079	23.823	19.449	18.993	20.458	20.295	16.277	16.284
389	22.598	21.774	21.477	23.145	21.151	23.57	19.514	19.119	20.66	20.34	16.36	16.278
389.5	22.4	21.831	21.267	23.253	21.191	23.408	19.669	19.257	20.796	20.402	16.383	16.241
390	22.241	21.784	20.983	23.285	21.17	23.321	19.848	19.297	20.719	20.504	16.335	16.287
390.5	22.121	21.591	20.91	23.085	21.019	23.382	19.935	19.316	20.625	20.532	16.292	16.264
391	22.065	21.532	21.087	22.785	20.649	23.443	19.915	19.154	20.398	20.51	16.31	16.306
391.5	21.967	21.263	21.046	22.717	20.407	23.451	19.769	18.921	20.285	20.323	16.358	16.359
392	21.987	21.014	20.953	22.842	20.224	23.555	19.655	18.822	20.203	20.174	16.394	16.343
392.5	22.057	20.973	20.949	23.067	20.24	23.669	19.6	18.718	19.961	19.963	16.441	16.301
393	22.241	21.019	20.869	23.131	20.471	23.673	19.639	18.843	19.864	19.939	16.469	16.276
393.5	22.3	21.154	21.009	22.836	20.598	23.679	19.702	19.007	19.917	20.025	16.62	16.332
394	22.293	21.279	21.201	22.641	20.811	23.687	19.646	19.071	20.067	20.095	16.727	16.379
394.5	22.335	21.379	21.281	22.815	20.764	23.504	19.522	19.126	20.197	20.141	16.753	16.507
395	22.2	21.38	21.39	23.019	20.55	23.352	19.42	19.079	20.043	20.169	16.693	16.629
395.5	22.049	21.463	21.27	23.052	20.305	22.93	19.544	19.164	19.842	20.405	16.641	16.77
396	21.824	21.548	20.788	22.947	20.145	22.668	19.853	19.254	19.79	20.55	16.638	16.871
396.5	21.852	21.716	20.443	22.665	20.093	22.701	20.193	19.252	20.034	20.515	16.667	16.926
397	22.048	21.967	20.349	22.523	20.108	22.895	20.184	19.106	20.438	20.327	16.75	16.932
397.5	22.316	21.921	20.301	22.365	20.106	23.077	19.96	18.732	20.536	20.073	16.82	16.932
398	22.396	21.655	20.238	22.319	19.958	23.106	19.681	18.498	20.453	19.922	16.9	16.945
398.5	22.23	21.24	20.104	22.496	19.996	23.206	19.512	18.654	20.313	20.078	16.995	16.899
399	22.262	20.99	20.171	22.73	20.201	23.184	19.488	18.909	20.273	20.245	16.97	16.835
399.5	22.301	21.15	20.591	22.864	20.353	23.043	19.295	19.023	20.347	20.35	16.983	16.848
400	22.251	21.244	20.99	22.698	20.203	22.683	19.138	19.074	20.541	20.385	17.094	16.978
400.5	22.014	21.338	21.106	22.464	19.929	22.287	19.025	19.06	20.582	20.275	17.156	17.113
401	21.682	21.268	21.125	22.238	19.668	22.174	19.003	19.189	20.673	20.358	17.129	17.118
401.5	21.642	20.977	21.038	22.047	19.606	22.226	19.23	19.475	20.682	20.613	17.005	16.969
402	21.813	20.853	21.037	21.816	19.822	22.483	19.273	19.587	20.638	20.763	16.904	16.81
402.5	22.181	20.871	20.873	21.729	19.955	22.615	19.398	19.637	20.623	20.862	16.875	16.813
403	22.421	21.004	20.659	21.775	19.984	22.636	19.484	19.491	20.483	20.712	16.978	16.989
403.5	22.43	21.229	20.431	21.814	19.826	22.527	19.48	19.247	20.523	20.516	17.019	17.175
404	22.35	21.452	20.384	22.063	19.641	22.335	19.502	18.988	20.468	20.504	17.105	17.234
404.5	22.301	21.63	20.581	22.221	19.431	22.3	19.345	18.79	20.36	20.386	17.288	17.18
405	22.361	21.666	20.862	22.164	19.384	22.329	19.176	18.693	20.312	20.356	17.374	17.041
405.5	22.404	21.44	20.996	21.998	19.424	22.421	19.137	18.662	20.394	20.339	17.463	17.022
406	22.334	21.182	20.829	21.622	19.425	22.307	19.232	18.78	20.641	20.39	17.524	17.101
406.5	22.241	21.021	20.59	21.51	19.48	22.076	19.394	18.944	20.825	20.562	17.494	17.259
407	22.139	21.063	20.512	21.678	19.448	21.928	19.363	18.983	20.828	20.513	17.431	17.344
407.5	22.216	21.47	20.816	21.863	19.482	21.79	19.378	18.974	20.635	20.425	17.391	17.315
408	22.327	21.8	21.188	22.111	19.699	21.931	19.325	18.914	20.377	20.279	17.3	17.192
408.5	22.315	21.868	21.329	22.119	19.959	22.078	19.36	18.934	20.412	20.188	17.275	17.151
409	22.534	21.83	21.252	22.224	20.143	22.142	19.412	19.143	20.474	20.259	17.257	17.229
409.5	22.586	21.628	20.976	22.21	19.949	22.091	19.263	19.258	20.36	20.263	17.211	17.261
410	22.634	21.507	20.697	22.082	19.567	22.079	19.029	19.186	20.209	20.202	17.166	17.244
410.5	22.572	21.494	20.612	21.814	19.207	22.097	19.054	19.066	19.99	20.196	17.201	17.21
411	22.367	21.418	20.397	21.457	18.983	22.308	19.082	18.915	19.9	20.192	17.23	17.185
411.5	22.261	21.399	20.278	21.328	18.99	22.504	19.293	18.92	20.11	20.347	17.38	17.247
412	22.195	21.413	20.283	21.298	19.039	22.407	19.383	18.889	20.275	20.246	17.457	17.259
412.5	22.271	21.538	20.48	21.34	19.096	22.073	19.414	18.846	20.396	20.197	17.419	17.132
413	22.453	21.807	20.986	21.386	19.188	21.655	19.474	18.664	20.457	20.105	17.398	17.089
413.5	22.563	21.86	21.409	21.407	19.201	21.344	19.58	18.538	20.464	20.028	17.31	17.054
414	22.593	21.959	21.65	21.551	19.138	21.229	19.61	18.477	20.488	20.085	17.255	17.152
414.5	22.399	21.84	21.588	21.563	19.092	21.233	19.489	18.449	20.469	20.062	17.271	17.305
415	22.137	21.696	21.525	21.503	19.076	21.282	19.255	18.435	20.551	20.108	17.151	17.347
415.5	21.91	21.429	21.268	21.415	19.059	21.488	18.992	18.544	20.548	20.327	17.085	17.246
416	21.794	21.108	21.055	21.416	19.128	21.743	18.965	18.64	20.553	20.397	17.145	17.057
416.5	21.776	20.973	20.863	21.554	19.277	22.05	19.157	18.809	20.664	20.564	17.247	16.847
417	21.808	20.96	20.626	21.77	19.333	22.172	19.385	18.933	20.583	20.396	17.317	16.856
417.5	21.913	21.292	20.712	21.834	19.421	22.183	19.601	19.092	20.588	20.216	17.343	17.067
418	21.871	21.42	20.811	21.754	19.221	22.04	19.647	19.161	20.512	20.109	17.313	17.281
418.5	21.768	21.351	20.852	21.607	19.041	21.839	19.609	19.1	20.402	20.005	17.336	17.41
419	21.745	21.292	20.946	21.605	19.015	21.741	19.614	19.011	20.382	20.076	17.497	17.391
419.5	21.852	21.239	20.874	21.749	19.099	21.714	19.557	18.876	20.279	20.085	17.658	17.357
420	22.205	21.422	20.949	21.826	19.353	21.994	19.405	18.761	20.257	20.089	17.708	17.461
420.5	22.444	21.528	20.864	21.883	19.541	22.244	19.369	18.696	20.262	20.198	17.639	17.585
421	22.411	21.566	20.708	21.771	19.553	22.281	19.411	18.605	20.274	20.318	17.569	17.704
421.5	22.285	21.565	20.604	21.583	19.412	22.225	19.565	18.637	20.379	20.389	17.533	17.798
422	22.3	21.625	20.711	21.426	19.219	21.994	19.678	18.674	20.341	20.343	17.569	17.712
422.5	22.399	21.66	20.911	21.229	19.113	21.954	19.537	18.74	20.318	20.228	17.627	17.691
423	22.421	21.69	21.056	21.14	18.986	21.988	19.287	18.799	20.194	20.208	17.521	17.602
423.5	22.25	21.609	21.035	21.306	19.057	22.001	19.184	18.833	20.12	20.502	17.419	17.524
424	22.018	21.596	20.93	21.404	19.002	21.859	19.144	18.923	20.111	20.79	17.36	17.51
424.5	21.899	21.604	20.95	21.507	18.852	21.658	19.276	18.994	20.03	20.94	17.416	17.498
425	21.969	21.636	20.936	21.617	18.859	21.511	19.437	19.048	20.097	20.857	17.598	17.473
425.5	22.136	21.693	21.069	21.694	18.805	21.474	19.636	19.165	20.159	20.641	17.628	17.413
426	22.262	21.724	21.175	21.719	18.985	21.747	19.826	19.131	20.255	20.545	17.681	17.384
426.5	22.346	21.871	21.353	21.643	19.201	22.023	19.947	18.99	20.355	20.458	17.628	17.341
427	22.249	21.983	21.503	21.425	19.345	22.16	19.865	18.788	20.198	20.331	17.649	17.376
427.5	22.062	21.965	21.471	21.25	19.349	22.154	19.828	18.732	20.114	20.139	17.724	17.424
428	21.989	21.853	21.402	21.133	19.203	21.986	19.73	18.784	20.117	19.991	17.692	17.47
428.5	22.095	21.75	21.302	21.085	18.992	21.844	19.719	18.834	20.286	19.957	17.663	17.604
429	22.124	21.613	21.207	21.12	18.831	21.795	19.621	18.774	20.382	19.911	17.635	17.639
429.5	22.143	21.685	21.33	21.078	18.848	21.801	19.542	18.683	20.33	19.882	17.602	17.707
430	22.103	21.803	21.5	21.094	18.925	21.896	19.52	18.667	20.217	19.884	17.584	17.747
430.5	22.071	21.738	21.543	20.992	18.97	22.04	19.443	18.727	20.123	19.95	17.645	17.727
431	22.035	21.582	21.367	21.095	19.005	22.055	19.332	18.663	20.163	20.075	17.69	17.765
431.5	22.123	21.382	21.105	21.199	19.022	22.098	19.148	18.585	20.174	20.264	17.698	17.803
432	22.157	21.241	21.028	21.177	19.074	22.099	19.158	18.641	20.167	20.409	17.651	17.884
432.5	22.084	21.259	21.001	21.197	19.123	22.221	19.317	18.756	20.14	20.51	17.576	17.993
433	22.007	21.34	21.023	21.091	19.09	22.348	19.42	18.774	20.11	20.478	17.561	17.984
433.5	21.71	21.312	20.95	21.149	19.062	22.367	19.474	18.737	20.063	20.351	17.573	17.856
434	21.576	21.318	20.889	21.219	19.116	22.321	19.479	18.675	20.124	20.302	17.568	17.742
434.5	21.72	21.372	20.997	21.315	19.296	22.293	19.505	18.707	20.246	20.236	17.542	17.669
435	21.851	21.403	21.003	21.447	19.401	22.309	19.522	18.747	20.351	20.189	17.58	17.681
435.5	21.934	21.422	20.941	21.502	19.34	22.264	19.392	18.657	20.297	20.012	17.701	17.673
436	21.856	21.4	20.783	21.572	19.212	22.108	19.191	18.565	20.083	19.821	17.808	17.631
436.5	21.767	21.324	20.581	21.516	19.159	21.995	19.098	18.466	19.965	19.721	17.897	17.631
437	21.876	21.426	20.58	21.436	19.185	21.999	19.12	18.443	19.992	19.72	17.928	17.614
437.5	21.927	21.478	20.679	21.39	19.217	22.175	19.234	18.454	20.091	19.764	17.894	17.611
438	22.007	21.572	20.859	21.287	19.084	22.352	19.314	18.532	20.178	19.836	17.819	17.562
438.5	21.978	21.617	21.055	21.195	19.068	22.429	19.348	18.635	20.175	19.91	17.659	17.488
439	21.878	21.583	21.215	21.144	19.188	22.441	19.282	18.602	20.082	19.926	17.486	17.468
439.5	21.832	21.605	21.21	21.025	19.39	22.402	19.183	18.604	20.047	20.02	17.355	17.441
440	21.7	21.593	21.212	20.882	19.336	22.335	19.115	18.579	19.958	20.041	17.333	17.476
440.5	21.73	21.545	21.135	20.872	19.144	22.33	19.164	18.519	19.902	20.114	17.405	17.489
441	21.77	21.441	20.972	20.777	18.933	22.362	19.298	18.523	19.919	20.182	17.452	17.502
441.5	21.838	21.375	20.838	20.816	18.857	22.368	19.275	18.392	19.857	20.029	17.499	17.517
442	21.871	21.514	20.818	20.861	19.002	22.269	19.214	18.391	19.87	19.853	17.519	17.47
442.5	21.742	21.718	20.891	20.844	18.997	22.118	19.098	18.413	19.926	19.653	17.491	17.456
443	21.763	21.923	21.074	20.876	18.946	22.026	19.124	18.536	20.028	19.618	17.477	17.448
443.5	21.739	21.977	21.138	20.886	18.935	22.103	19.084	18.683	20.064	19.722	17.477	17.469
444	21.753	21.827	21.032	20.776	18.959	22.197	19.12	18.759	20.115	19.842	17.51	17.526
444.5	21.825	21.678	20.894	20.764	19.04	22.271	19.169	18.816	20.171	19.897	17.552	17.53
445	21.845	21.454	20.853	20.79	19.145	22.359	19.211	18.653	20.1	19.832	17.55	17.532
445.5	21.884	21.4	20.92	20.846	19.215	22.333	19.25	18.517	20.065	19.747	17.478	17.481
446	21.789	21.366	21.004	21.033	19.326	22.385	19.239	18.351	19.996	19.681	17.491	17.481
446.5	21.767	21.471	21.05	21.052	19.319	22.347	19.214	18.307	19.973	19.736	17.579	17.535
447	21.783	21.605	21.024	21.074	19.194	22.31	19.232	18.308	19.991	19.808	17.628	17.574
447.5	21.777	21.607	20.99	21.08	19.181	22.32	19.261	18.359	20.082	19.818	17.654	17.637
448	21.817	21.616	20.947	21.056	19.197	22.372	19.28	18.481	20.155	19.88	17.561	17.584
448.5	21.764	21.549	20.909	20.978	19.284	22.412	19.343	18.544	20.323	19.966	17.518	17.535
449	21.744	21.523	20.904	20.973	19.341	22.413	19.418	18.577	20.339	20.01	17.56	17.494
449.5	21.771	21.497	20.904	21.008	19.219	22.343	19.409	18.489	20.245	19.966	17.6	17.515
450	21.799	21.474	20.97	21.097	19.226	22.181	19.357	18.409	20.115	19.861	17.571	17.531
450.5	21.777	21.487	21.088	21.232	19.256	22.183	19.36	18.365	19.974	19.824	17.474	17.526
451	21.735	21.469	21.136	21.253	19.359	22.211	19.416	18.378	19.891	19.886	17.363	17.505
451.5	21.715	21.535	21.24	21.197	19.319	22.282	19.502	18.38	19.906	19.907	17.359	17.441
452	21.742	21.635	21.275	21.171	19.196	22.352	19.532	18.418	19.938	19.865	17.495	17.51
452.5	21.789	21.677	21.316	21.113	19.015	22.345	19.476	18.445	20.032	19.843	17.583	17.614
453	21.878	21.729	21.365	21.164	18.867	22.367	19.34	18.445	19.988	19.92	17.635	17.721
453.5	21.909	21.652	21.329	21.211	18.878	22.353	19.287	18.428	19.916	20.076	17.602	17.747
454	21.917	21.564	21.25	21.132	18.88	22.234	19.158	18.328	19.815	20.096	17.545	17.701
454.5	21.916	21.531	21.177	21.019	18.985	22.104	19.176	18.381	19.737	20.073	17.556	17.704
455	21.875	21.554	21.139	20.88	19.053	22.037	19.333	18.46	19.825	20.026	17.57	17.768
455.5	21.83	21.634	21.119	20.819	19.124	22.051	19.393	18.506	19.88	20.045	17.594	17.795
456	21.779	21.653	21.087	20.805	19.175	22.159	19.369	18.565	19.884	20.125	17.642	17.732
456.5	21.749	21.652	21.018	20.84	19.269	22.293	19.201	18.5	19.86	20.108	17.67	17.628
457	21.743	21.66	21.045	20.889	19.353	22.351	19.015	18.499	19.732	20.072	17.698	17.563
457.5	21.644	21.7	21.129	20.953	19.368	22.308	19.01	18.496	19.771	19.964	17.659	17.552
458	21.593	21.724	21.244	20.914	19.221	22.229	19.103	18.488	19.839	19.892	17.569	17.527
458.5	21.556	21.668	21.408	20.782	19.091	22.224	19.103	18.464	19.808	19.865	17.506	17.585
459	21.546	21.592	21.526	20.731	19.049	22.313	19.187	18.447	19.886	19.909	17.476	17.607
459.5	21.588	21.546	21.582	20.701	19.064	22.392	19.227	18.385	19.85	19.893	17.483	17.65
460	21.678	21.579	21.534	20.762	19.079	22.377	19.268	18.41	19.823	19.825	17.493	17.665
460.5	21.667	21.475	21.403	20.892	19.027	22.301	19.377	18.413	19.828	19.726	17.548	17.707
461	21.641	21.366	21.296	21.024	19.08	22.232	19.309	18.483	19.822	19.738	17.644	17.797
461.5	21.529	21.323	21.157	21.151	19.189	22.193	19.193	18.523	19.835	19.803	17.768	17.856
462	21.449	21.282	21.044	21.253	19.358	22.296	19.041	18.494	19.8	19.801	17.766	17.799
462.5	21.402	21.284	20.931	21.23	19.412	22.402	18.91	18.455	19.748	19.791	17.707	17.666
463	21.471	21.133	20.93	21.261	19.391	22.545	18.904	18.346	19.651	19.769	17.578	17.522
463.5	21.566	21.105	21.041	21.3	19.278	22.505	18.948	18.254	19.587	19.842	17.415	17.43
464	21.676	21.198	21.141	21.248	19.127	22.294	18.901	18.152	19.489	19.949	17.348	17.497
464.5	21.644	21.349	21.165	21.118	19.045	22.166	18.9	18.116	19.429	19.948	17.315	17.557
465	21.518	21.555	21.196	20.945	19.025	22.055	18.911	18.148	19.393	19.933	17.463	17.632
465.5	21.388	21.635	21.147	20.891	19.069	22.137	19.084	18.251	19.51	19.918	17.612	17.698
466	21.299	21.628	21.066	21.006	19.075	22.251	19.213	18.308	19.619	19.947	17.715	17.732
466.5	21.322	21.588	20.921	21.081	18.932	22.211	19.221	18.289	19.783	20.016	17.69	17.777
467	21.379	21.495	20.881	21.068	18.822	22.089	19.131	18.255	19.864	19.989	17.602	17.747
467.5	21.435	21.455	20.947	20.939	18.77	21.98	18.986	18.203	19.829	19.908	17.509	17.706
468	21.57	21.405	21.076	20.819	18.861	21.953	18.958	18.213	19.792	19.795	17.368	17.683
468.5	21.528	21.335	21.201	20.79	19.035	22.049	18.887	18.208	19.736	19.757	17.294	17.688
469	21.472	21.266	21.236	20.82	19.125	22.179	18.904	18.27	19.752	19.8	17.353	17.665
469.5	21.424	21.393	21.367	20.87	19.176	22.2	18.89	18.369	19.792	19.802	17.523	17.62
470	21.415	21.584	21.424	21.039	19.124	22.285	18.928	18.477	19.763	19.858	17.665	17.647
470.5	21.477	21.675	21.457	21.088	19.009	22.357	18.968	18.54	19.68	19.83	17.677	17.69
471	21.57	21.627	21.422	21.102	18.975	22.356	18.932	18.433	19.637	19.802	17.608	17.778
471.5	21.64	21.482	21.313	21.072	19.073	22.459	18.928	18.254	19.559	19.844	17.568	17.844
472	21.731	21.396	21.229	20.941	19.227	22.418	18.843	17.988	19.499	19.801	17.601	17.907
472.5	21.813	21.407	21.208	20.821	19.205	22.361	18.862	17.933	19.566	19.858	17.614	17.89
473	21.84	21.399	21.198	20.741	19.051	22.416	18.887	18.044	19.643	19.906	17.595	17.815
473.5	21.854	21.472	21.26	20.728	18.917	22.429	18.89	18.132	19.706	19.948	17.58	17.696
474	21.787	21.566	21.281	20.843	18.949	22.469	18.951	18.203	19.731	20.006	17.591	17.584
474.5	21.691	21.604	21.215	20.911	19.024	22.395	18.919	18.181	19.587	19.978	17.607	17.604
475	21.576	21.537	21.228	20.957	19.134	22.275	18.932	18.18	19.488	19.975	17.595	17.595
475.5	21.507	21.507	21.292	21.07	19.173	22.197	18.968	18.242	19.469	19.945	17.58	17.626
476	21.409	21.522	21.347	21.2	19.17	22.269	18.896	18.209	19.463	19.849	17.571	17.655
476.5	21.305	21.617	21.389	21.248	19.101	22.294	18.906	18.167	19.566	19.786	17.612	17.622
477	21.261	21.651	21.355	21.152	19.02	22.319	18.9	18.13	19.676	19.77	17.648	17.623
477.5	21.234	21.624	21.331	21.052	18.939	22.337	18.927	18.097	19.677	19.797	17.602	17.581
478	21.27	21.598	21.316	21.048	18.94	22.337	18.977	18.136	19.661	19.771	17.503	17.574
478.5	21.32	21.551	21.353	21.099	19.005	22.331	19.007	18.164	19.58	19.633	17.473	17.668
479	21.374	21.534	21.337	21.124	18.985	22.335	19.017	18.213	19.566	19.551	17.507	17.791
479.5	21.513	21.522	21.339	21.088	18.95	22.393	19.002	18.214	19.573	19.59	17.606	17.89
480	21.575	21.574	21.316	21.105	18.93	22.447	19.002	18.235	19.601	19.779	17.63	17.856
480.5	21.585	21.587	21.321	21.141	18.879	22.496	19.004	18.298	19.61	19.912	17.532	17.753
481	21.556	21.595	21.344	21.106	18.888	22.549	18.99	18.29	19.625	19.962	17.476	17.671
481.5	21.448	21.581	21.387	21.071	18.892	22.602	18.937	18.237	19.615	19.927	17.46	17.665
482	21.328	21.547	21.402	21.023	18.909	22.607	18.826	18.126	19.604	19.897	17.494	17.705
482.5	21.21	21.548	21.354	21.061	18.899	22.56	18.733	18.014	19.575	19.868	17.516	17.76
483	21.177	21.546	21.27	21.108	18.947	22.409	18.766	17.999	19.583	19.88	17.547	17.789
483.5	21.245	21.623	21.277	21.062	18.982	22.341	18.854	17.996	19.671	19.899	17.597	17.817
484	21.404	21.706	21.286	21.016	19.016	22.353	18.977	18.025	19.774	19.933	17.631	17.805
484.5	21.438	21.77	21.346	20.965	19.088	22.374	19	18.018	19.805	19.937	17.597	17.767
485	21.452	21.734	21.381	20.956	19.083	22.436	18.964	17.997	19.774	19.902	17.516	17.731
485.5	21.429	21.651	21.358	20.997	19.151	22.561	18.861	17.947	19.674	19.839	17.455	17.705
486	21.374	21.618	21.356	21.046	19.221	22.692	18.801	17.996	19.641	19.778	17.487	17.755
486.5	21.347	21.601	21.32	21.124	19.255	22.786	18.725	18.091	19.666	19.737	17.528	17.788
487	21.272	21.608	21.353	21.156	19.283	22.803	18.703	18.202	19.66	19.748	17.602	17.809
487.5	21.241	21.58	21.444	21.066	19.218	22.763	18.718	18.239	19.661	19.779	17.651	17.754
488	21.29	21.638	21.592	21.028	19.241	22.809	18.772	18.237	19.652	19.833	17.693	17.729
488.5	21.344	21.683	21.685	21.077	19.35	22.955	18.823	18.148	19.604	19.834	17.665	17.75
489	21.361	21.766	21.738	21.201	19.453	23.003	18.888	18.139	19.613	19.815	17.596	17.802
489.5	21.352	21.76	21.789	21.348	19.541	23.006	18.935	18.176	19.584	19.842	17.558	17.852
490	21.329	21.644	21.791	21.442	19.482	22.97	18.975	18.229	19.592	19.857	17.575	17.853
490.5	21.419	21.524	21.788	21.453	19.424	22.993	18.963	18.267	19.573	19.887	17.563	17.81
491	21.457	21.399	21.694	21.501	19.375	23.079	18.947	18.24	19.585	19.951	17.535	17.772
491.5	21.519	21.355	21.662	21.504	19.371	23.072	18.925	18.209	19.626	20.009	17.474	17.764
492	21.522	21.416	21.676	21.507	19.437	23.008	18.99	18.195	19.719	20.085	17.444	17.778
492.5	21.504	21.502	21.718	21.558	19.548	22.94	19.018	18.225	19.841	20.144	17.472	17.876
493	21.503	21.647	21.741	21.568	19.67	22.887	19.056	18.281	19.895	20.202	17.514	17.965
493.5	21.455	21.753	21.761	21.592	19.732	22.994	19.049	18.322	19.901	20.264	17.587	18.076
494	21.465	21.838	21.776	21.539	19.721	23.17	18.961	18.32	19.842	20.245	17.681	18.12
494.5	21.495	21.87	21.816	21.461	19.651	23.327	18.918	18.291	19.771	20.152	17.775	18.102
495	21.502	21.839	21.773	21.432	19.571	23.425	18.866	18.287	19.71	20.018	17.823	18.064
495.5	21.456	21.781	21.713	21.513	19.551	23.369	18.896	18.331	19.686	19.973	17.824	18.017
496	21.389	21.712	21.662	21.666	19.625	23.363	18.959	18.357	19.748	20.036	17.774	18.028
496.5	21.373	21.717	21.646	21.799	19.728	23.334	18.957	18.364	19.853	20.134	17.731	18.067
497	21.421	21.829	21.704	21.914	19.812	23.362	18.962	18.335	19.981	20.262	17.758	18.152
497.5	21.504	21.943	21.792	21.959	19.828	23.406	18.992	18.348	20.038	20.386	17.797	18.22
498	21.544	21.996	21.866	22.084	19.855	23.454	19.056	18.401	20.065	20.481	17.878	18.274
498.5	21.55	21.924	21.964	22.172	19.869	23.55	19.156	18.475	20.112	20.612	17.921	18.266
499	21.48	21.831	22	22.28	19.853	23.612	19.18	18.512	20.158	20.649	17.962	18.255
499.5	21.392	21.82	22.112	22.385	19.816	23.683	19.16	18.542	20.207	20.656	18.001	18.256
500	21.402	21.888	22.264	22.429	19.82	23.709	19.167	18.555	20.175	20.613	18.088	18.257
500.5	21.452	21.97	22.402	22.459	19.889	23.733	19.205	18.557	20.128	20.585	18.154	18.255
501	21.542	21.988	22.483	22.508	20	23.754	19.265	18.537	20.02	20.634	18.161	18.26
501.5	21.602	21.963	22.456	22.603	20.112	23.758	19.311	18.551	20.03	20.778	18.069	18.297
502	21.617	21.954	22.439	22.79	20.173	23.799	19.32	18.595	20.104	20.924	17.978	18.334
502.5	21.651	22.019	22.445	23.012	20.238	23.83	19.301	18.674	20.184	20.995	17.946	18.358
503	21.654	22.045	22.473	23.193	20.345	23.911	19.312	18.769	20.291	21.057	17.972	18.385
503.5	21.653	22.106	22.505	23.31	20.458	24.062	19.305	18.786	20.295	21.092	18.051	18.434
504	21.638	22.153	22.634	23.416	20.696	24.286	19.363	18.798	20.342	21.163	18.155	18.516
504.5	21.655	22.167	22.769	23.509	20.875	24.438	19.432	18.834	20.417	21.333	18.224	18.537
505	21.735	22.221	22.934	23.669	21.023	24.558	19.51	18.867	20.431	21.504	18.297	18.521
505.5	21.849	22.215	23.043	23.862	21.07	24.633	19.551	18.898	20.485	21.657	18.296	18.542
506	21.889	22.254	23.122	24.06	21.074	24.763	19.573	18.914	20.484	21.767	18.293	18.568
506.5	21.962	22.292	23.236	24.232	21.106	24.956	19.581	18.921	20.49	21.797	18.299	18.644
507	21.94	22.316	23.268	24.402	21.219	25.068	19.6	18.968	20.494	21.871	18.279	18.723
507.5	21.976	22.348	23.314	24.509	21.32	25.157	19.621	19.026	20.475	21.917	18.345	18.8
508	21.947	22.389	23.354	24.659	21.412	25.276	19.607	19.067	20.523	21.969	18.414	18.902
508.5	21.925	22.481	23.421	24.822	21.555	25.517	19.594	19.168	20.669	22.031	18.454	18.982
509	21.978	22.519	23.512	25.012	21.635	25.698	19.595	19.286	20.845	22.155	18.492	19.041
509.5	22.11	22.655	23.648	25.231	21.724	25.789	19.667	19.369	20.946	22.366	18.482	19.07
510	22.192	22.739	23.773	25.355	21.747	25.777	19.783	19.467	21.032	22.589	18.485	19.093
510.5	22.202	22.864	23.93	25.513	21.789	25.86	19.907	19.532	21.049	22.785	18.488	19.13
511	22.16	22.963	24.019	25.647	21.974	26.083	19.987	19.589	21.123	22.958	18.524	19.248
511.5	22.172	23.01	24.104	25.918	22.261	26.322	20.051	19.609	21.224	23.154	18.611	19.358
512	22.278	23.139	24.221	26.161	22.542	26.54	20.11	19.593	21.331	23.409	18.734	19.424
512.5	22.441	23.218	24.402	26.344	22.677	26.656	20.235	19.619	21.425	23.605	18.866	19.442
513	22.576	23.226	24.629	26.579	22.766	26.727	20.398	19.724	21.526	23.767	18.984	19.452
513.5	22.64	23.187	24.808	26.846	22.889	26.83	20.54	19.845	21.64	23.882	19.117	19.512
514	22.692	23.165	24.868	27.213	23.069	26.931	20.606	20	21.783	24.061	19.216	19.614
514.5	22.778	23.284	24.934	27.564	23.298	27.09	20.639	20.123	21.975	24.272	19.317	19.726
515	22.951	23.496	25.036	27.917	23.479	27.241	20.686	20.273	22.09	24.458	19.414	19.823
515.5	23.102	23.691	25.223	28.288	23.662	27.418	20.741	20.429	22.162	24.597	19.467	19.904
516	23.247	23.776	25.438	28.572	23.814	27.587	20.847	20.551	22.174	24.735	19.525	19.99
516.5	23.327	23.83	25.578	28.736	23.915	27.708	20.968	20.658	22.218	24.965	19.605	20.109
517	23.465	23.862	25.735	28.898	24.067	27.847	21.177	20.7	22.392	25.196	19.712	20.269
517.5	23.616	23.92	25.802	29.122	24.272	28.051	21.329	20.755	22.54	25.426	19.874	20.407
518	23.708	23.985	25.901	29.44	24.451	28.355	21.445	20.865	22.688	25.591	20.003	20.528
518.5	23.729	23.976	25.957	29.786	24.6	28.63	21.463	21.015	22.779	25.723	20.065	20.596
519	23.71	24.019	26.039	30.126	24.744	28.824	21.502	21.256	22.954	25.958	20.06	20.654
519.5	23.687	24.066	26.118	30.468	24.892	28.897	21.576	21.474	23.153	26.168	20.029	20.688
520	23.798	24.184	26.19	30.745	25.103	29.003	21.733	21.602	23.329	26.396	20.087	20.71
520.5	24.028	24.327	26.343	30.989	25.257	29.139	21.889	21.696	23.452	26.606	20.256	20.773
521	24.214	24.454	26.483	31.227	25.496	29.377	22.058	21.816	23.542	26.847	20.425	20.893
521.5	24.459	24.631	26.715	31.534	25.758	29.647	22.145	21.965	23.587	27.093	20.572	21.065
522	24.611	24.817	26.931	31.803	25.913	29.9	22.241	22.183	23.662	27.42	20.655	21.213
522.5	24.757	25.004	27.083	32.058	25.978	30.046	22.363	22.376	23.806	27.733	20.744	21.383
523	24.889	25.171	27.209	32.277	26.028	30.134	22.521	22.531	24.049	28.022	20.839	21.483
523.5	24.933	25.18	27.338	32.541	26.179	30.205	22.65	22.615	24.271	28.204	20.985	21.581
524	24.996	25.197	27.529	32.882	26.375	30.312	22.759	22.648	24.369	28.365	21.074	21.642
524.5	25.1	25.229	27.684	33.205	26.6	30.403	22.87	22.729	24.453	28.558	21.136	21.707
525	25.258	25.303	27.735	33.562	26.808	30.538	22.997	22.867	24.568	28.804	21.217	21.823
525.5	25.406	25.409	27.725	33.861	27.046	30.664	23.166	22.993	24.718	29.096	21.282	21.911
526	25.481	25.454	27.777	34.121	27.254	30.924	23.254	23.104	24.87	29.264	21.424	21.988
526.5	25.56	25.487	27.879	34.333	27.342	31.16	23.346	23.232	24.987	29.394	21.572	22.07
527	25.668	25.536	27.99	34.447	27.45	31.336	23.455	23.447	25.114	29.468	21.694	22.154
527.5	25.829	25.599	28.098	34.647	27.589	31.406	23.646	23.655	25.283	29.562	21.776	22.235
528	26.012	25.691	28.18	34.848	27.734	31.417	23.824	23.741	25.387	29.693	21.813	22.308
528.5	26.138	25.761	28.286	35.018	27.823	31.431	23.955	23.765	25.434	29.821	21.859	22.323
529	26.167	25.818	28.399	35.222	27.895	31.491	24.007	23.827	25.47	29.948	21.985	22.391
529.5	26.164	25.823	28.524	35.41	28.059	31.538	24.004	23.948	25.559	30.03	22.103	22.424
530	26.17	25.861	28.609	35.625	28.268	31.643	24.046	24.107	25.715	30.146	22.133	22.472
530.5	26.229	25.938	28.682	35.815	28.391	31.676	24.076	24.221	25.853	30.276	22.167	22.523
531	26.336	26.074	28.769	35.957	28.421	31.737	24.228	24.346	25.877	30.499	22.209	22.587
531.5	26.433	26.206	28.863	36.159	28.367	31.737	24.369	24.504	25.908	30.733	22.34	22.683
532	26.566	26.254	28.971	36.305	28.341	31.795	24.549	24.651	26.021	30.923	22.364	22.727
532.5	26.7	26.275	29.123	36.292	28.385	31.966	24.689	24.787	26.16	31.079	22.35	22.786
533	26.737	26.361	29.252	36.255	28.548	32.122	24.833	24.849	26.296	31.184	22.3	22.832
533.5	26.698	26.426	29.289	36.251	28.715	32.271	24.928	24.9	26.372	31.247	22.29	22.885
534	26.719	26.519	29.23	36.38	28.821	32.351	24.896	24.913	26.442	31.271	22.334	22.929
534.5	26.826	26.532	29.156	36.568	28.876	32.362	24.842	24.949	26.527	31.333	22.396	22.967
535	27.032	26.589	29.151	36.816	28.978	32.335	24.832	25	26.642	31.449	22.471	23.011
535.5	27.153	26.682	29.209	37.021	29.079	32.355	24.926	25.023	26.767	31.578	22.619	23.068
536	27.113	26.698	29.219	37.244	29.043	32.346	25.076	25.011	26.844	31.641	22.7	23.031
536.5	27.087	26.726	29.24	37.37	28.926	32.411	25.239	25.023	26.868	31.691	22.77	23.028
537	27.166	26.752	29.314	37.401	28.945	32.479	25.362	25.132	26.932	31.765	22.742	23.065
537.5	27.273	26.854	29.402	37.358	29.001	32.54	25.452	25.328	27.027	31.943	22.741	23.14
538	27.316	26.881	29.526	37.281	29.09	32.616	25.463	25.438	27.154	32.054	22.751	23.187
538.5	27.24	26.826	29.575	37.23	29.153	32.588	25.436	25.438	27.17	32.147	22.794	23.188
539	27.215	26.791	29.572	37.298	29.196	32.537	25.378	25.377	27.139	32.185	22.859	23.191
539.5	27.185	26.796	29.478	37.363	29.274	32.536	25.355	25.341	27.198	32.293	22.912	23.209
540	27.251	26.956	29.46	37.453	29.27	32.626	25.411	25.41	27.318	32.421	22.969	23.242
540.5	27.301	27.056	29.51	37.563	29.331	32.691	25.494	25.409	27.37	32.399	22.971	23.266
541	27.328	27.05	29.612	37.651	29.392	32.697	25.543	25.384	27.263	32.339	22.937	23.258
541.5	27.432	27.099	29.719	37.682	29.463	32.62	25.565	25.359	27.142	32.272	22.887	23.247
542	27.445	27.078	29.743	37.694	29.431	32.61	25.57	25.422	27.159	32.324	22.873	23.223
542.5	27.499	27.107	29.749	37.704	29.434	32.662	25.578	25.503	27.247	32.444	22.849	23.169
543	27.532	27.056	29.711	37.773	29.425	32.753	25.629	25.571	27.295	32.552	22.809	23.106
543.5	27.526	26.986	29.667	37.874	29.53	32.871	25.624	25.571	27.276	32.66	22.817	23.102
544	27.54	26.963	29.695	37.904	29.663	32.868	25.669	25.535	27.197	32.724	22.88	23.243
544.5	27.499	26.934	29.717	37.861	29.749	32.844	25.663	25.49	27.148	32.676	22.967	23.397
545	27.491	26.958	29.771	37.875	29.822	32.765	25.693	25.481	27.13	32.635	23.029	23.439
545.5	27.489	26.999	29.832	37.959	29.789	32.706	25.725	25.557	27.186	32.63	23.073	23.384
546	27.539	27.069	29.879	38.129	29.705	32.699	25.753	25.708	27.315	32.689	23.157	23.351
546.5	27.621	27.141	29.971	38.293	29.645	32.735	25.765	25.849	27.465	32.805	23.2	23.394
547	27.621	27.222	29.984	38.31	29.608	32.912	25.847	25.952	27.548	32.929	23.182	23.461
547.5	27.613	27.255	30.004	38.329	29.71	33.127	25.944	25.967	27.591	32.959	23.144	23.469
548	27.594	27.24	29.988	38.263	29.809	33.237	26.015	25.903	27.544	32.965	23.122	23.45
548.5	27.635	27.213	29.929	38.246	29.82	33.212	26	25.841	27.491	32.886	23.165	23.485
549	27.691	27.253	29.92	38.212	29.744	33.12	25.974	25.82	27.501	32.944	23.206	23.513
549.5	27.669	27.346	29.943	38.258	29.679	33.064	25.98	25.89	27.526	33.021	23.224	23.557
550	27.682	27.388	30.005	38.285	29.672	33.012	26.019	25.978	27.62	33.053	23.267	23.549
550.5	27.753	27.39	30.057	38.261	29.668	32.959	26.075	26.007	27.608	33.07	23.261	23.546
551	27.807	27.417	30.018	38.219	29.643	32.912	26.055	26.015	27.606	33.016	23.237	23.554
551.5	27.756	27.402	29.976	38.244	29.656	33.002	26.148	26.036	27.626	33.106	23.235	23.596
552	27.667	27.386	29.925	38.344	29.718	33.127	26.175	26.081	27.682	33.205	23.241	23.624
552.5	27.614	27.305	29.903	38.488	29.824	33.203	26.184	26.168	27.721	33.323	23.304	23.642
553	27.595	27.249	29.863	38.583	29.89	33.149	26.171	26.191	27.719	33.408	23.327	23.638
553.5	27.599	27.237	29.921	38.583	29.883	33.007	26.122	26.141	27.738	33.365	23.289	23.62
554	27.601	27.288	29.996	38.581	29.87	32.901	26.141	26.049	27.718	33.268	23.221	23.574
554.5	27.645	27.27	30.082	38.521	29.797	32.889	26.096	25.897	27.653	33.124	23.146	23.475
555	27.639	27.269	30.079	38.51	29.795	32.949	26.124	25.856	27.637	33.1	23.172	23.434
555.5	27.563	27.178	29.995	38.427	29.733	32.987	26.145	25.833	27.632	33.097	23.22	23.47
556	27.517	27.115	29.955	38.384	29.753	33.036	26.208	25.862	27.651	33.193	23.293	23.536
556.5	27.493	27.095	29.97	38.301	29.85	33.134	26.204	25.759	27.55	33.209	23.291	23.583
557	27.49	27.132	30.007	38.358	29.957	33.175	26.174	25.633	27.455	33.081	23.277	23.588
557.5	27.474	27.197	30.002	38.366	30.03	33.102	26.06	25.485	27.431	32.873	23.279	23.577
558	27.459	27.176	29.961	38.345	29.959	32.933	25.911	25.472	27.474	32.65	23.255	23.562
558.5	27.467	27.059	29.946	38.23	29.847	32.801	25.712	25.5	27.48	32.605	23.214	23.521
559	27.431	26.98	29.999	38.133	29.714	32.746	25.66	25.545	27.472	32.634	23.179	23.53
559.5	27.434	27.021	30.146	38.061	29.652	32.775	25.727	25.557	27.5	32.756	23.13	23.535
560	27.357	27.098	30.165	37.972	29.643	32.792	25.814	25.516	27.489	32.787	23.05	23.511
560.5	27.347	27.096	30.031	37.925	29.663	32.738	25.826	25.436	27.469	32.845	22.977	23.429
561	27.324	27.046	29.874	37.948	29.681	32.71	25.8	25.309	27.364	32.805	22.93	23.377
561.5	27.252	26.967	29.764	37.969	29.66	32.654	25.777	25.275	27.298	32.726	22.946	23.381
562	27.185	26.899	29.775	37.946	29.542	32.646	25.737	25.261	27.235	32.615	22.985	23.364
562.5	27.092	26.81	29.743	37.832	29.337	32.586	25.676	25.232	27.195	32.525	22.944	23.328
563	27.014	26.734	29.611	37.617	29.139	32.551	25.583	25.053	27.095	32.393	22.879	23.219
563.5	27.019	26.678	29.522	37.365	29.067	32.479	25.429	24.878	27.037	32.268	22.759	23.137
564	26.992	26.627	29.452	37.081	29.062	32.395	25.351	24.791	26.955	32.173	22.745	23.074
564.5	26.939	26.566	29.426	37.011	29.047	32.385	25.244	24.768	26.836	32.097	22.758	23.109
565	26.913	26.548	29.375	37.003	28.978	32.34	25.277	24.816	26.779	32.091	22.776	23.128
565.5	26.826	26.493	29.281	37.023	28.995	32.339	25.269	24.717	26.755	32.016	22.744	23.143
566	26.713	26.379	29.191	36.966	29.045	32.204	25.19	24.596	26.723	31.914	22.663	23.064
566.5	26.566	26.307	29.114	36.858	29.032	32.073	25.045	24.489	26.66	31.75	22.586	22.981
567	26.372	26.271	29.054	36.762	28.86	31.971	24.889	24.414	26.533	31.529	22.474	22.9
567.5	26.21	26.323	28.998	36.618	28.675	31.885	24.772	24.432	26.46	31.393	22.406	22.834
568	26.061	26.283	28.95	36.482	28.559	31.773	24.684	24.402	26.397	31.258	22.329	22.791
568.5	25.972	26.183	29	36.334	28.489	31.67	24.659	24.305	26.324	31.203	22.296	22.759
569	26.023	26.106	29.026	36.076	28.326	31.576	24.56	24.153	26.191	31.022	22.252	22.753
569.5	26.061	26.075	28.909	35.867	28.165	31.581	24.439	23.894	26.023	30.776	22.238	22.724
570	25.997	26.064	28.792	35.578	28.056	31.558	24.271	23.76	25.874	30.543	22.165	22.637
570.5	25.821	26.03	28.695	35.407	28.032	31.508	24.196	23.694	25.817	30.436	22.079	22.509
571	25.658	25.987	28.665	35.342	27.988	31.423	24.1	23.653	25.771	30.35	21.963	22.402
571.5	25.557	25.9	28.55	35.277	27.882	31.346	24.035	23.55	25.78	30.255	21.896	22.397
572	25.496	25.842	28.413	35.174	27.747	31.238	23.944	23.417	25.734	30.097	21.86	22.439
572.5	25.44	25.818	28.379	34.999	27.611	31.031	23.893	23.377	25.712	29.993	21.803	22.425
573	25.423	25.809	28.394	34.727	27.479	30.793	23.86	23.342	25.66	29.928	21.742	22.333
573.5	25.433	25.837	28.391	34.513	27.366	30.709	23.774	23.313	25.556	29.944	21.667	22.218
574	25.343	25.78	28.29	34.308	27.315	30.765	23.6	23.225	25.412	29.918	21.662	22.176
574.5	25.217	25.745	28.194	34.192	27.248	30.876	23.483	23.107	25.284	29.842	21.608	22.176
575	25.041	25.67	28.081	34.164	27.252	30.812	23.416	22.974	25.24	29.777	21.57	22.204
575.5	24.96	25.599	28.001	34.107	27.209	30.661	23.47	22.824	25.218	29.588	21.528	22.269
576	24.899	25.579	27.955	33.981	27.154	30.464	23.462	22.735	25.163	29.448	21.525	22.235
576.5	24.828	25.536	27.981	33.874	27.09	30.342	23.402	22.7	25.069	29.261	21.538	22.147
577	24.763	25.497	27.989	33.79	27.047	30.302	23.306	22.725	25.04	29.19	21.476	21.995
577.5	24.706	25.443	27.889	33.768	27.063	30.262	23.218	22.725	25.081	29.145	21.418	21.869
578	24.707	25.483	27.795	33.739	27.05	30.255	23.146	22.673	25.084	29.051	21.368	21.835
578.5	24.821	25.598	27.768	33.692	27.033	30.241	23.047	22.616	25.038	28.885	21.284	21.809
579	24.904	25.622	27.746	33.632	26.942	30.242	22.976	22.527	24.959	28.754	21.219	21.821
579.5	24.855	25.529	27.656	33.486	26.835	30.223	22.896	22.391	24.865	28.713	21.179	21.806
580	24.695	25.367	27.541	33.308	26.723	30.164	22.822	22.24	24.804	28.638	21.202	21.775
580.5	24.463	25.335	27.479	33.175	26.661	30.132	22.745	22.109	24.769	28.558	21.235	21.735
581	24.377	25.362	27.521	33.032	26.55	30.073	22.701	22.08	24.77	28.441	21.189	21.69
581.5	24.294	25.358	27.524	32.856	26.486	29.991	22.718	22.112	24.712	28.351	21.115	21.671
582	24.251	25.359	27.504	32.603	26.397	29.857	22.752	22.076	24.665	28.28	21.068	21.651
582.5	24.172	25.33	27.405	32.347	26.355	29.775	22.729	22.045	24.584	28.2	21.04	21.636
583	24.087	25.286	27.283	32.302	26.297	29.759	22.686	22.022	24.645	28.144	21.049	21.641
583.5	24	25.207	27.135	32.341	26.311	29.769	22.618	22.022	24.621	28.135	21.012	21.664
584	23.92	25.125	27.09	32.387	26.427	29.701	22.609	22.03	24.568	28.113	20.99	21.706
584.5	23.956	25.128	27.133	32.334	26.414	29.59	22.567	21.985	24.505	28.108	20.964	21.691
585	23.961	25.133	27.211	32.255	26.33	29.501	22.514	21.976	24.504	28.055	20.934	21.657
585.5	23.98	25.114	27.322	32.229	26.123	29.506	22.46	21.918	24.526	28.059	20.877	21.591
586	23.975	25.062	27.348	32.258	26.048	29.497	22.416	21.856	24.5	28.032	20.875	21.561
586.5	23.941	25.02	27.261	32.161	26.074	29.465	22.394	21.828	24.428	28.014	20.881	21.513
587	23.888	24.979	27.117	32.031	26.137	29.408	22.346	21.834	24.431	27.932	20.929	21.558
587.5	23.786	24.901	26.941	31.957	26.155	29.369	22.302	21.862	24.484	27.861	20.856	21.539
588	23.745	24.884	26.864	31.901	26.106	29.423	22.278	21.811	24.529	27.771	20.78	21.478
588.5	23.71	24.836	26.837	31.861	26.047	29.434	22.306	21.736	24.497	27.677	20.694	21.354
589	23.681	24.805	26.803	31.737	26.056	29.414	22.334	21.695	24.51	27.617	20.673	21.248
589.5	23.629	24.734	26.715	31.556	26.037	29.317	22.274	21.659	24.494	27.614	20.703	21.22
590	23.576	24.71	26.604	31.435	25.971	29.212	22.197	21.655	24.441	27.63	20.713	21.209
590.5	23.582	24.746	26.546	31.337	25.79	29.179	22.134	21.607	24.336	27.608	20.732	21.252
591	23.601	24.766	26.611	31.354	25.693	29.211	22.167	21.555	24.333	27.534	20.728	21.284
591.5	23.682	24.755	26.724	31.354	25.672	29.299	22.193	21.529	24.398	27.503	20.728	21.265
592	23.75	24.746	26.732	31.385	25.723	29.375	22.194	21.542	24.43	27.527	20.743	21.207
592.5	23.674	24.764	26.628	31.324	25.767	29.365	22.145	21.545	24.347	27.534	20.743	21.203
593	23.536	24.813	26.493	31.206	25.689	29.276	22.087	21.54	24.328	27.476	20.696	21.259
593.5	23.423	24.851	26.391	31.041	25.623	29.207	22.088	21.573	24.399	27.366	20.623	21.284
594	23.462	24.887	26.429	30.911	25.56	29.221	22.074	21.585	24.565	27.269	20.551	21.221
594.5	23.508	24.876	26.478	30.899	25.613	29.256	22.043	21.633	24.608	27.235	20.517	21.174
595	23.522	24.865	26.567	30.918	25.631	29.191	21.999	21.587	24.53	27.236	20.532	21.19
595.5	23.466	24.805	26.64	30.907	25.637	29.152	22.064	21.528	24.404	27.262	20.595	21.233
596	23.452	24.75	26.665	30.915	25.635	29.026	22.151	21.441	24.266	27.219	20.623	21.203
596.5	23.438	24.748	26.625	30.847	25.592	28.966	22.262	21.372	24.2	27.169	20.629	21.14
597	23.418	24.794	26.579	30.846	25.585	28.905	22.258	21.324	24.158	27.106	20.564	21.067
597.5	23.438	24.825	26.544	30.866	25.547	28.938	22.216	21.243	24.178	27.036	20.492	21.077
598	23.425	24.782	26.517	30.857	25.572	29.036	22.16	21.205	24.273	27.018	20.454	21.122
598.5	23.415	24.725	26.437	30.844	25.588	29.073	22.058	21.168	24.268	27.001	20.478	21.176
599	23.314	24.67	26.384	30.84	25.638	29.031	21.978	21.146	24.269	27.005	20.488	21.205
599.5	23.255	24.69	26.404	30.871	25.767	29.014	21.902	21.125	24.291	26.967	20.478	21.18
600	23.256	24.73	26.46	30.842	25.871	28.894	21.869	21.067	24.322	26.848	20.427	21.177
600.5	23.205	24.749	26.456	30.636	25.849	28.783	21.864	21.057	24.302	26.784	20.437	21.156
601	23.159	24.729	26.404	30.477	25.72	28.705	21.856	21.062	24.233	26.713	20.484	21.144
601.5	23.12	24.678	26.356	30.371	25.606	28.732	21.835	21.094	24.248	26.718	20.491	21.121
602	23.101	24.643	26.331	30.372	25.536	28.782	21.83	21.14	24.348	26.742	20.462	21.072
602.5	23.144	24.612	26.323	30.356	25.462	28.764	21.86	21.137	24.386	26.794	20.478	21.072
603	23.168	24.502	26.312	30.345	25.403	28.784	21.854	21.095	24.32	26.815	20.483	21.056
603.5	23.248	24.438	26.319	30.312	25.399	28.823	21.846	21.052	24.213	26.776	20.521	21.083
604	23.261	24.484	26.327	30.242	25.432	28.846	21.824	21.022	24.135	26.736	20.501	21.065
604.5	23.178	24.589	26.284	30.177	25.384	28.801	21.812	21.041	24.137	26.697	20.465	20.983
605	23.038	24.672	26.204	30.11	25.306	28.734	21.797	21.058	24.125	26.628	20.388	20.941
605.5	23.05	24.694	26.126	30.038	25.209	28.675	21.715	21.029	24.074	26.469	20.363	20.89
606	23.098	24.643	26.094	29.976	25.197	28.601	21.643	21.008	24.065	26.373	20.373	20.9
606.5	23.06	24.603	26.054	29.899	25.111	28.504	21.634	21.012	24.135	26.343	20.392	20.827
607	22.927	24.511	25.991	29.852	25.05	28.436	21.653	20.986	24.253	26.342	20.384	20.771
607.5	22.786	24.447	25.926	29.789	24.995	28.488	21.727	20.938	24.198	26.322	20.301	20.769
608	22.801	24.439	25.885	29.831	25.038	28.522	21.699	20.811	24.073	26.278	20.276	20.81
608.5	22.812	24.44	25.906	29.847	25.047	28.565	21.6	20.751	23.913	26.228	20.227	20.885
609	22.846	24.472	25.877	29.769	25.028	28.502	21.527	20.726	23.832	26.129	20.192	20.821
609.5	22.85	24.494	25.846	29.615	24.943	28.46	21.448	20.712	23.816	25.998	20.184	20.749
610	22.834	24.506	25.837	29.477	24.93	28.421	21.419	20.648	23.859	25.921	20.16	20.675
610.5	22.788	24.517	25.846	29.401	24.875	28.362	21.366	20.57	23.941	25.851	20.107	20.617
611	22.719	24.471	25.819	29.346	24.763	28.27	21.3	20.539	23.95	25.807	20.021	20.554
611.5	22.81	24.341	25.745	29.214	24.694	28.179	21.288	20.535	23.867	25.82	19.969	20.504
612	22.843	24.24	25.642	29.06	24.617	28.076	21.28	20.53	23.712	25.811	20.034	20.496
612.5	22.737	24.172	25.546	28.888	24.636	27.996	21.292	20.456	23.643	25.729	20.088	20.506
613	22.522	24.162	25.534	28.845	24.608	27.944	21.313	20.432	23.605	25.643	20.061	20.491
613.5	22.403	24.111	25.545	28.831	24.592	27.909	21.296	20.383	23.607	25.564	19.957	20.472
614	22.419	24.077	25.571	28.802	24.542	27.78	21.286	20.336	23.537	25.528	19.933	20.483
614.5	22.448	24.126	25.49	28.763	24.472	27.748	21.262	20.312	23.413	25.505	19.973	20.476
615	22.374	24.167	25.385	28.617	24.364	27.716	21.273	20.306	23.309	25.447	19.98	20.384
615.5	22.341	24.196	25.332	28.522	24.299	27.731	21.276	20.311	23.274	25.455	19.919	20.3
616	22.281	24.171	25.276	28.309	24.19	27.619	21.3	20.316	23.411	25.479	19.858	20.285
616.5	22.278	24.153	25.224	28.131	24.163	27.498	21.245	20.304	23.565	25.515	19.882	20.338
617	22.237	24.194	25.202	27.977	24.102	27.401	21.211	20.261	23.628	25.446	19.923	20.379
617.5	22.203	24.15	25.203	27.876	24.101	27.359	21.185	20.207	23.511	25.251	19.86	20.345
618	22.213	24.071	25.162	27.886	24.115	27.308	21.175	20.159	23.366	25.047	19.779	20.335
618.5	22.194	23.871	25.139	27.949	24.109	27.243	21.148	20.118	23.279	24.943	19.725	20.309
619	22.192	23.763	25.121	27.975	24.025	27.161	21.004	20.081	23.228	24.915	19.781	20.335
619.5	22.185	23.778	25.135	27.935	23.887	27.124	20.935	20.087	23.235	24.922	19.776	20.303
620	22.149	23.883	25.058	27.842	23.745	27.137	20.942	20.152	23.23	24.959	19.717	20.248
620.5	22.152	23.949	25.026	27.692	23.645	27.126	21.005	20.148	23.213	24.982	19.638	20.211
621	22.135	23.895	24.99	27.588	23.589	27.094	21.019	20.03	23.173	24.995	19.628	20.219
621.5	22.089	23.794	24.992	27.433	23.568	27.11	20.902	19.901	23.156	24.884	19.663	20.241
622	22.091	23.72	24.958	27.316	23.681	27.136	20.801	19.87	23.197	24.798	19.676	20.256
622.5	22.048	23.772	24.931	27.247	23.766	27.129	20.715	19.892	23.235	24.705	19.673	20.261
623	22.074	23.789	24.981	27.209	23.777	26.982	20.726	19.89	23.206	24.694	19.64	20.291
623.5	22.087	23.755	24.956	27.227	23.737	26.871	20.822	19.871	23.205	24.701	19.651	20.276
624	22.104	23.677	24.945	27.257	23.694	26.863	20.941	19.822	23.209	24.67	19.591	20.158
624.5	22.127	23.69	24.921	27.256	23.74	26.893	20.988	19.797	23.277	24.607	19.542	20.038
625	22.085	23.717	24.946	27.237	23.752	26.91	21.014	19.793	23.329	24.58	19.505	19.957
625.5	22.038	23.696	24.926	27.168	23.702	26.819	20.986	19.841	23.373	24.575	19.532	19.985
626	21.956	23.668	24.847	27.052	23.64	26.74	20.969	19.898	23.349	24.53	19.591	20.036
626.5	21.894	23.674	24.802	27.003	23.586	26.763	20.936	19.916	23.231	24.47	19.576	20.077
627	21.922	23.744	24.886	26.99	23.586	26.816	20.92	19.977	23.113	24.437	19.513	20.11
627.5	21.996	23.818	24.985	27.112	23.625	26.885	20.939	19.973	23.049	24.519	19.437	20.108
628	22.064	23.902	25.061	27.24	23.682	26.917	20.917	19.923	23.106	24.581	19.396	20.102
628.5	22.049	23.943	24.98	27.307	23.75	26.937	20.933	19.807	23.135	24.587	19.42	20.064
629	21.987	23.897	24.909	27.299	23.719	26.903	20.958	19.722	23.117	24.572	19.476	20.071
629.5	21.993	23.802	24.846	27.194	23.647	26.834	20.932	19.679	23.078	24.552	19.549	20.12
630	22.024	23.731	24.83	27.131	23.58	26.729	20.857	19.679	23.088	24.592	19.595	20.113
630.5	22.039	23.754	24.854	27.155	23.548	26.672	20.833	19.712	23.142	24.567	19.585	20.085
631	21.984	23.802	24.899	27.189	23.474	26.683	20.828	19.795	23.18	24.517	19.509	20.033
631.5	21.932	23.815	24.962	27.173	23.498	26.648	20.787	19.832	23.119	24.422	19.443	20.022
632	21.976	23.802	25.041	27.027	23.495	26.552	20.696	19.808	23.077	24.373	19.374	20.007
632.5	22.059	23.804	25.054	26.936	23.489	26.441	20.675	19.773	23.031	24.354	19.383	19.99
633	22.092	23.808	25.066	26.903	23.411	26.442	20.762	19.758	23.072	24.384	19.392	19.944
633.5	22.094	23.791	25	26.956	23.419	26.541	20.825	19.829	23.066	24.425	19.374	19.86
634	22.048	23.75	24.883	26.966	23.475	26.573	20.812	19.849	23.062	24.465	19.326	19.776
634.5	22.007	23.712	24.763	26.851	23.408	26.519	20.745	19.81	23.048	24.5	19.303	19.753
635	22	23.721	24.705	26.648	23.266	26.464	20.639	19.714	23.012	24.473	19.345	19.808
635.5	22.04	23.728	24.679	26.435	23.167	26.484	20.599	19.648	22.959	24.408	19.4	19.848
636	22.123	23.765	24.737	26.398	23.18	26.49	20.626	19.658	22.912	24.306	19.429	19.797
636.5	22.027	23.693	24.686	26.397	23.207	26.457	20.694	19.596	22.88	24.237	19.387	19.743
637	21.847	23.589	24.604	26.334	23.14	26.431	20.768	19.504	22.867	24.158	19.369	19.697
637.5	21.637	23.487	24.481	26.226	23.083	26.425	20.774	19.41	22.847	24.001	19.336	19.687
638	21.604	23.485	24.44	26.15	22.985	26.401	20.691	19.398	22.798	23.828	19.367	19.717
638.5	21.628	23.534	24.505	26.089	22.887	26.303	20.562	19.395	22.662	23.708	19.305	19.715
639	21.625	23.509	24.514	25.973	22.793	26.147	20.487	19.342	22.501	23.691	19.212	19.709
639.5	21.624	23.491	24.453	25.788	22.761	25.996	20.466	19.294	22.43	23.679	19.138	19.638
640	21.693	23.519	24.408	25.693	22.781	25.859	20.444	19.235	22.453	23.639	19.154	19.543
640.5	21.696	23.553	24.335	25.678	22.761	25.77	20.416	19.203	22.471	23.564	19.164	19.468
641	21.676	23.556	24.244	25.717	22.618	25.752	20.415	19.227	22.452	23.475	19.19	19.391
641.5	21.67	23.513	24.119	25.599	22.434	25.687	20.456	19.251	22.431	23.387	19.174	19.322
642	21.752	23.476	24.06	25.438	22.279	25.605	20.449	19.295	22.425	23.295	19.158	19.315
642.5	21.745	23.393	24.079	25.195	22.179	25.449	20.461	19.247	22.428	23.24	19.1	19.363
643	21.686	23.257	24.039	25.037	22.079	25.383	20.393	19.177	22.419	23.161	19.009	19.449
643.5	21.675	23.172	23.945	24.863	21.952	25.334	20.356	19.149	22.406	23.047	18.927	19.46
644	21.665	23.211	23.916	24.755	21.866	25.345	20.241	19.141	22.336	22.89	18.866	19.423
644.5	21.611	23.23	23.92	24.651	21.827	25.232	20.257	19.105	22.345	22.892	18.874	19.382
645	21.476	23.201	23.889	24.507	21.755	25.057	20.22	19.014	22.359	22.911	18.894	19.366
645.5	21.38	23.116	23.751	24.327	21.72	24.783	20.263	18.981	22.382	22.915	18.921	19.363
646	21.324	23.08	23.651	24.139	21.678	24.625	20.236	19.037	22.305	22.772	18.93	19.304
646.5	21.335	23.101	23.643	24.004	21.675	24.601	20.269	19.055	22.273	22.605	18.966	19.268
647	21.333	23.109	23.608	23.962	21.607	24.669	20.223	19.008	22.214	22.452	18.944	19.225
647.5	21.316	23.046	23.474	23.94	21.448	24.629	20.181	18.93	22.136	22.358	18.898	19.2
648	21.256	22.931	23.272	23.922	21.298	24.537	20.13	18.952	22.053	22.349	18.87	19.185
648.5	21.228	22.813	23.172	23.839	21.211	24.427	20.133	18.933	22.085	22.4	18.878	19.155
649	21.198	22.806	23.169	23.729	21.276	24.388	20.14	18.903	22.131	22.386	18.865	19.145
649.5	21.197	22.917	23.267	23.603	21.244	24.367	20.104	18.841	22.102	22.288	18.791	19.085
650	21.134	22.957	23.24	23.431	21.147	24.368	20.145	18.887	22.037	22.188	18.784	19.033
650.5	21.093	22.906	23.16	23.328	21.04	24.332	20.183	18.914	21.979	22.118	18.807	19.058
651	20.994	22.797	22.985	23.266	21.031	24.282	20.231	18.892	21.95	22.063	18.84	19.108
651.5	21.028	22.828	22.965	23.273	21.116	24.254	20.209	18.744	21.91	22.031	18.796	19.083
652	21.122	22.865	23.018	23.249	21.162	24.286	20.224	18.698	21.921	22.07	18.735	19.011
652.5	21.219	22.888	23.165	23.189	21.185	24.274	20.271	18.718	21.989	22.106	18.707	18.907
653	21.247	22.853	23.178	23.143	21.156	24.268	20.198	18.806	22.061	22.027	18.685	18.886
653.5	21.169	22.817	23.168	23.059	21.053	24.259	20.118	18.815	22.099	21.924	18.687	18.807
654	21.072	22.773	23.078	23.022	20.961	24.273	20.018	18.809	22.086	21.904	18.688	18.751
654.5	20.988	22.757	22.98	22.924	20.829	24.21	20.017	18.713	22.046	21.914	18.674	18.743
655	20.94	22.813	22.9	22.886	20.814	24.038	20.04	18.672	22.062	21.962	18.656	18.793
655.5	20.957	22.889	22.881	22.844	20.863	23.862	20.11	18.647	22.043	21.887	18.659	18.867
656	20.989	22.875	23.004	22.802	20.956	23.831	20.153	18.634	21.926	21.762	18.696	18.925
656.5	21.064	22.775	23.036	22.778	20.958	23.848	20.176	18.617	21.836	21.639	18.74	18.973
657	21.098	22.674	23.036	22.739	20.892	23.793	20.161	18.614	21.889	21.662	18.672	18.969
657.5	21.127	22.619	22.927	22.708	20.749	23.636	20.189	18.628	22.002	21.715	18.627	18.941
658	21.103	22.576	22.865	22.674	20.653	23.553	20.199	18.646	22.023	21.724	18.574	18.898
658.5	21.119	22.54	22.775	22.558	20.574	23.551	20.145	18.668	21.951	21.678	18.649	18.88
659	21.11	22.552	22.722	22.407	20.497	23.461	20.087	18.697	21.911	21.65	18.702	18.792
659.5	21.079	22.627	22.721	22.195	20.467	23.26	20.038	18.694	21.925	21.587	18.749	18.707
660	20.983	22.67	22.723	22.047	20.438	23.115	20.043	18.62	21.917	21.481	18.729	18.654
660.5	20.966	22.741	22.708	21.982	20.457	23.065	20.09	18.556	21.911	21.432	18.697	18.634
661	21.014	22.827	22.642	21.975	20.371	23.047	20.148	18.521	21.861	21.38	18.657	18.604
661.5	21.054	22.839	22.629	21.976	20.327	23.021	20.181	18.55	21.851	21.366	18.595	18.536
662	21.081	22.757	22.591	21.909	20.283	22.985	20.082	18.616	21.814	21.307	18.577	18.544
662.5	21.019	22.594	22.498	21.815	20.301	22.931	19.976	18.62	21.736	21.287	18.581	18.563
663	21.009	22.589	22.399	21.642	20.316	22.805	19.894	18.478	21.642	21.251	18.631	18.57
663.5	20.979	22.616	22.391	21.503	20.223	22.658	19.891	18.334	21.608	21.191	18.597	18.493
664	21.027	22.671	22.49	21.412	20.095	22.566	19.919	18.328	21.703	21.168	18.52	18.42
664.5	21.06	22.604	22.536	21.449	19.959	22.562	19.973	18.482	21.773	21.181	18.428	18.42
665	21.079	22.535	22.489	21.404	19.942	22.565	20.052	18.582	21.779	21.214	18.421	18.458
665.5	21.062	22.473	22.385	21.306	19.974	22.573	20.109	18.621	21.759	21.2	18.451	18.437
666	21.059	22.445	22.371	21.245	19.977	22.565	20.093	18.579	21.763	21.188	18.446	18.404
666.5	21.032	22.454	22.339	21.241	19.981	22.586	20.024	18.565	21.785	21.148	18.429	18.392
667	21.025	22.484	22.347	21.235	19.97	22.542	19.979	18.499	21.738	21.124	18.425	18.435
667.5	21.046	22.535	22.323	21.126	19.979	22.508	20.056	18.524	21.731	21.048	18.465	18.474
668	21.096	22.604	22.371	21.041	19.982	22.429	20.159	18.523	21.772	21.055	18.498	18.462
668.5	21.172	22.568	22.371	21.022	20.021	22.388	20.182	18.521	21.812	21.073	18.491	18.439
669	21.223	22.535	22.388	21.089	20.046	22.316	20.074	18.44	21.819	21.013	18.468	18.41
669.5	21.266	22.501	22.454	21.203	20.062	22.33	20.052	18.461	21.807	20.973	18.411	18.387
670	21.353	22.536	22.497	21.241	20.012	22.307	20.051	18.508	21.769	20.9	18.409	18.361
670.5	21.401	22.568	22.457	21.215	20.019	22.294	20.107	18.552	21.694	20.903	18.456	18.31
671	21.378	22.571	22.349	21.113	19.981	22.252	20.158	18.568	21.722	20.975	18.444	18.249
671.5	21.297	22.603	22.33	21.018	19.96	22.153	20.26	18.594	21.807	21.067	18.375	18.251
672	21.26	22.604	22.338	20.959	19.902	22.041	20.42	18.668	21.916	21.147	18.292	18.257
672.5	21.291	22.669	22.373	21.021	19.927	21.954	20.464	18.741	21.976	21.168	18.329	18.301
673	21.357	22.777	22.431	21.133	20.011	21.971	20.428	18.772	22.003	21.177	18.386	18.324
673.5	21.398	22.841	22.522	21.193	20.071	22.092	20.381	18.813	22.008	21.171	18.449	18.374
674	21.408	22.806	22.617	21.233	20.129	22.253	20.384	18.832	21.932	21.133	18.494	18.363
674.5	21.379	22.748	22.601	21.206	20.119	22.411	20.383	18.871	22	21.176	18.541	18.314
675	21.429	22.809	22.574	21.2	20.165	22.425	20.379	18.887	22.085	21.239	18.527	18.302
675.5	21.499	22.846	22.605	21.181	20.243	22.386	20.38	18.88	22.194	21.253	18.49	18.339
676	21.55	22.829	22.649	21.291	20.368	22.362	20.456	18.9	22.231	21.232	18.49	18.379
676.5	21.556	22.747	22.7	21.358	20.423	22.372	20.556	18.889	22.278	21.33	18.533	18.385
677	21.647	22.781	22.759	21.38	20.375	22.403	20.689	18.913	22.303	21.461	18.584	18.36
677.5	21.734	22.898	22.868	21.396	20.351	22.399	20.771	19	22.335	21.572	18.619	18.414
678	21.805	23.08	22.946	21.546	20.443	22.432	20.817	19.095	22.315	21.578	18.679	18.459
678.5	21.766	23.193	22.947	21.756	20.64	22.522	20.81	19.148	22.343	21.553	18.716	18.46
679	21.762	23.285	22.969	21.79	20.669	22.581	20.792	19.195	22.381	21.572	18.679	18.411
679.5	21.817	23.332	23.028	21.724	20.694	22.628	20.815	19.206	22.488	21.587	18.613	18.37
680	21.904	23.386	23.088	21.661	20.757	22.673	20.85	19.187	22.54	21.603	18.589	18.382
680.5	21.967	23.392	23.084	21.743	20.827	22.799	20.931	19.167	22.576	21.565	18.643	18.384
681	21.996	23.379	23.112	21.907	20.817	22.894	20.937	19.233	22.605	21.586	18.721	18.465
681.5	22.088	23.372	23.174	22.027	20.832	22.923	21.009	19.295	22.646	21.657	18.759	18.545
682	22.135	23.43	23.249	22.194	21.021	22.904	21.12	19.332	22.684	21.784	18.781	18.576
682.5	22.159	23.52	23.328	22.268	21.197	22.888	21.156	19.376	22.742	21.937	18.815	18.555
683	22.132	23.587	23.405	22.385	21.312	22.97	21.108	19.458	22.791	22.026	18.83	18.598
683.5	22.195	23.701	23.51	22.486	21.391	23.135	21.034	19.477	22.797	22.058	18.883	18.688
684	22.356	23.776	23.613	22.575	21.499	23.292	21.058	19.457	22.83	22.078	18.953	18.788
684.5	22.435	23.802	23.772	22.694	21.619	23.443	21.132	19.421	22.878	22.176	19.04	18.789
685	22.35	23.802	23.872	22.851	21.736	23.577	21.213	19.392	22.933	22.307	19.061	18.752
685.5	22.22	23.826	23.951	23.127	21.851	23.741	21.273	19.456	22.935	22.451	19.081	18.71
686	22.213	23.838	23.981	23.345	21.983	23.905	21.269	19.564	22.928	22.613	19.124	18.774
686.5	22.3	23.789	24.086	23.483	22.131	24.109	21.197	19.672	22.952	22.728	19.189	18.863
687	22.361	23.799	24.138	23.687	22.239	24.286	21.162	19.721	23.033	22.82	19.177	18.956
687.5	22.497	23.936	24.264	23.972	22.309	24.449	21.265	19.768	23.166	22.942	19.173	19.02
688	22.67	24.134	24.396	24.392	22.516	24.665	21.407	19.853	23.373	23.196	19.232	19.131
688.5	22.845	24.309	24.562	24.768	22.876	25.024	21.507	19.923	23.537	23.563	19.385	19.236
689	22.958	24.44	24.84	25.086	23.229	25.318	21.516	19.996	23.696	23.866	19.546	19.382
689.5	22.98	24.481	25.111	25.324	23.455	25.692	21.577	20.053	23.833	24.045	19.62	19.554
690	23.043	24.518	25.392	25.646	23.611	26.116	21.703	20.176	24.01	24.281	19.71	19.729
690.5	23.128	24.599	25.644	26.11	23.931	26.624	21.9	20.365	24.185	24.695	19.793	19.847
691	23.232	24.749	25.858	26.606	24.303	27.042	22.081	20.55	24.31	25.182	19.891	19.896
691.5	23.248	24.88	26.035	27.175	24.708	27.435	22.242	20.726	24.521	25.619	19.966	19.984
692	23.292	24.952	26.188	27.713	25.059	27.875	22.346	20.839	24.765	25.897	20.106	20.101
692.5	23.472	25.091	26.563	28.332	25.523	28.371	22.496	21.046	25.118	26.239	20.273	20.289
693	23.695	25.29	26.909	28.928	26.044	28.889	22.688	21.249	25.355	26.574	20.466	20.518
693.5	23.967	25.49	27.202	29.596	26.599	29.444	22.927	21.501	25.538	27.057	20.608	20.757
694	24.165	25.692	27.408	30.255	27.179	29.985	23.245	21.737	25.733	27.549	20.785	20.981
694.5	24.405	25.932	27.655	30.949	27.772	30.572	23.626	21.908	26.091	28.094	20.992	21.179
695	24.649	26.29	27.955	31.67	28.348	31.07	23.917	22.079	26.565	28.72	21.162	21.363
695.5	24.917	26.61	28.228	32.35	28.875	31.469	24.113	22.38	26.971	29.348	21.33	21.469
696	25.152	26.819	28.578	33.047	29.433	31.905	24.289	22.854	27.332	29.953	21.494	21.652
696.5	25.398	26.931	28.816	33.678	29.987	32.502	24.549	23.294	27.625	30.438	21.756	21.915
697	25.811	27.083	29.117	34.35	30.486	33.144	24.913	23.631	27.967	30.873	21.997	22.187
697.5	26.222	27.302	29.407	35.028	30.885	33.723	25.321	23.934	28.382	31.31	22.264	22.442
698	26.535	27.535	29.768	35.668	31.336	34.308	25.718	24.254	28.813	31.78	22.509	22.709
698.5	26.839	27.797	30.09	36.343	31.998	34.853	26.092	24.611	29.279	32.379	22.769	23.013
699	27.29	28.113	30.455	36.997	32.733	35.419	26.538	25.045	29.71	33.092	23.016	23.21
699.5	27.808	28.551	30.855	37.838	33.443	35.916	27.053	25.533	30.203	33.812	23.265	23.334
700	28.144	28.984	31.205	38.521	33.927	36.491	27.474	26.015	30.629	34.444	23.545	23.438
700.5	28.329	29.372	31.397	39.13	34.324	36.924	27.794	26.381	31.002	34.902	23.836	23.62
701	28.5	29.669	31.601	39.552	34.623	37.376	28.121	26.68	31.346	35.31	24.115	23.916
701.5	28.822	29.95	31.917	40.083	35.078	37.772	28.581	26.984	31.777	35.845	24.334	24.236
702	29.247	30.258	32.328	40.691	35.676	38.273	29.074	27.311	32.293	36.487	24.596	24.518
702.5	29.731	30.549	32.711	41.362	36.296	38.782	29.543	27.715	32.913	37.169	24.92	24.748
703	30.155	30.833	32.997	41.998	36.889	39.303	29.936	28.12	33.467	37.762	25.241	24.958
703.5	30.603	31.123	33.273	42.462	37.34	39.759	30.352	28.646	33.998	38.288	25.512	25.166
704	31.049	31.386	33.457	42.986	37.708	40.21	30.837	29.124	34.459	38.733	25.755	25.359
704.5	31.47	31.638	33.608	43.546	38.079	40.622	31.339	29.566	34.939	39.174	26.011	25.605
705	31.802	31.845	33.725	44.175	38.628	41.013	31.803	29.97	35.322	39.592	26.238	25.801
705.5	32.143	32.063	33.819	44.698	39.174	41.341	32.278	30.392	35.685	40.138	26.488	25.999
706	32.585	32.24	34.018	45.161	39.67	41.65	32.733	30.867	36.037	40.604	26.766	26.157
706.5	33.059	32.51	34.353	45.635	40.108	41.976	33.125	31.265	36.433	41.024	27.072	26.317
707	33.508	32.846	34.774	46.217	40.687	42.38	33.464	31.675	36.82	41.455	27.33	26.406
707.5	33.825	33.203	35.108	46.794	41.133	42.752	33.886	32.052	37.229	41.949	27.576	26.567
708	34.205	33.432	35.347	47.255	41.566	43.141	34.381	32.546	37.696	42.528	27.847	26.769
708.5	34.598	33.615	35.642	47.569	42.007	43.579	34.779	33.056	38.105	42.922	28.145	26.966
709	35.015	33.865	35.959	48.006	42.418	44.043	35.197	33.527	38.539	43.358	28.463	27.08
709.5	35.416	34.226	36.205	48.476	42.778	44.288	35.724	33.908	39.068	43.83	28.678	27.208
710	35.787	34.597	36.216	49.065	43.142	44.493	36.281	34.303	39.664	44.412	28.875	27.429
710.5	36.143	34.91	36.211	49.609	43.529	44.759	36.777	34.753	40.178	44.858	29.117	27.676
711	36.425	35.141	36.309	49.991	43.85	45.153	37.266	35.218	40.584	45.164	29.482	27.877
711.5	36.828	35.364	36.598	50.202	44.109	45.379	37.86	35.635	41.037	45.414	29.775	28.006
712	37.288	35.645	37.003	50.36	44.4	45.566	38.347	36.009	41.46	45.729	30.025	28.138
712.5	37.766	35.992	37.259	50.703	44.719	45.79	38.786	36.419	41.755	46.195	30.265	28.322
713	38.221	36.352	37.445	51.124	45.154	46.204	39.266	36.928	42.13	46.825	30.536	28.493
713.5	38.691	36.598	37.623	51.582	45.589	46.589	39.925	37.433	42.548	47.372	30.828	28.672
714	39.117	36.697	37.86	52.083	46.052	46.891	40.513	37.945	43.045	47.857	31.19	28.875
714.5	39.402	36.788	38.087	52.527	46.462	47.113	41.022	38.375	43.471	48.313	31.589	29.101
715	39.688	36.945	38.197	52.813	46.708	47.284	41.407	38.801	43.89	48.806	31.818	29.299
715.5	40.041	37.228	38.412	53.104	46.962	47.533	41.732	39.158	44.243	49.189	31.951	29.451
716	40.49	37.595	38.66	53.468	47.242	47.782	42.114	39.615	44.712	49.566	32.13	29.532
716.5	40.816	37.926	38.881	53.89	47.681	48.058	42.602	40.102	45.288	49.94	32.456	29.582
717	41.145	38.183	39.072	54.2	48.028	48.28	43.118	40.532	45.794	50.182	32.888	29.718
717.5	41.436	38.261	39.077	54.491	48.384	48.612	43.569	40.868	46.133	50.399	33.222	29.903
718	41.818	38.463	39.225	54.853	48.726	48.936	43.936	41.156	46.405	50.719	33.482	30.091
718.5	42.225	38.694	39.338	55.128	49.026	49.189	44.428	41.51	46.757	51.171	33.694	30.221
719	42.58	38.833	39.426	55.438	49.253	49.345	44.976	41.936	47.175	51.584	33.963	30.399
719.5	42.86	38.93	39.53	55.738	49.371	49.574	45.616	42.472	47.647	51.917	34.222	30.523
720	43.226	39.188	39.797	56.117	49.504	49.834	46.119	42.997	48.007	52.249	34.474	30.662
720.5	43.782	39.547	40.083	56.467	49.819	50.064	46.464	43.429	48.388	52.603	34.743	30.77
721	44.267	39.864	40.145	56.716	50.216	50.142	46.756	43.869	48.755	53.003	34.97	30.871
721.5	44.613	40.087	40.206	56.932	50.503	50.193	47.179	44.259	49.167	53.413	35.128	30.933
722	44.734	40.282	40.273	57.183	50.597	50.29	47.645	44.595	49.466	53.676	35.233	31.039
722.5	44.992	40.482	40.46	57.518	50.882	50.398	48.075	44.858	49.746	53.864	35.456	31.144
723	45.267	40.714	40.702	57.82	51.337	50.501	48.442	45.235	50.114	54.241	35.754	31.263
723.5	45.753	40.947	40.998	58.1	51.672	50.657	48.843	45.697	50.465	54.708	36.132	31.419
724	46.18	41.062	41.142	58.331	51.681	50.859	49.163	46.122	50.806	55.119	36.447	31.626
724.5	46.547	41.169	41.149	58.571	51.713	51.09	49.5	46.483	51.09	55.309	36.664	31.744
725	46.805	41.275	41.122	58.774	51.889	51.169	49.846	46.745	51.371	55.41	36.671	31.776
725.5	46.912	41.408	41.088	59.075	52.186	51.183	50.249	46.977	51.612	55.54	36.696	31.77
726	47.026	41.589	41.102	59.273	52.488	51.312	50.633	47.319	51.952	55.861	36.815	31.886
726.5	47.174	41.788	41.195	59.481	52.774	51.726	50.912	47.756	52.255	56.221	37.109	31.986
727	47.419	41.959	41.383	59.594	53.021	52.107	51.225	48.124	52.62	56.471	37.376	32.107
727.5	47.757	42.079	41.595	59.922	53.308	52.244	51.468	48.466	53.044	56.724	37.646	32.187
728	48.211	42.333	41.781	60.178	53.54	52.203	51.793	48.872	53.437	57.029	37.775	32.277
728.5	48.564	42.538	41.936	60.522	53.698	52.288	52.159	49.242	53.665	57.363	37.941	32.403
729	48.775	42.652	41.989	60.636	53.863	52.356	52.598	49.456	53.758	57.474	38.068	32.495
729.5	48.864	42.819	42.042	60.71	53.982	52.424	53.104	49.667	54.089	57.614	38.269	32.587
730	49.069	42.972	42.074	60.818	54.101	52.584	53.42	49.979	54.482	57.855	38.466	32.54
730.5	49.253	43.135	42.151	61.074	54.136	52.849	53.749	50.434	54.901	58.166	38.718	32.626
731	49.35	43.25	42.151	61.437	54.334	52.988	53.975	50.706	55.059	58.383	38.917	32.688
731.5	49.479	43.417	42.184	61.578	54.554	52.985	54.163	50.904	55.17	58.51	39.067	32.745
732	49.732	43.511	42.218	61.708	54.791	53.014	54.249	50.96	55.156	58.582	39.195	32.744
732.5	50.066	43.537	42.341	61.667	54.94	53.149	54.489	51.23	55.306	58.675	39.33	32.832
733	50.275	43.593	42.268	61.769	55.045	53.363	54.784	51.373	55.572	58.858	39.459	32.929
733.5	50.421	43.698	42.298	61.927	55.208	53.494	54.968	51.476	55.896	59.073	39.657	33.03
734	50.599	43.742	42.391	62.031	55.335	53.568	55.069	51.609	56.221	59.31	39.843	33.142
734.5	50.757	43.728	42.618	61.985	55.366	53.593	55.313	51.802	56.361	59.426	39.936	33.196
735	50.902	43.767	42.693	61.918	55.416	53.629	55.686	52.152	56.455	59.606	40.036	33.215
735.5	51.001	43.959	42.803	62.155	55.612	53.61	56.024	52.438	56.584	59.69	40.199	33.232
736	51.21	44.153	42.964	62.415	55.786	53.585	56.306	52.788	56.852	59.896	40.439	33.39
736.5	51.397	44.274	43.102	62.449	55.761	53.738	56.545	52.927	57.118	60.003	40.581	33.509
737	51.654	44.392	43.107	62.275	55.674	53.851	56.747	53.013	57.207	60.078	40.598	33.562
737.5	51.789	44.553	43.189	62.264	55.694	53.88	56.962	52.986	57.341	60.156	40.612	33.484
738	51.871	44.71	43.264	62.392	55.798	53.927	57.228	53.023	57.451	60.285	40.719	33.441
738.5	51.894	44.882	43.257	62.645	55.89	54.033	57.366	53.109	57.602	60.439	40.83	33.472
739	51.926	45.008	43.133	62.842	55.836	54.063	57.441	53.331	57.834	60.586	40.887	33.496
739.5	52.071	45.026	43.076	62.901	55.905	54.047	57.535	53.575	58.104	60.804	40.935	33.455
740	52.251	44.983	43.106	62.705	55.985	54.003	57.703	53.707	58.219	60.908	41.048	33.445
740.5	52.358	44.968	43.09	62.636	56.143	54.079	57.762	53.715	58.193	60.837	41.21	33.608
741	52.489	45.071	43.02	62.639	56.201	54.164	57.808	53.787	58.263	60.764	41.298	33.741
741.5	52.617	45.129	43.006	62.819	56.33	54.25	57.913	53.91	58.509	60.862	41.354	33.788
742	52.751	45.135	43.174	63.024	56.471	54.258	58.116	53.919	58.635	60.972	41.295	33.686
742.5	52.78	45.038	43.421	63.152	56.502	54.349	58.264	53.869	58.638	60.929	41.392	33.672
743	52.751	45.136	43.505	63.168	56.482	54.614	58.545	54.101	58.732	60.957	41.537	33.719
743.5	52.775	45.322	43.472	63.194	56.591	54.781	58.754	54.42	58.975	61.101	41.78	33.822
744	52.798	45.523	43.445	63.317	56.747	54.709	58.73	54.644	59.174	61.294	41.838	33.827
744.5	52.945	45.48	43.434	63.373	56.83	54.473	58.549	54.694	59.195	61.458	41.761	33.798
745	53.04	45.319	43.396	63.343	56.889	54.52	58.44	54.717	59.109	61.444	41.673	33.847
745.5	53.071	45.223	43.383	63.445	56.919	54.656	58.567	54.683	59.071	61.386	41.702	33.948
746	53.076	45.214	43.376	63.605	56.972	54.714	58.69	54.665	59.07	61.393	41.759	33.944
746.5	53.104	45.241	43.344	63.722	57.037	54.622	58.918	54.838	59.168	61.585	41.818	33.891
747	53.147	45.169	43.361	63.708	57.163	54.563	59.172	55.025	59.281	61.76	41.921	33.865
747.5	53.157	45.318	43.427	63.695	57.116	54.414	59.449	55.237	59.486	61.923	42.047	33.929
748	53.222	45.571	43.582	63.69	57.126	54.328	59.417	55.218	59.669	61.995	42.186	33.986
748.5	53.29	45.868	43.587	63.726	57.158	54.359	59.372	55.171	59.717	61.998	42.231	33.995
749	53.402	45.948	43.637	63.874	57.276	54.64	59.412	55.075	59.684	62.005	42.255	33.986
749.5	53.47	45.875	43.563	64.009	57.416	54.816	59.52	55.077	59.685	62.076	42.256	34.014
750	53.507	45.762	43.531	64.02	57.441	54.752	59.639	55.137	59.76	62.139	42.364	34.011
750.5	53.472	45.703	43.422	63.996	57.351	54.609	59.802	55.36	59.79	62.116	42.404	33.991
751	53.478	45.661	43.452	64.015	57.38	54.656	59.773	55.565	59.729	62.091	42.443	34.061
751.5	53.529	45.631	43.516	63.998	57.469	54.652	59.695	55.631	59.789	62.139	42.486	34.155
752	53.57	45.6	43.656	63.988	57.586	54.568	59.714	55.544	59.794	62.214	42.629	34.264
752.5	53.645	45.761	43.722	64.019	57.685	54.603	59.921	55.579	59.956	62.345	42.716	34.237
753	53.735	45.835	43.708	64.071	57.879	54.787	60.06	55.637	60.097	62.304	42.776	34.201
753.5	53.742	45.877	43.622	64.114	57.942	54.856	60.134	55.666	60.213	62.209	42.735	34.143
754	53.567	45.717	43.569	64.021	57.946	54.811	60.146	55.696	60.069	62.053	42.751	34.183
754.5	53.524	45.682	43.539	63.958	57.958	54.78	60.149	55.859	59.936	62.023	42.707	34.218
755	53.668	45.731	43.46	63.881	57.901	54.797	60.073	56.05	59.914	62.028	42.78	34.258
755.5	53.859	45.889	43.432	63.966	57.867	54.807	59.883	55.976	59.936	62.078	42.918	34.311
756	53.897	45.907	43.589	63.981	57.786	54.872	59.842	55.9	59.897	62.18	43.06	34.402
756.5	53.763	45.87	43.71	63.926	57.791	54.919	59.938	55.821	59.899	62.367	43.119	34.468
757	53.724	45.836	43.685	63.965	57.748	54.88	60.074	55.772	59.926	62.382	43.15	34.465
757.5	53.618	45.746	43.525	64.025	57.709	54.828	60.058	55.718	59.947	62.306	43.175	34.368
758	53.629	45.64	43.471	64.056	57.654	54.927	60.065	55.665	59.895	62.134	43.148	34.3
758.5	53.587	45.646	43.475	63.857	57.509	55.13	60.123	55.764	60.017	62.184	43.188	34.377
759	53.619	45.858	43.577	63.901	57.527	55.155	60.284	55.912	60.296	62.325	43.195	34.434
759.5	53.714	46.007	43.683	64.123	57.542	54.931	60.442	56.032	60.686	62.556	43.16	34.462
760	53.822	46.023	43.706	64.294	57.703	54.784	60.393	55.797	60.59	62.491	43.157	34.404
760.5	53.896	46.01	43.732	64.221	57.77	54.754	60.313	55.618	60.313	62.321	43.272	34.376
761	53.856	45.992	43.724	64.058	57.762	54.826	60.189	55.663	60.061	62.193	43.379	34.344
761.5	53.822	45.868	43.79	63.965	57.669	54.813	60.129	55.948	60.098	62.282	43.374	34.352
762	53.84	45.83	43.779	63.899	57.625	54.748	60.225	55.995	60.205	62.435	43.406	34.352
762.5	53.941	45.879	43.848	63.841	57.602	54.752	60.471	55.888	60.318	62.652	43.414	34.284
763	53.961	46.005	43.84	64.092	57.724	54.808	60.617	55.791	60.376	62.751	43.421	34.3
763.5	53.856	46.01	43.773	64.305	57.864	54.914	60.532	55.853	60.477	62.724	43.321	34.368
764	53.735	46.047	43.668	64.346	57.894	54.936	60.427	56.063	60.565	62.62	43.264	34.382
764.5	53.742	46.099	43.597	64.129	57.831	54.813	60.361	56.16	60.639	62.616	43.208	34.329
765	53.791	46.01	43.56	64.075	57.847	54.654	60.341	56.179	60.528	62.642	43.258	34.311
765.5	53.803	45.964	43.677	63.964	57.949	54.714	60.217	56.054	60.512	62.59	43.287	34.319
766	53.782	45.969	43.769	63.91	57.875	54.972	60.279	56	60.566	62.574	43.28	34.281
766.5	53.838	46.021	43.749	63.943	57.863	55.041	60.516	56.001	60.693	62.598	43.286	34.29
767	53.878	45.939	43.67	64.068	57.975	54.898	60.74	56.048	60.762	62.648	43.373	34.381
767.5	53.97	45.86	43.675	64.097	58.114	54.632	60.831	56.123	60.777	62.589	43.454	34.405
768	53.948	45.859	43.694	64.106	58.107	54.577	60.88	56.076	60.837	62.576	43.489	34.351
768.5	53.961	45.974	43.648	64.267	58.129	54.711	60.788	56.038	60.685	62.623	43.423	34.361
769	54.012	46.13	43.605	64.41	58.036	54.973	60.687	56.131	60.655	62.716	43.403	34.433
769.5	54.027	46.166	43.705	64.273	57.923	55.085	60.675	56.352	60.689	62.856	43.469	34.485
770	53.899	46.041	43.666	64.008	57.912	54.995	60.724	56.429	60.846	62.959	43.574	34.416
770.5	53.887	45.944	43.568	63.812	58.058	54.858	60.845	56.352	60.97	63.073	43.642	34.337
771	53.946	45.973	43.497	63.754	58.283	54.836	60.768	56.15	60.931	62.905	43.602	34.263
771.5	53.999	46.111	43.637	64.027	58.408	54.967	60.633	56.098	60.745	62.559	43.541	34.32
772	53.927	46.141	43.563	64.255	58.427	54.955	60.444	55.984	60.527	62.266	43.462	34.335
772.5	53.854	45.998	43.521	64.371	58.271	54.81	60.554	56.003	60.611	62.456	43.464	34.409
773	53.837	45.809	43.555	64.248	58.239	54.755	60.697	55.939	60.776	62.69	43.602	34.498
773.5	53.975	45.717	43.675	64.168	58.281	54.832	60.79	56.04	60.809	62.661	43.759	34.548
774	54.151	45.882	43.611	64.171	58.253	54.96	60.721	56.112	60.724	62.528	43.76	34.417
774.5	54.202	46.034	43.493	64.282	58.177	54.877	60.602	56.199	60.722	62.585	43.611	34.327
775	53.983	46.129	43.595	64.244	58.017	54.84	60.549	56.142	60.672	62.695	43.566	34.434
775.5	53.722	46.012	43.655	64.093	58.098	54.727	60.616	56.052	60.429	62.626	43.64	34.587
776	53.706	45.973	43.66	64.081	58.347	54.689	60.697	56.091	60.495	62.671	43.749	34.577
776.5	53.909	45.941	43.636	64.137	58.6	54.69	60.92	56.249	60.774	62.95	43.82	34.506
777	54.074	45.877	43.695	64.276	58.612	54.719	60.889	56.259	60.947	63.104	43.868	34.493
777.5	54.139	45.845	43.717	64.318	58.529	54.679	60.744	56.119	60.838	63.11	43.786	34.507
778	54.056	45.815	43.673	64.17	58.251	54.612	60.65	56.058	60.779	63.046	43.644	34.447
778.5	53.943	45.839	43.569	63.966	57.953	54.686	60.679	56.096	60.795	63.003	43.593	34.399
779	53.868	45.796	43.417	63.941	57.902	54.774	60.679	56.125	60.79	62.906	43.616	34.393
779.5	53.917	45.951	43.384	64.199	58.11	54.819	60.587	56.078	60.76	62.812	43.712	34.372
780	53.951	46.118	43.528	64.315	58.194	55.008	60.648	56.116	60.852	62.865	43.816	34.367
780.5	53.906	46.183	43.645	64.335	58.139	55.108	60.867	56.241	61.024	63.006	43.994	34.377
781	53.818	46.071	43.627	64.134	58.132	55.084	61.237	56.323	61.122	63.217	44.161	34.431
781.5	53.743	45.987	43.621	64.016	58.153	55.007	61.374	56.262	61.158	63.332	44.102	34.482
782	53.715	45.99	43.724	64.003	58.043	54.966	61.273	56.177	61.111	63.282	43.95	34.538
782.5	53.733	46.086	43.904	64.194	57.963	54.89	60.998	56.096	61.007	63.088	43.845	34.528
783	53.821	46.13	43.954	64.339	58.001	54.869	60.863	56.075	61.019	62.978	43.842	34.433
783.5	53.917	46.203	43.912	64.412	58.163	54.868	60.761	56.016	61.024	62.992	43.818	34.403
784	54.074	46.142	43.748	64.358	58.313	54.838	60.727	56.005	61.056	62.971	43.772	34.433
784.5	54.112	46.087	43.631	64.312	58.378	54.845	60.841	56.054	61.01	63.004	43.864	34.448
785	54.139	45.986	43.681	64.282	58.254	54.837	60.968	56.102	60.905	62.924	43.956	34.429
785.5	54.086	45.894	43.777	64.287	58.159	54.927	60.908	56.203	60.905	62.838	44.059	34.524
786	54.063	45.869	43.822	64.34	58.181	54.943	60.795	56.276	60.949	62.805	44.118	34.596
786.5	54.046	45.998	43.858	64.314	58.196	54.984	60.811	56.148	60.993	62.749	44.186	34.595
787	54.057	46.083	43.917	64.271	58.288	55.01	60.937	55.966	60.9	62.698	44.228	34.569
787.5	53.998	45.979	43.895	64.141	58.392	54.955	60.925	55.932	60.819	62.681	44.223	34.636
788	53.889	45.834	43.747	64.043	58.461	54.939	60.77	56.016	60.744	62.845	44.201	34.692
788.5	53.778	45.792	43.635	64.009	58.493	55.012	60.687	56.109	60.768	62.953	44.242	34.718
789	53.787	45.807	43.604	64.085	58.503	55.017	60.847	56.171	60.814	63.053	44.216	34.682
789.5	54.02	45.92	43.705	64.1	58.543	54.936	61.058	56.332	60.95	63.067	44.087	34.587
790	54.065	46.003	43.69	64.012	58.521	54.954	61.069	56.282	61.07	63.012	44.011	34.504
790.5	53.983	45.988	43.704	64.084	58.508	55.072	61.031	56.253	61.166	63.049	43.997	34.443
791	53.884	46.013	43.727	64.055	58.381	54.976	61.024	56.237	61.128	63.079	43.985	34.492
791.5	54.032	46.145	43.804	64.087	58.293	54.85	61.061	56.271	60.954	63.069	43.97	34.492
792	54.133	46.312	43.767	64.133	58.356	54.892	61.127	56.226	60.957	62.943	44.011	34.518
792.5	54.118	46.24	43.683	64.136	58.426	54.926	61.199	56.207	61.094	62.969	44.034	34.483
793	54.064	46.03	43.58	63.963	58.393	54.901	61.247	56.363	61.255	63.054	44.085	34.528
793.5	53.918	45.878	43.511	64.004	58.502	54.861	61.317	56.419	61.154	62.978	44.108	34.555
794	53.795	45.91	43.443	64.218	58.606	54.867	61.193	56.256	60.939	62.817	44.151	34.584
794.5	53.84	46.065	43.46	64.447	58.555	54.792	61.149	56.13	60.862	62.73	44.15	34.48
795	53.944	46.105	43.598	64.326	58.454	54.656	61.006	56.053	60.918	62.753	44.159	34.441
795.5	53.995	46.092	43.719	64.286	58.407	54.715	60.967	56.018	60.921	62.822	44.101	34.561
796	53.969	46.134	43.619	64.256	58.402	54.85	60.956	55.915	60.883	62.91	44.003	34.695
796.5	54.069	46.154	43.477	64.182	58.453	54.914	60.901	55.802	60.9	62.902	43.945	34.717
797	54.225	46.015	43.419	63.986	58.436	54.872	60.892	55.869	61.037	62.901	43.951	34.668
797.5	54.322	45.998	43.475	64.169	58.43	54.886	60.994	56.103	61.209	63.058	44.04	34.664
798	54.32	46.159	43.563	64.439	58.397	54.74	61.321	56.304	61.36	63.335	44.138	34.653
798.5	54.304	46.301	43.633	64.57	58.418	54.562	61.458	56.333	61.358	63.45	44.154	34.578
799	54.208	46.312	43.697	64.256	58.442	54.629	61.228	56.154	61.083	63.228	44.078	34.517
799.5	54.171	46.261	43.744	64.228	58.459	54.898	61.072	56.122	61.085	63.164	43.997	34.534
800	54.05	46.16	43.675	64.363	58.53	54.97	61.252	56.239	61.357	63.292	44.069	34.61
800.5	54.007	46.087	43.619	64.574	58.678	54.739	61.416	56.454	61.494	63.42	44.073	34.507
801	53.916	46.099	43.713	64.447	58.775	54.626	61.388	56.561	61.462	63.565	44.152	34.43
801.5	53.852	46.096	43.817	64.218	58.692	54.734	61.235	56.429	61.391	63.594	44.213	34.492
802	53.89	46.052	43.792	64.028	58.64	54.826	61.241	56.276	61.43	63.666	44.322	34.586
802.5	54.016	46.014	43.721	64	58.73	54.812	61.518	56.303	61.602	63.66	44.251	34.558
803	54.062	46.082	43.65	64.204	58.879	54.825	61.702	56.544	61.694	63.673	44.113	34.452
803.5	54.026	46.226	43.614	64.349	58.696	54.854	61.668	56.65	61.549	63.643	44.109	34.475
804	53.916	46.327	43.626	64.372	58.463	54.853	61.432	56.485	61.43	63.529	44.152	34.563
804.5	53.854	46.346	43.686	64.229	58.382	54.767	61.268	56.262	61.377	63.421	44.176	34.64
805	53.9	46.379	43.65	64.158	58.504	54.685	61.292	56.207	61.354	63.276	44.133	34.63
805.5	54.061	46.417	43.533	64.191	58.604	54.443	61.412	56.294	61.242	63.174	44.157	34.636
806	54.158	46.385	43.473	64.26	58.698	54.31	61.417	56.328	61.282	63.127	44.182	34.544
806.5	54.175	46.363	43.502	64.075	58.686	54.335	61.37	56.135	61.268	63.222	44.179	34.355
807	54.227	46.432	43.493	63.901	58.59	54.517	61.281	55.98	61.087	63.385	44.172	34.263
807.5	54.084	46.421	43.24	64.037	58.484	54.498	61.183	55.871	60.918	63.332	44.186	34.286
808	54.001	46.434	43.249	64.314	58.448	54.303	61.084	55.902	60.947	63.205	44.148	34.396
808.5	53.94	46.4	43.317	64.342	58.534	54.352	61.475	56.149	61.115	63.164	44.173	34.558
809	54.023	46.349	43.404	64.147	58.474	54.52	61.731	56.456	61.22	63.339	44.24	34.62
809.5	54.087	46.209	43.353	63.966	58.458	54.717	61.682	56.431	61.222	63.586	44.128	34.457
810	54.105	46.243	43.315	64.145	58.609	54.742	61.451	56.239	61.231	63.719	44.101	34.368
810.5	54.067	46.338	43.302	64.297	58.562	54.797	61.407	56.144	61.281	63.728	44.274	34.432
811	54.149	46.328	43.3	64.43	58.523	54.719	61.404	56.182	61.316	63.747	44.45	34.488
811.5	54.179	46.189	43.4	64.376	58.589	54.506	61.365	56.149	61.225	63.563	44.419	34.5
812	54.199	46.154	43.45	64.397	58.645	54.467	61.275	56.104	61.108	63.273	44.283	34.575
812.5	54.182	46.142	43.417	64.349	58.608	54.759	61.316	56.149	61.029	63.129	44.176	34.629
813	53.972	46.094	43.375	64.373	58.703	55.084	61.353	56.199	61.106	63.221	44.179	34.646
813.5	53.949	46.066	43.525	64.306	58.709	55.123	61.313	56.219	61.285	63.421	44.189	34.579
814	54.02	46.057	43.647	64.183	58.669	54.904	61.269	56.272	61.226	63.586	44.127	34.47
814.5	54.127	46.069	43.707	64.083	58.599	54.831	61.393	56.319	61.007	63.57	44.082	34.384
815	54.14	46.112	43.737	64.113	58.63	54.823	61.486	56.44	60.884	63.534	44.12	34.433
815.5	54.206	46.262	43.66	64.13	58.562	54.763	61.432	56.446	61.06	63.477	44.172	34.537
816	54.223	46.336	43.558	64.135	58.706	54.601	61.25	56.346	61.222	63.371	44.167	34.534
816.5	54.173	46.216	43.469	64.032	58.73	54.509	61.148	56.271	61.237	63.26	44.174	34.481
817	54.216	46.062	43.434	63.991	58.701	54.577	61.188	56.289	61.156	63.343	44.192	34.413
817.5	54.307	46.13	43.436	64.231	58.686	54.681	61.263	56.197	61.093	63.377	44.16	34.426
818	54.245	46.271	43.497	64.451	58.553	54.693	61.338	56.107	61.248	63.434	44.209	34.517
818.5	54.117	46.298	43.514	64.447	58.502	54.523	61.363	56.21	61.373	63.451	44.368	34.63
819	54.048	46.339	43.477	64.368	58.459	54.385	61.559	56.364	61.605	63.522	44.466	34.616
819.5	54.071	46.406	43.405	64.234	58.395	54.322	61.616	56.314	61.686	63.521	44.44	34.611
820	54.098	46.382	43.436	64.078	58.244	54.413	61.382	56.033	61.536	63.424	44.352	34.555
820.5	54.086	46.309	43.481	64.039	58.194	54.501	61.296	56.036	61.319	63.312	44.288	34.61
821	54.073	46.303	43.506	64.145	58.24	54.502	61.499	56.288	61.381	63.388	44.246	34.648
821.5	54.069	46.392	43.477	64.129	58.351	54.531	61.601	56.448	61.325	63.617	44.233	34.591
822	54.106	46.448	43.404	64.065	58.461	54.573	61.554	56.383	61.39	63.699	44.314	34.576
822.5	54.107	46.355	43.294	64.021	58.522	54.525	61.503	56.218	61.421	63.608	44.386	34.53
823	54.148	46.156	43.253	64.047	58.619	54.376	61.482	56.201	61.475	63.396	44.466	34.501
823.5	54.192	45.993	43.231	64.121	58.644	54.426	61.543	56.147	61.384	63.296	44.49	34.541
824	54.164	46.01	43.172	63.935	58.419	54.574	61.488	56.152	61.315	63.157	44.518	34.655
824.5	54.009	46.108	43.154	63.772	58.291	54.699	61.532	56.298	61.389	63.262	44.527	34.695
825	53.733	46.147	43.226	63.839	58.318	54.615	61.503	56.353	61.405	63.401	44.528	34.74
825.5	53.625	46.097	43.291	63.989	58.268	54.583	61.547	56.251	61.322	63.577	44.544	34.809
826	53.826	46.092	43.253	64.119	58.323	54.68	61.522	56.243	61.232	63.513	44.548	34.826
826.5	54.192	46.166	43.292	64.056	58.408	54.66	61.609	56.437	61.223	63.522	44.492	34.641
827	54.181	46.185	43.411	63.835	58.486	54.645	61.729	56.569	61.432	63.588	44.286	34.36
827.5	54.061	46.201	43.513	63.704	58.493	54.625	61.827	56.559	61.602	63.613	44.288	34.31
828	54.056	46.147	43.441	64.155	58.596	54.557	61.641	56.385	61.634	63.482	44.357	34.511
828.5	54.032	46.054	43.29	64.527	58.73	54.515	61.359	56.232	61.47	63.43	44.308	34.584
829	53.885	45.979	43.087	64.54	58.787	54.552	61.214	56.188	61.32	63.434	44.242	34.57
829.5	53.732	46.063	42.99	64.25	58.686	54.531	61.285	56.185	61.181	63.41	44.289	34.606
830	53.849	46.343	43.131	64.041	58.369	54.394	61.207	56.161	61.232	63.421	44.32	34.584
830.5	54.047	46.417	43.417	64.092	58.286	54.355	61.257	56.122	61.271	63.567	44.287	34.453
831	54.233	46.335	43.458	64.13	58.309	54.278	61.365	55.949	61.255	63.578	44.325	34.375
831.5	54.101	46.176	43.44	64.031	58.28	54.371	61.606	56.062	61.371	63.594	44.311	34.436
832	54.102	46.132	43.51	63.881	58.205	54.462	61.782	56.196	61.503	63.636	44.258	34.631
832.5	54.176	46.204	43.632	63.823	58.217	54.432	61.881	56.401	61.572	63.679	44.273	34.752
833	54.105	46.339	43.63	63.82	58.283	54.249	61.658	56.554	61.475	63.583	44.371	34.773
833.5	53.852	46.396	43.513	63.973	58.34	54.219	61.44	56.604	61.476	63.573	44.453	34.731
834	53.72	46.255	43.294	63.848	58.409	54.315	61.359	56.379	61.439	63.419	44.383	34.596
834.5	53.808	46.147	43.081	63.894	58.481	54.368	61.282	56.23	61.348	63.304	44.395	34.498
835	53.824	46.157	43.15	63.887	58.534	54.42	61.351	56.361	61.394	63.256	44.48	34.389
835.5	53.715	46.169	43.212	63.826	58.407	54.432	61.429	56.483	61.416	63.251	44.482	34.451
836	53.746	45.99	43.199	63.746	58.326	54.336	61.589	56.435	61.502	63.338	44.332	34.517
836.5	53.885	45.839	43.229	63.825	58.361	54.252	61.698	56.401	61.628	63.518	44.4	34.586
837	53.903	46.012	43.356	63.938	58.425	54.276	61.883	56.446	61.748	63.607	44.535	34.557
837.5	53.799	46.147	43.268	64.102	58.428	54.427	61.905	56.51	61.922	63.652	44.496	34.575
838	53.835	46.252	43.303	64.158	58.45	54.502	61.828	56.631	62.028	63.787	44.389	34.584
838.5	53.861	46.26	43.368	63.976	58.488	54.681	61.51	56.714	61.817	63.471	44.375	34.659
839	53.916	46.402	43.509	63.91	58.472	54.667	61.354	56.661	61.584	63.261	44.497	34.724
839.5	53.952	46.448	43.654	63.904	58.456	54.557	61.387	56.593	61.612	63.404	44.608	34.638
840	53.934	46.426	43.769	64.06	58.508	54.319	61.427	56.441	61.608	63.557	44.598	34.57
840.5	53.795	46.315	43.637	63.977	58.596	54.247	61.299	56.248	61.397	63.489	44.673	34.585
841	53.762	46.354	43.519	63.902	58.649	54.33	61.403	56.295	61.289	63.422	44.677	34.632
841.5	53.895	46.525	43.43	63.849	58.669	54.327	61.677	56.478	61.456	63.655	44.528	34.596
842	54.224	46.568	43.406	63.872	58.59	54.31	61.648	56.315	61.479	63.686	44.437	34.742
842.5	54.354	46.577	43.396	63.914	58.538	54.14	61.418	56.083	61.283	63.483	44.496	34.793
843	54.417	46.533	43.384	63.783	58.56	54.156	61.338	56.071	61.19	63.455	44.52	34.76
843.5	54.205	46.361	43.162	63.645	58.547	54.342	61.409	56.152	61.291	63.444	44.556	34.781
844	54.017	46.27	43.123	63.631	58.439	54.496	61.595	56.234	61.397	63.429	44.655	34.849
844.5	53.967	46.135	43.217	63.768	58.439	54.431	61.678	56.35	61.547	63.398	44.681	34.884
845	54.058	46.003	43.399	63.855	58.612	54.238	61.733	56.433	61.688	63.535	44.728	34.782
845.5	54.012	45.982	43.431	63.883	58.666	54.034	61.644	56.373	61.761	63.538	44.806	34.693
846	53.962	46.079	43.316	63.767	58.463	54.007	61.5	56.319	61.779	63.534	44.681	34.679
846.5	53.889	46.186	43.314	63.685	58.311	54.17	61.377	56.385	61.822	63.623	44.597	34.658
847	54.004	46.305	43.431	63.603	58.222	54.354	61.331	56.396	61.696	63.765	44.7	34.633
847.5	54.171	46.321	43.408	63.569	58.008	54.263	61.402	56.485	61.565	63.781	44.851	34.678
848	54.171	46.251	43.3	63.473	57.825	54.049	61.842	56.734	61.587	63.886	44.816	34.774
848.5	21.048	17.953	16.871	24.761	22.532	21.133	23.901	22.022	23.911	24.733	17.339	13.51

## Sheet: Sheet2
" File:	Users\t4chr\Desktop\spectrometer data qu
" TRANS	-> Wave:564.75nm Pix:1050 Val: 23.124 Time:905ms Avg:3 Sm:1 Sg:0 Tc:off SNAP Xt:3 Ch:1 Xtrig
184	0.001
184.5	0.001
185	0.001
185.5	0.001
186	0.001
186.5	0.001
187	0.001
187.5	0.001
188	0.001
188.5	0.001
189	0.001
189.5	-17.448
190	-8.6506
190.5	5.5054
191	24.223
191.5	30.128
192	25.402
192.5	20.023
193	17.962
193.5	17.83
194	18.265
194.5	19.419
195	18.575
195.5	12.442
196	9.8867
196.5	8.2548
197	6.9827
197.5	11.277
198	12.674
198.5	11.864
199	12.477
199.5	13.647
200	17.894
200.5	21.223
201	19.503
201.5	15.037
202	8.6132
202.5	6.8366
203	13.222
203.5	19.466
204	23.893
204.5	23.199
205	13.837
205.5	4.5533
206	1.7315
206.5	2.0431
207	6.9249
207.5	10.32
208	12.439
208.5	18.574
209	22.454
209.5	22.487
210	20.843
210.5	15.721
211	11.482
211.5	12.746
212	14.068
212.5	16.438
213	20.515
213.5	24.044
214	23.934
214.5	18.65
215	15.337
215.5	12.303
216	11.222
216.5	13.768
217	14.051
217.5	13.291
218	12.735
218.5	13.058
219	13.981
219.5	13.549
220	14.26
220.5	16.215
221	16.652
221.5	18.579
222	19.657
222.5	19.463
223	19.918
223.5	19.449
224	20.212
224.5	20.24
225	20.226
225.5	20.679
226	20.128
226.5	19.283
227	19.184
227.5	18.371
228	17.471
228.5	17.76
229	18.686
229.5	19.641
230	20.52
230.5	20.215
231	19.176
231.5	18.481
232	17.899
232.5	18.024
233	18.385
233.5	18.747
234	18.964
234.5	18.861
235	18.646
235.5	18.498
236	18.442
236.5	18.519
237	18.487
237.5	18.32
238	18.204
238.5	18.063
239	17.974
239.5	17.959
240	17.865
240.5	17.723
241	17.512
241.5	17.285
242	17.102
242.5	16.95
243	16.84
243.5	16.754
244	16.698
244.5	16.656
245	16.634
245.5	16.58
246	16.501
246.5	16.468
247	16.442
247.5	16.406
248	16.38
248.5	16.356
249	16.344
249.5	16.379
250	16.446
250.5	16.488
251	16.52
251.5	16.567
252	16.572
252.5	16.599
253	16.658
253.5	16.704
254	16.783
254.5	16.875
255	16.965
255.5	17.061
256	17.125
256.5	17.173
257	17.231
257.5	17.297
258	17.373
258.5	17.424
259	17.416
259.5	17.406
260	17.428
260.5	17.439
261	17.482
261.5	17.494
262	17.464
262.5	17.441
263	17.4
263.5	17.376
264	17.349
264.5	17.306
265	17.249
265.5	17.191
266	17.188
266.5	17.207
267	17.25
267.5	17.282
268	17.245
268.5	17.233
269	17.2
269.5	17.157
270	17.157
270.5	17.144
271	17.14
271.5	17.119
272	17.083
272.5	17.051
273	17.014
273.5	17.01
274	16.969
274.5	16.911
275	16.888
275.5	16.881
276	16.908
276.5	16.913
277	16.857
277.5	16.784
278	16.722
278.5	16.689
279	16.66
279.5	16.619
280	16.572
280.5	16.542
281	16.551
281.5	16.55
282	16.527
282.5	16.497
283	16.484
283.5	16.496
284	16.508
284.5	16.484
285	16.457
285.5	16.425
286	16.386
286.5	16.363
287	16.337
287.5	16.292
288	16.283
288.5	16.278
289	16.234
289.5	16.21
290	16.182
290.5	16.151
291	16.123
291.5	16.096
292	16.075
292.5	16.058
293	16.026
293.5	15.985
294	15.925
294.5	15.866
295	15.862
295.5	15.887
296	15.922
296.5	15.915
297	15.872
297.5	15.837
298	15.829
298.5	15.857
299	15.884
299.5	15.902
300	15.881
300.5	15.851
301	15.833
301.5	15.823
302	15.826
302.5	15.828
303	15.802
303.5	15.774
304	15.759
304.5	15.775
305	15.796
305.5	15.797
306	15.789
306.5	15.76
307	15.756
307.5	15.766
308	15.785
308.5	15.808
309	15.795
309.5	15.766
310	15.737
310.5	15.72
311	15.723
311.5	15.706
312	15.689
312.5	15.641
313	15.601
313.5	15.572
314	15.56
314.5	15.582
315	15.615
315.5	15.655
316	15.692
316.5	15.715
317	15.669
317.5	15.599
318	15.529
318.5	15.477
319	15.48
319.5	15.516
320	15.504
320.5	15.478
321	15.431
321.5	15.379
322	15.346
322.5	15.325
323	15.315
323.5	15.289
324	15.29
324.5	15.272
325	15.223
325.5	15.213
326	15.205
326.5	15.195
327	15.214
327.5	15.245
328	15.291
328.5	15.379
329	15.44
329.5	15.426
330	15.389
330.5	15.317
331	15.292
331.5	15.296
332	15.305
332.5	15.353
333	15.356
333.5	15.321
334	15.279
334.5	15.251
335	15.237
335.5	15.229
336	15.173
336.5	15.161
337	15.193
337.5	15.244
338	15.261
338.5	15.178
339	15.102
339.5	15.075
340	15.11
340.5	15.146
341	15.179
341.5	15.2
342	15.22
342.5	15.241
343	15.245
343.5	15.276
344	15.287
344.5	15.278
345	15.25
345.5	15.226
346	15.267
346.5	15.298
347	15.343
347.5	15.318
348	15.286
348.5	15.237
349	15.175
349.5	15.148
350	15.128
350.5	15.138
351	15.144
351.5	15.133
352	15.126
352.5	15.123
353	15.129
353.5	15.124
354	15.115
354.5	15.103
355	15.094
355.5	15.106
356	15.1
356.5	15.099
357	15.07
357.5	15.071
358	15.126
358.5	15.169
359	15.169
359.5	15.113
360	15.046
360.5	15.072
361	15.121
361.5	15.134
362	15.104
362.5	15.047
363	15.025
363.5	15.039
364	15.054
364.5	15.09
365	15.124
365.5	15.18
366	15.208
366.5	15.234
367	15.279
367.5	15.351
368	15.31
368.5	15.31
369	15.321
369.5	15.308
370	15.36
370.5	15.305
371	15.21
371.5	15.194
372	15.187
372.5	15.216
373	15.238
373.5	15.253
374	15.321
374.5	15.405
375	15.45
375.5	15.427
376	15.389
376.5	15.341
377	15.407
377.5	15.506
378	15.592
378.5	15.616
379	15.58
379.5	15.537
380	15.545
380.5	15.568
381	15.617
381.5	15.683
382	15.752
382.5	15.852
383	15.862
383.5	15.9
384	15.96
384.5	16.018
385	16.041
385.5	15.969
386	15.898
386.5	15.953
387	16.097
387.5	16.24
388	16.299
388.5	16.284
389	16.278
389.5	16.241
390	16.287
390.5	16.264
391	16.306
391.5	16.359
392	16.343
392.5	16.301
393	16.276
393.5	16.332
394	16.379
394.5	16.507
395	16.629
395.5	16.77
396	16.871
396.5	16.926
397	16.932
397.5	16.932
398	16.945
398.5	16.899
399	16.835
399.5	16.848
400	16.978
400.5	17.113
401	17.118
401.5	16.969
402	16.81
402.5	16.813
403	16.989
403.5	17.175
404	17.234
404.5	17.18
405	17.041
405.5	17.022
406	17.101
406.5	17.259
407	17.344
407.5	17.315
408	17.192
408.5	17.151
409	17.229
409.5	17.261
410	17.244
410.5	17.21
411	17.185
411.5	17.247
412	17.259
412.5	17.132
413	17.089
413.5	17.054
414	17.152
414.5	17.305
415	17.347
415.5	17.246
416	17.057
416.5	16.847
417	16.856
417.5	17.067
418	17.281
418.5	17.41
419	17.391
419.5	17.357
420	17.461
420.5	17.585
421	17.704
421.5	17.798
422	17.712
422.5	17.691
423	17.602
423.5	17.524
424	17.51
424.5	17.498
425	17.473
425.5	17.413
426	17.384
426.5	17.341
427	17.376
427.5	17.424
428	17.47
428.5	17.604
429	17.639
429.5	17.707
430	17.747
430.5	17.727
431	17.765
431.5	17.803
432	17.884
432.5	17.993
433	17.984
433.5	17.856
434	17.742
434.5	17.669
435	17.681
435.5	17.673
436	17.631
436.5	17.631
437	17.614
437.5	17.611
438	17.562
438.5	17.488
439	17.468
439.5	17.441
440	17.476
440.5	17.489
441	17.502
441.5	17.517
442	17.47
442.5	17.456
443	17.448
443.5	17.469
444	17.526
444.5	17.53
445	17.532
445.5	17.481
446	17.481
446.5	17.535
447	17.574
447.5	17.637
448	17.584
448.5	17.535
449	17.494
449.5	17.515
450	17.531
450.5	17.526
451	17.505
451.5	17.441
452	17.51
452.5	17.614
453	17.721
453.5	17.747
454	17.701
454.5	17.704
455	17.768
455.5	17.795
456	17.732
456.5	17.628
457	17.563
457.5	17.552
458	17.527
458.5	17.585
459	17.607
459.5	17.65
460	17.665
460.5	17.707
461	17.797
461.5	17.856
462	17.799
462.5	17.666
463	17.522
463.5	17.43
464	17.497
464.5	17.557
465	17.632
465.5	17.698
466	17.732
466.5	17.777
467	17.747
467.5	17.706
468	17.683
468.5	17.688
469	17.665
469.5	17.62
470	17.647
470.5	17.69
471	17.778
471.5	17.844
472	17.907
472.5	17.89
473	17.815
473.5	17.696
474	17.584
474.5	17.604
475	17.595
475.5	17.626
476	17.655
476.5	17.622
477	17.623
477.5	17.581
478	17.574
478.5	17.668
479	17.791
479.5	17.89
480	17.856
480.5	17.753
481	17.671
481.5	17.665
482	17.705
482.5	17.76
483	17.789
483.5	17.817
484	17.805
484.5	17.767
485	17.731
485.5	17.705
486	17.755
486.5	17.788
487	17.809
487.5	17.754
488	17.729
488.5	17.75
489	17.802
489.5	17.852
490	17.853
490.5	17.81
491	17.772
491.5	17.764
492	17.778
492.5	17.876
493	17.965
493.5	18.076
494	18.12
494.5	18.102
495	18.064
495.5	18.017
496	18.028
496.5	18.067
497	18.152
497.5	18.22
498	18.274
498.5	18.266
499	18.255
499.5	18.256
500	18.257
500.5	18.255
501	18.26
501.5	18.297
502	18.334
502.5	18.358
503	18.385
503.5	18.434
504	18.516
504.5	18.537
505	18.521
505.5	18.542
506	18.568
506.5	18.644
507	18.723
507.5	18.8
508	18.902
508.5	18.982
509	19.041
509.5	19.07
510	19.093
510.5	19.13
511	19.248
511.5	19.358
512	19.424
512.5	19.442
513	19.452
513.5	19.512
514	19.614
514.5	19.726
515	19.823
515.5	19.904
516	19.99
516.5	20.109
517	20.269
517.5	20.407
518	20.528
518.5	20.596
519	20.654
519.5	20.688
520	20.71
520.5	20.773
521	20.893
521.5	21.065
522	21.213
522.5	21.383
523	21.483
523.5	21.581
524	21.642
524.5	21.707
525	21.823
525.5	21.911
526	21.988
526.5	22.07
527	22.154
527.5	22.235
528	22.308
528.5	22.323
529	22.391
529.5	22.424
530	22.472
530.5	22.523
531	22.587
531.5	22.683
532	22.727
532.5	22.786
533	22.832
533.5	22.885
534	22.929
534.5	22.967
535	23.011
535.5	23.068
536	23.031
536.5	23.028
537	23.065
537.5	23.14
538	23.187
538.5	23.188
539	23.191
539.5	23.209
540	23.242
540.5	23.266
541	23.258
541.5	23.247
542	23.223
542.5	23.169
543	23.106
543.5	23.102
544	23.243
544.5	23.397
545	23.439
545.5	23.384
546	23.351
546.5	23.394
547	23.461
547.5	23.469
548	23.45
548.5	23.485
549	23.513
549.5	23.557
550	23.549
550.5	23.546
551	23.554
551.5	23.596
552	23.624
552.5	23.642
553	23.638
553.5	23.62
554	23.574
554.5	23.475
555	23.434
555.5	23.47
556	23.536
556.5	23.583
557	23.588
557.5	23.577
558	23.562
558.5	23.521
559	23.53
559.5	23.535
560	23.511
560.5	23.429
561	23.377
561.5	23.381
562	23.364
562.5	23.328
563	23.219
563.5	23.137
564	23.074
564.5	23.109
565	23.128
565.5	23.143
566	23.064
566.5	22.981
567	22.9
567.5	22.834
568	22.791
568.5	22.759
569	22.753
569.5	22.724
570	22.637
570.5	22.509
571	22.402
571.5	22.397
572	22.439
572.5	22.425
573	22.333
573.5	22.218
574	22.176
574.5	22.176
575	22.204
575.5	22.269
576	22.235
576.5	22.147
577	21.995
577.5	21.869
578	21.835
578.5	21.809
579	21.821
579.5	21.806
580	21.775
580.5	21.735
581	21.69
581.5	21.671
582	21.651
582.5	21.636
583	21.641
583.5	21.664
584	21.706
584.5	21.691
585	21.657
585.5	21.591
586	21.561
586.5	21.513
587	21.558
587.5	21.539
588	21.478
588.5	21.354
589	21.248
589.5	21.22
590	21.209
590.5	21.252
591	21.284
591.5	21.265
592	21.207
592.5	21.203
593	21.259
593.5	21.284
594	21.221
594.5	21.174
595	21.19
595.5	21.233
596	21.203
596.5	21.14
597	21.067
597.5	21.077
598	21.122
598.5	21.176
599	21.205
599.5	21.18
600	21.177
600.5	21.156
601	21.144
601.5	21.121
602	21.072
602.5	21.072
603	21.056
603.5	21.083
604	21.065
604.5	20.983
605	20.941
605.5	20.89
606	20.9
606.5	20.827
607	20.771
607.5	20.769
608	20.81
608.5	20.885
609	20.821
609.5	20.749
610	20.675
610.5	20.617
611	20.554
611.5	20.504
612	20.496
612.5	20.506
613	20.491
613.5	20.472
614	20.483
614.5	20.476
615	20.384
615.5	20.3
616	20.285
616.5	20.338
617	20.379
617.5	20.345
618	20.335
618.5	20.309
619	20.335
619.5	20.303
620	20.248
620.5	20.211
621	20.219
621.5	20.241
622	20.256
622.5	20.261
623	20.291
623.5	20.276
624	20.158
624.5	20.038
625	19.957
625.5	19.985
626	20.036
626.5	20.077
627	20.11
627.5	20.108
628	20.102
628.5	20.064
629	20.071
629.5	20.12
630	20.113
630.5	20.085
631	20.033
631.5	20.022
632	20.007
632.5	19.99
633	19.944
633.5	19.86
634	19.776
634.5	19.753
635	19.808
635.5	19.848
636	19.797
636.5	19.743
637	19.697
637.5	19.687
638	19.717
638.5	19.715
639	19.709
639.5	19.638
640	19.543
640.5	19.468
641	19.391
641.5	19.322
642	19.315
642.5	19.363
643	19.449
643.5	19.46
644	19.423
644.5	19.382
645	19.366
645.5	19.363
646	19.304
646.5	19.268
647	19.225
647.5	19.2
648	19.185
648.5	19.155
649	19.145
649.5	19.085
650	19.033
650.5	19.058
651	19.108
651.5	19.083
652	19.011
652.5	18.907
653	18.886
653.5	18.807
654	18.751
654.5	18.743
655	18.793
655.5	18.867
656	18.925
656.5	18.973
657	18.969
657.5	18.941
658	18.898
658.5	18.88
659	18.792
659.5	18.707
660	18.654
660.5	18.634
661	18.604
661.5	18.536
662	18.544
662.5	18.563
663	18.57
663.5	18.493
664	18.42
664.5	18.42
665	18.458
665.5	18.437
666	18.404
666.5	18.392
667	18.435
667.5	18.474
668	18.462
668.5	18.439
669	18.41
669.5	18.387
670	18.361
670.5	18.31
671	18.249
671.5	18.251
672	18.257
672.5	18.301
673	18.324
673.5	18.374
674	18.363
674.5	18.314
675	18.302
675.5	18.339
676	18.379
676.5	18.385
677	18.36
677.5	18.414
678	18.459
678.5	18.46
679	18.411
679.5	18.37
680	18.382
680.5	18.384
681	18.465
681.5	18.545
682	18.576
682.5	18.555
683	18.598
683.5	18.688
684	18.788
684.5	18.789
685	18.752
685.5	18.71
686	18.774
686.5	18.863
687	18.956
687.5	19.02
688	19.131
688.5	19.236
689	19.382
689.5	19.554
690	19.729
690.5	19.847
691	19.896
691.5	19.984
692	20.101
692.5	20.289
693	20.518
693.5	20.757
694	20.981
694.5	21.179
695	21.363
695.5	21.469
696	21.652
696.5	21.915
697	22.187
697.5	22.442
698	22.709
698.5	23.013
699	23.21
699.5	23.334
700	23.438
700.5	23.62
701	23.916
701.5	24.236
702	24.518
702.5	24.748
703	24.958
703.5	25.166
704	25.359
704.5	25.605
705	25.801
705.5	25.999
706	26.157
706.5	26.317
707	26.406
707.5	26.567
708	26.769
708.5	26.966
709	27.08
709.5	27.208
710	27.429
710.5	27.676
711	27.877
711.5	28.006
712	28.138
712.5	28.322
713	28.493
713.5	28.672
714	28.875
714.5	29.101
715	29.299
715.5	29.451
716	29.532
716.5	29.582
717	29.718
717.5	29.903
718	30.091
718.5	30.221
719	30.399
719.5	30.523
720	30.662
720.5	30.77
721	30.871
721.5	30.933
722	31.039
722.5	31.144
723	31.263
723.5	31.419
724	31.626
724.5	31.744
725	31.776
725.5	31.77
726	31.886
726.5	31.986
727	32.107
727.5	32.187
728	32.277
728.5	32.403
729	32.495
729.5	32.587
730	32.54
730.5	32.626
731	32.688
731.5	32.745
732	32.744
732.5	32.832
733	32.929
733.5	33.03
734	33.142
734.5	33.196
735	33.215
735.5	33.232
736	33.39
736.5	33.509
737	33.562
737.5	33.484
738	33.441
738.5	33.472
739	33.496
739.5	33.455
740	33.445
740.5	33.608
741	33.741
741.5	33.788
742	33.686
742.5	33.672
743	33.719
743.5	33.822
744	33.827
744.5	33.798
745	33.847
745.5	33.948
746	33.944
746.5	33.891
747	33.865
747.5	33.929
748	33.986
748.5	33.995
749	33.986
749.5	34.014
750	34.011
750.5	33.991
751	34.061
751.5	34.155
752	34.264
752.5	34.237
753	34.201
753.5	34.143
754	34.183
754.5	34.218
755	34.258
755.5	34.311
756	34.402
756.5	34.468
757	34.465
757.5	34.368
758	34.3
758.5	34.377
759	34.434
759.5	34.462
760	34.404
760.5	34.376
761	34.344
761.5	34.352
762	34.352
762.5	34.284
763	34.3
763.5	34.368
764	34.382
764.5	34.329
765	34.311
765.5	34.319
766	34.281
766.5	34.29
767	34.381
767.5	34.405
768	34.351
768.5	34.361
769	34.433
769.5	34.485
770	34.416
770.5	34.337
771	34.263
771.5	34.32
772	34.335
772.5	34.409
773	34.498
773.5	34.548
774	34.417
774.5	34.327
775	34.434
775.5	34.587
776	34.577
776.5	34.506
777	34.493
777.5	34.507
778	34.447
778.5	34.399
779	34.393
779.5	34.372
780	34.367
780.5	34.377
781	34.431
781.5	34.482
782	34.538
782.5	34.528
783	34.433
783.5	34.403
784	34.433
784.5	34.448
785	34.429
785.5	34.524
786	34.596
786.5	34.595
787	34.569
787.5	34.636
788	34.692
788.5	34.718
789	34.682
789.5	34.587
790	34.504
790.5	34.443
791	34.492
791.5	34.492
792	34.518
792.5	34.483
793	34.528
793.5	34.555
794	34.584
794.5	34.48
795	34.441
795.5	34.561
796	34.695
796.5	34.717
797	34.668
797.5	34.664
798	34.653
798.5	34.578
799	34.517
799.5	34.534
800	34.61
800.5	34.507
801	34.43
801.5	34.492
802	34.586
802.5	34.558
803	34.452
803.5	34.475
804	34.563
804.5	34.64
805	34.63
805.5	34.636
806	34.544
806.5	34.355
807	34.263
807.5	34.286
808	34.396
808.5	34.558
809	34.62
809.5	34.457
810	34.368
810.5	34.432
811	34.488
811.5	34.5
812	34.575
812.5	34.629
813	34.646
813.5	34.579
814	34.47
814.5	34.384
815	34.433
815.5	34.537
816	34.534
816.5	34.481
817	34.413
817.5	34.426
818	34.517
818.5	34.63
819	34.616
819.5	34.611
820	34.555
820.5	34.61
821	34.648
821.5	34.591
822	34.576
822.5	34.53
823	34.501
823.5	34.541
824	34.655
824.5	34.695
825	34.74
825.5	34.809
826	34.826
826.5	34.641
827	34.36
827.5	34.31
828	34.511
828.5	34.584
829	34.57
829.5	34.606
830	34.584
830.5	34.453
831	34.375
831.5	34.436
832	34.631
832.5	34.752
833	34.773
833.5	34.731
834	34.596
834.5	34.498
835	34.389
835.5	34.451
836	34.517
836.5	34.586
837	34.557
837.5	34.575
838	34.584
838.5	34.659
839	34.724
839.5	34.638
840	34.57
840.5	34.585
841	34.632
841.5	34.596
842	34.742
842.5	34.793
843	34.76
843.5	34.781
844	34.849
844.5	34.884
845	34.782
845.5	34.693
846	34.679
846.5	34.658
847	34.633
847.5	34.678
848	34.774
848.5	13.51
