# Supplementary material for: Tomato yellow leaf curl virus manipulates Bemisia tabaci, MEAM1 both directly and indirectly through changes in visual and volatile cues
Source: PeerJ. 2024 Jul 23;12:e17665. doi: 10.7717/peerj.17665 (PMC11276755; doi:10.7717/peerj.17665)
Supplement: Supplemental Information 6 [file peerj-12-17665-s006.xlsx]

## Sheet: Sheet1
wavelength	1.19.healthy.d19.green1a	1.19.healthy.d19.green1b	1.19.healthy.d19.green1c	1.20.healthy.t1r4.green1a	1.20.healthy.t1r4.green1b	Photo7...1.26.d39.healthy.g1	Photo8...1.26.d39.healthy.g2	tylcv leaves.pre-symp.2.9.21.1a	tylcv leaves.pre-symp.2.9.21.b.1	18.gb1feb17.healthy	19.gb1bfeb17.healthy	20.g1feb16.healthy	21.gb1feb16.healthy	g1a.healthy,tomatoleaves.2.23.21	g1a.healthy,tomatoleaves.2.24.21	g1b.healthy,tomatoleaves.2.24.21	g2a.healthy,tomatoleaves.2.23.21	1g.3.3.21.healthy	1ga.march2.healthy	1gb.3.3.21.healthy	1gb.march2.healthy	g1.3.16.21.healthyleaf	g1.mar24.healthy	g1a.healthy.mar.23	g1b.healthy.mar.23	g1.uninfected.march30th	g1.healthy.march31	g1.healthyleaf.4.13.21	g1.healthyleaf.4.14.21	1g.heaLTHY.4.21	g1.4.27.21.healthy	g1.4.28.21.healthy
184	0.001	0.001	0.001	0.001	0.001	0.00014006	0.00014006	0.001	0.001	0.001	0.001	0.001	0.001	0.001	0.001	0.001	0.001	0.001	0.001	0.001	0.001	0.001	0.001	0.001	0.001	0.001	0.001	0.001	0.001	0.001	0.001	0.001
184.5	0.001	0.001	0.001	0.001	0.001	0.001	0.001	0.001	0.001	0.001	0.001	0.001	0.001	0.001	0.001	0.001	0.001	0.001	0.001	0.001	0.001	0.001	0.001	0.001	0.001	0.001	0.001	0.001	0.001	0.001	0.001	0.001
185	0.001	0.001	0.001	0.001	0.001	0.001	0.001	0.001	0.001	0.001	0.001	0.001	0.001	0.001	0.001	0.001	0.001	0.001	0.001	0.001	0.001	0.001	0.001	0.001	0.001	0.001	0.001	0.001	0.001	0.001	0.001	0.001
185.5	0.001	0.001	0.001	0.001	0.001	0.001	0.001	0.001	0.001	0.001	0.001	0.001	0.001	0.001	0.001	0.001	0.001	0.001	0.001	0.001	0.001	0.001	0.001	0.001	0.001	0.001	0.001	0.001	0.001	0.001	0.001	0.001
186	0.001	0.001	0.001	0.001	0.001	0.001	0.001	0.001	0.001	0.001	0.001	0.001	0.001	0.001	0.001	0.001	0.001	0.001	0.001	0.001	0.001	0.001	0.001	0.001	0.001	0.001	0.001	0.001	0.001	0.001	0.001	0.001
186.5	0.001	0.001	0.001	0.001	0.001	0.001	0.001	0.001	0.001	0.001	0.001	0.001	0.001	0.001	0.001	0.001	0.001	0.001	0.001	0.001	0.001	0.001	0.001	0.001	0.001	0.001	0.001	0.001	0.001	0.001	0.001	0.001
187	0.001	0.001	0.001	0.001	0.001	0.001	0.001	0.001	0.001	0.001	0.001	0.001	0.001	0.001	0.001	0.001	0.001	0.001	0.001	0.001	0.001	0.001	0.001	0.001	0.001	0.001	0.001	0.001	0.001	0.001	0.001	0.001
187.5	0.001	0.001	0.001	0.001	0.001	0.001	0.001	0.001	0.001	0.001	0.001	0.001	0.001	0.001	0.001	0.001	0.001	0.001	0.001	0.001	0.001	0.001	0.001	0.001	0.001	0.001	0.001	0.001	0.001	0.001	0.001	0.001
188	0.001	0.001	0.001	0.001	0.001	0.001	0.001	0.001	0.001	0.001	0.001	0.001	0.001	0.001	0.001	0.001	0.001	0.001	0.001	0.001	0.001	0.001	0.001	0.001	0.001	0.001	0.001	0.001	0.001	0.001	0.001	0.001
188.5	0.001	0.001	0.001	0.001	0.001	0.001	0.001	0.001	0.001	0.001	0.001	0.001	0.001	0.001	0.001	0.001	0.001	0.001	0.001	0.001	0.001	0.001	0.001	0.001	0.001	0.001	0.001	0.001	0.001	0.001	0.001	0.001
189	0.001	0.001	0.001	0.001	0.001	15.698	13.588	0.001	0.001	0.001	0.001	0.001	0.001	0.001	0.001	0.001	0.001	0.001	0.001	0.001	0.001	0.001	0.001	0.001	0.001	0.001	0.001	0.001	0.001	0.001	0.001	0.001
189.5	-220.13	-252.91	-269.3	-264.62	-250.57	86.732	74.686	190.54	155.94	88.601	89.176	88.171	87.165	67.951	59.678	73.9	64.047	-76.107	-59.436	-90.604	-80.456	-424.07	74.317	17.908	147.74	139.97	211.35	-839.95	-896.92	-148.29	-608.86	-182.66
190	-140.31	-190.38	-191.43	-205.97	-181.85	192.88	169.4	-2042.5	-2289.6	148.33	133.57	149.14	134.33	124.15	101.68	122.03	119.8	-29.743	-7.3086	-48.545	-31.259	-224.1	42.498	27.716	17.151	-65.801	-72.731	-333.27	-375.03	-223.2	-157.65	55.819
190.5	-74.08	-93.569	-88.332	-77.362	-122.09	318.98	309.62	-138.41	-134.63	136.37	122.98	136.92	128.11	170.25	136.34	160.79	153.04	-41.374	-30.394	-40.851	-27.438	-80.061	20.437	11.495	14.435	-49.607	-50.38	-52.114	-57.623	-178.74	-36.005	27.467
191	-61.717	-58.662	-55.856	-50.712	-86.859	368.91	347.03	-109.17	-81.346	163.58	153.11	150.05	133.26	199.47	178.1	216.05	191.29	-6.6555	2.8562	-15.034	0.82092	-72.981	23.7	8.4934	52.977	-60.528	-65.611	-33.592	-28.556	-210.81	-33.507	15.472
191.5	-56.962	-52.521	-59.634	-51.767	-75.778	424.66	383.74	-102.57	-85.678	290.43	272.51	269.38	231.8	205.18	202.4	226.29	202.17	2.8506	0.84898	-27.582	5.1233	-83.906	21.909	30.766	50.276	-45.105	-54.119	-34.79	-18.941	301.34	-20.983	17.959
192	-46.48	-43.093	-56.368	-56.608	-57.256	492.84	452.41	-75.742	-74.763	327.09	293.83	290	273.99	203.76	204.34	204.28	207.17	-17.523	-10.194	-44.402	-10.219	-76.055	10.113	33.313	37.745	-40.381	-38.745	-33.343	-16.235	313.06	-79.65	-24.198
192.5	-47.196	-38.416	-61.5	-66.481	-48.779	572.01	544.29	-53.778	-65.479	395.03	344.41	333.44	339.78	198.39	203.7	187.05	208.34	-30.351	-16.06	-49.364	-24.125	-73.883	2.3868	30.575	23.967	-39.903	-27.531	-26.747	-13.811	345.35	-128.67	-65.303
193	-52.439	-36.404	-64.729	-74.532	-44.326	898.52	905.15	-43.643	-61.45	408.67	362.53	336.73	349.7	206.4	207.14	190.4	223.68	-36.747	-17.471	-42.953	-34.921	-76.623	3.5849	27.765	13.148	-41.246	-26.437	-18.105	-14.584	516.62	-101.57	-79.63
193.5	-63.208	-42.453	-71.924	-87.696	-49.537	1533.3	1591.9	-40.324	-58.695	367.54	350.17	312.9	306.18	220.55	204.62	198.66	233.14	-31.433	-15.105	-27.799	-35.557	-80.753	8.5346	23.477	6.3604	-48.233	-33.143	-15.393	-20.103	1527.3	27.117	2.4933
194	-68.666	-51.356	-72.029	-93.793	-56.133	2128.7	2276.4	-46.515	-63.28	358.72	373.63	335.38	316.82	238.25	205.28	214.84	234.8	-24.449	-15.621	-15.069	-33.177	-76.317	14.996	25.095	3.7695	-54.082	-40.774	-17.53	-24.742	-227.37	52.884	37.64
194.5	-66.511	-57.554	-68.983	-89.866	-56.305	1564.1	1717.2	-62.071	-77.114	337.3	374.87	333.85	323.03	257.91	213.88	234.74	241.67	-22.538	-23.454	-14.87	-30.593	-70.844	18.44	32.035	9.3503	-62.078	-51.43	-24.604	-27.794	-648.03	45.999	31.492
195	-67.739	-71.702	-75.028	-89.988	-63.405	830.6	888.19	-85.931	-105.67	334.81	375.89	328.32	317.94	253.55	214.39	233.86	232.05	-21.007	-34.422	-20.737	-30.59	-59.4	13.778	34.379	16.442	-66.254	-50.586	-31.675	-26.012	-401.39	34.293	28.025
195.5	-70.347	-75.837	-77.081	-75.488	-67.577	599.98	600.6	-105.66	-136.21	334.22	367.67	316.71	320.35	235.55	215.19	231.42	220.78	-16.443	-40.584	-28.129	-27.896	-51.056	6.8756	39.041	19.562	-60.433	-37.503	-35.443	-20.662	-829.19	28.485	22.388
196	-80.803	-79.261	-85.96	-70.093	-74.804	499.36	460.64	-129.03	-166.36	294.59	320.39	265.63	283.77	216.31	218.95	230.22	219.31	-9.3216	-36.793	-34.475	-17.866	-52.926	5.4318	42.111	23.59	-49.395	-23.821	-34.692	-14.41	152.67	29.865	17.787
196.5	-83.137	-74.421	-86.552	-66.789	-75.314	483.72	420.04	-138.34	-165.81	258.82	291.67	232.99	244.31	201.13	221.13	237.16	223.44	-4.8717	-25.151	-30.558	-10.41	-50.895	7.3727	37	23.976	-39.752	-15.776	-30.336	-9.2168	674.39	27.814	20.895
197	-82.957	-62.017	-79.397	-57.817	-67.908	527.39	472.36	-125.05	-135.38	238.2	281.68	225.98	232.6	204.2	225.56	252.55	234.03	-0.48696	-12.489	-18.417	-6.308	-50.47	11.822	33.885	24.467	-37.051	-13.156	-27.747	-6.3058	417.02	22.718	28.219
197.5	-79.383	-51.396	-71.898	-55.537	-58.098	575	559.26	-113.93	-112.4	243.55	295.7	246.52	247.57	212.4	229.94	260.16	241.32	5.1792	-2.0674	-9.9739	-6.7073	-52.836	12.803	33.522	26.292	-41.284	-20.494	-24.751	-3.2772	552.57	6.3842	34.664
198	-73.668	-48.666	-66.771	-56.544	-55.361	664.51	663.79	-105.96	-101.58	277.88	328.97	288.25	272.79	211.2	215.3	250.48	230.94	6.6242	3.5339	-7.0015	-12.965	-50.71	12.799	33.788	25.602	-51.287	-36.926	-21.845	-3.1274	1110.7	0.63799	47.585
198.5	-68.611	-52.304	-62.698	-59.799	-55.771	832.15	811.43	-100.94	-101.63	313.89	344.15	312.86	290.5	207.98	190.77	225.55	210.25	7.2134	8.9281	-5.2404	-14.509	-50.768	11.62	33.18	24.525	-61.589	-53.889	-22.112	-6.5645	4273.5	6.5161	59.6
199	-57.305	-53.864	-59.321	-63.401	-51.543	1017.4	924.91	-89.118	-94.995	307.62	305.86	284.19	273.45	196.72	174.16	202.6	190.93	3.6349	13.465	-9.1785	-10.155	-56.309	7.8278	30.028	24.173	-61.824	-63.955	-24.703	-12.305	2055.2	17.11	70.873
199.5	-47.795	-61.553	-64.331	-66.958	-52.987	1134.5	944.01	-81.75	-87.789	296.2	282.29	256.71	251.46	202.74	178.66	205.97	191.74	-2.9834	8.9458	-19.688	-7.0413	-55.73	7.852	28.571	24.031	-48.094	-55.924	-24.774	-16.121	1158.7	34.548	64.702
200	-39.658	-61.993	-66.471	-59.811	-51.128	1834.5	1541.2	-68.529	-69.533	291.19	274.56	241.01	241.09	220.6	197.69	220.1	208.87	0.59426	8.9576	-16.17	-1.0469	-55.58	11.272	27.563	21.265	-34.061	-42.236	-24.55	-16.23	778	35.321	54.943
200.5	-40.231	-54.468	-67.611	-45.546	-50.615	2660.1	2299.3	-54.309	-53.887	291.41	275.05	240.74	249.58	239.86	225.44	240.98	239.88	3.7013	5.8297	-15.344	-0.19444	-53.57	13.1	28.259	21.159	-23.204	-28.401	-22.545	-11.625	690.9	35.714	47.493
201	-45.421	-47.627	-66.541	-35.638	-52.833	1945.1	1746.2	-55.375	-53.266	332.08	324.58	280.57	292.46	275.15	262.69	274.16	286.95	8.6553	2.1326	-18.686	2.3432	-49.995	18.643	32.181	23.153	-20.301	-19.624	-22.841	-9.2673	1245	46.101	34.528
201.5	-54.49	-45.838	-61.839	-38.417	-52.199	1175.7	1119.8	-58.4	-61.817	343.24	347.13	287.39	314.77	292.89	273.94	287.05	312.94	13.119	5.3388	-18.673	7.8042	-51.059	23.948	33.094	24.734	-25.806	-18.487	-27.13	-10.815	4673.3	69.601	28.617
202	-63.701	-44.839	-58.472	-45.161	-47.043	1128.3	1100.5	-56.162	-77.079	337.17	352.21	290.38	326.37	285.87	254.88	265.64	306.2	6.4517	3.2418	-28.961	3.8975	-61.96	20.701	33.713	30.814	-31.216	-18.884	-30.981	-15.716	-817.06	119.43	8.2886
202.5	-71.246	-51.213	-56.144	-56.903	-42.733	929.07	919.41	-60.55	-88.889	363.28	392.53	319.15	357.47	280.34	239.92	246.28	287.97	-1.2344	1.5397	-36.191	-4.972	-68.345	21.52	37.963	34.611	-28.97	-23.846	-30.415	-21.539	-315.85	67.212	-20.222
203	-73.664	-64.459	-57.926	-71.024	-46.203	817.05	818.8	-62.454	-87.445	392.53	429.86	359.22	397.24	261.7	226.95	228.41	260.68	-5.9007	1.5483	-38.231	-16.518	-73.939	23.148	41.768	34.122	-25.119	-31.074	-23.148	-20.779	-261.24	-91.081	-102.3
203.5	-71.001	-72.342	-69.687	-72.596	-53.06	933.79	936.19	-57.731	-72.206	531.32	573.17	502.97	541.95	233.47	213.85	207.2	234.87	-10.035	-2.8204	-39.65	-26.205	-90.031	23.346	41.147	33.363	-22.455	-39.251	-17.397	-17.455	-238.54	-112.47	-118.71
204	-69.455	-74.233	-75.38	-70.367	-58.676	1120.4	1097.5	-70.595	-71.111	733.72	783.49	692.31	749.71	223.34	219.67	202.63	226.62	-9.8936	-12.222	-38.017	-25.571	-96.28	25.982	34.418	28.548	-15.426	-46.938	-12.223	-9.9688	-278	-44.906	-78.004
204.5	-51.204	-59.475	-60.977	-52.55	-49.316	2059	1934.8	-82.288	-75.568	574.57	607.06	530.27	590.44	212.68	222.21	197.46	218.53	-4.5744	-14.533	-35.382	-19.524	-105.37	22.277	22.856	22.336	-18.648	-52.5	-10.587	-6.02	-447.45	14.745	-44.973
205	-30.022	-32.616	-34.079	-22.178	-28.057	-67.043	-164.14	-81.172	-75.779	404.58	422.75	358.83	404.53	212.29	227.97	195.92	222.24	7.326	-13.659	-32.664	-13.331	-108.91	17.34	12.77	17.786	-35.014	-56.437	-14.132	-9.5603	-960.45	86.295	-20.548
205.5	-18.757	-10.913	-11.279	-1.4496	-12.854	-23514	-22501	-74.302	-75.973	325.29	343.78	291.15	309.86	247.69	261.57	216.82	258.3	18.812	-7.8328	-26.092	-6.8873	-88.212	16.742	11.828	17.543	-48.075	-50.674	-15.896	-14.703	3941.3	81.021	-14.983
206	-15.922	-5.2433	-3.9547	3.0581	-9.8631	-2288.8	-2121.5	-58.582	-64.895	322.69	345.02	301.27	294.12	309.86	308.32	262.16	321.29	17.948	1.5565	-19.431	-2.8369	-73.437	15.899	14.574	17.858	-50.093	-37.763	-18.981	-22.397	2859.6	56.59	-0.45193
206.5	-23.304	-10.485	-9.644	-3.0905	-17.887	764.55	829.33	-41.351	-49.654	360.15	371.68	348.16	318.6	393.86	374.68	326.23	412.01	15.732	4.6351	-19.181	-2.911	-64.226	18.366	16.895	18.99	-50.835	-30.478	-23.844	-25.347	-516.61	48.832	8.1319
207	-33.121	-23.699	-24.806	-18.887	-27.662	640.83	766.3	-28.762	-38.089	398.77	404.07	398.58	362.03	410.01	387.87	346.76	429.14	7.2143	7.3206	-16.008	-5.2984	-57.736	12.412	12.965	14.547	-46.066	-29.492	-24.037	-22.805	-195.48	17.436	-0.18776
207.5	-42.866	-37.776	-37.458	-32.851	-37.11	868.87	1063.9	-25.21	-33.252	417.99	413.75	409.16	403.9	353.1	346.48	319.17	384.23	-8.2132	7.0028	-13.949	-11.45	-57.893	-2.5344	6.344	3.825	-42.883	-38.079	-21.851	-18.45	-104.82	4.8646	-5.2692
208	-36.457	-34.013	-31.704	-25.393	-33.051	1366.2	1645.2	-25.144	-30.962	361.08	356.61	346.61	373.15	329.96	342.01	322.54	367.38	-10.207	9.1831	-11.329	-17.067	-58.61	-11.249	7.6931	-0.71695	-55.949	-56.59	-19.316	-16.172	-109.36	19.782	17.994
208.5	-29.571	-31.192	-31.364	-20.748	-25.799	-1670.2	-1505.6	-32.83	-40.662	337.73	353.06	334.91	369.28	327.14	348.67	343.34	351.3	-10.359	12.364	-8.106	-16.983	-59.797	-13.997	10.78	2.0938	-76.265	-71.37	-16.189	-14.68	-184.09	28.364	48.628
209	-40.581	-41.34	-50.872	-32.679	-33.53	-1857.8	-1963.4	-40.779	-53.501	351.75	377.26	354.52	392.22	424.28	451.36	444.84	427.99	-12.434	13.79	-10.368	-17.03	-58.72	-6.9465	15.307	7.9059	-84.28	-68.519	-13.34	-12.572	-306.65	39.534	74.678
209.5	-48.179	-51.569	-73.571	-48.776	-38.172	1575.2	1403.4	-45.128	-62.389	388.56	409.07	391.79	428.46	652.03	703.36	670.7	598.07	-9.1235	12.654	-11.059	-14.794	-57.895	2.4049	14.257	12.448	-80.322	-51.948	-11.009	-10.375	-335.11	35.668	79.23
210	-58.546	-68.533	-98.734	-70.897	-46.734	2761.6	2460.7	-41.852	-62.633	468	454.94	450.58	477.15	798.24	888.12	806.83	726.63	-9.3709	6.3878	-13.074	-12.409	-62.532	11.745	13.146	19.217	-70.699	-39.778	-9.2885	-7.5349	-386.5	31.885	56.491
210.5	-64.132	-80.484	-104.19	-88.406	-49.59	5092.7	4398.2	-27.103	-43.057	462.41	418.77	416.41	431.5	769.38	853.72	742.41	742.75	-10.528	-0.36324	-14.719	-9.1493	-60.242	18.07	13.647	23.014	-47.545	-27.2	-8.1834	-6.2771	-633.29	29.855	27.203
211	-55.101	-71.213	-84.132	-79.031	-43.293	-439.15	-521.65	-20.359	-31.589	423.55	376.99	361.09	364.7	554.99	602.08	516.12	563.7	-10.567	-7.0193	-13.957	-4.5313	-56.096	21.354	14.011	23.207	-34.679	-25.685	-9.0761	-6.6058	-2127	26.219	2.04
211.5	-54.348	-61.244	-69.603	-66.91	-39.589	-5943.9	-5399.3	-23.993	-28.204	369.86	339.39	300.93	309.6	434.27	451.22	388.4	438.72	-12.493	-14.191	-15.114	-2.0692	-47.482	21.837	14.099	23.527	-31.345	-31.999	-10.394	-6.1166	243.11	33.841	-11.043
212	-64.216	-61.119	-65.995	-65.301	-43.084	-3643.3	-3391.9	-36.25	-31.609	328.9	322.47	273.78	276.14	382.09	375.48	331.03	375.64	-13.14	-15.319	-13.433	2.4056	-39.735	17.976	8.2513	17.59	-29.618	-33.345	-10.756	-4.7057	731.42	38.484	-9.9292
212.5	-69.755	-53.376	-62.565	-56.847	-49.63	-2652.3	-2597.6	-51.181	-42.678	363.62	368.35	316.46	315.69	383.06	352.62	327.47	364.96	-7.5909	-10.471	-7.8122	6.503	-37.217	11.777	5.4456	7.5656	-31.686	-33.792	-8.8837	-2.5919	1325.2	50.913	5.2247
213	-74.179	-45.159	-58.337	-49.692	-51.105	-2334	-2268.4	-63.148	-46.068	383.61	396.96	344.06	351.87	418.33	361.16	356.75	378.13	-3.6082	-9.7216	-7.1965	5.5906	-43.224	8.0123	9.3617	5.931	-34.357	-35.426	-6.7956	-0.68673	-10310	57.827	26.924
213.5	-73.664	-43.907	-54.071	-49.595	-55.319	-1911.4	-1765.5	-64.912	-46.712	420.37	442.22	397.47	389.69	412.42	336	353.8	373.42	-2.8246	-7.3091	-12.494	3.389	-53.703	7.3338	14.113	7.449	-37.856	-36.634	-3.4879	0.8591	-4246.2	60.403	49.277
214	-60.916	-38.533	-49.915	-47.314	-52.274	-1745.6	-1558.6	-56.463	-45.09	551.41	588.69	522.96	515.52	449.71	351.15	383.68	419.13	-2.8962	-3.1584	-20.57	1.9267	-55.663	9.2238	22.712	9.7981	-39.141	-37.75	-3.2859	-1.4845	-350.1	75.908	70.413
214.5	-51.179	-34.597	-48.636	-43.522	-44.475	-1478.2	-1298.7	-42.407	-39.647	549.01	586.37	499.92	508.6	519.33	410.23	451.64	505.06	-5.7544	-1.5639	-24.953	-1.2833	-55.738	10.684	29.753	11.982	-41.109	-39.092	-9.16	-4.6508	-271.51	71.443	53.718
215	-43.768	-33.804	-48.497	-36.491	-40.192	-1294.7	-1186.2	-31.062	-37.816	610.54	676.01	533.68	561.23	565.49	474.78	522.6	592.05	-3.3221	4.8978	-16.538	1.2968	-48.194	7.4839	29.676	12.185	-44.806	-36.454	-13.493	-4.4658	-258.67	57.382	43.958
215.5	-42.869	-33.041	-51.563	-32.792	-38.681	-1258.7	-1215	-23.512	-33.283	616.95	739.54	540.98	594.3	773.72	703.2	768.41	862.62	0.58701	13.265	-4.4026	3.8273	-39.734	7.9087	32.112	16.948	-40.575	-26.013	-16.113	-1.7982	-241.98	43.789	49.286
216	-55.871	-38.489	-61.724	-37.882	-46.39	-988.04	-979.22	-18.545	-34.466	406.89	538.63	379.36	421.21	951.23	942.76	1002.9	1066.1	0.702	17.127	0.70459	-1.7226	-34.705	11.63	36.313	27.102	-32.082	-14.818	-15.803	0.85348	-266.61	27.208	52.459
216.5	-74.748	-49.233	-79.214	-51.663	-63.044	-669.86	-682.82	-26.102	-41.894	397.74	564.32	404.55	445.22	897.53	944.37	912.57	945.39	1.5961	20.66	1.6665	-4.9344	-27.419	13.25	33.649	32.624	-25.073	-10.6	-9.965	-0.75256	-699.59	25.002	62.303
217	-88.309	-62.269	-89.394	-68.376	-77.4	-534.24	-543.93	-24.574	-42.05	411.53	579.8	446.72	491.79	715.14	743.05	663.27	701.03	2.4352	20.636	1.6247	-6.0047	-20.799	17.795	31.3	33.888	-18.079	-9.1893	-6.8717	-4.6171	-19945	33.479	59.75
217.5	-89.53	-69.596	-85.433	-72.085	-77.324	-466.3	-458.76	-13.808	-34.214	411.02	527.28	436.08	491.27	509.09	515.63	443.12	480.84	2.9384	13.515	-1.9103	-5.5529	-14.98	25.388	28.93	33.034	-17.762	-10.919	-8.8221	-12.586	-9301.7	38.534	46.148
218	-75.601	-67.205	-68.719	-61.563	-65.761	-380.45	-353.83	-8.1614	-22.518	506.28	574.89	506.08	584.08	397.8	397.73	346.3	381.02	4.7351	6.0664	-2.4015	-2.2433	-13.381	28.275	24.964	30.03	-22.431	-12.498	-13.814	-18.919	503.51	40.163	30.663
218.5	-54.133	-55.973	-44.792	-40.971	-45.961	-401.75	-350.54	-3.1521	-15.021	518.99	520.25	462.99	553.97	351.32	351.21	327.37	360.02	3.4191	-0.29962	-0.46472	-1.2942	-17.84	27.909	26.348	30.627	-33.678	-18.288	-16.339	-16.613	596.19	37.123	17.212
219	-41.491	-42.548	-32.649	-26.319	-33.065	-405.13	-337.85	-5.1277	-15.053	495.12	464.92	410.45	489.09	365.06	365.8	369.51	398.36	1.6556	-1.9778	-1.6706	-3.5927	-23.943	23.7	29.323	32.86	-40.237	-22.63	-13.605	-10.905	749.22	28.178	20.418
219.5	-33.92	-30.468	-26.897	-20.639	-26.489	-449.47	-362	-14.732	-25.922	501.08	441.54	403.53	466.82	457.33	445.95	488.6	502.32	-1.1246	-0.27694	-3.6063	-5.8368	-30.278	16.14	29.582	35.667	-40.779	-25.048	-11.116	-5.8976	1726.6	18.775	28.979
220	-26.962	-20.006	-22.503	-17.544	-19.134	-611.24	-484.16	-25.681	-40.589	483.44	398.88	377.78	429.61	634.79	590.2	672.5	655.1	-1.9253	2.3405	-4.1403	-5.1812	-37.435	13.651	30.304	36.938	-39.785	-26.566	-8.9519	-2.6848	-472.11	14.059	39.318
220.5	-23.074	-16.845	-21.207	-18.3	-14.756	-571.6	-452.09	-34.14	-52.311	445.35	378.46	360.78	385.01	823.39	743.63	827.7	775.79	-1.4881	5.3679	-2.539	-1.9804	-43.281	14.318	31.978	37.159	-35.569	-25.124	-7.1413	1.425	-257.18	10.75	54.01
221	-20.081	-18.394	-22.753	-21.261	-14.443	-527.89	-414.55	-37.652	-58.063	376.24	324.04	303.14	317.35	986.22	877.94	975.08	900.64	-2.4968	4.8331	-4.2719	0.97185	-53.814	16.202	32.616	37.524	-32.602	-25.835	-8.4012	3.1148	-188.61	10.43	55.219
221.5	-17.34	-19.129	-23.089	-21.261	-17.224	-483.2	-383.67	-35.182	-50.031	312.59	280.93	249.03	259.67	786.12	713.78	778.22	735.96	-6.1047	5.3377	-4.4883	-1.9187	-67.469	17.964	34.019	35.401	-26.772	-25.295	-8.4259	5.1077	-186.31	19.934	48.495
222	-20.422	-22.447	-25.287	-22.432	-21.994	-445.81	-377.25	-28.006	-36.971	298.42	273.27	236.26	243.14	614.64	584.44	604.16	613.65	-12.247	6.0092	-2.4983	-6.6554	-65.448	14.443	32.801	30.287	-23.263	-27.968	-8.8707	7.4648	-558.09	28.844	47.296
222.5	-28.641	-29.031	-33.044	-25.157	-31.59	-517.32	-498.96	-25.328	-27.893	276.66	249.98	224.25	236.28	552.26	540.16	548.56	605.45	-17.396	1.5144	-7.6462	-11.152	-46.073	13.982	28.748	23.405	-22.625	-26.988	-11.055	4.4677	1317.4	32.476	48.43
223	-32.798	-32.531	-35.929	-24.348	-35.461	-459.29	-488.37	-25.982	-23.831	283.16	254.9	240.25	251.78	475.28	476.09	466.08	542.43	-21.409	-2.2512	-12.591	-13.071	-29.856	16.545	25.551	17.567	-22.105	-23.636	-10.395	0.42899	423.03	33.583	59.167
223.5	-32.481	-37.544	-37.189	-24.331	-35.068	-363.41	-421.7	-27.31	-25.688	332.11	300.39	296.25	307.74	420.49	431.18	410.56	489.09	-18.994	-7.7979	-13.98	-10.693	-17.961	15.829	21.683	12.723	-26.519	-24.73	-7.4519	-1.3666	419.08	32.946	71.625
224	-25.235	-37.201	-32.703	-19.332	-29.915	-302.76	-366.24	-34.592	-33.539	413.34	394.33	380.67	414.98	342.67	348.76	344.34	406.64	-15.755	-13.554	-13.262	-7.5343	-12.236	19.095	20.113	10.31	-27.489	-20.295	-1.3057	0.19733	659.8	32.278	83.97
224.5	-16.086	-29.851	-25.807	-16.689	-23.339	-303.15	-338.13	-40.457	-44.484	720.63	708.62	633.97	744.11	337.68	327.52	335.55	373.85	-10.251	-9.6592	-6.3598	-2.3397	-15.112	23.942	22.464	13.151	-24.582	-17.943	1.8458	1.992	-2126	36.832	83.893
225	-10.443	-22.175	-21.03	-17.073	-18.294	-359.26	-367.06	-46.238	-49.418	-3559.7	-4060.4	-3223.6	-3760	404.15	372.1	403.78	425.16	-3.351	-4.3472	-0.9985	0.07472	-21.276	24.127	23.443	12.211	-21.079	-17.338	1.1319	4.7705	-170.78	44.057	71.733
225.5	-6.2832	-15.348	-13.492	-12.943	-13.043	-363.48	-351.16	-45.579	-47.952	-3862.7	-4356.5	-3485.5	-4058.9	756.77	654.63	752.16	741.5	1.2715	1.2586	2.465	1.5218	-25.439	24.946	27.751	11.969	-16.207	-14.698	0.20463	6.0526	-81.397	47.338	67.324
226	-5.4086	-11.907	-8.4434	-10.435	-14.012	-258.36	-240.91	-35.525	-38.569	-735	-841.64	-659.41	-734.47	-4464.9	-3723.4	-4293	-4079.6	5.2605	6.8712	2.8886	2.4721	-29.476	24.442	29.457	12.888	-12.344	-12.265	-0.037303	4.944	-56.33	46.238	54.592
226.5	-9.2217	-15.743	-7.3826	-11.332	-19.12	-160.39	-147.8	-27.158	-27.199	-680.47	-771.23	-590.93	-647.46	-936.55	-778.83	-903.31	-867.7	3.5929	7.1439	-1.607	0.39932	-27.969	19.823	28.114	11.778	-10.1	-9.3795	1.6221	5.9181	-48.313	48.238	42.33
227	-11.011	-20.041	-3.4385	-7.7855	-21.694	-100.71	-96.425	-20.681	-20.947	-570.28	-615.91	-466.76	-541.22	-599.55	-509	-597.28	-575.12	1.6342	6.2105	-4.661	-0.97146	-22.391	19.959	31.622	16.422	-9.841	-9.6773	3.6012	7.724	-68.058	52.422	34.817
227.5	-15.6	-23.046	-3.6287	-6.3779	-24.361	-71.899	-74.829	-18.106	-18.766	-604.21	-600.22	-460.47	-577.47	-676.48	-613.1	-695.97	-686	0.16013	6.6356	-6.6082	-1.1391	-17.458	23.679	34.624	22.658	-12.052	-10.057	3.3931	8.6288	-113.15	59.812	40.522
228	-23.386	-22.786	-6.1868	-9.4643	-26.782	-70.791	-73.025	-15.98	-18.814	-421.29	-428.59	-337.27	-414.52	-826.94	-786.36	-852.04	-885.21	0.26372	7.5299	-6.0839	-0.33462	-10.714	26.905	37.773	29.771	-11.593	-9.2357	1.6904	8.7415	-142.93	65.919	47.568
228.5	-25.259	-14.078	-1.6196	-6.4176	-23.082	-72.564	-74.976	-10.301	-15.548	-232.15	-260.56	-207.44	-240.81	-521.33	-514.12	-549.03	-581.11	5.8037	11.46	1.5726	3.1514	-5.5537	29.977	38.944	37.454	-9.4466	-7.476	1.0002	8.4492	-133.94	67.626	52.761
229	-24.207	-6.4967	3.0442	-4.0978	-16.414	-67.594	-73.095	-5.6315	-9.9446	-167.37	-207.69	-169.32	-180.64	-325.87	-335.58	-349.76	-377.68	9.624	15.785	8.2159	8.6109	-2.8534	28.919	36.025	39.576	-6.4025	-2.6065	2.2351	8.1285	-94.365	72.657	59.431
229.5	-21.065	-3.2449	6.4489	-4.2381	-10.31	-56.816	-65.439	-2.5747	-2.4241	-119.34	-167.7	-130.82	-129.79	-195.63	-202.52	-204.31	-230.9	12.715	18.615	12.536	13.933	0.011868	26.53	32.08	37.32	0.65671	3.6202	5.3114	8.8867	-59.063	69.682	56.676
230	-13.856	-3.913	10.222	-2.2971	-4.0417	-38.939	-52.514	-0.19182	5.4815	-87.292	-126.75	-98.43	-88.494	-121.47	-121.84	-126.42	-141.7	15.882	19.632	15.313	17.86	2.5539	25.417	30.011	34.474	8.1678	9.385	8.1234	9.7626	-35.788	59.23	50.87
230.5	-8.1418	-6.25	9.5904	-1.6893	1.1061	-24.07	-39.97	2.6543	9.9994	-64.662	-88.11	-72.532	-60.749	-80.468	-80.331	-82.425	-91.684	16.421	18.621	16.587	19.502	4.6343	27.214	30.902	31.356	12.59	13.061	9.8215	10.392	-20.48	54.063	49.226
231	-3.4715	-3.5608	9.1545	-0.22876	4.8809	-14.222	-28.393	7.9995	14.191	-39.705	-51.451	-41.223	-32.546	-52.087	-51.589	-49.536	-57.922	17.01	18.261	17.534	20.544	7.6781	30.518	32.037	30.474	14.52	15.408	10.489	10.965	-12.753	49.063	50.249
231.5	1.2166	0.76921	9.3108	3.0131	7.6975	-7.1301	-17.51	14.201	18.308	-21.88	-27.473	-20.209	-14.828	-29.834	-29.482	-25.633	-32.631	17.662	18.584	18.413	20.671	10.513	32.056	34.411	32.008	14.527	16.665	10.766	11.339	-10.588	47.973	52.334
232	5.5734	6.8001	9.8492	7.8767	11.702	-2.1393	-7.4314	19.037	20.794	-7.4776	-11.545	-2.9491	-3.7441	-13.288	-14.737	-10.718	-14.056	17.521	19.437	19.834	20.363	12.851	33.271	36.394	32.963	13.79	16.913	11.385	12.148	-7.0924	50.28	53.622
232.5	9.6589	12.209	12.635	12.76	15.018	1.4986	1.9077	21.541	22.348	5.9886	2.1142	10.903	6.0666	-2.9923	-4.0163	-3.6115	-3.4703	18.554	20.949	20.553	20.321	14.794	33.549	36.921	34.043	14.313	17.127	12.352	13.517	-2.1418	49.889	55.889
233	11.926	14.412	14.58	15.388	16.151	5.0874	8.9039	22.463	23.689	15.784	12.133	19.9	12.929	4.9317	4.5565	2.5864	4.9072	20.451	22.202	21.124	20.155	16.181	33.351	37.718	35.031	15.556	17.518	13.246	14.616	4.3862	49.561	58.463
233.5	13.8	15.924	16.272	17.246	16.698	8.6056	13.876	23.258	24.757	22.508	19.413	25.264	19.352	11.039	11.643	8.0123	11.258	22.278	23.694	21.768	20.728	17.508	33.195	37.5	35.315	16.645	17.985	13.964	15.353	11.225	49.805	59.788
234	15.556	17.214	17.565	18.263	16.764	11.784	16.93	24.701	26.029	26.224	24.326	27.82	25.024	15.417	17.331	13.48	15.965	23.667	25.337	22.252	21.644	18.92	32.954	37.418	35.913	17.724	18.964	14.638	15.978	14.616	50.69	60.47
234.5	17.126	19.277	19.364	20.074	18.181	14.56	18.11	26.459	27.797	28.126	27.693	29.872	29.242	18.114	20.969	18.41	20.109	24.242	26.179	23.293	22.192	20.576	32.696	37.8	36.612	19.322	20.508	14.85	16.289	18.146	51.836	58.996
235	18.833	21.779	21.284	22.802	20.46	16.895	19.232	27.946	29.195	30.026	29.946	31.76	32.536	21.031	24.194	21.956	23.438	24.202	26.485	24.168	22.818	21.881	33.055	37.579	37.074	21.006	21.52	14.887	16.379	22.336	52.301	56.351
235.5	19.825	23.956	22.404	24.237	22.171	18.839	20.379	29.064	29.931	31.575	31.836	33.478	34.443	23.764	26.544	24.474	25.72	23.811	26.497	24.697	23.303	23.027	33.539	36.908	36.964	22.263	22.188	15.088	16.553	25.72	52.398	55.38
236	20.257	25.396	23.715	24.9	23.286	20.267	21.478	29.66	30.465	33.34	33.822	35.161	35.724	25.856	28.242	26.207	27.421	23.555	26.414	25.255	23.812	23.842	33.666	36.184	36.51	23.034	22.716	15.265	16.522	27.823	53.4	56.38
236.5	20.777	25.764	24.678	25.208	23.971	21.053	22.415	30.235	30.774	34.693	35.084	36.101	36.771	27.692	29.763	27.66	28.435	23.875	26.595	25.757	24.511	24.051	33.543	35.473	35.916	23.294	22.898	15.429	16.464	28.271	54.884	57.717
237	21.047	25.602	24.942	25.253	24.526	21.501	23.086	30.87	30.832	35.352	35.77	36.823	37.235	28.578	30.482	28.573	28.904	24.332	26.844	26.234	25.104	24.226	33.119	35.121	35.337	23.214	23.044	15.556	16.458	27.504	55.702	58.545
237.5	21.37	25.087	25.229	25.463	25.227	21.703	23.743	31.238	30.933	35.521	36.046	37.323	37.396	29.124	30.917	29.385	29.348	24.909	27.098	26.715	25.51	24.575	32.785	35.015	34.96	23.186	23.246	15.576	16.431	27.312	55.91	58.526
238	21.487	24.563	25.035	25.722	25.606	21.945	24.364	31.406	31.018	35.524	36.172	37.767	37.477	29.757	31.188	29.985	29.781	25.545	27.248	27.049	25.713	25.051	32.754	34.837	34.68	23.262	23.203	15.517	16.516	27.934	54.393	57.908
238.5	21.364	24.207	24.677	25.562	25.286	22.06	24.688	31.378	31.237	35.637	35.884	38.372	37.356	30.533	31.306	30.293	30.284	25.784	27.424	27.129	25.774	25.357	32.814	34.761	34.49	23.365	23.179	15.475	16.508	28.373	52.494	56.946
239	21.442	24.136	24.855	25.342	25.021	22.125	24.766	31.412	31.399	35.723	35.748	38.528	37.671	31.235	31.573	31.037	30.673	25.933	27.728	27.241	25.784	25.648	32.906	34.597	34.248	23.604	23.398	15.424	16.476	28.943	51.67	56.118
239.5	21.576	24.201	24.915	25.149	24.822	22.207	24.58	31.26	31.307	35.941	35.685	38.713	37.929	31.491	32.033	31.723	31.069	26.093	27.908	27.412	25.861	25.807	32.867	34.425	34.006	23.911	23.603	15.36	16.449	29.352	51.306	55.823
240	21.836	24.331	24.936	24.952	24.893	22.188	24.269	31.03	31.102	36.152	35.512	38.826	37.958	31.461	32.462	32.209	31.448	26.134	28.009	27.534	25.904	25.93	32.586	34.176	33.742	24.178	23.87	15.31	16.36	29.476	51.7	55.525
240.5	22.099	24.641	25.037	25.069	25.126	22.249	24.01	30.83	30.682	36.232	35.817	38.662	37.999	31.366	32.683	32.461	31.62	26.352	28.053	27.653	25.989	26.314	32.295	33.851	33.382	24.217	24.005	15.25	16.289	29.734	52.008	55.268
241	22.267	24.809	25.068	25.251	25.111	22.32	23.964	30.732	30.404	36.332	36.124	38.532	37.833	31.243	32.851	32.365	31.749	26.529	28.02	27.702	26.089	26.647	31.892	33.51	33.032	24.129	24.015	15.224	16.248	30.021	52.055	54.837
241.5	22.325	24.752	25.135	25.469	25.09	22.358	23.99	30.819	30.334	36.387	36.529	38.47	37.731	31.353	32.865	32.107	31.817	26.536	27.891	27.604	26.108	26.921	31.417	33.205	32.691	24.053	24.006	15.257	16.276	30.072	52.337	54.496
242	22.402	24.654	25.322	25.691	25.083	22.337	23.927	30.882	30.271	36.529	36.898	38.443	37.632	31.427	32.696	31.808	31.717	26.538	27.772	27.577	26.156	27.078	31.066	33.03	32.267	24.024	23.998	15.242	16.268	30.136	52.289	53.947
242.5	22.428	24.394	25.235	25.625	25.049	22.179	23.749	30.818	30.351	36.541	36.942	38.372	37.359	31.232	32.369	31.564	31.437	26.522	27.668	27.69	26.344	27.015	30.804	32.785	31.929	24.114	24.094	15.21	16.24	29.918	52.361	53.615
243	22.32	24.101	24.875	25.446	24.894	21.986	23.502	30.539	30.303	36.461	36.899	38.29	37.101	31.149	32.094	31.439	31.284	26.557	27.583	27.839	26.459	26.908	30.602	32.469	31.533	24.292	24.187	15.207	16.208	29.495	52.398	53.867
243.5	22.178	24.045	24.585	25.289	24.651	21.778	23.316	30.324	30.127	36.376	36.658	38.136	36.849	31.088	31.922	31.418	31.194	26.631	27.638	27.999	26.568	26.831	30.501	32.174	31.108	24.439	24.268	15.137	16.101	29.139	52.248	53.975
244	22.02	24.046	24.272	25.059	24.378	21.601	23.344	30.253	29.999	36.218	36.316	38.078	36.769	31.126	31.991	31.504	31.169	26.708	27.779	28.111	26.705	26.883	30.386	31.959	30.967	24.492	24.25	15.06	16.038	29.003	51.941	54.142
244.5	21.876	23.993	24.054	24.804	24.172	21.494	23.431	30.168	29.763	36.04	35.952	37.986	36.793	31.302	32.26	31.687	31.356	26.806	27.931	28.191	26.739	27.089	30.193	31.83	30.813	24.467	24.18	14.988	16.01	29.043	51.42	54.125
245	21.701	23.97	24.042	24.546	24.088	21.376	23.494	30.086	29.571	35.914	35.686	37.801	36.767	31.395	32.417	31.767	31.562	26.887	28.012	28.223	26.862	27.372	29.965	31.739	30.72	24.483	24.127	14.909	15.991	29.028	50.868	53.751
245.5	21.403	23.787	23.908	24.292	23.951	21.298	23.514	29.947	29.448	35.729	35.604	37.56	36.748	31.45	32.498	31.775	31.686	26.959	28.045	28.286	27.033	27.607	29.746	31.655	30.732	24.556	24.116	14.884	15.996	29.093	50.338	53.339
246	21.024	23.482	23.64	24.072	23.702	21.259	23.366	29.759	29.347	35.529	35.598	37.267	36.713	31.547	32.533	31.868	31.786	27.034	28.083	28.334	27.165	27.7	29.542	31.494	30.591	24.584	24.189	14.914	15.993	29.088	50.259	53.025
246.5	20.69	23.306	23.424	23.951	23.527	21.265	23.182	29.641	29.33	35.51	35.603	37.161	36.776	31.577	32.475	31.829	31.761	27.082	28.189	28.343	27.264	27.726	29.399	31.315	30.431	24.635	24.289	14.948	15.975	29.043	50.211	52.859
247	20.517	23.152	23.091	23.817	23.373	21.296	23.044	29.569	29.287	35.516	35.561	37.323	36.872	31.594	32.325	31.622	31.57	27.139	28.308	28.416	27.296	27.753	29.337	31.174	30.224	24.666	24.371	14.958	16	29.053	50.137	52.857
247.5	20.453	23.044	22.802	23.595	23.214	21.29	22.936	29.49	29.145	35.525	35.377	37.463	36.846	31.599	32.145	31.403	31.381	27.279	28.442	28.532	27.271	27.798	29.269	31.032	29.962	24.692	24.422	14.944	16.026	28.906	50.288	52.907
248	20.457	22.936	22.706	23.375	23.096	21.26	22.923	29.386	29.023	35.563	35.178	37.469	36.621	31.475	31.94	31.166	31.293	27.398	28.583	28.663	27.267	27.878	29.201	30.781	29.794	24.806	24.466	14.942	16.041	28.889	50.34	52.8
248.5	20.493	22.704	22.657	23.175	22.866	21.146	22.908	29.309	28.936	35.468	35.058	37.276	36.364	31.365	31.843	31.073	31.224	27.413	28.623	28.73	27.271	27.934	29.108	30.553	29.662	24.873	24.47	14.968	16.081	28.908	50.171	52.571
249	20.437	22.509	22.675	23.023	22.605	20.977	22.816	29.215	28.869	35.258	34.931	36.934	36.173	31.239	31.869	31.159	31.218	27.4	28.624	28.8	27.274	27.964	28.973	30.366	29.556	24.867	24.484	15.015	16.099	28.885	49.896	52.133
249.5	20.468	22.473	22.759	23.036	22.445	20.806	22.627	29.112	28.909	35.055	34.871	36.663	36.094	31.049	31.921	31.293	31.215	27.378	28.598	28.903	27.31	28.023	28.825	30.215	29.488	24.857	24.524	15.07	16.12	28.884	49.519	51.479
250	20.464	22.532	22.782	23.127	22.359	20.67	22.394	29.051	28.894	34.847	34.838	36.472	36.136	30.903	31.912	31.309	31.1	27.415	28.546	28.939	27.371	28.032	28.657	30.166	29.323	24.85	24.595	15.124	16.165	28.83	49.335	50.992
250.5	20.364	22.558	22.733	23.158	22.296	20.592	22.199	28.995	28.787	34.725	34.855	36.488	36.123	30.794	31.857	31.233	31.03	27.52	28.542	28.964	27.473	28.048	28.491	30.07	29.104	24.844	24.616	15.175	16.188	28.805	49.254	50.642
251	20.301	22.495	22.675	23.104	22.294	20.568	22.067	29.006	28.677	34.619	34.862	36.549	35.991	30.705	31.815	31.146	30.997	27.584	28.565	28.966	27.535	28.083	28.311	29.915	28.879	24.85	24.508	15.235	16.233	28.781	49.202	50.568
251.5	20.184	22.289	22.556	22.931	22.273	20.561	22.012	29.016	28.543	34.581	34.798	36.571	35.829	30.648	31.754	31.05	30.939	27.581	28.573	28.908	27.529	28.1	28.144	29.76	28.631	24.854	24.347	15.315	16.32	28.718	49.138	50.593
252	20.112	22.073	22.388	22.736	22.203	20.479	21.979	28.916	28.43	34.53	34.733	36.545	35.724	30.58	31.676	30.953	30.863	27.527	28.53	28.877	27.516	28.119	28.051	29.638	28.459	24.886	24.232	15.396	16.411	28.637	48.81	50.553
252.5	20.105	21.956	22.24	22.633	22.186	20.406	21.922	28.761	28.31	34.398	34.597	36.399	35.658	30.505	31.559	30.885	30.768	27.478	28.429	28.855	27.474	28.06	27.935	29.549	28.316	24.916	24.215	15.471	16.515	28.453	48.51	50.382
253	20.055	21.975	22.097	22.675	22.159	20.316	21.804	28.571	28.232	34.298	34.458	36.26	35.581	30.444	31.432	30.791	30.626	27.451	28.338	28.84	27.434	27.939	27.822	29.471	28.182	24.944	24.292	15.543	16.601	28.377	48.241	50.257
253.5	19.981	22.061	22.051	22.787	22.164	20.218	21.659	28.37	28.18	34.176	34.241	36.12	35.433	30.409	31.359	30.699	30.528	27.43	28.318	28.849	27.472	27.848	27.754	29.375	28.06	24.891	24.341	15.63	16.68	28.405	48.056	50.268
254	19.89	22.099	22.026	22.792	22.191	20.139	21.552	28.247	28.095	34.024	33.987	35.953	35.199	30.38	31.311	30.623	30.476	27.407	28.29	28.82	27.484	27.864	27.642	29.263	27.949	24.778	24.259	15.718	16.754	28.418	48.109	50.216
254.5	19.843	22.059	21.966	22.707	22.104	20.045	21.515	28.131	28.03	33.888	33.746	35.802	34.968	30.293	31.202	30.545	30.443	27.343	28.22	28.784	27.372	27.909	27.502	29.11	27.854	24.681	24.133	15.817	16.851	28.604	48.163	50.229
255	19.881	21.98	21.957	22.578	22.001	19.971	21.577	27.995	27.907	33.733	33.531	35.606	34.73	30.207	31.055	30.473	30.42	27.259	28.14	28.704	27.225	27.953	27.375	28.975	27.822	24.582	24.033	15.92	16.962	28.694	48.098	50.165
255.5	19.947	21.928	21.943	22.459	21.872	19.922	21.624	27.886	27.704	33.572	33.457	35.396	34.465	30.126	30.914	30.358	30.358	27.17	28.071	28.585	27.044	27.977	27.235	28.797	27.749	24.471	23.951	16.011	17.066	28.73	48.001	50.075
256	19.997	21.888	21.953	22.451	21.77	19.864	21.561	27.763	27.484	33.464	33.425	35.242	34.224	30.012	30.766	30.235	30.23	27.093	28.019	28.514	26.852	27.946	27.098	28.584	27.576	24.344	23.855	16.092	17.15	28.65	47.762	49.928
256.5	19.955	21.892	21.997	22.504	21.782	19.839	21.429	27.642	27.254	33.416	33.465	35.096	34.086	29.868	30.703	30.132	30.049	27.029	28	28.468	26.761	27.902	27.02	28.452	27.439	24.256	23.745	16.152	17.179	28.491	47.676	49.76
257	19.853	21.839	22.014	22.496	21.763	19.818	21.231	27.534	27.105	33.394	33.468	34.937	34.014	29.726	30.674	29.999	29.888	26.9	27.974	28.397	26.71	27.82	26.938	28.329	27.287	24.172	23.582	16.222	17.215	28.423	47.763	49.519
257.5	19.745	21.752	21.971	22.425	21.702	19.748	21.084	27.412	27.017	33.327	33.423	34.794	34.017	29.587	30.542	29.853	29.733	26.768	27.826	28.268	26.637	27.683	26.83	28.225	27.173	24.117	23.469	16.248	17.222	28.278	47.673	49.153
258	19.664	21.7	21.905	22.338	21.598	19.683	21.009	27.285	26.947	33.12	33.322	34.594	33.971	29.49	30.369	29.784	29.604	26.632	27.66	28.111	26.539	27.562	26.727	28.13	27.091	24.101	23.447	16.27	17.246	28.209	47.492	48.814
258.5	19.594	21.638	21.821	22.198	21.454	19.585	20.955	27.177	26.889	32.871	33.125	34.406	33.821	29.466	30.175	29.737	29.553	26.488	27.531	27.968	26.428	27.486	26.655	27.956	26.956	24.084	23.452	16.313	17.313	28.162	47.239	48.614
259	19.452	21.551	21.65	22.086	21.287	19.473	20.924	27.075	26.784	32.688	32.987	34.238	33.706	29.388	29.99	29.69	29.493	26.424	27.423	27.862	26.371	27.429	26.601	27.816	26.8	24.048	23.459	16.325	17.335	28.011	46.962	48.551
259.5	19.4	21.591	21.593	22.067	21.264	19.434	20.921	27.01	26.7	32.604	32.861	34.149	33.598	29.29	29.838	29.633	29.403	26.383	27.367	27.794	26.345	27.35	26.494	27.694	26.603	24.023	23.451	16.369	17.378	27.996	46.681	48.64
260	19.39	21.653	21.626	22.068	21.321	19.436	20.948	26.959	26.594	32.623	32.747	34.111	33.572	29.184	29.736	29.485	29.298	26.363	27.369	27.748	26.382	27.212	26.395	27.611	26.435	23.951	23.4	16.422	17.423	28.014	46.562	48.759
260.5	19.353	21.635	21.585	22.08	21.33	19.484	20.998	26.911	26.472	32.566	32.649	34.043	33.532	29.047	29.629	29.256	29.178	26.403	27.366	27.695	26.403	27.107	26.231	27.58	26.286	23.836	23.315	16.45	17.418	28.002	46.566	48.7
261	19.374	21.636	21.575	22.127	21.383	19.542	21.017	26.809	26.362	32.37	32.47	33.972	33.407	28.982	29.541	29.108	29.113	26.435	27.318	27.647	26.362	27.018	26.077	27.541	26.13	23.738	23.219	16.478	17.427	28.095	46.539	48.478
261.5	19.349	21.561	21.496	22.106	21.359	19.522	20.928	26.695	26.219	32.116	32.274	33.793	33.227	28.953	29.483	29.007	29.071	26.394	27.213	27.579	26.26	26.959	26.009	27.447	26.038	23.644	23.087	16.526	17.434	28.152	46.509	48.225
262	19.312	21.476	21.421	22.056	21.289	19.477	20.781	26.59	26.115	31.923	32.11	33.605	32.996	28.883	29.458	28.951	29.062	26.284	27.048	27.478	26.061	26.914	25.926	27.316	25.929	23.607	22.988	16.539	17.41	28.22	46.552	48.257
262.5	19.331	21.455	21.421	22.015	21.242	19.414	20.596	26.495	26.059	31.873	32.011	33.492	32.833	28.768	29.42	28.975	28.985	26.151	26.906	27.388	25.905	26.811	25.85	27.137	25.861	23.592	22.939	16.498	17.369	28.226	46.496	48.231
263	19.39	21.384	21.409	21.987	21.202	19.362	20.48	26.5	26.024	31.848	31.948	33.378	32.786	28.574	29.328	28.969	28.81	26.047	26.847	27.284	25.778	26.754	25.706	26.915	25.779	23.536	22.915	16.466	17.346	28.127	46.329	48.2
263.5	19.419	21.279	21.35	21.996	21.1	19.361	20.49	26.467	25.977	31.8	31.861	33.284	32.809	28.365	29.212	28.914	28.65	25.993	26.868	27.193	25.691	26.681	25.543	26.75	25.65	23.509	22.923	16.408	17.327	28.025	46.363	48.257
264	19.434	21.195	21.255	21.992	20.946	19.356	20.569	26.392	25.94	31.677	31.719	33.223	32.833	28.198	29.04	28.841	28.497	25.961	26.914	27.143	25.666	26.59	25.386	26.632	25.542	23.464	22.886	16.371	17.334	27.888	46.236	48.019
264.5	19.444	21.172	21.225	22.017	20.854	19.334	20.669	26.309	25.862	31.466	31.496	33.117	32.764	28.093	28.895	28.674	28.37	25.9	26.891	27.052	25.612	26.482	25.285	26.571	25.411	23.409	22.756	16.378	17.368	27.887	45.979	47.811
265	19.392	21.215	21.263	21.994	20.8	19.291	20.705	26.136	25.717	31.343	31.413	33.044	32.64	28.125	28.76	28.495	28.257	25.805	26.747	26.934	25.496	26.318	25.218	26.519	25.309	23.397	22.626	16.349	17.341	28.02	45.92	47.611
265.5	19.317	21.242	21.261	21.929	20.83	19.229	20.696	25.956	25.576	31.255	31.376	32.981	32.494	28.116	28.656	28.349	28.16	25.684	26.544	26.854	25.367	26.202	25.116	26.451	25.241	23.353	22.516	16.316	17.308	28.088	45.944	47.502
266	19.268	21.244	21.251	21.929	20.922	19.151	20.621	25.826	25.446	31.149	31.37	32.826	32.295	28.079	28.642	28.22	28.103	25.595	26.332	26.762	25.265	26.159	25.05	26.363	25.172	23.245	22.427	16.296	17.296	28.129	45.952	47.629
266.5	19.304	21.286	21.23	21.988	21.021	19.044	20.535	25.69	25.307	31.104	31.358	32.694	32.082	28.039	28.597	28.19	28.118	25.553	26.157	26.707	25.201	26.153	24.961	26.287	25.08	23.063	22.37	16.279	17.28	28.162	46.075	47.894
267	19.383	21.36	21.217	22.063	21.055	18.967	20.476	25.6	25.184	31.05	31.227	32.591	31.885	27.911	28.534	28.142	28.148	25.509	26.09	26.753	25.218	26.121	24.864	26.213	24.997	22.889	22.324	16.312	17.278	28.219	46.287	48.358
267.5	19.482	21.441	21.258	22.167	21.041	18.944	20.414	25.569	25.055	30.942	31.103	32.482	31.76	27.799	28.494	28.096	28.158	25.495	26.061	26.796	25.213	26.067	24.849	26.199	24.984	22.742	22.241	16.35	17.286	28.372	46.313	48.521
268	19.576	21.54	21.287	22.231	21.026	18.956	20.359	25.5	24.926	30.878	30.965	32.395	31.695	27.713	28.459	28.051	28.079	25.47	26.029	26.817	25.148	26.012	24.804	26.158	24.97	22.63	22.126	16.377	17.279	28.455	46.35	48.456
268.5	19.685	21.599	21.301	22.24	21.065	18.977	20.331	25.416	24.855	30.847	30.795	32.291	31.646	27.636	28.462	27.946	27.971	25.375	25.981	26.743	25.049	25.98	24.69	26.059	24.926	22.565	22.055	16.429	17.31	28.414	46.318	48.161
269	19.757	21.613	21.302	22.194	21.176	18.977	20.322	25.322	24.809	30.778	30.666	32.201	31.598	27.59	28.52	27.815	27.875	25.295	25.901	26.593	24.919	25.945	24.56	25.924	24.872	22.507	21.987	16.443	17.316	28.3	46.185	47.777
269.5	19.738	21.562	21.298	22.124	21.285	18.929	20.335	25.264	24.822	30.741	30.579	32.123	31.528	27.59	28.495	27.711	27.785	25.214	25.807	26.458	24.814	25.85	24.363	25.727	24.721	22.445	21.953	16.418	17.29	28.04	46.083	47.586
270	19.655	21.469	21.282	22.087	21.312	18.866	20.408	25.217	24.829	30.655	30.518	32.085	31.48	27.634	28.389	27.681	27.739	25.123	25.731	26.372	24.728	25.702	24.203	25.572	24.536	22.45	21.921	16.389	17.283	27.882	45.957	47.519
270.5	19.519	21.384	21.289	22.029	21.252	18.847	20.457	25.134	24.774	30.527	30.507	31.978	31.44	27.624	28.291	27.684	27.681	25.113	25.697	26.362	24.663	25.548	24.169	25.44	24.385	22.48	21.866	16.36	17.271	27.855	45.88	47.61
271	19.501	21.363	21.283	22.08	21.188	18.849	20.47	25.044	24.686	30.413	30.474	31.756	31.362	27.57	28.098	27.68	27.57	25.108	25.659	26.353	24.62	25.484	24.163	25.349	24.266	22.423	21.796	16.324	17.288	27.873	45.743	47.556
271.5	19.6	21.44	21.301	22.158	21.144	18.886	20.452	24.93	24.541	30.326	30.425	31.617	31.228	27.452	27.94	27.591	27.48	25.086	25.588	26.254	24.566	25.468	24.148	25.324	24.204	22.346	21.712	16.311	17.279	28.055	45.693	47.567
272	19.674	21.499	21.328	22.175	21.2	18.941	20.397	24.812	24.345	30.345	30.343	31.49	31.106	27.29	27.822	27.403	27.444	25.064	25.545	26.13	24.534	25.421	24.118	25.291	24.194	22.222	21.658	16.282	17.228	28.16	45.726	47.652
272.5	19.743	21.562	21.35	22.205	21.308	18.933	20.337	24.787	24.194	30.379	30.257	31.443	31.005	27.155	27.687	27.239	27.436	24.965	25.499	26.02	24.512	25.403	24.004	25.255	24.22	22.131	21.664	16.24	17.168	28.277	45.606	47.594
273	19.735	21.576	21.331	22.203	21.355	18.889	20.298	24.779	24.103	30.325	30.144	31.475	30.892	27.046	27.647	27.124	27.474	24.865	25.439	25.92	24.439	25.33	23.864	25.231	24.221	22.099	21.686	16.193	17.122	28.343	45.362	47.566
273.5	19.677	21.506	21.296	22.191	21.328	18.842	20.289	24.727	24.023	30.296	30.008	31.46	30.81	27.001	27.626	27.065	27.47	24.789	25.454	25.915	24.382	25.24	23.77	25.203	24.212	22.031	21.657	16.188	17.095	28.269	45.012	47.373
274	19.714	21.53	21.35	22.281	21.322	18.802	20.275	24.733	23.997	30.238	29.922	31.491	30.755	26.931	27.553	27.026	27.4	24.747	25.428	25.927	24.304	25.207	23.677	25.186	24.084	21.967	21.605	16.174	17.061	28.24	44.84	47.272
274.5	19.698	21.493	21.404	22.345	21.252	18.818	20.255	24.729	24.001	30.148	29.854	31.476	30.709	26.872	27.486	26.999	27.294	24.742	25.343	25.894	24.193	25.136	23.649	25.152	23.908	21.898	21.52	16.134	17.015	28.18	44.833	47.352
275	19.704	21.487	21.495	22.382	21.246	18.88	20.214	24.685	23.99	30.082	29.784	31.432	30.617	26.793	27.349	27.006	27.163	24.727	25.262	25.819	24.125	25.054	23.611	25.043	23.751	21.859	21.441	16.119	16.955	28.118	44.88	47.301
275.5	19.709	21.54	21.552	22.436	21.284	18.934	20.136	24.63	23.973	29.923	29.716	31.326	30.487	26.699	27.211	27.032	27.075	24.705	25.186	25.749	24.113	24.97	23.522	24.861	23.613	21.819	21.406	16.103	16.893	28.154	44.884	47.152
276	19.671	21.596	21.516	22.508	21.28	18.954	20.108	24.503	23.937	29.759	29.687	31.18	30.351	26.669	27.131	27.038	26.996	24.64	25.084	25.639	24.061	24.939	23.446	24.691	23.655	21.769	21.361	16.121	16.857	28.212	44.735	46.947
276.5	19.72	21.688	21.443	22.63	21.289	18.947	20.124	24.332	23.849	29.623	29.688	31.066	30.234	26.589	27.018	26.984	26.981	24.59	24.988	25.509	23.965	24.948	23.359	24.575	23.735	21.727	21.297	16.142	16.823	28.23	44.636	46.82
277	19.779	21.758	21.348	22.781	21.301	18.906	20.138	24.207	23.717	29.536	29.732	30.951	30.201	26.462	26.923	26.857	26.951	24.564	24.86	25.414	23.854	24.993	23.317	24.547	23.782	21.683	21.228	16.132	16.793	28.131	44.644	46.802
277.5	19.771	21.786	21.278	22.841	21.346	18.828	20.137	24.138	23.612	29.483	29.715	30.909	30.175	26.357	26.872	26.745	26.844	24.523	24.703	25.315	23.64	25.11	23.312	24.557	23.779	21.662	21.195	16.074	16.795	27.902	44.816	46.859
278	19.8	21.804	21.268	22.75	21.365	18.779	20.149	24.061	23.52	29.432	29.673	30.855	30.143	26.278	26.823	26.697	26.731	24.474	24.585	25.244	23.455	25.141	23.27	24.562	23.636	21.626	21.201	16.004	16.796	27.667	44.961	46.93
278.5	19.791	21.784	21.32	22.605	21.366	18.752	20.15	24.057	23.46	29.404	29.601	30.776	30.078	26.234	26.813	26.66	26.596	24.416	24.542	25.234	23.384	25.085	23.224	24.528	23.461	21.558	21.179	15.937	16.784	27.698	45.036	46.945
279	19.772	21.736	21.412	22.436	21.288	18.729	20.156	24.041	23.427	29.393	29.495	30.733	30.008	26.252	26.811	26.687	26.556	24.341	24.524	25.238	23.388	25.026	23.206	24.413	23.321	21.466	21.109	15.871	16.762	27.965	45.27	46.985
279.5	19.779	21.706	21.44	22.293	21.247	18.711	20.15	23.966	23.347	29.406	29.447	30.65	29.939	26.239	26.742	26.694	26.529	24.261	24.467	25.164	23.39	24.917	23.167	24.283	23.222	21.417	21	15.832	16.708	28.163	45.298	46.894
280	19.724	21.656	21.449	22.25	21.209	18.678	20.135	23.904	23.238	29.371	29.382	30.6	29.85	26.212	26.666	26.602	26.473	24.149	24.436	25.061	23.422	24.872	23.107	24.161	23.165	21.416	20.849	15.798	16.654	28.365	45.239	46.522
280.5	19.697	21.653	21.429	22.27	21.163	18.615	20.11	23.811	23.153	29.289	29.239	30.541	29.8	26.163	26.582	26.526	26.403	24.043	24.399	25.004	23.441	24.868	23.059	24.068	23.114	21.372	20.718	15.781	16.604	28.335	45.127	45.974
281	19.675	21.716	21.421	22.285	21.204	18.566	20.08	23.675	23.112	29.142	29.1	30.397	29.813	26.113	26.489	26.445	26.302	23.963	24.345	24.99	23.427	24.816	22.964	24.053	23.046	21.337	20.651	15.772	16.54	28.204	44.842	45.77
281.5	19.67	21.793	21.409	22.346	21.182	18.509	20.03	23.609	23.084	29	28.982	30.245	29.829	26.078	26.407	26.446	26.251	23.922	24.323	24.96	23.421	24.703	22.852	24.059	23.012	21.258	20.6	15.756	16.49	28.329	44.738	45.881
282	19.721	21.828	21.353	22.391	21.177	18.422	19.925	23.584	23.06	28.906	28.855	30.123	29.853	26.021	26.275	26.436	26.189	23.937	24.31	24.977	23.363	24.533	22.78	24.049	23.016	21.146	20.593	15.743	16.456	28.536	44.791	46.219
282.5	19.69	21.782	21.221	22.38	21.182	18.359	19.813	23.546	23.022	28.828	28.79	30.083	29.829	26.023	26.212	26.331	26.092	23.944	24.273	24.957	23.247	24.46	22.728	24.085	23.006	21.126	20.624	15.724	16.452	28.76	44.75	46.649
283	19.745	21.805	21.217	22.497	21.212	18.292	19.785	23.546	23.037	28.851	28.824	30.112	29.72	26.021	26.204	26.252	26.005	23.915	24.308	24.903	23.172	24.467	22.723	24.084	22.969	21.096	20.612	15.741	16.498	28.984	44.532	46.7
283.5	19.837	21.813	21.274	22.548	21.262	18.252	19.778	23.475	23.094	28.819	28.816	30.093	29.558	26.016	26.235	26.146	25.957	23.866	24.315	24.884	23.153	24.474	22.745	24.021	22.892	21.083	20.571	15.762	16.536	28.891	44.396	46.62
284	19.867	21.776	21.238	22.478	21.19	18.286	19.778	23.333	23.132	28.773	28.837	30.027	29.347	26.003	26.306	26.104	25.932	23.799	24.234	24.798	23.16	24.441	22.732	23.924	22.781	21.08	20.496	15.739	16.535	28.623	44.349	46.465
284.5	19.864	21.77	21.161	22.434	21.078	18.37	19.789	23.256	23.105	28.726	28.8	29.935	29.196	25.943	26.308	26.148	25.944	23.701	24.138	24.633	23.123	24.257	22.635	23.729	22.667	21.007	20.402	15.7	16.508	28.362	44.599	46.397
285	19.717	21.643	20.967	22.279	20.981	18.429	19.731	23.148	22.959	28.585	28.629	29.882	29.105	25.835	26.272	26.128	25.925	23.631	24.026	24.458	23.008	24.043	22.55	23.542	22.608	20.906	20.354	15.64	16.462	28.114	44.914	46.428
285.5	19.573	21.507	20.79	22.196	20.888	18.471	19.631	23.065	22.738	28.423	28.45	29.789	29.028	25.716	26.191	25.998	25.849	23.561	23.915	24.307	22.907	23.896	22.465	23.448	22.539	20.786	20.362	15.576	16.427	28.066	45.109	46.476
286	19.453	21.442	20.732	22.198	20.86	18.468	19.542	23.01	22.476	28.221	28.236	29.615	28.913	25.626	26.105	25.861	25.739	23.485	23.787	24.169	22.784	23.826	22.385	23.427	22.479	20.655	20.389	15.537	16.419	27.853	45.044	46.484
286.5	19.346	21.347	20.742	22.118	20.769	18.402	19.446	22.918	22.287	28.074	28.119	29.475	28.774	25.567	26.016	25.738	25.665	23.479	23.746	24.159	22.723	23.806	22.33	23.414	22.391	20.523	20.385	15.525	16.404	27.549	44.846	46.419
287	19.245	21.252	20.742	22.009	20.618	18.352	19.41	22.885	22.211	27.976	28.015	29.356	28.623	25.497	25.907	25.649	25.596	23.426	23.7	24.131	22.666	23.819	22.222	23.388	22.266	20.4	20.336	15.53	16.381	27.424	44.501	46.169
287.5	19.077	21.192	20.662	21.831	20.504	18.286	19.4	22.859	22.217	27.879	27.924	29.27	28.568	25.368	25.737	25.629	25.52	23.363	23.633	24.09	22.561	23.846	22.121	23.281	22.198	20.323	20.257	15.55	16.328	27.378	44.188	45.776
288	18.94	21.061	20.488	21.592	20.412	18.227	19.349	22.798	22.282	27.713	27.854	29.218	28.576	25.281	25.561	25.535	25.45	23.335	23.62	24.128	22.548	23.844	22.086	23.151	22.156	20.285	20.171	15.587	16.269	27.505	44.033	45.465
288.5	18.867	20.902	20.298	21.433	20.385	18.177	19.302	22.758	22.295	27.559	27.717	29.144	28.545	25.203	25.42	25.433	25.348	23.288	23.53	24.102	22.523	23.861	22.027	23.07	22.137	20.267	20.079	15.602	16.241	27.709	43.982	45.301
289	18.871	20.727	20.08	21.327	20.275	18.118	19.238	22.716	22.221	27.473	27.648	29.018	28.489	25.141	25.306	25.339	25.266	23.311	23.454	24.035	22.53	23.856	22.009	23.053	22.069	20.278	19.957	15.571	16.209	27.747	43.974	45.292
289.5	18.84	20.507	19.952	21.264	20.081	18.037	19.207	22.734	22.181	27.392	27.584	28.929	28.349	25.117	25.278	25.308	25.244	23.373	23.463	23.979	22.6	23.843	21.973	23.019	21.937	20.239	19.845	15.523	16.174	27.843	44.024	45.55
290	18.723	20.39	19.944	21.205	19.893	17.957	19.225	22.754	22.129	27.467	27.552	28.861	28.24	25.05	25.305	25.363	25.287	23.43	23.521	23.915	22.675	23.83	21.879	22.927	21.8	20.212	19.827	15.467	16.126	28.005	44.203	45.845
290.5	18.565	20.308	19.942	21.058	19.656	17.857	19.21	22.737	22.048	27.542	27.514	28.742	28.247	25.023	25.326	25.393	25.338	23.455	23.582	23.912	22.731	23.791	21.831	22.85	21.693	20.223	19.904	15.398	16.066	28.188	44.264	46.115
291	18.298	20.268	19.93	20.828	19.489	17.751	19.172	22.709	21.993	27.572	27.411	28.712	28.337	25.055	25.362	25.411	25.315	23.406	23.589	23.996	22.735	23.772	21.787	22.78	21.673	20.243	20.064	15.345	16.035	28.222	44.327	46.327
291.5	18.113	20.292	19.887	20.722	19.484	17.676	19.159	22.629	21.964	27.567	27.323	28.734	28.419	25.071	25.42	25.441	25.243	23.365	23.548	24.102	22.693	23.801	21.796	22.794	21.695	20.272	20.234	15.315	16.029	28.075	44.197	46.215
292	18.001	20.27	19.885	20.696	19.584	17.618	19.156	22.59	21.991	27.511	27.288	28.792	28.482	25.111	25.492	25.476	25.242	23.343	23.521	24.157	22.657	23.853	21.85	22.842	21.743	20.357	20.339	15.302	16.047	27.811	43.905	45.932
292.5	18.022	20.249	19.96	20.77	19.779	17.624	19.179	22.606	22.064	27.475	27.35	28.904	28.472	25.207	25.578	25.537	25.335	23.374	23.511	24.19	22.714	23.89	21.953	22.913	21.783	20.483	20.373	15.309	16.056	27.496	43.641	45.63
293	18.026	20.128	19.947	20.867	19.836	17.666	19.152	22.658	22.125	27.434	27.402	28.954	28.374	25.256	25.659	25.595	25.527	23.443	23.513	24.227	22.873	23.926	22.07	22.97	21.802	20.564	20.294	15.301	16.007	27.463	43.411	45.363
293.5	18.009	19.937	19.91	20.871	19.78	17.697	19.078	22.735	22.12	27.47	27.395	29.034	28.309	25.342	25.729	25.628	25.722	23.482	23.512	24.239	23.011	23.943	22.151	23.026	21.804	20.622	20.175	15.288	15.96	27.433	43.375	45.247
294	17.943	19.709	19.849	20.781	19.622	17.712	19.015	22.785	22.073	27.481	27.334	29.086	28.196	25.397	25.777	25.664	25.788	23.498	23.515	24.284	23.078	23.944	22.187	23.068	21.779	20.608	20.11	15.284	15.906	27.46	43.58	45.325
294.5	17.807	19.522	19.745	20.607	19.468	17.689	18.961	22.816	22.046	27.438	27.258	29.098	28.118	25.292	25.769	25.649	25.653	23.488	23.539	24.363	23.068	23.985	22.162	23.074	21.763	20.573	20.112	15.27	15.862	27.573	43.835	45.463
295	17.763	19.415	19.771	20.423	19.42	17.68	19.009	22.837	22.042	27.462	27.239	29.097	28.15	25.186	25.779	25.604	25.468	23.499	23.611	24.387	23.013	24.06	22.107	23.006	21.761	20.621	20.184	15.269	15.892	27.702	44.001	45.523
295.5	17.685	19.361	19.801	20.265	19.361	17.667	19.047	22.797	22.04	27.505	27.35	29.11	28.219	25.059	25.756	25.59	25.351	23.523	23.662	24.394	23.009	24.139	22.066	22.939	21.766	20.626	20.265	15.265	15.926	27.892	44.056	45.555
296	17.663	19.365	19.834	20.232	19.333	17.632	19.027	22.747	22.105	27.563	27.499	29.069	28.311	24.944	25.681	25.599	25.28	23.548	23.699	24.372	23.091	24.189	21.996	22.895	21.794	20.644	20.288	15.257	15.933	27.854	43.994	45.779
296.5	17.715	19.376	19.898	20.263	19.299	17.588	18.979	22.693	22.17	27.655	27.609	29.033	28.311	24.974	25.62	25.618	25.389	23.576	23.752	24.313	23.158	24.208	21.958	22.8	21.824	20.636	20.264	15.266	15.916	27.703	44	45.812
297	17.829	19.46	20.028	20.386	19.384	17.593	18.938	22.667	22.182	27.659	27.657	28.951	28.253	25.042	25.585	25.685	25.553	23.576	23.791	24.31	23.204	24.166	21.92	22.757	21.826	20.628	20.258	15.246	15.858	27.502	43.941	45.857
297.5	17.944	19.562	20.137	20.482	19.514	17.658	18.93	22.737	22.092	27.556	27.553	28.798	28.194	25.134	25.541	25.712	25.593	23.572	23.82	24.346	23.179	24.149	21.892	22.723	21.842	20.646	20.253	15.198	15.8	27.442	43.63	45.739
298	17.954	19.604	20.067	20.466	19.575	17.752	18.961	22.804	21.949	27.462	27.434	28.726	28.153	25.245	25.538	25.693	25.597	23.521	23.763	24.307	23.072	24.156	21.898	22.669	21.794	20.593	20.225	15.119	15.751	27.487	43.345	45.115
298.5	17.879	19.623	19.998	20.464	19.598	17.816	18.983	22.842	21.793	27.354	27.311	28.604	28.063	25.276	25.601	25.725	25.527	23.468	23.67	24.263	23.01	24.187	21.859	22.673	21.675	20.508	20.186	15.039	15.702	27.585	43.017	44.816
299	17.816	19.588	19.866	20.381	19.498	17.841	18.996	22.772	21.713	27.314	27.188	28.536	27.9	25.234	25.597	25.638	25.43	23.429	23.614	24.227	22.97	24.191	21.796	22.644	21.528	20.472	20.17	15.01	15.655	27.619	42.906	44.739
299.5	17.799	19.536	19.79	20.286	19.412	17.797	18.992	22.687	21.764	27.342	27.106	28.524	27.704	25.142	25.592	25.487	25.381	23.427	23.64	24.204	22.989	24.136	21.732	22.601	21.362	20.442	20.167	15.024	15.649	27.494	43.071	44.806
300	17.799	19.561	19.774	20.25	19.413	17.747	18.943	22.587	21.784	27.293	27.102	28.485	27.569	25.015	25.57	25.478	25.301	23.453	23.745	24.194	23.02	24.08	21.727	22.562	21.288	20.421	20.133	15.067	15.695	27.566	43.166	45.079
300.5	17.82	19.545	19.7	20.174	19.443	17.709	18.908	22.496	21.78	27.195	27.087	28.445	27.556	24.979	25.485	25.425	25.182	23.481	23.794	24.141	23.02	23.994	21.763	22.497	21.271	20.408	20.081	15.093	15.748	27.73	43.555	45.314
301	17.775	19.453	19.606	20.153	19.47	17.675	18.888	22.488	21.746	27.143	27.101	28.417	27.653	25.016	25.41	25.387	25.05	23.51	23.795	24.083	23.04	23.976	21.8	22.428	21.283	20.349	19.982	15.077	15.78	27.739	44.057	45.375
301.5	17.71	19.306	19.576	20.13	19.48	17.653	18.906	22.463	21.659	27.148	27.091	28.349	27.683	25.061	25.398	25.435	25.012	23.516	23.664	24	23.029	23.967	21.8	22.404	21.312	20.312	19.884	15.048	15.766	27.787	44.349	45.382
302	17.676	19.237	19.617	20.057	19.494	17.629	18.917	22.421	21.565	27.162	26.995	28.258	27.649	25.074	25.361	25.442	25.068	23.48	23.483	23.987	23.004	23.91	21.716	22.373	21.305	20.289	19.839	15.029	15.745	27.735	44.335	45.158
302.5	17.678	19.281	19.692	20.05	19.552	17.648	18.93	22.329	21.503	27.21	26.905	28.282	27.593	25.022	25.315	25.409	25.093	23.398	23.394	23.988	22.979	23.867	21.621	22.368	21.252	20.239	19.805	14.988	15.732	27.469	43.925	44.604
303	17.684	19.382	19.792	19.975	19.598	17.689	18.929	22.191	21.481	27.169	26.81	28.255	27.494	24.898	25.269	25.33	25.066	23.267	23.307	23.939	22.888	23.767	21.548	22.345	21.174	20.16	19.748	14.973	15.752	27.513	43.377	44.28
303.5	17.617	19.565	19.834	19.963	19.519	17.707	18.902	22.09	21.502	27.035	26.756	28.217	27.517	24.756	25.168	25.203	24.952	23.162	23.277	23.918	22.818	23.731	21.498	22.263	21.168	20.145	19.728	15.002	15.745	27.605	42.96	44.088
304	17.552	19.66	19.871	20.002	19.437	17.699	18.879	22.029	21.505	26.935	26.673	28.086	27.45	24.686	25.085	25.063	24.866	23.162	23.303	23.882	22.767	23.757	21.498	22.141	21.169	20.131	19.714	15.003	15.71	27.67	42.83	44.105
304.5	17.495	19.61	19.854	19.97	19.295	17.635	18.836	21.979	21.482	26.758	26.557	27.853	27.306	24.637	25.012	24.968	24.845	23.231	23.281	23.864	22.703	23.83	21.506	22.015	21.167	20.069	19.718	15.044	15.706	27.671	43.052	44.429
305	17.637	19.535	19.935	20.014	19.323	17.517	18.745	21.973	21.464	26.618	26.439	27.6	27.155	24.603	25.002	24.972	24.852	23.23	23.292	23.828	22.635	23.94	21.467	21.978	21.149	20.046	19.719	15.068	15.68	27.415	43.251	44.622
305.5	17.816	19.372	19.964	20.02	19.409	17.442	18.67	21.965	21.455	26.469	26.304	27.391	26.974	24.596	25.057	24.965	24.892	23.175	23.316	23.809	22.532	23.947	21.435	21.982	21.053	19.982	19.732	15.053	15.688	27.151	43.377	44.731
306	17.918	19.239	19.936	20.014	19.414	17.411	18.63	21.975	21.432	26.322	26.213	27.379	26.907	24.53	25.14	24.912	24.879	23.065	23.268	23.759	22.496	23.869	21.378	21.963	20.939	19.929	19.728	15.081	15.679	26.959	43.413	44.709
306.5	17.892	19.209	19.88	20.116	19.42	17.428	18.629	21.98	21.371	26.248	26.196	27.357	26.896	24.455	25.144	24.844	24.847	22.984	23.223	23.674	22.516	23.71	21.338	21.913	20.935	19.911	19.71	15.127	15.643	26.997	43.145	44.568
307	17.768	19.229	19.762	20.139	19.42	17.482	18.644	21.913	21.282	26.226	26.255	27.415	26.87	24.414	25.062	24.75	24.789	22.979	23.18	23.656	22.504	23.567	21.303	21.813	20.924	19.861	19.691	15.146	15.614	26.985	42.898	44.291
307.5	17.72	19.315	19.744	20.18	19.46	17.502	18.663	21.796	21.218	26.268	26.293	27.503	26.862	24.367	24.936	24.682	24.658	22.954	23.133	23.617	22.465	23.544	21.254	21.715	20.878	19.783	19.635	15.168	15.584	26.821	42.629	44.119
308	17.686	19.358	19.738	20.151	19.497	17.443	18.674	21.733	21.199	26.237	26.324	27.522	26.863	24.337	24.808	24.642	24.578	22.889	23.108	23.552	22.363	23.557	21.226	21.678	20.809	19.748	19.57	15.141	15.6	26.708	42.35	44.099
308.5	17.643	19.336	19.643	19.977	19.45	17.364	18.662	21.705	21.143	26.198	26.298	27.536	26.912	24.337	24.782	24.672	24.539	22.837	23.049	23.538	22.27	23.563	21.13	21.603	20.657	19.69	19.503	15.081	15.601	26.64	42.254	44.011
309	17.578	19.302	19.547	19.858	19.31	17.306	18.666	21.703	21.052	26.17	26.242	27.507	26.955	24.324	24.752	24.746	24.547	22.779	22.921	23.498	22.187	23.556	21.032	21.514	20.521	19.603	19.418	15.026	15.589	26.677	42.439	44.212
309.5	17.483	19.183	19.392	19.751	19.115	17.312	18.672	21.707	20.949	26.143	26.197	27.477	26.964	24.253	24.662	24.697	24.53	22.728	22.78	23.393	22.111	23.468	20.925	21.462	20.466	19.539	19.305	14.969	15.578	26.754	42.71	44.381
310	17.528	19.116	19.378	19.705	19.033	17.366	18.652	21.649	20.933	26.111	26.128	27.433	26.873	24.186	24.576	24.735	24.476	22.684	22.701	23.312	22.059	23.397	20.779	21.473	20.483	19.505	19.217	14.981	15.552	26.714	42.789	44.371
310.5	17.564	19.096	19.43	19.752	19.014	17.375	18.623	21.642	20.99	26.028	26.064	27.44	26.709	24.142	24.514	24.75	24.433	22.63	22.718	23.246	22.037	23.288	20.718	21.541	20.5	19.505	19.179	14.982	15.54	26.619	42.785	44.397
311	17.538	19.061	19.378	19.729	18.967	17.354	18.581	21.664	21.045	25.931	25.92	27.394	26.568	24.114	24.499	24.644	24.386	22.595	22.783	23.19	22.08	23.124	20.707	21.572	20.445	19.526	19.197	15.004	15.559	26.474	42.483	44.378
311.5	17.474	19.047	19.313	19.68	18.981	17.289	18.508	21.605	21.072	25.818	25.851	27.282	26.494	24.079	24.488	24.582	24.318	22.577	22.835	23.171	22.103	23.017	20.692	21.513	20.371	19.509	19.238	15.036	15.587	26.52	42.348	44.478
312	17.384	19.115	19.237	19.769	18.992	17.22	18.431	21.454	21.071	25.738	25.805	27.155	26.426	23.955	24.432	24.473	24.194	22.563	22.816	23.134	22.071	22.966	20.68	21.471	20.313	19.496	19.228	15.009	15.621	26.573	42.338	44.624
312.5	17.381	19.188	19.208	19.905	19.004	17.17	18.353	21.276	20.966	25.681	25.778	27.029	26.369	23.866	24.306	24.365	24.068	22.524	22.702	23.08	22.011	22.94	20.646	21.414	20.272	19.468	19.185	14.971	15.66	26.54	42.251	44.581
313	17.436	19.251	19.247	20.065	19.125	17.148	18.288	21.141	20.853	25.598	25.774	27.01	26.287	23.788	24.172	24.374	24	22.514	22.582	23.044	21.933	22.939	20.645	21.38	20.265	19.425	19.104	14.922	15.662	26.77	42.324	44.427
313.5	17.411	19.274	19.302	20.211	19.214	17.192	18.356	21.173	20.739	25.526	25.689	27.029	26.179	23.782	24.136	24.399	24.024	22.526	22.49	23.085	21.907	22.935	20.622	21.346	20.228	19.372	19.035	14.882	15.652	26.68	42.316	44.304
314	17.345	19.173	19.33	20.124	19.191	17.273	18.483	21.312	20.63	25.505	25.65	26.983	26.126	23.788	24.167	24.359	24.104	22.531	22.438	23.148	21.876	22.862	20.574	21.221	20.171	19.318	18.988	14.869	15.633	26.622	42.277	44.222
314.5	17.305	19.086	19.387	20.093	19.205	17.329	18.622	21.342	20.559	25.545	25.616	26.881	26.097	23.74	24.272	24.353	24.183	22.524	22.442	23.097	21.805	22.796	20.487	21.097	20.063	19.283	18.962	14.88	15.614	26.679	42.19	44.185
315	17.281	19.096	19.474	20.113	19.213	17.327	18.678	21.242	20.468	25.577	25.545	26.697	26.069	23.686	24.311	24.306	24.151	22.445	22.435	22.995	21.772	22.771	20.414	20.961	19.967	19.223	18.904	14.872	15.593	26.439	41.98	44.2
315.5	17.324	19.047	19.467	20.086	19.255	17.303	18.634	21.035	20.367	25.558	25.446	26.542	26.058	23.65	24.265	24.233	24.1	22.354	22.42	22.89	21.737	22.691	20.433	20.811	19.88	19.132	18.857	14.858	15.553	26.479	41.783	44.094
316	17.362	18.989	19.377	20.098	19.285	17.27	18.544	20.842	20.244	25.504	25.24	26.498	26.042	23.681	24.167	24.173	24.028	22.258	22.418	22.824	21.734	22.649	20.516	20.738	19.848	19.011	18.822	14.855	15.52	26.444	41.522	43.868
316.5	17.327	18.95	19.241	19.995	19.227	17.298	18.472	20.774	20.218	25.379	25.087	26.465	26.02	23.758	24.059	24.095	23.973	22.169	22.343	22.796	21.79	22.661	20.551	20.736	19.867	18.979	18.798	14.858	15.488	26.48	41.527	43.608
317	17.326	18.867	19.094	19.818	19.1	17.334	18.482	20.81	20.213	25.243	25.001	26.4	25.957	23.793	23.924	24.028	23.919	22.136	22.301	22.771	21.807	22.683	20.519	20.773	19.87	19.006	18.798	14.867	15.46	26.544	41.494	43.323
317.5	17.324	18.849	19.108	19.724	18.977	17.344	18.538	20.908	20.241	25.204	24.968	26.293	25.86	23.833	23.813	23.979	23.829	22.128	22.319	22.739	21.8	22.772	20.42	20.855	19.883	19.066	18.778	14.858	15.447	26.581	41.399	42.993
318	17.267	18.768	19.208	19.639	18.945	17.316	18.531	20.959	20.241	25.173	24.983	26.196	25.72	23.746	23.695	23.871	23.712	22.104	22.283	22.645	21.737	22.775	20.304	20.889	19.879	19.054	18.732	14.807	15.422	26.574	41.295	42.845
318.5	17.179	18.699	19.268	19.58	18.914	17.26	18.479	20.93	20.199	25.164	24.958	26.22	25.613	23.619	23.614	23.798	23.638	22.114	22.283	22.627	21.669	22.699	20.288	20.869	19.932	18.984	18.68	14.784	15.42	26.419	41.11	42.743
319	17.092	18.71	19.356	19.606	18.953	17.182	18.429	20.844	20.19	25.195	24.881	26.324	25.534	23.546	23.638	23.773	23.609	22.186	22.223	22.633	21.684	22.554	20.323	20.813	19.969	18.899	18.627	14.779	15.409	26.461	41.074	42.611
319.5	17.111	18.817	19.4	19.652	18.985	17.092	18.429	20.723	20.106	25.172	24.814	26.404	25.426	23.535	23.713	23.812	23.629	22.23	22.112	22.697	21.653	22.473	20.351	20.721	19.906	18.811	18.571	14.767	15.38	26.56	41.075	42.822
320	17.196	18.993	19.422	19.768	18.991	16.992	18.454	20.64	20.067	25.163	24.774	26.389	25.314	23.562	23.816	23.868	23.599	22.24	22.053	22.728	21.622	22.439	20.387	20.656	19.813	18.746	18.535	14.771	15.337	26.773	41.099	42.898
320.5	17.326	19.122	19.434	19.84	19.036	16.907	18.454	20.601	20.022	25.106	24.713	26.246	25.208	23.506	23.812	23.835	23.539	22.205	22.031	22.692	21.619	22.459	20.357	20.654	19.721	18.685	18.54	14.761	15.258	26.893	41.143	42.85
321	17.385	19.169	19.333	19.851	19.007	16.889	18.371	20.576	19.977	24.956	24.6	26.029	25.148	23.37	23.721	23.755	23.513	22.099	22.026	22.614	21.595	22.532	20.295	20.662	19.708	18.64	18.588	14.746	15.219	26.738	41.112	42.589
321.5	17.287	19.169	19.253	19.87	18.958	16.939	18.248	20.523	19.937	24.797	24.513	25.856	25.163	23.202	23.59	23.66	23.493	22	22.007	22.478	21.645	22.571	20.251	20.667	19.724	18.587	18.605	14.739	15.202	26.418	41.066	42.27
322	17.147	19.111	19.199	19.838	18.945	17.003	18.174	20.443	19.852	24.588	24.425	25.773	25.17	23.044	23.472	23.606	23.485	21.864	21.957	22.385	21.681	22.596	20.159	20.609	19.729	18.505	18.571	14.716	15.211	26.126	40.845	41.955
322.5	17.007	19.064	19.192	19.878	18.945	17.052	18.173	20.425	19.747	24.493	24.384	25.722	25.214	23.064	23.43	23.619	23.472	21.711	21.9	22.291	21.601	22.616	20.076	20.536	19.702	18.427	18.464	14.631	15.23	25.889	40.473	41.701
323	16.985	19.067	19.235	19.932	18.98	17.016	18.183	20.417	19.66	24.51	24.46	25.711	25.227	23.122	23.438	23.664	23.462	21.579	21.905	22.217	21.455	22.521	19.993	20.477	19.565	18.392	18.323	14.526	15.25	25.78	40.099	41.623
323.5	17.033	19.081	19.318	19.957	19.1	16.983	18.232	20.438	19.628	24.586	24.518	25.775	25.244	23.106	23.436	23.634	23.487	21.561	21.98	22.184	21.384	22.403	19.9	20.501	19.438	18.42	18.236	14.46	15.259	25.671	39.914	41.64
324	17.104	19.122	19.341	19.996	19.229	16.97	18.294	20.442	19.644	24.567	24.507	25.79	25.219	23.108	23.454	23.542	23.492	21.679	22.052	22.197	21.373	22.304	19.83	20.518	19.353	18.472	18.198	14.465	15.27	25.391	39.882	41.711
324.5	17.192	19.225	19.408	20.014	19.256	17.023	18.36	20.418	19.678	24.492	24.461	25.792	25.102	23.009	23.467	23.469	23.422	21.78	22.066	22.267	21.372	22.201	19.815	20.472	19.326	18.519	18.236	14.522	15.265	25.309	39.982	41.711
325	17.191	19.273	19.439	20.012	19.183	17.066	18.414	20.361	19.664	24.496	24.391	25.808	25.054	22.951	23.454	23.343	23.316	21.835	22.003	22.326	21.338	22.167	19.832	20.388	19.338	18.524	18.284	14.569	15.223	25.232	40.334	41.667
325.5	17.203	19.312	19.457	20.041	19.083	17.08	18.43	20.302	19.645	24.509	24.378	25.75	24.971	22.98	23.439	23.276	23.269	21.781	21.851	22.291	21.235	22.13	19.887	20.242	19.361	18.592	18.313	14.599	15.164	25.343	40.616	41.466
326	17.24	19.344	19.507	20.101	19.055	17.06	18.407	20.224	19.613	24.536	24.366	25.76	24.905	23.025	23.398	23.245	23.312	21.664	21.774	22.221	21.184	22.135	19.906	20.12	19.287	18.642	18.255	14.619	15.119	25.608	40.664	41.431
326.5	17.206	19.293	19.547	20.142	19.032	17.011	18.341	20.147	19.578	24.519	24.414	25.774	24.851	23.021	23.337	23.164	23.377	21.588	21.754	22.18	21.233	22.159	19.833	20.023	19.176	18.683	18.161	14.617	15.138	25.798	40.406	41.547
327	17.156	19.244	19.584	20.089	19.064	16.967	18.233	20.089	19.545	24.31	24.41	25.64	24.744	22.91	23.228	23.174	23.341	21.525	21.748	22.094	21.32	22.212	19.768	19.976	19.125	18.723	18.09	14.594	15.176	25.809	39.962	41.548
327.5	17.069	19.144	19.485	19.891	18.96	16.887	18.091	20.039	19.484	24.182	24.289	25.482	24.618	22.751	23.075	23.223	23.2	21.497	21.713	22.082	21.39	22.312	19.729	19.949	19.078	18.624	18.044	14.536	15.224	25.663	39.621	41.502
328	16.967	19.015	19.389	19.704	18.83	16.824	17.951	20.009	19.399	24.171	24.242	25.322	24.581	22.542	22.901	23.185	22.98	21.492	21.651	22.093	21.379	22.319	19.711	19.924	19.034	18.499	18.024	14.475	15.211	25.366	39.612	41.5
328.5	16.885	18.88	19.248	19.601	18.832	16.766	17.882	19.958	19.245	24.159	24.118	25.215	24.582	22.385	22.77	23.104	22.804	21.504	21.56	22.117	21.315	22.207	19.743	19.934	19.045	18.365	18.025	14.448	15.14	25.34	39.661	41.238
329	16.847	18.794	19.136	19.728	18.779	16.72	17.868	19.901	19.126	24.134	24.075	25.243	24.677	22.324	22.734	22.94	22.737	21.548	21.481	22.196	21.217	22.073	19.672	19.96	19.044	18.209	17.997	14.471	15.086	25.437	39.584	41.074
329.5	16.846	18.823	19.034	19.96	18.805	16.695	17.882	19.86	19.06	24.002	24.067	25.263	24.754	22.301	22.711	22.822	22.747	21.565	21.451	22.207	21.101	21.932	19.589	20.02	19.057	18.17	18.046	14.519	15.059	25.518	39.626	40.986
330	16.846	18.863	18.95	20.137	18.863	16.689	17.885	19.864	19.062	23.843	23.967	25.15	24.695	22.357	22.717	22.828	22.746	21.519	21.411	22.125	21.011	21.837	19.529	20.096	19.041	18.199	18.125	14.579	15.087	25.522	39.547	40.977
330.5	16.828	18.886	18.933	20.166	18.814	16.721	17.858	19.899	19.104	23.758	23.83	24.987	24.53	22.438	22.66	22.884	22.706	21.431	21.429	22.029	20.935	21.887	19.448	20.166	18.962	18.248	18.198	14.615	15.115	25.171	39.421	40.931
331	16.882	18.907	18.933	20.104	18.834	16.745	17.86	19.874	19.124	23.842	23.692	24.902	24.399	22.519	22.639	22.872	22.634	21.367	21.478	21.952	20.942	21.927	19.391	20.101	18.883	18.344	18.207	14.609	15.121	24.871	39.422	40.873
331.5	16.966	19.008	19.07	20.058	18.839	16.754	17.863	19.805	19.121	23.894	23.589	24.847	24.363	22.565	22.687	22.816	22.607	21.385	21.478	21.942	20.979	21.911	19.321	20.035	18.87	18.422	18.128	14.595	15.115	24.571	39.386	40.69
332	16.969	19.07	19.139	19.999	18.736	16.656	17.854	19.687	19.043	23.802	23.544	24.855	24.29	22.526	22.642	22.672	22.59	21.46	21.448	21.943	21.056	21.889	19.271	19.965	18.907	18.414	17.992	14.536	15.084	24.481	39.478	40.388
332.5	17.026	19.161	19.113	20.019	18.724	16.561	17.808	19.637	19.013	23.648	23.586	24.867	24.225	22.476	22.624	22.535	22.569	21.495	21.375	21.909	21.105	21.791	19.318	19.884	18.934	18.321	17.84	14.495	15.113	24.325	39.657	40.499
333	16.998	19.112	19.083	19.969	18.707	16.539	17.762	19.625	18.946	23.511	23.616	24.738	24.064	22.394	22.574	22.532	22.477	21.454	21.326	21.869	21.032	21.651	19.365	19.836	18.918	18.211	17.714	14.471	15.126	24.216	39.688	40.588
333.5	16.88	18.951	19.034	19.803	18.642	16.627	17.756	19.584	18.808	23.455	23.625	24.684	23.867	22.351	22.539	22.59	22.427	21.354	21.311	21.807	20.944	21.577	19.391	19.756	18.838	18.131	17.652	14.458	15.143	24.161	39.587	40.729
334	16.843	18.934	19.114	19.764	18.651	16.757	17.836	19.554	18.719	23.395	23.629	24.564	23.788	22.32	22.61	22.692	22.489	21.24	21.24	21.737	20.786	21.562	19.429	19.693	18.8	18.151	17.6	14.444	15.164	24.042	39.422	41.01
334.5	16.734	18.895	19.182	19.72	18.612	16.825	17.897	19.479	18.616	23.329	23.551	24.498	23.736	22.273	22.68	22.698	22.506	21.192	21.171	21.684	20.638	21.591	19.439	19.693	18.766	18.219	17.581	14.451	15.148	24.206	39.126	40.985
335	16.616	18.888	19.174	19.706	18.609	16.822	17.939	19.443	18.608	23.216	23.46	24.48	23.752	22.257	22.67	22.569	22.516	21.197	21.112	21.606	20.56	21.619	19.475	19.707	18.774	18.241	17.575	14.468	15.137	24.354	38.777	40.879
335.5	16.653	18.874	19.161	19.711	18.709	16.787	17.95	19.493	18.723	23.205	23.39	24.427	23.882	22.215	22.624	22.519	22.347	21.202	21.036	21.533	20.508	21.666	19.487	19.69	18.801	18.189	17.499	14.49	15.116	24.48	38.7	40.881
336	16.756	18.922	19.097	19.704	18.772	16.787	17.96	19.462	18.777	23.269	23.282	24.423	23.903	22.163	22.488	22.464	22.145	21.183	21.003	21.485	20.495	21.586	19.429	19.625	18.73	18.108	17.443	14.52	15.097	24.516	38.616	40.751
336.5	16.888	18.95	19.045	19.715	18.774	16.823	17.981	19.424	18.811	23.332	23.232	24.369	23.862	22.066	22.281	22.471	22.019	21.175	20.962	21.466	20.508	21.448	19.34	19.522	18.63	18	17.445	14.565	15.125	24.513	38.699	40.682
337	16.993	18.945	19.066	19.88	18.652	16.787	17.925	19.401	18.716	23.37	23.151	24.388	23.699	21.925	22.062	22.528	21.992	21.124	20.927	21.487	20.512	21.357	19.248	19.476	18.537	17.851	17.456	14.604	15.139	24.561	38.65	40.513
337.5	16.964	18.887	19.053	20.003	18.474	16.68	17.764	19.361	18.624	23.46	23.118	24.443	23.55	21.859	21.999	22.516	22.057	21.117	20.938	21.539	20.459	21.222	19.188	19.473	18.449	17.801	17.531	14.583	15.118	24.562	38.384	40.375
338	16.915	18.774	19.05	19.951	18.441	16.546	17.576	19.316	18.559	23.573	23.157	24.481	23.531	21.813	22.033	22.448	22.104	21.075	20.932	21.534	20.355	21.147	19.162	19.52	18.456	17.768	17.597	14.531	15.045	24.374	38.36	40.498
338.5	16.87	18.842	19.129	19.867	18.598	16.484	17.487	19.268	18.533	23.567	23.129	24.509	23.501	21.796	22.165	22.44	22.121	20.968	20.829	21.402	20.246	21.151	19.141	19.587	18.514	17.826	17.591	14.424	14.999	24.154	38.551	40.55
339	16.87	18.972	19.119	19.706	18.748	16.476	17.478	19.185	18.563	23.447	23.008	24.41	23.506	21.785	22.196	22.362	22.185	20.895	20.77	21.232	20.145	21.169	19.095	19.569	18.512	17.904	17.534	14.309	14.989	24.091	38.818	40.761
339.5	16.869	19.117	19.058	19.668	18.918	16.525	17.515	19.036	18.534	23.235	22.875	24.329	23.463	21.736	22.098	22.297	22.232	20.846	20.745	21.076	20.074	21.168	19.021	19.565	18.558	17.841	17.365	14.318	15.03	24.327	39.13	40.973
340	16.785	19.105	18.979	19.698	18.92	16.506	17.347	18.99	18.485	23.084	22.805	24.288	23.385	21.64	21.914	22.258	22.225	20.851	20.799	21.014	20.074	21.189	18.879	19.511	18.505	17.795	17.23	14.386	15.061	24.798	39.217	41.137
340.5	16.725	19	18.897	19.71	18.836	16.406	17.175	18.96	18.351	23.038	22.776	24.26	23.393	21.572	21.729	22.208	22.135	20.909	20.853	21.078	20.134	21.205	18.827	19.449	18.417	17.765	17.198	14.495	15.069	25.438	39.205	41.325
341	16.685	18.904	18.882	19.781	18.879	16.325	17.083	18.972	18.208	23.024	22.787	24.258	23.333	21.496	21.635	22.102	21.94	20.918	20.791	21.109	20.21	21.248	18.824	19.419	18.387	17.809	17.291	14.584	15.049	25.688	39.127	41.277
341.5	16.598	18.816	18.925	19.818	18.859	16.31	17.128	19.066	18.213	22.947	22.701	24.152	23.204	21.527	21.694	22.032	21.885	20.861	20.741	21.055	20.288	21.235	18.824	19.328	18.273	17.884	17.43	14.589	15.009	25.689	39.078	40.993
342	16.59	18.851	19.053	19.949	18.882	16.357	17.296	19.082	18.217	22.81	22.541	24.057	23.134	21.602	21.809	22.02	21.959	20.834	20.695	21.041	20.334	21.218	18.853	19.238	18.173	17.855	17.424	14.587	14.97	25.752	38.941	40.656
342.5	16.597	18.931	19.104	20.086	19.017	16.413	17.453	19.084	18.198	22.762	22.446	23.93	23.092	21.617	21.98	22.029	22.075	20.84	20.725	21.031	20.316	21.18	18.868	19.196	18.137	17.751	17.27	14.569	14.928	25.858	38.897	40.418
343	16.561	19.003	19.055	20.093	19	16.378	17.436	19.035	18.118	22.8	22.452	23.791	23.169	21.544	22.081	22.064	22.196	20.938	20.809	21.148	20.359	21.121	18.855	19.224	18.178	17.685	17.111	14.522	14.913	25.911	38.8	40.379
343.5	16.601	19.067	19.009	20.068	18.95	16.277	17.427	18.943	17.991	22.885	22.487	23.7	23.324	21.442	22.032	22.143	22.189	20.991	20.781	21.304	20.387	21.124	18.897	19.306	18.268	17.71	17.06	14.504	14.951	25.698	38.718	40.295
344	16.56	19.03	18.859	20.011	18.804	16.164	17.361	18.841	17.91	22.938	22.448	23.609	23.35	21.422	22.104	22.25	22.206	20.949	20.674	21.406	20.372	21.054	18.946	19.397	18.324	17.746	17.118	14.483	15.01	25.08	38.807	40.249
344.5	16.559	18.884	18.821	19.987	18.547	16.11	17.278	18.693	17.833	22.919	22.385	23.635	23.269	21.357	22.1	22.279	22.102	20.811	20.538	21.439	20.242	20.955	18.961	19.315	18.316	17.736	17.189	14.466	15.06	24.231	39.135	40.293
345	16.61	18.836	18.853	20.037	18.413	16.062	17.248	18.551	17.733	22.899	22.318	23.792	23.206	21.354	22.035	22.311	22.015	20.682	20.39	21.388	20.064	20.858	18.983	19.14	18.208	17.627	17.203	14.46	15.07	23.83	39.296	40.008
345.5	16.648	18.903	18.887	20.041	18.337	16.036	17.192	18.494	17.686	22.829	22.319	23.938	23.119	21.313	22.007	22.218	21.943	20.65	20.366	21.269	19.998	20.822	18.971	18.974	18.066	17.475	17.138	14.481	15.046	23.843	39.28	39.7
346	16.704	19.028	18.884	20.013	18.348	16.1	17.181	18.461	17.669	22.659	22.367	24.039	23.053	21.271	21.84	22.097	21.79	20.715	20.373	21.175	19.983	20.791	18.842	18.856	17.95	17.4	17.082	14.514	14.977	23.958	39.172	39.556
346.5	16.657	19.198	18.898	19.974	18.435	16.174	17.167	18.464	17.712	22.456	22.423	24.01	23.052	21.345	21.724	22.087	21.773	20.732	20.335	21.057	20.005	20.743	18.686	18.865	17.846	17.425	17.108	14.556	14.895	24.178	38.861	39.375
347	16.625	19.235	19.004	19.947	18.491	16.287	17.198	18.53	17.769	22.306	22.44	23.862	23.018	21.445	21.711	22.089	21.765	20.733	20.322	21.011	20.009	20.68	18.53	18.949	17.817	17.498	17.176	14.582	14.874	23.964	38.641	39.367
347.5	16.597	19.158	19.076	20.013	18.583	16.348	17.295	18.573	17.785	22.272	22.433	23.681	22.971	21.445	21.611	22.054	21.755	20.643	20.262	20.936	19.954	20.572	18.487	18.961	17.897	17.606	17.219	14.548	14.913	23.618	38.514	39.401
348	16.542	19.008	19.113	19.971	18.571	16.347	17.4	18.595	17.736	22.335	22.445	23.449	22.939	21.409	21.628	21.914	21.746	20.558	20.308	20.862	19.933	20.526	18.581	18.957	17.956	17.603	17.235	14.51	14.993	23.282	38.452	39.604
348.5	16.523	18.86	18.959	19.789	18.409	16.299	17.504	18.595	17.703	22.352	22.399	23.25	22.869	21.294	21.704	21.73	21.673	20.564	20.425	20.846	19.947	20.536	18.69	18.933	17.909	17.585	17.16	14.477	15.016	23.103	38.57	39.775
349	16.605	18.785	18.704	19.643	18.244	16.175	17.424	18.486	17.518	22.399	22.369	23.196	22.783	21.203	21.771	21.61	21.642	20.549	20.48	20.814	19.936	20.538	18.729	18.868	17.881	17.544	17.104	14.457	14.965	23.431	38.893	39.842
349.5	16.659	18.786	18.583	19.557	18.179	16.095	17.339	18.389	17.318	22.438	22.309	23.178	22.781	21.159	21.858	21.603	21.608	20.568	20.464	20.786	19.881	20.566	18.718	18.855	17.88	17.452	17.017	14.475	14.89	23.78	38.764	39.697
350	16.692	18.885	18.538	19.653	18.282	16.093	17.291	18.331	17.126	22.419	22.161	23.18	22.766	21.123	21.914	21.653	21.584	20.502	20.369	20.706	19.839	20.557	18.672	18.885	17.908	17.453	16.899	14.481	14.825	23.905	38.393	39.509
350.5	16.615	18.83	18.535	19.778	18.254	16.103	17.227	18.294	16.984	22.337	22.005	23.145	22.727	21.072	21.852	21.6	21.535	20.364	20.301	20.635	19.84	20.521	18.663	18.865	17.908	17.444	16.805	14.46	14.834	23.828	38.282	39.727
351	16.46	18.911	18.586	19.748	18.148	16.113	17.13	18.259	16.891	22.086	21.805	23.054	22.656	20.984	21.85	21.589	21.494	20.3	20.29	20.58	19.848	20.509	18.691	18.822	17.861	17.396	16.736	14.408	14.872	23.773	38.113	39.962
351.5	16.446	19.121	18.655	19.654	18.088	16.018	16.964	18.168	16.859	21.91	21.679	23.038	22.509	20.862	21.813	21.556	21.444	20.282	20.257	20.55	19.84	20.482	18.677	18.765	17.793	17.399	16.721	14.321	14.902	23.685	38.369	40.271
352	16.492	19.259	18.748	19.592	18.076	15.757	16.73	18.105	16.915	21.855	21.682	23.093	22.462	20.745	21.725	21.529	21.451	20.314	20.224	20.565	19.734	20.494	18.643	18.655	17.785	17.408	16.795	14.247	14.926	23.847	38.759	40.445
352.5	16.585	19.451	18.827	19.645	18.253	15.566	16.608	18.061	17.034	21.914	21.718	23.133	22.413	20.725	21.63	21.568	21.479	20.294	20.14	20.501	19.598	20.518	18.673	18.651	17.867	17.425	16.836	14.226	14.891	24.081	38.737	40.423
353	16.607	19.447	18.835	19.809	18.41	15.461	16.624	18.001	17.123	21.955	21.755	23.088	22.337	20.718	21.552	21.591	21.506	20.193	20.036	20.435	19.479	20.55	18.692	18.642	17.855	17.523	16.872	14.256	14.855	24.217	38.75	40.452
353.5	16.512	19.284	18.755	19.98	18.304	15.446	16.722	17.961	17.184	21.89	21.746	23.039	22.331	20.789	21.444	21.644	21.572	20.103	19.93	20.381	19.452	20.52	18.695	18.682	17.814	17.537	16.886	14.284	14.792	24.234	38.562	40.265
354	16.457	19.085	18.695	20.069	18.138	15.395	16.775	17.783	17.122	21.859	21.804	23.029	22.306	20.808	21.284	21.623	21.437	20.084	19.772	20.35	19.516	20.447	18.683	18.757	17.867	17.501	16.887	14.318	14.714	24.392	38.374	40.177
354.5	16.395	18.792	18.509	20.077	17.968	15.261	16.732	17.597	17.025	21.848	21.822	23.016	22.277	20.808	21.224	21.608	21.245	20.115	19.656	20.404	19.545	20.403	18.634	18.783	17.898	17.434	16.887	14.309	14.657	24.46	38.445	40.106
355	16.391	18.588	18.342	20.001	17.86	15.073	16.592	17.569	16.921	21.934	21.772	22.922	22.339	20.759	21.147	21.499	21.072	20.144	19.625	20.427	19.516	20.331	18.676	18.899	18.011	17.381	16.887	14.273	14.604	24.782	38.651	40.257
355.5	16.304	18.498	18.156	19.848	17.809	14.98	16.511	17.6	16.805	22.028	21.759	22.842	22.326	20.833	21.189	21.396	21.059	20.14	19.644	20.415	19.431	20.246	18.77	18.987	18.043	17.358	16.895	14.269	14.625	25.128	38.859	40.422
356	16.229	18.499	18.1	19.737	17.722	14.964	16.489	17.695	16.659	22.008	21.771	22.777	22.279	21.015	21.287	21.333	21.209	20.01	19.625	20.389	19.319	20.178	18.859	19.004	17.955	17.326	16.847	14.251	14.697	25.259	38.818	40.313
356.5	16.175	18.38	18.206	19.554	17.543	15.057	16.573	17.653	16.429	21.98	21.819	22.837	22.33	21.077	21.319	21.273	21.332	19.847	19.588	20.25	19.202	20.109	18.898	18.941	17.87	17.362	16.844	14.304	14.752	25.177	38.562	40.184
357	16.24	18.241	18.317	19.502	17.46	15.094	16.593	17.419	16.28	21.962	21.795	22.942	22.308	21.081	21.299	21.228	21.39	19.755	19.583	20.152	19.166	20.101	18.885	18.83	17.753	17.361	16.841	14.267	14.714	24.705	38.278	39.983
357.5	16.358	18.208	18.415	19.504	17.389	15.071	16.486	17.265	16.247	22.051	21.82	23.016	22.327	20.95	21.239	21.271	21.355	19.688	19.673	20.113	19.161	20.128	18.822	18.697	17.706	17.365	16.8	14.197	14.68	24.328	37.631	39.656
358	16.4	18.261	18.308	19.585	17.406	15.14	16.424	17.18	16.346	22.078	21.719	22.987	22.339	20.803	21.199	21.192	21.312	19.798	19.837	20.111	19.149	20.117	18.868	18.72	17.767	17.32	16.712	14.164	14.631	24.106	37.483	39.646
358.5	16.374	18.373	18.064	19.643	17.345	15.238	16.361	17.251	16.493	21.981	21.666	22.93	22.317	20.618	21.145	21.029	21.256	19.899	19.889	20.166	19.133	20.111	18.968	18.789	17.888	17.268	16.659	14.153	14.601	24.072	37.379	39.385
359	16.256	18.387	17.831	19.602	17.138	15.329	16.311	17.304	16.498	21.874	21.7	22.86	22.292	20.531	21.147	21.027	21.223	19.9	19.873	20.198	19.117	20.075	19.047	18.829	18.061	17.267	16.669	14.209	14.607	24.174	37.378	39.052
359.5	16.199	18.417	17.812	19.641	16.958	15.293	16.305	17.169	16.353	21.582	21.554	22.768	22.164	20.399	21.165	20.934	21.056	19.874	19.815	20.145	18.999	20.02	19.186	18.859	18.062	17.308	16.708	14.265	14.571	24.44	37.55	38.888
360	16.077	18.407	17.891	19.582	16.925	15.212	16.249	17.072	16.261	21.409	21.4	22.718	22.034	20.265	21.111	20.91	20.889	19.772	19.74	20.032	18.896	19.993	19.262	18.842	17.969	17.327	16.725	14.277	14.576	24.5	37.484	38.675
360.5	16.068	18.441	18.005	19.584	17.02	15.128	16.202	17.027	16.175	21.275	21.255	22.589	21.852	20.351	21.069	20.873	20.785	19.697	19.717	19.949	18.84	19.903	19.257	18.83	17.814	17.287	16.661	14.263	14.619	24.677	37.736	38.72
361	16.04	18.425	17.991	19.567	17.248	15.102	16.208	17.122	16.201	21.159	21.167	22.37	21.75	20.497	21.019	20.822	20.718	19.543	19.639	19.778	18.794	19.87	19.189	18.82	17.653	17.259	16.585	14.251	14.629	24.411	38.287	38.857
361.5	15.932	18.358	17.953	19.419	17.444	15.109	16.177	17.257	16.282	21.154	21.131	22.229	21.852	20.677	20.976	20.854	20.718	19.42	19.584	19.674	18.892	19.828	19.054	18.747	17.576	17.205	16.606	14.224	14.609	23.982	38.635	38.9
362	15.912	18.341	17.803	19.476	17.518	15.104	16.146	17.302	16.287	21.194	21.165	22.175	21.979	20.717	20.996	20.874	20.703	19.359	19.5	19.634	18.984	19.782	18.991	18.672	17.536	17.157	16.696	14.199	14.59	23.787	38.595	39.048
362.5	15.959	18.503	17.766	19.625	17.628	15.048	16.109	17.225	16.298	21.382	21.282	22.228	22.116	20.552	20.99	20.908	20.693	19.355	19.403	19.682	19.09	19.852	19.034	18.61	17.512	17.18	16.756	14.16	14.562	23.827	38.138	39.105
363	16.042	18.592	17.754	19.752	17.651	14.941	16.085	17.098	16.238	21.636	21.39	22.31	22.161	20.365	20.975	20.895	20.823	19.369	19.356	19.755	19.188	19.916	19.164	18.574	17.543	17.253	16.76	14.13	14.541	23.985	37.605	38.869
363.5	16.185	18.561	17.681	19.908	17.613	14.799	16.035	16.983	16.164	21.793	21.416	22.322	22.064	20.279	21.003	20.815	20.943	19.36	19.341	19.791	19.179	19.939	19.276	18.581	17.516	17.375	16.665	14.166	14.563	24.072	37.471	38.82
364	16.232	18.567	17.658	19.952	17.567	14.576	15.956	16.932	16.124	21.868	21.507	22.256	21.992	20.328	20.973	20.818	21.061	19.358	19.363	19.768	19.105	19.896	19.276	18.547	17.423	17.461	16.633	14.216	14.575	23.831	37.717	38.92
364.5	16.141	18.423	17.574	19.864	17.454	14.42	15.886	16.937	16.118	21.841	21.507	22.326	21.916	20.293	20.994	20.804	21.114	19.422	19.391	19.736	18.96	19.79	19.215	18.479	17.287	17.466	16.612	14.299	14.586	23.708	37.908	39.298
365	16.171	18.366	17.429	19.795	17.354	14.399	15.884	16.903	16.127	21.686	21.444	22.379	21.79	20.179	21.022	20.785	21.068	19.484	19.325	19.759	18.828	19.621	19.111	18.438	17.245	17.415	16.683	14.359	14.59	24.017	37.937	39.476
365.5	16.212	18.337	17.334	19.673	17.29	14.536	15.999	16.848	16.099	21.528	21.405	22.338	21.692	20.022	20.927	20.832	21.035	19.415	19.239	19.753	18.727	19.52	19.072	18.444	17.32	17.458	16.828	14.344	14.581	24.324	38.201	39.666
366	16.187	18.262	17.316	19.48	17.243	14.681	16.072	16.745	16.075	21.297	21.263	22.337	21.609	19.99	20.793	20.77	20.988	19.312	19.203	19.717	18.688	19.474	19.126	18.602	17.491	17.52	16.902	14.288	14.569	24.601	38.318	39.632
366.5	16.242	18.345	17.386	19.431	17.308	14.779	16.064	16.614	15.965	21.034	21.158	22.222	21.537	20.05	20.633	20.749	20.913	19.157	19.121	19.574	18.625	19.507	19.265	18.714	17.613	17.586	16.986	14.257	14.598	24.29	38.4	39.438
367	16.254	18.453	17.483	19.459	17.301	14.751	15.985	16.512	15.805	20.893	21.097	22.236	21.502	20.136	20.598	20.829	20.829	19.08	19.103	19.417	18.622	19.639	19.543	18.823	17.637	17.562	16.937	14.206	14.58	23.881	38.445	39.45
367.5	16.319	18.574	17.586	19.531	17.322	14.605	15.926	16.451	15.716	20.892	21.062	22.285	21.574	20.098	20.652	20.842	20.793	19.084	19.089	19.329	18.655	19.715	19.777	18.864	17.626	17.403	16.874	14.244	14.536	24.047	38.282	39.38
368	16.366	18.562	17.591	19.612	17.238	14.504	15.949	16.418	15.652	20.862	21.098	22.365	21.711	20.074	20.791	20.842	20.737	19.076	19.044	19.336	18.672	19.765	19.886	18.774	17.541	17.325	16.824	14.267	14.494	24.027	38.161	39.201
368.5	16.261	18.474	17.518	19.614	17.076	14.457	15.979	16.42	15.723	20.864	21.11	22.386	21.817	20.121	20.837	20.754	20.706	19.136	18.948	19.428	18.689	19.801	19.874	18.706	17.536	17.296	16.865	14.289	14.515	24.052	38.066	39.275
369	16.126	18.45	17.477	19.621	16.963	14.498	15.968	16.454	15.815	20.823	21.123	22.215	21.752	20.23	20.729	20.626	20.742	19.363	18.873	19.476	18.639	19.826	19.812	18.683	17.586	17.34	16.87	14.311	14.595	23.494	37.877	39.413
369.5	16	18.488	17.469	19.512	16.871	14.649	15.896	16.432	15.826	20.806	21.139	21.94	21.445	20.348	20.615	20.656	20.581	19.516	18.85	19.512	18.59	19.832	19.779	18.68	17.666	17.52	16.857	14.282	14.66	23.266	37.683	39.368
370	15.77	18.5	17.561	19.38	16.807	14.771	15.898	16.433	15.824	20.955	21.08	21.768	21.267	20.393	20.509	20.708	20.501	19.609	18.937	19.461	18.499	19.785	19.876	18.729	17.757	17.523	16.842	14.232	14.663	23.46	37.815	39.356
370.5	15.663	18.473	17.831	19.314	16.912	14.895	16.036	16.404	15.744	21.022	21.013	21.661	21.238	20.276	20.435	20.721	20.44	19.524	19.01	19.299	18.376	19.717	20.028	18.788	17.75	17.45	16.807	14.201	14.618	23.771	37.785	38.987
371	15.65	18.354	18.13	19.411	17.057	14.925	16.23	16.382	15.755	21.138	20.896	21.653	21.31	20.182	20.436	20.736	20.373	19.27	18.959	19.224	18.365	19.621	20.034	18.75	17.62	17.375	16.861	14.164	14.581	24.209	37.902	38.34
371.5	15.824	18.309	18.336	19.582	17.163	14.964	16.316	16.399	15.721	21.062	20.775	21.654	21.347	20.094	20.46	20.611	20.362	19.158	18.95	19.184	18.481	19.549	19.959	18.635	17.48	17.256	16.87	14.135	14.521	24.266	38.016	38.044
372	16.101	18.214	18.333	19.633	17.186	15.04	16.324	16.408	15.66	20.965	20.688	21.635	21.249	20.005	20.415	20.451	20.273	19.074	18.932	19.165	18.61	19.543	19.854	18.48	17.361	17.314	16.923	14.103	14.424	24.385	37.705	37.931
372.5	16.246	18.122	18.201	19.463	17.117	15.144	16.229	16.459	15.616	20.987	20.55	21.709	21.186	20.042	20.375	20.431	20.198	19.076	18.957	19.187	18.643	19.519	19.836	18.351	17.302	17.488	16.975	14.09	14.389	24.59	37.733	38.298
373	16.294	18.099	18.175	19.095	17.152	15.308	16.155	16.405	15.556	21.036	20.535	21.876	21.245	20.026	20.277	20.455	20.174	19.044	18.96	19.195	18.607	19.638	19.982	18.333	17.374	17.519	16.989	14.085	14.317	24.425	37.345	38.408
373.5	16.369	18.156	18.363	18.938	17.281	15.459	16.069	16.371	15.587	21.153	20.46	21.95	21.246	20.05	20.171	20.664	20.266	18.972	18.882	19.228	18.5	19.777	20.196	18.379	17.45	17.456	16.942	14.189	14.348	24.208	36.987	38.275
374	16.373	18.112	18.551	18.811	17.347	15.487	15.921	16.347	15.647	21.081	20.317	21.86	21.17	20.042	20.235	20.851	20.385	18.907	18.801	19.255	18.412	19.84	20.296	18.429	17.492	17.289	16.816	14.308	14.421	24.029	36.958	38.185
374.5	16.346	18.064	18.487	18.83	17.244	15.457	15.794	16.322	15.589	20.842	20.176	21.863	21.118	19.999	20.253	20.91	20.495	18.901	18.741	19.378	18.403	19.855	20.361	18.477	17.51	17.113	16.708	14.429	14.447	24.114	37.085	38.292
375	16.22	17.942	18.353	18.868	17.145	15.303	15.784	16.432	15.555	20.697	20.036	21.978	21.111	19.899	20.227	20.763	20.526	18.912	18.706	19.418	18.347	19.82	20.371	18.536	17.43	17.089	16.657	14.45	14.478	24.375	37.356	38.458
375.5	16.109	17.843	18.054	18.823	17.093	15.21	15.934	16.464	15.555	20.557	20.012	22.05	21.264	19.693	20.188	20.477	20.361	18.934	18.693	19.382	18.354	19.786	20.298	18.568	17.35	17.11	16.619	14.345	14.452	24.446	37.489	38.529
376	15.961	17.803	17.801	18.825	17.073	15.139	16.076	16.565	15.687	20.457	20.147	22.051	21.441	19.472	20.139	20.138	20.071	18.946	18.654	19.413	18.407	19.75	20.279	18.583	17.251	17.072	16.602	14.232	14.392	24.172	37.495	38.229
376.5	15.89	17.733	17.776	18.953	17.168	15.115	16.162	16.643	15.857	20.398	20.363	21.885	21.651	19.378	20.204	19.89	19.813	18.93	18.633	19.304	18.449	19.701	20.179	18.522	17.137	17.075	16.643	14.14	14.35	23.379	37.53	37.577
377	15.757	17.569	17.832	19.095	17.078	15.191	16.149	16.697	15.951	20.353	20.542	21.757	21.682	19.331	20.207	19.919	19.702	18.995	18.561	19.179	18.373	19.537	20.133	18.448	17.077	17.111	16.653	14.176	14.317	22.781	37.676	37.23
377.5	15.622	17.445	17.927	19.203	17.011	15.247	16.083	16.803	15.936	20.34	20.704	21.605	21.562	19.355	20.078	19.934	19.679	19.079	18.492	19.047	18.16	19.369	20.178	18.472	17.092	17.156	16.572	14.223	14.282	22.411	37.649	36.95
378	15.631	17.381	18.059	19.199	17.082	15.335	16.125	16.791	15.846	20.446	20.741	21.619	21.401	19.386	20.016	20.02	19.738	19.248	18.528	19.017	18.013	19.292	20.255	18.527	17.163	17.142	16.473	14.267	14.365	22.666	37.503	37.177
378.5	15.745	17.305	18.134	19.013	17.227	15.416	16.192	16.771	15.805	20.539	20.536	21.605	21.113	19.405	19.975	20.164	19.877	19.375	18.533	19.084	17.979	19.326	20.392	18.503	17.239	17.007	16.337	14.257	14.403	23.078	37.409	37.737
379	15.76	17.323	18.167	18.815	17.432	15.502	16.306	16.737	15.803	20.475	20.268	21.546	20.924	19.487	20	20.126	19.92	19.367	18.593	19.101	18.096	19.409	20.547	18.489	17.325	16.921	16.282	14.283	14.44	23.19	37.59	38.598
379.5	15.739	17.471	18.26	18.819	17.571	15.571	16.401	16.702	15.932	20.383	20.091	21.539	20.886	19.645	20.201	20.226	20.112	19.276	18.616	19.111	18.266	19.533	20.794	18.516	17.336	16.931	16.35	14.29	14.448	23.332	37.63	38.853
380	15.678	17.687	18.309	18.97	17.502	15.636	16.565	16.719	16.033	20.252	20.12	21.455	20.824	19.75	20.167	20.273	20.134	19.158	18.609	19	18.252	19.599	20.995	18.613	17.336	16.865	16.412	14.273	14.403	23.595	37.772	38.73
380.5	15.638	17.887	18.251	19.156	17.343	15.654	16.823	16.776	16.136	20.304	20.35	21.455	20.952	19.825	20.144	20.151	19.983	19.16	18.672	19.062	18.201	19.65	21.101	18.769	17.328	16.815	16.517	14.274	14.452	23.783	37.841	38.369
381	15.725	18.023	18.209	19.263	17.26	15.569	16.99	16.807	16.216	20.4	20.268	21.348	20.958	19.842	20.088	20.116	19.849	19.195	18.613	19.223	18.119	19.652	21.115	18.795	17.225	16.737	16.569	14.281	14.546	23.741	37.814	37.623
381.5	15.775	17.996	18.152	19.227	17.153	15.532	17.063	16.845	16.233	20.556	20.153	21.244	20.823	19.655	19.862	19.995	19.603	19.152	18.426	19.264	18.062	19.652	21.004	18.709	17.144	16.695	16.552	14.403	14.648	23.666	37.709	37.64
382	15.65	17.725	18.114	19.099	17.086	15.512	16.907	16.806	16.151	20.54	19.917	21.099	20.658	19.455	19.765	19.916	19.548	19.03	18.311	19.247	18.046	19.588	20.8	18.557	16.966	16.663	16.559	14.554	14.693	23.623	37.468	38.264
382.5	15.38	17.39	18.03	18.924	16.985	15.519	16.65	16.737	16.092	20.337	19.826	20.991	20.486	19.158	19.617	19.985	19.527	18.925	18.21	19.158	17.945	19.536	20.685	18.481	16.849	16.655	16.591	14.636	14.718	24.289	37.113	38.735
383	15.182	17.097	17.932	18.712	16.808	15.561	16.534	16.61	16.119	20.131	19.821	21.108	20.492	18.911	19.497	20.124	19.535	18.967	18.249	19.057	17.782	19.433	20.64	18.513	16.83	16.618	16.605	14.639	14.727	24.858	37.388	39.736
383.5	15.146	16.946	17.789	18.467	16.849	15.546	16.567	16.589	16.167	19.918	19.682	21.233	20.619	18.839	19.584	20.279	19.574	19.079	18.393	19.04	17.68	19.347	20.703	18.555	16.887	16.615	16.658	14.565	14.722	25.117	37.568	39.866
384	15.183	17.066	17.78	18.248	16.989	15.558	16.579	16.575	16.171	19.727	19.476	21.182	20.628	18.961	19.632	20.203	19.589	19.142	18.46	19.003	17.7	19.346	20.904	18.645	17.021	16.728	16.587	14.511	14.724	24.468	37.702	39.376
384.5	15.279	17.185	17.81	18.215	17.213	15.58	16.558	16.48	16.074	19.68	19.295	21.129	20.62	19.047	19.816	20.009	19.637	19.041	18.599	19.036	17.814	19.366	21.141	18.792	17.214	16.851	16.571	14.549	14.747	23.296	37.737	39.168
385	15.286	17.062	17.849	18.198	17.444	15.584	16.468	16.517	16.005	19.615	19.234	20.87	20.454	19.158	20.019	19.674	19.63	18.936	18.785	19.132	18.103	19.504	21.197	18.857	17.322	16.862	16.585	14.547	14.695	22.56	37.704	38.774
385.5	15.282	17.122	17.819	18.148	17.503	15.607	16.449	16.452	16.026	19.697	19.265	20.73	20.415	19.178	20.091	19.539	19.577	18.897	18.784	19.22	18.304	19.629	21.105	18.836	17.338	16.902	16.622	14.592	14.737	22.655	38.483	38.532
386	15.355	17.193	17.615	18.193	17.276	15.589	16.534	16.492	16.116	19.805	19.289	20.729	20.539	19.081	20.071	19.607	19.394	18.819	18.656	19.216	18.356	19.692	20.971	18.761	17.368	16.909	16.653	14.657	14.746	23.314	39.212	38.525
386.5	15.241	17.168	17.559	18.209	16.79	15.612	16.619	16.513	16.105	19.965	19.326	20.786	20.628	18.965	19.892	19.72	19.329	18.8	18.343	19.073	18.368	19.795	20.838	18.493	17.151	16.92	16.681	14.718	14.776	23.86	39.52	38.705
387	15.045	17.11	17.739	18.341	16.461	15.714	16.613	16.434	15.999	20.157	19.372	20.938	20.798	18.773	19.641	19.75	19.221	18.846	18.134	19.03	18.241	19.771	20.821	18.371	16.973	17.085	16.972	14.831	14.897	23.309	39.481	39.017
387.5	14.94	16.874	18.073	18.483	16.389	15.832	16.464	16.407	15.925	20.117	19.432	21.073	20.759	18.625	19.52	19.679	19.214	18.879	18.041	18.985	18.152	19.729	20.961	18.473	17.027	17.116	17.185	14.941	15.041	22.548	39.044	39.403
388	14.969	16.684	18.293	18.433	16.553	15.967	16.366	16.292	15.898	19.833	19.433	21.104	20.725	18.718	19.542	19.72	19.266	19.052	18.116	19.019	18.126	19.653	20.936	18.591	17.037	17.022	17.287	14.975	15.103	22.084	38.473	39.567
388.5	15.164	16.782	18.447	18.467	16.773	16.034	16.393	16.306	15.932	19.426	19.259	21.089	20.639	18.981	19.482	19.728	19.286	19.197	18.168	19.081	18.076	19.509	20.912	18.766	17.25	16.874	17.216	15.015	15.103	21.857	38.445	39.672
389	15.447	17.018	18.453	18.641	16.885	16.049	16.513	16.527	16.031	19.149	19.123	21	20.517	19.098	19.367	19.793	19.301	19.166	18.257	19.15	18.067	19.493	20.905	18.64	17.248	16.636	16.793	14.954	14.984	22.032	38.748	39.547
389.5	15.593	17.184	18.422	18.886	17.001	16.058	16.596	16.848	16.086	19.187	19.003	20.961	20.542	19.051	19.253	19.783	19.255	19.179	18.364	19.204	18.16	19.622	20.866	18.404	17.132	16.575	16.584	14.859	14.859	22.222	38.693	39.694
390	15.374	17.202	18.369	19.062	16.984	16.076	16.626	17.16	16.151	19.379	18.914	21.003	20.609	18.841	19.325	19.73	19.201	19.212	18.393	19.257	18.24	19.792	20.703	18.177	17.034	16.443	16.494	14.835	14.893	22.37	38.618	39.816
390.5	15.131	17.147	18.183	18.96	16.981	16.003	16.483	17.332	16.235	19.58	18.857	21.105	20.744	18.47	19.339	19.62	19.102	19.23	18.377	19.231	18.363	19.967	20.507	18.047	16.891	16.467	16.505	14.989	14.982	23.263	38.369	39.995
391	14.887	17.147	18.043	18.769	16.951	15.92	16.419	17.25	16.242	19.603	18.689	21.069	20.713	18.301	19.186	19.394	18.982	19.294	18.265	19.142	18.405	19.929	20.392	18.189	16.74	16.625	16.678	15.216	15.148	24.162	38.1	40.204
391.5	14.823	17.416	18.115	18.695	16.903	15.875	16.455	17.026	16.286	19.428	18.521	20.948	20.612	18.217	18.92	19.071	18.875	19.295	18.279	19.061	18.325	19.718	20.522	18.49	16.594	16.715	16.803	15.43	15.273	24.826	38.381	40.151
392	15.129	17.671	18.156	18.765	17.174	15.891	16.48	16.843	16.278	19.201	18.448	20.86	20.55	18.171	18.563	18.799	18.66	19.24	18.299	19.006	18.401	19.509	20.744	18.804	16.438	16.861	17.001	15.471	15.355	25.053	38.961	40.138
392.5	15.392	17.808	18.199	18.936	17.401	15.954	16.408	16.471	16.086	19.18	18.52	20.906	20.512	18.144	18.343	18.543	18.317	19.214	18.281	18.981	18.503	19.278	20.885	18.836	16.28	16.885	17.082	15.45	15.336	24.461	39.177	40.612
393	15.459	17.71	18.039	18.865	17.398	15.941	16.229	16.347	15.927	19.117	18.481	20.991	20.45	18.089	18.331	18.621	18.213	19.121	18.27	19.065	18.575	19.166	20.743	18.642	16.192	16.85	17.099	15.429	15.248	23.436	39.16	40.929
393.5	15.491	17.529	17.882	18.751	17.208	15.862	16.14	16.413	15.798	19.066	18.562	20.985	20.115	18.001	18.313	18.867	18.27	19.045	18.191	19.096	18.6	19.159	20.485	18.222	16.101	17	16.995	15.495	15.214	22.625	38.904	40.498
394	15.318	17.299	17.857	18.619	16.767	15.673	16.156	16.464	15.829	19.067	18.674	20.828	19.856	17.83	18.439	19.13	18.563	18.979	18.27	19.145	18.487	19.167	20.488	17.988	16.234	17.072	16.938	15.545	15.25	22.035	38.758	39.927
394.5	15.085	16.811	17.825	18.385	16.363	15.515	16.334	16.528	16.014	18.828	18.516	20.499	19.58	17.779	18.574	19.071	18.609	18.795	18.419	19.157	18.287	19.298	20.637	18.098	16.537	17.163	16.923	15.547	15.305	21.948	38.826	39.427
395	14.992	16.401	17.783	18.214	16.289	15.481	16.465	16.434	16.113	18.618	18.472	20.278	19.555	17.54	18.615	18.922	18.428	18.776	18.542	19.232	18.093	19.329	20.812	18.193	16.699	17.077	16.827	15.579	15.314	22.184	39.287	39.733
395.5	14.862	16.195	17.583	17.961	16.308	15.523	16.559	16.28	16.082	18.533	18.159	20.168	19.615	17.33	18.41	18.624	18.026	18.71	18.584	19.274	17.909	19.55	20.986	18.454	16.781	16.935	16.659	15.499	15.305	22.695	39.605	40.479
396	14.869	16.365	17.446	17.807	16.401	15.614	16.629	16.256	16.041	18.512	18.007	20.126	19.618	17.201	18.028	18.34	17.662	18.741	18.54	19.204	17.826	19.853	20.853	18.521	16.56	16.876	16.568	15.465	15.264	23.222	39.973	40.99
396.5	15.019	16.883	17.658	18.002	16.581	15.759	16.834	16.204	16.158	18.782	17.982	20.223	19.749	17.07	17.519	18.171	17.481	18.881	18.349	19.14	18.016	20.016	20.751	18.503	16.425	16.872	16.623	15.438	15.406	23.88	40.496	41.189
397	15.216	17.364	18.104	18.355	16.678	15.9	17.037	16.186	16.347	19.066	17.924	20.249	19.875	17.112	17.364	17.97	17.269	18.969	18.198	19.002	18.247	20.03	20.52	18.48	16.421	16.988	16.661	15.436	15.642	24.164	40.739	41.375
397.5	15.497	17.721	18.436	18.607	16.807	15.929	17.074	16.377	16.432	19.027	17.808	20.153	19.875	17.272	17.548	17.709	17.255	19.066	18.217	18.956	18.369	19.779	20.296	18.43	16.465	17.081	16.621	15.546	15.741	24.349	41.249	41.281
398	15.797	18.008	18.435	18.782	16.96	15.899	17.069	16.636	16.219	18.82	17.702	19.999	19.964	17.419	17.758	17.571	17.246	19.259	18.406	19.084	18.571	19.63	20.137	18.413	16.454	17.273	16.718	15.642	15.817	23.901	40.927	40.667
398.5	15.473	17.889	18.063	18.568	16.727	15.663	16.774	16.677	15.854	18.545	17.713	19.987	20.128	17.385	17.874	17.105	17.055	19.382	18.661	19.197	18.644	19.519	20.141	18.464	16.387	17.478	16.944	15.717	15.75	22.99	40.348	40.007
399	15.072	17.552	17.704	18.331	16.468	15.473	16.455	16.53	15.58	18.479	17.872	20.067	20.442	17.169	17.665	16.59	16.901	19.432	18.839	19.175	18.786	19.515	20.228	18.429	16.309	17.496	17.186	15.728	15.611	22.297	39.406	39.056
399.5	14.581	17.087	17.587	18.182	16.257	15.372	16.14	16.21	15.567	18.531	18.077	20.303	20.821	17.068	17.461	16.362	16.855	19.447	18.846	19.097	18.841	19.481	20.341	18.435	16.172	17.255	17.297	15.802	15.67	22.449	38.271	38.475
400	14.373	16.651	17.483	17.893	16.004	15.45	16.132	16.007	15.705	18.47	17.999	20.368	20.823	16.984	17.433	16.422	17.074	19.406	18.817	18.777	18.498	19.504	20.488	18.406	16.151	16.941	17.345	15.863	15.753	23.698	37.819	38.637
400.5	14.721	16.537	17.582	17.712	16.001	15.64	16.276	16.149	15.769	18.551	17.815	20.204	20.711	17.026	17.511	16.873	17.347	19.276	18.707	18.472	18.129	19.71	20.544	18.339	16.045	16.795	17.321	15.977	15.864	24.756	37.974	39.035
401	15.099	16.586	17.825	17.566	15.989	15.827	16.422	16.219	15.621	18.665	17.633	19.876	20.475	17.15	17.599	17.337	17.531	19.213	18.712	18.465	18.017	19.976	20.478	18.293	15.966	16.779	17.33	16.037	15.846	25.002	38.845	39.252
401.5	15.299	16.748	17.98	17.424	16.031	15.991	16.508	16.268	15.524	18.807	17.505	19.632	20.246	17.062	17.566	17.592	17.6	19.171	18.878	18.664	18.203	20.171	20.397	18.312	16.022	16.922	17.307	16.039	15.698	24.15	39.454	39.46
402	15.153	16.792	17.925	17.398	15.905	16.036	16.432	16.214	15.591	18.813	17.444	19.604	20.025	16.988	17.579	17.672	17.665	19.041	18.997	18.877	18.408	20.127	20.31	18.398	16.101	16.965	17.248	16.002	15.649	23.264	39.491	40.077
402.5	14.84	16.779	17.73	17.257	15.933	15.967	16.391	16.114	15.755	18.51	17.331	19.606	19.786	16.986	17.544	17.632	17.679	19.194	19.162	19.179	18.586	20.048	20.35	18.429	16.119	17.031	17.292	15.891	15.754	22.553	39.777	41.297
403	14.574	16.661	17.382	17.162	15.907	15.92	16.434	16.099	15.867	18.198	17.187	19.793	19.432	17.029	17.521	17.549	17.624	19.294	19.026	19.388	18.538	19.731	20.654	18.399	16.207	17.247	17.388	15.803	16.002	22.832	40.234	42.54
403.5	14.462	16.681	17.336	17.369	16.125	15.906	16.463	16.173	15.814	17.893	16.882	19.804	19.097	17.183	17.594	17.642	17.597	19.328	19.045	19.534	18.395	19.527	20.762	18.208	16.198	17.391	17.394	15.752	16.138	23.002	40.869	42.751
404	14.633	16.892	17.568	17.697	16.674	15.91	16.472	16.25	15.736	17.751	16.865	19.789	19.137	17.287	17.793	17.629	17.637	19.228	19.05	19.424	18.35	19.445	20.835	18.167	16.186	17.313	17.224	15.785	16.19	23.53	41.424	42.234
404.5	14.625	17.216	17.639	18.022	16.953	15.917	16.357	16.264	15.629	17.691	17.056	19.783	19.326	17.203	18.044	17.627	17.655	18.924	18.927	19.011	18.143	19.328	20.847	18.248	16.238	17.132	17.153	15.955	16.236	23.991	41.481	42.006
405	14.61	17.341	17.805	18.051	16.93	15.953	16.285	16.212	15.578	17.617	17.311	19.694	19.601	17.079	18.178	17.435	17.528	18.84	18.763	18.542	17.937	19.426	20.642	18.374	16.043	16.961	17.063	16.103	16.192	23.476	41.146	41.962
405.5	14.271	17.11	17.867	17.741	16.525	15.908	16.342	16.151	15.604	17.83	17.531	19.638	19.843	17.145	18.219	17.189	17.359	19.006	18.383	18.281	17.782	19.462	20.354	18.395	15.956	16.928	17.004	16.305	16.186	23.746	41.099	42.142
406	14.074	16.7	17.688	17.459	16.021	15.837	16.526	16.171	15.526	17.845	17.37	19.833	19.659	17.43	18.184	17.379	17.365	19.228	18.124	18.175	17.707	19.607	19.999	18.29	15.768	17.139	17.178	16.44	16.137	23.02	41.061	42.065
406.5	14.208	16.506	17.706	17.597	15.827	15.837	16.854	16.299	15.554	17.741	17.238	19.99	19.542	17.742	18.094	17.467	17.58	19.353	17.953	18.185	17.771	19.646	19.847	18.247	15.851	17.246	17.363	16.434	16.17	22.178	40.878	41.607
407	14.427	16.384	17.781	17.9	15.864	15.875	17.065	16.308	15.535	17.743	17.306	20.076	19.411	17.862	18.069	17.731	17.949	19.184	17.891	18.119	17.9	19.576	19.873	18.251	15.925	17.183	17.717	16.493	16.284	22.138	41.298	41.65
407.5	14.633	16.24	17.794	18.205	16.164	15.981	17.318	16.328	15.33	17.731	17.445	20.053	19.371	17.742	17.886	17.728	18.024	18.932	17.894	18.131	17.819	19.673	20.021	18.314	15.863	17.012	17.917	16.473	16.343	22.403	41.798	41.423
408	14.629	16.329	18.11	18.234	16.616	16.062	17.37	16.228	15.198	18.035	17.575	19.986	19.519	17.52	17.954	17.713	17.862	18.821	17.926	18.406	17.753	19.639	20.08	18.278	15.956	16.902	17.842	16.439	16.187	23.646	42.038	41.375
408.5	14.586	16.346	18.201	17.906	17.095	16.095	17.339	16.038	15.114	18.32	17.589	20.141	19.719	17.39	18.042	17.841	17.718	18.717	18.027	18.795	17.593	19.74	19.99	18.162	15.978	16.931	17.78	16.419	15.99	24.655	42.296	41.4
409	14.67	16.562	18.218	17.688	17.215	16.148	17.296	15.956	15.199	18.384	17.528	20.244	19.731	17.314	18.146	17.974	17.654	18.77	18.188	19.142	17.564	19.892	19.841	17.927	15.968	17.125	17.709	16.447	15.942	24.486	42.185	41.797
409.5	14.782	16.622	18.161	17.531	17.071	16.182	17.082	15.76	15.51	18.102	17.406	20.126	19.535	17.391	18.167	17.855	17.866	18.7	18.303	19.417	17.777	19.872	19.893	17.747	15.875	17.176	17.704	16.538	15.943	23.216	42.048	42.407
410	14.683	16.675	17.92	17.487	16.623	16.255	17.019	15.633	15.658	17.771	17.423	19.849	19.419	17.568	18.075	17.613	18.013	18.678	18.416	19.345	17.911	19.834	19.935	17.545	15.761	17.166	17.721	16.61	16.084	22.063	41.696	42.473
410.5	14.628	16.72	17.788	17.613	16.421	16.384	17.092	15.663	15.591	17.436	17.244	19.453	19.347	17.659	18.182	17.53	17.901	18.669	18.419	19.038	18.062	19.819	20.09	17.666	15.757	17.055	17.642	16.609	16.153	21.522	41.003	42.364
411	14.569	16.901	17.828	17.643	16.553	16.462	17.197	15.657	15.424	17.391	17.163	19.22	19.41	17.836	18.255	17.686	17.9	18.646	18.416	18.902	18.196	19.682	20.261	17.958	15.963	16.993	17.499	16.459	16.095	22.241	40.626	42.029
411.5	14.563	16.946	18.055	17.721	16.852	16.502	17.217	15.821	15.295	17.604	17.153	19.229	19.436	17.781	18.119	17.774	17.851	18.687	18.368	18.69	18.215	19.653	20.276	18.165	16.219	17.068	17.436	16.424	16.105	22.832	40.678	42.103
412	14.668	16.77	18.255	17.79	17.226	16.435	17.066	15.921	15.303	17.869	17.015	19.327	19.169	17.711	18.018	17.785	17.963	18.755	18.384	18.688	18.319	19.608	20.392	18.188	16.277	17.135	17.506	16.436	16.056	23.015	41.082	42.146
412.5	14.718	16.707	18.264	17.748	17.433	16.437	17.036	15.97	15.355	18.098	17.182	19.401	19.079	17.409	17.925	17.492	17.951	18.919	18.373	18.679	18.223	19.568	20.323	18.049	16.237	17.213	17.629	16.402	16.017	22.614	41.512	42.245
413	14.662	16.659	18.18	17.79	17.475	16.488	17	15.981	15.404	17.992	17.244	19.408	19.036	17.193	18.112	17.422	17.96	19.063	18.294	18.584	18.118	19.567	20.131	17.9	16.138	17.206	17.827	16.524	16.136	22.212	41.919	42.458
413.5	14.661	16.621	18.19	17.748	17.343	16.599	17.038	15.928	15.358	17.741	17.282	19.204	19.112	17.276	18.512	17.746	18.129	19.067	18.177	18.549	17.94	19.619	19.895	17.882	15.88	17.087	17.9	16.704	16.324	22.456	41.888	42.469
414	14.619	16.45	18.22	17.654	17.374	16.736	17.044	15.821	15.314	17.501	17.382	18.972	19.135	17.473	18.717	18.095	18.246	18.994	18.081	18.592	17.934	19.762	19.861	17.93	15.818	17.034	17.789	16.873	16.514	23.303	42.409	42.823
414.5	14.632	16.302	18.386	17.666	17.332	16.649	16.968	15.763	15.352	17.463	17.462	18.965	19.037	17.707	18.616	18.28	18.415	18.918	18.169	18.668	18.169	19.915	19.884	17.82	15.749	16.949	17.723	16.931	16.56	23.791	42.73	42.445
415	14.684	16.192	18.383	17.709	17.295	16.558	17.025	15.709	15.426	17.668	17.599	19.129	19.076	17.941	18.536	18.426	18.569	18.993	18.318	18.742	18.345	19.953	19.975	17.778	15.772	16.873	17.511	16.869	16.414	24.691	42.759	42.207
415.5	14.597	16.202	18.222	17.828	17.144	16.46	17.13	15.807	15.576	17.935	17.682	19.328	19.195	17.821	18.316	17.986	18.485	19.076	18.446	18.757	18.492	19.941	19.883	17.834	15.852	16.775	17.381	16.793	16.26	25.344	42.839	42.064
416	14.529	16.328	18.07	18.014	16.843	16.313	17.044	15.954	15.697	18.135	17.611	19.509	19.481	17.782	18.305	17.794	18.571	19.068	18.363	18.508	18.367	19.901	19.703	17.807	15.814	16.697	17.397	16.858	16.246	25.321	42.436	42.026
416.5	14.552	16.354	17.984	18.099	16.683	16.208	16.934	16.063	15.791	18.22	17.658	19.526	19.71	17.831	18.369	17.761	18.763	19.027	18.201	18.259	18.163	19.922	19.721	17.846	15.774	16.582	17.291	16.962	16.352	25.291	41.837	41.914
417	14.571	16.534	17.916	18.226	16.705	16.111	16.969	16.086	15.718	18.174	17.724	19.525	19.791	17.805	18.312	17.864	18.87	18.81	18.112	18.168	17.948	19.996	19.796	17.779	15.867	16.545	17.293	17.008	16.489	24.994	41.87	41.474
417.5	14.718	16.797	18.108	18.293	16.921	16.059	17.094	16.116	15.605	18.168	17.873	19.68	19.87	17.855	18.363	18.28	19.02	18.703	18.07	18.384	17.829	19.956	19.87	17.698	15.895	16.597	17.3	17.056	16.534	24.727	41.735	41.249
418	14.799	16.888	18.231	18.454	17.018	16.118	17.278	16.102	15.415	17.909	17.902	19.664	19.824	17.874	18.441	18.392	18.823	18.666	18.04	18.642	17.784	20.015	19.84	17.767	15.898	16.665	17.297	16.974	16.507	24.69	42.022	41.484
418.5	14.852	16.912	18.3	18.443	16.973	16.241	17.236	15.998	15.338	17.593	17.719	19.573	19.697	17.72	18.495	18.338	18.506	18.576	17.913	18.83	17.81	20.142	19.778	17.873	15.852	16.736	17.331	16.948	16.446	24.625	41.692	41.678
419	14.961	16.796	18.293	18.428	17.04	16.368	17.114	15.877	15.367	17.465	17.536	19.374	19.685	17.649	18.517	18.261	18.348	18.591	17.834	18.731	17.964	20.256	19.677	17.972	15.729	16.748	17.309	16.959	16.444	24.365	41.378	41.681
419.5	14.948	16.735	18.212	18.16	17.113	16.35	17.026	15.81	15.31	17.438	17.464	19.332	19.696	17.592	18.302	18.104	18.431	18.636	17.941	18.564	18.018	20.341	19.615	18.075	15.707	16.712	17.317	17.051	16.557	24.213	40.607	41.191
420	14.931	16.958	18.394	17.855	17.205	16.231	17.025	15.776	15.39	17.726	17.553	19.6	19.747	17.571	18.053	18.023	18.495	18.805	18.178	18.529	18.049	20.192	19.558	18.089	15.711	16.7	17.459	17.196	16.729	24.179	40.479	40.988
420.5	14.768	17.121	18.567	17.586	17.215	16.044	17.015	15.785	15.47	18.085	17.758	19.991	19.839	17.558	17.929	17.879	18.416	19.034	18.526	18.639	18.084	20.052	19.483	18.108	15.728	16.735	17.69	17.177	16.788	24.292	40.829	41.218
421	14.616	17.205	18.672	17.412	16.983	16.013	16.895	15.682	15.528	18.309	17.977	20.119	19.916	17.603	18.061	17.771	18.237	19.062	18.561	18.857	17.979	20.079	19.58	18.159	15.646	16.847	17.747	17.17	16.833	24.565	41.557	42.099
421.5	14.681	17.149	18.681	17.514	16.923	16.072	16.831	15.618	15.568	18.54	18.052	20.067	20.035	17.821	18.358	17.948	18.13	18.946	18.404	18.986	17.956	20.045	19.625	18.191	15.525	16.997	17.675	17.169	16.824	24.829	42.476	42.64
422	14.847	16.974	18.421	17.693	16.902	16.155	16.922	15.535	15.465	18.497	17.983	19.901	19.979	17.941	18.706	18.207	18.336	18.892	18.167	18.987	17.72	20.006	19.722	18.21	15.466	17.097	17.562	17.078	16.868	24.842	42.424	42.892
422.5	15.089	16.863	18.315	17.837	16.929	16.17	17.13	15.502	15.325	18.268	17.877	19.844	19.837	18.051	18.755	18.403	18.518	18.966	18.1	18.928	17.522	19.875	19.744	18.151	15.388	17.134	17.546	17.158	16.958	24.656	42.291	42.922
423	15.301	16.847	18.318	17.923	16.896	16.106	17.305	15.487	15.331	18.037	17.77	19.81	19.547	17.958	18.606	18.346	18.598	19.15	18.201	18.945	17.491	19.712	19.731	18.111	15.453	17.059	17.723	17.16	16.933	24.454	41.973	42.976
423.5	15.285	16.917	18.309	17.863	16.954	15.997	17.175	15.475	15.291	17.934	17.725	19.682	19.522	17.927	18.518	18.141	18.533	19.227	18.199	18.836	17.507	19.777	19.708	18.053	15.467	16.934	17.737	17.198	16.864	24.546	42.085	43.163
424	15.39	17.161	18.494	17.995	17.273	15.971	17	15.517	15.276	17.885	17.707	19.403	19.714	18.132	18.596	18.127	18.546	19.111	18.205	18.788	17.623	19.889	19.647	17.975	15.482	16.964	17.71	17.273	16.8	24.806	42.215	42.961
424.5	15.328	17.288	18.606	18.106	17.482	16.029	16.843	15.554	15.316	17.767	17.729	19.158	19.968	18.316	18.715	18.061	18.496	18.967	18.024	18.701	17.546	19.982	19.702	17.923	15.436	16.953	17.612	17.199	16.785	25.412	41.573	42.834
425	15.205	17.371	18.741	18.32	17.529	16.128	16.865	15.443	15.305	17.698	17.772	19.089	20.075	18.393	18.786	18.126	18.408	18.83	17.915	18.698	17.474	20.058	19.823	17.877	15.368	16.827	17.427	17.168	16.842	25.785	40.982	42.92
425.5	15.201	17.295	18.826	18.459	17.354	16.221	16.994	15.448	15.249	17.743	17.934	19.26	20.097	18.306	18.713	18.144	18.291	18.693	17.907	18.83	17.524	20.19	20.016	17.836	15.329	16.722	17.377	17.128	16.858	26.094	40.593	43.265
426	15.25	17.277	18.951	18.681	17.131	16.218	16.933	15.463	15.206	17.875	18.124	19.513	19.942	18.239	18.866	18.195	18.304	18.606	17.871	18.937	17.72	20.332	20.197	17.88	15.412	16.551	17.357	17.123	16.876	26.043	41.019	43.378
426.5	15.286	17.21	18.96	18.833	17.074	16.22	16.819	15.575	15.22	17.958	18.151	19.817	19.893	18.191	19.341	18.365	18.476	18.633	18.025	19.166	17.94	20.287	20.143	17.779	15.455	16.539	17.321	17.03	16.773	25.636	41.246	42.919
427	15.281	17.028	18.755	18.726	17.088	16.28	16.665	15.637	15.289	17.941	18.152	19.945	19.88	18.115	19.471	18.32	18.582	18.73	18.236	19.323	18.078	20.037	20.066	17.854	15.611	16.568	17.335	16.939	16.695	25.788	41.092	42.154
427.5	15.196	16.882	18.585	18.586	17.054	16.453	16.68	15.607	15.421	17.879	18.099	19.938	19.842	17.993	19.366	18.265	18.568	18.808	18.402	19.473	18.193	19.787	19.927	17.892	15.607	16.4	17.261	17.001	16.68	25.826	40.837	41.558
428	15.185	16.838	18.363	18.35	16.985	16.562	16.853	15.752	15.418	17.873	17.911	19.941	19.81	17.943	19.023	18.342	18.647	18.848	18.475	19.464	18.138	19.585	19.944	17.879	15.591	16.378	17.298	17.061	16.683	25.988	40.739	41.401
428.5	15.351	17.064	18.533	18.326	17.151	16.525	17.085	15.84	15.434	17.844	17.805	19.912	19.811	18.176	18.832	18.553	18.684	18.841	18.385	19.235	17.985	19.652	20.068	17.887	15.58	16.547	17.558	17.287	16.823	26.337	41.535	41.421
429	15.536	17.255	18.665	18.294	17.36	16.396	17.25	15.989	15.428	17.673	17.791	19.932	19.894	18.299	18.803	18.662	18.721	18.862	18.161	19.083	17.754	19.633	20.175	17.78	15.481	16.74	17.771	17.415	16.921	26.293	42.068	41.68
429.5	15.554	17.235	18.657	18.283	17.614	16.063	17.256	15.961	15.305	17.428	17.846	19.952	19.948	18.463	18.815	18.636	18.72	18.883	18.135	18.928	17.606	19.766	20.129	17.677	15.349	16.865	17.886	17.36	16.982	26.117	42.45	42.209
430	15.546	17.132	18.65	18.349	17.756	15.853	17.265	15.761	15.156	17.295	18.003	19.85	20.013	18.49	18.718	18.618	18.596	18.856	18.045	18.971	17.582	19.82	20.138	17.765	15.377	16.93	17.943	17.288	17.019	26.068	42.505	42.317
430.5	15.375	16.986	18.634	18.476	17.717	15.798	17.283	15.652	14.99	17.229	18.078	19.706	20.07	18.455	18.516	18.539	18.517	18.856	18.162	19.03	17.746	19.908	20.102	17.733	15.352	16.974	17.764	17.203	17.047	25.881	42.455	42.353
431	15.262	17.111	18.83	18.636	17.631	16.028	17.414	15.663	15.001	17.399	18.036	19.595	20.115	18.339	18.464	18.453	18.387	18.911	18.352	19.106	17.942	19.969	20.112	17.74	15.51	17.101	17.691	17.19	17.084	25.856	42.54	42.099
431.5	15.171	17.205	18.982	18.648	17.447	16.347	17.536	15.659	15.093	17.636	18.079	19.608	20.154	18.29	18.525	18.437	18.306	19.027	18.454	19.146	18.202	19.902	20.177	17.729	15.655	17.197	17.616	17.214	16.941	26.318	42.507	41.964
432	15.096	17.216	19.032	18.591	17.282	16.582	17.541	15.67	15.202	17.794	18.121	19.665	19.984	18.375	18.686	18.404	18.378	19.118	18.612	19.196	18.335	19.951	20.055	17.672	15.694	17.154	17.523	17.266	16.806	26.288	42.207	42.116
432.5	15.103	17.207	19.033	18.42	17.142	16.675	17.452	15.645	15.288	17.873	18.042	19.732	19.731	18.509	18.823	18.404	18.566	19.132	18.592	19.217	18.258	20.021	19.93	17.747	15.682	17.134	17.51	17.259	16.639	25.835	42.047	42.292
433	15.067	17.08	19.001	18.309	17.106	16.711	17.28	15.541	15.263	17.918	17.922	19.776	19.476	18.659	18.989	18.457	18.757	19.051	18.473	19.211	17.96	19.993	19.933	17.94	15.65	17.16	17.481	17.282	16.592	25.487	42.053	42.435
433.5	15.036	16.947	19.072	18.308	16.963	16.665	17.012	15.544	15.253	17.87	17.852	19.762	19.325	18.633	19.072	18.484	18.75	18.911	18.365	19.218	17.65	19.931	19.948	18.113	15.689	17.113	17.478	17.256	16.683	25.174	42.127	42.667
434	15.051	16.941	19.047	18.401	16.897	16.554	16.817	15.399	15.157	17.815	17.913	19.725	19.35	18.626	19.277	18.741	18.771	18.769	18.225	19.197	17.399	19.905	20.027	18.294	15.646	17.006	17.542	17.208	16.721	25.624	42.239	43.021
434.5	15.09	17.112	18.977	18.545	16.924	16.486	16.722	15.323	15.12	17.848	18.05	19.717	19.556	18.687	19.459	19.209	18.903	18.672	18.233	19.2	17.309	19.997	20.002	18.351	15.637	16.824	17.515	17.15	16.747	26.216	41.831	42.988
435	15.21	17.286	18.889	18.672	17.089	16.405	16.763	15.33	15.184	18.011	18.235	19.74	19.848	18.703	19.554	19.566	19.167	18.71	18.306	19.161	17.361	20.178	19.864	18.298	15.563	16.655	17.472	17.176	16.81	26.357	41.484	43.019
435.5	15.289	17.478	18.777	18.769	17.305	16.384	16.894	15.398	15.239	18.196	18.292	19.911	20.107	18.728	19.628	19.585	19.328	18.81	18.396	19.198	17.432	20.236	19.755	18.213	15.495	16.654	17.449	17.287	16.914	26.105	41.197	42.771
436	15.228	17.415	18.789	18.893	17.41	16.397	17.016	15.621	15.243	18.32	18.204	20.052	20.195	18.607	19.473	19.253	19.303	18.863	18.449	19.151	17.455	20.024	19.772	18.192	15.624	16.82	17.471	17.416	17.012	26.095	41.316	42.593
436.5	15.276	17.21	18.797	18.99	17.374	16.411	17.137	15.662	15.144	18.306	18.127	20.057	20.114	18.611	19.367	18.874	19.127	18.887	18.393	19.029	17.486	19.79	19.784	18.135	15.605	16.931	17.414	17.522	17.062	26.256	41.368	42.35
437	15.391	17.204	18.827	18.944	17.377	16.443	17.16	15.554	15.007	18.241	18.098	20.033	19.96	18.787	19.26	18.743	18.966	18.836	18.352	18.983	17.471	19.669	19.887	18.097	15.547	16.964	17.374	17.53	17.067	26.551	41.624	41.971
437.5	15.407	17.132	18.762	18.739	17.365	16.379	17.115	15.488	14.95	18.208	18.13	19.955	19.985	19.006	19.328	18.9	19.003	18.853	18.352	18.944	17.575	19.634	20.039	18.081	15.528	16.82	17.32	17.558	17.056	26.893	41.914	42.028
438	15.393	17.128	18.858	18.53	17.266	16.286	17.054	15.493	15.03	18.159	18.229	19.885	20.02	19.261	19.432	19.031	18.979	18.995	18.422	19.054	17.698	19.714	20.119	18.025	15.536	16.585	17.335	17.474	17.007	26.905	42.144	42.021
438.5	15.38	17.317	18.938	18.468	17.187	16.143	16.973	15.559	15.165	18.076	18.239	19.944	20.136	19.191	19.348	18.934	18.91	19.189	18.484	19.198	17.759	19.819	20.167	18.117	15.72	16.549	17.437	17.329	16.929	26.731	41.83	41.77
439	15.34	17.366	18.906	18.381	17.179	15.983	16.879	15.618	15.225	18.019	18.177	19.965	20.077	19.011	19.18	18.723	18.767	19.169	18.435	19.262	17.76	19.837	20.049	18.136	15.828	16.511	17.398	17.232	16.786	26.231	41.312	41.493
439.5	15.392	17.454	18.906	18.35	17.2	15.893	16.871	15.58	15.226	18.041	18.204	20.033	19.997	18.938	18.977	18.667	18.774	18.95	18.236	19.243	17.593	19.837	19.921	18.122	15.761	16.628	17.403	17.173	16.696	25.734	40.694	41.06
440	15.373	17.485	18.845	18.363	17.392	15.896	16.881	15.399	15.095	18.065	18.162	20.005	19.857	18.926	18.968	18.854	18.975	18.712	18.006	19.169	17.463	19.796	19.815	18.026	15.706	16.877	17.512	17.269	16.714	24.993	40.577	40.988
440.5	15.343	17.443	18.968	18.418	17.588	16.022	16.955	15.259	15.07	18.057	18.13	19.972	19.825	18.96	19.084	19.044	19.269	18.488	17.806	19.072	17.336	19.719	19.704	17.834	15.553	17.099	17.608	17.354	16.776	24.424	41.001	41.122
441	15.283	17.349	19.049	18.485	17.578	16.196	17.047	15.093	15.126	17.966	18.078	19.971	19.874	18.911	19.206	19.105	19.473	18.447	17.791	19.088	17.327	19.758	19.651	17.706	15.45	17.216	17.707	17.285	16.788	24.481	41.488	41.409
441.5	15.233	17.313	19.097	18.5	17.487	16.319	17.084	15.001	15.172	17.879	17.933	19.993	19.999	18.727	19.305	18.919	19.493	18.434	17.863	19.171	17.472	19.689	19.547	17.534	15.319	17.16	17.648	17.218	16.774	24.995	41.674	42.03
442	15.001	17.079	18.962	18.404	17.156	16.333	17.105	15.043	15.155	17.785	17.828	20.007	20.059	18.54	19.317	18.723	19.287	18.461	17.913	19.26	17.614	19.695	19.651	17.478	15.196	16.876	17.488	17.163	16.683	25.929	41.804	42.751
442.5	14.929	16.98	18.842	18.318	16.888	16.323	17.116	15.118	15.114	17.715	17.729	19.885	20.001	18.63	19.405	18.736	19.105	18.516	17.922	19.257	17.753	19.69	19.828	17.574	15.165	16.696	17.438	17.198	16.644	26.376	41.782	43.261
443	14.895	17.012	18.795	18.278	16.811	16.301	17.105	15.161	15.07	17.666	17.71	19.825	19.871	18.815	19.429	18.829	19.047	18.69	17.908	19.182	17.825	19.771	19.985	17.713	15.185	16.659	17.451	17.245	16.64	26.293	41.69	43.224
443.5	14.968	17.044	18.655	18.243	16.824	16.247	17.099	15.184	15.041	17.762	17.871	19.907	19.825	19.087	19.382	19.077	19.048	18.778	17.909	19.064	17.835	19.812	20.137	17.881	15.371	16.701	17.46	17.247	16.665	26.229	41.6	42.858
444	15.036	17.137	18.586	18.311	16.891	16.146	16.964	15.278	15.055	17.837	18.052	20.19	19.853	19.243	19.277	19.168	19.099	18.775	17.928	18.962	17.768	19.931	20.079	17.868	15.485	16.827	17.504	17.242	16.731	26.175	41.251	42.436
444.5	15.149	17.157	18.648	18.442	16.92	16.141	16.807	15.341	15.01	18.019	18.147	20.469	19.993	19.039	19.16	19.169	19.099	18.761	18.005	18.859	17.672	20.057	19.957	17.728	15.534	16.832	17.438	17.204	16.781	26.366	41	42.347
445	15.378	17.179	18.828	18.44	16.912	16.191	16.735	15.357	15.005	18.233	18.231	20.682	20.155	18.818	19.053	19.005	19.08	18.636	18.047	18.826	17.593	20.155	19.863	17.581	15.363	16.86	17.395	17.23	16.846	26.288	41.536	42.594
445.5	15.492	17.219	18.995	18.438	16.884	16.279	16.78	15.308	14.985	18.362	18.16	20.74	20.246	18.744	19.065	18.815	19.22	18.47	18.076	18.722	17.474	20.251	19.785	17.543	15.214	16.887	17.418	17.271	16.857	25.937	42.006	42.958
446	15.503	17.277	18.983	18.341	16.816	16.382	16.956	15.159	14.902	18.455	18.1	20.846	20.274	18.695	18.965	18.644	19.296	18.364	18.093	18.72	17.438	20.236	19.757	17.604	15.218	16.939	17.497	17.323	16.868	25.928	42.629	43.184
446.5	15.313	17.331	18.797	18.285	16.827	16.425	17.069	15.038	14.859	18.357	18.066	21.018	20.215	18.747	18.923	18.478	19.346	18.295	18.01	18.646	17.441	20.211	19.738	17.676	15.412	16.979	17.633	17.33	16.914	26.142	42.864	43.109
447	15.184	17.355	18.656	18.325	16.909	16.463	17.002	14.972	14.886	18.194	18.086	21.146	20.147	18.767	19.021	18.495	19.533	18.42	17.998	18.608	17.479	20.209	19.829	17.814	15.64	16.956	17.626	17.291	16.877	26.601	42.506	42.776
447.5	15.261	17.445	18.689	18.42	17.151	16.459	16.939	14.881	14.923	18.078	18.203	21.277	20.124	18.827	19.287	18.725	19.779	18.655	18.075	18.639	17.668	20.301	20.014	17.856	15.759	16.926	17.589	17.25	16.863	26.84	42.243	42.552
448	15.348	17.381	18.69	18.488	17.331	16.418	16.916	14.956	14.965	18.136	18.231	21.273	20.285	18.939	19.63	19.024	20.021	18.717	18.142	18.638	17.704	20.47	20.072	17.819	15.649	16.983	17.583	17.17	16.795	27.027	41.875	42.402
448.5	15.398	17.254	18.719	18.506	17.435	16.382	16.969	15.12	14.931	18.186	18.258	21.343	20.456	19.044	19.797	19.211	20.024	18.746	18.182	18.69	17.745	20.589	20.012	17.751	15.515	17.042	17.668	17.148	16.742	26.669	41.592	42.583
449	15.396	17.133	18.724	18.426	17.429	16.322	17.056	15.305	14.938	18.308	18.156	21.341	20.537	19.006	19.746	19.23	19.71	18.696	18.155	18.741	17.701	20.492	19.779	17.679	15.412	17.004	17.778	17.117	16.774	26.276	41.447	42.73
449.5	15.438	17.023	18.756	18.418	17.365	16.28	17.139	15.445	14.976	18.348	18.049	21.318	20.509	18.977	19.644	19.112	19.415	18.643	18.036	18.796	17.635	20.417	19.615	17.633	15.321	16.872	17.731	17.127	16.808	26.07	41.629	43.067
450	15.586	17.146	18.849	18.593	17.374	16.242	17.212	15.428	15.027	18.398	17.901	21.326	20.317	18.992	19.599	19.121	19.264	18.633	17.95	18.815	17.64	20.388	19.641	17.595	15.337	16.785	17.619	17.237	16.849	25.99	41.59	42.989
450.5	15.661	17.258	18.806	18.677	17.332	16.297	17.277	15.318	15.022	18.43	17.881	21.416	20.291	19.098	19.709	19.166	19.355	18.567	17.972	18.844	17.65	20.53	19.744	17.545	15.336	16.76	17.453	17.293	16.845	25.959	41.552	42.599
451	15.614	17.287	18.737	18.651	17.228	16.33	17.262	15.261	15.045	18.337	17.91	21.588	20.44	19.077	19.716	19.183	19.406	18.538	18	18.828	17.669	20.691	19.906	17.569	15.395	16.845	17.385	17.338	16.818	26.146	41.431	42.39
451.5	15.443	17.237	18.666	18.435	17.14	16.306	17.12	15.3	15.115	18.301	18.012	21.647	20.534	19.008	19.61	19.178	19.492	18.599	18.118	18.763	17.633	20.678	19.979	17.657	15.446	16.949	17.409	17.347	16.796	26.082	41.098	42.311
452	15.307	17.164	18.644	18.28	17.127	16.295	17.018	15.348	15.211	18.208	18.034	21.685	20.529	19.113	19.546	19.241	19.477	18.728	18.2	18.76	17.608	20.564	20.026	17.739	15.459	16.965	17.503	17.343	16.856	25.985	41.029	42.365
452.5	15.318	17.141	18.804	18.276	17.16	16.307	17	15.421	15.346	18.142	17.955	21.647	20.378	19.352	19.518	19.327	19.51	18.798	18.207	18.675	17.56	20.437	19.975	17.734	15.459	16.874	17.593	17.325	16.925	25.649	41.074	42.624
453	15.393	17.229	19.013	18.377	17.228	16.369	17.013	15.406	15.38	18.097	17.9	21.711	20.23	19.562	19.608	19.378	19.527	18.82	18.332	18.639	17.64	20.313	19.934	17.631	15.404	16.674	17.639	17.279	17.006	24.844	41.052	42.582
453.5	15.42	17.153	19.05	18.385	17.113	16.438	17.041	15.442	15.393	18.106	17.869	21.843	20.289	19.512	19.632	19.355	19.446	18.762	18.465	18.626	17.735	20.392	19.937	17.623	15.362	16.463	17.528	17.228	17.063	24.098	40.81	42.44
454	15.439	17.148	18.879	18.251	17.03	16.485	17.029	15.455	15.375	18.175	17.903	21.883	20.461	19.173	19.57	19.282	19.422	18.704	18.525	18.59	17.808	20.584	19.945	17.724	15.273	16.401	17.476	17.195	17.135	23.995	40.865	42.651
454.5	15.385	17.102	18.534	18.116	16.944	16.566	17.033	15.497	15.363	18.317	17.966	21.88	20.543	18.893	19.452	19.223	19.403	18.736	18.408	18.576	17.801	20.713	20.055	17.828	15.28	16.415	17.354	17.214	17.186	24.601	40.958	42.767
455	15.419	17.007	18.393	18.07	16.83	16.591	17.02	15.539	15.319	18.312	17.919	21.665	20.437	18.81	19.311	19.128	19.342	18.72	18.14	18.513	17.662	20.707	20.083	17.855	15.322	16.497	17.293	17.281	17.213	25.547	41.243	42.653
455.5	15.506	16.943	18.329	18.198	16.814	16.511	16.923	15.555	15.28	18.257	17.781	21.389	20.267	18.844	19.257	19.112	19.271	18.695	17.907	18.485	17.49	20.609	20.008	17.816	15.418	16.621	17.336	17.329	17.085	26.5	41.367	42.637
456	15.53	16.783	18.273	18.281	16.699	16.324	16.783	15.545	15.221	18.187	17.714	21.136	20.134	18.849	19.239	19.112	19.2	18.779	17.949	18.488	17.405	20.528	19.867	17.737	15.51	16.82	17.423	17.443	16.94	26.896	41.095	42.31
456.5	15.593	16.761	18.281	18.426	16.75	16.198	16.747	15.483	15.194	18.211	17.812	21.08	20.212	18.88	19.282	19.167	19.167	18.766	18.036	18.441	17.356	20.547	19.728	17.712	15.48	16.886	17.509	17.464	16.834	26.899	41.159	42.18
457	15.554	16.86	18.318	18.482	16.869	16.141	16.806	15.337	15.159	18.211	18.019	21.308	20.35	18.898	19.327	19.184	19.192	18.797	18.13	18.392	17.391	20.616	19.742	17.739	15.482	16.92	17.614	17.439	16.799	26.458	41.47	42.495
457.5	15.427	16.862	18.449	18.428	16.873	16.25	16.949	15.277	15.135	18.237	18.235	21.579	20.347	18.985	19.369	19.16	19.255	18.812	18.146	18.325	17.509	20.614	19.842	17.753	15.417	16.971	17.691	17.423	16.838	25.868	41.843	42.506
458	15.358	16.963	18.63	18.278	16.947	16.341	17.108	15.237	15.091	18.339	18.207	21.751	20.312	19.052	19.394	19.041	19.26	18.656	18.112	18.231	17.625	20.642	19.983	17.772	15.392	16.981	17.7	17.323	16.809	25.617	41.993	42.454
458.5	15.373	17.115	18.757	18.131	17.028	16.43	17.206	15.274	15.055	18.501	18.112	21.703	20.231	19.004	19.347	18.963	19.306	18.609	18.186	18.27	17.753	20.57	19.987	17.689	15.369	16.906	17.654	17.245	16.794	25.47	41.561	42.101
459	15.421	17.211	18.898	18.1	17.143	16.474	17.227	15.333	15.104	18.648	18.076	21.598	20.243	18.951	19.241	18.945	19.422	18.615	18.263	18.297	17.809	20.483	19.965	17.625	15.351	16.687	17.513	17.14	16.756	25.777	40.961	41.801
459.5	15.498	17.294	18.997	18.179	17.294	16.494	17.163	15.421	15.227	18.587	18.051	21.485	20.252	18.714	19.161	18.937	19.463	18.66	18.337	18.263	17.767	20.428	19.967	17.67	15.354	16.482	17.376	17.135	16.815	26.042	40.551	41.638
460	15.617	17.235	19.06	18.403	17.298	16.532	17.085	15.502	15.35	18.4	18.083	21.308	20.187	18.685	19.204	19.071	19.411	18.726	18.341	18.257	17.667	20.375	20.042	17.831	15.427	16.435	17.382	17.245	16.864	26.22	40.862	41.959
460.5	15.684	17.118	19.05	18.617	17.259	16.529	17.031	15.542	15.457	18.262	18.162	21.124	20.201	18.655	19.268	19.17	19.243	18.785	18.391	18.249	17.59	20.466	20.166	17.961	15.489	16.506	17.421	17.392	16.976	26.329	41.485	42.491
461	15.741	17.221	19.105	18.713	17.207	16.511	17.077	15.512	15.433	18.265	18.146	20.965	20.226	18.784	19.431	19.222	19.045	18.825	18.399	18.324	17.562	20.535	20.24	18.01	15.554	16.613	17.485	17.374	17.024	26.383	42.193	43.157
461.5	15.634	17.322	19.137	18.708	17.144	16.441	17.088	15.477	15.39	18.299	18.132	20.972	20.289	18.924	19.505	19.327	19.081	18.914	18.474	18.447	17.575	20.579	20.285	18.012	15.52	16.7	17.536	17.286	17.021	26.363	42.436	43.606
462	15.449	17.401	19.118	18.614	17.077	16.39	17.116	15.467	15.272	18.441	18.137	21.172	20.419	19.017	19.581	19.306	19.256	18.937	18.402	18.499	17.575	20.471	20.179	17.937	15.402	16.721	17.46	17.231	16.939	26.411	42.142	43.394
462.5	15.425	17.537	19.174	18.606	17.166	16.369	17.117	15.483	15.197	18.483	18.168	21.315	20.515	19.125	19.675	19.319	19.491	18.812	18.291	18.405	17.564	20.28	20.118	17.871	15.298	16.734	17.418	17.216	16.837	26.472	41.811	43.145
463	15.409	17.587	19.134	18.592	17.195	16.354	17.16	15.513	15.163	18.57	18.335	21.438	20.631	19.113	19.764	19.263	19.516	18.69	18.193	18.307	17.498	20.116	19.999	17.707	15.211	16.782	17.422	17.247	16.78	26.439	41.47	42.809
463.5	15.365	17.423	19.058	18.562	17.088	16.306	17.155	15.463	15.199	18.564	18.397	21.367	20.54	19.018	19.853	19.116	19.355	18.611	18.186	18.231	17.55	20.029	19.978	17.583	15.285	16.826	17.39	17.158	16.718	26.449	41.259	42.726
464	15.333	17.238	19.065	18.487	17.066	16.205	17.088	15.47	15.291	18.481	18.355	21.193	20.342	18.878	19.927	19.006	19.181	18.515	18.209	18.207	17.547	20.016	19.938	17.54	15.289	16.914	17.441	17.059	16.712	26.398	41.086	42.584
464.5	15.484	17.069	19.04	18.52	17.111	16.206	17.015	15.509	15.322	18.512	18.241	21.068	20.188	18.844	19.876	18.913	19.222	18.376	18.143	18.154	17.475	19.995	19.879	17.569	15.381	16.876	17.396	16.996	16.7	26.63	41.145	42.695
465	15.73	17.102	19.026	18.561	17.24	16.289	16.928	15.59	15.284	18.561	18.145	20.965	20.162	18.865	19.681	18.865	19.232	18.313	18.039	18.106	17.425	19.986	19.905	17.707	15.457	16.812	17.396	17.055	16.78	26.756	41.13	42.915
465.5	15.928	17.304	19.017	18.591	17.369	16.373	16.878	15.595	15.196	18.627	18.116	20.978	20.305	19.028	19.432	18.868	19.267	18.321	17.943	18.088	17.353	20.057	19.977	17.808	15.519	16.786	17.478	17.179	16.905	26.659	41.602	43.292
466	15.901	17.386	19.018	18.539	17.24	16.422	16.912	15.524	15.087	18.586	18.045	20.964	20.438	19.18	19.262	18.884	19.266	18.462	17.935	18.149	17.366	20.122	20.066	17.804	15.517	16.799	17.621	17.254	16.977	26.476	41.853	43.135
466.5	15.741	17.379	19.051	18.587	17.109	16.443	17	15.452	15.103	18.375	17.984	20.884	20.45	19.353	19.191	18.968	19.358	18.583	18.014	18.171	17.364	20.142	20.113	17.773	15.502	16.826	17.705	17.335	16.979	26.227	41.959	42.894
467	15.67	17.322	19.128	18.608	17.017	16.45	17.099	15.415	15.179	18.133	17.977	20.78	20.456	19.433	19.348	19.091	19.431	18.666	18.014	18.061	17.324	20.057	20.154	17.736	15.45	16.801	17.686	17.301	16.948	26.821	41.771	42.563
467.5	15.665	17.379	19.093	18.706	17.022	16.422	17.13	15.435	15.25	18.155	18.081	20.816	20.402	19.29	19.468	19.113	19.454	18.665	18.049	17.891	17.288	19.978	20.093	17.761	15.402	16.742	17.535	17.28	16.919	27.505	41.515	42.574
468	15.608	17.445	19.015	18.687	17.145	16.286	17.054	15.42	15.226	18.319	18.189	20.927	20.36	19.208	19.54	19.189	19.432	18.622	18.055	17.847	17.254	19.843	20.064	17.79	15.32	16.658	17.377	17.216	16.889	28.107	41.38	42.702
468.5	15.508	17.4	19.088	18.713	17.284	16.143	17.017	15.355	15.062	18.447	18.237	20.975	20.371	19.195	19.687	19.172	19.421	18.573	18.09	17.927	17.384	19.769	19.978	17.763	15.232	16.599	17.362	17.142	16.858	28.294	41.361	42.745
469	15.514	17.383	19.134	18.855	17.467	16.17	17.062	15.3	14.998	18.483	18.298	20.951	20.366	19.317	19.795	19.141	19.495	18.598	18.106	18.044	17.465	19.841	19.922	17.755	15.243	16.602	17.357	17.173	16.885	27.673	41.284	42.644
469.5	15.537	17.326	19.233	18.813	17.594	16.306	17.117	15.241	14.975	18.399	18.318	20.765	20.394	19.501	20.002	19.254	19.446	18.652	17.984	18	17.508	19.911	19.983	17.764	15.276	16.592	17.375	17.238	16.984	27.193	41.128	42.686
470	15.566	17.335	19.209	18.652	17.592	16.443	17.11	15.203	15.067	18.469	18.357	20.738	20.456	19.576	20.122	19.307	19.438	18.739	17.861	17.867	17.562	20.079	20.043	17.796	15.324	16.606	17.287	17.332	17.043	26.912	40.868	42.533
470.5	15.563	17.426	19.082	18.39	17.474	16.507	17.039	15.306	15.201	18.578	18.406	20.771	20.503	19.441	20.117	19.355	19.371	18.711	17.73	17.716	17.544	20.164	20.139	17.812	15.359	16.669	17.19	17.374	16.998	27.116	40.682	42.5
471	15.516	17.441	19.037	18.188	17.34	16.51	16.944	15.437	15.321	18.597	18.363	20.833	20.582	19.33	20.084	19.449	19.367	18.637	17.671	17.632	17.541	20.059	20.225	17.891	15.417	16.74	17.176	17.373	16.858	27.534	40.737	42.484
471.5	15.489	17.418	18.958	18.236	17.175	16.483	17.007	15.546	15.383	18.552	18.37	20.905	20.644	19.136	19.981	19.468	19.415	18.563	17.697	17.632	17.497	19.979	20.241	17.921	15.435	16.816	17.162	17.379	16.729	27.441	41.261	42.553
472	15.392	17.318	18.91	18.304	17.096	16.421	17.1	15.538	15.378	18.442	18.283	20.862	20.591	19.146	19.955	19.645	19.532	18.516	17.702	17.666	17.348	19.873	20.175	17.924	15.401	16.858	17.228	17.356	16.652	27.083	41.732	42.587
472.5	15.311	17.323	18.958	18.393	17.122	16.388	17.235	15.496	15.337	18.372	18.185	20.759	20.468	19.249	20.003	19.718	19.655	18.616	17.769	17.717	17.298	19.886	20.103	17.807	15.314	16.789	17.225	17.324	16.625	26.609	41.786	42.443
473	15.297	17.398	19.072	18.476	17.162	16.368	17.346	15.434	15.251	18.286	18.139	20.674	20.344	19.309	19.987	19.715	19.689	18.745	17.859	17.814	17.268	19.937	20.068	17.66	15.326	16.735	17.255	17.282	16.633	26.215	41.491	42.396
473.5	15.431	17.575	19.188	18.579	17.332	16.349	17.328	15.418	15.255	18.298	18.14	20.608	20.351	19.366	19.853	19.51	19.649	18.781	17.897	17.994	17.253	19.875	20.037	17.616	15.405	16.693	17.322	17.294	16.679	26.329	41.432	42.445
474	15.485	17.617	19.284	18.563	17.396	16.337	17.281	15.413	15.291	18.382	18.182	20.596	20.498	19.398	19.639	19.357	19.662	18.732	17.965	18.051	17.251	19.798	19.982	17.695	15.503	16.673	17.356	17.323	16.75	26.375	41.518	42.789
474.5	15.555	17.495	19.266	18.522	17.414	16.325	17.181	15.431	15.31	18.402	18.206	20.573	20.536	19.5	19.457	19.222	19.724	18.64	17.96	18.057	17.193	19.685	19.941	17.758	15.538	16.71	17.433	17.401	16.789	26.458	41.643	42.953
475	15.556	17.346	19.193	18.449	17.351	16.348	17.099	15.432	15.281	18.486	18.284	20.601	20.538	19.546	19.459	19.233	19.837	18.581	17.969	18.033	17.159	19.52	19.87	17.787	15.459	16.68	17.42	17.403	16.781	26.728	41.498	43.178
475.5	15.59	17.252	19.16	18.419	17.241	16.421	17.057	15.378	15.171	18.499	18.329	20.669	20.469	19.521	19.52	19.319	19.92	18.581	17.978	17.947	17.107	19.409	19.861	17.742	15.416	16.665	17.396	17.363	16.762	27.014	41.093	43.095
476	15.616	17.284	19.025	18.369	17.183	16.46	17.076	15.3	15.106	18.54	18.379	20.716	20.549	19.521	19.76	19.37	19.889	18.6	17.93	18.008	17.131	19.376	19.933	17.686	15.416	16.65	17.429	17.348	16.79	27.349	40.696	42.956
476.5	15.682	17.376	19.051	18.4	17.211	16.452	17.122	15.316	15.125	18.569	18.388	20.622	20.612	19.492	19.898	19.366	19.866	18.644	17.893	18.027	17.2	19.559	19.94	17.688	15.431	16.66	17.544	17.306	16.835	27.335	40.524	42.663
477	15.748	17.436	19.12	18.452	17.342	16.433	17.168	15.431	15.22	18.482	18.328	20.434	20.6	19.629	19.96	19.326	19.891	18.655	17.888	18.021	17.208	19.847	19.945	17.745	15.452	16.664	17.634	17.291	16.878	27.062	40.448	42.342
477.5	15.837	17.42	19.138	18.574	17.414	16.465	17.227	15.543	15.335	18.43	18.253	20.334	20.486	19.779	19.959	19.375	19.951	18.65	17.893	17.995	17.185	19.974	19.842	17.769	15.356	16.601	17.693	17.304	16.851	26.948	40.696	42.092
478	15.77	17.456	19.152	18.652	17.371	16.606	17.28	15.57	15.392	18.454	18.189	20.344	20.377	19.852	19.895	19.472	20.034	18.628	17.901	17.969	17.188	19.877	19.739	17.724	15.284	16.549	17.626	17.296	16.796	26.931	41	41.745
478.5	15.639	17.448	19.011	18.652	17.258	16.757	17.323	15.54	15.341	18.508	18.18	20.482	20.405	19.763	19.929	19.552	20.004	18.614	17.813	17.945	17.213	19.648	19.732	17.617	15.241	16.497	17.482	17.347	16.775	27.086	41.242	41.556
479	15.649	17.517	18.984	18.597	17.146	16.813	17.339	15.49	15.218	18.564	18.223	20.561	20.491	19.648	19.942	19.619	19.95	18.57	17.671	17.969	17.247	19.484	19.763	17.508	15.221	16.538	17.444	17.341	16.787	27.013	41.577	41.549
479.5	15.704	17.476	19.014	18.62	17.099	16.697	17.315	15.418	15.094	18.524	18.308	20.65	20.658	19.579	19.947	19.674	19.913	18.573	17.664	17.946	17.243	19.516	19.801	17.484	15.253	16.552	17.442	17.291	16.809	26.985	41.705	41.557
480	15.786	17.358	19.035	18.628	17.075	16.522	17.261	15.373	15.084	18.464	18.39	20.717	20.745	19.68	20.012	19.811	19.969	18.555	17.752	17.909	17.2	19.628	19.855	17.572	15.285	16.567	17.499	17.23	16.803	27.1	41.841	41.815
480.5	15.756	17.274	19.018	18.653	17.11	16.471	17.224	15.353	15.188	18.43	18.497	20.771	20.795	19.724	20.113	19.865	20.034	18.589	17.8	17.859	17.168	19.719	19.935	17.61	15.367	16.646	17.524	17.208	16.778	27.254	41.819	42.034
481	15.732	17.287	19.044	18.662	17.128	16.465	17.201	15.375	15.284	18.406	18.563	20.753	20.714	19.755	20.224	19.865	20.133	18.664	17.819	17.846	17.129	19.747	20.042	17.653	15.428	16.632	17.414	17.239	16.715	27.312	41.324	41.936
481.5	15.764	17.424	19.038	18.671	17.132	16.519	17.167	15.406	15.32	18.445	18.546	20.654	20.645	19.703	20.254	19.734	20.142	18.698	17.733	17.808	17.123	19.649	20.155	17.624	15.489	16.626	17.232	17.294	16.697	27.125	40.989	42.012
482	15.795	17.481	19.096	18.654	17.053	16.525	17.148	15.458	15.312	18.527	18.51	20.604	20.637	19.667	20.198	19.704	20.08	18.699	17.734	17.758	17.134	19.553	20.202	17.599	15.478	16.583	17.107	17.276	16.683	27.008	40.78	41.961
482.5	15.769	17.51	19.112	18.612	16.952	16.446	17.153	15.473	15.297	18.624	18.483	20.618	20.597	19.762	20.183	19.786	19.961	18.671	17.775	17.778	17.196	19.432	20.124	17.565	15.434	16.575	17.073	17.228	16.735	26.923	40.728	41.927
483	15.696	17.471	19.064	18.526	16.966	16.4	17.199	15.473	15.266	18.696	18.469	20.612	20.598	19.758	20.16	19.884	19.849	18.665	17.793	17.854	17.267	19.368	20.032	17.569	15.342	16.667	17.189	17.214	16.813	27.076	40.721	41.722
483.5	15.68	17.515	19.094	18.526	17.088	16.43	17.269	15.468	15.22	18.747	18.483	20.65	20.63	19.757	20.176	20.014	19.844	18.657	17.761	17.964	17.296	19.377	19.98	17.592	15.258	16.677	17.292	17.247	16.884	27.246	40.382	41.225
484	15.644	17.615	19.099	18.554	17.235	16.504	17.317	15.432	15.232	18.805	18.496	20.69	20.683	19.678	20.161	20.027	19.918	18.705	17.792	18.034	17.35	19.43	19.991	17.655	15.264	16.687	17.409	17.347	16.948	27.306	40.084	41.012
484.5	15.728	17.674	19.18	18.566	17.31	16.611	17.32	15.468	15.316	18.866	18.535	20.776	20.776	19.668	20.199	20.046	20.078	18.731	17.818	18.036	17.347	19.484	20.011	17.648	15.356	16.665	17.446	17.381	16.945	27.468	40.141	41.238
485	15.766	17.693	19.196	18.567	17.27	16.629	17.304	15.458	15.331	18.919	18.551	20.854	20.738	19.705	20.238	20.003	20.089	18.62	17.82	17.991	17.373	19.554	20.058	17.607	15.399	16.678	17.447	17.408	16.937	27.474	40.449	41.578
485.5	15.808	17.667	19.136	18.573	17.161	16.614	17.245	15.487	15.316	18.93	18.557	20.773	20.666	19.804	20.357	19.977	20.051	18.54	17.787	17.957	17.409	19.566	20.073	17.633	15.437	16.657	17.443	17.397	16.883	27.405	40.865	41.853
486	15.806	17.626	19.056	18.629	17.161	16.595	17.208	15.49	15.26	18.926	18.615	20.706	20.687	19.787	20.354	19.867	19.943	18.507	17.806	17.892	17.41	19.563	20.123	17.685	15.47	16.621	17.459	17.391	16.881	27.336	41.069	41.895
486.5	15.714	17.556	18.964	18.591	17.175	16.576	17.196	15.502	15.285	18.891	18.655	20.633	20.763	19.811	20.414	19.853	19.988	18.567	17.889	17.844	17.426	19.535	20.131	17.798	15.491	16.543	17.544	17.421	16.908	27.194	40.868	41.814
487	15.691	17.54	18.918	18.512	17.182	16.581	17.202	15.502	15.391	18.87	18.676	20.651	20.843	19.865	20.402	19.887	20.12	18.685	17.952	17.893	17.382	19.473	20.093	17.827	15.499	16.509	17.586	17.479	16.939	27.082	40.625	41.817
487.5	15.706	17.591	18.909	18.527	17.249	16.564	17.195	15.466	15.433	18.818	18.658	20.699	20.898	19.925	20.299	19.885	20.223	18.722	17.959	17.909	17.325	19.46	20.133	17.788	15.438	16.537	17.558	17.548	16.967	27.058	40.551	41.748
488	15.759	17.672	18.966	18.58	17.275	16.526	17.163	15.465	15.429	18.891	18.657	20.743	20.932	19.988	20.185	19.882	20.251	18.665	17.914	17.992	17.306	19.497	20.172	17.768	15.41	16.519	17.467	17.616	16.996	27.125	40.627	41.852
488.5	15.853	17.735	19.018	18.642	17.266	16.519	17.147	15.454	15.373	19.009	18.714	20.848	21.008	20.065	20.088	19.82	20.29	18.659	17.923	18.016	17.298	19.46	20.201	17.743	15.417	16.553	17.384	17.606	16.992	27.274	40.794	41.933
489	15.947	17.737	19.074	18.615	17.266	16.529	17.173	15.463	15.331	19.101	18.779	20.901	21.068	20.129	20.189	19.874	20.331	18.663	17.973	18.027	17.342	19.448	20.254	17.796	15.439	16.564	17.406	17.573	16.974	27.378	40.945	42.155
489.5	16.023	17.721	19.078	18.574	17.21	16.546	17.194	15.457	15.316	19.179	18.856	20.938	21.101	20.147	20.422	19.913	20.34	18.697	17.953	18.016	17.404	19.462	20.279	17.878	15.428	16.637	17.488	17.542	16.981	27.181	41.033	42.257
490	16.036	17.667	18.995	18.551	17.137	16.514	17.174	15.446	15.311	19.201	18.92	20.94	21.13	20.116	20.513	19.922	20.262	18.743	17.951	18.057	17.466	19.527	20.346	17.875	15.418	16.744	17.524	17.532	16.928	27.066	41.219	42.12
490.5	15.929	17.57	18.929	18.506	17.077	16.486	17.133	15.465	15.353	19.28	18.973	20.983	21.192	20.084	20.52	20.005	20.207	18.747	17.932	18.117	17.474	19.632	20.376	17.888	15.434	16.803	17.56	17.515	16.912	27.161	41.166	41.849
491	15.848	17.474	18.863	18.458	17.103	16.481	17.114	15.539	15.438	19.325	19.005	21.035	21.261	20.09	20.36	20.107	20.246	18.739	18.013	18.164	17.429	19.683	20.343	17.873	15.485	16.825	17.529	17.507	16.897	27.382	40.993	41.533
491.5	15.833	17.497	18.896	18.516	17.242	16.509	17.197	15.643	15.499	19.25	18.936	21.017	21.232	20.094	20.237	20.216	20.265	18.802	18.154	18.143	17.428	19.689	20.291	17.951	15.513	16.767	17.474	17.473	16.872	27.545	40.822	41.321
492	15.902	17.631	19.006	18.638	17.416	16.529	17.282	15.689	15.542	19.177	18.909	21.033	21.197	20.112	20.223	20.26	20.367	18.859	18.236	18.096	17.464	19.692	20.285	18.004	15.538	16.698	17.411	17.487	16.85	27.746	40.68	41.418
492.5	15.956	17.732	19.135	18.748	17.504	16.572	17.375	15.72	15.519	19.183	18.883	21.094	21.209	20.169	20.24	20.122	20.47	18.954	18.302	18.083	17.522	19.674	20.224	17.95	15.502	16.57	17.356	17.536	16.844	27.899	40.736	41.657
493	15.942	17.733	19.253	18.73	17.46	16.61	17.405	15.675	15.552	19.265	18.923	21.242	21.31	20.191	20.341	20.093	20.601	18.97	18.242	18.102	17.574	19.608	20.197	17.888	15.505	16.573	17.407	17.55	16.864	27.819	40.776	42.073
493.5	15.964	17.651	19.307	18.667	17.476	16.671	17.397	15.695	15.669	19.418	19.01	21.361	21.45	20.167	20.433	20.054	20.645	18.914	18.174	18.169	17.583	19.57	20.213	17.888	15.553	16.69	17.497	17.553	16.929	27.718	40.733	42.466
494	15.97	17.592	19.317	18.623	17.483	16.682	17.376	15.737	15.832	19.456	19.025	21.402	21.554	20.112	20.489	20.112	20.556	18.837	18.144	18.221	17.662	19.508	20.324	17.947	15.625	16.868	17.59	17.539	17.017	27.506	40.699	42.462
494.5	15.965	17.568	19.256	18.604	17.442	16.669	17.357	15.783	15.92	19.507	19.071	21.409	21.626	20.093	20.503	20.144	20.363	18.804	18.142	18.213	17.723	19.536	20.477	18	15.696	16.964	17.662	17.547	17.065	27.563	40.635	42.205
495	15.958	17.588	19.2	18.68	17.316	16.662	17.38	15.833	15.928	19.537	19.106	21.422	21.673	20.21	20.55	20.145	20.315	18.849	18.205	18.17	17.753	19.574	20.543	17.988	15.703	16.927	17.696	17.589	17.119	27.822	40.731	41.919
495.5	15.926	17.622	19.179	18.749	17.261	16.686	17.419	15.877	15.901	19.587	19.17	21.475	21.707	20.326	20.649	20.173	20.392	18.93	18.277	18.149	17.762	19.638	20.428	17.939	15.681	16.863	17.721	17.616	17.154	27.898	40.785	41.809
496	15.925	17.682	19.188	18.786	17.209	16.728	17.489	15.884	15.889	19.621	19.233	21.548	21.748	20.356	20.72	20.198	20.556	19.007	18.337	18.192	17.78	19.719	20.304	17.88	15.611	16.748	17.636	17.667	17.164	27.95	40.898	41.93
496.5	15.933	17.743	19.23	18.753	17.258	16.773	17.553	15.93	15.978	19.661	19.279	21.605	21.854	20.359	20.737	20.338	20.696	19.072	18.419	18.27	17.81	19.722	20.293	17.876	15.572	16.651	17.595	17.733	17.206	27.866	41.088	42.115
497	16.026	17.849	19.244	18.728	17.293	16.795	17.571	16.001	16.118	19.746	19.342	21.628	21.936	20.368	20.675	20.369	20.79	19.106	18.474	18.365	17.848	19.793	20.388	17.92	15.573	16.653	17.614	17.803	17.243	27.836	41.248	42.338
497.5	16.188	17.949	19.253	18.76	17.338	16.814	17.58	16.079	16.281	19.912	19.477	21.723	22.028	20.384	20.64	20.306	20.836	19.122	18.507	18.416	17.835	19.826	20.549	18.014	15.616	16.722	17.715	17.812	17.293	27.665	41.216	42.619
498	16.313	18.063	19.289	18.854	17.428	16.839	17.646	16.197	16.394	20.108	19.628	21.813	22.119	20.394	20.707	20.18	20.871	19.101	18.478	18.425	17.82	19.844	20.645	18.095	15.685	16.893	17.887	17.808	17.306	27.637	41.009	42.824
498.5	16.391	18.1	19.372	18.951	17.513	16.866	17.66	16.249	16.439	20.268	19.728	21.872	22.214	20.346	20.802	20.152	20.819	19.057	18.408	18.403	17.837	19.873	20.702	18.174	15.751	16.951	17.93	17.786	17.329	27.579	40.678	42.886
499	16.349	18.07	19.43	18.909	17.575	16.888	17.591	16.334	16.492	20.372	19.72	21.873	22.394	20.23	20.86	20.21	20.764	19.08	18.41	18.381	17.895	19.869	20.74	18.244	15.812	16.903	17.944	17.811	17.33	27.825	40.788	42.791
499.5	16.385	18.059	19.524	18.864	17.649	16.915	17.5	16.378	16.549	20.44	19.69	21.875	22.505	20.219	20.934	20.342	20.829	19.095	18.476	18.374	17.989	19.904	20.725	18.296	15.819	16.827	17.952	17.843	17.314	28.072	40.829	42.772
500	16.426	18.13	19.588	18.853	17.584	16.957	17.441	16.451	16.674	20.478	19.687	21.979	22.502	20.267	20.921	20.44	20.962	19.155	18.617	18.454	17.994	19.906	20.703	18.331	15.876	16.755	17.98	17.881	17.344	28.284	41.048	42.89
500.5	16.484	18.205	19.638	18.883	17.515	17.024	17.44	16.544	16.783	20.405	19.747	22.105	22.416	20.426	20.958	20.528	21.074	19.236	18.759	18.6	18.018	19.897	20.705	18.31	15.92	16.749	18.064	17.921	17.398	28.226	41.171	42.975
501	16.483	18.162	19.561	18.897	17.494	17.052	17.471	16.652	16.911	20.351	19.773	22.2	22.372	20.586	20.965	20.589	21.2	19.284	18.799	18.711	18.025	19.872	20.713	18.307	15.967	16.783	18.125	17.993	17.507	28.038	41.402	43.068
501.5	16.473	18.078	19.432	18.814	17.465	17.044	17.462	16.745	17.025	20.377	19.846	22.274	22.439	20.626	20.956	20.559	21.149	19.296	18.772	18.744	18.117	19.878	20.766	18.369	15.986	16.865	18.163	18.059	17.536	28.061	41.517	42.965
502	16.459	18.051	19.378	18.72	17.438	17.049	17.536	16.788	17.08	20.522	19.925	22.385	22.617	20.681	20.96	20.489	21.14	19.281	18.748	18.658	18.176	19.872	20.846	18.427	15.937	16.917	18.208	18.096	17.508	28.071	41.423	43.054
502.5	16.491	18.147	19.467	18.644	17.327	17.062	17.648	16.843	17.159	20.759	20.063	22.492	22.824	20.773	20.918	20.488	21.113	19.317	18.774	18.641	18.289	19.852	20.98	18.5	15.971	16.919	18.209	18.137	17.495	27.901	41.331	43.275
503	16.547	18.259	19.559	18.679	17.245	17.087	17.722	16.982	17.23	20.961	20.206	22.577	23.036	20.898	21.032	20.567	21.199	19.395	18.844	18.692	18.405	19.893	21.166	18.543	16.039	16.849	18.21	18.186	17.517	27.686	41.238	43.434
503.5	16.691	18.282	19.655	18.732	17.325	17.101	17.763	17.148	17.338	21.171	20.337	22.73	23.273	21.025	21.175	20.697	21.426	19.488	18.952	18.828	18.553	19.967	21.328	18.594	16.124	16.835	18.202	18.263	17.577	27.499	41.336	43.554
504	16.772	18.241	19.694	18.762	17.421	17.133	17.791	17.295	17.538	21.466	20.518	22.961	23.52	21.075	21.315	20.82	21.616	19.53	19.015	18.855	18.656	20.064	21.414	18.687	16.212	16.853	18.22	18.314	17.605	27.704	41.203	43.534
504.5	16.865	18.216	19.777	18.822	17.483	17.199	17.844	17.365	17.745	21.645	20.618	23.274	23.659	21.076	21.394	20.914	21.701	19.595	19.105	18.882	18.669	20.167	21.407	18.75	16.249	16.906	18.359	18.272	17.602	27.9	41.16	43.569
505	16.907	18.27	19.821	18.844	17.484	17.29	17.926	17.412	17.985	21.779	20.72	23.566	23.77	21.091	21.325	20.947	21.682	19.661	19.208	18.92	18.723	20.224	21.384	18.848	16.281	16.916	18.509	18.214	17.656	27.91	41.255	43.833
505.5	17	18.406	19.849	18.896	17.461	17.315	17.98	17.55	18.185	21.877	20.818	23.787	23.88	21.117	21.354	20.962	21.749	19.786	19.324	19.066	18.782	20.253	21.411	18.951	16.313	16.914	18.708	18.181	17.687	27.791	41.506	44.016
506	17.038	18.548	19.853	19.005	17.463	17.355	18.085	17.771	18.347	22.041	20.948	24.031	24.101	21.167	21.413	20.954	21.862	19.936	19.439	19.215	18.884	20.289	21.481	19.094	16.365	16.93	18.826	18.208	17.741	27.625	41.715	44.09
506.5	17.042	18.665	19.878	19.068	17.49	17.382	18.209	17.969	18.506	22.246	21.15	24.237	24.303	21.249	21.58	21.008	22.009	20.092	19.555	19.375	19.003	20.251	21.656	19.216	16.474	17.003	18.866	18.279	17.785	27.607	41.615	44.156
507	17.036	18.692	19.891	19.084	17.436	17.439	18.345	18.133	18.7	22.425	21.355	24.45	24.471	21.374	21.7	21.12	22.117	20.273	19.637	19.491	19.059	20.286	21.835	19.363	16.59	17.064	18.896	18.394	17.877	27.513	41.636	44.33
507.5	17.122	18.663	19.934	19.083	17.418	17.504	18.335	18.247	18.906	22.494	21.53	24.539	24.621	21.485	21.776	21.215	22.148	20.376	19.691	19.575	19.149	20.335	21.955	19.446	16.695	17.077	18.909	18.499	18.026	27.5	41.675	44.524
508	17.3	18.611	19.999	19.051	17.452	17.549	18.318	18.44	19.13	22.621	21.672	24.608	24.812	21.564	21.819	21.235	22.195	20.485	19.73	19.654	19.236	20.394	22.006	19.482	16.777	17.076	19.007	18.567	18.137	27.553	41.927	44.571
508.5	17.432	18.626	20.159	19.148	17.531	17.592	18.303	18.656	19.326	22.848	21.83	24.76	25.106	21.604	21.873	21.318	22.346	20.526	19.771	19.681	19.297	20.515	21.961	19.478	16.898	17.122	19.142	18.593	18.196	27.954	41.984	44.466
509	17.58	18.689	20.41	19.244	17.676	17.639	18.297	18.863	19.546	23.062	22.002	24.995	25.349	21.628	21.925	21.396	22.532	20.553	19.866	19.705	19.394	20.629	21.949	19.488	16.995	17.167	19.257	18.609	18.27	28.329	42.051	44.397
509.5	17.741	18.832	20.607	19.442	17.717	17.719	18.331	18.98	19.687	23.26	22.196	25.282	25.547	21.784	21.96	21.583	22.745	20.641	19.959	19.732	19.507	20.761	22.056	19.609	17.094	17.187	19.385	18.65	18.329	28.611	42.205	44.609
510	17.836	18.963	20.646	19.514	17.73	17.824	18.378	19.15	19.85	23.501	22.43	25.606	25.76	21.98	21.987	21.711	22.982	20.786	20.04	19.788	19.686	20.868	22.258	19.798	17.211	17.151	19.508	18.719	18.357	28.724	42.185	44.821
510.5	17.975	19.093	20.578	19.556	17.723	17.955	18.48	19.321	20.063	23.756	22.66	25.825	26.006	22.122	21.998	21.814	23.109	20.973	20.109	19.878	19.879	20.888	22.481	19.968	17.334	17.132	19.62	18.753	18.367	28.753	42.193	44.922
511	18.027	19.205	20.602	19.521	17.8	18.062	18.597	19.517	20.301	24.053	22.965	26.128	26.218	22.268	22.081	21.973	23.251	21.127	20.166	20.037	20.032	20.868	22.663	20.183	17.512	17.142	19.69	18.833	18.384	28.669	42.172	44.966
511.5	18.086	19.289	20.695	19.495	17.874	18.156	18.733	19.707	20.583	24.263	23.249	26.395	26.385	22.391	22.208	22.092	23.404	21.272	20.291	20.221	20.18	20.868	22.798	20.378	17.653	17.189	19.698	18.909	18.468	28.541	42.237	44.94
512	18.16	19.448	20.937	19.543	17.992	18.202	18.866	19.934	20.846	24.449	23.461	26.691	26.617	22.592	22.435	22.219	23.577	21.439	20.435	20.461	20.376	20.894	22.899	20.502	17.774	17.279	19.804	18.956	18.595	28.554	42.571	45.212
512.5	18.194	19.556	21.055	19.543	18.022	18.225	18.95	20.18	21.058	24.625	23.62	26.914	26.924	22.794	22.601	22.304	23.727	21.583	20.562	20.622	20.567	20.981	22.997	20.649	17.856	17.31	20.008	19.004	18.754	28.816	42.862	45.702
513	18.304	19.742	21.134	19.548	18.086	18.292	19.002	20.369	21.295	24.862	23.78	27.114	27.31	22.909	22.717	22.396	23.893	21.739	20.663	20.778	20.714	21.096	23.098	20.776	17.889	17.359	20.26	19.05	18.947	29.077	42.964	46.229
513.5	18.444	19.791	21.194	19.573	18.128	18.419	19.051	20.517	21.519	25.115	23.996	27.415	27.615	23.032	22.841	22.534	24.023	21.833	20.717	20.918	20.761	21.244	23.209	20.996	17.938	17.366	20.435	19.158	19.089	29.087	43.027	46.77
514	18.611	19.849	21.208	19.623	18.104	18.61	19.137	20.677	21.725	25.393	24.23	27.772	27.805	23.154	22.936	22.677	24.133	22.005	20.793	21.125	20.884	21.356	23.307	21.235	18.059	17.399	20.595	19.252	19.102	29.076	43.141	47.076
514.5	18.77	19.957	21.329	19.713	18.093	18.787	19.278	20.923	21.982	25.664	24.482	28.249	28.023	23.344	23.059	22.797	24.206	22.212	20.913	21.377	21.071	21.529	23.442	21.426	18.234	17.484	20.752	19.371	19.099	29.177	43.313	47.113
515	18.885	20.067	21.418	19.79	18.066	18.922	19.404	21.202	22.234	25.955	24.791	28.667	28.215	23.585	23.223	22.925	24.359	22.459	21.105	21.599	21.279	21.668	23.572	21.621	18.457	17.569	20.92	19.495	19.135	29.552	43.46	47.166
515.5	18.949	20.236	21.652	19.895	18.156	19.052	19.537	21.435	22.553	26.218	25.167	29.085	28.42	23.796	23.447	23.076	24.631	22.728	21.345	21.736	21.381	21.745	23.728	21.817	18.682	17.638	21.072	19.624	19.264	29.863	43.45	47.036
516	19.019	20.426	21.91	20.012	18.341	19.17	19.68	21.643	22.889	26.466	25.467	29.428	28.634	24.041	23.757	23.261	25.036	22.942	21.54	21.846	21.395	21.768	23.865	22.014	18.856	17.708	21.243	19.72	19.447	30.267	43.434	47.033
516.5	19.171	20.667	22.224	20.146	18.493	19.305	19.856	21.906	23.192	26.706	25.682	29.729	28.818	24.276	23.995	23.462	25.417	23.129	21.64	21.949	21.466	21.822	23.923	22.183	18.985	17.732	21.44	19.78	19.591	30.515	43.599	47.17
517	19.446	20.916	22.526	20.266	18.588	19.469	20.02	22.202	23.428	26.973	25.857	29.968	29.088	24.487	24.158	23.655	25.715	23.298	21.695	22.1	21.676	21.939	24.067	22.309	19.074	17.796	21.624	19.87	19.763	30.782	43.957	47.597
517.5	19.644	21.061	22.67	20.338	18.617	19.614	20.151	22.481	23.673	27.364	26.124	30.256	29.352	24.73	24.333	23.876	25.988	23.457	21.754	22.32	21.94	22.052	24.245	22.471	19.207	17.886	21.741	20.001	19.92	30.759	44.355	48.238
518	19.819	21.173	22.804	20.473	18.705	19.75	20.285	22.682	23.946	27.72	26.453	30.538	29.693	24.945	24.557	24.163	26.217	23.648	21.935	22.574	22.139	22.14	24.454	22.645	19.407	17.966	21.883	20.164	20.044	30.472	44.658	49.065
518.5	19.797	21.303	22.86	20.636	18.805	19.871	20.42	22.888	24.268	28.068	26.826	30.919	30.08	25.22	24.778	24.412	26.392	23.79	22.105	22.819	22.243	22.187	24.622	22.869	19.627	18.008	22.128	20.251	20.153	30.412	44.822	49.65
519	19.828	21.502	22.94	20.779	18.909	20.005	20.589	23.148	24.533	28.322	27.143	31.35	30.412	25.497	24.982	24.644	26.596	23.967	22.171	23.033	22.385	22.288	24.77	23.117	19.822	17.972	22.355	20.291	20.17	30.668	44.826	49.815
519.5	19.925	21.711	23.055	20.873	18.918	20.166	20.727	23.406	24.767	28.55	27.443	31.824	30.703	25.731	25.162	24.855	26.807	24.244	22.224	23.238	22.656	22.329	24.951	23.354	19.999	18.022	22.63	20.296	20.225	31.2	44.762	49.74
520	20.096	21.799	23.152	20.857	18.941	20.321	20.915	23.639	25.022	28.755	27.714	32.158	30.931	26.021	25.438	25.115	27.098	24.493	22.3	23.405	23.007	22.412	25.164	23.568	20.18	18.212	22.823	20.345	20.305	31.629	44.819	49.591
520.5	20.372	21.954	23.261	20.905	19.039	20.446	21.11	23.834	25.317	28.963	27.948	32.388	31.247	26.291	25.738	25.377	27.397	24.691	22.38	23.573	23.265	22.539	25.335	23.715	20.363	18.395	23.063	20.444	20.466	31.79	44.988	49.724
521	20.597	22.038	23.373	21.004	19.121	20.614	21.315	24.083	25.668	29.258	28.267	32.673	31.561	26.596	26.082	25.539	27.755	24.851	22.516	23.792	23.379	22.812	25.432	23.911	20.563	18.568	23.356	20.548	20.657	31.882	45.128	50.233
521.5	20.802	22.219	23.498	21.129	19.21	20.816	21.494	24.385	25.971	29.64	28.623	33.036	31.862	26.842	26.322	25.674	28.087	25.064	22.594	24.022	23.457	23.044	25.512	24.123	20.774	18.635	23.566	20.674	20.861	31.874	45.514	50.812
522	20.874	22.411	23.628	21.152	19.23	21.111	21.672	24.684	26.217	30.061	28.983	33.488	32.156	27.074	26.401	25.792	28.385	25.437	22.682	24.34	23.557	23.142	25.621	24.406	21.033	18.714	23.8	20.737	20.998	32.032	45.638	51.177
522.5	20.909	22.568	23.763	21.082	19.234	21.38	21.894	24.932	26.435	30.381	29.288	33.767	32.432	27.289	26.461	26.018	28.644	25.73	22.753	24.586	23.736	23.186	25.794	24.736	21.273	18.831	23.958	20.81	21.114	31.919	45.697	51.445
523	21.008	22.784	23.873	21.091	19.364	21.542	22.068	25.096	26.613	30.618	29.586	34.044	32.682	27.543	26.51	26.297	28.846	25.975	22.778	24.773	23.927	23.241	25.897	25.013	21.491	18.891	24.149	20.855	21.191	31.922	45.702	51.62
523.5	21.191	22.96	24.002	21.219	19.459	21.652	22.22	25.217	26.824	30.823	29.812	34.326	32.849	27.686	26.652	26.576	29.046	26.166	22.879	24.956	24.186	23.325	26.012	25.284	21.7	19	24.389	20.921	21.279	32.145	45.628	51.838
524	21.452	23.173	24.213	21.422	19.568	21.758	22.303	25.404	27.003	31.106	30.043	34.671	32.966	27.852	26.789	26.782	29.228	26.46	23.052	25.151	24.44	23.498	26.116	25.489	21.916	19.073	24.628	21.039	21.43	32.446	45.93	52.162
524.5	21.651	23.416	24.508	21.569	19.607	21.895	22.379	25.579	27.174	31.397	30.309	35.079	33.13	28.073	26.921	26.914	29.439	26.732	23.285	25.349	24.61	23.617	26.299	25.704	22.152	19.098	24.819	21.132	21.547	32.846	46.327	52.33
525	21.855	23.558	24.767	21.614	19.624	22.074	22.556	25.792	27.397	31.685	30.638	35.439	33.433	28.439	27.116	27.085	29.702	26.872	23.515	25.556	24.706	23.775	26.504	25.958	22.31	19.121	24.924	21.225	21.655	33	46.682	52.667
525.5	22.011	23.677	24.923	21.69	19.675	22.256	22.745	25.958	27.59	31.956	31.023	35.812	33.822	28.834	27.383	27.317	30.018	27.034	23.711	25.77	24.769	23.922	26.712	26.163	22.408	19.171	24.97	21.282	21.758	32.762	47.087	52.793
526	22.199	23.839	24.971	21.858	19.774	22.411	22.957	26.128	27.837	32.163	31.36	36.156	34.148	29.183	27.721	27.63	30.411	27.224	23.876	25.948	24.912	24.091	26.908	26.397	22.505	19.278	25.109	21.365	21.889	32.547	47.166	53.061
526.5	22.252	23.957	25.06	21.995	19.833	22.59	23.126	26.24	28.058	32.447	31.608	36.512	34.442	29.466	28.036	27.865	30.812	27.56	23.998	26.161	25.112	24.254	27.084	26.546	22.685	19.431	25.285	21.475	22.045	32.539	47.268	53.227
527	22.33	24.14	25.159	22.09	19.94	22.778	23.227	26.357	28.269	32.702	31.904	36.868	34.616	29.611	28.24	28.106	31.119	27.868	24.099	26.319	25.247	24.386	27.202	26.688	22.869	19.541	25.565	21.592	22.173	32.773	47.276	53.329
527.5	22.416	24.203	25.3	22.139	19.988	23.006	23.338	26.404	28.401	32.987	32.167	37.22	34.782	29.824	28.396	28.297	31.375	27.985	24.087	26.43	25.343	24.484	27.301	26.814	23.067	19.642	25.816	21.683	22.255	33.214	47.285	53.483
528	22.544	24.269	25.395	22.227	20.07	23.161	23.49	26.523	28.502	33.191	32.421	37.509	34.964	29.989	28.599	28.531	31.49	28.003	24.045	26.582	25.394	24.596	27.508	26.999	23.248	19.726	26.002	21.722	22.34	33.503	47.722	53.554
528.5	22.611	24.375	25.5	22.31	20.11	23.284	23.674	26.696	28.652	33.317	32.587	37.746	35.118	30.272	28.843	28.798	31.573	27.997	23.977	26.674	25.428	24.751	27.659	27.22	23.444	19.794	26.113	21.728	22.423	33.775	47.844	53.83
529	22.565	24.503	25.572	22.338	20.131	23.401	23.828	26.912	28.861	33.536	32.716	37.94	35.254	30.481	29.009	28.957	31.666	28.129	24.072	26.829	25.534	24.916	27.805	27.429	23.653	19.829	26.135	21.77	22.532	34.032	47.697	54.101
529.5	22.598	24.634	25.543	22.33	20.157	23.541	23.887	27.154	29.157	33.687	32.846	38.045	35.345	30.684	29.086	29.151	31.807	28.3	24.247	26.958	25.619	25.04	27.884	27.584	23.782	19.915	26.199	21.827	22.621	34.029	47.44	54.502
530	22.655	24.718	25.584	22.383	20.232	23.725	23.884	27.317	29.391	33.92	33.038	38.219	35.496	30.856	29.142	29.301	32.094	28.496	24.358	27.128	25.79	25.064	27.85	27.737	23.836	19.966	26.324	21.878	22.663	33.884	47.484	54.779
530.5	22.793	24.85	25.713	22.507	20.312	23.857	23.899	27.446	29.547	33.981	33.254	38.445	35.681	31.023	29.188	29.462	32.412	28.732	24.41	27.312	26.01	25.109	27.86	27.856	23.847	20.022	26.443	21.952	22.727	33.862	47.83	54.857
531	22.904	24.927	25.856	22.578	20.423	23.929	24.072	27.537	29.649	34.152	33.439	38.763	35.986	31.174	29.313	29.645	32.639	28.968	24.414	27.48	26.222	25.139	27.787	27.985	23.872	20.102	26.654	21.988	22.778	34.292	48.038	54.857
531.5	22.987	25.093	26.008	22.656	20.5	24.011	24.299	27.66	29.75	34.358	33.557	39.015	36.191	31.259	29.416	29.726	32.743	29.208	24.481	27.639	26.389	25.211	27.871	28.061	23.993	20.18	26.815	22.067	22.934	34.637	47.97	54.669
532	23.057	25.198	26.055	22.695	20.502	24.032	24.457	27.754	29.872	34.536	33.627	39.229	36.295	31.418	29.64	29.808	32.806	29.319	24.586	27.731	26.466	25.297	28.039	28.224	24.162	20.261	26.968	22.106	23.024	34.819	47.833	54.944
532.5	23.16	25.299	26.097	22.798	20.545	24.09	24.554	27.787	29.972	34.706	33.738	39.47	36.299	31.455	29.868	29.829	32.811	29.433	24.649	27.805	26.529	25.412	28.199	28.406	24.369	20.363	27.119	22.124	23.085	34.828	47.911	55.47
533	23.239	25.37	26.122	22.846	20.533	24.155	24.6	27.793	30.061	34.711	33.969	39.573	36.306	31.563	30.044	29.936	32.942	29.618	24.672	27.876	26.561	25.594	28.294	28.596	24.532	20.457	27.27	22.166	23.094	34.911	47.951	56.099
533.5	23.351	25.298	26.151	22.824	20.556	24.254	24.65	27.804	30.165	34.707	34.148	39.587	36.346	31.692	30.177	30.086	33.105	29.781	24.662	27.965	26.563	25.781	28.33	28.685	24.605	20.556	27.44	22.15	23.091	35.081	47.908	56.27
534	23.415	25.392	26.248	22.886	20.539	24.425	24.715	27.958	30.342	34.714	34.224	39.536	36.404	31.937	30.33	30.292	33.369	29.987	24.717	28.134	26.61	25.882	28.367	28.672	24.597	20.604	27.523	22.11	23.073	34.971	47.682	55.781
534.5	23.431	25.479	26.349	23.005	20.495	24.553	24.798	28.142	30.552	34.833	34.292	39.646	36.507	32.206	30.518	30.508	33.554	30.054	24.801	28.302	26.679	25.975	28.471	28.667	24.601	20.624	27.594	22.094	23.048	34.974	47.623	55.09
535	23.45	25.668	26.489	23.125	20.545	24.674	24.842	28.219	30.677	34.908	34.459	39.925	36.606	32.305	30.661	30.676	33.619	30.133	24.854	28.417	26.792	26.026	28.597	28.721	24.654	20.673	27.659	22.139	23.058	34.815	47.778	54.848
535.5	23.468	25.82	26.6	23.208	20.624	24.78	24.929	28.276	30.694	35.028	34.78	40.238	36.756	32.286	30.764	30.809	33.697	30.177	24.846	28.429	26.866	26.078	28.725	28.834	24.785	20.709	27.788	22.256	23.135	34.684	48.081	54.902
536	23.456	25.845	26.67	23.156	20.772	24.823	25.037	28.265	30.682	35.061	35.028	40.427	36.838	32.372	30.764	30.889	33.892	30.242	24.823	28.423	26.979	26.078	28.822	28.966	24.901	20.744	27.846	22.362	23.238	34.503	48.218	55.042
536.5	23.541	25.862	26.674	23.128	20.873	24.885	25.154	28.339	30.731	35.191	35.094	40.602	36.9	32.481	30.824	30.879	34.151	30.295	24.842	28.477	27.057	26.003	28.805	28.99	24.968	20.749	27.892	22.428	23.336	34.496	48.003	55.198
537	23.579	25.865	26.64	23.064	20.896	24.893	25.18	28.411	30.878	35.341	35.094	40.738	36.895	32.608	30.898	30.869	34.258	30.422	24.951	28.683	27.132	26.012	28.788	29.014	25.043	20.757	27.994	22.479	23.369	34.87	48.129	55.483
537.5	23.612	25.901	26.623	23.003	20.845	24.9	25.175	28.472	31.086	35.425	35.08	40.86	36.892	32.653	30.947	30.838	34.258	30.48	25.013	28.817	27.116	26.1	28.727	28.985	25.139	20.74	28.087	22.54	23.42	35.002	48.443	55.71
538	23.612	26.023	26.665	22.977	20.855	24.877	25.148	28.537	31.206	35.457	35.069	40.901	36.871	32.751	30.986	30.928	34.297	30.6	25.055	28.882	27.084	26.194	28.731	29.015	25.223	20.753	28.173	22.58	23.47	34.962	48.791	55.95
538.5	23.636	26.099	26.74	23.04	20.894	24.836	25.178	28.611	31.35	35.433	35.066	40.977	36.842	32.881	30.925	31.054	34.367	30.683	25.087	28.932	27.128	26.25	28.732	29.102	25.251	20.819	28.206	22.601	23.526	34.909	48.72	56.017
539	23.745	26.172	26.821	23.061	20.977	24.875	25.229	28.659	31.407	35.423	35.011	41.017	36.89	32.996	30.81	31.051	34.435	30.729	25.143	29.009	27.246	26.246	28.76	29.167	25.218	20.865	28.165	22.594	23.552	35.177	48.36	56.155
539.5	23.784	26.236	26.922	23.107	20.992	24.96	25.305	28.706	31.468	35.449	34.961	40.994	36.958	32.957	30.801	31.034	34.469	30.746	25.152	29.135	27.349	26.282	28.8	29.276	25.196	20.936	28.207	22.574	23.522	35.456	48.287	56.326
540	23.845	26.303	26.98	23.176	20.975	25.033	25.315	28.774	31.499	35.526	35.017	40.971	37.119	32.952	30.974	31.063	34.49	30.719	25.124	29.183	27.425	26.387	28.879	29.395	25.277	20.93	28.25	22.626	23.536	35.594	48.657	56.345
540.5	23.841	26.352	26.992	23.244	21.029	25.067	25.303	28.866	31.549	35.628	35.123	40.977	37.233	33.016	31.229	31.249	34.569	30.769	25.087	29.195	27.446	26.394	28.926	29.468	25.388	21.006	28.337	22.734	23.581	35.808	48.887	56.192
541	23.837	26.293	26.944	23.226	21.01	25.031	25.335	28.986	31.485	35.728	35.35	41.076	37.346	33.113	31.411	31.477	34.659	30.8	25.078	29.168	27.468	26.329	29.01	29.545	25.481	21.071	28.35	22.758	23.642	35.961	48.802	56.149
541.5	23.857	26.258	26.937	23.139	21.048	25.007	25.418	29.029	31.413	35.726	35.508	41.18	37.366	33.243	31.414	31.668	34.802	30.838	25.119	29.149	27.457	26.282	29.058	29.572	25.494	21.131	28.25	22.688	23.667	36.018	48.455	56.196
542	23.884	26.208	26.925	22.991	21.048	25.095	25.548	29.023	31.423	35.739	35.588	41.251	37.304	33.287	31.396	31.598	34.963	30.848	25.186	29.192	27.416	26.353	29.065	29.702	25.541	21.08	28.194	22.583	23.66	35.89	48.418	56.437
542.5	23.933	26.204	26.925	22.994	21.099	25.211	25.639	29.074	31.567	35.775	35.573	41.344	37.21	33.41	31.35	31.46	35.002	30.914	25.282	29.299	27.364	26.497	29.061	29.781	25.562	21.053	28.179	22.545	23.703	35.664	48.536	56.581
543	23.955	26.173	26.885	23.059	21.181	25.311	25.633	29.2	31.707	35.831	35.61	41.423	37.152	33.532	31.369	31.377	35.085	30.962	25.307	29.405	27.387	26.701	29.072	29.816	25.625	21.005	28.196	22.577	23.731	35.647	48.619	56.526
543.5	23.96	26.229	26.871	23.142	21.185	25.359	25.606	29.29	31.7	35.935	35.675	41.473	37.239	33.593	31.33	31.419	35.09	31.003	25.3	29.435	27.407	26.758	29.109	29.781	25.67	21.009	28.275	22.612	23.833	35.526	48.731	56.249
544	24.041	26.329	26.931	23.246	21.158	25.36	25.633	29.293	31.626	35.987	35.742	41.466	37.328	33.508	31.322	31.609	35.155	31.003	25.281	29.399	27.411	26.714	29.18	29.769	25.677	21.029	28.377	22.655	23.889	35.359	48.704	56.183
544.5	24.189	26.431	27.005	23.29	21.149	25.318	25.709	29.239	31.602	36.044	35.726	41.49	37.451	33.329	31.358	31.694	35.163	31.046	25.3	29.466	27.458	26.596	29.235	29.816	25.686	21.069	28.465	22.741	23.94	35.265	48.707	56.031
545	24.235	26.465	27.002	23.296	21.102	25.325	25.792	29.226	31.685	36.1	35.642	41.534	37.473	33.255	31.453	31.732	35.142	31.133	25.368	29.541	27.471	26.562	29.275	29.898	25.677	21.146	28.523	22.858	23.919	35.345	48.786	56.041
545.5	24.217	26.532	26.895	23.244	21.107	25.361	25.834	29.298	31.768	36.134	35.617	41.614	37.538	33.306	31.638	31.734	35.212	31.17	25.409	29.592	27.583	26.626	29.284	29.96	25.693	21.266	28.553	22.895	23.839	35.579	48.918	56.005
546	24.097	26.607	26.792	23.157	21.1	25.439	25.823	29.346	31.875	36.253	35.683	41.708	37.645	33.361	31.743	31.73	35.343	31.174	25.413	29.511	27.604	26.749	29.282	29.93	25.756	21.316	28.611	22.877	23.833	35.978	48.916	56.068
546.5	24.096	26.76	26.886	23.203	21.171	25.498	25.821	29.404	31.909	36.317	35.766	41.691	37.697	33.403	31.796	31.75	35.503	31.141	25.433	29.425	27.692	26.785	29.275	29.869	25.819	21.262	28.605	22.84	23.816	36.273	48.771	56.371
547	24.188	26.876	27.135	23.339	21.285	25.579	25.881	29.374	31.941	36.344	35.791	41.665	37.738	33.509	31.758	31.878	35.659	31.14	25.454	29.421	27.795	26.733	29.268	29.854	25.853	21.183	28.648	22.82	23.827	36.257	48.417	56.603
547.5	24.319	26.922	27.37	23.497	21.287	25.666	25.928	29.356	31.915	36.349	35.771	41.698	37.677	33.635	31.651	31.947	35.682	31.202	25.606	29.482	27.892	26.742	29.231	29.921	25.902	21.105	28.7	22.839	23.847	36.301	48.079	56.751
548	24.41	26.902	27.394	23.493	21.21	25.743	25.937	29.303	31.929	36.346	35.828	41.842	37.732	33.706	31.572	31.978	35.55	31.273	25.707	29.59	27.921	26.743	29.14	29.962	25.902	21.154	28.75	22.888	23.888	36.167	48.14	56.839
548.5	24.399	26.803	27.265	23.403	21.118	25.697	25.921	29.387	32.054	36.386	35.921	41.983	37.831	33.643	31.568	31.958	35.388	31.286	25.768	29.689	27.858	26.78	29.097	30.001	25.926	21.246	28.809	22.977	23.924	36.2	48.373	56.813
549	24.275	26.712	27.153	23.28	21.139	25.618	25.916	29.479	32.14	36.452	35.981	42.061	37.904	33.684	31.667	31.91	35.375	31.245	25.737	29.789	27.822	26.858	29.15	29.969	25.941	21.281	28.832	23.051	23.908	36.338	48.717	56.79
549.5	24.191	26.701	27.112	23.333	21.232	25.592	25.905	29.58	32.236	36.426	35.988	41.981	37.883	33.837	31.759	31.937	35.39	31.262	25.662	29.826	27.843	26.899	29.208	29.917	25.928	21.291	28.91	23.098	23.891	36.162	49.032	56.656
550	24.104	26.736	27.097	23.428	21.283	25.673	25.875	29.619	32.255	36.381	36.058	41.889	37.792	33.964	31.805	31.875	35.373	31.386	25.668	29.765	27.882	26.973	29.251	29.861	25.883	21.312	29.006	23.076	23.908	35.87	49.124	56.615
550.5	24.14	26.773	27.078	23.428	21.273	25.796	25.844	29.626	32.292	36.334	36.123	41.791	37.744	33.895	31.852	31.742	35.263	31.506	25.732	29.744	27.906	26.989	29.245	29.86	25.833	21.341	28.957	23.003	23.999	35.504	49.359	56.583
551	24.248	26.791	27.096	23.378	21.197	25.841	25.866	29.668	32.373	36.379	36.151	41.751	37.766	33.783	31.841	31.737	35.206	31.618	25.8	29.753	27.913	26.983	29.268	29.963	25.876	21.406	28.899	22.96	24.109	35.388	49.548	56.604
551.5	24.379	26.802	27.192	23.375	21.217	25.837	25.932	29.644	32.38	36.5	36.117	41.894	37.86	33.734	31.825	31.815	35.295	31.602	25.785	29.826	27.972	27.012	29.376	30.117	26.035	21.383	28.832	22.962	24.158	35.614	49.413	56.627
552	24.509	26.853	27.407	23.514	21.333	25.8	26.005	29.647	32.33	36.576	36.014	41.975	37.915	33.829	31.803	32.014	35.495	31.528	25.725	29.823	28.035	26.983	29.452	30.216	26.239	21.369	28.775	23.064	24.176	35.787	49.105	56.637
552.5	24.471	26.995	27.469	23.69	21.441	25.788	25.94	29.685	32.26	36.562	36.012	42.114	37.936	33.942	31.923	32.188	35.66	31.408	25.705	29.864	28.137	26.994	29.479	30.177	26.326	21.366	28.768	23.117	24.102	35.937	48.939	56.79
553	24.405	27.044	27.412	23.704	21.412	25.759	25.844	29.804	32.221	36.528	35.952	42.12	37.951	33.992	32.048	32.172	35.666	31.319	25.713	29.922	28.141	27.006	29.508	30.119	26.297	21.341	28.762	23.142	24.102	36.004	48.885	56.723
553.5	24.374	27.032	27.28	23.643	21.225	25.696	25.773	29.84	32.182	36.435	35.887	41.962	37.9	33.859	32.06	32.137	35.579	31.365	25.688	29.977	28.051	27.056	29.541	30.026	26.155	21.321	28.775	23.101	24.104	35.897	49.102	56.704
554	24.345	26.922	27.111	23.503	21.023	25.641	25.722	29.821	32.12	36.338	35.828	41.75	37.825	33.803	31.93	32.072	35.51	31.381	25.674	29.952	27.868	27.051	29.598	30.02	26.035	21.265	28.78	23.045	24.126	35.841	49.063	56.787
554.5	24.293	26.837	27.019	23.428	21.034	25.675	25.694	29.73	32.056	36.36	35.81	41.542	37.708	33.74	31.871	32.044	35.451	31.381	25.753	29.791	27.731	26.914	29.618	30.056	25.978	21.211	28.782	22.976	24.1	35.816	48.967	57.121
555	24.238	26.849	27.029	23.377	21.098	25.687	25.644	29.695	32.066	36.478	35.891	41.53	37.7	33.808	31.83	32.065	35.441	31.35	25.846	29.707	27.74	26.853	29.591	30.113	25.964	21.161	28.826	22.908	24.079	36.031	48.82	57.27
555.5	24.256	26.893	27.081	23.347	21.128	25.647	25.641	29.697	32.11	36.535	35.928	41.664	37.748	33.805	31.89	32.064	35.344	31.373	25.856	29.708	27.789	26.792	29.46	30.067	25.977	21.12	28.896	22.922	24.091	36.001	48.644	57.061
556	24.34	26.935	27.229	23.418	21.087	25.573	25.679	29.701	32.185	36.513	35.905	41.82	37.814	33.812	31.926	32.17	35.298	31.447	25.77	29.828	27.857	26.774	29.312	29.97	25.93	21.131	28.9	22.975	24.125	35.942	48.692	56.747
556.5	24.395	26.923	27.348	23.501	21.07	25.491	25.7	29.759	32.222	36.415	35.856	41.92	37.82	33.807	31.903	32.28	35.393	31.389	25.657	29.837	27.846	26.725	29.248	29.79	25.889	21.18	28.825	23.021	24.139	35.647	48.737	56.509
557	24.401	26.817	27.393	23.489	21.091	25.471	25.716	29.794	32.285	36.349	35.779	41.962	37.79	33.844	31.822	32.249	35.457	31.338	25.581	29.756	27.809	26.676	29.273	29.65	25.784	21.222	28.711	23.051	24.151	35.535	48.837	56.598
557.5	24.329	26.729	27.38	23.412	21.11	25.407	25.695	29.82	32.328	36.323	35.757	41.897	37.716	33.755	31.691	32.041	35.398	31.208	25.557	29.547	27.708	26.684	29.422	29.581	25.718	21.215	28.679	23.078	24.113	35.55	48.96	56.723
558	24.262	26.664	27.298	23.277	21.035	25.327	25.69	29.746	32.281	36.19	35.751	41.772	37.644	33.716	31.593	31.828	35.326	31.164	25.584	29.434	27.675	26.695	29.497	29.545	25.634	21.191	28.692	23.09	24.042	35.836	48.961	56.777
558.5	24.193	26.564	27.144	23.133	20.911	25.249	25.686	29.616	32.157	36.102	35.758	41.675	37.592	33.661	31.506	31.7	35.258	31.129	25.581	29.377	27.651	26.673	29.504	29.549	25.584	21.153	28.632	23.046	23.927	36.053	48.855	56.666
559	24.2	26.536	27.056	23.097	20.856	25.161	25.602	29.527	32.043	36.057	35.797	41.632	37.502	33.554	31.469	31.655	35.35	31.067	25.551	29.262	27.665	26.641	29.364	29.553	25.474	21.112	28.561	22.975	23.921	36.092	48.622	56.414
559.5	24.166	26.486	26.959	23.079	20.86	25.074	25.455	29.483	31.949	36.097	35.759	41.664	37.405	33.439	31.442	31.599	35.466	31.012	25.522	29.103	27.628	26.656	29.191	29.516	25.408	21.002	28.444	22.888	23.961	36.062	48.514	56.49
560	24.104	26.477	26.874	23.093	20.843	24.995	25.309	29.499	31.942	36.128	35.605	41.65	37.318	33.21	31.363	31.478	35.41	30.871	25.502	28.949	27.561	26.697	29.022	29.468	25.286	20.86	28.371	22.843	23.964	36.105	48.581	56.522
560.5	24.125	26.457	26.844	23.078	20.863	24.94	25.23	29.473	31.934	35.98	35.368	41.506	37.228	33.044	31.256	31.395	35.297	30.814	25.49	28.938	27.532	26.722	28.903	29.345	25.225	20.756	28.268	22.818	23.893	36.119	48.788	56.677
561	24.156	26.387	26.837	23.018	20.83	24.877	25.246	29.439	31.928	35.766	35.242	41.365	37.226	32.908	31.104	31.237	34.962	30.734	25.431	28.92	27.525	26.647	28.858	29.202	25.227	20.758	28.22	22.817	23.801	35.874	49.019	56.494
561.5	24.231	26.31	26.88	22.978	20.804	24.767	25.246	29.434	31.931	35.603	35.219	41.145	37.126	32.814	31.007	31.073	34.635	30.663	25.366	28.867	27.54	26.534	28.828	29.031	25.221	20.778	28.114	22.856	23.776	35.499	49.131	56.276
562	24.219	26.222	26.909	22.951	20.723	24.65	25.155	29.412	31.898	35.518	35.223	40.944	37.114	32.758	30.885	30.916	34.376	30.539	25.343	28.733	27.427	26.448	28.847	28.921	25.237	20.741	28.039	22.889	23.813	35.236	48.918	56.189
562.5	24.147	26.16	26.843	22.939	20.654	24.544	25.08	29.326	31.786	35.45	35.108	40.742	37.047	32.673	30.673	30.815	34.239	30.442	25.298	28.604	27.365	26.38	28.801	28.845	25.172	20.71	27.907	22.889	23.823	35.117	48.479	56.141
563	24.044	26.153	26.787	22.945	20.663	24.49	24.951	29.191	31.625	35.254	34.939	40.583	36.95	32.542	30.517	30.695	34.224	30.396	25.286	28.518	27.216	26.247	28.732	28.809	24.977	20.702	27.778	22.82	23.778	35.17	48.051	56.246
563.5	23.921	26.168	26.689	22.923	20.692	24.427	24.845	29.1	31.424	35.108	34.714	40.467	36.851	32.363	30.437	30.501	34.156	30.352	25.316	28.505	27.189	26.089	28.653	28.717	24.781	20.74	27.762	22.734	23.72	35.108	47.835	56.197
564	23.805	26.146	26.572	22.833	20.641	24.37	24.72	29.074	31.281	35.097	34.591	40.31	36.767	32.223	30.375	30.296	34.023	30.307	25.361	28.467	27.199	26.011	28.601	28.597	24.574	20.672	27.672	22.682	23.661	34.963	47.767	56.067
564.5	23.793	26.099	26.529	22.792	20.589	24.292	24.64	29.061	31.23	35.097	34.542	40.157	36.792	32.18	30.338	30.169	33.921	30.175	25.372	28.365	27.148	26.039	28.554	28.48	24.513	20.552	27.606	22.689	23.663	34.754	47.676	55.941
565	23.821	26.074	26.536	22.854	20.561	24.199	24.578	28.943	31.216	35.072	34.509	40.044	36.758	32.072	30.157	30.11	33.757	30.056	25.277	28.184	27.047	26.093	28.549	28.394	24.515	20.388	27.409	22.703	23.624	34.414	47.761	55.896
565.5	23.861	26.063	26.532	22.97	20.609	24.125	24.501	28.815	31.182	34.988	34.523	39.971	36.687	31.956	30.032	30.053	33.626	29.91	25.176	28.072	26.884	26.017	28.507	28.337	24.396	20.283	27.258	22.685	23.566	34.061	47.767	55.591
566	23.824	25.994	26.398	22.946	20.575	24.045	24.382	28.667	31.089	34.869	34.368	39.873	36.441	31.735	29.956	29.897	33.443	29.847	25.121	28.072	26.796	25.817	28.495	28.194	24.301	20.223	27.161	22.617	23.472	33.873	47.803	55.219
566.5	23.75	25.814	26.227	22.842	20.473	23.934	24.233	28.606	31.003	34.818	34.162	39.653	36.176	31.611	29.933	29.812	33.273	29.788	25.129	28.013	26.763	25.641	28.487	28.076	24.198	20.172	27.073	22.559	23.406	34.143	47.789	54.854
567	23.555	25.56	26.094	22.661	20.354	23.754	24.076	28.546	30.947	34.694	33.914	39.314	35.893	31.437	29.924	29.681	33.129	29.675	25.115	27.934	26.757	25.547	28.426	27.944	24.086	20.159	27.027	22.449	23.289	34.47	47.635	54.604
567.5	23.387	25.334	26.037	22.484	20.338	23.619	23.915	28.492	30.849	34.604	33.703	38.954	35.711	31.29	29.766	29.522	32.966	29.476	25.067	27.764	26.702	25.526	28.343	27.866	23.953	20.089	26.951	22.387	23.175	34.633	47.482	54.734
568	23.201	25.159	25.98	22.349	20.323	23.526	23.731	28.432	30.72	34.504	33.49	38.618	35.581	31.064	29.602	29.329	32.853	29.222	24.995	27.67	26.643	25.534	28.154	27.774	23.785	19.992	26.905	22.363	23.087	34.354	47.38	54.833
568.5	23.124	25.06	25.925	22.262	20.262	23.419	23.582	28.349	30.548	34.405	33.299	38.479	35.509	30.869	29.406	29.159	32.666	29.008	24.956	27.595	26.502	25.524	28.015	27.701	23.683	19.911	26.794	22.367	23.081	33.962	47.401	54.792
569	23.073	25.012	25.934	22.303	20.112	23.32	23.496	28.243	30.439	34.203	33.127	38.35	35.433	30.714	29.199	29.031	32.493	28.897	24.95	27.509	26.319	25.477	27.899	27.608	23.618	19.894	26.679	22.394	23.083	33.74	47.472	54.406
569.5	23.018	24.961	25.801	22.329	19.983	23.169	23.484	28.097	30.354	33.958	32.989	38.248	35.371	30.495	28.98	28.924	32.23	28.825	24.923	27.316	26.132	25.355	27.866	27.484	23.505	19.901	26.541	22.304	22.996	33.459	47.425	53.669
570	22.899	24.844	25.59	22.255	19.872	23.012	23.402	27.994	30.224	33.684	32.848	38.066	35.259	30.331	28.808	28.779	31.992	28.784	24.855	27.058	26.026	25.185	27.811	27.273	23.356	19.846	26.35	22.169	22.828	33.449	47.359	53.416
570.5	22.793	24.715	25.38	22.103	19.775	22.849	23.219	27.912	30.061	33.498	32.651	37.907	35.036	30.082	28.647	28.557	31.793	28.643	24.751	26.791	25.9	25.064	27.701	27.036	23.126	19.762	26.141	22.034	22.675	33.189	47.367	53.471
571	22.707	24.639	25.279	21.934	19.719	22.688	23.035	27.848	29.88	33.38	32.525	37.712	34.917	29.955	28.478	28.395	31.719	28.464	24.598	26.615	25.787	24.931	27.638	26.838	22.966	19.697	25.965	21.93	22.606	32.814	47.331	53.605
571.5	22.653	24.55	25.252	21.851	19.63	22.556	22.933	27.791	29.816	33.265	32.445	37.539	34.779	29.887	28.347	28.249	31.637	28.244	24.462	26.476	25.603	24.848	27.63	26.688	22.894	19.684	25.864	21.903	22.608	32.458	47.211	53.616
572	22.637	24.497	25.217	21.851	19.658	22.456	22.899	27.711	29.703	33.152	32.363	37.376	34.65	29.813	28.238	28.151	31.476	28.07	24.328	26.425	25.518	24.73	27.626	26.523	22.884	19.599	25.734	21.926	22.628	32.452	46.934	53.408
572.5	22.543	24.392	25.165	21.852	19.681	22.366	22.888	27.668	29.61	32.959	32.212	37.247	34.404	29.724	28.205	27.985	31.29	27.897	24.252	26.379	25.494	24.693	27.583	26.364	22.859	19.518	25.589	21.954	22.607	32.795	46.781	53.433
573	22.471	24.363	25.093	21.81	19.754	22.343	22.867	27.581	29.464	32.746	31.991	37.064	34.127	29.52	28.131	27.775	31.121	27.812	24.253	26.359	25.571	24.673	27.453	26.193	22.762	19.429	25.457	21.902	22.536	33.043	46.504	53.505
573.5	22.362	24.3	25.048	21.701	19.738	22.306	22.779	27.522	29.42	32.612	31.855	36.888	34.038	29.374	28.055	27.585	31.052	27.734	24.284	26.232	25.648	24.663	27.312	26.056	22.643	19.311	25.295	21.803	22.441	32.926	46.439	53.552
574	22.264	24.19	25.031	21.588	19.685	22.183	22.644	27.469	29.369	32.55	31.697	36.622	34.006	29.265	27.929	27.471	30.986	27.775	24.341	26.045	25.609	24.575	27.179	25.988	22.534	19.18	25.186	21.702	22.309	32.733	46.464	53.505
574.5	22.186	24.073	25.081	21.627	19.603	22.052	22.507	27.371	29.315	32.563	31.534	36.387	33.937	29.22	27.852	27.476	30.97	27.786	24.299	25.873	25.483	24.447	27.048	25.872	22.369	19.044	25.02	21.676	22.24	32.544	46.614	53.12
575	22.134	24.016	25.026	21.688	19.612	21.953	22.446	27.188	29.123	32.481	31.299	36.123	33.89	29.127	27.818	27.469	30.971	27.675	24.158	25.709	25.324	24.303	27.008	25.745	22.24	19.015	24.963	21.697	22.179	32.338	46.688	53.097
575.5	22.124	23.93	24.855	21.77	19.664	21.886	22.41	27	28.946	32.354	31.143	35.878	33.834	28.966	27.74	27.426	30.908	27.447	24.064	25.658	25.217	24.191	27.012	25.555	22.101	19.037	24.964	21.706	22.183	32.041	46.601	53.023
576	22.174	23.874	24.727	21.813	19.738	21.822	22.335	26.831	28.771	32.187	31.059	35.741	33.816	28.774	27.583	27.271	30.768	27.175	24.028	25.583	25.178	24.129	27.042	25.464	22.003	19.081	24.933	21.661	22.155	31.861	46.615	53.219
576.5	22.188	23.821	24.719	21.781	19.701	21.724	22.266	26.75	28.66	32.048	30.997	35.632	33.705	28.675	27.335	27.131	30.623	27.065	24.038	25.474	25.068	24.085	27.046	25.411	21.878	19.073	24.872	21.647	22.147	32.005	46.436	53.298
577	22.164	23.774	24.756	21.658	19.533	21.621	22.218	26.686	28.529	31.947	30.89	35.45	33.526	28.561	27.205	27.071	30.477	27.039	24.023	25.355	24.972	24.026	26.963	25.349	21.755	18.969	24.722	21.624	22.09	32.174	46.077	53.039
577.5	22.076	23.689	24.762	21.432	19.407	21.524	22.134	26.657	28.401	31.806	30.694	35.213	33.345	28.37	27.135	26.944	30.283	27.019	23.961	25.312	24.866	23.919	26.825	25.233	21.663	18.88	24.568	21.628	22.01	32.211	45.673	52.988
578	21.975	23.555	24.69	21.263	19.329	21.434	22.011	26.631	28.269	31.667	30.548	35.012	33.197	28.19	27.158	26.814	30.143	26.951	23.959	25.366	24.807	23.804	26.653	25.116	21.618	18.837	24.478	21.617	21.954	32.302	45.525	52.755
578.5	21.995	23.48	24.616	21.29	19.434	21.419	21.859	26.543	28.195	31.513	30.4	34.991	33.027	28.05	27.103	26.653	30.022	26.776	23.955	25.389	24.777	23.817	26.571	25.018	21.605	18.818	24.41	21.559	21.89	32.187	45.684	52.792
579	22.008	23.492	24.565	21.367	19.499	21.433	21.716	26.417	28.159	31.337	30.26	34.998	32.881	28.04	27.015	26.591	29.939	26.659	23.984	25.288	24.729	23.884	26.556	24.883	21.536	18.812	24.329	21.535	21.857	32.218	45.925	52.541
579.5	21.895	23.433	24.468	21.401	19.497	21.342	21.605	26.274	28.149	31.245	30.12	34.923	32.792	27.945	26.855	26.572	29.831	26.58	24.046	25.11	24.716	23.917	26.537	24.66	21.435	18.728	24.251	21.483	21.823	32.01	46.124	52.146
580	21.723	23.387	24.291	21.371	19.385	21.197	21.513	26.143	28.125	31.213	29.975	34.766	32.734	27.839	26.77	26.546	29.65	26.503	24.081	24.975	24.672	23.845	26.448	24.467	21.31	18.664	24.167	21.416	21.783	31.978	46.243	52.011
580.5	21.528	23.239	24.071	21.278	19.223	21.01	21.429	26.109	28.047	31.259	29.937	34.619	32.728	27.791	26.704	26.463	29.434	26.437	23.994	24.871	24.599	23.714	26.393	24.364	21.163	18.648	24.073	21.363	21.762	31.991	46.097	52.089
581	21.5	23.185	23.833	21.252	19.1	20.859	21.407	26.106	27.937	31.185	29.868	34.492	32.635	27.807	26.649	26.321	29.193	26.33	23.815	24.817	24.497	23.61	26.293	24.276	21.026	18.627	24.02	21.323	21.698	31.805	45.823	52.242
581.5	21.538	23.069	23.714	21.251	19.028	20.732	21.409	26.127	27.857	31.045	29.808	34.384	32.555	27.816	26.479	26.186	29.021	26.345	23.606	24.745	24.362	23.587	26.29	24.196	20.907	18.608	23.972	21.341	21.642	31.55	45.582	52.071
582	21.542	22.959	23.735	21.34	19.064	20.63	21.359	26.062	27.777	30.91	29.7	34.217	32.465	27.671	26.255	26.087	28.947	26.29	23.474	24.609	24.241	23.593	26.284	24.1	20.857	18.532	23.891	21.337	21.615	31.39	45.378	51.79
582.5	21.493	22.828	23.81	21.314	19.082	20.574	21.272	25.986	27.688	30.858	29.561	34.09	32.329	27.445	26.046	25.999	28.945	26.177	23.41	24.502	24.178	23.593	26.283	24.044	20.893	18.456	23.789	21.35	21.592	31.389	45.067	51.646
583	21.337	22.776	23.832	21.177	19.048	20.632	21.163	25.904	27.567	30.8	29.417	33.938	32.279	27.303	25.916	25.858	28.939	25.969	23.414	24.354	24.157	23.575	26.297	24.089	20.894	18.443	23.672	21.342	21.574	31.431	44.756	51.533
583.5	21.224	22.742	23.773	21.002	18.925	20.664	21.096	25.89	27.487	30.757	29.336	33.843	32.213	27.189	25.869	25.709	28.847	25.831	23.44	24.26	24.13	23.499	26.232	24.127	20.858	18.444	23.597	21.347	21.552	31.317	44.758	51.658
584	21.183	22.744	23.676	20.941	18.84	20.656	21.13	25.864	27.422	30.638	29.302	33.644	32.157	27.013	25.89	25.592	28.731	25.836	23.492	24.177	24.108	23.385	26.181	24.135	20.792	18.444	23.603	21.333	21.53	31.269	45.08	51.514
584.5	21.21	22.7	23.611	20.968	18.856	20.628	21.176	25.814	27.419	30.532	29.27	33.414	32.043	26.824	25.879	25.59	28.58	25.868	23.492	24.086	24.045	23.259	26.114	24.104	20.673	18.394	23.495	21.312	21.519	31.213	45.395	51.57
585	21.223	22.648	23.625	20.993	18.907	20.573	21.199	25.769	27.471	30.454	29.114	33.241	31.87	26.665	25.829	25.56	28.418	25.794	23.425	24.068	24.017	23.166	26.017	24.011	20.591	18.284	23.436	21.241	21.483	31.239	45.456	51.62
585.5	21.147	22.617	23.615	20.939	18.943	20.52	21.169	25.703	27.515	30.377	28.971	33.156	31.809	26.684	25.697	25.553	28.294	25.63	23.364	24.069	23.99	23.113	25.947	23.859	20.53	18.231	23.332	21.159	21.407	31.249	45.433	51.554
586	21.055	22.584	23.61	20.842	18.889	20.465	21.081	25.652	27.487	30.293	28.85	33.1	31.803	26.737	25.599	25.518	28.178	25.489	23.283	24.102	23.949	23.066	25.888	23.704	20.423	18.22	23.285	21.082	21.353	31.169	45.257	51.261
586.5	20.968	22.53	23.543	20.811	18.85	20.428	20.925	25.598	27.343	30.2	28.837	32.987	31.758	26.728	25.46	25.451	28.133	25.465	23.231	24.072	23.98	22.997	25.875	23.59	20.351	18.263	23.246	21.054	21.305	31.06	45.101	50.75
587	21.048	22.443	23.533	20.915	18.885	20.431	20.814	25.5	27.118	30.08	28.801	32.882	31.672	26.721	25.397	25.456	28.194	25.54	23.206	23.947	23.982	23.016	25.835	23.539	20.27	18.277	23.187	21.077	21.305	30.877	44.932	50.305
587.5	21.172	22.374	23.573	20.998	18.91	20.452	20.836	25.5	26.959	30.077	28.694	32.816	31.544	26.653	25.317	25.442	28.182	25.518	23.168	23.892	24.005	23.1	25.804	23.511	20.277	18.239	23.097	21.083	21.293	30.874	44.919	50.401
588	21.201	22.4	23.608	21.022	18.94	20.472	20.895	25.502	26.802	30.065	28.598	32.768	31.507	26.617	25.344	25.389	28.136	25.461	23.143	23.828	23.929	23.153	25.767	23.461	20.297	18.204	23.029	21.049	21.271	30.92	45.061	50.534
588.5	21.091	22.33	23.505	20.877	18.853	20.448	20.907	25.53	26.689	30.004	28.505	32.668	31.53	26.597	25.448	25.221	28.045	25.342	23.126	23.819	23.857	23.125	25.8	23.392	20.304	18.21	22.974	21.028	21.296	30.938	45.178	50.539
589	20.933	22.201	23.377	20.766	18.758	20.327	20.782	25.527	26.667	29.884	28.436	32.526	31.499	26.524	25.486	25.007	27.93	25.258	23.123	23.746	23.803	23.094	25.817	23.354	20.27	18.218	22.893	21.072	21.286	30.974	45.033	50.278
589.5	20.918	22.09	23.315	20.7	18.651	20.193	20.684	25.53	26.638	29.704	28.36	32.354	31.369	26.439	25.52	24.949	27.923	25.234	23.206	23.621	23.799	23.048	25.772	23.326	20.24	18.254	22.822	21.159	21.259	31.285	44.8	50.008
590	20.929	22.074	23.281	20.697	18.574	20.083	20.682	25.524	26.697	29.638	28.273	32.292	31.268	26.369	25.414	25.047	27.932	25.253	23.2	23.542	23.774	22.951	25.659	23.37	20.18	18.257	22.745	21.139	21.218	31.551	44.623	49.961
590.5	20.956	22.222	23.27	20.764	18.557	20.039	20.723	25.529	26.699	29.615	28.229	32.315	31.252	26.359	25.282	25.149	27.879	25.359	23.233	23.53	23.778	22.768	25.479	23.351	20.116	18.185	22.717	21.057	21.19	31.655	44.576	50.005
591	20.883	22.259	23.265	20.871	18.579	20.057	20.714	25.49	26.685	29.599	28.175	32.343	31.211	26.336	25.194	25.166	27.793	25.407	23.242	23.527	23.786	22.715	25.41	23.348	20.118	18.189	22.793	20.965	21.183	31.491	44.694	49.785
591.5	20.828	22.32	23.309	21	18.65	20.067	20.715	25.524	26.663	29.649	28.134	32.3	31.12	26.208	25.153	25.062	27.609	25.392	23.279	23.494	23.838	22.76	25.371	23.307	20.105	18.173	22.819	20.972	21.153	31.329	44.686	49.633
592	20.79	22.262	23.38	21.088	18.697	20.024	20.738	25.526	26.616	29.678	28.126	32.111	30.955	26.112	25.158	24.919	27.492	25.276	23.266	23.434	23.785	22.895	25.37	23.273	20.011	18.201	22.863	21.016	21.109	31.169	44.733	49.712
592.5	20.748	22.175	23.274	21.035	18.717	19.941	20.748	25.521	26.601	29.718	28.109	31.991	30.9	26.025	25.068	24.802	27.457	25.167	23.169	23.436	23.701	22.907	25.357	23.23	19.922	18.209	22.827	20.999	21.133	30.975	44.781	49.965
593	20.741	22.159	23.189	20.908	18.644	19.882	20.673	25.463	26.567	29.629	28.018	31.885	30.902	26.03	24.952	24.766	27.513	25.082	23.113	23.395	23.638	22.855	25.39	23.244	19.877	18.198	22.794	20.919	21.112	30.626	44.881	50.347
593.5	20.769	22.167	23.175	20.764	18.601	19.864	20.524	25.417	26.49	29.501	27.958	31.785	30.893	25.987	24.808	24.837	27.559	25.003	23.101	23.371	23.645	22.863	25.472	23.307	19.924	18.188	22.738	20.811	21.045	30.393	44.951	50.61
594	20.819	22.262	23.275	20.716	18.576	19.842	20.389	25.381	26.434	29.475	27.938	31.691	30.91	26.017	24.727	24.917	27.583	24.988	23.166	23.295	23.712	22.87	25.518	23.288	19.927	18.177	22.647	20.813	20.99	30.436	45.021	50.716
594.5	20.823	22.236	23.373	20.688	18.601	19.819	20.371	25.306	26.366	29.43	27.973	31.645	30.92	26.074	24.741	24.963	27.582	25.043	23.267	23.323	23.748	22.893	25.495	23.175	19.866	18.142	22.582	20.867	21.014	30.351	44.823	50.413
595	20.745	22.19	23.332	20.704	18.573	19.822	20.415	25.27	26.364	29.412	27.933	31.638	30.918	26.067	24.835	24.911	27.608	25.069	23.31	23.28	23.668	22.859	25.443	23.072	19.833	18.104	22.567	20.921	21.068	30.454	44.628	50.218
595.5	20.631	22.131	23.216	20.689	18.526	19.849	20.46	25.194	26.367	29.393	27.927	31.644	30.898	25.985	24.943	24.828	27.617	25.013	23.279	23.225	23.544	22.86	25.435	23.065	19.849	18.058	22.65	20.941	21.078	30.458	44.359	50.248
596	20.529	22.065	23.032	20.65	18.413	19.837	20.413	25.191	26.411	29.396	27.886	31.529	30.855	25.847	24.979	24.703	27.58	24.862	23.155	23.148	23.389	22.919	25.425	23.085	19.913	18.056	22.721	20.903	21.039	30.577	44.354	50.422
596.5	20.51	21.951	22.865	20.604	18.39	19.789	20.305	25.154	26.415	29.389	27.884	31.468	30.784	25.789	24.987	24.598	27.541	24.708	23.077	23.066	23.337	22.918	25.383	23.065	19.965	18.061	22.709	20.883	20.993	30.661	44.4	50.322
597	20.541	21.831	22.837	20.537	18.427	19.721	20.209	25.194	26.324	29.285	27.777	31.353	30.666	25.806	25.056	24.548	27.498	24.668	23.068	23.009	23.289	22.867	25.309	22.965	19.968	18.05	22.601	20.866	20.982	30.259	44.535	50.035
597.5	20.599	21.782	22.87	20.548	18.527	19.675	20.164	25.208	26.283	29.144	27.655	31.344	30.586	25.888	25.06	24.53	27.455	24.644	23.128	22.939	23.219	22.725	25.219	22.866	19.999	18.004	22.463	20.885	20.995	29.972	44.566	49.752
598	20.701	21.843	23.011	20.596	18.669	19.658	20.16	25.179	26.287	29.135	27.583	31.37	30.555	25.999	25.063	24.609	27.399	24.64	23.143	22.966	23.125	22.667	25.196	22.82	19.965	17.992	22.416	20.913	20.98	29.771	44.587	49.653
598.5	20.764	21.858	23.09	20.6	18.697	19.65	20.164	25.111	26.32	29.157	27.479	31.396	30.59	25.977	24.921	24.586	27.254	24.598	23.116	23.048	23.081	22.681	25.157	22.782	19.852	18.032	22.469	20.931	20.969	29.867	44.508	49.545
599	20.831	21.837	23.2	20.659	18.693	19.655	20.162	25.127	26.285	29.167	27.432	31.354	30.608	25.91	24.798	24.555	27.154	24.613	23.119	23.125	23.102	22.708	25.127	22.801	19.696	18.035	22.484	20.889	20.938	29.976	44.616	49.466
599.5	20.892	21.877	23.223	20.695	18.706	19.707	20.165	25.253	26.198	29.129	27.43	31.239	30.602	25.803	24.665	24.45	27.026	24.731	23.111	23.208	23.182	22.722	25.11	22.773	19.538	18.055	22.44	20.861	20.959	29.867	44.744	49.423
600	20.953	21.943	23.237	20.745	18.71	19.785	20.153	25.384	26.142	29.048	27.429	31.128	30.535	25.833	24.639	24.381	26.994	24.809	23.115	23.183	23.247	22.619	25.178	22.789	19.494	18.043	22.375	20.792	20.966	29.79	44.933	49.384
600.5	20.956	21.933	23.177	20.695	18.732	19.835	20.14	25.381	26.129	28.937	27.38	31.105	30.398	25.796	24.728	24.361	26.982	24.74	23.085	23.07	23.233	22.547	25.326	22.817	19.532	18.027	22.306	20.772	20.927	29.591	44.816	49.55
601	20.835	21.826	23.137	20.623	18.677	19.847	20.126	25.272	26.162	28.876	27.25	31.129	30.252	25.677	24.761	24.328	26.998	24.612	23.049	22.867	23.184	22.506	25.363	22.804	19.534	18.012	22.289	20.782	20.901	29.671	44.502	49.816
601.5	20.62	21.7	23.036	20.579	18.604	19.811	20.155	25.197	26.237	28.799	27.191	31.127	30.225	25.503	24.712	24.328	27	24.502	23.076	22.733	23.171	22.501	25.249	22.811	19.516	17.93	22.292	20.795	20.901	30.118	44.227	49.928
602	20.476	21.68	22.965	20.571	18.553	19.732	20.182	25.159	26.284	28.8	27.179	31.063	30.322	25.384	24.59	24.326	26.894	24.477	23.042	22.725	23.178	22.521	25.062	22.743	19.418	17.881	22.296	20.779	20.926	30.468	44.212	50.001
602.5	20.42	21.729	22.897	20.612	18.534	19.599	20.166	25.131	26.306	28.741	27.217	30.953	30.333	25.348	24.495	24.277	26.729	24.5	22.985	22.79	23.174	22.505	24.998	22.692	19.376	17.859	22.295	20.772	21.002	30.832	44.337	49.811
603	20.435	21.674	22.877	20.631	18.567	19.497	20.121	25.103	26.204	28.716	27.184	30.943	30.222	25.377	24.52	24.176	26.614	24.476	22.938	22.781	23.023	22.529	25.011	22.619	19.365	17.902	22.203	20.768	20.998	30.785	44.367	49.612
603.5	20.465	21.618	22.846	20.619	18.583	19.457	20.048	25.079	26.053	28.688	27.032	30.877	30.025	25.479	24.637	24.113	26.647	24.464	22.903	22.686	22.887	22.509	25.019	22.548	19.389	17.979	22.107	20.775	20.976	30.554	44.141	49.324
604	20.486	21.465	22.84	20.48	18.516	19.503	20.013	25.052	25.908	28.662	26.859	30.795	29.901	25.531	24.73	24.091	26.661	24.437	22.907	22.573	22.801	22.441	25.007	22.518	19.419	17.976	21.994	20.758	20.866	30.138	43.962	49.241
604.5	20.432	21.437	22.859	20.345	18.325	19.522	19.996	25.009	25.809	28.615	26.68	30.612	29.839	25.469	24.662	24.092	26.587	24.362	22.851	22.479	22.786	22.315	25.005	22.485	19.415	17.936	21.972	20.674	20.773	29.837	43.774	49.229
605	20.369	21.458	22.871	20.291	18.21	19.493	19.998	24.957	25.792	28.557	26.679	30.449	29.833	25.285	24.486	23.997	26.447	24.298	22.798	22.5	22.819	22.208	24.985	22.398	19.343	17.892	22.018	20.635	20.765	29.863	43.861	49.324
605.5	20.269	21.473	22.842	20.348	18.211	19.443	20.015	24.886	25.75	28.518	26.721	30.333	29.879	25.134	24.289	23.969	26.35	24.167	22.77	22.547	22.848	22.2	24.942	22.304	19.226	17.902	22.141	20.641	20.823	29.999	43.746	49.438
606	20.27	21.473	22.75	20.438	18.318	19.369	19.993	24.835	25.748	28.41	26.755	30.233	29.869	25.011	24.169	23.985	26.366	24.17	22.77	22.621	22.888	22.243	24.891	22.215	19.134	17.945	22.18	20.672	20.864	30.008	43.647	49.54
606.5	20.321	21.425	22.652	20.374	18.351	19.363	19.938	24.74	25.754	28.271	26.604	30.242	29.799	24.971	24.141	24.069	26.409	24.148	22.774	22.631	22.87	22.314	24.856	22.174	19.088	17.894	22.042	20.693	20.841	29.724	43.69	49.438
607	20.359	21.414	22.585	20.294	18.324	19.366	19.848	24.692	25.701	28.163	26.427	30.265	29.618	24.923	24.171	24.059	26.411	24.104	22.767	22.573	22.812	22.313	24.807	22.165	19.097	17.775	21.861	20.642	20.731	29.481	43.941	49.183
607.5	20.364	21.409	22.548	20.219	18.297	19.381	19.777	24.654	25.606	28.097	26.28	30.249	29.529	24.955	24.238	24.014	26.369	24.002	22.788	22.506	22.721	22.259	24.73	22.119	19.111	17.664	21.725	20.599	20.668	29.292	44.131	49.009
608	20.277	21.358	22.507	20.192	18.287	19.317	19.745	24.648	25.467	28.037	26.216	30.139	29.432	25.015	24.206	23.897	26.246	23.876	22.803	22.421	22.614	22.205	24.67	22.047	19.077	17.649	21.682	20.578	20.649	29.234	43.973	48.992
608.5	20.186	21.316	22.447	20.269	18.341	19.23	19.776	24.616	25.385	27.967	26.208	29.951	29.38	24.99	24.101	23.682	26.112	23.81	22.827	22.354	22.51	22.148	24.67	21.999	18.99	17.69	21.704	20.534	20.708	29.335	43.646	49.003
609	20.152	21.31	22.469	20.32	18.392	19.179	19.808	24.643	25.358	27.844	26.127	29.765	29.313	24.788	24.031	23.519	26.012	23.823	22.805	22.335	22.507	22.161	24.665	21.962	18.881	17.728	21.707	20.488	20.71	29.61	43.658	48.981
609.5	20.117	21.317	22.467	20.346	18.467	19.14	19.778	24.639	25.296	27.807	26.152	29.638	29.305	24.558	23.991	23.452	25.945	23.826	22.735	22.26	22.51	22.146	24.643	21.942	18.855	17.746	21.723	20.445	20.681	29.979	43.682	49.051
610	20.129	21.301	22.513	20.268	18.517	19.03	19.633	24.66	25.21	27.76	26.14	29.565	29.306	24.5	23.964	23.499	25.905	23.819	22.652	22.179	22.544	22.106	24.558	21.905	18.849	17.784	21.674	20.46	20.574	29.998	43.807	49.238
610.5	20.027	21.229	22.465	20.102	18.505	18.955	19.517	24.614	25.102	27.752	26.144	29.503	29.31	24.604	23.913	23.542	25.892	23.718	22.619	22.108	22.511	21.971	24.482	21.837	18.843	17.794	21.557	20.426	20.441	29.857	43.975	49.27
611	19.877	21.115	22.379	19.992	18.485	18.91	19.481	24.502	25.002	27.686	26.108	29.427	29.304	24.618	23.848	23.48	25.751	23.604	22.579	22.046	22.456	21.876	24.417	21.783	18.788	17.813	21.472	20.372	20.324	29.477	44.287	49.126
611.5	19.709	21.053	22.16	20.02	18.365	18.937	19.528	24.313	24.91	27.605	26.063	29.331	29.227	24.505	23.788	23.434	25.651	23.555	22.546	22.019	22.419	21.848	24.437	21.716	18.768	17.752	21.406	20.262	20.223	29.282	44.611	48.563
612	19.679	21.009	21.931	20.175	18.259	18.911	19.499	24.129	24.77	27.521	25.982	29.24	29.099	24.313	23.723	23.384	25.493	23.484	22.456	21.914	22.348	21.856	24.452	21.639	18.739	17.725	21.381	20.216	20.204	29.199	44.574	47.973
612.5	19.734	20.992	21.83	20.264	18.151	18.815	19.41	24.013	24.66	27.456	25.802	29.146	28.91	24.232	23.649	23.357	25.416	23.399	22.342	21.853	22.248	21.861	24.42	21.523	18.678	17.698	21.33	20.235	20.24	29.037	44.264	47.659
613	19.807	20.972	21.863	20.261	18.068	18.8	19.337	24.001	24.573	27.384	25.602	29.074	28.765	24.203	23.675	23.364	25.407	23.324	22.278	21.766	22.162	21.837	24.34	21.372	18.57	17.689	21.325	20.31	20.262	29.121	43.812	47.833
613.5	19.708	20.87	21.886	20.103	17.978	18.832	19.333	24.005	24.522	27.227	25.442	29.029	28.667	24.126	23.629	23.333	25.417	23.335	22.227	21.749	22.164	21.781	24.228	21.292	18.49	17.701	21.36	20.345	20.198	29.213	43.41	48.133
614	19.66	20.767	21.843	20.016	17.962	18.799	19.302	23.948	24.429	27.101	25.344	28.97	28.55	23.938	23.498	23.316	25.293	23.348	22.216	21.731	22.21	21.703	24.234	21.29	18.461	17.686	21.375	20.35	20.096	29.312	43.281	48.339
614.5	19.634	20.698	21.829	19.993	17.958	18.729	19.276	23.806	24.304	27.034	25.303	28.911	28.497	23.721	23.342	23.237	25.147	23.263	22.209	21.734	22.209	21.657	24.229	21.277	18.381	17.634	21.318	20.254	20.013	29.453	43.369	48.252
615	19.683	20.685	21.868	19.993	17.975	18.628	19.204	23.653	24.235	27.034	25.271	28.775	28.482	23.634	23.289	23.17	24.98	23.074	22.11	21.654	22.1	21.754	24.2	21.218	18.269	17.612	21.185	20.23	20.017	29.569	43.474	48.038
615.5	19.649	20.67	21.872	19.952	17.942	18.58	19.137	23.502	24.227	26.961	25.17	28.59	28.44	23.689	23.335	23.114	24.985	22.953	22.021	21.547	22.012	21.837	24.129	21.109	18.166	17.6	21.056	20.171	19.992	29.579	43.448	47.795
616	19.5	20.55	21.802	19.856	17.905	18.55	19.072	23.416	24.257	26.817	25.011	28.284	28.333	23.766	23.378	22.987	24.964	22.951	21.986	21.483	21.969	21.864	24.06	21.076	18.129	17.619	20.88	20.162	20.011	29.333	43.153	47.692
616.5	19.341	20.451	21.65	19.847	17.916	18.532	19.047	23.295	24.158	26.695	24.777	28.073	28.214	23.819	23.244	22.809	24.851	23.006	21.988	21.438	21.852	21.785	24.027	21.032	18.134	17.595	20.793	20.112	19.985	28.9	43.146	47.79
617	19.194	20.457	21.608	19.936	17.962	18.515	19.058	23.185	23.984	26.586	24.644	27.88	28.126	23.829	23.146	22.667	24.799	22.982	22.048	21.384	21.727	21.699	24.064	21.032	18.06	17.581	20.75	20.061	20	28.745	43.125	47.796
617.5	19.266	20.54	21.585	20.069	18.036	18.49	19.093	23.14	23.845	26.554	24.644	27.843	28.067	23.855	23.038	22.666	24.714	22.895	21.994	21.259	21.564	21.644	24.063	21.015	17.967	17.619	20.804	20.059	19.959	28.739	43.177	47.69
618	19.401	20.501	21.578	20.042	18.048	18.399	19.105	23.162	23.795	26.547	24.695	27.826	27.985	23.886	23.014	22.773	24.681	22.815	21.927	21.166	21.489	21.58	24.012	20.953	17.842	17.691	20.894	20.098	19.952	28.93	42.927	47.296
618.5	19.523	20.393	21.553	19.874	17.964	18.335	19.106	23.115	23.774	26.513	24.714	27.796	27.912	23.86	23.029	22.765	24.543	22.8	21.856	21.109	21.476	21.54	23.954	20.896	17.833	17.69	20.931	20.165	19.97	29.105	42.937	47.09
619	19.461	20.267	21.546	19.75	17.825	18.266	19.045	23.05	23.708	26.406	24.589	27.713	27.892	23.737	23.03	22.702	24.545	22.793	21.856	21.152	21.476	21.458	23.905	20.823	17.82	17.679	20.877	20.167	20.016	29.192	42.945	46.981
619.5	19.312	20.283	21.61	19.777	17.718	18.204	19.002	22.988	23.601	26.232	24.415	27.597	27.842	23.547	22.963	22.606	24.578	22.75	21.85	21.188	21.516	21.427	23.903	20.729	17.801	17.644	20.751	20.109	20.008	28.995	43.209	47.177
620	19.184	20.368	21.649	19.877	17.695	18.155	18.976	23.06	23.56	26.182	24.282	27.55	27.831	23.344	22.838	22.598	24.636	22.698	21.826	21.171	21.511	21.426	23.851	20.625	17.707	17.65	20.686	19.971	19.927	28.723	43.288	47.263
620.5	19.122	20.395	21.625	19.902	17.689	18.155	18.978	23.061	23.52	26.161	24.156	27.503	27.742	23.25	22.74	22.559	24.559	22.683	21.821	21.122	21.551	21.442	23.85	20.545	17.682	17.644	20.649	19.916	19.86	28.624	43.307	47.238
621	19.035	20.338	21.531	19.804	17.67	18.181	18.95	22.973	23.418	26.084	24.085	27.441	27.586	23.24	22.788	22.499	24.485	22.689	21.837	21.045	21.543	21.421	23.877	20.591	17.694	17.644	20.65	19.915	19.82	28.881	43.119	47.198
621.5	18.973	20.222	21.439	19.756	17.746	18.215	18.924	22.783	23.255	25.923	24.032	27.342	27.461	23.3	22.86	22.439	24.507	22.631	21.786	20.961	21.481	21.402	23.9	20.633	17.689	17.712	20.65	19.971	19.794	29.099	42.989	47.262
622	18.915	20.163	21.401	19.787	17.771	18.22	18.891	22.667	23.143	25.782	24.047	27.241	27.324	23.249	22.859	22.347	24.485	22.568	21.705	20.886	21.398	21.356	23.868	20.674	17.703	17.729	20.596	20.001	19.78	29.247	43.008	47.268
622.5	18.945	20.254	21.382	19.858	17.818	18.232	18.896	22.661	23.183	25.758	24.136	27.191	27.249	23.187	22.781	22.296	24.474	22.455	21.694	20.854	21.368	21.293	23.814	20.651	17.688	17.691	20.529	20.025	19.784	29.145	42.981	47.194
623	18.965	20.375	21.366	19.837	17.753	18.213	18.825	22.725	23.269	25.846	24.226	27.243	27.193	23.162	22.791	22.299	24.397	22.403	21.798	20.94	21.397	21.293	23.749	20.603	17.683	17.624	20.437	20.019	19.792	28.933	42.699	46.939
623.5	18.975	20.453	21.322	19.731	17.706	18.186	18.73	22.776	23.33	25.94	24.234	27.286	27.147	23.136	22.774	22.281	24.296	22.366	21.883	21.02	21.452	21.356	23.691	20.55	17.677	17.563	20.389	20.033	19.772	28.778	42.481	46.808
624	18.968	20.365	21.371	19.653	17.604	18.163	18.663	22.76	23.327	25.969	24.221	27.288	27.242	23.152	22.729	22.289	24.238	22.379	21.861	20.979	21.439	21.469	23.636	20.476	17.701	17.601	20.387	19.971	19.705	28.753	42.571	46.695
624.5	18.985	20.281	21.485	19.691	17.592	18.217	18.689	22.769	23.287	25.845	24.168	27.257	27.297	23.186	22.65	22.254	24.137	22.392	21.765	20.905	21.366	21.474	23.617	20.497	17.742	17.601	20.352	19.926	19.67	28.781	42.897	46.743
625	19.005	20.176	21.547	19.823	17.648	18.27	18.759	22.689	23.214	25.714	24.192	27.279	27.395	23.299	22.643	22.268	24.189	22.447	21.736	20.854	21.259	21.503	23.589	20.485	17.709	17.615	20.314	19.895	19.633	28.734	43.1	46.849
625.5	18.967	20.133	21.436	19.89	17.761	18.251	18.845	22.64	23.15	25.69	24.119	27.367	27.399	23.341	22.717	22.283	24.223	22.495	21.716	20.947	21.244	21.478	23.57	20.527	17.688	17.564	20.28	19.876	19.665	28.769	43.118	46.846
626	18.927	20.071	21.296	19.845	17.771	18.194	18.889	22.559	23.076	25.705	24.045	27.394	27.304	23.275	22.738	22.28	24.24	22.459	21.726	21.015	21.251	21.421	23.567	20.476	17.661	17.478	20.26	19.866	19.667	28.725	42.981	46.843
626.5	18.896	19.976	21.178	19.739	17.753	18.104	18.865	22.528	23.081	25.719	24.014	27.386	27.201	23.167	22.72	22.276	24.175	22.309	21.68	21.004	21.209	21.324	23.552	20.416	17.653	17.398	20.263	19.864	19.729	28.628	42.937	46.737
627	18.961	19.942	21.14	19.739	17.763	18.016	18.754	22.578	23.057	25.617	24.055	27.322	27.089	23.133	22.712	22.233	24.027	22.218	21.621	20.881	21.127	21.27	23.549	20.339	17.625	17.383	20.27	19.89	19.74	28.258	42.823	46.904
627.5	19.033	19.882	21.184	19.881	17.807	17.941	18.622	22.638	23.059	25.584	24.109	27.31	27.061	23.163	22.751	22.204	23.948	22.291	21.666	20.835	21.139	21.252	23.502	20.296	17.573	17.372	20.275	19.947	19.752	28.055	42.912	46.913
628	19.072	19.936	21.267	19.941	17.775	17.935	18.561	22.701	23.012	25.596	24.085	27.239	27.099	23.189	22.776	22.216	23.978	22.37	21.69	20.795	21.181	21.22	23.475	20.291	17.555	17.401	20.264	19.95	19.699	28.079	42.943	46.689
628.5	19.007	19.964	21.338	19.872	17.74	18.006	18.575	22.656	22.966	25.628	24.003	27.172	27.133	23.128	22.702	22.207	24.02	22.36	21.68	20.785	21.173	21.176	23.527	20.299	17.543	17.352	20.253	19.882	19.649	28.344	43.05	46.415
629	18.937	19.961	21.321	19.716	17.727	18.094	18.609	22.602	22.993	25.623	23.855	27.08	27.128	22.996	22.541	22.13	23.987	22.291	21.562	20.75	21.144	21.101	23.63	20.277	17.561	17.335	20.261	19.805	19.588	28.345	43.097	46.167
629.5	18.834	19.908	21.234	19.629	17.822	18.079	18.655	22.576	23.026	25.61	23.791	27.096	27.071	22.844	22.423	22.076	23.91	22.303	21.534	20.763	21.165	21.076	23.683	20.275	17.577	17.288	20.326	19.77	19.531	28.351	42.944	46.2
630	18.817	19.843	21.207	19.648	17.956	18.065	18.666	22.559	23.101	25.586	23.789	27.123	27.016	22.791	22.389	22.028	23.845	22.307	21.589	20.813	21.251	21.119	23.648	20.323	17.579	17.301	20.367	19.788	19.517	28.549	42.834	46.543
630.5	18.867	19.801	21.179	19.686	17.994	18.058	18.687	22.523	23.129	25.578	23.824	27.11	27.034	22.76	22.422	22.026	23.873	22.249	21.618	20.776	21.28	21.238	23.527	20.365	17.575	17.323	20.303	19.855	19.513	28.801	42.629	46.823
631	18.971	19.876	21.199	19.768	17.893	18.132	18.68	22.564	23.142	25.569	23.815	27.049	27.061	22.832	22.441	22.025	23.905	22.23	21.615	20.749	21.297	21.25	23.443	20.388	17.578	17.417	20.277	19.875	19.547	28.82	42.769	46.931
631.5	18.977	19.936	21.145	19.766	17.755	18.208	18.639	22.598	23.106	25.508	23.763	26.933	27.06	22.817	22.414	22.048	23.925	22.264	21.58	20.753	21.301	21.171	23.347	20.358	17.578	17.504	20.236	19.918	19.593	28.652	42.88	46.462
632	19.006	20.027	21.137	19.726	17.747	18.214	18.652	22.574	23.024	25.408	23.733	26.785	27.036	22.776	22.415	22.104	23.908	22.357	21.57	20.724	21.267	21.127	23.34	20.36	17.557	17.541	20.239	19.897	19.598	28.563	42.897	46.098
632.5	18.932	19.964	21.102	19.63	17.739	18.151	18.654	22.494	22.912	25.306	23.777	26.644	26.951	22.754	22.423	22.083	23.849	22.36	21.533	20.677	21.184	21.183	23.335	20.329	17.508	17.475	20.159	19.884	19.601	28.882	42.854	45.984
633	18.95	19.844	21.085	19.494	17.67	18.035	18.693	22.445	22.828	25.261	23.893	26.621	26.927	22.802	22.499	22.112	23.893	22.327	21.529	20.638	21.116	21.323	23.286	20.29	17.392	17.414	20.102	19.851	19.569	28.985	42.643	46.098
633.5	18.849	19.744	21.055	19.478	17.482	17.978	18.729	22.457	22.745	25.331	23.974	26.568	26.975	22.879	22.478	22.096	23.888	22.291	21.583	20.638	21.042	21.331	23.263	20.222	17.312	17.42	20.101	19.789	19.568	28.938	42.602	46.267
634	18.849	19.809	21.131	19.592	17.489	17.977	18.78	22.477	22.738	25.361	23.878	26.523	26.969	22.942	22.419	22.185	23.883	22.243	21.683	20.645	21.018	21.319	23.244	20.166	17.295	17.438	20.071	19.719	19.54	28.644	42.312	46.09
634.5	18.838	19.905	21.208	19.695	17.546	18.028	18.82	22.473	22.673	25.301	23.665	26.407	26.841	22.896	22.274	22.185	23.769	22.158	21.728	20.606	20.993	21.263	23.287	20.145	17.36	17.471	20.075	19.679	19.44	28.29	42.104	45.795
635	18.764	19.877	21.156	19.694	17.585	18.044	18.763	22.454	22.623	25.205	23.557	26.413	26.698	22.853	22.142	22.133	23.706	22.1	21.736	20.567	20.944	21.222	23.248	20.128	17.426	17.485	20.078	19.719	19.37	28.323	41.997	45.596
635.5	18.651	19.705	21.033	19.66	17.521	18	18.685	22.374	22.505	25.158	23.511	26.448	26.664	22.773	22.048	21.952	23.627	22.062	21.668	20.507	20.927	21.207	23.251	20.113	17.393	17.504	20.115	19.779	19.341	28.377	42.193	45.716
636	18.559	19.612	20.983	19.71	17.496	17.958	18.646	22.292	22.462	25.193	23.473	26.399	26.586	22.757	22.075	21.758	23.55	22.064	21.604	20.434	20.956	21.226	23.26	20.008	17.345	17.434	20.089	19.822	19.356	28.414	42.476	45.875
636.5	18.605	19.63	20.997	19.749	17.578	17.947	18.626	22.201	22.415	25.112	23.318	26.296	26.478	22.715	22.149	21.661	23.482	22.055	21.552	20.417	20.971	21.214	23.218	19.911	17.235	17.34	20.016	19.802	19.363	28.202	42.812	45.791
637	18.738	19.698	21	19.685	17.653	17.963	18.566	22.174	22.388	24.977	23.172	26.194	26.348	22.62	22.154	21.624	23.411	22.005	21.5	20.428	20.889	21.156	23.078	19.893	17.157	17.281	19.883	19.763	19.395	28.229	42.857	45.574
637.5	18.807	19.661	21	19.628	17.658	17.937	18.451	22.144	22.347	24.855	23.081	26.143	26.304	22.487	22.037	21.574	23.365	21.95	21.45	20.416	20.705	21.016	22.977	19.851	17.115	17.35	19.759	19.733	19.4	28.494	42.694	45.556
638	18.764	19.577	20.97	19.615	17.612	17.889	18.349	22.074	22.324	24.744	23.02	26.048	26.211	22.388	21.914	21.525	23.301	21.827	21.391	20.383	20.538	20.943	22.918	19.827	17.118	17.38	19.665	19.737	19.378	28.562	42.266	45.741
638.5	18.597	19.517	20.904	19.649	17.534	17.825	18.331	21.938	22.295	24.517	22.984	25.885	26.115	22.306	21.925	21.522	23.229	21.7	21.297	20.277	20.414	20.932	22.866	19.773	17.133	17.417	19.65	19.69	19.302	28.421	41.975	45.873
639	18.428	19.469	20.767	19.6	17.477	17.738	18.349	21.836	22.201	24.264	22.899	25.649	26.008	22.271	21.936	21.534	23.095	21.603	21.204	20.229	20.387	20.948	22.742	19.738	17.102	17.376	19.679	19.576	19.178	28.346	41.9	45.786
639.5	18.381	19.505	20.691	19.534	17.548	17.648	18.356	21.748	22.043	24.1	22.823	25.377	25.886	22.171	21.911	21.468	22.89	21.582	21.122	20.21	20.383	20.968	22.617	19.696	17.023	17.37	19.705	19.466	19.103	28.27	41.984	45.768
640	18.354	19.545	20.691	19.437	17.639	17.586	18.332	21.695	21.892	24.001	22.692	25.126	25.669	22.119	21.825	21.391	22.749	21.583	21.087	20.234	20.37	20.913	22.548	19.622	16.885	17.35	19.694	19.452	19.075	28.233	41.927	45.732
640.5	18.299	19.561	20.741	19.391	17.696	17.613	18.29	21.573	21.751	23.867	22.557	24.911	25.478	21.988	21.752	21.339	22.723	21.502	21.067	20.183	20.285	20.817	22.489	19.551	16.754	17.317	19.575	19.447	19.06	28.197	41.82	45.806
641	18.191	19.537	20.771	19.367	17.661	17.65	18.288	21.43	21.569	23.686	22.36	24.782	25.364	21.859	21.729	21.24	22.743	21.311	20.951	20.024	20.211	20.731	22.407	19.441	16.654	17.271	19.387	19.446	19.055	28.057	41.651	45.469
641.5	18.106	19.384	20.691	19.348	17.577	17.658	18.256	21.25	21.356	23.503	22.2	24.677	25.278	21.813	21.719	21.127	22.736	21.201	20.795	19.896	20.131	20.731	22.285	19.392	16.66	17.194	19.271	19.448	19.06	28.055	41.477	45.115
642	18.028	19.263	20.581	19.255	17.531	17.588	18.176	21.166	21.21	23.41	22.03	24.558	25.132	21.833	21.71	21.074	22.697	21.154	20.627	19.807	20.061	20.731	22.248	19.384	16.706	17.099	19.243	19.448	19.057	27.819	41.205	44.743
642.5	17.989	19.22	20.524	19.183	17.48	17.467	18.051	21.143	21.149	23.312	21.885	24.438	24.95	21.83	21.64	21.118	22.579	21.118	20.542	19.746	19.992	20.765	22.303	19.443	16.721	17.041	19.268	19.42	19.057	27.75	41.209	44.733
643	17.987	19.249	20.537	19.147	17.502	17.403	17.992	21.077	21.101	23.295	21.781	24.321	24.795	21.75	21.609	21.238	22.544	21.054	20.493	19.656	19.907	20.732	22.359	19.462	16.665	17.029	19.215	19.345	18.983	27.724	41.398	44.753
643.5	18.048	19.259	20.55	19.162	17.478	17.38	17.984	20.95	20.976	23.192	21.702	24.25	24.734	21.62	21.584	21.242	22.389	20.994	20.464	19.54	19.861	20.789	22.304	19.475	16.58	17.056	19.105	19.327	18.958	27.848	41.577	44.767
644	18.055	19.211	20.496	19.228	17.456	17.37	17.968	20.786	20.811	23.099	21.704	24.192	24.637	21.554	21.578	21.247	22.34	20.999	20.434	19.51	19.789	20.817	22.194	19.434	16.51	17.108	19.035	19.308	18.923	28.154	41.49	44.701
644.5	18.044	19.2	20.441	19.293	17.47	17.362	17.952	20.706	20.7	22.942	21.641	24.051	24.456	21.462	21.511	21.127	22.242	20.907	20.326	19.503	19.728	20.848	22.131	19.313	16.515	17.185	19.034	19.296	18.899	28.307	41.44	44.781
645	17.966	19.202	20.379	19.361	17.512	17.298	17.96	20.536	20.615	22.789	21.532	23.903	24.253	21.381	21.396	21.014	22.166	20.77	20.252	19.549	19.695	20.777	22.122	19.129	16.47	17.244	18.957	19.213	18.829	28.153	41.553	44.757
645.5	17.839	19.105	20.271	19.407	17.496	17.263	18.031	20.342	20.522	22.674	21.304	23.722	24.061	21.307	21.22	20.887	22.027	20.655	20.233	19.491	19.662	20.735	22.152	19.005	16.452	17.304	18.855	19.192	18.759	27.908	41.633	44.635
646	17.672	18.968	20.1	19.332	17.436	17.236	18.053	20.159	20.309	22.547	21.101	23.556	23.97	21.315	21.124	20.812	21.871	20.618	20.281	19.402	19.597	20.692	22.076	18.93	16.404	17.244	18.698	19.172	18.723	27.558	41.695	44.587
646.5	17.581	18.867	19.949	19.224	17.351	17.239	18.009	20.13	20.115	22.46	20.956	23.409	23.878	21.287	21.123	20.829	21.807	20.596	20.215	19.291	19.443	20.644	21.957	18.898	16.393	17.176	18.673	19.197	18.703	27.476	41.647	44.338
647	17.562	18.847	19.901	19.07	17.326	17.23	17.915	20.145	20.051	22.331	20.918	23.259	23.818	21.265	21.218	20.943	21.884	20.529	20.121	19.304	19.363	20.584	21.773	18.808	16.356	17.108	18.714	19.118	18.716	27.424	41.49	43.977
647.5	17.563	18.754	19.933	18.979	17.349	17.186	17.838	20.106	20.034	22.186	20.873	23.119	23.762	21.158	21.3	20.95	21.865	20.441	20.057	19.336	19.324	20.565	21.672	18.702	16.242	17.169	18.723	19.038	18.686	27.42	41.199	43.539
648	17.489	18.703	19.946	18.992	17.413	17.153	17.807	19.976	19.981	21.987	20.795	23.014	23.686	21.129	21.338	20.931	21.801	20.401	20.132	19.375	19.346	20.557	21.601	18.555	16.112	17.254	18.726	18.979	18.701	27.45	41.038	43.641
648.5	17.397	18.659	19.908	19.075	17.395	17.141	17.762	19.858	19.819	21.811	20.731	22.92	23.55	21.166	21.302	20.794	21.643	20.455	20.147	19.339	19.271	20.545	21.531	18.516	16.088	17.303	18.699	18.986	18.672	27.362	41.045	43.802
649	17.316	18.66	19.843	19.142	17.331	17.102	17.701	19.78	19.678	21.717	20.724	22.894	23.403	21.18	21.194	20.731	21.556	20.457	20.071	19.254	19.227	20.537	21.481	18.487	16.134	17.248	18.693	19.001	18.653	27.431	41.137	43.966
649.5	17.332	18.69	19.837	19.137	17.264	17.04	17.63	19.725	19.583	21.664	20.675	22.821	23.323	21.18	21.116	20.661	21.606	20.443	19.958	19.201	19.217	20.547	21.479	18.468	16.164	17.199	18.686	19.004	18.571	27.344	41.291	43.909
650	17.392	18.785	19.895	19.161	17.337	16.981	17.642	19.618	19.508	21.634	20.609	22.777	23.318	21.119	21.147	20.633	21.648	20.38	19.833	19.162	19.176	20.549	21.466	18.445	16.125	17.172	18.629	19.015	18.531	27.564	41.248	43.866
650.5	17.37	18.814	19.912	19.193	17.441	16.963	17.739	19.525	19.468	21.611	20.502	22.719	23.306	21.046	21.127	20.609	21.661	20.378	19.812	19.14	19.092	20.487	21.447	18.382	16.055	17.151	18.566	18.998	18.514	27.73	40.954	43.575
651	17.313	18.713	19.84	19.293	17.526	17.022	17.825	19.452	19.374	21.567	20.429	22.659	23.217	20.974	21.045	20.579	21.534	20.312	19.773	19.073	18.917	20.448	21.443	18.403	16.028	17.117	18.496	19.002	18.526	27.779	40.675	43.199
651.5	17.239	18.541	19.783	19.29	17.48	17.108	17.82	19.391	19.297	21.494	20.307	22.561	23.103	20.873	21.024	20.595	21.468	20.291	19.707	19.021	18.889	20.405	21.433	18.451	15.944	17.158	18.484	18.978	18.503	27.583	40.707	43.081
652	17.278	18.519	19.76	19.275	17.409	17.167	17.728	19.347	19.167	21.36	20.171	22.47	23.016	20.839	21.135	20.599	21.481	20.282	19.648	18.941	18.932	20.422	21.422	18.464	15.901	17.237	18.514	18.942	18.472	27.351	40.998	43.129
652.5	17.31	18.585	19.74	19.177	17.352	17.135	17.61	19.303	19.084	21.242	20.107	22.43	22.99	20.853	21.263	20.656	21.51	20.316	19.647	18.91	19.003	20.458	21.378	18.345	15.851	17.298	18.532	18.893	18.458	27.136	41.061	43.332
653	17.365	18.666	19.695	19.102	17.365	17.016	17.538	19.274	19.01	21.176	20.113	22.404	22.936	20.889	21.29	20.714	21.564	20.252	19.698	18.864	18.963	20.452	21.297	18.193	15.855	17.247	18.491	18.857	18.484	27.109	40.867	43.219
653.5	17.365	18.675	19.645	19.064	17.299	16.918	17.522	19.197	18.96	21.141	20.132	22.369	22.844	20.898	21.229	20.742	21.563	20.197	19.738	18.967	18.891	20.411	21.242	18.122	15.838	17.195	18.495	18.85	18.455	27.028	40.457	43.08
654	17.314	18.647	19.618	19.07	17.266	16.888	17.567	19.072	18.9	21.19	20.139	22.27	22.793	20.873	21.118	20.567	21.518	20.208	19.766	19.073	18.845	20.304	21.234	18.145	15.834	17.149	18.525	18.812	18.417	27.228	40.169	42.911
654.5	17.17	18.574	19.605	19.063	17.258	16.94	17.559	18.954	18.816	21.241	20.118	22.233	22.795	20.813	20.994	20.417	21.439	20.179	19.818	19.173	18.87	20.266	21.267	18.135	15.86	17.144	18.513	18.796	18.372	27.344	40.011	42.829
655	17.018	18.526	19.701	19.062	17.303	16.994	17.497	18.879	18.708	21.205	19.986	22.227	22.765	20.748	20.954	20.346	21.401	20.097	19.811	19.144	18.875	20.275	21.227	18.054	15.868	17.148	18.47	18.825	18.308	27.64	40.129	42.805
655.5	16.981	18.483	19.855	19.045	17.317	17.012	17.438	18.854	18.623	21.085	19.827	22.252	22.726	20.662	20.978	20.344	21.356	19.981	19.749	19.054	18.846	20.267	21.092	17.972	15.84	17.187	18.395	18.865	18.205	27.685	40.389	43.037
656	17.071	18.49	19.918	19.096	17.272	17.003	17.476	18.796	18.562	20.951	19.736	22.237	22.715	20.664	21.028	20.352	21.329	19.965	19.672	18.977	18.838	20.237	20.965	17.979	15.745	17.171	18.353	18.905	18.171	27.661	40.853	43.272
656.5	17.119	18.398	19.811	19.098	17.229	16.964	17.547	18.711	18.496	20.907	19.755	22.117	22.703	20.702	20.98	20.371	21.279	20.027	19.599	18.946	18.864	20.211	20.976	18.047	15.683	17.215	18.359	18.897	18.205	27.485	41.288	43.485
657	17.041	18.272	19.66	19.061	17.156	16.91	17.561	18.648	18.396	20.921	19.807	21.923	22.549	20.729	20.943	20.44	21.28	20.06	19.567	18.934	18.895	20.295	21.032	18.075	15.649	17.279	18.374	18.874	18.291	27.396	41.543	43.535
657.5	16.859	18.177	19.551	18.995	17.107	16.825	17.52	18.55	18.314	20.85	19.733	21.756	22.359	20.642	20.898	20.448	21.178	20.085	19.557	18.943	18.797	20.363	21.104	18.035	15.687	17.369	18.408	18.805	18.289	27.269	41.332	43.418
658	16.749	18.162	19.47	18.996	17.087	16.766	17.472	18.415	18.262	20.737	19.666	21.689	22.301	20.505	20.822	20.418	20.926	20.034	19.534	18.899	18.66	20.381	21.05	17.995	15.689	17.353	18.354	18.724	18.243	27.143	40.917	43.097
658.5	16.816	18.189	19.385	19.053	17.075	16.75	17.483	18.191	18.161	20.561	19.538	21.574	22.294	20.42	20.724	20.407	20.718	20.008	19.407	18.848	18.609	20.335	20.937	17.99	15.65	17.314	18.282	18.708	18.192	27.326	40.52	42.611
659	16.825	18.188	19.36	19.078	17.002	16.766	17.511	18.062	17.994	20.384	19.416	21.427	22.194	20.366	20.737	20.351	20.646	19.981	19.322	18.793	18.611	20.385	20.805	17.922	15.574	17.282	18.236	18.711	18.147	27.563	40.517	42.305
659.5	16.767	18.176	19.35	19.002	16.999	16.777	17.501	17.978	17.815	20.215	19.276	21.292	22.038	20.332	20.76	20.227	20.714	19.954	19.287	18.73	18.597	20.472	20.768	17.823	15.529	17.347	18.293	18.752	18.123	27.867	40.651	42.369
660	16.621	18.204	19.322	18.863	17.086	16.816	17.434	17.916	17.676	20.051	19.225	21.325	21.984	20.251	20.734	20.106	20.74	19.881	19.283	18.687	18.537	20.491	20.771	17.759	15.596	17.379	18.37	18.72	18.137	27.79	40.538	42.422
660.5	16.585	18.171	19.263	18.818	17.191	16.824	17.38	17.778	17.546	19.999	19.218	21.303	21.941	20.17	20.645	20.108	20.646	19.726	19.167	18.569	18.427	20.387	20.708	17.734	15.634	17.363	18.296	18.688	18.125	27.512	40.368	42.467
661	16.558	18.135	19.221	18.904	17.154	16.815	17.354	17.63	17.449	19.947	19.195	21.224	21.838	20.143	20.666	20.213	20.547	19.621	19.08	18.547	18.389	20.248	20.633	17.775	15.61	17.302	18.153	18.626	18.064	27.312	40.437	42.562
661.5	16.527	18.084	19.165	19.035	17.055	16.785	17.345	17.501	17.371	19.978	19.151	21.106	21.712	20.107	20.69	20.266	20.447	19.617	19.059	18.557	18.34	20.188	20.537	17.778	15.497	17.313	18.12	18.605	17.982	27.217	40.674	42.652
662	16.528	18.113	19.131	19.073	17.002	16.791	17.339	17.4	17.262	19.896	19.08	21.024	21.623	20.117	20.721	20.213	20.482	19.66	19.054	18.626	18.336	20.159	20.568	17.741	15.444	17.347	18.222	18.578	17.954	27.237	40.645	42.613
662.5	16.635	18.21	19.174	19.116	17.049	16.801	17.328	17.322	17.118	19.807	18.975	20.995	21.582	20.117	20.706	20.175	20.57	19.645	18.979	18.62	18.261	20.125	20.59	17.725	15.484	17.354	18.214	18.546	18.013	27.39	40.404	42.148
663	16.69	18.301	19.232	19.193	17.088	16.788	17.33	17.243	16.97	19.71	18.907	20.958	21.519	20.154	20.723	20.198	20.608	19.58	18.888	18.594	18.193	20.134	20.637	17.656	15.51	17.41	18.163	18.523	18.037	27.781	40.312	41.956
663.5	16.634	18.283	19.231	19.29	17.155	16.785	17.323	17.155	16.865	19.616	18.83	20.949	21.448	20.188	20.677	20.247	20.531	19.561	18.898	18.564	18.134	20.098	20.573	17.595	15.492	17.503	18.146	18.451	17.99	28.211	40.412	41.963
664	16.536	18.224	19.175	19.314	17.184	16.79	17.372	17.064	16.755	19.539	18.781	20.873	21.328	20.139	20.666	20.209	20.403	19.568	18.932	18.576	18.092	20.124	20.441	17.492	15.472	17.545	18.273	18.397	17.936	28.151	40.426	41.909
664.5	16.443	18.119	19.082	19.29	17.204	16.797	17.463	16.961	16.634	19.416	18.621	20.781	21.239	20.023	20.639	20.14	20.316	19.587	18.891	18.534	18.038	20.103	20.313	17.444	15.479	17.497	18.306	18.36	17.933	27.811	40.45	41.558
665	16.383	18.105	19.071	19.197	17.149	16.788	17.481	16.857	16.453	19.364	18.576	20.742	21.194	19.896	20.541	20.121	20.231	19.627	18.768	18.488	18.021	20.152	20.247	17.456	15.486	17.424	18.322	18.411	17.985	27.739	40.396	41.434
665.5	16.323	18.079	19.105	19.083	17.106	16.79	17.416	16.745	16.282	19.298	18.533	20.699	21.162	19.875	20.416	20.115	20.126	19.647	18.676	18.507	18.027	20.188	20.256	17.453	15.471	17.406	18.297	18.454	17.992	27.717	40.417	41.517
666	16.273	18.073	19.181	18.976	17.031	16.823	17.319	16.627	16.119	19.191	18.53	20.656	21.044	19.934	20.397	20.169	20.083	19.643	18.735	18.567	18.085	20.218	20.274	17.479	15.426	17.487	18.341	18.408	17.937	27.639	40.307	41.655
666.5	16.254	18.026	19.184	18.9	17.029	16.869	17.335	16.551	16.061	19.194	18.512	20.56	21.01	20.026	20.498	20.126	20.112	19.592	18.794	18.618	18.135	20.234	20.316	17.445	15.37	17.614	18.389	18.378	17.852	27.649	40.127	41.484
667	16.257	18.032	19.115	18.866	16.993	16.884	17.356	16.526	16.056	19.183	18.535	20.44	21.052	20.082	20.543	20.033	20.204	19.577	18.788	18.617	18.124	20.283	20.369	17.461	15.404	17.68	18.396	18.34	17.778	27.877	39.971	41.261
667.5	16.314	18.051	19.097	18.87	17.036	16.847	17.346	16.54	16.094	19.215	18.598	20.312	21.118	20.085	20.493	19.925	20.278	19.616	18.717	18.67	18.044	20.344	20.374	17.452	15.491	17.635	18.38	18.328	17.732	28.075	40.04	41.304
668	16.331	18.059	19.047	18.982	17.061	16.799	17.312	16.539	16.104	19.078	18.581	20.208	21.11	20.034	20.431	19.911	20.29	19.672	18.611	18.751	17.908	20.342	20.348	17.404	15.532	17.629	18.334	18.276	17.731	27.984	40.084	41.186
668.5	16.375	18.046	19.036	19.087	17.103	16.747	17.34	16.472	16.079	18.999	18.588	20.239	21.02	19.907	20.452	19.969	20.263	19.709	18.579	18.849	17.873	20.318	20.26	17.394	15.457	17.707	18.363	18.292	17.733	27.745	39.809	41.204
669	16.394	18.079	19.042	19.076	17.1	16.682	17.405	16.359	16.015	18.959	18.632	20.324	20.958	19.841	20.552	20.014	20.258	19.689	18.58	18.84	17.861	20.311	20.189	17.419	15.366	17.815	18.388	18.315	17.736	27.389	39.344	41.095
669.5	16.422	18.111	19.151	18.986	17.102	16.665	17.439	16.287	15.966	18.921	18.679	20.304	20.892	19.821	20.631	19.99	20.231	19.647	18.611	18.794	17.88	20.364	20.098	17.483	15.341	17.802	18.438	18.293	17.739	27.216	39.174	41.188
670	16.37	18.113	19.236	18.932	17.138	16.758	17.444	16.278	15.893	18.879	18.659	20.185	20.877	19.873	20.619	20.001	20.233	19.662	18.592	18.721	17.895	20.3	20.054	17.455	15.406	17.73	18.419	18.261	17.776	27.24	39.376	41.188
670.5	16.307	18.012	19.196	18.947	17.123	16.919	17.42	16.304	15.855	18.863	18.508	20.087	20.87	19.879	20.518	19.924	20.171	19.702	18.541	18.712	17.962	20.26	20.05	17.42	15.566	17.626	18.45	18.286	17.827	27.647	39.767	41.012
671	16.293	17.94	19.113	18.992	17.14	17.034	17.421	16.294	15.824	18.909	18.438	20.072	20.852	19.891	20.503	19.858	20.108	19.741	18.518	18.739	17.965	20.287	20.108	17.479	15.652	17.624	18.493	18.331	17.821	27.738	39.79	40.9
671.5	16.28	17.923	19.019	18.986	17.2	17.056	17.476	16.293	15.849	18.929	18.373	20.048	20.793	19.933	20.574	19.784	20.049	19.71	18.499	18.711	17.939	20.394	20.148	17.52	15.677	17.69	18.559	18.347	17.821	27.805	39.544	40.718
672	16.288	17.957	18.947	19.038	17.309	17.037	17.555	16.369	15.917	18.93	18.377	20.007	20.768	20.007	20.666	19.761	20.018	19.672	18.505	18.672	17.885	20.518	20.218	17.549	15.592	17.799	18.6	18.321	17.818	27.703	39.319	40.67
672.5	16.227	17.995	18.917	19.041	17.301	16.989	17.559	16.423	15.968	18.971	18.39	20.038	20.812	19.996	20.658	19.759	20.08	19.642	18.551	18.637	17.894	20.566	20.257	17.542	15.57	17.922	18.607	18.352	17.845	27.871	39.613	40.898
673	16.26	18.038	18.895	19.069	17.223	16.993	17.507	16.402	15.954	18.993	18.423	20.077	20.828	20.022	20.688	19.847	20.087	19.642	18.617	18.664	17.881	20.546	20.258	17.564	15.581	18.005	18.578	18.362	17.886	28.037	39.874	41.071
673.5	16.318	18.15	18.936	19.086	17.141	17.02	17.476	16.337	15.92	19.007	18.458	20.178	20.776	20.052	20.696	20.027	20.139	19.573	18.635	18.699	17.837	20.461	20.211	17.541	15.665	18.029	18.549	18.419	17.918	28.006	39.866	40.888
674	16.436	18.298	19.019	19.18	17.192	17.106	17.619	16.335	15.868	19.022	18.518	20.302	20.776	20.121	20.721	20.162	20.148	19.602	18.629	18.713	17.84	20.43	20.204	17.48	15.682	17.948	18.534	18.402	17.912	27.849	39.613	40.462
674.5	16.413	18.428	19.123	19.246	17.32	17.123	17.76	16.445	15.881	19.01	18.603	20.444	20.892	20.152	20.709	20.201	20.204	19.684	18.603	18.686	17.814	20.498	20.216	17.436	15.646	17.943	18.654	18.372	17.853	27.509	39.746	40.328
675	16.352	18.449	19.192	19.213	17.42	17.118	17.865	16.543	15.906	19.016	18.624	20.437	21.108	20.112	20.612	20.149	20.247	19.814	18.608	18.687	17.828	20.581	20.208	17.447	15.608	18.05	18.758	18.351	17.835	27.304	39.805	40.616
675.5	16.265	18.394	19.141	19.085	17.403	17.056	17.851	16.627	15.974	19.043	18.587	20.325	21.197	20.085	20.539	20.13	20.314	19.849	18.622	18.774	17.891	20.62	20.243	17.529	15.705	18.22	18.832	18.4	17.855	27.208	39.84	40.713
676	16.31	18.304	19.067	19.02	17.322	17.087	17.834	16.611	15.984	19.082	18.607	20.245	21.227	20.051	20.54	20.158	20.333	19.857	18.67	18.931	17.989	20.641	20.246	17.583	15.81	18.322	18.817	18.496	17.902	27.214	39.654	40.897
676.5	16.381	18.346	19.043	19.077	17.281	17.198	17.828	16.578	15.953	19.088	18.741	20.34	21.232	20.098	20.701	20.163	20.338	19.83	18.689	19.038	18.071	20.726	20.235	17.611	15.871	18.309	18.77	18.53	17.931	27.527	39.748	40.911
677	16.606	18.467	19.078	19.202	17.375	17.338	17.862	16.548	15.94	19.096	18.897	20.536	21.298	20.127	20.743	20.13	20.297	19.775	18.715	19.05	18.093	20.815	20.194	17.631	15.858	18.263	18.781	18.476	17.942	27.668	39.527	40.757
677.5	16.669	18.595	19.081	19.221	17.453	17.394	17.882	16.589	15.982	19.19	18.925	20.743	21.369	20.077	20.649	20.011	20.238	19.742	18.751	19.075	18.098	20.857	20.231	17.712	15.901	18.226	18.805	18.401	17.951	27.824	39.315	40.76
678	16.638	18.511	18.994	19.134	17.47	17.344	17.907	16.656	16.013	19.345	18.919	20.8	21.433	20.026	20.566	19.948	20.205	19.813	18.788	19.115	18.124	20.812	20.311	17.733	15.944	18.236	18.899	18.412	17.952	27.809	39.015	40.772
678.5	16.502	18.405	18.947	19.062	17.401	17.301	17.927	16.663	16.051	19.516	18.865	20.786	21.49	20.015	20.607	19.945	20.179	19.929	18.766	19.108	18.102	20.754	20.317	17.759	15.989	18.319	19.019	18.455	17.948	27.865	39.465	41.092
679	16.509	18.414	19.027	19.071	17.395	17.283	17.965	16.637	16.077	19.565	18.866	20.753	21.501	20.06	20.741	20.011	20.178	19.949	18.743	19.064	18.057	20.776	20.339	17.711	15.969	18.378	19.126	18.497	17.942	27.978	39.643	41.025
679.5	16.576	18.52	19.229	19.175	17.47	17.35	17.981	16.667	16.176	19.541	18.912	20.775	21.506	20.067	20.819	20.073	20.16	19.96	18.772	19.104	18.05	20.83	20.409	17.778	15.976	18.459	19.206	18.458	17.937	27.892	39.936	41.201
680	16.613	18.535	19.367	19.198	17.523	17.444	17.986	16.775	16.275	19.518	19.01	20.868	21.614	20.089	20.807	20.127	20.226	19.972	18.861	19.247	18.126	20.902	20.471	17.834	16.015	18.49	19.211	18.496	17.948	27.976	39.856	41.37
680.5	16.656	18.496	19.473	19.344	17.505	17.53	18.068	16.917	16.403	19.609	19.066	20.973	21.861	20.129	20.77	20.153	20.324	20.072	18.963	19.3	18.279	21	20.529	17.889	16.086	18.577	19.3	18.523	17.985	28.037	39.955	41.398
681	16.72	18.539	19.447	19.449	17.451	17.522	18.155	17.036	16.477	19.707	19.035	21.031	21.983	20.206	20.786	20.207	20.385	20.158	18.987	19.295	18.352	21.076	20.564	17.904	16.184	18.627	19.436	18.595	18.065	28.26	39.882	41.084
681.5	16.706	18.558	19.422	19.502	17.449	17.513	18.236	17.145	16.503	19.857	18.987	21.08	22.012	20.261	20.823	20.261	20.348	20.281	19.001	19.255	18.376	21.1	20.669	17.89	16.228	18.679	19.55	18.628	18.149	28.44	39.831	40.91
682	16.748	18.484	19.365	19.475	17.481	17.575	18.295	17.282	16.555	20.052	19.092	21.16	22.023	20.293	20.795	20.306	20.328	20.398	19.063	19.318	18.377	21.134	20.784	17.9	16.208	18.709	19.557	18.646	18.163	28.288	39.907	41.043
682.5	16.851	18.453	19.378	19.528	17.52	17.683	18.327	17.393	16.636	20.187	19.225	21.315	22.196	20.232	20.757	20.313	20.306	20.441	19.178	19.398	18.403	21.106	20.873	17.934	16.13	18.698	19.452	18.651	18.162	27.907	40.021	41.398
683	17.053	18.506	19.322	19.651	17.548	17.759	18.368	17.51	16.806	20.236	19.396	21.449	22.42	20.183	20.701	20.244	20.284	20.414	19.276	19.47	18.45	21.097	20.891	17.966	16.093	18.764	19.444	18.661	18.167	27.431	39.981	41.555
683.5	17.191	18.627	19.329	19.694	17.636	17.824	18.454	17.638	16.947	20.284	19.531	21.532	22.601	20.172	20.694	20.157	20.299	20.388	19.309	19.479	18.503	21.04	20.828	18.018	16.143	18.821	19.485	18.736	18.212	27.368	39.983	41.62
684	17.165	18.672	19.413	19.596	17.636	17.912	18.536	17.794	17.109	20.388	19.713	21.636	22.748	20.233	20.678	20.08	20.338	20.415	19.351	19.458	18.633	21.166	20.898	18.075	16.234	18.838	19.607	18.813	18.281	27.544	39.894	41.733
684.5	17.094	18.756	19.538	19.517	17.591	17.927	18.574	17.928	17.235	20.563	19.826	21.772	22.876	20.312	20.759	20.125	20.431	20.492	19.383	19.456	18.716	21.315	21.061	18.171	16.337	18.762	19.595	18.861	18.341	27.919	40.082	41.848
685	17.085	18.848	19.624	19.466	17.516	17.868	18.54	18.046	17.432	20.794	19.897	21.961	23.093	20.332	20.872	20.189	20.488	20.52	19.436	19.529	18.749	21.416	21.24	18.227	16.374	18.684	19.586	18.887	18.353	28.236	40.334	41.794
685.5	17.196	18.975	19.749	19.53	17.531	17.799	18.561	18.195	17.648	21.061	20.048	22.155	23.293	20.313	20.908	20.219	20.436	20.574	19.544	19.668	18.841	21.42	21.304	18.26	16.398	18.719	19.6	18.903	18.403	28.339	40.717	41.71
686	17.22	18.986	19.839	19.494	17.542	17.819	18.635	18.423	17.913	21.296	20.315	22.342	23.502	20.232	20.828	20.174	20.363	20.668	19.765	19.813	19.014	21.421	21.371	18.269	16.423	18.789	19.666	18.994	18.48	28.084	41.081	41.787
686.5	17.214	18.964	19.91	19.502	17.511	17.87	18.739	18.727	18.161	21.47	20.557	22.567	23.786	20.169	20.687	20.19	20.328	20.844	20.004	19.912	19.217	21.471	21.413	18.335	16.506	18.907	19.743	19.137	18.658	27.704	41.15	41.949
687	17.26	18.931	19.926	19.53	17.525	17.964	18.803	19.12	18.503	21.703	20.687	22.786	24.12	20.169	20.615	20.194	20.412	20.971	20.21	19.925	19.303	21.565	21.519	18.411	16.558	18.912	19.821	19.288	18.753	27.578	41.262	42.275
687.5	17.435	18.999	20.07	19.694	17.555	18.061	18.782	19.512	18.837	21.999	20.833	23.071	24.463	20.279	20.675	20.18	20.544	21.036	20.321	19.967	19.467	21.629	21.665	18.547	16.584	18.904	19.956	19.359	18.832	27.694	41.29	42.794
688	17.596	19.093	20.193	19.837	17.653	18.152	18.765	19.933	19.226	22.437	21.089	23.378	24.781	20.453	20.774	20.177	20.713	21.176	20.504	20.079	19.701	21.642	21.939	18.722	16.701	18.894	20.039	19.4	18.886	27.865	41.395	43.235
688.5	17.797	19.128	20.309	19.928	17.729	18.209	18.822	20.304	19.55	22.933	21.439	23.743	25.159	20.637	20.874	20.265	20.921	21.462	20.812	20.259	19.966	21.677	22.23	18.971	16.843	18.906	20.092	19.465	19	28.079	41.496	43.615
689	17.976	19.2	20.344	19.957	17.829	18.206	18.987	20.735	19.954	23.365	21.769	24.137	25.573	20.617	20.892	20.37	21.063	21.76	21.189	20.479	20.241	21.778	22.516	19.154	16.995	18.84	20.164	19.605	19.17	28.539	41.561	43.969
689.5	18.249	19.439	20.481	20.012	17.943	18.29	19.122	21.135	20.379	23.776	22.134	24.626	25.985	20.625	20.898	20.453	21.192	21.976	21.497	20.667	20.476	21.893	22.721	19.336	17.084	18.824	20.376	19.729	19.332	28.866	41.785	44.476
690	18.501	19.775	20.626	19.998	18.015	18.411	19.211	21.627	20.906	24.187	22.523	25.148	26.387	20.703	20.978	20.608	21.369	22.154	21.734	20.808	20.651	21.934	22.918	19.491	17.268	18.864	20.687	19.914	19.525	28.925	42.226	45.015
690.5	18.813	20.044	20.871	19.94	17.997	18.601	19.287	22.143	21.434	24.647	22.964	25.669	26.776	20.999	21.133	20.807	21.625	22.422	22.048	20.995	20.923	21.945	23.14	19.741	17.54	18.901	20.933	20.076	19.694	28.79	42.57	45.518
691	19.082	20.235	21.138	19.95	17.904	18.787	19.418	22.689	21.941	25.129	23.436	26.157	27.224	21.282	21.325	20.977	21.876	22.706	22.393	21.115	21.229	21.998	23.379	19.97	17.737	18.888	21.125	20.206	19.881	28.858	42.742	46.05
691.5	19.349	20.403	21.379	20.026	17.803	18.962	19.55	23.263	22.449	25.767	23.951	26.648	27.831	21.56	21.522	21.139	22.185	23.019	22.793	21.306	21.548	22.111	23.635	20.186	17.934	18.947	21.321	20.331	20.074	29.065	43.036	46.368
692	19.609	20.654	21.583	20.188	17.78	19.126	19.671	23.945	23.079	26.599	24.486	27.238	28.558	21.776	21.797	21.293	22.592	23.358	23.24	21.546	21.868	22.303	23.969	20.443	18.116	19.005	21.604	20.564	20.335	29.384	43.776	46.554
692.5	19.883	20.909	21.839	20.26	17.878	19.358	19.835	24.663	23.785	27.442	25.129	27.941	29.25	21.985	21.999	21.437	23.013	23.784	23.743	21.93	22.266	22.546	24.26	20.685	18.343	19.093	21.895	20.855	20.538	29.724	44.262	47.029
693	20.216	21.221	22.18	20.435	18.026	19.662	20.079	25.391	24.441	28.122	25.786	28.703	29.894	22.202	22.202	21.642	23.439	24.267	24.224	22.381	22.719	22.778	24.533	21.033	18.587	19.185	22.21	21.147	20.774	30.007	44.074	47.764
693.5	20.575	21.509	22.507	20.613	18.199	19.934	20.352	26.054	25.017	28.79	26.468	29.53	30.558	22.538	22.38	22.007	23.807	24.712	24.656	22.81	23.175	22.963	24.809	21.38	18.882	19.368	22.552	21.365	21.004	30.18	43.881	48.921
694	20.921	21.816	22.819	20.822	18.344	20.198	20.656	26.727	25.671	29.48	27.156	30.284	31.305	22.888	22.595	22.422	24.2	25.177	25.077	23.176	23.704	23.147	25.199	21.831	19.298	19.427	22.943	21.646	21.361	30.445	44.293	49.855
694.5	21.263	22.137	23.137	21.038	18.54	20.414	20.937	27.437	26.401	30.217	27.839	30.966	31.912	23.254	22.893	22.789	24.647	25.709	25.517	23.505	24.206	23.335	25.623	22.358	19.827	19.579	23.357	21.87	21.605	30.811	45.116	50.41
695	21.663	22.519	23.507	21.244	18.736	20.687	21.26	28.14	27.175	30.866	28.491	31.556	32.504	23.643	23.269	23.107	25.18	26.281	25.955	23.875	24.644	23.519	25.989	22.95	20.365	19.71	23.733	22.092	21.844	31.14	45.46	50.553
695.5	22.039	22.817	23.865	21.328	18.938	20.989	21.628	28.851	27.916	31.505	29.119	32.256	33.135	24.064	23.69	23.459	25.684	26.878	26.414	24.336	25.02	23.756	26.362	23.519	20.815	19.862	24.044	22.316	22.09	31.126	45.623	50.997
696	22.341	23.112	24.277	21.401	19.146	21.431	22.028	29.555	28.612	32.255	29.817	33.125	34.012	24.518	23.997	23.767	26.138	27.484	26.949	24.784	25.404	24.019	26.693	24.025	21.139	19.964	24.494	22.622	22.48	31.314	45.76	51.789
696.5	22.62	23.376	24.633	21.589	19.314	21.854	22.453	30.31	29.242	33.033	30.572	34.007	34.819	25.027	24.338	24.189	26.637	28.06	27.432	25.254	25.754	24.211	27.059	24.491	21.514	20.177	25.094	22.929	22.869	31.672	46.18	52.713
697	22.996	23.796	25.013	21.96	19.58	22.222	22.825	31.048	29.847	33.826	31.31	34.787	35.46	25.673	24.773	24.67	27.214	28.583	27.948	25.759	26.225	24.355	27.375	24.936	21.928	20.477	25.73	23.254	23.211	32.309	46.542	53.408
697.5	23.388	24.25	25.397	22.348	19.89	22.559	23.238	31.745	30.472	34.612	32.039	35.462	36.035	26.296	25.275	25.231	27.718	29.092	28.422	26.324	26.736	24.542	27.78	25.348	22.418	20.792	26.304	23.587	23.51	32.55	46.898	53.93
698	23.786	24.737	25.823	22.621	20.177	23.005	23.686	32.464	31.108	35.464	32.779	36.179	36.663	26.719	25.724	25.648	28.113	29.719	28.964	26.902	27.304	24.861	28.133	25.811	22.87	21.082	26.808	23.958	23.825	32.795	47.67	54.474
698.5	24.154	25.164	26.261	22.838	20.386	23.517	24.204	33.223	31.717	36.225	33.474	36.964	37.351	27.085	26.18	26.091	28.553	30.322	29.466	27.474	27.752	25.293	28.451	26.361	23.368	21.394	27.293	24.255	24.138	33.061	48.437	55.364
699	24.547	25.543	26.647	23.021	20.522	24.037	24.682	33.908	32.34	36.821	34.125	37.778	37.932	27.554	26.64	26.53	29.061	30.872	30.034	28.044	28.194	25.7	28.701	26.885	23.86	21.741	27.752	24.437	24.457	33.637	49.202	56.542
699.5	24.884	25.862	27.133	23.298	20.63	24.498	25.014	34.586	32.963	37.3	34.754	38.548	38.607	28.195	27.094	27.149	29.679	31.452	30.584	28.63	28.615	26.044	29.049	27.415	24.367	22.122	28.243	24.607	24.762	34.283	49.383	57.706
700	25.298	26.236	27.45	23.561	20.689	24.981	25.371	35.347	33.607	37.902	35.361	39.344	39.203	28.821	27.599	27.79	30.334	32.065	31.089	29.182	29.106	26.312	29.48	27.922	24.965	22.564	28.834	24.841	25.084	34.754	49.26	58.246
700.5	25.674	26.652	27.804	23.849	20.802	25.522	25.829	36.077	34.239	38.592	35.975	40.076	39.745	29.44	28.116	28.38	30.973	32.729	31.503	29.668	29.62	26.628	29.902	28.524	25.48	22.923	29.386	25.178	25.468	35.175	49.325	58.584
701	25.944	27.135	28.054	24.077	21.014	26.107	26.396	36.648	34.898	39.336	36.504	40.751	40.186	30.012	28.576	28.835	31.58	33.361	31.925	30.099	30.134	26.878	30.291	29.111	25.98	23.244	29.992	25.534	25.924	35.48	49.692	58.992
701.5	26.165	27.584	28.498	24.292	21.263	26.573	26.938	37.149	35.566	40.11	37.207	41.434	40.807	30.61	28.99	29.337	32.031	33.91	32.259	30.494	30.57	27.207	30.705	29.737	26.365	23.484	30.476	25.887	26.342	35.91	50.41	59.718
702	26.548	28.085	28.921	24.598	21.522	27.01	27.455	37.694	36.096	40.859	38.014	42.184	41.494	31.176	29.404	29.912	32.529	34.463	32.693	30.936	30.986	27.565	30.934	30.273	26.861	23.701	30.951	26.21	26.678	36.391	50.948	60.57
702.5	26.984	28.565	29.317	24.881	21.708	27.435	27.927	38.236	36.522	41.504	38.825	42.928	42.225	31.685	29.919	30.506	33.04	35.083	33.174	31.537	31.423	28.057	31.15	30.792	27.409	24.027	31.468	26.512	26.934	36.883	51.579	61.504
703	27.407	29.167	29.708	25.155	21.873	27.936	28.299	38.726	36.924	42.02	39.436	43.515	42.744	32.096	30.447	31.069	33.594	35.775	33.719	32.118	31.86	28.437	31.359	31.284	27.911	24.386	31.979	26.764	27.218	37.335	52.266	62.542
703.5	27.783	29.671	30.097	25.309	22.04	28.536	28.732	39.193	37.418	42.476	39.915	44.145	43.255	32.487	30.912	31.477	34.042	36.28	34.081	32.595	32.263	28.859	31.67	31.806	28.367	24.827	32.385	27.023	27.51	37.772	52.97	63.528
704	28.137	30.094	30.571	25.558	22.236	29.138	29.203	39.697	37.973	42.951	40.475	44.7	43.626	32.882	31.256	31.889	34.396	36.769	34.443	32.975	32.583	29.211	31.993	32.318	28.793	25.23	32.774	27.254	27.81	38.332	53.403	64
704.5	28.39	30.35	30.899	25.837	22.418	29.683	29.691	40.203	38.556	43.466	41.104	45.289	44.007	33.295	31.627	32.287	34.729	37.353	34.762	33.544	32.936	29.562	32.385	32.889	29.239	25.668	33.369	27.533	28.082	38.772	53.745	64.549
705	28.596	30.564	31.216	26.126	22.66	30.152	30.135	40.792	39.127	44.032	41.795	45.867	44.395	33.826	32.127	32.76	35.174	38.016	35.055	34.193	33.341	29.898	32.827	33.501	29.756	26.168	34.024	27.764	28.295	39.239	54.267	65.099
705.5	28.801	30.846	31.539	26.301	22.927	30.663	30.619	41.329	39.601	44.558	42.357	46.562	44.927	34.422	32.601	33.177	35.669	38.679	35.424	34.873	33.795	30.256	33.204	34.133	30.407	26.625	34.53	28.033	28.509	39.741	54.871	65.796
706	28.994	31.22	31.947	26.522	23.17	31.222	31.121	41.832	39.976	45.025	42.815	47.214	45.473	34.961	33.054	33.672	36.11	39.255	35.917	35.426	34.17	30.664	33.457	34.615	31.033	27.084	34.909	28.306	28.815	40.159	55.221	65.909
706.5	29.215	31.697	32.261	26.751	23.383	31.864	31.624	42.44	40.359	45.488	43.235	47.769	46.065	35.39	33.41	34.199	36.543	39.701	36.348	35.876	34.46	31.021	33.663	35.044	31.529	27.469	35.349	28.531	29.175	40.427	55.142	65.878
707	29.537	32.23	32.566	27.006	23.621	32.489	32.149	42.978	40.753	45.988	43.74	48.233	46.546	35.77	33.839	34.732	36.966	40.072	36.653	36.23	34.721	31.464	33.92	35.397	31.796	27.873	35.79	28.691	29.558	40.992	55.277	66.407
707.5	29.909	32.728	32.915	27.21	23.901	33.065	32.692	43.415	41.151	46.511	44.301	48.747	47.037	36.218	34.308	35.18	37.35	40.607	36.875	36.639	35.062	31.869	34.233	35.771	32.124	28.346	36.225	28.925	29.843	41.653	55.533	67.438
708	30.327	33.177	33.311	27.531	24.223	33.491	33.21	43.621	41.488	46.987	44.883	49.309	47.38	36.675	34.828	35.671	37.765	41.251	37.261	37.14	35.385	32.246	34.564	36.227	32.572	28.919	36.661	29.252	30.103	42.242	56.129	68.675
708.5	30.72	33.504	33.623	27.96	24.498	33.889	33.658	43.937	41.88	47.499	45.5	49.966	47.851	37.159	35.249	36.156	38.176	41.883	37.63	37.654	35.754	32.511	34.756	36.764	33.121	29.486	37.166	29.536	30.318	42.59	56.805	69.598
709	31.058	33.778	33.918	28.252	24.743	34.349	34.036	44.331	42.318	48.015	46.104	50.603	48.328	37.516	35.58	36.638	38.615	42.444	37.978	38.191	36.112	32.869	34.899	37.299	33.552	29.902	37.706	29.732	30.536	42.819	57.413	70.221
709.5	31.209	34.041	34.167	28.419	24.883	34.938	34.442	44.76	42.68	48.463	46.514	51.029	48.696	37.813	35.887	37.084	38.941	43.062	38.21	38.626	36.551	33.313	35.158	37.842	33.908	30.28	38.118	29.894	30.771	43.277	57.75	70.332
710	31.292	34.381	34.429	28.579	25.027	35.53	34.93	45.127	43.052	48.91	46.804	51.435	49.026	38.257	36.28	37.565	39.313	43.651	38.495	39.027	36.923	33.775	35.435	38.309	34.305	30.748	38.427	30.024	31.069	43.841	57.68	70.565
710.5	31.456	34.764	34.671	28.879	25.175	36.069	35.439	45.552	43.429	49.289	47.092	51.796	49.424	38.765	36.729	37.983	39.709	44.072	38.799	39.376	37.235	34.161	35.672	38.794	34.758	31.242	38.794	30.099	31.43	44.243	57.871	70.798
711	31.629	35.145	34.908	29.173	25.379	36.543	35.913	46.006	43.912	49.658	47.523	52.275	49.785	39.312	37.347	38.338	40.09	44.372	39.08	39.818	37.552	34.458	35.841	39.159	35.215	31.767	39.273	30.255	31.762	44.535	58.076	71.29
711.5	31.83	35.544	35.234	29.403	25.588	37.092	36.443	46.437	44.263	50.051	48.011	52.705	50.177	39.747	37.864	38.664	40.379	44.778	39.327	40.29	37.869	34.769	36.026	39.482	35.63	32.241	39.892	30.459	31.961	44.823	58.753	71.787
712	31.974	36.018	35.605	29.602	25.829	37.731	37.059	46.746	44.589	50.462	48.526	53.108	50.418	40.054	38.167	39.06	40.574	45.369	39.63	40.832	38.181	35.14	36.286	39.709	35.997	32.73	40.422	30.734	32.132	45.273	59.25	72.367
712.5	32.219	36.473	35.995	29.815	26.117	38.356	37.648	47.048	44.869	50.798	49.018	53.509	50.693	40.3	38.378	39.521	40.803	45.999	39.981	41.483	38.462	35.561	36.507	40.033	36.406	33.189	40.88	30.976	32.32	45.665	59.754	72.942
713	32.5	36.756	36.365	30.069	26.385	38.868	38.043	47.272	45.161	51.124	49.433	53.959	50.88	40.535	38.584	39.942	41.112	46.491	40.363	42.119	38.734	35.973	36.786	40.47	36.889	33.686	41.17	31.219	32.658	46.342	59.9	73.593
713.5	32.817	36.906	36.652	30.214	26.644	39.305	38.366	47.632	45.445	51.608	49.844	54.551	51.232	40.981	38.935	40.313	41.578	46.932	40.648	42.616	38.926	36.39	36.946	40.85	37.348	34.215	41.457	31.372	32.979	46.989	59.899	74.486
714	33.057	37.169	36.848	30.324	26.899	39.77	38.716	48.066	45.745	52.151	50.275	55.202	51.687	41.467	39.272	40.675	41.962	47.355	40.845	42.964	39.131	36.868	37.017	41.196	37.676	34.734	41.739	31.59	33.245	47.492	60.047	75.077
714.5	33.193	37.543	36.93	30.524	27.162	40.226	39.188	48.424	46.012	52.495	50.782	55.684	52.134	41.92	39.645	41.141	42.312	47.773	41.036	43.243	39.352	37.41	37.063	41.564	38.013	35.237	42.143	31.869	33.44	47.814	60.435	75.363
715	33.345	38.027	36.968	30.941	27.306	40.633	39.736	48.604	46.22	52.722	51.179	55.988	52.413	42.264	39.97	41.679	42.543	48.179	41.233	43.608	39.609	37.823	37.25	42.132	38.456	35.74	42.631	32.102	33.686	48.152	60.798	75.188
715.5	33.506	38.393	37.219	31.325	27.504	41.153	40.259	48.792	46.383	52.966	51.477	56.286	52.559	42.49	40.232	41.975	42.767	48.468	41.384	43.916	39.839	38.11	37.59	42.564	38.844	36.183	43.032	32.227	33.917	48.575	61.158	75.342
716	33.761	38.661	37.615	31.546	27.703	41.704	40.699	49.12	46.672	53.267	51.63	56.649	52.727	42.725	40.476	42.252	43.01	48.833	41.579	44.261	40.128	38.432	37.923	42.855	39.172	36.641	43.399	32.311	34.098	48.753	61.388	75.59
716.5	34.089	38.907	38.147	31.725	27.904	42.347	41.063	49.417	46.977	53.553	51.897	57.042	53.047	42.977	40.704	42.545	43.19	49.319	41.936	44.728	40.515	38.924	38.151	43.132	39.451	37.13	43.785	32.517	34.311	48.921	61.68	76.456
717	34.521	39.211	38.476	31.955	28.093	43.006	41.513	49.725	47.402	53.864	52.282	57.387	53.436	43.367	41.066	42.961	43.405	49.984	42.365	45.284	40.894	39.407	38.252	43.546	39.745	37.667	44.217	32.726	34.606	48.989	62.139	77.33
717.5	34.79	39.44	38.647	32.16	28.286	43.617	41.973	50.07	47.867	54.215	52.655	57.752	53.735	43.682	41.478	43.325	43.626	50.457	42.604	45.785	41.225	39.687	38.476	44.047	40.041	38.115	44.565	32.94	34.869	49.153	62.899	78.226
718	34.905	39.677	38.847	32.407	28.456	44.096	42.484	50.453	48.282	54.584	52.991	58.116	53.962	43.897	41.772	43.604	43.817	50.82	42.697	46.144	41.458	39.953	38.779	44.463	40.483	38.53	44.952	33.103	35.027	49.512	63.378	78.542
718.5	34.982	39.904	39.054	32.608	28.559	44.418	42.92	50.697	48.443	54.948	53.45	58.562	54.224	43.949	41.798	43.788	43.962	51.097	42.863	46.533	41.646	40.376	39.004	44.828	40.895	39.025	45.437	33.267	35.18	49.853	63.458	78.538
719	35.181	40.254	39.294	32.798	28.697	44.793	43.318	50.862	48.504	55.152	53.912	58.921	54.496	44.132	41.875	43.943	44.108	51.455	43.066	46.956	41.865	40.834	39.004	45.064	41.23	39.445	45.746	33.459	35.418	50.694	63.706	78.351
719.5	35.401	40.562	39.555	32.955	28.897	45.183	43.662	51.063	48.661	55.357	54.259	59.223	54.675	44.377	42.105	44.175	44.377	51.753	43.193	47.286	42.101	41.248	39.026	45.277	41.432	39.843	45.925	33.59	35.627	51.605	63.893	78.502
720	35.64	40.906	39.804	33.157	29.137	45.648	43.976	51.356	48.897	55.572	54.503	59.457	54.86	44.739	42.524	44.547	44.659	52.08	43.264	47.533	42.381	41.574	39.258	45.515	41.746	40.179	46.112	33.708	35.8	52.497	64.167	79.255
720.5	35.772	41.203	39.954	33.382	29.327	46.094	44.293	51.71	49.104	55.959	54.898	59.834	55.2	45.039	42.836	44.913	44.804	52.574	43.388	47.835	42.532	41.849	39.55	45.829	42.126	40.655	46.345	33.794	35.944	52.842	64.447	80.065
721	35.922	41.425	40.091	33.56	29.466	46.546	44.662	52.097	49.288	56.279	55.314	60.262	55.557	45.246	43.001	45.179	44.848	53.138	43.604	48.14	42.606	42.129	39.751	46.122	42.497	41.241	46.56	33.975	36.173	52.546	64.972	80.458
721.5	35.993	41.614	40.3	33.781	29.597	46.924	45.068	52.333	49.514	56.57	55.658	60.566	55.706	45.435	43.132	45.443	44.942	53.575	43.833	48.45	42.666	42.499	39.889	46.49	42.747	41.801	46.778	34.079	36.398	52.135	65.079	80.517
722	36.066	41.907	40.503	33.941	29.759	47.444	45.486	52.435	49.76	56.656	55.846	60.783	55.737	45.633	43.369	45.605	45.179	53.921	44.05	48.836	42.944	42.898	40.028	46.839	43.004	42.221	47.086	34.108	36.51	52.213	65.245	80.829
722.5	36.13	42.208	40.63	34.081	29.921	47.957	45.896	52.542	49.925	56.668	55.861	60.901	55.81	45.858	43.6	45.814	45.396	54.339	44.299	49.278	43.298	43.257	40.214	47.13	43.335	42.623	47.408	34.098	36.564	52.862	65.312	81.255
723	36.233	42.511	40.847	34.185	30.052	48.401	46.316	52.849	50.093	56.775	55.925	61.268	56.034	45.921	43.78	46.002	45.523	54.694	44.532	49.745	43.593	43.652	40.52	47.46	43.718	43.149	47.806	34.173	36.695	53.483	65.462	81.459
723.5	36.481	42.674	41.087	34.363	30.244	48.731	46.665	53.149	50.185	57.034	56.149	61.789	56.293	46.06	43.902	46.163	45.449	54.917	44.669	50.117	43.674	43.948	40.635	47.679	43.951	43.582	48.13	34.334	36.968	53.8	65.267	81.287
724	36.675	42.772	41.339	34.527	30.475	49.184	46.985	53.353	50.332	57.403	56.506	62.299	56.534	46.277	44.038	46.29	45.498	55.149	44.73	50.285	43.729	44.201	40.724	48.011	44.183	43.903	48.324	34.566	37.218	54.158	65.482	81.419
724.5	36.855	42.771	41.518	34.689	30.717	49.652	47.276	53.447	50.448	57.693	56.894	62.647	56.837	46.622	44.182	46.365	45.584	55.527	44.769	50.446	43.784	44.425	40.616	48.331	44.43	44.239	48.484	34.718	37.343	54.585	65.62	81.685
725	36.905	42.946	41.606	34.826	30.915	50.054	47.585	53.605	50.696	57.934	57.126	62.788	57.016	46.809	44.332	46.604	45.806	55.885	44.907	50.719	43.937	44.627	40.636	48.658	44.704	44.582	48.797	34.743	37.441	54.903	65.708	82.214
725.5	37.026	43.301	41.735	35.003	31.129	50.458	47.956	53.757	50.88	58.086	57.324	62.891	57.125	46.813	44.481	46.845	45.84	56.232	45.048	51.15	44.055	44.77	40.696	48.79	44.882	44.856	49.095	34.679	37.552	55.091	65.793	82.631
726	37.19	43.668	41.897	35.201	31.302	50.872	48.3	53.93	51.083	58.386	57.553	63.067	57.331	46.828	44.569	47.061	45.835	56.567	45.196	51.336	44.25	45.088	40.947	48.905	45.142	45.128	49.319	34.754	37.72	55.586	66.143	82.924
726.5	37.443	43.931	42.128	35.504	31.505	51.213	48.577	54.065	51.289	58.828	57.896	63.298	57.645	47.048	44.758	47.172	45.845	56.934	45.236	51.522	44.558	45.525	41.068	49.123	45.416	45.537	49.505	34.879	37.87	56.325	66.672	83.318
727	37.67	44.2	42.211	35.612	31.606	51.473	48.789	54.166	51.55	59.127	58.148	63.452	57.84	47.359	44.994	47.42	45.919	57.197	45.273	51.758	44.858	45.988	41.047	49.379	45.687	46.053	49.727	34.962	38.006	56.831	66.979	83.621
727.5	37.811	44.421	42.285	35.68	31.658	51.73	49.061	54.331	51.779	59.191	58.427	63.531	57.767	47.52	45.096	47.674	46.018	57.426	45.411	52.145	45.04	46.254	41.106	49.667	45.908	46.471	49.924	34.997	38.11	56.946	67.098	83.829
728	37.897	44.563	42.45	35.719	31.686	52.167	49.464	54.469	51.908	59.159	58.714	63.672	57.847	47.426	45.063	47.896	46.168	57.597	45.623	52.495	45.057	46.422	41.249	49.848	46.033	46.832	50.14	35.104	38.196	56.792	66.897	83.507
728.5	37.92	44.676	42.719	36.067	31.75	52.569	49.854	54.677	51.987	59.301	58.867	63.844	57.998	47.258	45.147	47.927	46.382	57.836	45.762	52.762	45.103	46.598	41.425	50.034	46.252	47.102	50.377	35.243	38.285	56.687	66.688	83.492
729	37.983	44.803	42.925	36.37	31.869	52.914	50.184	54.728	52.017	59.414	58.753	63.942	58.116	47.202	45.393	47.985	46.49	58.028	45.796	52.877	45.129	46.84	41.509	50.143	46.52	47.313	50.539	35.405	38.402	56.95	66.613	83.457
729.5	38.075	44.994	42.971	36.559	31.962	53.254	50.444	54.934	52.092	59.528	58.714	64.156	58.189	47.398	45.54	48.052	46.541	58.218	45.874	52.939	45.224	47.168	41.606	50.279	46.834	47.487	50.631	35.562	38.509	57.56	67.2	83.715
730	38.183	45.189	42.976	36.486	32.082	53.686	50.704	55.029	52.227	59.609	58.798	64.415	58.305	47.565	45.51	48.042	46.435	58.319	46.03	53.127	45.32	47.405	41.662	50.365	46.97	47.79	50.656	35.642	38.573	58.212	67.903	83.938
730.5	38.278	45.456	43.027	36.454	32.162	53.957	50.937	55.185	52.395	59.835	58.945	64.63	58.439	47.626	45.538	48.077	46.369	58.557	46.169	53.413	45.457	47.712	41.729	50.574	47.063	48.17	50.763	35.726	38.75	58.133	68.312	84.397
731	38.444	45.522	43.204	36.531	32.315	54.151	51.183	55.289	52.536	59.952	59.026	64.854	58.615	47.602	45.648	48.157	46.27	58.84	46.211	53.694	45.516	47.964	41.876	50.876	47.195	48.441	50.953	35.801	38.924	57.751	68.095	84.759
731.5	38.586	45.536	43.34	36.631	32.54	54.422	51.439	55.424	52.5	60.088	59.21	65.205	58.817	47.604	45.625	48.291	46.252	59.131	46.29	53.901	45.634	48.179	42.068	51.145	47.373	48.551	51.065	35.89	39.016	57.76	67.909	85.139
732	38.707	45.546	43.51	36.641	32.788	54.79	51.65	55.483	52.439	60.173	59.598	65.581	59.036	47.654	45.632	48.393	46.267	59.292	46.394	54.06	45.8	48.282	42.351	51.351	47.629	48.727	51.248	35.922	39.075	58.244	67.709	85.447
732.5	38.745	45.642	43.55	36.66	32.768	55.074	51.74	55.45	52.484	60.354	59.944	65.767	59.049	47.703	45.551	48.426	46.318	59.512	46.569	54.244	45.996	48.432	42.478	51.491	47.783	48.976	51.395	36.079	39.2	58.807	68.217	85.704
733	38.664	45.792	43.66	36.803	32.684	55.197	51.771	55.607	52.697	60.479	60.198	65.933	59.13	47.753	45.566	48.45	46.31	59.567	46.687	54.38	46.039	48.628	42.44	51.573	47.876	49.334	51.529	36.196	39.384	59.452	68.942	85.82
733.5	38.657	45.916	43.815	37.132	32.68	55.325	51.852	55.829	52.806	60.605	60.276	66.109	59.256	47.769	45.606	48.523	46.358	59.712	46.852	54.583	46.125	48.795	42.353	51.629	47.931	49.62	51.554	36.27	39.485	59.893	69.18	85.802
734	38.753	46.024	44.042	37.411	32.849	55.535	52.063	56.038	52.827	60.742	60.324	66.165	59.393	47.809	45.705	48.578	46.34	59.789	46.887	54.698	46.245	48.969	42.353	51.717	47.968	49.849	51.591	36.254	39.561	59.937	68.973	86.028
734.5	38.961	46.195	44.287	37.586	33.093	55.852	52.395	56.187	52.966	60.878	60.466	66.101	59.456	47.634	45.639	48.471	46.244	60.144	46.96	54.943	46.373	49.165	42.45	51.849	48.098	50.037	51.759	36.218	39.624	59.505	68.698	86.174
735	38.976	46.395	44.362	37.68	33.21	56.09	52.774	56.176	53.135	60.91	60.552	66.125	59.506	47.541	45.537	48.34	46.156	60.399	46.951	55.063	46.471	49.522	42.48	51.987	48.292	50.242	51.848	36.218	39.687	59.266	68.884	86.512
735.5	38.972	46.584	44.347	37.799	33.235	56.267	52.955	56.123	53.303	60.869	60.583	66.135	59.45	47.66	45.58	48.315	46.176	60.628	47.048	55.253	46.54	49.764	42.515	52.084	48.475	50.432	52.057	36.302	39.71	59.168	69.052	86.341
736	39.079	46.629	44.298	37.893	33.215	56.395	53.03	56.098	53.399	60.877	60.522	66.174	59.404	47.903	45.681	48.414	46.211	60.704	47.132	55.452	46.639	49.884	42.588	52.227	48.57	50.618	52.196	36.503	39.827	59.051	69.3	86.507
736.5	39.198	46.687	44.305	37.916	33.251	56.588	53.143	56.189	53.433	61.018	60.678	66.358	59.561	47.873	45.608	48.522	46.122	60.858	47.295	55.686	46.747	49.939	42.742	52.358	48.679	50.764	52.398	36.614	39.912	58.9	69.361	86.499
737	39.321	46.685	44.451	37.908	33.293	56.847	53.348	56.385	53.39	61.044	60.752	66.556	59.762	47.664	45.534	48.623	46	61.086	47.385	55.899	46.928	50.035	42.882	52.413	48.792	50.938	52.394	36.671	39.922	59.021	69.204	86.643
737.5	39.334	46.699	44.628	37.959	33.402	57.146	53.512	56.449	53.305	61.156	60.931	66.647	59.922	47.566	45.569	48.573	45.983	61.321	47.417	55.969	47.015	50.178	42.954	52.427	48.805	51.146	52.441	36.651	39.873	59.505	69.329	86.746
738	39.349	46.71	44.685	38.012	33.378	57.312	53.592	56.456	53.299	61.418	61.081	66.773	60.014	47.566	45.631	48.44	45.96	61.461	47.437	55.937	46.974	50.201	42.951	52.518	48.784	51.403	52.473	36.616	39.908	59.965	69.735	86.904
738.5	39.349	46.799	44.563	38.001	33.291	57.454	53.685	56.557	53.491	61.6	61.214	66.883	60.057	47.492	45.547	48.326	45.954	61.429	47.45	55.995	46.898	50.26	42.982	52.668	48.919	51.594	52.579	36.633	39.913	60.231	70.192	86.988
739	39.384	47.006	44.541	37.956	33.313	57.615	53.776	56.769	53.741	61.511	61.101	66.827	59.949	47.426	45.483	48.39	45.896	61.362	47.37	56.077	46.873	50.424	42.959	52.713	49.107	51.859	52.794	36.699	39.926	60.501	70.021	86.942
739.5	39.423	47.235	44.779	37.976	33.462	57.84	53.928	56.939	53.906	61.331	61.093	66.732	59.895	47.292	45.366	48.462	45.941	61.323	47.3	56.215	46.981	50.594	42.959	52.784	49.253	52.056	52.844	36.763	39.975	60.937	69.693	87.012
740	39.512	47.377	45.139	38.06	33.695	57.924	54.023	56.919	53.814	61.358	61.225	66.74	59.928	47.32	45.37	48.488	45.982	61.512	47.357	56.251	47.109	50.707	43.021	52.849	49.381	52.12	52.791	36.79	40.127	60.908	69.504	86.703
740.5	39.595	47.424	45.326	38.125	33.756	58.021	54.175	56.833	53.705	61.544	61.389	66.822	60.11	47.352	45.302	48.383	45.964	61.715	47.553	56.351	47.149	50.71	43.138	52.911	49.487	52.015	52.704	36.842	40.335	60.668	69.294	86.035
741	39.524	47.484	45.293	38.281	33.707	58.173	54.274	56.841	53.735	61.801	61.494	66.977	60.271	47.388	45.244	48.369	45.825	61.911	47.804	56.509	47.273	50.832	43.195	52.933	49.605	51.949	52.778	36.954	40.53	60.555	69.263	85.808
741.5	39.483	47.651	45.157	38.437	33.612	58.354	54.349	56.94	53.919	61.921	61.604	67.239	60.399	47.342	45.102	48.392	45.664	62.039	48.016	56.671	47.288	50.977	43.133	52.879	49.617	52.015	52.903	37.022	40.618	60.84	69.271	86.16
742	39.629	47.788	45.049	38.533	33.703	58.484	54.353	57.087	54.102	61.953	61.629	67.466	60.372	47.31	45.029	48.387	45.542	62.127	48.029	56.749	47.287	51.066	43.035	52.791	49.599	52.171	53.037	37.046	40.544	61.196	69.343	86.519
742.5	39.798	47.856	45.013	38.526	33.787	58.518	54.448	57.117	54.177	61.929	61.589	67.577	60.436	47.195	44.924	48.253	45.439	62.164	47.963	56.754	47.231	51.043	42.992	52.777	49.536	52.328	53.168	37.043	40.49	61.514	69.485	86.905
743	39.85	47.894	45.118	38.51	33.871	58.551	54.53	57.153	54.287	62.14	61.696	67.735	60.624	47.047	44.821	48.137	45.357	62.219	47.966	56.842	47.301	51.165	43.151	52.993	49.654	52.434	53.238	37.128	40.538	61.504	69.779	87.178
743.5	39.906	47.873	45.353	38.528	33.922	58.686	54.709	57.172	54.389	62.185	61.968	67.917	60.7	46.983	44.807	48.023	45.27	62.359	48.094	57.035	47.433	51.362	43.336	53.308	49.832	52.587	53.275	37.214	40.702	61.393	69.987	87.689
744	39.998	47.806	45.408	38.532	33.972	58.817	54.967	57.172	54.365	62.16	62.062	67.947	60.661	46.959	44.841	47.984	45.262	62.315	48.134	57.157	47.579	51.606	43.47	53.543	50.017	52.622	53.228	37.229	40.748	61.045	69.979	87.726
744.5	40.032	47.724	45.346	38.623	34.038	58.924	55.196	57.173	54.23	62.061	62.048	67.821	60.625	46.861	44.887	47.89	45.158	62.27	48.122	57.22	47.782	51.779	43.406	53.482	49.982	52.553	53.118	37.122	40.661	61.189	70.412	87.804
745	39.997	47.852	45.265	38.74	34.172	59.123	55.259	57.265	54.191	62.142	62.138	67.793	60.695	46.767	44.859	47.798	45.103	62.203	48.129	57.218	47.714	51.863	43.403	53.334	49.885	52.426	52.967	37.07	40.586	61.382	70.834	87.713
745.5	39.855	47.964	45.311	38.832	34.208	59.377	55.233	57.356	54.215	62.229	62.287	67.816	60.742	46.804	44.74	47.7	45.053	62.307	48.174	57.148	47.496	51.776	43.294	53.222	49.778	52.558	52.998	37.139	40.656	61.548	70.647	87.561
746	39.655	47.873	45.193	38.744	34.092	59.401	55.183	57.419	54.228	62.301	62.402	67.809	60.627	46.863	44.648	47.569	45.125	62.444	48.209	57.109	47.363	51.587	43.256	53.292	49.86	52.817	53.065	37.262	40.745	61.59	70.14	87.414
746.5	39.637	47.714	45.083	38.587	33.988	59.189	55.121	57.436	54.314	62.293	62.439	67.703	60.535	46.803	44.587	47.579	45.071	62.617	48.238	57.208	47.5	51.639	43.312	53.459	50.02	52.953	53.044	37.301	40.754	61.486	69.969	87.371
747	39.9	47.696	45.1	38.55	33.989	59.056	55.14	57.462	54.37	62.217	62.461	67.703	60.443	46.639	44.577	47.616	44.928	62.759	48.308	57.541	47.547	51.862	43.373	53.52	50.08	52.892	52.943	37.287	40.762	61.173	70.197	87.674
747.5	40.107	47.951	45.257	38.687	33.966	59.054	55.107	57.527	54.408	62.046	62.29	67.654	60.436	46.468	44.524	47.646	44.73	62.781	48.271	57.615	47.447	52.22	43.437	53.526	50.089	52.786	52.803	37.301	40.764	60.974	70.511	87.903
748	40.137	48.162	45.343	38.86	33.966	59.19	55.159	57.706	54.445	61.873	62.125	67.594	60.424	46.49	44.563	47.616	44.648	62.767	48.224	57.558	47.417	52.28	43.47	53.51	50.044	52.831	52.778	37.372	40.831	61.5	70.923	88.444
748.5	40.084	48.293	45.419	38.952	34.039	59.38	55.275	57.698	54.42	61.895	62.104	67.554	60.443	46.49	44.475	47.498	44.523	62.784	48.226	57.591	47.687	52.252	43.503	53.643	49.993	52.88	52.967	37.405	40.892	61.84	71.102	88.541
749	40.083	48.347	45.554	38.992	34.221	59.54	55.38	57.568	54.406	62.233	62.271	67.762	60.529	46.459	44.394	47.463	44.473	62.921	48.333	57.744	47.947	52.211	43.482	53.725	50.044	52.887	53.142	37.402	40.935	62.1	70.834	88.427
749.5	40.01	48.327	45.594	38.92	34.334	59.531	55.473	57.406	54.503	62.471	62.419	68.025	60.627	46.277	44.355	47.429	44.428	63.141	48.407	57.834	48.041	52.257	43.392	53.674	50.232	52.87	53.205	37.437	40.988	62.052	70.454	88.309
750	39.992	48.223	45.43	38.923	34.383	59.39	55.489	57.5	54.588	62.411	62.319	68.153	60.699	46.146	44.224	47.376	44.289	63.294	48.509	57.81	48.084	52.384	43.328	53.67	50.347	52.849	53.022	37.461	41.06	62.075	70.608	88.49
750.5	40.079	48.089	45.355	38.949	34.305	59.451	55.527	57.544	54.57	62.222	62.23	68.054	60.713	46.063	44.091	47.258	44.193	63.39	48.606	57.862	48.044	52.459	43.218	53.808	50.301	52.805	52.927	37.525	41.125	61.779	70.809	88.359
751	40.183	47.996	45.489	39.022	34.26	59.623	55.452	57.539	54.542	62.245	62.317	68.029	60.758	46.001	43.941	47.136	44.152	63.357	48.732	57.882	47.991	52.45	43.238	53.897	50.266	52.802	52.922	37.591	41.143	61.419	70.792	88.29
751.5	40.168	47.997	45.693	39.168	34.266	59.868	55.36	57.441	54.641	62.358	62.525	68.053	60.853	45.893	43.919	47.098	44.206	63.225	48.743	57.897	47.886	52.404	43.257	53.759	50.246	52.752	52.931	37.656	41.191	61.075	70.691	88.325
752	40.053	48.028	45.721	39.279	34.405	59.975	55.32	57.397	54.702	62.411	62.632	68.112	60.929	45.794	43.865	46.985	44.157	63.176	48.799	57.949	47.984	52.336	43.293	53.599	50.152	52.76	52.907	37.626	41.221	61.309	71.058	88.399
752.5	40.092	48.135	45.605	39.308	34.397	59.928	55.385	57.281	54.569	62.489	62.567	68.21	60.902	45.794	43.771	46.952	44.111	63.386	48.912	58.107	48.181	52.435	43.333	53.607	50.095	52.751	52.826	37.606	41.175	61.996	70.947	88.048
753	40.172	48.222	45.388	39.247	34.366	59.812	55.448	57.304	54.413	62.522	62.458	68.348	60.84	45.676	43.65	46.81	43.901	63.593	49.018	58.18	48.224	52.523	43.423	53.785	50.161	52.749	52.789	37.562	41.127	62.64	70.851	87.771
753.5	40.216	48.354	45.347	39.249	34.309	59.941	55.463	57.347	54.291	62.487	62.296	68.312	60.744	45.559	43.584	46.612	43.731	63.639	49.022	58.286	48.125	52.672	43.484	53.85	50.273	52.791	52.676	37.56	41.107	62.431	70.771	87.999
754	40.164	48.332	45.417	39.132	34.283	60.092	55.532	57.477	54.329	62.392	62.221	68.159	60.702	45.489	43.57	46.413	43.662	63.592	48.967	58.291	48.042	52.707	43.527	53.882	50.374	52.911	52.619	37.657	41.113	61.873	71.248	88.59
754.5	40.082	48.342	45.509	39.022	34.242	60.093	55.634	57.551	54.356	62.372	62.344	68.106	60.747	45.447	43.513	46.38	43.725	63.563	48.92	58.287	48.075	52.752	43.639	53.905	50.47	53.07	52.669	37.79	41.063	61.487	71.073	88.748
755	40.028	48.342	45.572	39.026	34.148	59.935	55.655	57.552	54.287	62.405	62.608	68.227	60.836	45.322	43.423	46.417	43.654	63.414	48.912	58.171	48.089	52.803	43.715	53.875	50.603	53.135	52.82	37.916	41.139	61.866	70.967	88.872
755.5	39.962	48.522	45.557	39.159	34.182	59.859	55.565	57.666	54.314	62.451	62.779	68.291	60.934	45.33	43.458	46.521	43.593	63.337	48.898	58.094	48.004	52.764	43.63	53.889	50.647	53.237	52.9	37.948	41.21	62.135	70.68	88.809
756	40.124	48.655	45.568	39.337	34.329	59.924	55.585	57.724	54.437	62.504	62.595	68.23	60.922	45.309	43.52	46.474	43.519	63.393	49.009	58.109	47.954	52.668	43.43	53.887	50.622	53.245	52.944	37.931	41.281	62.064	70.56	88.686
756.5	40.248	48.641	45.625	39.4	34.524	59.977	55.609	57.681	54.494	62.51	62.277	68.237	60.918	45.192	43.493	46.34	43.415	63.545	49.01	58.217	48.049	52.755	43.319	53.937	50.571	53.06	52.828	37.843	41.243	61.894	70.285	88.03
757	40.273	48.541	45.684	39.369	34.567	59.993	55.681	57.555	54.549	62.436	62.11	68.184	60.835	45.024	43.245	46.182	43.287	63.609	48.889	58.094	48.126	52.897	43.385	53.985	50.575	52.916	52.695	37.764	41.277	62.16	70.136	87.837
757.5	40.238	48.428	45.703	39.364	34.488	59.996	55.785	57.524	54.712	62.463	62.177	68.173	60.852	45.026	43.039	46.213	43.302	63.563	48.744	57.967	48.035	52.953	43.487	54.117	50.55	52.973	52.672	37.77	41.296	62.32	70.109	88.347
758	40.276	48.524	45.704	39.442	34.386	60.074	55.923	57.451	54.818	62.594	62.42	68.221	60.947	45.016	42.888	46.164	43.304	63.44	48.827	57.843	47.979	52.879	43.586	54.242	50.583	53.108	52.761	37.851	41.291	62.204	70.321	88.87
758.5	40.3	48.631	45.705	39.54	34.324	60.134	55.963	57.385	54.875	62.649	62.577	68.494	61.118	44.944	42.819	46.082	43.103	63.431	48.992	58.024	48.028	52.975	43.611	54.217	50.583	53.209	52.8	37.965	41.375	61.589	70.385	88.422
759	40.258	48.743	45.664	39.403	34.282	60.282	56.031	57.518	54.832	62.534	62.525	68.54	61.051	44.936	42.873	45.962	42.975	63.453	49.076	58.233	48.152	53.18	43.582	54.186	50.632	53.148	52.76	37.992	41.414	61.458	70.832	88.131
759.5	40.264	48.756	45.583	39.369	34.338	60.451	56.161	57.563	54.756	62.446	62.355	68.307	60.793	45.027	42.912	45.907	43.004	63.442	48.955	58.324	48.128	53.348	43.584	54.176	50.678	53.007	52.73	38.022	41.458	61.586	71.067	88.233
760	40.307	48.714	45.639	39.388	34.416	60.642	56.205	57.551	54.733	62.463	62.375	68.083	60.688	44.895	42.765	45.825	43.001	63.486	48.882	58.305	48.142	53.102	43.558	54.154	50.641	52.906	52.683	38.045	41.42	61.951	70.929	88.478
760.5	40.222	48.56	45.652	39.346	34.347	60.684	56.17	57.574	54.873	62.604	62.504	68.031	60.802	44.72	42.52	45.715	42.864	63.492	48.888	58.24	48.144	52.859	43.566	54.094	50.532	53.108	52.738	38.108	41.465	61.923	70.743	88.699
761	40.243	48.55	45.796	39.308	34.301	60.539	56.093	57.676	54.946	62.705	62.601	68.115	60.889	44.583	42.436	45.657	42.676	63.601	48.965	58.318	48.252	52.636	43.548	54.087	50.418	53.272	52.739	38.139	41.49	62.192	70.738	88.625
761.5	40.256	48.681	45.972	39.4	34.337	60.24	56.09	57.719	54.877	62.658	62.524	68.132	60.84	44.597	42.47	45.639	42.609	63.672	49.041	58.314	48.225	52.678	43.514	53.999	50.411	53.221	52.674	38.104	41.464	62	71.294	88.676
762	40.174	48.649	46.056	39.498	34.382	60.235	56.119	57.659	54.862	62.473	62.466	68.082	60.728	44.478	42.424	45.555	42.558	63.867	49.137	58.437	48.282	52.749	43.443	53.993	50.557	52.964	52.488	38.043	41.335	62.282	71.403	88.53
762.5	40.1	48.532	46.069	39.444	34.346	60.274	56.053	57.596	54.841	62.328	62.44	68.019	60.726	44.39	42.287	45.462	42.527	63.725	49.088	58.53	48.279	52.994	43.378	53.943	50.702	52.964	52.453	37.933	41.273	62.637	71.425	88.568
763	40.101	48.45	46.046	39.401	34.205	60.352	56.002	57.651	54.819	62.337	62.418	68.113	60.705	44.239	42.213	45.397	42.443	63.478	48.951	58.535	48.339	53.158	43.355	53.933	50.833	53.111	52.444	37.948	41.373	63.023	71.333	88.776
763.5	40.202	48.418	45.956	39.492	34.125	60.348	55.993	57.768	54.809	62.492	62.401	68.353	60.784	44.209	42.241	45.418	42.422	63.497	48.947	58.509	48.302	53.188	43.339	53.877	50.731	53.023	52.455	38.034	41.516	62.596	71.406	89.022
764	40.22	48.3	45.703	39.504	34.164	60.341	56.017	57.856	54.803	62.671	62.465	68.535	60.839	44.227	42.333	45.427	42.478	63.832	49.066	58.556	48.334	53.148	43.404	53.86	50.658	52.763	52.479	38.103	41.49	62.272	71.589	89.401
764.5	40.258	48.355	45.69	39.505	34.381	60.284	56.021	57.856	54.751	62.649	62.48	68.419	60.834	44.299	42.333	45.473	42.596	64.186	49.169	58.616	48.399	53.057	43.51	53.904	50.586	52.571	52.432	38.095	41.401	62.094	71.827	89.712
765	40.375	48.493	45.879	39.389	34.529	60.371	56.086	57.953	54.697	62.567	62.476	68.353	60.698	44.249	42.241	45.397	42.546	64.236	49.237	58.685	48.445	52.991	43.565	53.977	50.696	52.586	52.396	38.131	41.33	62.108	71.778	89.614
765.5	40.441	48.579	45.889	39.329	34.5	60.593	56.154	57.966	54.675	62.504	62.492	68.386	60.665	44.178	42.138	45.273	42.447	63.976	49.133	58.496	48.358	52.96	43.456	53.998	50.646	52.684	52.389	38.155	41.369	62.137	71.389	89.303
766	40.451	48.641	45.81	39.319	34.44	60.718	56.178	57.845	54.661	62.693	62.678	68.404	60.708	44.107	42.063	45.073	42.293	63.761	49.124	58.381	48.283	52.963	43.342	53.926	50.562	52.73	52.358	38.053	41.316	61.881	71.083	89.029
766.5	40.364	48.649	45.745	39.331	34.427	60.708	56.228	57.712	54.698	62.81	62.854	68.281	60.762	44.032	42.011	44.943	42.209	63.742	49.236	58.405	48.274	53.01	43.308	53.913	50.484	52.796	52.293	37.993	41.328	61.309	71.37	89.239
767	40.309	48.637	45.795	39.373	34.464	60.681	56.349	57.741	54.72	62.693	62.864	68.133	60.722	43.911	42.024	44.982	42.168	63.74	49.287	58.499	48.277	53.031	43.369	54.041	50.551	52.782	52.138	38.06	41.373	61.137	71.42	89.394
767.5	40.213	48.553	45.726	39.249	34.422	60.608	56.431	57.929	54.744	62.45	62.611	68.019	60.638	43.799	42.071	45.053	42.257	63.783	49.17	58.467	48.272	53.089	43.389	54.12	50.584	52.639	52.103	38.234	41.447	61.677	70.863	89.067
768	40.224	48.444	45.718	39.281	34.412	60.527	56.404	58.044	54.757	62.332	62.416	68.039	60.641	43.677	42.016	45.038	42.285	63.987	49.068	58.352	48.212	53.214	43.51	54.111	50.561	52.588	52.156	38.243	41.417	62.382	70.443	88.56
768.5	40.237	48.282	45.654	39.271	34.39	60.51	56.344	58.045	54.87	62.394	62.463	68.026	60.691	43.666	41.792	45.004	42.304	64.01	48.977	58.273	48.102	53.294	43.637	53.978	50.527	52.647	52.275	38.177	41.407	62.768	70.672	88.348
769	40.303	48.327	45.764	39.294	34.549	60.4	56.233	57.876	54.948	62.569	62.697	68.127	60.74	43.687	41.77	45.002	42.208	63.803	48.95	58.284	48.033	53.304	43.697	53.914	50.561	52.66	52.256	38.094	41.478	62.909	70.735	88.464
769.5	40.215	48.48	45.888	39.242	34.566	60.324	56.225	57.744	54.807	62.779	62.788	68.292	60.715	43.616	41.799	44.951	42.169	63.568	49.026	58.271	48.024	53.318	43.517	53.833	50.507	52.527	52.138	38.129	41.539	62.817	70.879	88.711
770	40.165	48.641	46.017	39.18	34.51	60.312	56.18	57.694	54.581	62.794	62.687	68.351	60.662	43.564	41.781	44.851	42.178	63.613	49.235	58.279	48.112	53.333	43.345	53.837	50.497	52.481	52.032	38.222	41.548	62.793	71.183	88.916
770.5	40.147	48.789	46	39.096	34.457	60.456	56.158	57.712	54.365	62.644	62.452	68.157	60.592	43.609	41.759	44.785	42.164	63.847	49.443	58.312	48.247	53.401	43.293	53.808	50.581	52.527	52.009	38.293	41.521	62.559	71.567	88.751
771	40.252	48.839	45.924	39.076	34.538	60.634	56.162	57.725	54.363	62.507	62.296	67.963	60.504	43.643	41.697	44.707	42.002	64.027	49.512	58.368	48.372	53.338	43.376	53.76	50.676	52.548	52.077	38.34	41.455	62.443	71.62	88.489
771.5	40.362	48.829	45.918	39.318	34.664	60.727	56.262	57.752	54.547	62.616	62.409	68.047	60.482	43.481	41.643	44.624	41.795	64.212	49.393	58.357	48.372	53.18	43.378	53.737	50.583	52.589	52.174	38.243	41.394	62.777	71.624	88.59
772	40.494	48.783	46.138	39.606	34.72	60.743	56.412	57.796	54.721	62.696	62.59	68.125	60.597	43.448	41.588	44.614	41.76	64.212	49.313	58.373	48.406	53.002	43.38	53.861	50.601	52.743	52.224	38.16	41.359	63.133	71.472	88.918
772.5	40.456	48.655	46.311	39.727	34.634	60.696	56.415	57.89	54.641	62.633	62.57	68.191	60.809	43.416	41.618	44.62	41.877	64.063	49.289	58.491	48.423	53.092	43.337	53.975	50.678	52.811	52.198	38.176	41.456	63.178	71.195	88.865
773	40.3	48.625	46.419	39.611	34.521	60.725	56.368	58.037	54.584	62.556	62.504	68.193	60.987	43.346	41.515	44.609	41.721	63.888	49.329	58.622	48.391	53.173	43.313	53.977	50.715	52.72	52.109	38.286	41.545	62.57	71.1	89.048
773.5	40.132	48.71	46.275	39.461	34.534	60.698	56.354	58.067	54.711	62.512	62.552	68.155	60.989	43.22	41.406	44.533	41.491	63.759	49.378	58.578	48.34	53.156	43.234	53.873	50.588	52.549	51.917	38.398	41.585	62.35	71.248	89.452
774	40.133	48.819	46.167	39.442	34.585	60.631	56.355	58.076	54.94	62.535	62.665	68.088	60.88	43.21	41.379	44.497	41.385	63.77	49.476	58.372	48.483	52.9	43.3	53.816	50.472	52.536	51.828	38.42	41.555	62.505	71.186	89.459
774.5	40.192	48.777	46.075	39.462	34.619	60.576	56.365	57.965	54.978	62.525	62.553	68.053	60.781	43.255	41.404	44.418	41.432	63.863	49.559	58.29	48.642	52.865	43.456	53.818	50.424	52.636	51.844	38.43	41.564	62.795	70.887	89.205
775	40.323	48.648	46.075	39.351	34.616	60.514	56.293	57.85	54.777	62.597	62.403	68.165	60.763	43.318	41.379	44.391	41.512	63.865	49.432	58.301	48.611	52.918	43.64	53.923	50.56	52.674	51.957	38.453	41.727	62.655	70.918	88.936
775.5	40.357	48.556	46.029	39.19	34.5	60.55	56.317	57.981	54.643	62.454	62.208	68.138	60.607	43.35	41.348	44.407	41.498	63.763	49.308	58.473	48.38	53.133	43.61	53.896	50.658	52.649	52.109	38.494	41.845	62.471	71.089	89.318
776	40.523	48.592	46.189	39.393	34.524	60.589	56.193	58.053	54.76	62.296	62.167	67.909	60.422	43.251	41.363	44.475	41.38	63.609	49.296	58.511	48.249	53.218	43.481	53.865	50.703	52.573	52.214	38.508	41.83	62.218	71.051	89.494
776.5	40.596	48.706	46.293	39.551	34.534	60.685	56.222	57.965	54.88	62.229	62.132	67.745	60.523	43.166	41.338	44.446	41.296	63.705	49.459	58.718	48.32	53.357	43.401	53.766	50.683	52.565	52.208	38.472	41.802	62.185	71.253	89.786
777	40.715	48.818	46.259	39.455	34.576	60.713	56.167	57.819	54.869	62.242	62.207	67.695	60.693	43.084	41.313	44.405	41.237	63.921	49.519	58.898	48.486	53.343	43.367	53.755	50.678	52.44	52.106	38.462	41.828	62.137	71.726	89.706
777.5	40.766	48.964	46.237	39.299	34.584	60.727	56.051	57.939	54.821	62.292	62.29	67.698	60.685	43.073	41.339	44.325	41.319	64.025	49.493	58.922	48.494	53.328	43.364	53.827	50.601	52.294	51.996	38.437	41.822	62.105	71.786	89.651
778	40.692	49.077	46.286	39.297	34.609	60.663	56.026	58.048	54.827	62.465	62.266	67.777	60.593	43.12	41.287	44.235	41.397	63.973	49.481	58.688	48.407	53.38	43.42	54.006	50.665	52.254	51.859	38.384	41.671	62.259	71.593	89.51
778.5	40.496	49.111	46.301	39.323	34.556	60.494	56.044	58.067	54.827	62.58	62.22	68.042	60.625	43.221	41.258	44.111	41.466	63.715	49.378	58.434	48.254	53.43	43.47	54.031	50.711	52.278	51.726	38.368	41.547	62.538	71.465	89.228
779	40.329	48.989	46.231	39.459	34.561	60.186	56.016	57.92	54.8	62.499	62.201	68.283	60.769	43.286	41.228	44.154	41.41	63.609	49.39	58.352	48.197	53.384	43.458	53.97	50.685	52.283	51.635	38.413	41.444	62.619	71.391	89.248
779.5	40.255	48.884	46.21	39.594	34.573	59.956	55.876	57.894	54.77	62.364	62.267	68.395	60.714	43.319	41.229	44.227	41.396	63.812	49.439	58.426	48.26	53.317	43.378	53.949	50.58	52.229	51.645	38.349	41.421	62.182	71.217	89.3
780	40.303	48.756	46.165	39.59	34.577	60.132	55.924	57.842	54.721	62.548	62.472	68.603	60.769	43.157	41.129	44.092	41.341	64.12	49.58	58.537	48.377	53.36	43.384	53.985	50.632	52.114	51.706	38.28	41.588	61.883	71.398	89.346
780.5	40.417	48.624	46.094	39.435	34.483	60.343	56.029	57.905	54.736	62.8	62.542	68.618	60.891	42.986	41.052	43.949	41.319	64.184	49.561	58.726	48.41	53.365	43.441	53.934	50.66	52.057	51.726	38.308	41.774	61.862	71.762	89.307
781	40.506	48.548	45.944	39.23	34.379	60.493	56.173	57.901	54.698	62.795	62.528	68.561	61.02	42.876	41.002	43.909	41.241	64.108	49.461	58.842	48.487	53.32	43.45	53.982	50.623	52.053	51.737	38.495	41.927	62.17	71.62	89.025
781.5	40.481	48.539	45.911	39.2	34.453	60.623	56.254	57.972	54.862	62.678	62.51	68.384	60.905	42.887	40.928	43.959	41.191	64.087	49.387	58.84	48.457	53.312	43.483	54.136	50.573	52.089	51.635	38.588	41.906	62.262	71.107	88.87
782	40.411	48.753	46.006	39.38	34.596	60.804	56.317	57.995	54.943	62.66	62.434	68.331	60.748	42.831	40.882	43.919	41.106	64.15	49.454	58.749	48.429	53.377	43.368	54.177	50.512	52.065	51.57	38.561	41.803	62.285	70.8	88.713
782.5	40.33	48.946	46.105	39.609	34.672	60.839	56.298	57.929	55.051	62.755	62.405	68.339	60.668	42.813	40.877	43.912	41.012	64.263	49.417	58.651	48.352	53.421	43.207	54.02	50.49	52.044	51.58	38.491	41.649	62.491	71.177	89.234
783	40.288	49.002	46.145	39.615	34.601	60.677	56.184	57.799	54.995	62.773	62.409	68.323	60.692	42.836	40.958	43.907	40.929	64.199	49.362	58.536	48.313	53.493	43.028	53.852	50.47	52.081	51.565	38.499	41.621	62.153	71.575	89.546
783.5	40.416	48.858	46.24	39.477	34.568	60.552	56.101	57.741	54.892	62.575	62.438	68.092	60.691	42.823	40.98	44.003	40.967	64.144	49.436	58.604	48.326	53.449	43.049	53.854	50.434	52.175	51.49	38.457	41.666	61.92	71.505	89.722
784	40.447	48.629	46.166	39.349	34.502	60.517	56.042	57.777	54.723	62.384	62.484	68.014	60.691	42.724	40.947	43.94	41.063	64.078	49.526	58.666	48.551	53.402	43.137	53.922	50.376	52.236	51.48	38.403	41.605	62.374	71.043	89.415
784.5	40.465	48.549	46.045	39.325	34.439	60.601	56.105	57.86	54.739	62.369	62.731	68.264	60.705	42.553	40.859	43.777	41.027	64.079	49.557	58.699	48.653	53.403	43.207	53.902	50.316	52.18	51.448	38.468	41.54	62.773	70.822	89.316
785	40.418	48.523	46.023	39.262	34.335	60.695	56.076	57.824	54.81	62.422	62.898	68.276	60.809	42.573	40.865	43.744	40.966	63.899	49.558	58.7	48.57	53.339	43.277	53.808	50.39	52.016	51.335	38.584	41.604	62.787	71.013	89.627
785.5	40.443	48.589	46.257	39.317	34.333	60.791	56.024	57.862	54.811	62.525	62.811	68.105	60.819	42.649	40.923	43.863	40.958	63.787	49.572	58.716	48.405	53.293	43.279	53.709	50.423	51.922	51.441	38.624	41.722	62.801	71.257	89.594
786	40.362	48.701	46.352	39.301	34.408	60.77	55.978	57.89	54.794	62.631	62.633	68.124	60.799	42.63	40.894	43.893	40.918	63.775	49.526	58.717	48.332	53.391	43.261	53.774	50.511	51.932	51.652	38.682	41.832	62.871	71.326	89.699
786.5	40.266	48.827	46.324	39.269	34.496	60.699	56.085	58.013	54.761	62.785	62.598	68.259	60.782	42.537	40.768	43.764	40.813	63.924	49.581	58.759	48.346	53.337	43.253	53.941	50.592	51.929	51.77	38.754	41.78	62.461	71.034	89.67
787	40.26	48.801	46.361	39.262	34.594	60.596	56.267	57.967	54.755	62.852	62.578	68.282	60.816	42.548	40.693	43.71	40.81	64.058	49.659	58.812	48.378	53.207	43.247	54.106	50.667	51.883	51.71	38.766	41.725	61.995	70.726	89.634
787.5	40.264	48.642	46.589	39.315	34.6	60.543	56.294	57.976	54.791	62.858	62.564	68.372	60.858	42.642	40.742	43.818	40.913	64.223	49.754	58.839	48.418	53.23	43.286	54.127	50.593	51.919	51.573	38.774	41.728	62.294	70.575	89.358
788	40.175	48.555	46.701	39.225	34.471	60.484	56.146	57.935	54.755	62.981	62.608	68.519	61.019	42.619	40.75	43.859	40.997	64.313	49.738	58.8	48.453	53.289	43.358	54.124	50.462	52.091	51.486	38.847	41.795	62.765	70.663	89.198
788.5	40.154	48.739	46.617	39.182	34.38	60.537	55.981	57.957	54.637	62.882	62.651	68.569	61.035	42.49	40.671	43.713	40.987	64.241	49.752	58.725	48.394	53.242	43.517	54.017	50.485	52.193	51.502	38.942	41.924	62.854	70.876	89.22
789	40.281	48.926	46.577	39.219	34.424	60.581	55.96	57.829	54.532	62.777	62.626	68.33	60.89	42.321	40.569	43.495	40.913	64.098	49.734	58.597	48.425	53.208	43.496	54.038	50.625	52.135	51.635	39.003	42.024	62.701	71.253	89.066
789.5	40.403	48.952	46.61	39.385	34.465	60.696	56.109	57.602	54.433	62.763	62.617	68.029	60.645	42.337	40.503	43.36	40.783	64.143	49.648	58.48	48.47	53.361	43.507	54.136	50.767	52.024	51.643	38.909	41.968	62.911	71.528	88.624
790	40.486	48.719	46.593	39.441	34.471	60.799	56.291	57.536	54.374	62.717	62.554	67.944	60.553	42.406	40.426	43.362	40.671	64.226	49.442	58.486	48.584	53.355	43.369	54.09	50.66	52.056	51.608	38.763	41.769	62.983	71.608	88.781
790.5	40.618	48.657	46.59	39.509	34.516	60.764	56.17	57.536	54.37	62.682	62.472	68.014	60.585	42.41	40.472	43.422	40.585	64.061	49.25	58.483	48.485	53.336	43.243	53.945	50.508	52.107	51.557	38.63	41.706	62.587	71.636	89.12
791	40.69	48.836	46.626	39.532	34.509	60.728	56.024	57.575	54.505	62.595	62.454	68.147	60.452	42.383	40.578	43.491	40.583	63.78	49.167	58.416	48.289	53.3	43.209	53.72	50.336	52.173	51.489	38.702	41.82	62.361	71.578	89.177
791.5	40.577	49.01	46.691	39.498	34.488	60.738	56.041	57.708	54.82	62.588	62.439	68.177	60.422	42.428	40.573	43.467	40.588	63.802	49.291	58.509	48.283	53.337	43.293	53.672	50.25	52.162	51.434	38.791	41.855	62.268	71.417	88.804
792	40.505	48.848	46.643	39.321	34.481	60.808	56.183	57.905	55.024	62.518	62.409	68.282	60.573	42.444	40.398	43.433	40.639	64.068	49.491	58.775	48.424	53.282	43.396	53.81	50.39	52.05	51.425	38.792	41.779	61.979	71.574	88.983
792.5	40.645	48.716	46.655	39.294	34.649	60.783	56.221	57.992	55.045	62.565	62.472	68.364	60.734	42.351	40.337	43.441	40.63	64.239	49.721	58.78	48.536	53.324	43.414	54.102	50.617	51.982	51.414	38.727	41.721	61.785	71.658	89.685
793	40.747	48.752	46.692	39.297	34.649	60.649	56.193	57.939	55	62.701	62.548	68.344	60.761	42.176	40.434	43.458	40.661	64.2	49.795	58.642	48.548	53.461	43.517	54.368	50.729	51.914	51.373	38.763	41.8	62.005	71.717	90.228
793.5	40.696	48.986	46.836	39.294	34.579	60.567	56.138	57.95	55.015	62.947	62.53	68.427	60.829	42.137	40.4	43.356	40.669	64.243	49.737	58.562	48.522	53.487	43.605	54.347	50.685	51.825	51.266	38.872	41.858	62.136	71.878	89.998
794	40.636	49.06	46.835	39.349	34.568	60.472	56.048	57.965	54.889	62.882	62.392	68.268	60.764	42.145	40.27	43.229	40.686	64.353	49.732	58.719	48.454	53.395	43.656	54.098	50.533	51.636	51.136	38.972	41.978	62.074	72.123	89.505
794.5	40.681	49.171	46.731	39.395	34.662	60.466	55.895	58.056	54.823	62.73	62.269	67.939	60.581	42.154	40.201	43.214	40.636	64.385	49.858	58.811	48.363	53.429	43.503	53.961	50.499	51.584	51.126	38.974	42.011	62.008	72.105	89.545
795	40.682	49.134	46.505	39.38	34.574	60.629	55.838	58.179	54.925	62.587	62.216	67.678	60.485	42.189	40.287	43.224	40.532	64.417	49.943	58.942	48.398	53.463	43.338	53.917	50.587	51.59	51.208	38.952	42.039	62.267	72.014	90.193
795.5	40.634	48.981	46.339	39.407	34.475	60.885	55.966	58.228	55.008	62.497	62.336	67.742	60.543	42.256	40.246	43.138	40.459	64.493	49.997	58.912	48.408	53.504	43.301	53.773	50.746	51.534	51.185	38.849	41.964	62.445	71.569	90.066
796	40.644	48.874	46.253	39.458	34.484	61.06	56.131	58.209	54.982	62.602	62.549	67.949	60.559	42.204	40.222	43.058	40.404	64.562	50.07	58.794	48.416	53.51	43.325	53.63	50.707	51.47	51.128	38.783	41.962	62.458	70.927	89.25
796.5	40.634	48.974	46.321	39.483	34.582	61.085	56.271	58.147	54.965	62.603	62.63	68.037	60.487	42.138	40.3	43.092	40.466	64.459	50.116	58.694	48.458	53.437	43.316	53.691	50.704	51.642	51.155	38.729	41.956	62.475	71.022	88.697
797	40.445	49.028	46.482	39.38	34.605	61.031	56.272	57.985	54.902	62.573	62.683	68.063	60.55	42.097	40.414	43.242	40.543	64.348	50.099	58.844	48.525	53.336	43.225	53.777	50.669	51.763	51.149	38.697	41.946	62.384	71.474	88.716
797.5	40.313	48.942	46.541	39.353	34.562	60.923	56.233	57.797	54.727	62.435	62.676	68.076	60.708	42.074	40.345	43.352	40.506	64.23	50.051	59.077	48.556	53.43	43.249	53.828	50.579	51.783	51.061	38.679	41.892	62.444	71.667	88.808
798	40.324	48.934	46.482	39.253	34.551	60.835	56.173	57.77	54.7	62.489	62.521	68.138	60.694	42.097	40.188	43.379	40.4	64.194	49.987	59.066	48.605	53.547	43.322	53.786	50.465	51.792	51.029	38.727	41.892	62.494	71.51	88.921
798.5	40.393	48.989	46.386	39.17	34.419	60.769	56.091	57.895	54.765	62.466	62.301	68.117	60.544	42.101	40.072	43.379	40.343	64.144	50.017	58.92	48.622	53.575	43.381	53.724	50.443	51.904	51.196	38.804	41.912	62.562	71.321	88.853
799	40.254	48.787	46.339	39.056	34.266	60.695	56.039	57.978	54.883	62.393	62.243	68.043	60.492	42.005	40.17	43.289	40.398	64.111	49.993	58.772	48.363	53.448	43.289	53.683	50.515	51.829	51.246	38.785	41.861	62.754	70.752	88.603
799.5	40.451	48.811	46.408	39.186	34.398	60.634	56.023	58.016	54.864	62.389	62.509	68.165	60.623	41.944	40.291	43.174	40.466	64.172	49.946	58.891	48.186	53.547	43.18	53.778	50.441	51.757	51.199	38.776	41.832	63.016	70.745	88.622
800	40.582	48.851	46.417	39.195	34.525	60.667	56.062	57.899	54.919	62.579	62.632	68.24	60.632	41.919	40.279	43.077	40.459	64.434	49.998	59.002	48.4	53.657	43.245	53.975	50.491	51.804	51.127	38.814	41.874	63.215	71.22	88.911
800.5	40.677	49.053	46.516	39.259	34.513	60.745	56.111	57.801	54.949	62.462	62.496	68.079	60.439	41.824	40.035	43.039	40.329	64.55	50	59.019	48.536	53.642	43.395	54.116	50.544	51.773	51.074	38.831	41.961	63.257	71.727	88.964
801	40.475	48.89	46.403	39.16	34.337	60.829	56.173	57.725	54.915	62.335	62.355	67.956	60.271	41.724	39.853	43.037	40.228	64.62	50.021	59.013	48.582	53.536	43.511	54.029	50.596	51.696	50.982	38.921	42.089	63.237	71.8	89.065
801.5	40.427	48.882	46.3	39.086	34.218	60.746	56.196	57.79	54.928	62.444	62.356	67.985	60.269	41.74	39.789	43.039	40.195	64.546	50.036	58.948	48.543	53.568	43.395	53.832	50.549	51.691	50.856	39.027	42.153	63.188	71.878	89.147
802	40.329	48.852	46.121	39.071	34.177	60.677	56.24	57.958	55.173	62.582	62.285	67.978	60.328	41.764	39.824	43.059	40.136	64.476	50.14	58.863	48.538	53.654	43.114	53.65	50.55	51.663	50.79	39.106	42.122	63.169	71.943	88.955
802.5	40.378	49.008	46.202	39.264	34.367	60.612	56.199	58.167	55.388	62.483	62.205	67.991	60.328	41.74	39.841	43.045	40.032	64.441	50.279	58.965	48.518	53.698	43.011	53.729	50.602	51.557	50.932	39.02	41.944	62.952	72.079	88.866
803	40.407	49.021	46.422	39.408	34.565	60.586	56.069	58.162	55.293	62.46	62.276	68.111	60.419	41.797	39.763	42.93	40.071	64.466	50.283	59.109	48.578	53.721	43.016	53.832	50.683	51.509	51.133	39.002	41.79	62.988	72.025	89.029
803.5	40.448	48.862	46.693	39.445	34.673	60.582	55.92	58.048	55.098	62.463	62.399	68.304	60.486	41.867	39.636	42.809	40.179	64.527	50.124	59.083	48.579	53.675	43.047	53.915	50.695	51.55	51.104	39.057	41.793	62.9	71.861	89.161
804	40.361	48.81	46.805	39.461	34.684	60.547	55.762	57.881	54.939	62.513	62.368	68.399	60.568	41.807	39.576	42.634	40.099	64.592	50.16	59.021	48.61	53.595	43.055	53.886	50.613	51.592	50.981	39.134	41.96	63.338	71.656	89.714
804.5	40.346	48.757	46.701	39.433	34.608	60.533	55.663	57.785	54.92	62.671	62.246	68.36	60.65	41.74	39.654	42.608	39.948	64.613	50.26	58.951	48.648	53.561	43.225	53.897	50.538	51.621	50.914	39.121	42.029	63.186	71.239	89.713
805	40.453	48.767	46.666	39.536	34.515	60.516	55.656	57.715	54.867	62.859	62.375	68.274	60.728	41.717	39.748	42.683	39.923	64.423	50.189	58.878	48.699	53.521	43.384	53.786	50.496	51.603	50.993	38.968	41.91	63.015	70.885	89.433
805.5	40.51	48.761	46.643	39.515	34.508	60.553	55.761	57.77	54.878	62.685	62.39	68.124	60.656	41.609	39.758	42.709	40.039	64.189	49.925	58.684	48.582	53.414	43.349	53.733	50.412	51.51	51.063	38.818	41.709	62.491	70.68	88.934
806	40.385	48.775	46.562	39.265	34.389	60.585	55.913	57.705	54.835	62.461	62.17	67.963	60.487	41.437	39.746	42.62	40.019	64.257	49.828	58.625	48.467	53.333	43.257	53.698	50.366	51.518	51.153	38.707	41.586	62.32	70.345	88.482
806.5	40.33	48.676	46.45	39.068	34.226	60.639	56.009	57.819	54.894	62.342	62.114	67.754	60.341	41.371	39.665	42.437	39.875	64.417	49.904	58.709	48.551	53.194	43.249	53.785	50.429	51.511	51.094	38.689	41.464	61.968	70.341	88.573
807	40.538	48.647	46.475	39.188	34.221	60.643	55.929	57.878	54.916	62.413	62.326	67.901	60.377	41.433	39.667	42.366	39.806	64.54	50.058	58.843	48.67	53.181	43.321	53.796	50.436	51.573	50.94	38.805	41.47	61.761	70.753	89.22
807.5	40.673	48.756	46.496	39.239	34.332	60.509	55.803	58.082	55.037	62.338	62.375	68.153	60.519	41.47	39.663	42.342	39.782	64.701	50.163	58.902	48.641	53.186	43.239	53.709	50.292	51.438	50.756	38.979	41.626	61.999	71.219	89.966
808	40.69	48.999	46.533	39.247	34.404	60.461	55.925	58.163	54.964	62.133	62.208	68.046	60.375	41.464	39.518	42.382	39.814	64.693	50.297	58.899	48.519	53.165	43.28	53.637	50.245	51.393	50.813	38.973	41.787	62.974	71.565	89.947
808.5	40.607	49.059	46.61	39.427	34.484	60.468	56.053	58.149	54.816	61.909	62.194	67.844	60.19	41.521	39.421	42.373	39.797	64.503	50.276	58.883	48.584	53.422	43.402	53.77	50.292	51.382	50.78	39.043	41.974	63.354	72.109	89.779
809	40.613	48.991	46.573	39.684	34.548	60.593	56.145	58.038	54.777	62.008	62.243	67.944	60.284	41.543	39.437	42.394	39.791	64.334	50.131	58.89	48.68	53.702	43.455	53.936	50.385	51.33	50.69	39.155	42.137	63.045	72.539	89.523
809.5	40.5	48.852	46.402	39.705	34.546	60.675	56.306	58.078	55.059	62.392	62.258	68.293	60.455	41.453	39.515	42.355	39.703	64.363	50.009	58.927	48.865	53.768	43.357	53.98	50.379	51.471	50.764	39.096	42.097	62.117	72.186	89.763
810	40.488	48.927	46.365	39.561	34.652	60.753	56.481	58.016	55.191	62.679	62.385	68.42	60.528	41.368	39.525	42.361	39.632	64.496	49.956	58.917	48.773	53.666	43.302	54.014	50.506	51.568	50.909	39.081	42.009	62.214	71.76	89.925
810.5	40.553	48.876	46.528	39.523	34.779	60.86	56.458	58.003	55.128	62.587	62.442	68.404	60.483	41.296	39.505	42.36	39.583	64.597	49.974	58.945	48.602	53.586	43.244	53.889	50.556	51.525	50.838	39.087	42.003	62.801	71.352	90.176
811	40.635	48.86	46.505	39.503	34.755	60.77	56.207	57.957	54.893	62.337	62.319	68.247	60.446	41.247	39.536	42.337	39.597	64.578	50.078	59.023	48.423	53.525	43.29	53.83	50.579	51.488	50.805	39.081	42.005	63.21	71.425	89.937
811.5	40.565	48.786	46.465	39.394	34.533	60.604	56.008	58.07	55.005	62.251	62.22	68.225	60.528	41.167	39.549	42.314	39.659	64.341	50.23	59.048	48.425	53.5	43.337	53.809	50.524	51.522	50.886	39.021	41.976	63.268	71.721	89.668
812	40.438	48.73	46.469	39.302	34.434	60.512	55.954	58.122	55.122	62.36	62.295	68.353	60.668	41.113	39.456	42.318	39.682	64.204	50.124	58.983	48.503	53.461	43.384	53.922	50.501	51.529	50.82	39.053	41.948	63.289	71.688	89.607
812.5	40.445	48.644	46.397	39.266	34.392	60.543	55.944	58.185	55.219	62.436	62.33	68.335	60.724	41.092	39.304	42.276	39.618	64.233	50.007	58.918	48.599	53.401	43.364	53.882	50.326	51.45	50.764	39.091	41.96	62.698	71.214	89.872
813	40.479	48.687	46.251	39.227	34.305	60.58	55.912	58.12	55.152	62.587	62.402	68.309	60.705	41.046	39.195	42.182	39.522	64.293	49.917	58.911	48.443	53.432	43.264	53.889	50.178	51.376	50.917	39.094	41.971	62.285	70.999	89.963
813.5	40.539	48.715	46.23	39.29	34.226	60.609	55.976	58.113	55.103	62.679	62.431	68.307	60.773	41.004	39.125	42.169	39.503	64.261	50.018	58.917	48.337	53.64	43.186	53.889	50.181	51.37	51.047	39.083	41.849	62.642	71.403	89.844
814	40.524	48.849	46.349	39.376	34.274	60.548	56.087	58.101	55.045	62.608	62.416	68.302	60.796	41.051	39.156	42.189	39.522	64.359	50.143	59.014	48.399	53.789	43.176	53.965	50.406	51.236	50.947	38.968	41.65	63.075	71.847	89.401
814.5	40.61	49.051	46.593	39.374	34.426	60.435	56.174	58.062	55.026	62.588	62.455	68.197	60.701	41.159	39.317	42.189	39.501	64.558	50.363	59.214	48.61	53.797	43.228	53.93	50.54	51.111	50.797	38.903	41.623	63.116	71.745	89.128
815	40.55	49.084	46.725	39.276	34.547	60.363	56.15	57.95	54.97	62.536	62.407	68.092	60.414	41.162	39.368	42.166	39.374	64.759	50.472	59.302	48.664	53.696	43.286	53.775	50.619	51.138	50.66	38.965	41.809	63.056	71.397	89.067
815.5	40.541	48.943	46.593	39.32	34.565	60.308	56.032	57.923	54.884	62.395	62.325	67.992	60.261	41.047	39.261	42.113	39.234	64.59	50.325	59.115	48.5	53.718	43.205	53.655	50.523	51.362	50.666	39.214	42.039	62.889	71.169	89.459
816	40.568	48.907	46.524	39.571	34.485	60.329	55.973	58.079	54.815	62.254	62.223	67.963	60.246	40.906	39.135	42.033	39.155	64.269	50.017	58.846	48.29	53.614	43.204	53.693	50.459	51.469	50.678	39.337	42.102	62.402	71.221	89.847
816.5	40.614	48.922	46.461	39.68	34.376	60.424	55.999	58.088	54.686	62.263	62.274	67.942	60.294	40.877	39.015	41.954	39.205	64.29	49.825	58.803	48.305	53.359	43.229	53.843	50.343	51.388	50.666	39.374	42.083	62.594	71.06	89.772
817	40.439	48.925	46.402	39.642	34.354	60.392	55.922	57.924	54.66	62.373	62.186	67.843	60.26	40.958	38.978	41.932	39.289	64.562	49.941	58.868	48.519	53.218	43.266	53.835	50.285	51.275	50.633	39.3	42.04	63.068	70.766	89.547
817.5	40.175	48.805	46.345	39.436	34.405	60.294	55.841	57.962	54.807	62.464	62.23	67.684	60.34	41.051	38.93	41.921	39.333	64.67	50.038	58.888	48.534	53.409	43.197	53.889	50.153	51.136	50.697	39.261	41.953	63.554	70.757	89.859
818	40.273	48.603	46.37	39.377	34.42	60.433	55.847	58.198	55.065	62.505	62.426	67.747	60.366	41.099	39.016	41.859	39.391	64.76	50.157	58.903	48.482	53.7	43.127	53.925	50.12	51.126	50.743	39.355	41.828	63.086	70.826	89.864
818.5	40.554	48.567	46.392	39.281	34.364	60.608	55.88	58.276	54.96	62.415	62.371	67.926	60.195	41.105	39.083	41.838	39.399	64.717	50.133	58.883	48.372	53.755	43.167	53.844	50.163	51.169	50.809	39.489	41.834	62.227	71.098	89.407
819	40.718	48.673	46.531	39.355	34.324	60.584	55.907	58.184	54.67	62.232	62.206	67.96	60.144	41.072	39.079	41.875	39.334	64.532	50.083	58.81	48.342	53.656	43.319	53.751	50.188	51.326	50.751	39.434	41.95	61.624	70.898	89.67
819.5	40.742	48.901	46.658	39.457	34.284	60.507	55.899	58.188	54.618	62.348	62.315	67.899	60.286	40.878	38.954	41.886	39.097	64.434	50.099	58.686	48.307	53.588	43.32	53.615	50.207	51.376	50.65	39.321	41.97	62.217	70.904	90.245
820	40.811	49.188	46.782	39.672	34.276	60.452	55.884	58.224	54.738	62.536	62.556	67.866	60.284	40.673	38.909	41.807	38.994	64.616	50.203	58.851	48.417	53.495	43.188	53.472	50.181	51.237	50.549	39.235	41.91	63.099	70.647	90.414
820.5	40.748	49.046	46.815	39.371	34.187	60.5	55.848	58.173	54.856	62.697	62.443	67.8	60.184	40.609	38.828	41.745	39.01	64.671	50.071	58.913	48.485	53.641	43.2	53.586	50.191	51.189	50.58	39.247	41.898	63.306	70.867	90.453
821	40.556	48.825	46.625	39.168	34.151	60.43	55.855	57.983	54.877	62.447	62.367	67.657	60.206	40.725	38.841	41.771	39.057	64.479	49.949	58.924	48.419	53.737	43.163	53.728	50.16	51.197	50.519	39.29	42.012	63.499	71.138	90.05
821.5	40.494	48.78	46.595	39.219	34.286	60.407	55.867	57.667	54.755	62.186	62.308	67.556	60.32	40.616	38.809	41.782	38.916	64.44	50.128	58.976	48.483	53.75	43.024	53.745	50.164	51.263	50.506	39.184	42.067	63.632	71.647	89.762
822	40.569	48.969	46.646	39.415	34.315	60.4	55.916	57.609	54.785	62.075	62.215	67.565	60.33	40.507	38.81	41.711	38.792	64.698	50.399	59.074	48.654	53.696	43.031	53.71	50.263	51.191	50.588	39.117	42.103	63.676	71.623	89.576
822.5	40.616	48.91	46.592	39.374	34.261	60.411	55.994	57.849	54.966	62.036	62.072	67.501	60.178	40.549	38.758	41.641	38.732	64.883	50.445	58.87	48.691	53.647	43.134	53.611	50.275	51.083	50.702	39.127	41.98	63.263	70.771	89.478
823	40.653	48.838	46.605	39.441	34.259	60.409	56.201	58.046	54.952	62.022	62.097	67.7	60.092	40.623	38.738	41.639	38.774	64.821	50.356	58.681	48.591	53.538	43.116	53.682	50.31	51.207	50.917	39.303	41.884	62.939	70.041	89.141
823.5	40.616	48.617	46.565	39.421	34.167	60.564	56.322	57.922	54.896	62.186	62.274	68.057	60.165	40.568	38.696	41.62	38.806	64.749	50.319	58.824	48.559	53.497	43.141	53.839	50.294	51.221	50.809	39.4	41.839	62.942	70.377	89.457
824	40.533	48.571	46.369	39.314	34.036	60.712	56.319	57.777	54.824	62.41	62.374	68.188	60.414	40.449	38.631	41.444	38.882	64.745	50.31	59.086	48.605	53.493	43.279	53.836	50.379	51.083	50.597	39.537	41.905	62.812	71.09	89.76
824.5	40.502	48.873	46.261	39.16	33.892	60.763	56.242	57.822	54.842	62.363	62.261	68.024	60.447	40.427	38.612	41.321	38.881	64.566	50.161	59.058	48.54	53.639	43.201	53.695	50.376	51.074	50.409	39.576	41.983	62.796	71.255	89.573
825	40.454	49.271	46.201	39.15	33.935	60.69	56.115	57.907	54.811	62.192	62.008	67.858	60.406	40.441	38.623	41.278	38.847	64.475	50.113	59.03	48.55	53.719	43.052	53.65	50.236	51.167	50.377	39.543	41.977	62.997	71.097	88.71
825.5	40.31	49.19	46.189	39.294	33.97	60.453	56.002	57.859	54.822	62.126	61.923	67.84	60.299	40.399	38.58	41.241	38.803	64.364	50.112	59.05	48.652	53.654	42.939	53.554	49.995	51.091	50.284	39.421	41.93	62.923	71.148	88.399
826	40.42	49.112	46.263	39.534	34.084	60.141	55.92	57.822	54.806	62.287	62.055	67.828	60.241	40.298	38.574	41.181	38.797	64.34	50.141	58.992	48.634	53.518	42.919	53.498	49.958	50.932	50.287	39.348	41.98	62.428	71.509	89.012
826.5	40.705	49.12	46.305	39.477	34.181	60.021	55.907	57.85	54.875	62.233	62.067	67.928	60.132	40.245	38.522	41.181	38.625	64.528	50.156	58.928	48.482	53.318	42.971	53.573	50.113	50.871	50.265	39.295	42.014	62.252	71.72	89.672
827	40.841	49.083	46.321	39.314	34.273	60.074	55.942	57.958	54.884	62.137	61.948	68.01	60.183	40.189	38.459	41.229	38.513	64.679	50.243	58.976	48.403	53.328	43.086	53.559	50.271	50.894	50.202	39.261	41.843	62.472	71.302	89.791
827.5	40.73	48.828	46.482	39.182	34.234	60.194	55.998	57.892	54.81	62.238	61.933	68.136	60.189	40.102	38.34	41.293	38.514	64.817	50.337	59.072	48.512	53.462	43.116	53.518	50.356	50.83	50.177	39.275	41.816	62.864	70.826	89.201
828	40.584	48.745	46.58	39.058	34.149	60.297	55.976	57.646	54.698	62.291	61.997	68.116	60.104	40.016	38.286	41.43	38.546	64.673	50.274	58.909	48.423	53.518	43.088	53.553	50.326	50.694	50.193	39.314	41.868	62.828	70.717	88.888
828.5	40.582	48.71	46.583	38.999	34.153	60.337	55.78	57.583	54.838	62.245	62.035	67.85	60.102	40.007	38.214	41.464	38.546	64.439	50.16	58.812	48.308	53.461	43.134	53.527	50.207	50.623	50.118	39.267	41.84	62.841	70.866	89.302
829	40.578	48.705	46.642	39.103	34.056	60.384	55.654	57.778	54.893	62.131	61.92	67.579	60.114	40.018	38.19	41.279	38.5	64.422	50.161	58.989	48.289	53.476	43.146	53.545	50.196	50.646	50.172	39.241	41.718	62.738	71.518	90.561
829.5	40.651	48.844	46.841	39.279	34.008	60.499	55.705	57.848	54.824	62.003	61.916	67.502	60.143	40.036	38.183	40.995	38.491	64.66	50.247	59.104	48.372	53.393	43.099	53.598	50.2	50.754	50.308	39.249	41.707	62.996	72.052	90.803
830	40.721	48.982	46.693	39.322	33.998	60.557	55.838	57.822	54.693	61.885	62.012	67.621	59.986	40.05	38.124	40.894	38.478	64.817	50.313	59.029	48.399	53.342	43.051	53.769	50.135	50.701	50.288	39.254	41.658	62.829	72.263	90.189
830.5	40.752	49.129	46.424	39.391	34.079	60.509	55.866	57.771	54.728	61.979	62.177	67.794	59.851	40.074	38.051	41.006	38.385	64.669	50.319	58.904	48.425	53.345	43.052	53.848	50.162	50.672	50.132	39.255	41.699	62.734	71.877	89.523
831	40.75	49.167	46.302	39.538	34.097	60.476	55.892	57.733	54.774	62.044	62.107	67.936	59.825	39.967	38.003	41.051	38.278	64.496	50.291	58.926	48.473	53.376	42.932	53.726	50.265	50.725	50.114	39.243	41.848	62.357	71.367	90.008
831.5	40.665	49.006	46.355	39.595	34.058	60.562	55.999	57.58	54.632	62.144	62.286	68.002	60.052	39.837	37.937	40.961	38.133	64.525	50.316	58.924	48.668	53.605	42.958	53.761	50.363	50.856	50.158	39.136	41.864	62.154	70.927	90.689
832	40.618	48.816	46.483	39.459	34.007	60.645	56.046	57.673	54.712	62.208	62.37	68.111	60.319	39.71	37.925	40.838	38.048	64.696	50.364	59.024	48.77	53.766	43.167	54.014	50.365	50.849	50.107	39.101	41.799	62.243	71.074	91.068
832.5	40.631	48.907	46.604	39.383	34.157	60.634	55.994	57.823	54.734	62.352	62.322	67.97	60.288	39.66	37.911	40.896	38.069	64.7	50.339	58.924	48.694	53.813	43.262	54.04	50.391	50.715	50.005	39.05	41.78	62.549	71.155	90.423
833	40.513	48.962	46.447	39.247	34.357	60.622	55.851	57.808	54.527	62.282	62.116	67.852	60.103	39.749	37.792	40.95	38.038	64.578	50.112	58.722	48.497	53.629	43.157	53.841	50.402	50.621	49.853	39.045	41.845	62.638	71.134	89.621
833.5	40.427	48.844	46.249	39.161	34.386	60.665	55.769	57.865	54.557	62.121	61.985	67.775	59.976	39.846	37.771	40.952	37.986	64.463	50.026	58.662	48.383	53.563	43.154	53.742	50.48	50.655	49.856	39.086	41.887	62.58	71.353	89.388
834	40.378	48.633	46.112	39.073	34.236	60.646	55.751	57.918	54.773	62.055	61.993	67.815	60.067	39.775	37.79	40.72	37.984	64.314	50.121	58.661	48.294	53.628	43.225	53.78	50.393	50.707	50	39.271	41.962	62.891	71.744	89.568
834.5	40.455	48.769	46.266	39.221	34.265	60.568	55.762	57.987	54.868	62.093	61.959	67.688	60.085	39.645	37.746	40.531	38.016	64.288	50.266	58.7	48.402	53.588	43.207	53.787	50.241	50.702	50.016	39.366	42.044	62.819	72.022	89.624
835	40.656	48.89	46.468	39.324	34.363	60.428	55.828	57.809	54.632	62.207	61.991	67.857	60.194	39.592	37.755	40.543	37.96	64.389	50.32	58.696	48.587	53.548	42.997	53.756	50.225	50.611	50.04	39.235	41.918	62.589	72.091	89.425
835.5	40.744	48.982	46.57	39.343	34.417	60.433	55.974	57.833	54.51	62.344	61.993	68.04	60.284	39.622	37.799	40.563	37.839	64.475	50.166	58.66	48.656	53.489	42.904	53.713	50.314	50.537	50.11	39.067	41.826	62.202	72.01	89.979
836	40.785	49.05	46.509	39.408	34.362	60.475	56.022	57.815	54.463	62.42	61.972	68.018	60.21	39.661	37.766	40.465	37.861	64.577	50.029	58.636	48.536	53.522	42.929	53.686	50.278	50.393	50.01	38.943	41.829	62.559	71.992	90.553
836.5	40.758	48.92	46.275	39.354	34.316	60.62	56.068	57.758	54.5	62.317	61.834	67.865	59.99	39.589	37.692	40.419	38.061	64.607	49.959	58.764	48.399	53.518	43.008	53.756	50.2	50.382	49.854	39.049	41.863	63.03	71.924	91.013
837	40.689	48.7	46.105	39.261	34.209	60.734	56.146	57.691	54.595	62.169	61.812	67.949	59.908	39.484	37.661	40.445	37.975	64.56	49.967	58.803	48.39	53.489	43.093	53.755	50.241	50.452	49.899	39.23	41.845	63.059	72.088	90.661
837.5	40.652	48.706	46.145	39.26	34.182	60.692	56.222	57.763	54.633	62.085	61.895	67.97	59.945	39.42	37.651	40.35	37.711	64.673	50.092	58.813	48.562	53.535	43.119	53.707	50.488	50.56	49.99	39.351	41.882	62.572	72.178	89.904
838	40.686	48.858	46.495	39.472	34.139	60.61	56.22	57.938	54.575	62.023	62.099	67.807	59.992	39.289	37.545	40.277	37.547	64.679	50.185	58.659	48.664	53.716	43.112	53.677	50.652	50.667	50.084	39.23	41.917	62.224	71.783	89.15
838.5	40.712	48.772	46.549	39.518	34.091	60.574	56.204	58.081	54.504	62.096	62.242	67.807	60.136	39.155	37.387	40.261	37.556	64.422	50.214	58.642	48.621	53.721	43.057	53.641	50.702	50.767	50.099	39.099	41.858	62.565	71.375	88.734
839	40.598	48.717	46.475	39.32	34.126	60.561	56.16	58.162	54.612	62.108	62.163	68.034	60.282	39.125	37.398	40.336	37.545	64.323	50.165	58.767	48.559	53.56	43.078	53.496	50.533	50.797	50.149	39.178	41.86	62.947	71.425	88.993
839.5	40.526	48.762	46.502	39.227	34.226	60.526	56.052	58.103	54.668	62.121	61.934	68.173	60.216	39.074	37.369	40.291	37.519	64.535	50.153	58.922	48.548	53.5	43.234	53.478	50.499	50.695	50.136	39.267	41.862	63.052	71.763	89.171
840	40.606	48.979	46.573	39.337	34.48	60.458	55.883	58.014	54.612	62.117	61.854	68.042	60.059	39.089	37.292	40.099	37.599	64.594	50.238	58.83	48.478	53.535	43.208	53.579	50.358	50.447	50.145	39.184	41.755	62.779	71.721	89.231
840.5	40.684	48.962	46.553	39.298	34.503	60.584	55.855	57.88	54.466	61.969	61.694	67.845	59.825	39.066	37.287	40.037	37.762	64.58	50.199	58.66	48.462	53.45	43.078	53.727	50.205	50.397	50.171	39.065	41.743	62.582	71.363	89.655
841	40.738	48.999	46.49	39.167	34.609	60.526	55.761	57.811	54.447	61.921	61.783	67.747	59.83	39.177	37.311	40.115	37.822	64.456	49.958	58.495	48.255	53.401	42.974	53.655	50.106	50.484	50.08	39.169	41.887	62.881	70.782	89.244
841.5	40.782	49.024	46.477	39.125	34.566	60.365	55.698	57.755	54.467	62.055	62.043	67.744	60.009	39.126	37.233	40.109	37.693	64.485	49.957	58.567	48.317	53.447	42.975	53.608	50.141	50.548	49.808	39.184	41.83	62.595	71.014	88.891
842	40.76	49.096	46.41	39.196	34.384	60.274	55.824	57.656	54.504	62.27	62.239	67.834	60.274	38.926	37.209	39.949	37.568	64.611	50.184	58.717	48.494	53.487	42.795	53.596	49.959	50.464	49.827	39.207	41.836	62.232	70.974	88.838
842.5	40.667	48.938	46.51	39.312	34.249	60.25	56.066	57.785	54.584	62.248	62.193	67.779	60.131	38.796	37.188	39.804	37.412	64.728	50.309	58.842	48.541	53.501	42.768	53.576	49.879	50.482	50.082	39.281	41.946	61.936	70.908	89.325
843	40.569	48.797	46.527	39.387	34.286	60.374	56.037	57.723	54.423	62.283	62.092	67.854	59.973	38.758	37.089	39.729	37.266	64.815	50.309	58.884	48.626	53.577	42.902	53.531	49.963	50.432	50.025	39.378	41.954	62.592	71.203	89.493
843.5	40.557	48.699	46.564	39.255	34.188	60.533	55.944	57.66	54.306	62.351	62.16	67.73	59.896	38.697	37.052	39.763	37.164	64.784	50.294	58.801	48.585	53.662	43.115	53.513	50.181	50.329	49.782	39.419	41.924	62.958	71.658	89.168
844	40.441	48.702	46.58	39.015	34.121	60.622	55.845	57.654	54.355	62.443	62.101	67.531	59.883	38.605	37.129	39.855	37.166	64.718	50.36	58.649	48.554	53.741	43.229	53.662	50.416	50.345	49.717	39.433	42.006	62.712	70.996	88.249
844.5	40.356	48.618	46.52	38.997	34.197	60.586	55.878	57.642	54.403	62.522	61.964	67.397	59.912	38.681	37.141	39.816	37.276	64.764	50.371	58.673	48.536	53.685	43.212	53.849	50.369	50.419	49.73	39.453	42.154	62.213	70.612	88.384
845	40.446	48.389	46.165	39.151	34.199	60.52	55.89	57.569	54.478	62.543	61.954	67.518	59.876	38.82	37.108	39.729	37.401	64.944	50.464	58.934	48.697	53.67	43.131	53.787	50.09	50.357	49.686	39.452	42.089	62.307	71.041	89.219
845.5	40.45	48.531	46.104	39.46	34.155	60.398	55.868	57.624	54.58	62.378	62.02	67.787	59.799	38.869	37.086	39.666	37.422	64.944	50.344	59.104	48.606	53.617	43.052	53.568	49.987	50.126	49.518	39.475	41.956	62.701	71.242	89.801
846	40.541	48.827	46.452	39.598	34.374	60.263	55.915	57.644	54.392	62.174	61.823	67.829	59.75	38.806	36.949	39.621	37.314	64.673	50.116	59.091	48.477	53.435	43.084	53.665	50.224	49.996	49.425	39.382	41.931	62.456	70.608	89.552
846.5	40.545	48.71	46.774	39.478	34.552	60.432	55.942	57.519	54.103	62.089	61.773	67.751	59.841	38.666	36.77	39.667	37.197	64.703	50.096	59.047	48.58	53.244	43.163	53.741	50.283	50.138	49.544	39.364	42.013	62.426	70.631	89.51
847	40.576	48.567	46.876	39.398	34.573	60.65	55.913	57.561	54.095	62.144	62.008	67.927	60.016	38.547	36.741	39.773	37.095	64.822	50.248	58.913	48.739	53.271	43.167	53.602	50.237	50.259	49.702	39.426	42.168	62.613	71.249	89.74
847.5	40.632	48.634	46.84	39.386	34.573	60.768	55.876	57.778	54.326	62.291	62.169	68.031	60.026	38.565	36.807	39.797	37.001	64.54	50.137	58.549	48.504	53.493	43.11	53.337	50.087	50.208	49.625	39.474	42.2	62.694	71.152	89.7
848	40.728	48.826	46.812	39.343	34.626	56.284	51.768	58.012	54.554	62.437	62.137	68.119	60.081	38.583	36.677	39.588	36.93	64.327	49.973	58.31	48.042	53.792	43.067	53.299	49.9	49.996	49.504	39.385	42.09	62.67	70.813	89.612
848.5	15.827	19.007	18.268	15.332	13.467	13.491	12.423	22.511	21.181	24.43	24.226	26.497	23.426	14.951	14.186	15.35	14.366	25.15	19.444	22.741	18.681	20.862	16.761	20.895	19.473	19.392	19.287	15.287	16.278	24.372	27.609	35.194

## Sheet: Sheet2
" File:	Users\t4chr\Desktop\spectrometer data qu
" TRANS	-> Wave:564.75nm Pix:1050 Val: 55.954 Time:800ms Avg:1 Sm:1 Sg:0 Tc:off SNAP Xt:3 Ch:1 Xtrig
184	0.001
184.5	0.001
185	0.001
185.5	0.001
186	0.001
186.5	0.001
187	0.001
187.5	0.001
188	0.001
188.5	0.001
189	0.001
189.5	-182.66
190	55.819
190.5	27.467
191	15.472
191.5	17.959
192	-24.198
192.5	-65.303
193	-79.63
193.5	2.4933
194	37.64
194.5	31.492
195	28.025
195.5	22.388
196	17.787
196.5	20.895
197	28.219
197.5	34.664
198	47.585
198.5	59.6
199	70.873
199.5	64.702
200	54.943
200.5	47.493
201	34.528
201.5	28.617
202	8.2886
202.5	-20.222
203	-102.3
203.5	-118.71
204	-78.004
204.5	-44.973
205	-20.548
205.5	-14.983
206	-0.45193
206.5	8.1319
207	-0.18776
207.5	-5.2692
208	17.994
208.5	48.628
209	74.678
209.5	79.23
210	56.491
210.5	27.203
211	2.04
211.5	-11.043
212	-9.9292
212.5	5.2247
213	26.924
213.5	49.277
214	70.413
214.5	53.718
215	43.958
215.5	49.286
216	52.459
216.5	62.303
217	59.75
217.5	46.148
218	30.663
218.5	17.212
219	20.418
219.5	28.979
220	39.318
220.5	54.01
221	55.219
221.5	48.495
222	47.296
222.5	48.43
223	59.167
223.5	71.625
224	83.97
224.5	83.893
225	71.733
225.5	67.324
226	54.592
226.5	42.33
227	34.817
227.5	40.522
228	47.568
228.5	52.761
229	59.431
229.5	56.676
230	50.87
230.5	49.226
231	50.249
231.5	52.334
232	53.622
232.5	55.889
233	58.463
233.5	59.788
234	60.47
234.5	58.996
235	56.351
235.5	55.38
236	56.38
236.5	57.717
237	58.545
237.5	58.526
238	57.908
238.5	56.946
239	56.118
239.5	55.823
240	55.525
240.5	55.268
241	54.837
241.5	54.496
242	53.947
242.5	53.615
243	53.867
243.5	53.975
244	54.142
244.5	54.125
245	53.751
245.5	53.339
246	53.025
246.5	52.859
247	52.857
247.5	52.907
248	52.8
248.5	52.571
249	52.133
249.5	51.479
250	50.992
250.5	50.642
251	50.568
251.5	50.593
252	50.553
252.5	50.382
253	50.257
253.5	50.268
254	50.216
254.5	50.229
255	50.165
255.5	50.075
256	49.928
256.5	49.76
257	49.519
257.5	49.153
258	48.814
258.5	48.614
259	48.551
259.5	48.64
260	48.759
260.5	48.7
261	48.478
261.5	48.225
262	48.257
262.5	48.231
263	48.2
263.5	48.257
264	48.019
264.5	47.811
265	47.611
265.5	47.502
266	47.629
266.5	47.894
267	48.358
267.5	48.521
268	48.456
268.5	48.161
269	47.777
269.5	47.586
270	47.519
270.5	47.61
271	47.556
271.5	47.567
272	47.652
272.5	47.594
273	47.566
273.5	47.373
274	47.272
274.5	47.352
275	47.301
275.5	47.152
276	46.947
276.5	46.82
277	46.802
277.5	46.859
278	46.93
278.5	46.945
279	46.985
279.5	46.894
280	46.522
280.5	45.974
281	45.77
281.5	45.881
282	46.219
282.5	46.649
283	46.7
283.5	46.62
284	46.465
284.5	46.397
285	46.428
285.5	46.476
286	46.484
286.5	46.419
287	46.169
287.5	45.776
288	45.465
288.5	45.301
289	45.292
289.5	45.55
290	45.845
290.5	46.115
291	46.327
291.5	46.215
292	45.932
292.5	45.63
293	45.363
293.5	45.247
294	45.325
294.5	45.463
295	45.523
295.5	45.555
296	45.779
296.5	45.812
297	45.857
297.5	45.739
298	45.115
298.5	44.816
299	44.739
299.5	44.806
300	45.079
300.5	45.314
301	45.375
301.5	45.382
302	45.158
302.5	44.604
303	44.28
303.5	44.088
304	44.105
304.5	44.429
305	44.622
305.5	44.731
306	44.709
306.5	44.568
307	44.291
307.5	44.119
308	44.099
308.5	44.011
309	44.212
309.5	44.381
310	44.371
310.5	44.397
311	44.378
311.5	44.478
312	44.624
312.5	44.581
313	44.427
313.5	44.304
314	44.222
314.5	44.185
315	44.2
315.5	44.094
316	43.868
316.5	43.608
317	43.323
317.5	42.993
318	42.845
318.5	42.743
319	42.611
319.5	42.822
320	42.898
320.5	42.85
321	42.589
321.5	42.27
322	41.955
322.5	41.701
323	41.623
323.5	41.64
324	41.711
324.5	41.711
325	41.667
325.5	41.466
326	41.431
326.5	41.547
327	41.548
327.5	41.502
328	41.5
328.5	41.238
329	41.074
329.5	40.986
330	40.977
330.5	40.931
331	40.873
331.5	40.69
332	40.388
332.5	40.499
333	40.588
333.5	40.729
334	41.01
334.5	40.985
335	40.879
335.5	40.881
336	40.751
336.5	40.682
337	40.513
337.5	40.375
338	40.498
338.5	40.55
339	40.761
339.5	40.973
340	41.137
340.5	41.325
341	41.277
341.5	40.993
342	40.656
342.5	40.418
343	40.379
343.5	40.295
344	40.249
344.5	40.293
345	40.008
345.5	39.7
346	39.556
346.5	39.375
347	39.367
347.5	39.401
348	39.604
348.5	39.775
349	39.842
349.5	39.697
350	39.509
350.5	39.727
351	39.962
351.5	40.271
352	40.445
352.5	40.423
353	40.452
353.5	40.265
354	40.177
354.5	40.106
355	40.257
355.5	40.422
356	40.313
356.5	40.184
357	39.983
357.5	39.656
358	39.646
358.5	39.385
359	39.052
359.5	38.888
360	38.675
360.5	38.72
361	38.857
361.5	38.9
362	39.048
362.5	39.105
363	38.869
363.5	38.82
364	38.92
364.5	39.298
365	39.476
365.5	39.666
366	39.632
366.5	39.438
367	39.45
367.5	39.38
368	39.201
368.5	39.275
369	39.413
369.5	39.368
370	39.356
370.5	38.987
371	38.34
371.5	38.044
372	37.931
372.5	38.298
373	38.408
373.5	38.275
374	38.185
374.5	38.292
375	38.458
375.5	38.529
376	38.229
376.5	37.577
377	37.23
377.5	36.95
378	37.177
378.5	37.737
379	38.598
379.5	38.853
380	38.73
380.5	38.369
381	37.623
381.5	37.64
382	38.264
382.5	38.735
383	39.736
383.5	39.866
384	39.376
384.5	39.168
385	38.774
385.5	38.532
386	38.525
386.5	38.705
387	39.017
387.5	39.403
388	39.567
388.5	39.672
389	39.547
389.5	39.694
390	39.816
390.5	39.995
391	40.204
391.5	40.151
392	40.138
392.5	40.612
393	40.929
393.5	40.498
394	39.927
394.5	39.427
395	39.733
395.5	40.479
396	40.99
396.5	41.189
397	41.375
397.5	41.281
398	40.667
398.5	40.007
399	39.056
399.5	38.475
400	38.637
400.5	39.035
401	39.252
401.5	39.46
402	40.077
402.5	41.297
403	42.54
403.5	42.751
404	42.234
404.5	42.006
405	41.962
405.5	42.142
406	42.065
406.5	41.607
407	41.65
407.5	41.423
408	41.375
408.5	41.4
409	41.797
409.5	42.407
410	42.473
410.5	42.364
411	42.029
411.5	42.103
412	42.146
412.5	42.245
413	42.458
413.5	42.469
414	42.823
414.5	42.445
415	42.207
415.5	42.064
416	42.026
416.5	41.914
417	41.474
417.5	41.249
418	41.484
418.5	41.678
419	41.681
419.5	41.191
420	40.988
420.5	41.218
421	42.099
421.5	42.64
422	42.892
422.5	42.922
423	42.976
423.5	43.163
424	42.961
424.5	42.834
425	42.92
425.5	43.265
426	43.378
426.5	42.919
427	42.154
427.5	41.558
428	41.401
428.5	41.421
429	41.68
429.5	42.209
430	42.317
430.5	42.353
431	42.099
431.5	41.964
432	42.116
432.5	42.292
433	42.435
433.5	42.667
434	43.021
434.5	42.988
435	43.019
435.5	42.771
436	42.593
436.5	42.35
437	41.971
437.5	42.028
438	42.021
438.5	41.77
439	41.493
439.5	41.06
440	40.988
440.5	41.122
441	41.409
441.5	42.03
442	42.751
442.5	43.261
443	43.224
443.5	42.858
444	42.436
444.5	42.347
445	42.594
445.5	42.958
446	43.184
446.5	43.109
447	42.776
447.5	42.552
448	42.402
448.5	42.583
449	42.73
449.5	43.067
450	42.989
450.5	42.599
451	42.39
451.5	42.311
452	42.365
452.5	42.624
453	42.582
453.5	42.44
454	42.651
454.5	42.767
455	42.653
455.5	42.637
456	42.31
456.5	42.18
457	42.495
457.5	42.506
458	42.454
458.5	42.101
459	41.801
459.5	41.638
460	41.959
460.5	42.491
461	43.157
461.5	43.606
462	43.394
462.5	43.145
463	42.809
463.5	42.726
464	42.584
464.5	42.695
465	42.915
465.5	43.292
466	43.135
466.5	42.894
467	42.563
467.5	42.574
468	42.702
468.5	42.745
469	42.644
469.5	42.686
470	42.533
470.5	42.5
471	42.484
471.5	42.553
472	42.587
472.5	42.443
473	42.396
473.5	42.445
474	42.789
474.5	42.953
475	43.178
475.5	43.095
476	42.956
476.5	42.663
477	42.342
477.5	42.092
478	41.745
478.5	41.556
479	41.549
479.5	41.557
480	41.815
480.5	42.034
481	41.936
481.5	42.012
482	41.961
482.5	41.927
483	41.722
483.5	41.225
484	41.012
484.5	41.238
485	41.578
485.5	41.853
486	41.895
486.5	41.814
487	41.817
487.5	41.748
488	41.852
488.5	41.933
489	42.155
489.5	42.257
490	42.12
490.5	41.849
491	41.533
491.5	41.321
492	41.418
492.5	41.657
493	42.073
493.5	42.466
494	42.462
494.5	42.205
495	41.919
495.5	41.809
496	41.93
496.5	42.115
497	42.338
497.5	42.619
498	42.824
498.5	42.886
499	42.791
499.5	42.772
500	42.89
500.5	42.975
501	43.068
501.5	42.965
502	43.054
502.5	43.275
503	43.434
503.5	43.554
504	43.534
504.5	43.569
505	43.833
505.5	44.016
506	44.09
506.5	44.156
507	44.33
507.5	44.524
508	44.571
508.5	44.466
509	44.397
509.5	44.609
510	44.821
510.5	44.922
511	44.966
511.5	44.94
512	45.212
512.5	45.702
513	46.229
513.5	46.77
514	47.076
514.5	47.113
515	47.166
515.5	47.036
516	47.033
516.5	47.17
517	47.597
517.5	48.238
518	49.065
518.5	49.65
519	49.815
519.5	49.74
520	49.591
520.5	49.724
521	50.233
521.5	50.812
522	51.177
522.5	51.445
523	51.62
523.5	51.838
524	52.162
524.5	52.33
525	52.667
525.5	52.793
526	53.061
526.5	53.227
527	53.329
527.5	53.483
528	53.554
528.5	53.83
529	54.101
529.5	54.502
530	54.779
530.5	54.857
531	54.857
531.5	54.669
532	54.944
532.5	55.47
533	56.099
533.5	56.27
534	55.781
534.5	55.09
535	54.848
535.5	54.902
536	55.042
536.5	55.198
537	55.483
537.5	55.71
538	55.95
538.5	56.017
539	56.155
539.5	56.326
540	56.345
540.5	56.192
541	56.149
541.5	56.196
542	56.437
542.5	56.581
543	56.526
543.5	56.249
544	56.183
544.5	56.031
545	56.041
545.5	56.005
546	56.068
546.5	56.371
547	56.603
547.5	56.751
548	56.839
548.5	56.813
549	56.79
549.5	56.656
550	56.615
550.5	56.583
551	56.604
551.5	56.627
552	56.637
552.5	56.79
553	56.723
553.5	56.704
554	56.787
554.5	57.121
555	57.27
555.5	57.061
556	56.747
556.5	56.509
557	56.598
557.5	56.723
558	56.777
558.5	56.666
559	56.414
559.5	56.49
560	56.522
560.5	56.677
561	56.494
561.5	56.276
562	56.189
562.5	56.141
563	56.246
563.5	56.197
564	56.067
564.5	55.941
565	55.896
565.5	55.591
566	55.219
566.5	54.854
567	54.604
567.5	54.734
568	54.833
568.5	54.792
569	54.406
569.5	53.669
570	53.416
570.5	53.471
571	53.605
571.5	53.616
572	53.408
572.5	53.433
573	53.505
573.5	53.552
574	53.505
574.5	53.12
575	53.097
575.5	53.023
576	53.219
576.5	53.298
577	53.039
577.5	52.988
578	52.755
578.5	52.792
579	52.541
579.5	52.146
580	52.011
580.5	52.089
581	52.242
581.5	52.071
582	51.79
582.5	51.646
583	51.533
583.5	51.658
584	51.514
584.5	51.57
585	51.62
585.5	51.554
586	51.261
586.5	50.75
587	50.305
587.5	50.401
588	50.534
588.5	50.539
589	50.278
589.5	50.008
590	49.961
590.5	50.005
591	49.785
591.5	49.633
592	49.712
592.5	49.965
593	50.347
593.5	50.61
594	50.716
594.5	50.413
595	50.218
595.5	50.248
596	50.422
596.5	50.322
597	50.035
597.5	49.752
598	49.653
598.5	49.545
599	49.466
599.5	49.423
600	49.384
600.5	49.55
601	49.816
601.5	49.928
602	50.001
602.5	49.811
603	49.612
603.5	49.324
604	49.241
604.5	49.229
605	49.324
605.5	49.438
606	49.54
606.5	49.438
607	49.183
607.5	49.009
608	48.992
608.5	49.003
609	48.981
609.5	49.051
610	49.238
610.5	49.27
611	49.126
611.5	48.563
612	47.973
612.5	47.659
613	47.833
613.5	48.133
614	48.339
614.5	48.252
615	48.038
615.5	47.795
616	47.692
616.5	47.79
617	47.796
617.5	47.69
618	47.296
618.5	47.09
619	46.981
619.5	47.177
620	47.263
620.5	47.238
621	47.198
621.5	47.262
622	47.268
622.5	47.194
623	46.939
623.5	46.808
624	46.695
624.5	46.743
625	46.849
625.5	46.846
626	46.843
626.5	46.737
627	46.904
627.5	46.913
628	46.689
628.5	46.415
629	46.167
629.5	46.2
630	46.543
630.5	46.823
631	46.931
631.5	46.462
632	46.098
632.5	45.984
633	46.098
633.5	46.267
634	46.09
634.5	45.795
635	45.596
635.5	45.716
636	45.875
636.5	45.791
637	45.574
637.5	45.556
638	45.741
638.5	45.873
639	45.786
639.5	45.768
640	45.732
640.5	45.806
641	45.469
641.5	45.115
642	44.743
642.5	44.733
643	44.753
643.5	44.767
644	44.701
644.5	44.781
645	44.757
645.5	44.635
646	44.587
646.5	44.338
647	43.977
647.5	43.539
648	43.641
648.5	43.802
649	43.966
649.5	43.909
650	43.866
650.5	43.575
651	43.199
651.5	43.081
652	43.129
652.5	43.332
653	43.219
653.5	43.08
654	42.911
654.5	42.829
655	42.805
655.5	43.037
656	43.272
656.5	43.485
657	43.535
657.5	43.418
658	43.097
658.5	42.611
659	42.305
659.5	42.369
660	42.422
660.5	42.467
661	42.562
661.5	42.652
662	42.613
662.5	42.148
663	41.956
663.5	41.963
664	41.909
664.5	41.558
665	41.434
665.5	41.517
666	41.655
666.5	41.484
667	41.261
667.5	41.304
668	41.186
668.5	41.204
669	41.095
669.5	41.188
670	41.188
670.5	41.012
671	40.9
671.5	40.718
672	40.67
672.5	40.898
673	41.071
673.5	40.888
674	40.462
674.5	40.328
675	40.616
675.5	40.713
676	40.897
676.5	40.911
677	40.757
677.5	40.76
678	40.772
678.5	41.092
679	41.025
679.5	41.201
680	41.37
680.5	41.398
681	41.084
681.5	40.91
682	41.043
682.5	41.398
683	41.555
683.5	41.62
684	41.733
684.5	41.848
685	41.794
685.5	41.71
686	41.787
686.5	41.949
687	42.275
687.5	42.794
688	43.235
688.5	43.615
689	43.969
689.5	44.476
690	45.015
690.5	45.518
691	46.05
691.5	46.368
692	46.554
692.5	47.029
693	47.764
693.5	48.921
694	49.855
694.5	50.41
695	50.553
695.5	50.997
696	51.789
696.5	52.713
697	53.408
697.5	53.93
698	54.474
698.5	55.364
699	56.542
699.5	57.706
700	58.246
700.5	58.584
701	58.992
701.5	59.718
702	60.57
702.5	61.504
703	62.542
703.5	63.528
704	64
704.5	64.549
705	65.099
705.5	65.796
706	65.909
706.5	65.878
707	66.407
707.5	67.438
708	68.675
708.5	69.598
709	70.221
709.5	70.332
710	70.565
710.5	70.798
711	71.29
711.5	71.787
712	72.367
712.5	72.942
713	73.593
713.5	74.486
714	75.077
714.5	75.363
715	75.188
715.5	75.342
716	75.59
716.5	76.456
717	77.33
717.5	78.226
718	78.542
718.5	78.538
719	78.351
719.5	78.502
720	79.255
720.5	80.065
721	80.458
721.5	80.517
722	80.829
722.5	81.255
723	81.459
723.5	81.287
724	81.419
724.5	81.685
725	82.214
725.5	82.631
726	82.924
726.5	83.318
727	83.621
727.5	83.829
728	83.507
728.5	83.492
729	83.457
729.5	83.715
730	83.938
730.5	84.397
731	84.759
731.5	85.139
732	85.447
732.5	85.704
733	85.82
733.5	85.802
734	86.028
734.5	86.174
735	86.512
735.5	86.341
736	86.507
736.5	86.499
737	86.643
737.5	86.746
738	86.904
738.5	86.988
739	86.942
739.5	87.012
740	86.703
740.5	86.035
741	85.808
741.5	86.16
742	86.519
742.5	86.905
743	87.178
743.5	87.689
744	87.726
744.5	87.804
745	87.713
745.5	87.561
746	87.414
746.5	87.371
747	87.674
747.5	87.903
748	88.444
748.5	88.541
749	88.427
749.5	88.309
750	88.49
750.5	88.359
751	88.29
751.5	88.325
752	88.399
752.5	88.048
753	87.771
753.5	87.999
754	88.59
754.5	88.748
755	88.872
755.5	88.809
756	88.686
756.5	88.03
757	87.837
757.5	88.347
758	88.87
758.5	88.422
759	88.131
759.5	88.233
760	88.478
760.5	88.699
761	88.625
761.5	88.676
762	88.53
762.5	88.568
763	88.776
763.5	89.022
764	89.401
764.5	89.712
765	89.614
765.5	89.303
766	89.029
766.5	89.239
767	89.394
767.5	89.067
768	88.56
768.5	88.348
769	88.464
769.5	88.711
770	88.916
770.5	88.751
771	88.489
771.5	88.59
772	88.918
772.5	88.865
773	89.048
773.5	89.452
774	89.459
774.5	89.205
775	88.936
775.5	89.318
776	89.494
776.5	89.786
777	89.706
777.5	89.651
778	89.51
778.5	89.228
779	89.248
779.5	89.3
780	89.346
780.5	89.307
781	89.025
781.5	88.87
782	88.713
782.5	89.234
783	89.546
783.5	89.722
784	89.415
784.5	89.316
785	89.627
785.5	89.594
786	89.699
786.5	89.67
787	89.634
787.5	89.358
788	89.198
788.5	89.22
789	89.066
789.5	88.624
790	88.781
790.5	89.12
791	89.177
791.5	88.804
792	88.983
792.5	89.685
793	90.228
793.5	89.998
794	89.505
794.5	89.545
795	90.193
795.5	90.066
796	89.25
796.5	88.697
797	88.716
797.5	88.808
798	88.921
798.5	88.853
799	88.603
799.5	88.622
800	88.911
800.5	88.964
801	89.065
801.5	89.147
802	88.955
802.5	88.866
803	89.029
803.5	89.161
804	89.714
804.5	89.713
805	89.433
805.5	88.934
806	88.482
806.5	88.573
807	89.22
807.5	89.966
808	89.947
808.5	89.779
809	89.523
809.5	89.763
810	89.925
810.5	90.176
811	89.937
811.5	89.668
812	89.607
812.5	89.872
813	89.963
813.5	89.844
814	89.401
814.5	89.128
815	89.067
815.5	89.459
816	89.847
816.5	89.772
817	89.547
817.5	89.859
818	89.864
818.5	89.407
819	89.67
819.5	90.245
820	90.414
820.5	90.453
821	90.05
821.5	89.762
822	89.576
822.5	89.478
823	89.141
823.5	89.457
824	89.76
824.5	89.573
825	88.71
825.5	88.399
826	89.012
826.5	89.672
827	89.791
827.5	89.201
828	88.888
828.5	89.302
829	90.561
829.5	90.803
830	90.189
830.5	89.523
831	90.008
831.5	90.689
832	91.068
832.5	90.423
833	89.621
833.5	89.388
834	89.568
834.5	89.624
835	89.425
835.5	89.979
836	90.553
836.5	91.013
837	90.661
837.5	89.904
838	89.15
838.5	88.734
839	88.993
839.5	89.171
840	89.231
840.5	89.655
841	89.244
841.5	88.891
842	88.838
842.5	89.325
843	89.493
843.5	89.168
844	88.249
844.5	88.384
845	89.219
845.5	89.801
846	89.552
846.5	89.51
847	89.74
847.5	89.7
848	89.612
848.5	35.194
