# Supplementary material for: Tomato yellow leaf curl virus manipulates Bemisia tabaci, MEAM1 both directly and indirectly through changes in visual and volatile cues
Source: PeerJ. 2024 Jul 23;12:e17665. doi: 10.7717/peerj.17665 (PMC11276755; doi:10.7717/peerj.17665)
Supplement: Supplemental Information 8 [file peerj-12-17665-s008.xlsx]

## Sheet: Sheet1
wavelength	late.stage.tylcv.2.2.21.a.yel	late.stage.tylcv.2.2.21.b.y1	late.stage.tylcv.2.3.21.a.y1	y1a.feb16.1monthinfected.	y1a.feb17.infected.	y1b.feb16.1monthinfected.	y1b.feb17.infected.	y1.mar24.1month.infected	y1.late.stage.tylcv.leaf.3.16.21	y1.b.infected.1-month.3.23	y1.a.infected.1-month.3.23	y1.4.13.21.tylcv leaf. 1 monthinfected	y1.4.14.21.tylcv leaf. 1 monthinfected
184	0.001	0.001	0.001	0.001	0.001	0.001	0.001	0.001	0.001	0.001	0.001	0.001	0.001
184.5	0.001	0.001	0.001	0.001	0.001	0.001	0.001	0.001	0.001	0.001	0.001	0.001	0.001
185	0.001	0.001	0.001	0.001	0.001	0.001	0.001	0.001	0.001	0.001	0.001	0.001	0.001
185.5	0.001	0.001	0.001	0.001	0.001	0.001	0.001	0.001	0.001	0.001	0.001	0.001	0.001
186	0.001	0.001	0.001	0.001	0.001	0.001	0.001	0.001	0.001	0.001	0.001	0.001	0.001
186.5	0.001	0.001	0.001	0.001	0.001	0.001	0.001	0.001	0.001	0.001	0.001	0.001	0.001
187	0.001	0.001	0.001	0.001	0.001	0.001	0.001	0.001	0.001	0.001	0.001	0.001	0.001
187.5	0.001	0.001	0.001	0.001	0.001	0.001	0.001	0.001	0.001	0.001	0.001	0.001	0.001
188	0.001	0.001	0.001	0.001	0.001	0.001	0.001	0.001	0.001	0.001	0.001	0.001	0.001
188.5	0.001	0.001	0.001	0.001	0.001	0.001	0.001	0.001	0.001	0.001	0.001	0.001	0.001
189	0.001	0.001	0.001	0.001	0.001	0.001	0.001	0.001	0.001	0.001	0.001	0.001	0.001
189.5	70.161	91.531	118.14	162.93	296.54	254.26	75.677	-418.73	-212.57	-255.29	-209.36	-946.77	-191.92
190	135.48	215.54	234.18	436.62	731.69	598.55	132.53	-216.71	-80.53	-133.66	-103.41	-360.22	-70.811
190.5	-939.48	-1829.9	-2262.9	-7075.8	-12672	-9637.5	126.29	-80.697	-14.837	-32.028	-19.516	-40.998	1.9339
191	-126.44	-215.86	-403.1	-242.02	-470.44	-339.52	136.17	-67.782	-16.707	-26.908	-27.687	-31.546	21.312
191.5	-116.76	-216.51	-415.73	-166.68	-380.83	-300.9	223.57	-72.157	-13.818	-38.5	-56.272	-20.87	36.975
192	-240.3	-360.19	-600.82	-89.38	-216.19	-176.64	262.28	-56.268	2.9257	-30.893	-52.092	-17.143	42.658
192.5	-605.25	-815.11	-1183.3	-56.147	-145.83	-125.4	319.29	-47.561	6.3987	-32.691	-52.169	-16.771	41.382
193	-1590.3	-2079.7	-2786.7	-45.167	-116.91	-99.594	334.28	-46.858	1.5319	-38.991	-58.034	-15.359	37.613
193.5	-1758.7	-2254.7	-3012.7	-56.806	-128.66	-108.85	309.91	-52.372	1.1573	-45.015	-57.421	-16.597	32.651
194	-551.87	-666.05	-935.43	-69.548	-145.61	-114.3	312.11	-56.525	4.614	-43.013	-46.68	-17.692	28.326
194.5	-290.4	-344.28	-533.62	-85.457	-157.41	-109.32	310.88	-59.755	13.836	-37.615	-32.972	-15.254	24.463
195	-330.27	-372.67	-585.36	-106.89	-182.74	-120.08	324.24	-56.793	27.376	-30.286	-18.93	-15.551	21.553
195.5	-399.67	-433.66	-634.1	-116.1	-210.59	-140.11	330.19	-55.684	29.768	-27.781	-16.506	-17.051	17.699
196	1822.1	2271.9	2815.7	-112.52	-230.67	-152.21	293.54	-58.627	22.571	-35.525	-23.836	-19.582	12.27
196.5	1408.1	1761.5	2202.9	-100.96	-242.17	-166.11	265.46	-52.998	15.089	-39.851	-26.578	-22.932	11.433
197	881.45	1168.9	1493.8	-82.495	-224.06	-162.93	253.2	-48.137	5.4507	-41.86	-25.87	-23.782	11.362
197.5	685.79	910.69	1218.8	-67.966	-178.34	-126.38	256.05	-39.796	1.5026	-40.793	-20.292	-21.657	9.8528
198	14163	16579	24461	-55.429	-136.02	-105.56	283.94	-31.569	7.1837	-33.243	-14.453	-19.209	9.1322
198.5	7024.5	8268.7	12180	-56.778	-122.6	-113.87	296.21	-38.302	13.418	-30.412	-15.329	-17.613	3.224
199	-507.3	-485.12	-774.9	-65.002	-132.25	-134.4	269.86	-53.002	18.418	-37.637	-20.52	-16.683	-4.9735
199.5	-350.96	-342.93	-523	-71.41	-148.94	-157.4	259.43	-64.393	18.048	-42.936	-27.686	-16.832	-7.7048
200	-340.86	-386.88	-549.28	-70.128	-155.23	-156.6	250.56	-70.17	13.279	-43.184	-32.061	-17.294	-5.0166
200.5	-360.66	-460.53	-643.28	-53.153	-132.83	-123.04	255.59	-60.286	17.432	-39.065	-28.99	-15.474	3.8961
201	-421.97	-549.71	-792.96	-36.23	-104.25	-95.51	296.68	-43.781	26.882	-31.196	-20.299	-15.16	8.4187
201.5	-550.08	-727.01	-1072.6	-29.683	-91.783	-81.635	307.91	-34.339	34.199	-22.932	-15.497	-17.515	7.8158
202	-329.53	-489.07	-704.99	-33.861	-95.402	-77.277	316.65	-34.271	30.57	-28.165	-17.757	-20.523	6.7253
202.5	-194.4	-348.81	-489.6	-46.949	-111.21	-81.748	346.78	-36.687	19.444	-33.752	-22.642	-22.649	5.1558
203	-138.96	-295.74	-404.13	-64.645	-133.17	-87.718	378.2	-46.178	6.0119	-36.489	-32.352	-20.717	10.442
203.5	-98.976	-257.42	-350.3	-69.817	-138.27	-86.801	509.46	-61.478	-6.1364	-47.779	-38.158	-18.358	16.6
204	-125.77	-303.48	-435.66	-59.848	-124.37	-76.389	679.7	-70.626	-9.8807	-49.971	-33.811	-15.659	23.229
204.5	-295.94	-608.48	-859.6	-59.424	-121.39	-79.221	535.64	-86.702	-16.348	-50.091	-34.064	-15.724	27.532
205	1436	2540	3291.6	-55.113	-112.38	-79.125	386.51	-91.281	-20.184	-49.319	-29.862	-21.799	26.075
205.5	952.86	1535.5	1945.1	-51.427	-104.08	-72.625	323.09	-75.479	-11.99	-39.31	-19.697	-25.849	23.603
206	1506.4	2378.1	2952.4	-58.363	-111.7	-81.395	329.05	-64.837	-2.1678	-37.306	-18.212	-26.192	19.078
206.5	-918.62	-1444.4	-1814	-60.013	-116.81	-87.808	367	-53.801	6.6598	-37.956	-15.627	-24.306	15.07
207	-270.25	-457.28	-557.52	-61.758	-121.59	-90.488	409.91	-41.447	16.978	-34.348	-11.693	-19.022	13.731
207.5	-209.3	-373.44	-437.24	-62.618	-131.43	-104.51	417.91	-35.645	23.213	-36.077	-14.969	-13.616	15.948
208	-154.91	-307.35	-355.8	-47.786	-119.03	-103.84	355.5	-35.916	23.935	-40.335	-19.303	-12.542	16.57
208.5	-97.945	-224.07	-246.48	-30.506	-93.824	-87.124	325.08	-38.165	23.745	-38.799	-22.395	-10.218	16.924
209	-87.354	-185.8	-215.4	-18.678	-79.18	-76.119	316.87	-43.31	20.711	-40.674	-28.542	-5.3313	19.85
209.5	-91.136	-168.66	-228.98	-20.87	-75.999	-71.847	328.09	-44.356	14.134	-42.527	-29.198	-1.7871	22.47
210	-116.72	-203.06	-288.86	-33.654	-83.44	-75	362.54	-40.793	14.354	-39.414	-29.582	2.4404	24.281
210.5	-164.52	-264.02	-385.19	-48.191	-101.59	-83.254	347.17	-34.584	19.618	-36.782	-28.848	1.6824	26.196
211	-139.44	-217.72	-353.53	-58.405	-114.21	-87.864	321.52	-32.402	21.059	-35.401	-23.094	-2.918	25.578
211.5	-75.943	-129.71	-238.43	-61.422	-116.42	-86.696	289.76	-31.613	24.925	-29.065	-18.99	-4.6772	22.262
212	-62.168	-89.613	-194.32	-59.302	-108.66	-82.201	276.79	-32.898	22.347	-26.889	-15.808	-4.1011	20.087
212.5	-75.919	-80.238	-199.38	-45.91	-96.176	-74.023	322.46	-35.283	18.449	-28.912	-12.863	-0.21173	18.509
213	-80.11	-78.475	-192.14	-37.861	-90.739	-69.909	350.65	-39.964	13.431	-32.506	-18.239	2.4745	17.988
213.5	-73.778	-96.13	-195.07	-32.8	-86.041	-67.858	383.48	-44.205	9.7746	-37.833	-26.323	3.5994	20.69
214	-62.034	-103.78	-191.64	-21.697	-80.241	-61.919	496.87	-37.079	12.085	-35.66	-28.433	1.7788	21.043
214.5	-47.837	-98.531	-185.76	-16.318	-78.478	-63.514	451.1	-31.676	14.207	-31.987	-30.25	-3.0953	18.388
215	-64.527	-135.67	-255.62	-11.672	-75.721	-67.248	442.23	-27.371	18.444	-23.085	-25.437	-6.748	17.96
215.5	-156.91	-214.58	-404.24	-11.421	-75.192	-67.016	428.97	-25.524	21.445	-14.545	-18.299	-9.7231	16.28
216	-228.98	-269.55	-505.89	-20.16	-88.582	-72.244	286.96	-28.969	23.084	-10.519	-15.314	-9.8142	15.533
216.5	-233.27	-284.28	-509.11	-30.941	-98.898	-64.421	332.74	-26.544	25.167	-4.4621	-11.424	-9.2074	18.184
217	-195.47	-243.3	-414.82	-46.558	-108.81	-58.971	408.11	-20.665	30.131	-2.0885	-8.2655	-9.8814	19.3
217.5	-124.67	-195.86	-327.44	-59.068	-129.99	-62.686	442.32	-11.928	34.848	0.41337	-6.5035	-11.109	20.485
218	-90.846	-200.63	-320.33	-59.673	-135.26	-66.061	543.95	-7.6451	37.335	0.65667	-7.1782	-14.482	21.067
218.5	-56.912	-173.37	-277.54	-58.101	-139.1	-79.981	496.95	-11.778	35.664	-4.8936	-9.9625	-14.803	18.734
219	-16.368	-163.17	-254.7	-52.854	-151.48	-89.067	426.24	-13.316	30.598	-6.371	-11.462	-12.296	16.376
219.5	3.3412	-137.73	-204.17	-41.063	-141.4	-87.551	408.32	-16.722	24.487	-9.3894	-13.94	-10.675	15.44
220	-2.551	-97.414	-143.76	-30.378	-125.01	-83.316	377.36	-23.082	19	-15.339	-13.495	-7.0833	15.774
220.5	-10.879	-87.391	-132.95	-25.232	-110.9	-78.064	360.3	-26.827	19.013	-18.03	-11.638	-2.6851	16.268
221	-17.634	-66.484	-121.23	-27.044	-94.888	-78.875	309.85	-38.37	16.441	-29.567	-15.084	-0.85809	15.327
221.5	-27.2	-52.414	-114.13	-32.654	-85.917	-79.279	258.44	-53.235	13.703	-43.264	-18.705	1.8328	11.874
222	-38.088	-54.568	-132.97	-43.108	-90.464	-84.144	257.23	-52.045	14.31	-40.902	-16.921	2.7688	10.569
222.5	-45.437	-58.666	-158.93	-55.484	-103.98	-95.19	246.8	-34.863	15.254	-26.424	-5.743	2.0179	11.661
223	-46.977	-73.188	-189.6	-61.782	-120.33	-103.67	258.14	-23.961	18.292	-12.201	1.4026	3.2751	12.84
223.5	-42.201	-109.13	-256.74	-56.206	-123.26	-103.93	302.89	-15.939	20.859	-3.2761	4.2284	4.7796	16.157
224	-25.011	-139.91	-296.76	-44.642	-107.47	-89.367	374.99	-12.548	22.549	-1.8149	4.3628	7.1527	18.755
224.5	-56.442	-204.08	-367.64	-30.273	-86.839	-62.428	636.3	-19.432	22.205	-7.7887	-1.6948	7.2465	19.405
225	-144.36	-262.55	-438.68	-20.315	-75.355	-47.514	-3207.5	-21.443	22.521	-15.893	-3.4879	5.5613	19.94
225.5	-167.66	-207.16	-343.16	-13.243	-69.579	-35.625	-3474	-19.546	23.954	-17.502	0.096881	4.1352	19.06
226	-175.7	-177.13	-281.41	-12.167	-73.157	-27.132	-653.87	-20.602	21.64	-15.332	2.3173	3.2751	17.73
226.5	-153.37	-142.38	-235.03	-18.082	-79.785	-32.003	-583.01	-15.687	20.579	-11.066	5.2409	3.4038	16.802
227	-103.79	-101.71	-198.07	-18.609	-72.999	-31.639	-473.12	-8.4374	20.379	-6.2287	7.7945	5.2732	18.117
227.5	-72.946	-81.604	-188.37	-16.909	-61.479	-28.586	-496.3	-3.3144	19.506	-3.1594	9.2378	6.5507	19.801
228	-47.707	-59.314	-162.31	-11.771	-46.511	-28.614	-358.25	0.75306	21.489	0.58586	11.424	6.4317	19.786
228.5	-33.906	-54.223	-141.39	-3.1507	-32.814	-23.959	-216.96	3.3853	24.217	3.8253	12.609	8.3562	19.913
229	-19.461	-48.514	-108.8	0.82182	-29.075	-19.545	-177.45	4.0091	25.021	5.0048	11.571	9.9615	19.492
229.5	-15.487	-42.281	-87.891	2.8163	-28.07	-17.429	-136.29	4.854	25.161	6.2304	10.628	10.57	19.344
230	-8.9048	-26.696	-74.254	5.5647	-24.572	-12.8	-99.018	7.0979	23.835	6.8049	10.295	11.921	20.025
230.5	6.7353	-5.4425	-48.291	8.5146	-17.014	-5.1073	-66.474	9.3244	22.172	8.1966	10.299	13.13	19.724
231	18.425	7.5517	-29.839	13.147	-7.21	2.2581	-32.49	11.262	22.232	11.363	12.348	13.404	19.137
231.5	26.926	16.148	-15.452	16.931	1.2215	8.6679	-12.362	13.018	24.262	14.693	14.725	13.972	18.677
232	30.223	19.182	-4.1539	19.15	7.5969	14.153	1.9188	14.953	26.893	17.678	17.257	14.38	18.293
232.5	27.645	22.359	3.7077	21.149	12.151	17.241	12.924	16.752	27.951	19.412	19.444	14.402	18.449
233	24.809	26.177	10.369	22.789	16.681	20.135	21.94	18.453	28.388	20.665	21.026	14.667	18.652
233.5	23.35	29.145	16.388	25.1	20.319	22.725	28.87	20.206	28.11	21.397	22.499	15.017	18.564
234	24.785	32.299	21.697	27.578	22.726	24.305	32.245	21.589	27.689	22.057	23.833	15.327	18.495
234.5	30.493	34.3	25.131	29.983	24.99	26.741	34.631	23.044	28.064	23.24	24.981	15.464	18.354
235	35.158	35.492	27.973	31.837	27.09	29.057	36.675	24.133	28.495	24.13	25.891	15.737	18.176
235.5	38.611	36.737	29.993	32.389	28.963	30.586	37.827	24.883	28.808	25.302	26.51	15.993	18.074
236	40.494	37.441	31.277	32.706	30.744	31.985	39.04	25.695	29.037	26.461	26.742	16.043	17.942
236.5	40.561	38.32	32.566	33.026	31.856	32.814	39.87	25.975	29.204	26.952	26.848	16.144	17.8
237	40.064	38.831	33.814	33.467	32.518	33.172	39.862	26.131	29.139	27.226	26.908	16.236	17.616
237.5	39.267	38.827	35	34.116	32.8	33.575	39.896	26.246	29.028	27.277	27.107	16.252	17.488
238	38.561	39.165	36.134	34.713	33.028	34.03	40.08	26.341	29.24	27.272	27.48	16.295	17.391
238.5	38.268	39.068	37.294	34.957	33.329	34.32	40.218	26.526	29.37	27.45	27.734	16.224	17.346
239	38.022	38.723	38.115	35.18	33.616	34.624	40.36	26.711	29.479	27.745	27.881	16.082	17.289
239.5	37.941	38.542	38.561	35.332	33.956	34.827	40.298	26.892	29.511	28.001	27.881	16.014	17.196
240	37.503	38.157	38.481	35.306	34.211	34.982	40.175	27.13	29.291	28.16	27.735	15.987	17.109
240.5	36.729	37.851	38.128	35.336	34.487	35.328	40.04	27.417	29.213	28.366	27.75	15.953	16.955
241	36.515	37.743	37.84	35.325	34.748	35.768	40.054	27.733	29.314	28.525	27.922	15.926	16.816
241.5	36.43	37.788	37.874	35.426	34.994	36.182	40.255	28.064	29.478	28.66	28.097	15.886	16.743
242	36.401	37.757	38.085	35.612	35.138	36.492	40.316	28.232	29.597	28.809	28.212	15.812	16.682
242.5	36.333	37.585	38.216	35.841	35.326	36.603	40.168	28.29	29.604	28.871	28.169	15.818	16.637
243	36	37.519	38.255	36.079	35.5	36.515	39.905	28.395	29.521	29.029	28.124	15.873	16.588
243.5	35.617	37.422	38.246	36.156	35.543	36.347	39.674	28.483	29.356	29.166	28.138	15.897	16.483
244	35.442	37.339	38.369	36.142	35.645	36.329	39.654	28.616	29.332	29.233	28.29	15.871	16.383
244.5	35.254	37.263	38.484	36.038	35.633	36.294	39.803	28.722	29.354	29.323	28.529	15.753	16.285
245	35.008	37.081	38.362	35.933	35.543	36.238	39.857	28.779	29.406	29.346	28.777	15.629	16.201
245.5	34.776	36.739	38.045	35.87	35.494	36.277	39.768	28.881	29.53	29.389	29.001	15.551	16.157
246	34.544	36.388	37.681	35.842	35.475	36.232	39.526	28.988	29.576	29.523	29.057	15.551	16.112
246.5	34.387	36.107	37.379	35.783	35.521	36.249	39.235	29.113	29.598	29.68	29.007	15.636	16.082
247	34.274	35.806	37.13	35.688	35.663	36.337	39.123	29.219	29.624	29.781	28.907	15.718	16.103
247.5	34.148	35.655	36.915	35.625	35.852	36.377	39.053	29.221	29.617	29.834	28.798	15.776	16.135
248	33.951	35.635	36.789	35.579	35.945	36.477	38.983	29.185	29.565	29.806	28.8	15.825	16.166
248.5	33.839	35.648	36.691	35.549	35.998	36.559	38.989	29.177	29.473	29.821	28.908	15.873	16.191
249	33.734	35.602	36.704	35.495	36.004	36.547	38.904	29.186	29.392	29.908	28.973	15.902	16.192
249.5	33.483	35.4	36.705	35.48	36.014	36.505	38.783	29.236	29.297	29.933	28.999	15.946	16.194
250	33.26	35.095	36.558	35.457	36.048	36.356	38.614	29.264	29.219	29.902	28.994	15.985	16.206
250.5	33.036	34.842	36.338	35.43	36.078	36.182	38.455	29.271	29.203	29.822	28.976	16.012	16.235
251	32.934	34.755	36.151	35.474	36.044	36.104	38.3	29.342	29.199	29.746	28.992	16.054	16.262
251.5	32.966	34.743	36.009	35.5	35.929	36.115	38.179	29.389	29.255	29.763	29.013	16.1	16.275
252	32.911	34.724	35.886	35.502	35.88	36.203	38.083	29.408	29.344	29.844	29.027	16.161	16.323
252.5	32.796	34.678	35.788	35.519	35.804	36.222	37.941	29.396	29.388	29.891	29.015	16.226	16.377
253	32.556	34.621	35.684	35.572	35.839	36.229	37.864	29.318	29.363	29.83	29.026	16.301	16.448
253.5	32.223	34.564	35.528	35.592	35.881	36.2	37.786	29.272	29.285	29.819	29.089	16.392	16.555
254	31.993	34.475	35.443	35.543	35.741	36.08	37.712	29.247	29.208	29.842	29.13	16.476	16.657
254.5	31.761	34.226	35.362	35.388	35.599	35.942	37.557	29.233	29.121	29.826	29.126	16.561	16.746
255	31.552	33.888	35.214	35.148	35.471	35.846	37.248	29.208	29.041	29.858	29.069	16.653	16.821
255.5	31.535	33.605	35.163	34.944	35.368	35.814	36.947	29.147	28.97	29.83	28.996	16.757	16.891
256	31.514	33.303	35.056	34.795	35.359	35.811	36.711	29.078	28.884	29.729	28.922	16.853	16.959
256.5	31.404	33.123	34.891	34.725	35.353	35.856	36.58	29.012	28.781	29.652	28.819	16.95	17.036
257	31.324	33.056	34.716	34.661	35.219	35.829	36.585	28.933	28.659	29.572	28.718	17.046	17.122
257.5	31.128	32.979	34.467	34.543	35.059	35.648	36.553	28.841	28.538	29.492	28.595	17.087	17.188
258	30.937	32.922	34.204	34.437	34.859	35.48	36.389	28.759	28.441	29.471	28.519	17.121	17.245
258.5	30.846	32.811	33.999	34.358	34.645	35.381	36.186	28.668	28.414	29.458	28.483	17.154	17.298
259	30.76	32.583	33.934	34.272	34.479	35.261	36.027	28.601	28.417	29.446	28.446	17.152	17.336
259.5	30.707	32.343	33.92	34.234	34.387	35.24	35.867	28.517	28.331	29.362	28.341	17.186	17.371
260	30.645	32.187	33.932	34.198	34.387	35.182	35.808	28.429	28.201	29.242	28.225	17.246	17.407
260.5	30.511	32.116	33.922	34.126	34.349	35.024	35.743	28.33	28.047	29.111	28.104	17.275	17.411
261	30.326	32.117	33.731	34.01	34.262	34.905	35.569	28.206	27.922	28.993	27.952	17.293	17.385
261.5	30.198	32.163	33.504	33.867	34.103	34.697	35.348	28.163	27.846	28.943	27.883	17.298	17.352
262	30.124	32.249	33.379	33.693	33.877	34.474	35.143	28.109	27.745	28.916	27.817	17.271	17.295
262.5	30.049	32.18	33.321	33.515	33.718	34.343	35.001	28.038	27.631	28.894	27.804	17.232	17.243
263	30.009	32.014	33.344	33.404	33.604	34.269	34.905	27.962	27.533	28.832	27.857	17.216	17.247
263.5	29.889	31.799	33.336	33.338	33.524	34.259	34.886	27.87	27.455	28.731	27.865	17.186	17.238
264	29.708	31.616	33.195	33.267	33.436	34.24	34.842	27.756	27.402	28.631	27.883	17.167	17.243
264.5	29.629	31.594	33.064	33.224	33.311	34.229	34.727	27.614	27.361	28.601	27.841	17.189	17.27
265	29.511	31.56	32.924	33.166	33.229	34.153	34.653	27.468	27.292	28.604	27.712	17.199	17.244
265.5	29.423	31.491	32.857	33.121	33.142	34.033	34.566	27.322	27.203	28.57	27.584	17.191	17.216
266	29.377	31.367	32.84	33.126	33.098	33.931	34.465	27.257	27.105	28.506	27.454	17.167	17.211
266.5	29.297	31.202	32.802	33.068	33.103	33.796	34.369	27.273	26.966	28.35	27.332	17.121	17.166
267	29.242	31.161	32.841	33.004	33.074	33.688	34.226	27.283	26.864	28.174	27.27	17.096	17.131
267.5	29.159	31.112	32.807	32.956	33.033	33.665	34.075	27.268	26.777	28.056	27.182	17.094	17.117
268	29.113	31.029	32.821	32.88	32.92	33.696	33.911	27.213	26.714	27.959	27.048	17.12	17.071
268.5	29.018	30.908	32.84	32.862	32.78	33.703	33.775	27.119	26.66	27.912	26.943	17.181	17.105
269	28.899	30.854	32.769	32.847	32.712	33.711	33.645	27.056	26.588	27.879	26.837	17.24	17.14
269.5	28.778	30.899	32.755	32.777	32.687	33.704	33.525	26.955	26.522	27.858	26.773	17.243	17.128
270	28.641	31.015	32.646	32.678	32.686	33.53	33.408	26.854	26.47	27.845	26.749	17.224	17.136
270.5	28.598	31.166	32.487	32.559	32.65	33.336	33.275	26.831	26.446	27.853	26.698	17.194	17.13
271	28.526	31.164	32.451	32.347	32.51	33.135	33.156	26.799	26.395	27.923	26.642	17.131	17.126
271.5	28.413	31.006	32.422	32.055	32.339	32.936	33.067	26.761	26.319	27.921	26.573	17.094	17.144
272	28.308	30.779	32.435	31.851	32.201	32.893	33.013	26.682	26.22	27.807	26.504	17.048	17.165
272.5	28.256	30.578	32.525	31.716	32.077	32.861	32.9	26.583	26.171	27.688	26.468	17.005	17.138
273	28.307	30.423	32.588	31.668	32.026	32.814	32.75	26.505	26.14	27.545	26.436	16.986	17.094
273.5	28.37	30.38	32.576	31.744	31.961	32.738	32.623	26.472	26.093	27.462	26.401	16.983	17.039
274	28.374	30.368	32.479	31.766	31.896	32.572	32.539	26.503	26.054	27.468	26.343	16.994	16.975
274.5	28.348	30.409	32.329	31.719	31.824	32.47	32.535	26.489	25.948	27.435	26.293	16.979	16.928
275	28.378	30.516	32.082	31.661	31.689	32.424	32.52	26.425	25.818	27.394	26.213	16.951	16.884
275.5	28.436	30.625	31.955	31.605	31.55	32.34	32.382	26.378	25.74	27.382	26.112	16.943	16.868
276	28.426	30.589	31.964	31.545	31.436	32.351	32.232	26.357	25.671	27.379	26.094	16.939	16.86
276.5	28.372	30.421	31.971	31.503	31.336	32.35	32.116	26.293	25.604	27.35	26.049	16.916	16.839
277	28.195	30.102	31.939	31.495	31.294	32.263	32.055	26.268	25.563	27.278	25.999	16.921	16.842
277.5	28.039	29.787	31.798	31.496	31.328	32.227	32.104	26.219	25.555	27.214	25.964	16.908	16.81
278	27.964	29.597	31.617	31.505	31.307	32.14	32.08	26.107	25.561	27.143	25.865	16.869	16.746
278.5	27.87	29.521	31.446	31.487	31.268	32.005	31.944	26.046	25.576	27.084	25.779	16.798	16.688
279	27.851	29.615	31.52	31.397	31.181	31.924	31.796	25.963	25.614	27.074	25.742	16.708	16.604
279.5	27.826	29.643	31.602	31.265	31.064	31.881	31.656	25.852	25.541	27.018	25.726	16.636	16.539
280	27.644	29.598	31.468	31.161	30.98	31.86	31.582	25.764	25.395	26.951	25.697	16.587	16.492
280.5	27.46	29.56	31.341	31.125	30.889	31.815	31.582	25.671	25.262	26.891	25.662	16.559	16.481
281	27.23	29.486	31.152	31.118	30.833	31.776	31.539	25.605	25.116	26.828	25.641	16.524	16.491
281.5	27.152	29.513	31.13	31.071	30.77	31.748	31.498	25.589	25.041	26.769	25.582	16.477	16.502
282	27.193	29.569	31.249	30.966	30.724	31.658	31.459	25.544	25.003	26.687	25.478	16.444	16.512
282.5	27.226	29.608	31.307	30.802	30.679	31.553	31.408	25.531	24.951	26.633	25.371	16.455	16.521
283	27.333	29.59	31.27	30.642	30.569	31.369	31.358	25.501	24.891	26.602	25.254	16.503	16.543
283.5	27.303	29.437	31.055	30.501	30.417	31.16	31.2	25.456	24.814	26.574	25.155	16.554	16.541
284	27.218	29.217	30.849	30.356	30.312	31.093	31.05	25.417	24.766	26.57	25.107	16.561	16.512
284.5	27.174	28.96	30.763	30.226	30.263	31.053	30.934	25.37	24.748	26.56	25.055	16.525	16.448
285	27.047	28.792	30.683	30.117	30.251	31.018	30.765	25.321	24.739	26.526	25.014	16.458	16.396
285.5	26.92	28.69	30.591	30.027	30.269	30.969	30.614	25.237	24.714	26.47	24.976	16.399	16.379
286	26.758	28.624	30.386	29.977	30.247	30.863	30.404	25.18	24.649	26.37	24.943	16.353	16.376
286.5	26.52	28.56	30.072	29.973	30.208	30.794	30.23	25.116	24.525	26.258	24.918	16.336	16.392
287	26.281	28.526	29.787	29.96	30.163	30.751	30.187	25.049	24.387	26.145	24.866	16.33	16.376
287.5	26.139	28.6	29.683	29.901	30.052	30.691	30.213	25.016	24.326	26.125	24.849	16.314	16.358
288	26.093	28.637	29.706	29.788	29.844	30.581	30.176	24.983	24.304	26.132	24.825	16.331	16.365
288.5	26.055	28.552	29.616	29.645	29.645	30.494	30.085	24.946	24.312	26.196	24.836	16.345	16.34
289	26.021	28.392	29.447	29.53	29.504	30.463	29.982	24.967	24.306	26.258	24.826	16.341	16.313
289.5	25.934	28.211	29.196	29.453	29.419	30.377	29.824	24.987	24.231	26.27	24.752	16.326	16.269
290	25.895	28.041	28.951	29.404	29.381	30.342	29.787	25.027	24.185	26.291	24.71	16.27	16.197
290.5	25.937	27.946	28.821	29.357	29.364	30.292	29.755	25.077	24.182	26.235	24.702	16.218	16.139
291	26.021	27.866	28.739	29.306	29.27	30.226	29.727	25.121	24.266	26.24	24.732	16.169	16.09
291.5	26.114	27.825	28.625	29.29	29.196	30.233	29.777	25.18	24.399	26.249	24.798	16.133	16.075
292	26.186	27.91	28.52	29.316	29.193	30.268	29.845	25.181	24.482	26.253	24.865	16.111	16.066
292.5	26.157	28.013	28.397	29.304	29.216	30.302	29.968	25.205	24.507	26.284	24.866	16.066	16.069
293	26.029	27.991	28.246	29.298	29.235	30.279	30.001	25.221	24.491	26.269	24.833	16.009	16.058
293.5	25.941	27.923	28.165	29.334	29.291	30.221	29.963	25.24	24.514	26.214	24.831	15.978	16.043
294	25.943	27.836	28.145	29.386	29.345	30.176	29.86	25.275	24.589	26.159	24.813	15.97	16.029
294.5	25.99	27.721	28.132	29.443	29.364	30.142	29.704	25.273	24.714	26.139	24.827	15.983	15.996
295	26.127	27.698	28.072	29.396	29.461	30.212	29.65	25.23	24.886	26.162	24.927	16.024	15.957
295.5	26.179	27.65	28.026	29.271	29.509	30.315	29.67	25.215	24.985	26.262	25.053	16.048	15.909
296	26.178	27.712	28.032	29.131	29.454	30.304	29.651	25.179	24.987	26.352	25.117	16.075	15.857
296.5	26.117	27.778	28.023	29.029	29.317	30.243	29.673	25.216	24.949	26.38	25.13	16.051	15.818
297	25.959	27.759	28.001	28.986	29.116	30.14	29.645	25.313	24.846	26.349	25.047	16.014	15.792
297.5	25.895	27.688	27.9	29.018	28.922	30.108	29.586	25.352	24.788	26.292	24.946	15.962	15.78
298	25.917	27.445	27.678	28.997	28.809	30.197	29.581	25.358	24.74	26.221	24.92	15.885	15.788
298.5	25.969	27.264	27.528	28.917	28.743	30.252	29.516	25.3	24.672	26.18	24.957	15.855	15.799
299	26.063	27.147	27.433	28.9	28.733	30.334	29.448	25.218	24.611	26.154	24.994	15.851	15.816
299.5	26.144	27.215	27.37	28.857	28.638	30.233	29.368	25.14	24.492	26.126	25.005	15.889	15.837
300	26.095	27.325	27.35	28.845	28.548	30.071	29.284	25.099	24.437	26.108	25.008	15.94	15.862
300.5	25.978	27.345	27.322	28.901	28.529	29.959	29.228	25.059	24.386	26.066	24.96	15.956	15.872
301	25.813	27.4	27.319	28.933	28.527	29.786	29.185	25.05	24.327	26.085	24.919	15.931	15.858
301.5	25.659	27.319	27.371	28.942	28.586	29.701	29.195	25.074	24.313	26.079	24.838	15.851	15.822
302	25.523	27.214	27.418	28.92	28.59	29.576	29.148	25.089	24.324	26.043	24.732	15.798	15.816
302.5	25.483	27.165	27.386	28.827	28.555	29.426	29.121	25.032	24.298	25.987	24.631	15.778	15.81
303	25.524	27.1	27.24	28.736	28.487	29.315	29.056	24.912	24.236	25.878	24.616	15.769	15.813
303.5	25.418	27.024	27.01	28.65	28.387	29.224	28.999	24.818	24.17	25.822	24.614	15.756	15.806
304	25.387	27.016	26.879	28.577	28.32	29.192	28.94	24.774	24.09	25.813	24.647	15.711	15.751
304.5	25.37	27.02	26.785	28.452	28.306	29.198	28.79	24.801	24.131	25.885	24.712	15.687	15.714
305	25.358	27.047	26.725	28.301	28.267	29.178	28.613	24.866	24.222	26.029	24.726	15.676	15.707
305.5	25.409	27.055	26.658	28.199	28.199	29.194	28.518	24.811	24.273	26.103	24.749	15.702	15.696
306	25.457	27.024	26.5	28.122	28.074	29.248	28.514	24.665	24.244	26.023	24.682	15.759	15.705
306.5	25.361	26.914	26.397	28.119	27.969	29.224	28.542	24.525	24.107	25.797	24.484	15.779	15.736
307	25.162	26.708	26.351	28.075	27.926	29.191	28.575	24.39	23.978	25.581	24.304	15.796	15.739
307.5	25.042	26.592	26.298	27.996	27.817	29.111	28.515	24.33	23.874	25.46	24.154	15.775	15.749
308	24.964	26.539	26.277	27.938	27.71	28.997	28.406	24.302	23.797	25.441	24.046	15.753	15.738
308.5	24.954	26.526	26.267	27.919	27.585	28.956	28.377	24.283	23.719	25.481	24.034	15.756	15.69
309	24.984	26.568	26.298	27.92	27.476	28.895	28.324	24.347	23.676	25.45	23.974	15.751	15.659
309.5	24.898	26.574	26.307	27.915	27.512	28.816	28.202	24.435	23.673	25.366	23.921	15.772	15.69
310	24.827	26.536	26.304	27.854	27.576	28.75	28.099	24.495	23.647	25.306	23.899	15.787	15.743
310.5	24.815	26.516	26.277	27.753	27.532	28.75	27.991	24.463	23.627	25.267	23.845	15.796	15.774
311	24.739	26.436	26.153	27.62	27.537	28.679	27.896	24.375	23.526	25.195	23.781	15.816	15.785
311.5	24.738	26.347	26.072	27.537	27.479	28.614	27.897	24.3	23.403	25.137	23.784	15.795	15.735
312	24.716	26.305	26.035	27.476	27.324	28.529	27.862	24.271	23.388	25.078	23.837	15.755	15.679
312.5	24.635	26.241	25.983	27.45	27.17	28.404	27.758	24.238	23.386	25.019	23.858	15.707	15.625
313	24.512	26.079	25.863	27.428	27	28.353	27.646	24.14	23.437	25.03	23.847	15.656	15.574
313.5	24.374	25.864	25.698	27.418	26.846	28.259	27.553	24.069	23.539	25.071	23.814	15.641	15.551
314	24.263	25.706	25.454	27.45	26.751	28.186	27.523	24	23.561	25.075	23.732	15.627	15.575
314.5	24.183	25.666	25.17	27.486	26.763	28.172	27.572	23.979	23.51	25.036	23.732	15.652	15.657
315	24.246	25.712	25.009	27.571	26.753	28.221	27.621	23.995	23.388	24.993	23.758	15.675	15.709
315.5	24.269	25.82	24.981	27.521	26.831	28.291	27.583	23.932	23.226	24.949	23.699	15.696	15.702
316	24.282	25.86	25.039	27.356	26.919	28.256	27.549	23.903	23.155	24.918	23.651	15.71	15.661
316.5	24.327	25.865	25.236	27.161	26.848	28.135	27.468	23.92	23.206	24.978	23.631	15.689	15.622
317	24.198	25.895	25.342	26.963	26.781	27.94	27.337	23.912	23.26	24.996	23.63	15.635	15.583
317.5	24.105	25.909	25.332	26.85	26.689	27.699	27.235	23.945	23.242	25.01	23.641	15.549	15.559
318	24.083	25.858	25.287	26.827	26.595	27.594	27.106	23.893	23.178	25.007	23.638	15.461	15.54
318.5	24.153	25.793	25.194	26.841	26.595	27.622	27.043	23.783	23.082	24.872	23.57	15.419	15.506
319	24.273	25.762	25.162	26.811	26.556	27.648	27.017	23.701	23.036	24.779	23.43	15.417	15.494
319.5	24.31	25.673	25.124	26.783	26.489	27.728	26.98	23.613	23.11	24.736	23.377	15.452	15.512
320	24.199	25.556	25.126	26.719	26.47	27.686	26.894	23.529	23.099	24.658	23.357	15.458	15.518
320.5	23.979	25.484	25.048	26.657	26.43	27.527	26.75	23.481	23.022	24.622	23.341	15.409	15.51
321	23.787	25.352	24.864	26.644	26.386	27.411	26.566	23.521	22.928	24.599	23.364	15.37	15.492
321.5	23.724	25.322	24.738	26.576	26.272	27.261	26.462	23.624	22.866	24.564	23.386	15.356	15.475
322	23.798	25.393	24.643	26.473	26.08	27.152	26.471	23.71	22.868	24.611	23.375	15.372	15.439
322.5	23.943	25.518	24.646	26.403	25.971	27.173	26.541	23.743	22.93	24.661	23.327	15.404	15.408
323	23.938	25.636	24.73	26.361	25.918	27.212	26.663	23.686	22.955	24.599	23.234	15.42	15.384
323.5	23.832	25.663	24.652	26.417	25.972	27.269	26.741	23.619	22.962	24.522	23.122	15.432	15.343
324	23.723	25.696	24.521	26.487	26.131	27.298	26.593	23.56	22.949	24.425	23.069	15.467	15.32
324.5	23.666	25.664	24.526	26.454	26.163	27.224	26.438	23.533	22.94	24.407	23.023	15.473	15.315
325	23.652	25.534	24.531	26.43	26.124	27.147	26.248	23.476	22.917	24.424	23.012	15.421	15.278
325.5	23.617	25.514	24.67	26.305	25.971	27.04	26.024	23.432	22.855	24.492	23.033	15.334	15.234
326	23.45	25.255	24.689	26.177	25.723	26.955	25.944	23.406	22.795	24.509	23.039	15.254	15.233
326.5	23.395	25.022	24.548	26.095	25.611	26.901	25.892	23.308	22.655	24.455	23.052	15.23	15.236
327	23.46	24.988	24.43	25.937	25.534	26.884	25.859	23.258	22.549	24.445	23.111	15.263	15.251
327.5	23.538	24.894	24.397	25.926	25.587	26.955	25.888	23.234	22.487	24.37	23.088	15.281	15.275
328	23.536	24.875	24.367	25.968	25.644	27.046	25.993	23.247	22.465	24.292	23.055	15.305	15.282
328.5	23.478	24.808	24.429	25.972	25.586	27.053	26.025	23.282	22.51	24.202	23.037	15.327	15.314
329	23.427	24.594	24.443	25.978	25.518	27.013	25.992	23.208	22.541	24.065	22.939	15.338	15.373
329.5	23.283	24.414	24.34	25.84	25.324	26.939	25.889	23.062	22.563	24.003	22.838	15.39	15.403
330	23.168	24.254	24.378	25.62	25.181	26.839	25.645	22.925	22.561	23.979	22.785	15.384	15.439
330.5	23.071	24.101	24.463	25.476	25.05	26.69	25.423	22.819	22.475	24.03	22.718	15.35	15.424
331	22.995	24.106	24.523	25.502	24.994	26.569	25.364	22.758	22.309	24.035	22.622	15.32	15.408
331.5	23.064	24.23	24.492	25.609	25.081	26.452	25.26	22.732	22.145	23.934	22.527	15.256	15.391
332	23.145	24.393	24.379	25.653	25.039	26.324	25.2	22.751	22.065	23.818	22.437	15.252	15.337
332.5	23.035	24.408	24.148	25.63	24.959	26.312	25.196	22.766	22.093	23.69	22.377	15.238	15.339
333	22.973	24.312	24.095	25.557	24.848	26.304	25.138	22.788	22.178	23.701	22.397	15.186	15.314
333.5	22.835	24.167	24.128	25.447	24.673	26.278	25.233	22.808	22.252	23.755	22.437	15.18	15.281
334	22.612	24.018	24.117	25.267	24.666	26.285	25.256	22.812	22.193	23.766	22.447	15.2	15.255
334.5	22.488	24.067	24.056	25.129	24.714	26.216	25.207	22.81	22.129	23.77	22.452	15.251	15.223
335	22.409	24.074	23.901	25.051	24.743	26.123	25.104	22.765	22.006	23.69	22.439	15.315	15.2
335.5	22.409	24.079	23.703	25.163	24.758	26.072	25.017	22.714	21.899	23.679	22.442	15.313	15.186
336	22.483	24.251	23.511	25.302	24.661	26.03	24.993	22.689	21.9	23.658	22.387	15.25	15.151
336.5	22.523	24.369	23.4	25.296	24.587	25.988	24.958	22.633	21.848	23.574	22.264	15.194	15.176
337	22.404	24.518	23.485	25.199	24.51	25.889	24.91	22.55	21.885	23.513	22.122	15.179	15.269
337.5	22.308	24.591	23.636	25.045	24.454	25.763	24.873	22.466	21.898	23.482	22.065	15.17	15.334
338	22.28	24.468	23.684	25.011	24.424	25.663	24.88	22.329	21.91	23.487	22.055	15.176	15.36
338.5	22.249	24.324	23.58	25.056	24.307	25.685	24.955	22.275	21.912	23.542	22.093	15.132	15.284
339	22.321	24.226	23.514	25.019	24.12	25.681	24.984	22.275	21.852	23.572	22.161	15.083	15.154
339.5	22.44	24.178	23.5	25.048	23.931	25.644	24.974	22.245	21.783	23.557	22.151	15.11	15.113
340	22.427	24.081	23.436	25.066	23.814	25.63	24.925	22.23	21.721	23.487	22.108	15.14	15.148
340.5	22.368	24.134	23.229	25.144	23.803	25.574	24.859	22.214	21.662	23.393	22.066	15.179	15.203
341	22.246	24.107	22.961	25.255	23.872	25.517	24.845	22.143	21.608	23.346	21.976	15.186	15.287
341.5	22.201	24.044	22.843	25.154	23.906	25.499	24.765	22.104	21.513	23.341	21.912	15.155	15.323
342	22.256	24.168	23.009	24.938	23.968	25.401	24.618	22.112	21.433	23.365	21.892	15.155	15.313
342.5	22.353	24.194	23.256	24.697	23.969	25.384	24.487	22.176	21.39	23.376	21.87	15.173	15.31
343	22.303	24.155	23.35	24.573	23.907	25.44	24.415	22.274	21.405	23.359	21.852	15.165	15.292
343.5	22.09	24.061	23.264	24.653	23.868	25.459	24.387	22.348	21.473	23.381	21.879	15.173	15.298
344	21.81	23.945	23.171	24.826	23.785	25.46	24.428	22.333	21.5	23.319	21.884	15.178	15.34
344.5	21.814	23.908	23.17	24.909	23.719	25.446	24.38	22.212	21.471	23.191	21.81	15.167	15.352
345	21.993	23.99	23.259	24.849	23.654	25.421	24.388	22.091	21.438	23.092	21.738	15.138	15.343
345.5	22.151	24.052	23.356	24.694	23.639	25.41	24.384	22.043	21.377	23.001	21.69	15.105	15.291
346	22.161	23.901	23.341	24.532	23.684	25.399	24.371	21.997	21.3	22.948	21.661	15.101	15.265
346.5	22.002	23.879	23.268	24.449	23.696	25.392	24.372	22.021	21.282	22.949	21.725	15.132	15.247
347	21.961	23.896	23.272	24.43	23.76	25.372	24.252	21.988	21.246	22.893	21.724	15.192	15.219
347.5	21.956	23.791	23.264	24.541	23.752	25.447	24.134	21.907	21.225	22.823	21.593	15.225	15.213
348	21.965	23.682	23.262	24.645	23.72	25.513	24.018	21.867	21.203	22.835	21.526	15.25	15.202
348.5	21.756	23.394	23.116	24.668	23.71	25.496	23.922	21.816	21.119	22.795	21.451	15.223	15.2
349	21.406	23.154	22.873	24.661	23.673	25.4	23.835	21.793	21.041	22.778	21.407	15.192	15.22
349.5	21.265	23.018	22.747	24.539	23.604	25.142	23.741	21.784	21.043	22.818	21.496	15.203	15.246
350	21.317	22.909	22.827	24.361	23.588	24.888	23.628	21.78	21.055	22.866	21.512	15.184	15.266
350.5	21.436	22.75	22.891	24.299	23.48	24.62	23.522	21.71	21.071	22.802	21.499	15.164	15.269
351	21.341	22.65	22.822	24.223	23.276	24.474	23.52	21.568	21.04	22.681	21.467	15.095	15.233
351.5	21.175	22.661	22.778	24.13	23.137	24.477	23.611	21.463	21.033	22.603	21.476	15.034	15.182
352	21.051	22.637	22.63	24.149	23.064	24.577	23.707	21.477	20.983	22.583	21.546	15.012	15.164
352.5	20.954	22.705	22.694	24.131	23.103	24.78	23.717	21.588	20.961	22.655	21.603	15.011	15.132
353	20.891	22.795	22.86	24.151	23.22	25.004	23.672	21.733	20.932	22.808	21.638	15.015	15.122
353.5	20.754	22.809	22.793	24.19	23.221	25.087	23.683	21.768	20.805	22.802	21.502	14.996	15.101
354	20.431	22.851	22.716	24.22	23.208	25.044	23.673	21.654	20.691	22.726	21.306	14.994	15.117
354.5	20.215	22.899	22.597	24.25	23.11	24.973	23.675	21.508	20.633	22.656	21.14	15.032	15.227
355	20.317	22.771	22.481	24.224	22.956	24.785	23.64	21.434	20.647	22.556	21.105	15.062	15.328
355.5	20.367	22.625	22.518	24.169	22.785	24.677	23.567	21.42	20.7	22.526	21.1	15.085	15.38
356	20.474	22.478	22.528	24.069	22.671	24.651	23.592	21.445	20.779	22.54	21.13	15.094	15.346
356.5	20.495	22.343	22.485	24.079	22.815	24.667	23.604	21.435	20.772	22.611	21.125	15.086	15.256
357	20.407	22.426	22.456	24.117	22.881	24.679	23.55	21.336	20.668	22.575	21.037	15.048	15.175
357.5	20.42	22.656	22.54	24.192	22.903	24.727	23.529	21.28	20.56	22.528	20.962	15.029	15.137
358	20.388	22.804	22.701	24.187	22.8	24.685	23.381	21.334	20.464	22.532	20.9	15.021	15.128
358.5	20.251	22.857	22.84	24.132	22.584	24.58	23.323	21.382	20.381	22.476	20.898	15.01	15.096
359	19.951	22.849	22.835	24.166	22.577	24.581	23.326	21.388	20.369	22.418	20.898	15.039	15.071
359.5	19.707	22.741	22.654	24.129	22.61	24.531	23.213	21.273	20.444	22.277	20.847	14.974	15.067
360	19.626	22.602	22.581	24.086	22.629	24.464	23.189	21.155	20.54	22.105	20.767	14.928	15.073
360.5	19.8	22.526	22.621	23.965	22.526	24.399	23.056	21.107	20.608	21.999	20.683	14.928	15.107
361	19.912	22.424	22.644	23.985	22.404	24.331	22.942	21.105	20.572	22.069	20.651	15.022	15.145
361.5	19.887	22.494	22.742	24.156	22.302	24.273	22.918	21.11	20.522	22.197	20.677	15.132	15.152
362	19.868	22.592	22.72	24.324	22.218	24.285	22.939	21.08	20.491	22.352	20.698	15.199	15.212
362.5	19.621	22.515	22.855	24.361	22.226	24.272	23.013	21.052	20.504	22.495	20.799	15.218	15.233
363	19.449	22.338	22.954	24.207	22.178	24.186	23.12	21.07	20.507	22.496	20.88	15.167	15.207
363.5	19.353	22.181	22.978	23.939	22.27	24.133	23.165	20.989	20.5	22.368	20.898	15.133	15.158
364	19.179	22.138	22.813	23.785	22.415	24.034	23.181	20.886	20.457	22.084	20.863	15.091	15.112
364.5	19.108	22.21	22.608	23.778	22.527	24.056	23.226	20.81	20.456	21.852	20.718	15.063	15.142
365	19.102	22.27	22.363	23.795	22.514	24.09	23.102	20.771	20.419	21.711	20.544	15.052	15.235
365.5	19.085	22.126	22.037	23.87	22.438	24.15	23.002	20.786	20.326	21.672	20.47	15.065	15.291
366	18.994	22.063	21.949	23.982	22.398	24.261	22.899	20.77	20.219	21.74	20.421	15.039	15.275
366.5	18.983	22.067	21.923	23.959	22.291	24.185	22.817	20.686	20.147	21.852	20.418	14.98	15.248
367	18.905	22.093	22.19	23.953	22.242	24.102	22.906	20.639	20.208	22.051	20.486	14.949	15.267
367.5	18.917	22.158	22.633	23.968	22.237	23.986	22.952	20.646	20.232	22.258	20.525	14.952	15.343
368	18.899	22.14	22.838	23.986	22.258	23.941	22.976	20.669	20.258	22.296	20.594	15.008	15.399
368.5	18.674	22.045	22.852	24.007	22.338	23.967	22.889	20.625	20.198	22.147	20.663	15.15	15.426
369	18.557	22.089	22.794	24.033	22.372	23.986	22.716	20.53	20.123	21.987	20.654	15.278	15.476
369.5	18.666	22.159	22.883	23.967	22.313	23.907	22.519	20.437	20.115	21.892	20.614	15.398	15.517
370	18.806	22.217	23.012	23.968	22.279	23.831	22.45	20.444	20.196	21.948	20.635	15.508	15.508
370.5	19.072	22.279	23.181	23.972	22.226	23.712	22.542	20.523	20.306	22.046	20.675	15.555	15.522
371	19.205	22.333	23.328	23.896	22.045	23.724	22.67	20.523	20.287	22.025	20.625	15.579	15.485
371.5	19.401	22.502	23.3	23.894	21.956	23.857	22.768	20.507	20.144	21.854	20.557	15.539	15.456
372	19.679	22.7	23.433	23.904	22.055	24.018	22.817	20.469	19.979	21.782	20.466	15.466	15.454
372.5	19.77	22.755	23.473	24.015	22.352	24.27	22.81	20.422	19.902	21.789	20.469	15.44	15.498
373	19.668	22.571	23.415	24.234	22.646	24.427	22.902	20.481	20.004	21.896	20.602	15.436	15.521
373.5	19.577	22.456	23.58	24.314	22.752	24.33	22.901	20.458	20.121	22.056	20.688	15.502	15.627
374	19.89	22.554	23.695	24.343	22.634	24.184	22.881	20.38	20.179	22.046	20.691	15.553	15.726
374.5	20.379	22.756	23.738	24.249	22.442	24.05	22.853	20.368	20.086	22.047	20.69	15.587	15.762
375	20.79	23.251	23.699	24.126	22.411	24.017	22.85	20.307	20.038	21.987	20.715	15.615	15.864
375.5	20.899	23.338	23.519	24.109	22.509	24.051	22.932	20.236	20.015	21.862	20.68	15.615	15.931
376	20.728	23.258	23.31	24.115	22.567	24.06	23.044	20.204	20.041	21.724	20.609	15.614	15.945
376.5	20.636	23.244	23.22	24.303	22.589	24.13	23.167	20.125	20.115	21.542	20.534	15.567	15.89
377	20.702	23.192	23.102	24.498	22.606	24.168	23.381	20.12	20.057	21.437	20.436	15.526	15.827
377.5	20.82	23.339	22.982	24.604	22.517	24.148	23.473	20.169	19.993	21.425	20.379	15.49	15.771
378	21.1	23.525	23.051	24.574	22.532	24.105	23.379	20.192	19.989	21.486	20.349	15.47	15.804
378.5	21.349	23.673	23.273	24.425	22.512	24.048	23.154	20.164	19.981	21.622	20.312	15.458	15.84
379	21.474	23.842	23.458	24.244	22.395	24.005	22.826	20.098	20.105	21.764	20.274	15.549	15.892
379.5	21.565	24.059	23.501	24.195	22.37	24.083	22.637	20.04	20.137	21.87	20.28	15.655	15.952
380	21.48	24.127	23.328	24.26	22.457	24.063	22.615	19.989	20.112	21.999	20.281	15.782	16.044
380.5	21.471	24.066	23.05	24.396	22.586	24.132	22.757	20.039	20.103	22.044	20.311	15.963	16.179
381	21.534	23.911	22.913	24.485	22.669	24.227	22.825	20.172	20.133	22.031	20.47	16.029	16.264
381.5	21.702	23.953	22.858	24.614	22.741	24.272	22.904	20.21	20.21	21.929	20.478	16.091	16.264
382	21.858	24.149	22.948	24.713	22.695	24.24	22.838	20.196	20.141	21.749	20.503	16.175	16.277
382.5	21.955	24.513	22.996	24.598	22.644	24.004	22.68	20.21	20.065	21.666	20.495	16.216	16.343
383	22.211	24.736	23.038	24.517	22.694	23.854	22.733	20.175	19.906	21.636	20.437	16.241	16.512
383.5	22.232	24.551	22.917	24.291	22.599	23.801	22.668	20.167	19.966	21.714	20.572	16.201	16.732
384	22.527	24.498	22.817	24.041	22.457	23.854	22.451	20.038	20.213	21.812	20.647	16.168	16.881
384.5	22.924	24.492	22.784	23.945	22.291	23.977	22.277	19.839	20.416	21.792	20.597	16.155	16.936
385	22.995	24.607	22.657	23.761	22.101	23.963	21.993	19.79	20.574	21.799	20.521	16.216	16.906
385.5	23.032	24.724	22.721	23.67	22.088	23.818	21.936	19.874	20.599	21.767	20.444	16.311	16.893
386	22.741	24.403	22.749	23.669	22.084	23.648	22.084	20.072	20.47	21.815	20.388	16.276	16.81
386.5	22.486	24.174	22.801	23.764	22.13	23.637	22.261	20.232	20.376	21.926	20.445	16.267	16.734
387	22.555	24.092	22.871	23.886	22.171	23.702	22.371	20.151	20.306	21.903	20.412	16.336	16.715
387.5	22.841	24.102	22.892	24.096	22.224	23.802	22.414	19.989	20.34	21.839	20.389	16.398	16.793
388	23.099	24.405	22.68	24.335	22.394	23.816	22.373	19.813	20.356	21.738	20.305	16.518	17.015
388.5	23.246	24.68	22.567	24.531	22.492	23.827	22.211	19.774	20.419	21.757	20.301	16.565	17.182
389	23.39	24.978	22.55	24.703	22.618	24.028	22.181	19.917	20.381	21.911	20.392	16.581	17.216
389.5	23.488	25.076	22.44	24.668	22.577	24.26	22.203	20.059	20.361	22.151	20.489	16.639	17.145
390	23.759	25.052	22.57	24.512	22.444	24.317	22.23	20.033	20.338	22.34	20.67	16.733	17.09
390.5	23.956	24.725	22.467	24.316	22.361	24.22	22.357	19.922	20.288	22.474	20.732	16.845	17.164
391	23.935	24.532	22.403	23.976	22.192	24.033	22.326	19.721	20.193	22.388	20.671	16.877	17.277
391.5	23.74	24.633	22.257	23.766	22.169	23.983	22.269	19.523	20.146	22.184	20.632	16.853	17.334
392	23.407	24.924	22.13	23.833	22.241	24.022	22.232	19.462	20.102	21.999	20.661	16.844	17.372
392.5	23.341	25.23	22.215	23.966	22.332	23.917	22.236	19.537	20.073	21.844	20.671	16.82	17.324
393	23.543	25.411	22.437	24.267	22.326	23.682	22.143	19.711	20.076	21.858	20.636	16.906	17.312
393.5	23.755	25.392	22.746	24.291	22.222	23.44	22.001	19.941	20.155	21.84	20.597	16.962	17.281
394	23.921	25.295	22.96	24.1	21.949	23.279	21.839	19.982	20.229	21.775	20.585	16.845	17.221
394.5	23.753	25.386	22.888	24.083	21.687	23.278	21.654	19.816	20.295	21.718	20.519	16.724	17.308
395	23.504	25.331	22.797	24.025	21.637	23.243	21.584	19.587	20.119	21.53	20.469	16.572	17.401
395.5	23.341	25.1	22.635	23.872	21.562	23.169	21.389	19.51	20.132	21.636	20.483	16.609	17.525
396	23.368	24.746	22.304	23.634	21.662	23.097	21.149	19.537	20.235	21.81	20.571	16.808	17.565
396.5	23.528	24.554	22.11	23.497	21.714	22.915	21.128	19.717	20.342	22.059	20.648	17.009	17.585
397	23.774	24.603	21.78	23.446	21.661	22.906	21.168	19.775	20.445	22.333	20.617	17.14	17.583
397.5	24.009	24.916	21.794	23.411	21.509	22.667	21.252	19.607	20.214	22.38	20.395	17.166	17.605
398	24.139	25.214	21.862	23.492	21.449	22.685	21.273	19.631	20.048	22.437	20.302	17.109	17.558
398.5	24.237	25.294	21.813	23.517	21.583	22.937	21.207	19.67	20.175	22.362	20.517	17.119	17.536
399	24.375	25.343	21.773	23.672	21.914	23.213	21.286	19.943	20.238	22.315	20.673	17.073	17.573
399.5	24.415	25.335	21.667	23.917	22.258	23.453	21.497	20.123	20.251	22.286	20.867	17.113	17.7
400	24.112	25.286	21.437	23.709	21.957	23.107	21.583	19.995	20.184	22.219	20.982	17.233	17.9
400.5	23.852	25.122	21.227	23.441	21.471	22.677	21.666	19.843	20.016	22.369	20.973	17.319	17.914
401	23.652	25.065	21.054	23.092	21.015	22.454	21.525	19.73	19.93	22.513	21.088	17.429	17.763
401.5	23.6	25.244	20.898	22.847	20.841	22.52	21.289	19.784	19.881	22.701	21.251	17.542	17.62
402	23.691	25.348	20.927	22.799	21.14	22.775	21.021	19.832	19.772	22.786	21.33	17.601	17.595
402.5	23.768	25.477	21.109	22.807	21.493	22.808	20.679	19.88	19.812	22.749	21.266	17.635	17.685
403	23.957	25.435	21.407	22.901	21.8	22.75	20.441	19.684	19.794	22.647	21.011	17.576	17.748
403.5	24.166	25.326	21.678	22.9	21.923	22.688	20.232	19.569	19.919	22.684	20.764	17.456	17.707
404	24.399	25.569	21.884	22.964	21.822	22.793	20.276	19.547	20.059	22.753	20.68	17.506	17.648
404.5	24.522	25.825	21.996	23.011	21.568	22.919	20.574	19.584	20.139	22.575	20.556	17.555	17.659
405	24.42	26.112	21.891	22.96	21.425	22.792	20.663	19.691	20.146	22.345	20.488	17.576	17.775
405.5	24.146	26.127	21.5	22.821	21.292	22.502	20.666	19.764	20.1	22.161	20.446	17.646	17.866
406	23.797	25.886	20.923	22.533	21.065	22.07	20.412	19.818	20.11	22.153	20.62	17.63	17.905
406.5	23.483	25.656	20.523	22.386	21.069	21.877	20.306	19.924	20.2	22.282	20.871	17.667	17.965
407	23.389	25.524	20.52	22.321	21.112	21.856	20.531	19.936	20.206	22.27	20.967	17.776	18.046
407.5	23.513	25.631	20.911	22.399	21.29	21.967	20.898	19.788	20.177	22.188	21.005	17.792	18.083
408	23.638	25.897	21.261	22.63	21.433	22.211	21.286	19.53	19.982	22.056	20.91	17.891	17.987
408.5	23.605	25.996	21.488	22.916	21.329	22.414	21.49	19.354	19.885	22.08	20.867	17.844	17.78
409	23.572	26.154	21.674	23.024	21.154	22.586	21.483	19.462	19.847	22.122	20.841	17.725	17.635
409.5	23.463	26.247	21.676	22.882	20.825	22.569	21.185	19.678	19.688	22.114	20.649	17.552	17.668
410	23.268	26.185	21.715	22.46	20.441	22.387	20.997	19.855	19.543	22.177	20.371	17.456	17.818
410.5	23.239	26.16	21.59	22.167	20.099	22.11	20.729	19.971	19.394	22.237	20.438	17.47	17.956
411	23.105	25.958	21.432	22.043	20.088	21.883	20.499	19.954	19.33	22.35	20.553	17.531	18.037
411.5	23.106	25.629	21.459	22.099	20.23	21.721	20.407	19.979	19.348	22.458	20.698	17.642	18.157
412	23.094	25.349	21.446	22.143	20.517	21.569	20.14	19.824	19.354	22.312	20.653	17.683	18.199
412.5	23.187	25.143	21.544	22.22	20.737	21.532	20.022	19.553	19.357	22.15	20.371	17.661	18.11
413	23.517	25.159	21.622	22.294	20.844	21.596	19.908	19.344	19.337	22.005	20.183	17.692	18.019
413.5	23.812	25.375	21.547	22.253	20.963	21.698	19.573	19.298	19.465	22.117	20.309	17.742	17.86
414	23.953	25.667	21.477	22.065	21.002	21.931	19.373	19.434	19.526	22.346	20.481	17.8	17.835
414.5	23.738	25.94	21.21	21.776	20.848	21.982	19.382	19.54	19.507	22.592	20.777	17.773	17.84
415	23.526	26.065	20.91	21.671	20.752	21.908	19.586	19.542	19.411	22.67	20.915	17.675	17.768
415.5	23.424	26.01	20.639	21.819	20.492	21.871	19.895	19.595	19.323	22.588	20.912	17.517	17.756
416	23.474	25.961	20.457	22.084	20.364	21.849	20.123	19.717	19.315	22.512	20.897	17.416	17.805
416.5	23.576	26.044	20.46	22.305	20.306	21.91	20.184	19.885	19.476	22.416	20.869	17.43	17.838
417	23.459	26.22	20.574	22.448	20.381	22.04	20.253	19.745	19.657	22.299	20.752	17.518	17.935
417.5	23.425	26.344	20.875	22.427	20.59	21.999	20.241	19.582	19.902	22.401	20.601	17.686	18.065
418	23.331	26.292	20.955	22.328	20.61	21.741	20.147	19.334	20.066	22.497	20.445	17.756	18.135
418.5	23.208	26.195	20.863	22.083	20.513	21.376	19.949	19.221	20.015	22.659	20.465	17.722	18.223
419	23.119	26.168	20.72	21.95	20.326	21.253	19.829	19.201	19.866	22.81	20.607	17.658	18.227
419.5	23.021	26.205	20.723	21.956	20.358	21.364	19.822	19.271	19.785	22.728	20.678	17.667	18.133
420	22.967	26.368	21.02	21.976	20.615	21.595	19.99	19.382	19.789	22.646	20.524	17.762	18.095
420.5	22.861	26.419	21.351	22.12	20.933	21.769	20.113	19.5	19.912	22.573	20.355	17.78	18.044
421	22.725	26.371	21.345	22.128	21.158	21.81	20.175	19.574	19.876	22.49	20.321	17.89	18.095
421.5	22.623	26.188	21.152	22.062	21.02	21.873	20.129	19.517	19.698	22.269	20.323	17.976	18.164
422	22.734	25.918	21.146	21.971	20.739	22.04	20.098	19.572	19.55	22.139	20.38	18.007	18.184
422.5	22.863	25.695	21.312	21.7	20.582	22.053	20.22	19.639	19.442	22.159	20.237	18.049	18.198
423	22.975	25.691	21.611	21.348	20.591	21.931	20.184	19.757	19.456	22.359	20.116	17.996	18.177
423.5	22.928	25.815	21.664	21.131	20.736	21.765	20.219	19.839	19.57	22.623	20.193	17.992	18.143
424	22.771	26.03	21.48	21.11	20.799	21.457	20.065	19.827	19.532	22.795	20.305	18.063	18.124
424.5	22.683	26.091	21.168	21.264	20.636	21.34	19.899	19.716	19.593	22.755	20.451	18.122	18.1
425	22.666	26.085	20.913	21.487	20.459	21.351	19.929	19.803	19.627	22.811	20.578	18.098	18.189
425.5	22.771	26.133	20.984	21.497	20.34	21.452	19.986	19.99	19.633	22.878	20.74	18.007	18.326
426	22.985	26.35	21.091	21.469	20.328	21.722	20.078	20.107	19.655	22.771	20.764	17.857	18.429
426.5	23.118	26.709	21.355	21.527	20.462	21.843	20.112	20.112	19.675	22.621	20.772	17.722	18.373
427	23.101	26.955	21.498	21.534	20.561	21.733	20.055	19.901	19.68	22.368	20.618	17.735	18.208
427.5	22.916	26.892	21.412	21.572	20.686	21.642	20.054	19.815	19.773	22.214	20.583	17.825	18.101
428	22.724	26.756	21.345	21.52	20.735	21.416	20.128	19.854	19.763	22.284	20.639	17.934	18.051
428.5	22.645	26.527	21.169	21.485	20.675	21.397	20.114	19.929	19.695	22.422	20.674	18.008	18.161
429	22.587	26.266	21.185	21.497	20.637	21.439	20.129	20.009	19.583	22.544	20.637	17.996	18.199
429.5	22.526	26.276	21.375	21.511	20.558	21.495	20.094	19.979	19.504	22.604	20.533	18.013	18.267
430	22.582	26.371	21.502	21.548	20.555	21.563	20.086	20.018	19.462	22.566	20.399	18.051	18.276
430.5	22.655	26.519	21.587	21.618	20.535	21.506	20.077	20.038	19.565	22.769	20.253	18.119	18.257
431	22.751	26.594	21.614	21.661	20.535	21.603	19.959	20.038	19.629	22.808	20.191	18.214	18.292
431.5	22.828	26.596	21.722	21.544	20.568	21.689	20.028	20.021	19.639	22.788	20.172	18.259	18.241
432	22.817	26.49	21.983	21.437	20.609	21.74	20.116	19.988	19.573	22.596	20.245	18.313	18.234
432.5	22.718	26.428	22.118	21.278	20.726	21.743	20.195	19.98	19.42	22.364	20.341	18.317	18.266
433	22.644	26.42	22.001	21.233	20.686	21.58	20.271	19.923	19.248	22.266	20.388	18.334	18.268
433.5	22.532	26.326	21.768	21.376	20.631	21.532	20.138	19.888	19.123	22.349	20.46	18.282	18.256
434	22.386	26.318	21.53	21.488	20.607	21.463	20.14	19.848	19.122	22.518	20.556	18.254	18.19
434.5	22.493	26.441	21.463	21.7	20.556	21.47	20.305	19.775	19.179	22.623	20.568	18.14	18.082
435	22.581	26.392	21.408	21.781	20.584	21.412	20.459	19.792	19.356	22.676	20.555	18.113	18.061
435.5	22.73	26.36	21.374	21.677	20.514	21.285	20.44	19.782	19.483	22.573	20.361	18.124	18.085
436	22.829	26.236	21.397	21.683	20.625	21.359	20.313	19.817	19.441	22.51	20.246	18.125	18.146
436.5	22.721	26.18	21.455	21.652	20.799	21.445	20.102	19.888	19.4	22.489	20.207	18.159	18.176
437	22.597	26.381	21.575	21.71	20.897	21.53	20.026	19.842	19.316	22.518	20.161	18.117	18.193
437.5	22.467	26.521	21.648	21.716	20.971	21.613	20.029	19.669	19.241	22.46	20.148	18.051	18.218
438	22.515	26.715	21.691	21.526	21.01	21.492	19.909	19.542	19.33	22.303	20.087	18.013	18.166
438.5	22.647	26.856	21.681	21.378	21.182	21.488	19.889	19.59	19.436	22.135	20.134	17.897	18.094
439	22.71	26.876	21.719	21.265	21.355	21.478	19.889	19.747	19.492	21.967	20.18	17.806	18.01
439.5	22.616	26.924	21.706	21.338	21.46	21.515	20.134	19.967	19.531	21.951	20.227	17.788	18.008
440	22.474	26.922	21.746	21.439	21.4	21.485	20.192	20.036	19.459	22.072	20.234	17.726	18.108
440.5	22.371	26.837	21.759	21.498	21.381	21.49	20.066	20.02	19.371	22.198	20.265	17.78	18.253
441	22.385	26.792	21.72	21.319	21.402	21.431	19.802	20.011	19.382	22.322	20.303	17.852	18.272
441.5	22.389	26.753	21.669	21.136	21.519	21.433	19.571	19.92	19.294	22.293	20.226	17.99	18.225
442	22.342	26.715	21.676	21.042	21.718	21.505	19.423	19.866	19.299	22.137	20.127	18.109	18.147
442.5	22.273	26.75	21.768	21.042	21.901	21.44	19.393	19.891	19.215	22.091	20.045	18.084	18.126
443	22.26	26.845	21.909	21.226	22.029	21.358	19.487	20.002	19.195	22.111	20.088	18.075	18.069
443.5	22.265	26.855	22.084	21.294	22.104	21.19	19.695	20.053	19.261	22.063	20.201	18.012	18.08
444	22.323	26.918	22.11	21.32	22.114	21.159	19.946	20.019	19.348	22.072	20.299	18.034	18.121
444.5	22.349	26.973	22.076	21.276	22.239	21.32	20.096	19.899	19.442	22.037	20.347	18.004	18.202
445	22.347	26.978	22.066	21.211	22.465	21.484	20.077	19.803	19.349	22.036	20.367	17.976	18.332
445.5	22.376	27.095	22.074	21.219	22.79	21.511	20.076	19.846	19.239	22.193	20.394	17.984	18.352
446	22.363	27.143	22.129	21.261	23.077	21.454	20.016	19.858	19.144	22.261	20.378	18.05	18.333
446.5	22.385	27.133	22.217	21.237	23.231	21.346	19.925	19.92	19.148	22.31	20.433	18.123	18.273
447	22.478	27.174	22.253	21.218	23.252	21.334	19.868	19.929	19.258	22.323	20.346	18.097	18.241
447.5	22.468	27.058	22.298	21.231	23.297	21.334	19.941	20.028	19.325	22.338	20.319	18.047	18.232
448	22.395	26.975	22.325	21.376	23.556	21.305	20.057	20.132	19.427	22.319	20.388	17.908	18.25
448.5	22.25	26.956	22.375	21.559	23.859	21.255	20.156	20.163	19.496	22.372	20.497	17.869	18.321
449	22.071	26.918	22.384	21.661	24.12	21.167	20.193	20.163	19.565	22.317	20.579	17.891	18.324
449.5	22	27.103	22.328	21.636	24.306	21.181	20.217	20.091	19.553	22.179	20.503	17.935	18.274
450	21.984	27.291	22.275	21.574	24.436	21.247	20.25	20.056	19.468	22.089	20.363	18.011	18.22
450.5	22.027	27.487	22.331	21.513	24.668	21.349	20.412	20.06	19.446	22.099	20.3	18.011	18.18
451	22.106	27.538	22.351	21.596	24.973	21.444	20.471	19.999	19.419	22.145	20.367	18.002	18.2
451.5	22.191	27.559	22.39	21.592	25.057	21.356	20.438	19.971	19.553	22.301	20.467	18.008	18.278
452	22.364	27.619	22.419	21.513	25.141	21.258	20.336	19.919	19.692	22.429	20.468	18.078	18.359
452.5	22.565	27.78	22.494	21.366	25.191	21.176	20.163	19.962	19.728	22.582	20.382	18.156	18.422
453	22.678	27.87	22.625	21.204	25.273	21.147	20.138	20.015	19.647	22.64	20.171	18.243	18.462
453.5	22.64	27.756	22.6	21.282	25.427	21.138	20.165	20.065	19.469	22.605	20.039	18.212	18.461
454	22.47	27.563	22.546	21.365	25.5	21.131	20.193	20.015	19.313	22.493	19.983	18.267	18.542
454.5	22.366	27.561	22.564	21.457	25.597	21.125	20.119	19.927	19.299	22.469	20.119	18.325	18.597
455	22.451	27.745	22.731	21.403	25.697	21.12	19.938	19.924	19.388	22.506	20.269	18.384	18.689
455.5	22.601	27.925	22.858	21.287	25.702	21.105	19.794	19.9	19.458	22.451	20.254	18.353	18.67
456	22.689	27.968	22.913	21.217	25.644	21.036	19.722	19.928	19.519	22.364	20.239	18.283	18.589
456.5	22.724	27.91	22.9	21.231	25.565	20.995	19.732	19.932	19.53	22.285	20.2	18.245	18.528
457	22.752	27.99	22.861	21.265	25.47	21.027	19.801	19.973	19.528	22.296	20.264	18.294	18.499
457.5	22.738	28.134	22.918	21.294	25.297	21.06	19.891	20.013	19.53	22.359	20.405	18.398	18.533
458	22.714	28.174	22.922	21.323	25.017	21.076	20.029	20.026	19.507	22.4	20.526	18.419	18.524
458.5	22.757	28.248	22.996	21.348	24.788	21.183	20.243	19.96	19.557	22.274	20.617	18.432	18.512
459	22.847	28.346	23.121	21.425	24.754	21.283	20.496	19.961	19.664	22.185	20.661	18.331	18.493
459.5	22.991	28.513	23.278	21.397	24.744	21.42	20.579	20.049	19.698	22.131	20.598	18.236	18.544
460	23.133	28.644	23.476	21.321	24.727	21.439	20.516	20.149	19.674	22.255	20.459	18.151	18.628
460.5	23.159	28.496	23.526	21.333	24.69	21.362	20.406	20.305	19.579	22.426	20.453	18.18	18.703
461	23.188	28.354	23.434	21.467	24.636	21.34	20.34	20.319	19.574	22.579	20.472	18.246	18.735
461.5	23.148	28.188	23.316	21.621	24.61	21.317	20.39	20.257	19.625	22.588	20.556	18.296	18.724
462	23.091	28.175	23.206	21.798	24.509	21.432	20.423	20.146	19.672	22.428	20.592	18.285	18.688
462.5	23.028	28.213	23.124	21.844	24.403	21.642	20.366	20.043	19.663	22.275	20.531	18.242	18.625
463	23.018	28.247	23.078	21.834	24.373	21.826	20.318	19.993	19.595	22.186	20.5	18.235	18.589
463.5	23.107	28.298	23.163	21.77	24.369	21.834	20.306	19.986	19.517	22.25	20.423	18.233	18.576
464	23.228	28.394	23.234	21.781	24.29	21.717	20.339	19.94	19.435	22.291	20.356	18.233	18.623
464.5	23.272	28.467	23.288	21.851	24.219	21.584	20.433	19.942	19.449	22.27	20.371	18.219	18.645
465	23.236	28.614	23.223	21.974	24.097	21.504	20.5	19.919	19.509	22.175	20.372	18.277	18.701
465.5	23.109	28.661	23.15	22.018	24.01	21.541	20.552	20.004	19.664	22.21	20.458	18.344	18.824
466	22.994	28.625	23.18	21.935	23.966	21.563	20.555	20.116	19.748	22.276	20.505	18.414	18.932
466.5	23.034	28.504	23.193	21.865	23.936	21.599	20.524	20.225	19.773	22.331	20.492	18.444	18.982
467	23.226	28.564	23.221	21.787	23.861	21.62	20.465	20.255	19.659	22.314	20.484	18.469	18.971
467.5	23.524	28.793	23.222	21.802	23.742	21.652	20.462	20.242	19.537	22.207	20.463	18.521	18.929
468	23.662	28.98	23.23	21.878	23.577	21.65	20.56	20.136	19.421	22.13	20.484	18.5	18.873
468.5	23.737	29.094	23.364	21.891	23.47	21.568	20.735	20.026	19.357	22.1	20.485	18.52	18.817
469	23.725	29.058	23.477	21.898	23.437	21.516	20.916	19.942	19.426	22.183	20.611	18.511	18.78
469.5	23.831	29.174	23.723	21.844	23.467	21.444	20.993	19.809	19.495	22.292	20.613	18.515	18.815
470	23.929	29.472	23.873	21.818	23.523	21.548	20.985	19.784	19.577	22.299	20.583	18.523	18.862
470.5	23.865	29.518	23.923	21.863	23.515	21.627	20.918	19.735	19.566	22.209	20.514	18.491	18.855
471	23.841	29.479	23.896	21.92	23.478	21.649	20.867	19.733	19.467	22.084	20.461	18.475	18.843
471.5	23.875	29.434	23.778	22.052	23.395	21.652	20.904	19.806	19.438	22.022	20.536	18.473	18.869
472	23.973	29.476	23.754	22.063	23.254	21.596	20.921	19.857	19.402	22.084	20.617	18.474	18.936
472.5	24.139	29.615	23.866	21.966	23.069	21.536	20.928	19.984	19.504	22.208	20.662	18.516	18.952
473	24.073	29.592	24.018	21.869	22.916	21.489	20.852	20.057	19.566	22.431	20.755	18.585	18.899
473.5	23.968	29.509	24.106	21.823	22.826	21.398	20.742	20.084	19.562	22.451	20.747	18.616	18.875
474	23.896	29.523	24.062	21.873	22.869	21.451	20.678	20.142	19.6	22.417	20.691	18.6	18.859
474.5	23.735	29.582	23.965	21.854	22.867	21.503	20.664	20.122	19.633	22.299	20.551	18.536	18.899
475	23.727	29.699	23.925	21.855	22.843	21.61	20.687	20.141	19.703	22.2	20.412	18.497	18.872
475.5	23.76	29.717	24.01	21.977	22.841	21.739	20.676	20.142	19.815	22.223	20.426	18.484	18.842
476	23.783	29.616	24.023	22.117	22.727	21.789	20.718	20.013	19.755	22.106	20.425	18.488	18.911
476.5	23.805	29.519	24.019	22.133	22.58	21.783	20.747	19.962	19.668	22.089	20.472	18.475	18.947
477	23.784	29.399	24.024	21.933	22.415	21.679	20.815	19.927	19.546	22.134	20.586	18.551	19.036
477.5	23.771	29.338	24.029	21.733	22.314	21.645	20.784	19.958	19.444	22.23	20.661	18.643	18.993
478	23.886	29.379	24.031	21.682	22.24	21.647	20.656	20.037	19.463	22.313	20.714	18.728	18.918
478.5	23.984	29.524	24.008	21.746	22.181	21.651	20.542	20.024	19.497	22.288	20.586	18.72	18.903
479	24.059	29.647	24.029	21.848	22.069	21.599	20.493	19.998	19.552	22.254	20.427	18.614	18.935
479.5	23.992	29.78	24.125	21.822	22	21.449	20.584	19.996	19.542	22.219	20.364	18.528	18.974
480	23.846	29.799	24.211	21.79	21.968	21.369	20.631	20.027	19.581	22.265	20.461	18.504	18.975
480.5	23.802	29.706	24.192	21.8	21.99	21.407	20.745	20.089	19.614	22.323	20.614	18.551	18.967
481	23.79	29.691	24.203	21.819	22.001	21.464	20.769	20.104	19.638	22.313	20.656	18.612	18.968
481.5	23.787	29.675	24.184	21.866	21.983	21.478	20.798	20.074	19.664	22.267	20.668	18.658	19.022
482	23.783	29.746	24.242	21.86	21.917	21.456	20.847	20.013	19.65	22.2	20.636	18.669	19.019
482.5	23.738	29.903	24.383	21.744	21.829	21.4	20.842	19.979	19.606	22.133	20.65	18.686	19.027
483	23.742	29.98	24.478	21.706	21.712	21.384	20.823	19.963	19.56	22.127	20.614	18.693	19.01
483.5	23.818	30.111	24.575	21.769	21.599	21.415	20.867	20.037	19.52	22.158	20.585	18.731	19.045
484	23.874	30.205	24.562	21.905	21.516	21.499	20.908	20.115	19.468	22.208	20.621	18.742	19.069
484.5	23.985	30.279	24.529	22.051	21.519	21.587	20.923	20.174	19.441	22.25	20.736	18.695	19.056
485	24.077	30.393	24.548	22.071	21.57	21.698	20.959	20.154	19.434	22.288	20.834	18.643	19.072
485.5	24.082	30.382	24.526	22.009	21.654	21.745	20.948	20.127	19.458	22.242	20.796	18.591	19.068
486	24.057	30.377	24.539	22.014	21.653	21.721	20.993	20.165	19.532	22.246	20.713	18.646	19.174
486.5	23.992	30.302	24.493	22.027	21.653	21.655	20.972	20.242	19.558	22.244	20.617	18.697	19.245
487	23.961	30.304	24.521	22.085	21.693	21.6	20.947	20.349	19.571	22.215	20.642	18.759	19.263
487.5	23.938	30.323	24.604	22.102	21.732	21.581	21.01	20.365	19.624	22.151	20.721	18.809	19.25
488	24.008	30.35	24.652	22.137	21.794	21.683	21.177	20.296	19.656	22.146	20.802	18.895	19.217
488.5	24.065	30.425	24.758	22.241	21.844	21.828	21.433	20.211	19.664	22.163	20.871	18.96	19.227
489	24.161	30.487	24.83	22.337	21.888	21.895	21.513	20.251	19.673	22.237	20.936	19.022	19.239
489.5	24.265	30.723	24.934	22.444	22.003	21.962	21.53	20.355	19.682	22.355	21.019	19.04	19.272
490	24.387	30.868	25.048	22.44	22.128	21.983	21.468	20.457	19.727	22.402	21.154	19.047	19.314
490.5	24.556	31.054	25.188	22.472	22.172	22.045	21.475	20.424	19.754	22.421	21.194	19.022	19.347
491	24.663	31.158	25.24	22.482	22.166	22.119	21.524	20.379	19.787	22.431	21.227	19.009	19.437
491.5	24.709	31.129	25.282	22.537	22.112	22.14	21.593	20.371	19.873	22.348	21.215	18.996	19.494
492	24.814	31.11	25.312	22.583	22.129	22.198	21.706	20.432	19.988	22.353	21.258	19.035	19.551
492.5	24.927	31.114	25.353	22.637	22.204	22.219	21.825	20.53	20.042	22.451	21.369	19.108	19.548
493	25.111	31.253	25.505	22.665	22.27	22.286	21.923	20.535	20.067	22.581	21.456	19.152	19.51
493.5	25.239	31.465	25.704	22.712	22.332	22.256	21.993	20.465	20.029	22.721	21.526	19.21	19.523
494	25.323	31.691	25.869	22.753	22.34	22.206	21.974	20.366	19.955	22.704	21.563	19.264	19.594
494.5	25.387	31.853	26.03	22.789	22.35	22.227	21.962	20.399	19.957	22.663	21.63	19.37	19.737
495	25.478	31.971	26.059	22.867	22.469	22.303	22.007	20.573	19.95	22.614	21.696	19.5	19.88
495.5	25.616	32.071	26.099	22.974	22.615	22.449	22.047	20.765	19.989	22.657	21.777	19.587	19.927
496	25.788	32.166	26.209	23.057	22.763	22.555	22.152	20.829	20.058	22.777	21.866	19.646	19.97
496.5	25.994	32.284	26.349	23.115	22.851	22.621	22.267	20.773	20.164	22.853	21.953	19.69	19.992
497	26.255	32.422	26.543	23.143	22.883	22.763	22.38	20.724	20.367	22.93	22.084	19.732	20.109
497.5	26.501	32.583	26.724	23.218	22.928	22.84	22.507	20.787	20.587	23.007	22.162	19.795	20.235
498	26.694	32.757	26.916	23.406	23.063	22.924	22.611	20.913	20.718	23.108	22.292	19.87	20.324
498.5	26.783	32.969	27.121	23.627	23.185	22.963	22.681	21.099	20.806	23.251	22.418	19.98	20.418
499	26.826	33.111	27.251	23.751	23.259	22.977	22.812	21.118	20.825	23.317	22.561	20.093	20.51
499.5	26.946	33.352	27.41	23.868	23.323	23.051	22.966	21.122	20.869	23.358	22.677	20.193	20.531
500	27.197	33.583	27.622	23.921	23.352	23.168	23.105	21.137	20.949	23.444	22.759	20.281	20.597
500.5	27.516	33.799	27.85	24.01	23.448	23.269	23.204	21.167	21.101	23.583	22.908	20.32	20.646
501	27.812	33.954	28.098	24.204	23.683	23.434	23.296	21.241	21.284	23.69	23.054	20.345	20.739
501.5	28.108	34.12	28.292	24.453	23.963	23.602	23.435	21.306	21.454	23.834	23.235	20.364	20.845
502	28.401	34.429	28.518	24.76	24.249	23.735	23.656	21.376	21.512	23.926	23.391	20.436	20.896
502.5	28.746	34.753	28.727	24.986	24.517	23.85	23.84	21.494	21.542	24.024	23.53	20.561	20.956
503	29.032	34.989	28.943	25.157	24.659	23.962	23.989	21.62	21.61	24.178	23.741	20.692	21.065
503.5	29.166	35.164	29.127	25.269	24.798	24.032	24.17	21.771	21.745	24.342	23.879	20.786	21.166
504	29.296	35.333	29.364	25.488	24.982	24.216	24.415	21.941	21.937	24.546	24.015	20.896	21.316
504.5	29.535	35.517	29.591	25.743	25.233	24.461	24.545	22.02	22.109	24.735	24.15	21.008	21.434
505	29.892	35.737	29.828	25.976	25.468	24.65	24.659	22.077	22.244	24.861	24.248	21.126	21.556
505.5	30.323	35.902	30.077	26.17	25.688	24.775	24.736	22.074	22.379	24.924	24.392	21.209	21.669
506	30.725	36.226	30.341	26.294	25.882	24.821	24.928	22.12	22.515	25.009	24.553	21.293	21.761
506.5	31.119	36.563	30.587	26.466	26.105	24.815	25.176	22.228	22.703	25.167	24.772	21.433	21.847
507	31.485	36.828	30.785	26.671	26.377	24.969	25.359	22.31	22.911	25.355	25.034	21.603	21.97
507.5	31.848	37.007	30.949	26.931	26.633	25.137	25.598	22.391	23.093	25.57	25.262	21.772	22.106
508	32.197	37.153	31.116	27.137	26.886	25.352	25.787	22.458	23.252	25.73	25.515	21.876	22.283
508.5	32.582	37.395	31.375	27.363	27.147	25.501	26.045	22.595	23.472	25.92	25.766	21.941	22.409
509	32.996	37.682	31.67	27.541	27.348	25.636	26.213	22.839	23.791	26.132	26.065	22.023	22.541
509.5	33.488	37.969	32.031	27.837	27.53	25.804	26.365	23.107	24.083	26.353	26.261	22.127	22.654
510	33.976	38.233	32.342	28.192	27.755	26.096	26.625	23.347	24.382	26.595	26.401	22.211	22.734
510.5	34.453	38.523	32.651	28.571	28.019	26.366	26.919	23.508	24.597	26.788	26.569	22.306	22.814
511	34.787	38.8	32.948	28.923	28.34	26.641	27.266	23.642	24.801	27.015	26.776	22.421	22.958
511.5	35.184	39.087	33.252	29.253	28.678	26.872	27.507	23.813	25.048	27.194	27.058	22.611	23.173
512	35.64	39.397	33.565	29.593	28.984	27.081	27.7	23.975	25.236	27.412	27.375	22.802	23.385
512.5	36.253	39.688	33.833	29.949	29.237	27.263	27.886	24.165	25.478	27.71	27.645	22.998	23.564
513	36.858	39.963	34.14	30.254	29.461	27.532	28.121	24.301	25.725	27.949	27.945	23.114	23.693
513.5	37.302	40.182	34.359	30.569	29.792	27.85	28.429	24.51	25.981	28.18	28.199	23.261	23.823
514	37.683	40.345	34.569	30.89	30.138	28.208	28.743	24.68	26.261	28.41	28.475	23.353	23.98
514.5	38.098	40.592	34.796	31.258	30.494	28.447	29.062	24.891	26.552	28.609	28.788	23.458	24.115
515	38.62	40.842	35.105	31.692	30.805	28.591	29.307	25.105	26.858	28.856	29.049	23.592	24.257
515.5	39.134	41.159	35.501	32.09	31.096	28.823	29.511	25.254	27.191	29.051	29.289	23.735	24.382
516	39.532	41.455	35.776	32.49	31.442	29.143	29.694	25.366	27.493	29.226	29.406	23.908	24.545
516.5	39.886	41.694	35.962	32.813	31.731	29.5	29.917	25.471	27.89	29.546	29.539	24.048	24.71
517	40.373	41.985	36.17	33.112	32.011	29.831	30.221	25.7	28.26	29.908	29.752	24.193	24.906
517.5	40.888	42.291	36.372	33.441	32.346	30.095	30.543	25.93	28.573	30.242	29.98	24.358	25.069
518	41.443	42.531	36.646	33.763	32.686	30.305	30.896	26.147	28.879	30.56	30.294	24.562	25.194
518.5	41.917	42.678	36.932	34.112	33.043	30.491	31.221	26.288	29.163	30.824	30.487	24.755	25.318
519	42.375	42.797	37.214	34.541	33.31	30.723	31.443	26.469	29.523	31.155	30.757	24.879	25.442
519.5	42.873	42.988	37.547	34.941	33.561	31.036	31.624	26.71	29.797	31.428	30.983	24.967	25.584
520	43.359	43.241	37.794	35.401	33.818	31.352	31.759	26.961	30.061	31.666	31.296	25.055	25.732
520.5	43.879	43.556	38.082	35.737	34.058	31.561	31.925	27.285	30.36	31.93	31.548	25.166	25.898
521	44.367	43.817	38.312	36.089	34.359	31.743	32.205	27.632	30.791	32.174	31.796	25.348	26.113
521.5	44.832	44.134	38.605	36.461	34.621	31.943	32.552	27.921	31.237	32.436	32.021	25.529	26.304
522	45.261	44.361	38.883	36.826	34.902	32.214	32.897	28.124	31.553	32.646	32.288	25.706	26.451
522.5	45.643	44.65	39.074	37.098	35.137	32.452	33.221	28.252	31.835	32.925	32.555	25.805	26.489
523	46.051	44.815	39.324	37.337	35.346	32.655	33.449	28.361	32.036	33.214	32.784	25.914	26.535
523.5	46.457	44.964	39.481	37.61	35.611	32.953	33.615	28.493	32.291	33.447	32.933	26.06	26.606
524	46.863	45.084	39.704	37.928	35.884	33.276	33.807	28.658	32.615	33.711	32.953	26.208	26.711
524.5	47.235	45.271	39.939	38.36	36.152	33.661	34.008	28.903	33.036	34.021	33.038	26.307	26.803
525	47.639	45.595	40.131	38.703	36.392	33.934	34.283	29.17	33.4	34.398	33.225	26.374	26.895
525.5	48.062	45.831	40.323	39.052	36.579	34.115	34.515	29.358	33.706	34.697	33.473	26.472	27.021
526	48.411	45.978	40.454	39.43	36.806	34.348	34.753	29.472	33.948	34.922	33.755	26.62	27.162
526.5	48.694	46.091	40.555	39.786	37.076	34.574	34.997	29.579	34.173	35.079	33.917	26.784	27.303
527	48.975	46.176	40.67	40.083	37.252	34.712	35.218	29.837	34.374	35.249	34.069	26.874	27.413
527.5	49.267	46.266	40.774	40.367	37.415	34.885	35.382	30.146	34.544	35.451	34.227	26.929	27.48
528	49.622	46.328	40.901	40.561	37.565	35.111	35.463	30.414	34.692	35.669	34.31	26.974	27.536
528.5	49.925	46.508	41.025	40.733	37.764	35.39	35.565	30.564	34.905	35.889	34.396	27.032	27.571
529	50.158	46.733	41.233	41.009	38.072	35.715	35.72	30.651	35.092	36.151	34.52	27.19	27.686
529.5	50.445	46.92	41.401	41.303	38.344	35.94	35.876	30.677	35.227	36.294	34.634	27.336	27.815
530	50.611	47.046	41.501	41.662	38.515	36.12	36.149	30.782	35.425	36.425	34.718	27.433	27.917
530.5	50.839	47.193	41.639	41.874	38.605	36.248	36.39	30.95	35.604	36.46	34.806	27.441	28.002
531	51.166	47.427	41.886	41.992	38.634	36.379	36.604	31.219	35.783	36.511	34.876	27.431	28.043
531.5	51.547	47.644	42.217	42.181	38.732	36.488	36.708	31.535	35.923	36.664	35.074	27.461	28.105
532	51.844	47.767	42.426	42.468	38.86	36.63	36.709	31.664	36.08	36.867	35.253	27.526	28.084
532.5	52.028	47.869	42.52	42.76	39.001	36.788	36.87	31.774	36.282	37.093	35.334	27.561	28.032
533	52.231	48.015	42.602	42.985	39.177	36.964	37.062	31.841	36.492	37.251	35.368	27.565	28.026
533.5	52.436	48.157	42.683	43.183	39.322	37.106	37.201	31.925	36.6	37.408	35.342	27.597	28.069
534	52.75	48.272	42.955	43.414	39.44	37.197	37.217	32.019	36.656	37.593	35.343	27.669	28.163
534.5	52.995	48.384	43.201	43.571	39.624	37.302	37.222	32.095	36.734	37.818	35.441	27.752	28.232
535	53.302	48.589	43.366	43.707	39.881	37.568	37.232	32.224	36.901	38.01	35.642	27.78	28.271
535.5	53.623	48.802	43.444	43.909	40.184	37.805	37.349	32.377	37.134	38.087	35.835	27.807	28.352
536	53.783	48.789	43.326	44.041	40.386	37.962	37.448	32.487	37.22	38.106	35.965	27.867	28.447
536.5	53.905	48.711	43.401	44.183	40.434	38.042	37.667	32.51	37.238	38.156	35.987	27.937	28.564
537	53.913	48.861	43.562	44.243	40.474	38.167	37.998	32.582	37.206	38.303	36.017	27.973	28.635
537.5	54.002	49.107	43.731	44.406	40.523	38.368	38.193	32.743	37.29	38.471	36.146	28.043	28.717
538	54.027	49.339	43.772	44.684	40.581	38.619	38.288	32.986	37.398	38.546	36.233	28.153	28.713
538.5	54.142	49.33	43.725	44.866	40.624	38.819	38.24	33.129	37.455	38.514	36.301	28.312	28.691
539	54.324	49.356	43.817	44.946	40.772	39.016	38.266	33.119	37.574	38.488	36.322	28.414	28.693
539.5	54.509	49.465	43.943	44.914	40.861	39.072	38.236	33.118	37.727	38.576	36.38	28.46	28.746
540	54.727	49.732	44.156	44.932	41.005	39.107	38.28	33.194	37.946	38.8	36.517	28.485	28.835
540.5	54.871	49.869	44.296	45.012	41.144	39.175	38.257	33.284	38.045	38.929	36.582	28.493	28.923
541	55.014	49.964	44.46	45.184	41.32	39.243	38.367	33.256	37.983	38.927	36.508	28.47	28.902
541.5	55.204	50.018	44.536	45.422	41.55	39.363	38.459	33.188	37.941	38.89	36.433	28.449	28.909
542	55.339	50.076	44.566	45.544	41.624	39.471	38.535	33.217	38.025	38.957	36.433	28.425	28.916
542.5	55.486	50.22	44.629	45.598	41.603	39.676	38.591	33.339	38.181	39.144	36.544	28.401	28.93
543	55.582	50.376	44.685	45.643	41.652	39.861	38.646	33.513	38.273	39.357	36.671	28.337	28.93
543.5	55.689	50.47	44.718	45.77	41.71	40.018	38.78	33.709	38.259	39.45	36.729	28.306	28.939
544	55.829	50.528	44.733	45.868	41.766	40.101	38.912	33.833	38.18	39.449	36.782	28.375	28.982
544.5	55.986	50.509	44.801	45.98	41.78	40.151	39.03	33.811	38.046	39.373	36.819	28.515	29.033
545	56.108	50.569	44.878	46.061	41.833	40.247	39.093	33.823	37.998	39.415	36.861	28.613	29.083
545.5	56.16	50.663	44.896	46.202	41.928	40.314	39.2	33.837	38.028	39.563	36.845	28.595	29.068
546	56.212	50.825	44.908	46.309	42.031	40.346	39.276	33.976	38.187	39.722	36.789	28.528	29.115
546.5	56.269	51.036	45.089	46.385	42.101	40.422	39.303	34.14	38.393	39.849	36.812	28.511	29.187
547	56.342	51.249	45.372	46.459	42.174	40.512	39.296	34.257	38.436	39.93	36.833	28.594	29.243
547.5	56.452	51.371	45.665	46.574	42.314	40.714	39.357	34.347	38.442	39.897	36.912	28.699	29.281
548	56.583	51.468	45.739	46.709	42.431	40.905	39.445	34.35	38.372	39.791	36.899	28.759	29.259
548.5	56.743	51.486	45.71	46.8	42.561	41.147	39.481	34.277	38.267	39.652	36.88	28.783	29.268
549	56.917	51.537	45.675	46.938	42.552	41.282	39.402	34.305	38.236	39.713	36.945	28.812	29.286
549.5	57.017	51.514	45.739	46.985	42.519	41.337	39.4	34.33	38.271	39.835	36.98	28.835	29.297
550	57.084	51.534	45.847	47.046	42.556	41.333	39.549	34.364	38.459	39.971	37.061	28.865	29.316
550.5	57.084	51.579	45.904	47.026	42.627	41.352	39.7	34.377	38.645	40.039	37.051	28.931	29.282
551	57.032	51.685	45.928	47.008	42.722	41.447	39.753	34.404	38.709	40.015	37.015	28.992	29.245
551.5	57.023	51.716	45.993	47.017	42.692	41.479	39.759	34.59	38.743	40.075	37.11	29.01	29.24
552	57.031	51.794	46.177	47.107	42.673	41.479	39.787	34.832	38.79	40.088	37.286	28.976	29.302
552.5	57.128	51.85	46.197	47.301	42.735	41.493	39.891	34.999	38.872	40.212	37.454	28.939	29.385
553	57.162	51.96	46.111	47.552	42.805	41.65	39.944	35.021	38.86	40.252	37.514	28.957	29.415
553.5	57.17	51.955	46.024	47.722	42.843	41.792	39.927	34.993	38.732	40.261	37.522	28.959	29.402
554	57.211	52.035	45.98	47.798	42.933	41.936	39.873	34.988	38.607	40.228	37.523	28.916	29.363
554.5	57.381	52.136	46.205	47.799	43.076	42.063	39.894	35.005	38.523	40.158	37.481	28.892	29.394
555	57.496	52.251	46.37	47.85	43.268	42.162	40.02	35.048	38.58	40.175	37.392	28.939	29.457
555.5	57.488	52.303	46.568	47.951	43.309	42.338	40.189	34.996	38.639	40.188	37.349	29.032	29.506
556	57.501	52.33	46.716	48.044	43.285	42.384	40.339	34.968	38.701	40.332	37.414	29.079	29.529
556.5	57.594	52.365	46.743	48.088	43.336	42.426	40.394	34.852	38.55	40.357	37.387	29.055	29.522
557	57.819	52.463	46.709	48.163	43.4	42.467	40.374	34.766	38.384	40.329	37.341	29.056	29.515
557.5	57.962	52.516	46.689	48.241	43.492	42.567	40.317	34.782	38.219	40.196	37.247	29.054	29.495
558	57.935	52.55	46.688	48.359	43.482	42.712	40.32	34.797	38.186	40.114	37.278	29.063	29.458
558.5	57.976	52.602	46.68	48.401	43.37	42.801	40.429	34.84	38.206	40.201	37.276	29.009	29.428
559	58.016	52.807	46.641	48.35	43.281	42.873	40.577	34.885	38.254	40.288	37.312	29.045	29.473
559.5	58.173	53.029	46.687	48.292	43.193	42.93	40.725	34.995	38.328	40.404	37.417	29.093	29.528
560	58.253	53.133	46.795	48.26	43.208	43.013	40.696	35.12	38.31	40.385	37.446	29.117	29.504
560.5	58.268	53.047	46.899	48.332	43.266	43.104	40.609	35.19	38.243	40.335	37.448	29.056	29.416
561	58.19	52.936	46.856	48.421	43.394	43.212	40.567	35.135	38.101	40.233	37.336	28.913	29.272
561.5	58.026	52.936	46.846	48.502	43.48	43.324	40.49	35.064	38.114	40.184	37.281	28.861	29.206
562	57.878	53.08	46.819	48.549	43.554	43.335	40.546	35.022	38.025	40.119	37.2	28.868	29.24
562.5	57.858	53.255	46.869	48.544	43.528	43.282	40.597	35.031	37.928	40.14	37.122	28.925	29.302
563	57.97	53.392	46.942	48.494	43.461	43.166	40.632	35.042	37.714	40.102	37.023	28.914	29.359
563.5	58.225	53.446	46.986	48.5	43.397	43.152	40.645	34.993	37.477	39.957	36.973	28.867	29.42
564	58.3	53.401	47.006	48.561	43.405	43.132	40.532	34.883	37.333	39.821	36.949	28.826	29.44
564.5	58.304	53.417	46.871	48.702	43.431	43.171	40.5	34.836	37.184	39.685	36.907	28.81	29.438
565	58.247	53.473	46.786	48.735	43.405	43.269	40.487	34.876	37.165	39.761	36.878	28.804	29.343
565.5	58.154	53.502	46.779	48.766	43.468	43.538	40.557	34.895	37.105	39.799	36.779	28.724	29.227
566	58.191	53.532	46.852	48.763	43.484	43.82	40.58	34.871	36.947	39.768	36.679	28.653	29.188
566.5	58.203	53.553	46.904	48.702	43.572	43.917	40.598	34.789	36.719	39.684	36.637	28.648	29.205
567	58.213	53.652	46.918	48.714	43.566	43.908	40.582	34.738	36.548	39.552	36.598	28.664	29.242
567.5	58.175	53.72	46.858	48.638	43.566	43.879	40.5	34.744	36.517	39.462	36.554	28.697	29.174
568	58.11	53.603	46.759	48.616	43.571	43.965	40.441	34.674	36.536	39.384	36.434	28.681	29.063
568.5	58.018	53.657	46.705	48.576	43.556	44.09	40.412	34.623	36.502	39.28	36.355	28.666	28.965
569	58.01	53.794	46.673	48.4	43.441	44.101	40.451	34.557	36.331	39.14	36.308	28.692	28.954
569.5	57.954	53.987	46.699	48.404	43.285	44.026	40.578	34.514	36.086	38.919	36.202	28.683	29.006
570	58.101	54.044	46.743	48.371	43.098	43.895	40.686	34.395	35.789	38.729	36.055	28.617	29.032
570.5	58.362	54.004	46.81	48.435	43.048	43.888	40.773	34.27	35.597	38.635	35.884	28.516	28.98
571	58.555	54.017	46.887	48.53	43.056	44.057	40.781	34.187	35.401	38.57	35.743	28.394	28.894
571.5	58.655	54.016	46.979	48.522	43.17	44.274	40.737	34.135	35.27	38.51	35.69	28.385	28.842
572	58.587	53.967	46.973	48.45	43.147	44.363	40.688	34.123	35.192	38.487	35.629	28.397	28.831
572.5	58.499	53.95	46.994	48.265	43.019	44.281	40.609	34.083	35.177	38.456	35.636	28.404	28.857
573	58.32	54.079	46.864	48.116	42.865	44.234	40.625	34.075	35.192	38.419	35.636	28.343	28.827
573.5	58.11	54.225	46.76	48.079	42.743	44.254	40.704	34.066	35.064	38.29	35.627	28.222	28.761
574	58.022	54.225	46.599	48.236	42.794	44.406	40.831	33.983	34.865	38.156	35.576	28.103	28.684
574.5	58.009	54.162	46.515	48.317	42.895	44.483	40.814	33.898	34.615	38.011	35.496	27.987	28.653
575	58.089	54.082	46.436	48.366	42.971	44.589	40.752	33.801	34.48	37.974	35.456	27.954	28.685
575.5	58.117	54.102	46.431	48.273	42.929	44.598	40.664	33.722	34.397	37.873	35.394	28.002	28.732
576	58.231	54.211	46.566	48.201	42.831	44.542	40.701	33.648	34.296	37.748	35.31	28.044	28.699
576.5	58.261	54.305	46.641	48.188	42.77	44.528	40.681	33.605	34.128	37.581	35.165	28.055	28.653
577	58.274	54.352	46.657	48.245	42.808	44.57	40.621	33.643	33.96	37.529	35.059	28.02	28.565
577.5	58.176	54.338	46.504	48.411	42.867	44.7	40.495	33.735	33.81	37.549	35.022	27.96	28.482
578	58.147	54.342	46.359	48.402	42.854	44.831	40.505	33.72	33.724	37.566	35.002	27.918	28.467
578.5	58.198	54.467	46.361	48.337	42.836	44.89	40.593	33.635	33.67	37.478	34.958	27.862	28.454
579	58.261	54.548	46.398	48.203	42.852	44.984	40.632	33.543	33.519	37.391	34.902	27.806	28.416
579.5	58.221	54.61	46.357	48.12	42.85	45.02	40.679	33.492	33.398	37.243	34.763	27.783	28.342
580	58.147	54.508	46.232	48.137	42.759	44.996	40.741	33.413	33.356	37.164	34.63	27.757	28.27
580.5	58.039	54.472	46.106	48.117	42.655	45.026	40.913	33.211	33.335	36.999	34.492	27.782	28.262
581	58.033	54.403	46.102	48.171	42.6	45.001	40.953	33.08	33.278	36.911	34.449	27.744	28.299
581.5	58.011	54.317	46.152	48.195	42.626	45.024	40.849	33.084	33.072	36.862	34.435	27.667	28.333
582	58.013	54.316	46.21	48.13	42.63	45.009	40.724	33.176	32.861	36.822	34.378	27.632	28.398
582.5	58.1	54.326	46.297	47.999	42.534	44.989	40.684	33.184	32.745	36.731	34.293	27.646	28.417
583	58.105	54.383	46.392	47.936	42.511	45.075	40.776	33.113	32.555	36.632	34.261	27.727	28.36
583.5	58.058	54.345	46.439	47.998	42.461	45.144	40.816	33.036	32.413	36.614	34.371	27.743	28.259
584	57.95	54.374	46.4	48.096	42.471	45.212	40.729	33.062	32.292	36.622	34.533	27.734	28.211
584.5	57.944	54.496	46.311	48.164	42.42	45.204	40.631	33.093	32.261	36.571	34.619	27.686	28.208
585	58.033	54.653	46.149	48.175	42.411	45.247	40.605	33.078	32.154	36.457	34.483	27.605	28.188
585.5	58.107	54.701	46.024	48.22	42.443	45.28	40.713	33.025	32.026	36.365	34.297	27.462	28.045
586	58.115	54.638	45.94	48.244	42.484	45.436	40.808	33.005	31.92	36.397	34.158	27.344	27.933
586.5	58.119	54.586	45.953	48.219	42.465	45.527	40.843	32.927	32.008	36.348	34.182	27.306	27.912
587	58.142	54.486	45.906	48.144	42.329	45.639	40.866	32.86	32.094	36.31	34.231	27.374	28.037
587.5	58.118	54.508	45.74	48.105	42.245	45.641	40.856	32.768	32.157	36.203	34.247	27.427	28.04
588	58.015	54.616	45.747	48.125	42.221	45.568	40.876	32.746	32.061	36.149	34.239	27.422	27.963
588.5	57.94	54.701	45.856	48.151	42.248	45.574	40.927	32.791	31.961	36.137	34.194	27.436	27.855
589	57.9	54.698	45.986	48.15	42.28	45.659	40.912	32.797	31.794	36.098	34.179	27.425	27.846
589.5	57.859	54.641	45.916	47.969	42.238	45.754	40.846	32.73	31.646	35.981	34.165	27.4	27.884
590	57.754	54.681	45.728	47.772	42.255	45.746	40.826	32.681	31.567	35.878	34.208	27.302	27.914
590.5	57.579	54.752	45.554	47.636	42.246	45.6	40.878	32.637	31.539	35.807	34.159	27.229	27.91
591	57.534	54.849	45.529	47.668	42.227	45.538	41.021	32.68	31.568	35.845	34.091	27.228	27.873
591.5	57.66	54.931	45.63	47.754	42.176	45.551	41.122	32.76	31.546	35.927	34.083	27.261	27.816
592	57.926	55.01	45.767	47.867	42.183	45.765	41.17	32.853	31.562	35.979	34.128	27.317	27.775
592.5	58.113	55.057	45.872	47.921	42.193	45.935	41.229	32.883	31.598	35.969	34.183	27.329	27.802
593	58.06	54.993	45.797	47.883	42.257	46.019	41.166	32.824	31.636	35.921	34.145	27.279	27.823
593.5	57.949	55.024	45.78	47.758	42.283	46.057	41.092	32.717	31.601	35.932	34.099	27.168	27.787
594	57.776	55.088	45.74	47.611	42.318	46.07	41.049	32.609	31.466	35.893	34.067	27.092	27.7
594.5	57.814	55.206	45.823	47.676	42.282	46.137	41.095	32.596	31.333	35.853	34.029	27.052	27.64
595	57.896	55.233	45.891	47.746	42.205	46.079	41.213	32.616	31.256	35.758	34.032	27.032	27.611
595.5	58.05	55.233	46.017	47.912	42.083	45.948	41.335	32.651	31.197	35.678	34.013	27.019	27.684
596	58.173	55.28	46.155	47.992	42.017	45.933	41.42	32.626	31.154	35.612	33.967	27.018	27.727
596.5	58.176	55.306	46.22	48.002	42.009	45.945	41.487	32.583	31.086	35.615	33.906	27.05	27.779
597	58.186	55.402	46.172	47.924	42.021	46.054	41.337	32.576	31.06	35.682	33.883	27.092	27.77
597.5	58.174	55.491	46.156	47.86	42.154	46.18	41.252	32.549	31.029	35.704	33.894	27.096	27.801
598	58.127	55.571	46.121	47.91	42.3	46.247	41.156	32.565	30.993	35.584	33.893	27.109	27.811
598.5	58.091	55.55	46.117	47.979	42.381	46.361	41.156	32.494	30.894	35.417	33.903	27.162	27.821
599	58.107	55.453	46.013	47.991	42.352	46.421	41.189	32.417	30.833	35.318	33.928	27.189	27.759
599.5	58.192	55.447	45.962	48.033	42.288	46.45	41.198	32.388	30.807	35.389	33.971	27.182	27.695
600	58.267	55.514	45.98	48.083	42.285	46.448	41.154	32.428	30.807	35.428	33.957	27.105	27.646
600.5	58.214	55.445	45.948	48.069	42.397	46.48	41.04	32.489	30.818	35.398	33.952	27.122	27.641
601	58.079	55.313	45.83	47.962	42.407	46.546	40.967	32.489	30.813	35.28	33.92	27.142	27.673
601.5	58.008	55.212	45.707	47.912	42.424	46.632	41.014	32.475	30.839	35.265	33.921	27.114	27.68
602	57.987	55.144	45.586	47.927	42.303	46.627	41.158	32.47	30.8	35.303	33.884	27.028	27.605
602.5	58.029	55.278	45.66	48.005	42.177	46.542	41.322	32.485	30.687	35.341	33.828	26.972	27.594
603	57.956	55.301	45.635	47.95	42.04	46.5	41.517	32.43	30.582	35.325	33.76	26.919	27.555
603.5	57.813	55.48	45.617	47.918	41.976	46.452	41.657	32.417	30.507	35.317	33.739	26.903	27.56
604	57.715	55.553	45.556	47.847	42.002	46.503	41.499	32.395	30.47	35.254	33.789	26.907	27.493
604.5	57.779	55.52	45.602	47.786	42.066	46.583	41.255	32.417	30.4	35.142	33.8	26.9	27.401
605	57.864	55.468	45.659	47.755	42.128	46.716	41.097	32.437	30.238	35.002	33.702	26.845	27.4
605.5	57.946	55.421	45.675	47.739	42.083	46.762	41.16	32.341	30.04	34.896	33.612	26.797	27.461
606	57.881	55.497	45.576	47.765	41.946	46.836	41.221	32.247	29.915	34.837	33.628	26.776	27.529
606.5	57.808	55.459	45.513	47.702	41.791	46.827	41.217	32.175	29.915	34.799	33.684	26.806	27.585
607	57.701	55.367	45.407	47.729	41.82	46.898	41.256	32.224	29.959	34.731	33.685	26.786	27.585
607.5	57.659	55.311	45.366	47.714	41.957	46.808	41.383	32.262	29.957	34.725	33.508	26.707	27.581
608	57.576	55.311	45.359	47.781	42.126	46.761	41.413	32.246	29.926	34.698	33.331	26.639	27.523
608.5	57.595	55.317	45.344	47.849	42.157	46.758	41.343	32.147	29.871	34.665	33.241	26.619	27.402
609	57.522	55.263	45.295	47.764	42.035	46.804	41.277	32.049	29.756	34.547	33.238	26.658	27.359
609.5	57.489	55.299	45.185	47.615	41.898	46.779	41.301	31.886	29.608	34.402	33.285	26.711	27.321
610	57.425	55.369	45.157	47.484	41.867	46.754	41.352	31.798	29.477	34.341	33.241	26.704	27.253
610.5	57.378	55.376	45.092	47.422	41.88	46.67	41.421	31.721	29.344	34.255	33.099	26.638	27.129
611	57.357	55.359	45.175	47.361	41.833	46.553	41.465	31.641	29.221	34.153	32.879	26.544	27.018
611.5	57.296	55.329	45.158	47.165	41.67	46.442	41.441	31.636	29.107	34.002	32.738	26.469	26.948
612	57.201	55.316	45.119	47.038	41.461	46.382	41.351	31.545	28.993	33.952	32.747	26.404	26.941
612.5	57.033	55.179	45.002	47.051	41.384	46.508	41.212	31.493	28.895	33.977	32.81	26.385	26.936
613	56.845	55.132	44.866	47.133	41.382	46.617	41.121	31.467	28.813	33.996	32.806	26.372	26.954
613.5	56.626	55.204	44.758	47.136	41.427	46.711	41.066	31.458	28.733	33.935	32.726	26.326	26.922
614	56.549	55.391	44.707	47.073	41.428	46.712	41.023	31.389	28.643	33.847	32.613	26.284	26.893
614.5	56.622	55.418	44.6	46.984	41.412	46.715	41.089	31.297	28.547	33.777	32.54	26.206	26.914
615	56.756	55.335	44.498	46.887	41.377	46.626	41.171	31.262	28.501	33.788	32.487	26.134	26.954
615.5	56.717	55.173	44.378	46.905	41.421	46.66	41.166	31.272	28.39	33.743	32.493	26.024	26.95
616	56.597	55.16	44.308	46.793	41.343	46.552	41.104	31.296	28.311	33.718	32.515	25.948	26.899
616.5	56.495	55.134	44.283	46.718	41.181	46.521	40.994	31.191	28.265	33.601	32.473	25.906	26.778
617	56.474	55.228	44.27	46.624	41.01	46.565	40.887	31.118	28.238	33.483	32.386	25.955	26.742
617.5	56.414	55.226	44.252	46.557	40.898	46.642	40.791	31.027	28.16	33.368	32.282	25.967	26.688
618	56.262	55.14	44.172	46.619	40.977	46.775	40.723	30.957	28.002	33.257	32.19	26.047	26.731
618.5	56.157	54.954	44.002	46.639	41.05	46.791	40.694	30.889	27.847	33.138	32.11	26.068	26.69
619	56.067	54.832	43.885	46.584	41.033	46.745	40.747	30.852	27.655	33.072	32.029	26.052	26.688
619.5	55.97	54.848	43.823	46.444	40.87	46.613	40.739	30.857	27.523	33.057	32.022	25.967	26.691
620	55.852	54.926	43.843	46.244	40.682	46.416	40.753	30.902	27.553	33.09	32.01	25.843	26.719
620.5	55.738	54.988	43.865	46.173	40.532	46.281	40.656	30.863	27.668	33.139	31.934	25.772	26.713
621	55.714	54.977	43.92	46.153	40.556	46.272	40.653	30.823	27.72	33.135	31.798	25.723	26.668
621.5	55.74	54.979	43.981	46.149	40.481	46.297	40.659	30.784	27.605	33.098	31.763	25.756	26.603
622	55.727	54.977	43.902	46.075	40.434	46.342	40.673	30.739	27.535	32.994	31.818	25.801	26.535
622.5	55.738	55.012	43.83	46.01	40.383	46.411	40.629	30.645	27.473	32.773	31.856	25.868	26.465
623	55.884	55.02	43.852	45.967	40.422	46.532	40.567	30.472	27.41	32.713	31.801	25.894	26.417
623.5	56.029	54.994	43.905	45.974	40.489	46.699	40.555	30.421	27.398	32.689	31.772	25.906	26.425
624	56.127	55.004	43.913	46.016	40.566	46.657	40.644	30.487	27.373	32.668	31.808	25.866	26.444
624.5	56.054	55.01	43.771	46.095	40.685	46.582	40.692	30.601	27.374	32.565	31.843	25.797	26.41
625	56.001	55.082	43.656	46.209	40.745	46.511	40.764	30.687	27.296	32.451	31.832	25.742	26.3
625.5	55.986	55.155	43.528	46.162	40.736	46.537	40.665	30.565	27.23	32.47	31.802	25.795	26.21
626	56.053	55.227	43.473	46.05	40.67	46.627	40.598	30.43	27.167	32.562	31.759	25.822	26.186
626.5	56.148	55.212	43.397	46.011	40.642	46.689	40.417	30.338	27.098	32.628	31.704	25.836	26.259
627	56.221	55.178	43.454	46.046	40.574	46.754	40.31	30.395	27.086	32.68	31.653	25.735	26.349
627.5	56.258	55.28	43.603	46.06	40.537	46.752	40.298	30.457	27.05	32.65	31.674	25.719	26.415
628	56.303	55.39	43.788	45.957	40.545	46.737	40.446	30.453	27.013	32.565	31.75	25.659	26.418
628.5	56.198	55.461	43.898	45.924	40.496	46.731	40.622	30.43	26.969	32.476	31.757	25.63	26.412
629	56.065	55.369	43.854	45.929	40.346	46.732	40.676	30.463	26.972	32.356	31.693	25.606	26.413
629.5	55.935	55.29	43.767	45.906	40.202	46.722	40.71	30.581	26.975	32.361	31.662	25.607	26.423
630	55.901	55.271	43.692	45.953	40.225	46.722	40.681	30.653	26.964	32.422	31.714	25.624	26.347
630.5	55.97	55.271	43.671	46.005	40.423	46.814	40.589	30.661	26.947	32.543	31.811	25.593	26.304
631	56.114	55.338	43.686	46.189	40.583	46.916	40.515	30.542	26.931	32.553	31.867	25.613	26.29
631.5	56.246	55.382	43.714	46.316	40.693	46.971	40.473	30.394	26.874	32.49	31.829	25.671	26.374
632	56.32	55.561	43.762	46.352	40.528	46.857	40.425	30.286	26.829	32.462	31.752	25.682	26.34
632.5	56.265	55.65	43.774	46.27	40.398	46.73	40.381	30.249	26.847	32.472	31.69	25.607	26.332
633	56.296	55.623	43.666	46.077	40.305	46.696	40.384	30.356	26.885	32.48	31.662	25.516	26.263
633.5	56.327	55.508	43.58	45.958	40.324	46.768	40.52	30.468	26.846	32.469	31.619	25.499	26.253
634	56.287	55.424	43.508	45.865	40.333	46.903	40.614	30.482	26.722	32.44	31.501	25.511	26.2
634.5	56.123	55.468	43.482	45.803	40.225	46.884	40.617	30.35	26.642	32.433	31.425	25.443	26.105
635	56.039	55.45	43.401	45.719	40.161	46.813	40.572	30.265	26.637	32.354	31.394	25.33	26.02
635.5	56.11	55.502	43.304	45.661	40.103	46.681	40.563	30.232	26.638	32.171	31.372	25.243	25.933
636	56.245	55.564	43.288	45.573	40.09	46.626	40.502	30.209	26.65	31.973	31.349	25.265	25.916
636.5	56.254	55.584	43.206	45.538	40.117	46.686	40.411	30.088	26.589	31.74	31.292	25.299	25.922
637	56.099	55.44	43.047	45.412	40.14	46.743	40.406	29.886	26.502	31.655	31.279	25.366	25.886
637.5	55.921	55.207	42.887	45.316	40.172	46.754	40.497	29.739	26.295	31.573	31.2	25.319	25.828
638	55.864	55.14	42.853	45.138	40.098	46.813	40.631	29.671	26.114	31.567	31.083	25.26	25.768
638.5	55.843	55.184	42.87	44.937	39.927	46.818	40.591	29.669	25.957	31.5	30.93	25.148	25.742
639	55.859	55.219	42.741	44.759	39.821	46.808	40.494	29.592	25.846	31.441	30.759	25.063	25.696
639.5	55.762	55.151	42.582	44.615	39.794	46.652	40.378	29.503	25.742	31.33	30.612	24.943	25.633
640	55.747	55.049	42.424	44.596	39.836	46.602	40.374	29.39	25.649	31.169	30.429	24.863	25.572
640.5	55.677	55.002	42.417	44.646	39.865	46.615	40.26	29.29	25.499	30.972	30.251	24.83	25.513
641	55.708	54.984	42.386	44.71	39.879	46.546	40.014	29.135	25.347	30.81	30.138	24.8	25.417
641.5	55.648	55.035	42.44	44.605	39.9	46.402	39.811	29.004	25.221	30.686	30.109	24.745	25.296
642	55.619	55.122	42.401	44.438	39.81	46.22	39.679	28.883	25.142	30.569	30.101	24.635	25.178
642.5	55.606	55.119	42.251	44.209	39.648	46.147	39.714	28.72	25.056	30.433	30.086	24.573	25.139
643	55.515	54.989	41.943	44.062	39.536	46.061	39.702	28.56	24.934	30.241	30.025	24.551	25.161
643.5	55.36	54.823	41.78	43.812	39.47	46.034	39.726	28.458	24.844	30.055	29.939	24.581	25.138
644	55.147	54.728	41.707	43.639	39.496	46.047	39.732	28.408	24.729	29.893	29.79	24.513	25
644.5	55.016	54.685	41.633	43.496	39.476	46.077	39.709	28.367	24.624	29.813	29.604	24.409	24.831
645	54.932	54.568	41.397	43.32	39.424	46.025	39.705	28.304	24.455	29.703	29.404	24.256	24.678
645.5	54.732	54.372	41.149	43.068	39.277	45.982	39.648	28.161	24.341	29.615	29.232	24.203	24.549
646	54.587	54.27	41.002	42.902	39.142	46.022	39.524	28.048	24.22	29.526	29.093	24.171	24.498
646.5	54.452	54.233	40.875	42.807	39.012	46.149	39.446	27.944	24.153	29.488	28.998	24.121	24.49
647	54.468	54.264	40.755	42.82	38.98	46.136	39.367	27.808	24.004	29.344	28.795	24.019	24.54
647.5	54.479	54.188	40.542	42.586	38.883	45.883	39.281	27.713	23.851	29.15	28.531	23.894	24.468
648	54.374	53.934	40.389	42.391	38.833	45.574	39.124	27.665	23.738	29.005	28.266	23.805	24.39
648.5	54.218	53.774	40.204	42.22	38.791	45.403	38.989	27.698	23.686	28.901	28.088	23.779	24.328
649	54.008	53.814	40.094	42.127	38.783	45.366	38.863	27.655	23.627	28.83	28.024	23.731	24.232
649.5	53.957	54.057	40.07	42.027	38.718	45.379	38.782	27.427	23.505	28.717	27.985	23.626	24.109
650	53.92	53.994	39.981	41.705	38.623	45.396	38.715	27.216	23.418	28.702	28.02	23.577	24.019
650.5	53.816	53.66	39.772	41.412	38.49	45.41	38.767	27.072	23.329	28.675	27.983	23.573	23.981
651	53.671	53.362	39.493	41.105	38.371	45.375	38.785	26.983	23.223	28.66	27.938	23.587	23.952
651.5	53.531	53.365	39.423	41.06	38.298	45.338	38.765	26.977	23.12	28.529	27.914	23.526	23.873
652	53.461	53.491	39.494	41.089	38.291	45.322	38.698	26.967	23.133	28.494	27.919	23.454	23.821
652.5	53.369	53.517	39.6	41.252	38.343	45.33	38.632	26.972	23.201	28.464	27.908	23.457	23.816
653	53.139	53.396	39.552	41.318	38.443	45.32	38.594	26.884	23.141	28.4	27.739	23.442	23.777
653.5	52.928	53.258	39.502	41.214	38.518	45.314	38.506	26.762	23.026	28.259	27.522	23.361	23.721
654	52.763	53.19	39.398	41.078	38.558	45.34	38.439	26.747	22.929	28.126	27.396	23.191	23.672
654.5	52.665	53.151	39.324	40.945	38.494	45.333	38.457	26.801	22.931	28.063	27.42	23.115	23.682
655	52.462	53.087	39.141	40.936	38.35	45.347	38.48	26.822	22.926	28.079	27.524	23.072	23.665
655.5	52.24	52.918	38.896	40.844	38.304	45.274	38.538	26.752	22.836	28.032	27.466	23.07	23.604
656	51.967	52.77	38.683	40.763	38.225	45.208	38.446	26.595	22.696	27.882	27.213	23.071	23.551
656.5	51.792	52.666	38.631	40.645	38.169	45.044	38.349	26.492	22.532	27.665	26.929	23.067	23.535
657	51.544	52.594	38.609	40.488	37.972	44.952	38.204	26.475	22.396	27.49	26.822	23.056	23.473
657.5	51.395	52.528	38.481	40.256	37.768	44.807	38.06	26.468	22.276	27.425	26.869	23.021	23.379
658	51.111	52.413	38.229	40.088	37.598	44.691	37.929	26.404	22.174	27.298	26.88	22.978	23.324
658.5	50.728	52.28	37.922	39.969	37.49	44.574	37.747	26.28	22.084	27.187	26.819	22.901	23.324
659	50.365	52.151	37.633	39.738	37.381	44.475	37.64	26.145	22.004	27.11	26.67	22.696	23.264
659.5	50.117	52.098	37.318	39.481	37.342	44.421	37.557	26.026	21.919	27.119	26.551	22.572	23.133
660	50.034	51.987	37.046	39.306	37.353	44.37	37.396	25.92	21.829	27.054	26.323	22.516	22.996
660.5	49.853	51.716	36.872	39.14	37.255	44.319	37.141	25.732	21.708	26.912	26.117	22.468	22.902
661	49.658	51.392	36.725	38.913	37.077	44.18	36.891	25.639	21.575	26.763	25.988	22.32	22.796
661.5	49.411	51.192	36.575	38.675	36.89	44.03	36.793	25.522	21.486	26.668	25.93	22.132	22.678
662	49.111	51.101	36.462	38.409	36.785	43.883	36.796	25.494	21.419	26.545	25.882	22.07	22.532
662.5	48.642	50.941	36.251	38.133	36.652	43.794	36.779	25.365	21.298	26.351	25.752	22.096	22.469
663	48.218	50.762	36.003	37.708	36.42	43.606	36.688	25.239	21.151	26.173	25.567	22.116	22.414
663.5	47.805	50.448	35.597	37.352	36.085	43.367	36.524	25.145	20.988	26	25.346	22.015	22.349
664	47.515	50.32	35.338	37.079	35.862	43.128	36.281	25.101	20.957	25.946	25.162	21.879	22.275
664.5	47.168	50.022	35.064	36.967	35.652	43.029	36.05	25.04	20.938	25.903	24.996	21.701	22.231
665	46.905	49.889	34.83	36.907	35.624	42.942	35.86	24.956	20.951	25.869	24.872	21.59	22.221
665.5	46.618	49.503	34.549	36.826	35.589	42.896	35.685	24.835	20.891	25.742	24.784	21.49	22.144
666	46.345	49.198	34.362	36.658	35.51	42.773	35.498	24.731	20.765	25.57	24.722	21.473	22.045
666.5	45.995	48.844	34.156	36.408	35.366	42.662	35.271	24.644	20.603	25.42	24.59	21.446	21.944
667	45.655	48.634	33.968	36.12	35.169	42.465	35.083	24.583	20.503	25.307	24.434	21.352	21.851
667.5	45.259	48.386	33.702	35.814	35.037	42.315	34.931	24.518	20.498	25.208	24.372	21.237	21.736
668	44.994	48.17	33.434	35.497	34.893	42.155	34.772	24.399	20.479	25.141	24.322	21.109	21.656
668.5	44.724	47.893	33.137	35.257	34.812	42.083	34.658	24.244	20.433	25.1	24.249	21.099	21.566
669	44.603	47.772	32.953	35.121	34.727	41.935	34.564	24.168	20.362	25.093	24.152	21.07	21.5
669.5	44.441	47.696	32.919	35.027	34.591	41.794	34.506	24.187	20.399	25.162	24.105	21.034	21.414
670	44.283	47.636	32.909	34.912	34.293	41.612	34.329	24.235	20.424	25.106	23.995	20.984	21.378
670.5	43.974	47.483	32.708	34.792	34.126	41.583	34.11	24.228	20.376	24.95	23.851	20.931	21.334
671	43.71	47.345	32.418	34.723	34.049	41.537	33.958	24.287	20.266	24.801	23.786	20.864	21.302
671.5	43.482	47.216	32.296	34.645	34.031	41.445	33.892	24.339	20.247	24.786	23.762	20.772	21.245
672	43.406	47.132	32.368	34.453	33.868	41.292	33.804	24.422	20.326	24.872	23.789	20.728	21.18
672.5	43.341	46.974	32.444	34.315	33.731	41.222	33.756	24.393	20.437	24.89	23.78	20.765	21.158
673	43.313	46.9	32.402	34.221	33.731	41.181	33.692	24.285	20.407	24.861	23.75	20.831	21.129
673.5	43.291	46.887	32.302	34.211	33.791	41.156	33.687	24.131	20.385	24.825	23.697	20.866	21.081
674	43.181	46.852	32.23	34.193	33.878	41.098	33.647	24.03	20.367	24.892	23.66	20.865	21.052
674.5	43.003	46.668	32.167	34.058	33.816	40.997	33.576	24.081	20.435	24.977	23.675	20.807	21.092
675	42.836	46.569	32.213	33.937	33.704	40.878	33.573	24.098	20.492	25	23.734	20.775	21.14
675.5	42.829	46.583	32.256	33.897	33.61	40.886	33.525	24.103	20.52	24.887	23.796	20.786	21.166
676	42.923	46.617	32.197	33.956	33.58	40.943	33.562	24.064	20.555	24.833	23.842	20.85	21.122
676.5	42.939	46.464	32.074	33.957	33.592	40.944	33.564	24.109	20.574	24.886	23.883	20.896	21.106
677	42.865	46.36	32.077	33.874	33.512	40.854	33.577	24.119	20.642	25.014	23.925	20.877	21.057
677.5	42.765	46.361	32.161	33.877	33.484	40.883	33.579	24.151	20.601	25.101	23.922	20.855	21.099
678	42.727	46.457	32.25	34.064	33.557	40.997	33.557	24.14	20.581	25.162	23.896	20.874	21.131
678.5	42.71	46.457	32.296	34.31	33.711	41.151	33.544	24.156	20.655	25.173	23.86	20.903	21.172
679	42.857	46.557	32.476	34.376	33.763	41.103	33.531	24.141	20.835	25.195	23.888	20.869	21.166
679.5	43.048	46.648	32.679	34.346	33.675	41.031	33.458	24.21	20.983	25.158	23.942	20.854	21.194
680	43.257	46.813	32.772	34.413	33.629	40.99	33.479	24.24	21.035	25.139	24.069	20.861	21.23
680.5	43.463	47.059	32.795	34.659	33.769	41.089	33.637	24.353	21.082	25.19	24.248	20.868	21.332
681	43.616	47.22	32.887	34.953	33.978	41.221	33.844	24.432	21.115	25.345	24.395	20.882	21.437
681.5	43.874	47.356	33.107	35.172	34.177	41.457	34.035	24.563	21.188	25.604	24.54	20.926	21.55
682	44.077	47.391	33.313	35.419	34.406	41.831	34.25	24.685	21.288	25.831	24.731	21.051	21.609
682.5	44.423	47.747	33.604	35.698	34.649	42.156	34.545	24.8	21.453	26.053	24.983	21.212	21.666
683	44.824	48.192	33.983	36.028	34.926	42.43	34.852	24.934	21.617	26.194	25.244	21.387	21.724
683.5	45.228	48.744	34.458	36.411	35.196	42.606	35.176	25.057	21.761	26.341	25.466	21.531	21.834
684	45.629	49.21	34.95	36.776	35.535	42.843	35.537	25.288	21.869	26.456	25.729	21.639	22.057
684.5	46.105	49.758	35.44	37.172	35.875	43.091	35.907	25.555	21.994	26.58	26.042	21.744	22.289
685	46.707	50.311	35.869	37.583	36.185	43.332	36.189	25.883	22.06	26.757	26.335	21.894	22.502
685.5	47.342	50.835	36.254	38.146	36.588	43.643	36.427	26.194	22.135	27.051	26.653	22.12	22.716
686	47.861	51.175	36.73	38.848	37.085	44.001	36.765	26.423	22.284	27.342	26.987	22.367	22.988
686.5	48.438	51.597	37.304	39.538	37.56	44.37	37.161	26.615	22.593	27.571	27.312	22.625	23.278
687	49.039	52.081	37.819	40.196	37.942	44.839	37.621	26.848	22.978	27.862	27.722	22.858	23.506
687.5	49.735	52.811	38.442	40.812	38.338	45.202	38.093	27.302	23.322	28.317	28.21	23.05	23.728
688	50.502	53.455	39.17	41.518	38.846	45.636	38.568	27.773	23.67	28.846	28.848	23.236	23.936
688.5	51.351	54.109	40.06	42.203	39.375	45.981	39.011	28.126	24.047	29.327	29.452	23.429	24.18
689	52.17	54.68	40.881	42.792	39.783	46.335	39.328	28.495	24.393	29.832	30.046	23.73	24.541
689.5	52.846	55.261	41.624	43.416	40.129	46.662	39.638	28.941	24.73	30.314	30.65	24.004	24.986
690	53.475	55.741	42.269	44.095	40.444	47.001	40	29.461	25.117	30.812	31.368	24.293	25.374
690.5	54.058	56.127	42.838	44.701	40.739	47.387	40.338	29.979	25.612	31.315	32.125	24.629	25.642
691	54.523	56.354	43.323	45.333	41.118	47.692	40.712	30.539	26.154	31.942	32.792	24.985	25.848
691.5	54.885	56.595	43.86	45.965	41.654	47.937	41.08	31.191	26.691	32.602	33.358	25.313	26.12
692	55.323	56.926	44.387	46.683	42.174	48.239	41.57	31.783	27.199	33.208	33.93	25.626	26.455
692.5	55.851	57.351	45.058	47.228	42.598	48.714	42.041	32.438	27.731	33.789	34.63	25.931	26.777
693	56.508	57.767	45.503	47.852	42.885	49.16	42.428	32.989	28.366	34.401	35.317	26.215	27.044
693.5	57.094	58.204	45.984	48.459	43.227	49.577	42.819	33.525	29.028	35.082	36.002	26.494	27.333
694	57.675	58.688	46.46	49.081	43.544	49.861	43.239	34.047	29.661	35.783	36.685	26.866	27.668
694.5	58.176	59.092	47.115	49.676	43.954	50.186	43.645	34.7	30.174	36.549	37.385	27.33	28.041
695	58.741	59.54	47.751	50.213	44.419	50.397	43.875	35.321	30.713	37.293	38.007	27.704	28.329
695.5	59.256	60.036	48.353	50.652	44.833	50.537	43.951	35.883	31.319	37.992	38.573	27.994	28.58
696	59.497	60.461	48.811	51.042	45.004	50.569	44.131	36.407	32.092	38.601	39.216	28.214	28.764
696.5	59.775	60.769	49.202	51.478	45.108	50.697	44.448	36.934	32.869	39.137	39.952	28.461	28.998
697	60.127	60.936	49.591	51.952	45.206	50.915	44.841	37.402	33.52	39.639	40.603	28.738	29.293
697.5	60.637	61.099	49.996	52.377	45.375	51.172	45.197	37.85	34.048	40.256	41.175	29.092	29.663
698	60.894	61.153	50.257	52.75	45.556	51.311	45.506	38.301	34.621	40.899	41.713	29.377	29.978
698.5	61.164	61.313	50.586	53.065	45.865	51.486	45.778	38.879	35.232	41.592	42.334	29.615	30.236
699	61.541	61.495	50.943	53.42	46.245	51.791	45.942	39.626	35.877	42.203	43.009	29.814	30.463
699.5	61.918	61.697	51.304	53.938	46.596	52.203	45.966	40.343	36.472	42.806	43.61	30.03	30.658
700	62.11	61.828	51.628	54.401	46.798	52.437	46.032	40.993	37.139	43.296	44.16	30.205	30.833
700.5	62.185	61.954	51.966	54.713	47.014	52.603	46.069	41.4	37.662	43.691	44.646	30.419	31.04
701	62.328	62.034	52.245	54.87	47.161	52.749	46.186	41.704	38.149	44.117	45.072	30.719	31.277
701.5	62.662	62.278	52.353	55.178	47.205	52.93	46.35	42.091	38.669	44.696	45.482	31.008	31.505
702	63.102	62.616	52.544	55.532	47.224	53.002	46.651	42.574	39.205	45.326	45.876	31.214	31.71
702.5	63.444	62.892	52.795	55.814	47.299	53.019	46.887	43.117	39.792	45.958	46.423	31.339	31.872
703	63.692	63.015	53.079	55.926	47.466	53.088	46.924	43.473	40.232	46.424	46.921	31.509	32
703.5	63.829	63.081	53.31	56.047	47.592	53.154	46.923	43.971	40.811	46.838	47.427	31.719	32.108
704	64.026	63.222	53.535	56.233	47.743	53.232	47.064	44.433	41.346	47.226	47.732	31.922	32.272
704.5	64.052	63.258	53.693	56.454	47.898	53.419	47.261	44.818	41.927	47.671	48.071	32.078	32.449
705	63.91	63.143	53.729	56.746	48.057	53.735	47.414	44.982	42.379	48.046	48.451	32.165	32.602
705.5	63.693	63.111	53.814	57.003	48.171	53.952	47.439	45.242	42.731	48.346	48.902	32.262	32.703
706	63.644	63.223	54.066	57.185	48.243	54.055	47.577	45.59	43.059	48.566	49.284	32.454	32.799
706.5	63.81	63.529	54.413	57.266	48.256	53.972	47.785	45.858	43.449	48.802	49.59	32.706	32.952
707	64.175	63.736	54.656	57.35	48.313	54.074	47.878	46.059	43.951	49.121	49.939	32.884	33.079
707.5	64.522	63.958	54.767	57.442	48.325	54.108	47.836	46.365	44.379	49.529	50.22	33.003	33.189
708	64.81	64.012	54.886	57.596	48.362	54.264	47.781	46.83	44.778	49.992	50.46	33.204	33.249
708.5	64.99	64.141	55.074	57.825	48.442	54.355	47.964	47.161	45.103	50.403	50.628	33.39	33.354
709	65.162	64.196	55.244	58.157	48.732	54.518	48.215	47.415	45.483	50.763	50.915	33.47	33.488
709.5	65.289	64.346	55.354	58.329	49.026	54.521	48.331	47.752	45.964	51.119	51.229	33.538	33.595
710	65.3	64.349	55.419	58.536	49.178	54.552	48.391	48.135	46.411	51.392	51.593	33.646	33.706
710.5	65.302	64.404	55.48	58.732	49.164	54.538	48.456	48.443	46.704	51.628	51.93	33.829	33.857
711	65.293	64.318	55.495	58.772	49.078	54.44	48.503	48.614	46.85	51.841	52.279	34.01	34.03
711.5	65.27	64.29	55.573	58.618	49.028	54.35	48.462	48.717	47.124	52.093	52.551	34.122	34.161
712	65.337	64.342	55.799	58.488	49	54.407	48.415	48.824	47.494	52.314	52.761	34.169	34.268
712.5	65.406	64.438	55.993	58.64	49.122	54.654	48.507	49.125	47.953	52.645	53.004	34.156	34.329
713	65.593	64.655	56.093	58.833	49.346	54.761	48.713	49.538	48.354	53.032	53.236	34.306	34.405
713.5	65.606	64.864	56.074	58.955	49.538	54.84	48.801	49.969	48.801	53.415	53.5	34.448	34.404
714	65.629	64.95	56.17	59.096	49.625	54.953	48.837	50.276	49.064	53.657	53.875	34.645	34.45
714.5	65.66	64.841	56.333	59.442	49.65	55.073	48.79	50.453	49.242	54.007	54.249	34.691	34.512
715	65.748	64.687	56.505	59.601	49.599	55.051	48.693	50.649	49.356	54.461	54.465	34.738	34.618
715.5	65.853	64.751	56.581	59.696	49.591	54.967	48.711	50.779	49.526	54.733	54.469	34.83	34.692
716	65.974	64.951	56.703	59.698	49.565	54.949	48.802	51.146	49.758	54.827	54.56	35.054	34.686
716.5	66.097	65.082	56.809	59.786	49.616	54.946	48.931	51.393	50.091	54.939	54.859	35.277	34.731
717	66.266	65.125	56.855	59.791	49.617	54.948	48.935	51.678	50.471	55.093	55.131	35.36	34.856
717.5	66.38	65.055	56.834	59.887	49.659	55.013	48.967	51.694	50.682	55.217	55.293	35.446	35.09
718	66.615	65.089	57.015	60.04	49.715	55.291	49.144	51.832	50.824	55.363	55.372	35.468	35.23
718.5	66.687	65.267	57.251	60.122	49.82	55.447	49.295	52.044	51.149	55.672	55.502	35.497	35.298
719	66.64	65.383	57.335	60.06	49.835	55.44	49.359	52.247	51.41	55.973	55.643	35.485	35.361
719.5	66.561	65.498	57.418	60.084	49.813	55.362	49.279	52.475	51.668	56.133	55.837	35.563	35.447
720	66.678	65.552	57.583	60.117	49.773	55.364	49.184	52.717	51.857	56.201	56.094	35.671	35.512
720.5	66.939	65.565	57.68	60.238	49.836	55.382	49.205	52.946	52.16	56.308	56.29	35.766	35.527
721	67.068	65.435	57.666	60.428	50.012	55.412	49.353	53.036	52.424	56.499	56.461	35.857	35.574
721.5	67.046	65.368	57.665	60.589	50.228	55.515	49.567	53.208	52.646	56.729	56.615	35.925	35.6
722	66.818	65.374	57.709	60.645	50.433	55.602	49.64	53.369	52.826	56.871	56.877	35.926	35.537
722.5	66.734	65.512	57.823	60.611	50.509	55.692	49.498	53.592	52.979	56.984	57.13	35.964	35.502
723	66.79	65.685	57.996	60.661	50.45	55.791	49.4	53.797	53.232	57.208	57.281	36.077	35.587
723.5	67.014	65.815	58.079	60.798	50.374	55.866	49.429	53.994	53.6	57.48	57.324	36.201	35.764
724	67.076	65.757	58.072	60.945	50.284	55.809	49.472	54.167	53.869	57.711	57.392	36.235	35.87
724.5	67.026	65.678	58.05	61.083	50.36	55.711	49.377	54.25	54.041	57.794	57.548	36.283	35.852
725	66.989	65.711	58.058	61.092	50.473	55.65	49.276	54.166	53.983	57.835	57.523	36.347	35.83
725.5	67.042	65.661	58.055	61.063	50.471	55.647	49.321	54.083	53.89	57.783	57.474	36.392	35.835
726	67.034	65.637	57.909	61.032	50.347	55.592	49.443	54.334	54.03	57.918	57.668	36.35	35.976
726.5	66.929	65.621	57.896	61.066	50.258	55.64	49.549	54.746	54.294	58.096	58.015	36.327	36.058
727	66.915	65.726	58.01	61.102	50.301	55.769	49.537	55.033	54.616	58.316	58.285	36.347	36.05
727.5	66.9	65.756	58.303	61.26	50.391	56.011	49.439	55.198	54.805	58.397	58.378	36.465	35.954
728	66.972	65.902	58.561	61.339	50.41	56.146	49.374	55.229	55.012	58.527	58.43	36.593	36.018
728.5	66.981	65.984	58.74	61.369	50.459	56.222	49.524	55.151	55.132	58.808	58.515	36.705	36.196
729	67.12	65.973	58.737	61.359	50.51	56.253	49.666	55.065	55.203	58.97	58.522	36.788	36.339
729.5	67.164	65.827	58.557	61.446	50.593	56.21	49.698	55.154	55.36	59.128	58.658	36.753	36.346
730	67.193	65.844	58.441	61.558	50.675	56.216	49.59	55.411	55.455	59.114	58.734	36.695	36.329
730.5	67.209	65.821	58.532	61.519	50.746	56.173	49.518	55.7	55.498	59.318	58.908	36.724	36.407
731	67.147	65.782	58.514	61.56	50.822	56.142	49.484	55.883	55.478	59.395	58.966	36.844	36.484
731.5	67.098	65.796	58.42	61.547	50.714	56.059	49.538	55.973	55.59	59.384	58.941	36.938	36.453
732	67.019	65.991	58.39	61.636	50.677	56.063	49.72	55.943	55.647	59.284	58.891	37.04	36.377
732.5	67.049	66.196	58.53	61.706	50.778	56.19	49.845	55.943	55.826	59.304	59.036	37.123	36.347
733	66.993	66.181	58.527	61.809	51.058	56.319	50.027	56.052	55.848	59.436	59.312	37.193	36.369
733.5	67.04	66.109	58.507	61.803	51.201	56.318	50.187	56.254	55.956	59.539	59.415	37.2	36.461
734	67.14	66.109	58.577	61.724	51.073	56.238	50.242	56.442	56.092	59.653	59.397	37.215	36.539
734.5	67.318	66.236	58.772	61.702	50.912	56.192	50.153	56.493	56.251	59.721	59.332	37.196	36.55
735	67.411	66.364	58.847	61.77	50.826	56.21	50.061	56.435	56.38	59.919	59.464	37.184	36.531
735.5	67.449	66.407	58.801	61.856	50.928	56.348	49.975	56.418	56.473	60.115	59.659	37.187	36.563
736	67.458	66.444	58.705	61.898	50.956	56.438	49.902	56.586	56.604	60.249	59.854	37.233	36.724
736.5	67.432	66.42	58.719	61.914	50.882	56.31	49.952	56.731	56.597	60.079	59.827	37.248	36.839
737	67.445	66.483	58.879	61.892	50.773	55.997	50.022	56.781	56.544	60.025	59.737	37.266	36.801
737.5	67.59	66.579	59.004	61.916	50.848	55.884	50.089	56.779	56.623	60.137	59.815	37.313	36.758
738	67.665	66.604	58.945	61.946	50.885	55.99	50.147	56.92	56.755	60.343	59.893	37.289	36.685
738.5	67.632	66.602	58.979	62.022	50.955	56.168	50.149	56.987	56.871	60.359	59.908	37.199	36.669
739	67.45	66.49	59.051	62.066	50.883	56.26	50.032	56.946	56.988	60.512	59.92	37.034	36.58
739.5	67.452	66.486	59.016	61.924	50.867	56.13	49.866	56.929	57.075	60.665	59.964	36.995	36.583
740	67.499	66.502	58.826	61.779	50.816	55.989	49.675	57.044	57.056	60.814	59.912	37.056	36.604
740.5	67.544	66.527	58.834	61.764	50.876	55.984	49.639	57.093	56.907	60.715	59.826	37.187	36.674
741	67.571	66.586	59.022	61.791	50.925	56.043	49.746	57.189	56.897	60.609	59.787	37.297	36.733
741.5	67.602	66.601	59.121	61.763	50.979	56.133	49.842	57.212	56.972	60.554	59.888	37.372	36.792
742	67.639	66.598	59.163	61.796	50.976	56.26	49.84	57.112	56.973	60.543	60.038	37.38	36.783
742.5	67.639	66.667	59.165	61.88	50.857	56.405	49.925	56.986	56.94	60.662	60.088	37.271	36.734
743	67.649	66.769	59.104	61.931	50.84	56.472	50.175	57.19	57.003	60.844	60.193	37.194	36.692
743.5	67.747	66.803	59.04	61.977	50.953	56.472	50.346	57.432	57.217	61.06	60.335	37.29	36.755
744	67.813	66.692	59.074	62.094	51.02	56.443	50.203	57.622	57.271	61.058	60.465	37.329	36.77
744.5	67.889	66.649	59.16	62.174	50.892	56.451	50.105	57.696	57.282	60.962	60.489	37.263	36.755
745	67.924	66.727	59.199	62.176	50.779	56.386	50.084	57.801	57.289	60.918	60.598	37.236	36.755
745.5	67.92	66.706	59.232	62.206	50.755	56.343	50.159	57.731	57.345	61.05	60.577	37.304	36.889
746	67.762	66.589	59.24	62.142	50.777	56.302	50.174	57.489	57.295	61.157	60.446	37.389	36.891
746.5	67.512	66.518	59.264	62.189	50.866	56.346	50.152	57.526	57.309	61.199	60.383	37.493	36.833
747	67.363	66.474	59.238	62.197	50.975	56.44	50.134	57.631	57.311	61.165	60.549	37.59	36.737
747.5	67.436	66.507	59.206	62.259	51.009	56.545	49.962	57.835	57.459	61.297	60.833	37.6	36.773
748	67.664	66.525	59.259	62.15	50.996	56.568	49.863	57.781	57.458	61.393	60.846	37.67	36.822
748.5	67.811	66.538	59.355	62.133	51.043	56.539	49.9	57.787	57.486	61.569	60.763	37.747	36.844
749	67.744	66.51	59.43	62.366	51.276	56.671	50.025	57.789	57.53	61.689	60.735	37.795	36.806
749.5	67.485	66.458	59.409	62.672	51.403	56.817	50.004	57.86	57.633	61.686	60.825	37.823	36.799
750	67.455	66.52	59.398	62.61	51.412	56.905	49.941	57.959	57.794	61.656	60.845	37.819	36.866
750.5	67.505	66.556	59.277	62.431	51.239	56.886	49.999	58.129	57.796	61.595	60.735	37.805	36.961
751	67.541	66.618	59.019	62.375	51.177	56.849	50.057	58.125	57.637	61.504	60.569	37.803	37.002
751.5	67.553	66.664	58.935	62.424	51.093	56.755	50.129	58.067	57.441	61.296	60.45	37.825	37.005
752	67.658	66.715	59.069	62.35	51.141	56.763	50.23	57.986	57.431	61.271	60.468	37.827	37.001
752.5	67.826	66.709	59.239	62.253	51.24	56.857	50.377	58.1	57.631	61.44	60.652	37.777	37.016
753	67.915	66.681	59.312	62.193	51.467	56.821	50.461	58.158	57.722	61.568	60.819	37.768	37.035
753.5	67.94	66.668	59.392	62.174	51.506	56.721	50.329	58.303	57.705	61.598	60.945	37.764	36.988
754	67.825	66.711	59.456	62.162	51.438	56.698	50.105	58.39	57.723	61.585	60.988	37.714	36.928
754.5	67.692	66.87	59.392	62.138	51.341	56.626	49.941	58.449	57.894	61.671	61.019	37.629	36.836
755	67.61	67.019	59.264	62.235	51.366	56.482	49.989	58.336	57.88	61.645	61.03	37.595	36.854
755.5	67.789	67.122	59.208	62.338	51.398	56.384	50.027	58.196	57.723	61.391	60.919	37.652	36.994
756	67.993	67.158	59.347	62.361	51.422	56.467	50.067	58.134	57.623	61.286	60.872	37.788	37.1
756.5	67.88	67.04	59.353	62.356	51.41	56.613	50.017	58.251	57.723	61.398	60.898	37.848	37.116
757	67.668	66.855	59.344	62.404	51.406	56.826	49.919	58.371	57.593	61.579	60.934	37.884	37.144
757.5	67.559	66.745	59.304	62.47	51.498	56.887	49.966	58.409	57.34	61.625	60.91	37.924	37.123
758	67.68	66.763	59.38	62.301	51.555	56.826	50.084	58.375	57.185	61.653	60.84	37.996	37.046
758.5	67.732	66.799	59.372	62.097	51.513	56.654	50.205	58.499	57.347	61.795	60.921	38.057	37.038
759	67.81	66.956	59.413	62.049	51.428	56.671	50.033	58.556	57.465	61.699	60.957	37.976	37.115
759.5	67.827	67.037	59.358	62.27	51.457	56.793	49.882	58.596	57.552	61.615	61.04	37.93	37.173
760	67.891	66.967	59.334	62.487	51.433	56.882	49.878	58.436	57.467	61.398	61.016	37.946	37.235
760.5	67.927	66.894	59.345	62.521	51.349	56.834	49.907	58.388	57.395	61.325	60.919	37.992	37.276
761	67.973	66.964	59.491	62.367	51.234	56.75	49.982	58.392	57.273	61.279	60.724	37.93	37.249
761.5	67.906	67.039	59.596	62.133	51.217	56.673	49.965	58.474	57.295	61.431	60.58	37.877	37.122
762	67.833	67.07	59.566	62.094	51.239	56.519	50.008	58.583	57.416	61.583	60.565	37.881	36.998
762.5	67.759	67.111	59.405	62.105	51.281	56.497	49.966	58.709	57.626	61.746	60.731	37.85	36.949
763	67.74	67.196	59.429	62.26	51.303	56.652	50.048	58.73	57.629	61.85	60.822	37.818	37.049
763.5	67.682	67.194	59.531	62.336	51.295	56.819	50.204	58.643	57.524	61.864	60.893	37.831	37.155
764	67.655	67.106	59.541	62.383	51.258	56.884	50.174	58.582	57.45	61.901	60.871	37.89	37.093
764.5	67.657	67.065	59.459	62.301	51.189	56.862	49.956	58.656	57.515	61.915	60.939	37.967	37.033
765	67.701	67.079	59.347	62.315	51.227	56.928	49.742	58.711	57.592	61.857	61.012	37.934	36.975
765.5	67.695	67.082	59.284	62.325	51.242	56.824	49.839	58.649	57.592	61.76	61.049	37.826	36.923
766	67.808	67.046	59.283	62.237	51.223	56.772	49.993	58.615	57.557	61.854	61.029	37.826	36.852
766.5	67.89	66.925	59.261	62.127	51.173	56.853	50.076	58.688	57.607	61.955	61.041	37.828	36.932
767	67.807	66.738	59.171	62.189	51.175	56.948	50.102	58.692	57.695	61.972	60.992	37.842	37.097
767.5	67.639	66.762	59.158	62.312	51.188	57.06	50.175	58.795	57.856	61.877	60.957	37.838	37.16
768	67.568	66.956	59.394	62.363	51.242	57.054	50.197	58.982	57.83	61.875	60.975	37.963	37.134
768.5	67.62	67.061	59.531	62.403	51.379	57.077	50.153	59.106	57.735	61.856	61.035	38.014	37.077
769	67.794	67.066	59.619	62.457	51.52	56.987	50.016	59.211	57.71	62.031	61.047	38.18	37.153
769.5	67.801	67.035	59.572	62.37	51.523	56.833	50.025	59.333	57.819	62.224	61.173	38.312	37.18
770	67.65	67.012	59.489	62.255	51.471	56.671	50.003	59.352	57.919	62.262	61.269	38.333	37.172
770.5	67.451	66.927	59.472	62.171	51.47	56.687	50.1	59.165	57.936	62.335	61.448	38.245	37.167
771	67.534	66.951	59.448	62.247	51.56	56.901	50.075	58.946	57.799	62.298	61.419	38.177	37.12
771.5	67.693	67.02	59.394	62.394	51.661	57.112	50.102	58.799	57.678	62.16	61.269	38.144	36.979
772	67.815	67.051	59.272	62.508	51.607	57.131	49.982	58.696	57.588	61.895	61.076	38.157	36.772
772.5	67.794	66.987	59.137	62.615	51.471	57.044	50.091	58.704	57.637	62.019	61.208	38.217	36.742
773	67.875	67.108	59.142	62.588	51.382	56.989	50.113	58.872	57.623	62.243	61.439	38.204	36.905
773.5	68.069	67.241	59.243	62.51	51.375	56.929	50.109	58.989	57.549	62.217	61.467	38.139	37.097
774	68.184	67.33	59.379	62.439	51.322	56.899	50.182	58.964	57.45	62.078	61.319	38.072	37.16
774.5	68.255	67.441	59.408	62.501	51.366	56.937	50.21	58.994	57.491	62.031	61.173	38.034	37.13
775	68.187	67.487	59.477	62.515	51.322	57.022	50.097	59.057	57.439	62.092	61.132	38.108	37.113
775.5	67.951	67.342	59.427	62.567	51.381	57.265	49.806	59.043	57.383	62.141	61.167	38.169	37.18
776	67.607	67.174	59.334	62.54	51.425	57.377	49.741	59.093	57.464	62.273	61.309	38.232	37.246
776.5	67.406	67.246	59.28	62.533	51.54	57.333	49.77	59.22	57.623	62.407	61.459	38.182	37.253
777	67.357	67.308	59.343	62.502	51.645	57.182	49.85	59.357	57.544	62.45	61.57	38.174	37.208
777.5	67.44	67.255	59.393	62.509	51.686	57.205	49.842	59.352	57.416	62.513	61.568	38.154	37.231
778	67.572	67.137	59.454	62.386	51.564	57.193	49.834	59.232	57.374	62.547	61.432	38.085	37.203
778.5	67.714	67.079	59.468	62.277	51.368	57.111	49.835	59.137	57.486	62.41	61.28	38.008	37.173
779	67.691	67.189	59.402	62.29	51.415	57.098	49.772	59.056	57.6	62.252	61.202	38.021	37.07
779.5	67.605	67.248	59.315	62.48	51.496	57.315	49.762	59.059	57.598	62.138	61.174	38.041	36.999
780	67.658	67.323	59.431	62.445	51.474	57.376	49.795	59.198	57.521	62.29	61.182	38.088	36.959
780.5	67.639	67.426	59.563	62.401	51.405	57.331	49.772	59.426	57.476	62.386	61.326	38.077	37.033
781	67.527	67.477	59.548	62.345	51.4	57.256	49.728	59.567	57.459	62.454	61.479	38.043	37.114
781.5	67.467	67.368	59.507	62.317	51.354	57.189	49.789	59.545	57.416	62.474	61.54	37.953	37.151
782	67.569	67.318	59.503	62.231	51.23	56.949	49.927	59.488	57.497	62.531	61.445	37.947	37.174
782.5	67.722	67.315	59.532	62.216	51.177	56.745	50.075	59.454	57.644	62.578	61.443	37.98	37.119
783	67.908	67.205	59.522	62.319	51.272	56.742	50.125	59.604	57.727	62.587	61.556	38.033	37.02
783.5	68.104	67.27	59.531	62.361	51.448	56.918	50.091	59.637	57.731	62.697	61.638	38.063	37.021
784	68.116	67.308	59.603	62.433	51.547	57.184	50.043	59.642	57.746	62.679	61.438	38.041	37.045
784.5	68.031	67.304	59.572	62.484	51.524	57.287	50.17	59.54	57.824	62.554	61.321	38.105	36.999
785	67.909	67.314	59.598	62.545	51.421	57.173	50.214	59.655	57.781	62.264	61.244	38.161	37.03
785.5	67.79	67.32	59.516	62.57	51.336	56.924	50.113	59.701	57.618	62.241	61.323	38.231	37.138
786	67.722	67.354	59.508	62.485	51.418	56.886	49.926	59.616	57.647	62.326	61.367	38.249	37.216
786.5	67.833	67.424	59.464	62.462	51.536	57.055	49.908	59.397	57.61	62.366	61.401	38.289	37.214
787	68.057	67.464	59.449	62.553	51.499	57.206	49.974	59.399	57.531	62.291	61.419	38.236	37.309
787.5	68.108	67.411	59.441	62.648	51.441	57.246	50.1	59.544	57.467	62.31	61.43	38.109	37.369
788	68.007	67.321	59.413	62.606	51.416	57.303	50.234	59.729	57.559	62.326	61.422	38.037	37.364
788.5	67.861	67.188	59.37	62.391	51.472	57.223	50.194	59.778	57.626	62.341	61.377	38.161	37.292
789	67.753	67.034	59.311	62.283	51.363	57.065	50.068	59.736	57.603	62.381	61.507	38.282	37.323
789.5	67.859	67.054	59.371	62.403	51.292	57.088	50.012	59.752	57.676	62.537	61.718	38.281	37.245
790	67.889	67.169	59.408	62.521	51.194	57.172	50.149	59.678	57.627	62.474	61.65	38.219	37.164
790.5	67.868	67.209	59.289	62.375	51.262	57.181	50.125	59.739	57.617	62.3	61.406	38.196	37.066
791	67.72	67.141	59.125	62.151	51.313	56.982	49.938	59.699	57.532	62.249	61.268	38.222	37.087
791.5	67.803	67.283	59.267	62.2	51.362	56.963	49.715	59.736	57.525	62.31	61.293	38.283	37.089
792	68.035	67.513	59.56	62.383	51.431	57.112	49.698	59.778	57.575	62.385	61.411	38.302	37.152
792.5	68.229	67.724	59.765	62.422	51.516	57.198	49.837	59.812	57.619	62.513	61.562	38.228	37.221
793	68.105	67.611	59.711	62.348	51.537	57.151	50.024	59.806	57.776	62.674	61.585	38.192	37.339
793.5	67.931	67.366	59.515	62.348	51.574	57.129	50.154	59.791	57.847	62.817	61.466	38.23	37.39
794	67.793	67.239	59.5	62.366	51.639	57.191	50.054	59.771	57.857	62.81	61.241	38.268	37.438
794.5	67.961	67.279	59.568	62.345	51.681	57.268	49.878	59.832	57.88	62.766	61.277	38.211	37.358
795	67.916	67.276	59.493	62.31	51.548	57.258	49.711	59.848	57.835	62.566	61.313	38.206	37.317
795.5	67.822	67.086	59.364	62.389	51.512	57.256	49.744	59.785	57.711	62.388	61.396	38.259	37.274
796	67.748	67.169	59.315	62.417	51.422	57.251	49.815	59.711	57.586	62.331	61.347	38.288	37.236
796.5	67.881	67.421	59.296	62.457	51.445	57.273	49.849	59.769	57.41	62.391	61.245	38.19	37.174
797	67.851	67.531	59.21	62.427	51.54	57.155	49.908	59.819	57.274	62.465	61.226	38.057	37.123
797.5	67.785	67.519	59.213	62.522	51.709	57.094	49.961	59.932	57.421	62.652	61.384	38.046	37.181
798	67.828	67.539	59.435	62.571	51.744	57.188	49.923	60.15	57.618	62.846	61.664	38.143	37.298
798.5	67.947	67.651	59.692	62.608	51.76	57.323	49.835	60.339	57.735	62.91	61.818	38.207	37.305
799	67.912	67.599	59.658	62.573	51.761	57.282	49.759	60.168	57.479	62.558	61.76	38.154	37.166
799.5	67.858	67.701	59.457	62.629	51.745	57.234	49.881	60.066	57.385	62.496	61.809	38.2	37.087
800	67.993	67.584	59.301	62.571	51.722	57.315	50.015	60.191	57.468	62.771	61.789	38.293	37.111
800.5	68.106	67.69	59.41	62.713	51.783	57.44	49.966	60.331	57.604	62.857	61.701	38.333	37.186
801	68.231	67.763	59.469	62.654	51.691	57.415	49.758	60.366	57.71	62.812	61.632	38.363	37.298
801.5	68.195	67.961	59.601	62.517	51.542	57.223	49.763	60.289	57.728	62.781	61.625	38.342	37.421
802	68.016	67.921	59.609	62.352	51.473	57.061	49.898	60.398	57.748	62.837	61.552	38.331	37.462
802.5	67.824	67.703	59.589	62.421	51.559	57.166	49.878	60.524	57.861	62.96	61.619	38.297	37.458
803	67.888	67.491	59.451	62.596	51.549	57.272	49.865	60.542	58.02	63.054	61.739	38.23	37.411
803.5	68.115	67.539	59.377	62.631	51.515	57.318	49.915	60.493	58.083	63.033	61.771	38.192	37.283
804	68.309	67.587	59.354	62.587	51.53	57.319	49.941	60.44	57.901	62.864	61.635	38.204	37.143
804.5	68.42	67.615	59.403	62.464	51.578	57.436	49.883	60.305	57.685	62.66	61.475	38.194	37.159
805	68.432	67.69	59.47	62.38	51.604	57.45	49.862	60.16	57.681	62.69	61.406	38.232	37.303
805.5	68.304	67.821	59.568	62.39	51.592	57.395	49.763	60.128	57.812	62.836	61.342	38.278	37.369
806	68.116	67.904	59.579	62.436	51.471	57.301	49.646	60.157	57.827	62.985	61.377	38.297	37.319
806.5	68.164	67.842	59.566	62.535	51.347	57.218	49.61	60.153	57.72	62.923	61.355	38.214	37.069
807	68.271	67.671	59.638	62.493	51.439	57.175	49.684	60.168	57.561	62.83	61.397	38.094	36.968
807.5	68.182	67.554	59.641	62.463	51.587	57.226	49.692	60.056	57.52	62.655	61.458	38.11	37.03
808	68.14	67.529	59.602	62.369	51.632	57.364	49.691	59.984	57.52	62.51	61.548	38.185	37.163
808.5	68.007	67.573	59.378	62.316	51.57	57.281	49.678	60.067	57.679	62.687	61.669	38.252	37.179
809	67.836	67.537	59.406	62.219	51.505	57.028	49.714	60.246	57.785	62.814	61.754	38.278	37.131
809.5	67.655	67.535	59.342	62.268	51.382	57.091	49.824	60.468	57.861	62.81	61.759	38.284	36.96
810	67.698	67.45	59.432	62.404	51.492	57.26	49.757	60.602	57.852	62.823	61.588	38.288	36.941
810.5	67.779	67.477	59.481	62.502	51.637	57.236	49.617	60.638	57.782	62.915	61.526	38.264	37.045
811	67.853	67.607	59.562	62.687	51.826	57.239	49.522	60.534	57.718	62.906	61.661	38.213	37.174
811.5	67.794	67.493	59.459	62.892	51.883	57.352	49.507	60.267	57.814	62.74	61.777	38.299	37.246
812	67.761	67.45	59.402	62.838	51.769	57.332	49.503	60.005	57.884	62.7	61.761	38.352	37.255
812.5	67.753	67.514	59.361	62.658	51.585	57.06	49.496	60.022	57.872	62.698	61.628	38.292	37.204
813	67.694	67.552	59.177	62.684	51.665	56.973	49.653	60.26	57.811	62.841	61.633	38.159	37.067
813.5	67.721	67.415	59.068	62.737	51.697	57.102	49.827	60.46	57.743	63.026	61.673	38.161	36.954
814	67.829	67.356	59.068	62.609	51.756	57.33	49.824	60.477	57.718	63.162	61.644	38.1	36.84
814.5	67.99	67.439	59.215	62.419	51.621	57.384	49.781	60.448	57.845	63.121	61.535	38.109	36.938
815	67.988	67.652	59.27	62.376	51.452	57.32	49.803	60.387	57.961	63.047	61.493	38.208	37.172
815.5	67.994	67.819	59.398	62.388	51.313	57.186	49.847	60.357	57.916	63.079	61.682	38.327	37.348
816	68.017	67.907	59.469	62.432	51.464	57.254	49.822	60.431	57.728	63.19	61.8	38.327	37.222
816.5	67.963	67.795	59.381	62.435	51.589	57.255	49.776	60.454	57.563	63.146	61.83	38.33	37.064
817	67.698	67.554	59.25	62.53	51.589	57.16	49.698	60.566	57.554	63.031	61.728	38.326	37.025
817.5	67.549	67.466	59.189	62.556	51.624	57.153	49.542	60.558	57.579	62.871	61.658	38.296	37.093
818	67.476	67.458	59.239	62.602	51.669	57.2	49.561	60.661	57.734	62.914	61.707	38.372	37.242
818.5	67.546	67.54	59.222	62.711	51.674	57.265	49.562	60.625	57.782	62.907	61.705	38.493	37.396
819	67.757	67.585	59.348	62.752	51.632	57.101	49.683	60.639	57.92	63.027	61.769	38.413	37.409
819.5	68.064	67.688	59.518	62.598	51.58	57.022	49.875	60.449	58.151	63.032	61.699	38.269	37.221
820	68.138	67.783	59.526	62.415	51.571	56.906	49.925	60.34	58.046	62.922	61.658	38.21	37.071
820.5	68.179	67.796	59.325	62.228	51.543	56.952	49.799	60.326	57.761	62.804	61.654	38.256	37.045
821	68.082	67.714	59.231	62.148	51.539	56.977	49.624	60.492	57.638	62.98	61.709	38.328	37.104
821.5	68.027	67.598	59.376	62.229	51.598	57.066	49.573	60.527	57.636	63.08	61.574	38.231	37.12
822	68.022	67.55	59.492	62.346	51.528	57.224	49.452	60.597	57.606	63.141	61.604	38.223	37.022
822.5	68.007	67.742	59.613	62.405	51.346	57.281	49.299	60.564	57.607	63.123	61.777	38.203	37.002
823	68.007	67.943	59.457	62.497	51.269	57.36	49.216	60.697	57.609	63.099	61.948	38.275	37.138
823.5	68.008	67.896	59.359	62.603	51.363	57.341	49.387	60.879	57.623	63.133	61.905	38.254	37.242
824	67.975	67.743	59.292	62.366	51.348	57.105	49.679	60.9	57.509	63.157	61.822	38.347	37.295
824.5	67.939	67.655	59.184	62.082	51.359	56.911	49.832	60.844	57.458	63.217	61.856	38.359	37.342
825	67.836	67.679	59.074	62.105	51.35	56.949	49.897	60.757	57.52	63.082	61.77	38.355	37.342
825.5	67.894	67.702	59.074	62.161	51.238	57	49.86	60.677	57.668	62.986	61.557	38.312	37.341
826	67.906	67.732	59.062	62.101	51.111	57.009	49.799	60.762	57.678	63.004	61.51	38.368	37.275
826.5	67.975	67.886	59.047	62.114	51.29	56.977	49.675	60.984	57.676	63.204	61.58	38.362	37.222
827	68.068	68.002	59.17	62.162	51.504	57.062	49.612	61.08	57.794	63.231	61.829	38.226	37.062
827.5	68.096	68.061	59.367	62.358	51.581	57.192	49.556	60.989	57.974	63.091	61.864	38.131	37.007
828	67.967	67.915	59.479	62.473	51.555	57.275	49.515	60.863	57.94	62.937	61.717	38.129	36.974
828.5	67.732	67.813	59.4	62.387	51.412	57.278	49.577	60.862	57.703	62.89	61.557	38.162	37.021
829	67.539	67.586	59.296	62.206	51.213	57.073	49.584	60.804	57.544	62.879	61.503	38.264	36.998
829.5	67.494	67.55	59.332	62.234	51.19	57.045	49.57	60.681	57.494	62.824	61.636	38.335	37.023
830	67.674	67.594	59.43	62.138	51.164	57.154	49.517	60.635	57.418	62.72	61.723	38.268	37.026
830.5	67.857	67.728	59.45	62.05	51.124	57.27	49.486	60.767	57.324	62.741	61.734	38.218	37.055
831	67.865	67.648	59.295	61.975	51.116	57.078	49.412	60.811	57.355	62.822	61.532	38.177	37.126
831.5	67.76	67.508	59.213	62.01	51.232	56.909	49.576	60.866	57.625	63.057	61.618	38.12	37.144
832	67.755	67.577	59.274	62.047	51.283	56.763	49.703	60.768	57.769	63.183	61.621	38.118	37.147
832.5	67.843	67.853	59.533	62.1	51.295	56.777	49.608	60.746	57.836	63.188	61.715	38.122	37.152
833	67.86	67.983	59.61	62.056	51.274	56.86	49.452	60.709	57.684	63.152	61.443	38.123	37.168
833.5	67.766	67.906	59.509	61.98	51.359	56.936	49.355	60.87	57.618	63.254	61.474	38.108	37.21
834	67.674	67.729	59.318	61.903	51.386	56.856	49.378	60.732	57.485	63.191	61.485	38.092	37.236
834.5	67.724	67.736	59.194	62.047	51.294	56.82	49.44	60.564	57.323	62.992	61.551	38.042	37.159
835	67.928	67.714	59.219	62.206	51.199	56.956	49.506	60.476	57.262	62.859	61.591	38.005	37.055
835.5	68.016	67.633	59.171	62.24	51.201	56.974	49.433	60.483	57.347	62.785	61.479	37.996	37.186
836	68.07	67.626	59.118	62.275	51.139	56.911	49.43	60.574	57.54	62.833	61.324	37.977	37.193
836.5	68.109	67.798	59.163	62.383	51.073	56.733	49.406	60.689	57.789	62.931	61.315	38.029	37.123
837	68.132	67.771	59.203	62.348	51.095	56.645	49.28	60.914	57.985	63.149	61.511	38.066	37.046
837.5	68.084	67.671	59.042	62.244	51.189	56.653	49.101	61.077	57.99	63.344	61.792	38.039	37.032
838	68.155	67.715	59.042	62.141	51.167	56.736	49.115	61.188	57.902	63.399	61.859	37.997	37.032
838.5	68.137	67.789	59.072	62.033	51.098	56.925	49.25	61.054	57.801	63.282	61.662	37.961	36.961
839	68.134	67.756	59.199	62.1	50.99	57.153	49.361	60.923	57.83	63.208	61.488	38.031	37.002
839.5	68.234	67.816	59.233	62.251	50.943	57.29	49.311	61.038	57.912	63.117	61.716	38.223	37.071
840	68.361	67.886	59.303	62.31	51.032	57.156	49.168	61.242	57.781	63.032	61.883	38.281	37.058
840.5	68.291	67.894	59.329	62.283	51.139	57.025	49.056	61.107	57.46	62.857	61.875	38.226	37.006
841	68.117	67.927	59.434	62.301	51.218	56.979	49.151	60.949	57.488	62.672	61.76	38.206	37.043
841.5	68.138	67.986	59.413	62.233	51.262	56.965	49.197	61.144	57.72	62.771	61.696	38.103	36.987
842	68.27	68.085	59.197	62.322	51.241	57.054	49.306	61.232	57.772	62.96	61.626	37.981	37.047
842.5	68.098	67.987	59.119	62.494	51.196	57.065	49.409	61.124	57.531	62.952	61.498	37.987	37.103
843	67.949	67.869	59.319	62.452	51.217	57.11	49.449	60.959	57.574	62.875	61.453	38.145	36.965
843.5	67.892	67.669	59.424	62.116	51.166	57.082	49.372	60.923	57.678	62.908	61.424	38.397	36.996
844	68.13	67.896	59.41	61.688	51.032	56.992	49.292	60.961	57.795	63.089	61.465	38.472	37.174
844.5	68.166	68.083	59.36	61.56	51.061	57.046	49.368	61.04	57.906	63.261	61.498	38.344	37.355
845	68.078	68.147	59.306	61.869	51.201	57.05	49.394	61.204	58.045	63.446	61.705	38.219	37.335
845.5	67.884	68.042	59.075	62.183	51.253	56.898	49.294	61.333	58.044	63.427	61.867	38.251	37.265
846	67.687	67.872	58.856	62.078	51.106	56.847	49.335	61.314	57.888	63.365	61.669	38.289	37.169
846.5	67.662	67.808	58.94	61.91	51.009	56.986	49.568	61.284	57.862	63.3	61.475	38.235	37.219
847	67.885	67.981	59.283	61.903	50.946	56.812	49.671	61.208	57.829	63.217	61.504	38.268	37.301
847.5	68.027	68.123	59.403	61.825	50.932	56.643	49.452	61.147	57.808	63.048	61.613	38.327	37.353
848	68.077	67.978	59.211	61.671	50.89	56.494	49.271	61.244	58.07	63.155	62.02	38.425	37.244
848.5	26.448	26.348	22.948	23.985	19.748	22.043	19.269	23.742	22.6	24.661	24.201	14.918	14.459
