# Supplementary material for: Tomato yellow leaf curl virus manipulates Bemisia tabaci, MEAM1 both directly and indirectly through changes in visual and volatile cues
Source: PeerJ. 2024 Jul 23;12:e17665. doi: 10.7717/peerj.17665 (PMC11276755; doi:10.7717/peerj.17665)
Supplement: Supplemental Information 9 [file peerj-12-17665-s009.xlsx]

## Sheet: Sheet1
wavelength	control leaf. 2.2.21.a.green1	control leaf. 2.2.21.b.green1	control leaf. 2.3.21.a.green1	control leaf. 2.3.21.b.green2	control leaves 2. 9 .21b1	d13.feb10.healthy.a.1
184	0.001	0.001	0.001	0.001	0.001	0.001
184.5	0.001	0.001	0.001	0.001	0.001	0.001
185	0.001	0.001	0.001	0.001	0.001	0.001
185.5	0.001	0.001	0.001	0.001	0.001	0.001
186	0.001	0.001	0.001	0.001	0.001	0.001
186.5	0.001	0.001	0.001	0.001	0.001	0.001
187	0.001	0.001	0.001	0.001	0.001	0.001
187.5	0.001	0.001	0.001	0.001	0.001	0.001
188	0.001	0.001	0.001	0.001	0.001	0.001
188.5	0.001	0.001	0.001	0.001	0.001	0.001
189	0.001	0.001	0.001	0.001	0.001	0.001
189.5	120.97	135.48	126.61	148.39	252.31	277.71
190	295.16	285.9	298.44	355.33	-3072.8	-3412.8
190.5	-3572	-2796.4	-3085.9	-4075.5	-189.21	-209.72
191	-614.54	-435.23	-578.64	-641.34	-112.57	-141.41
191.5	-506.8	-385.04	-526.6	-600.67	-118.44	-164.6
192	-772.19	-691.7	-790.59	-854.33	-108.29	-138.55
192.5	-1594.4	-1537.8	-1649.8	-1699.8	-93.268	-109.67
193	-3838.4	-3927	-4021.2	-4147	-82.909	-96.35
193.5	-4043.3	-4297.3	-4328.5	-4534.2	-76.858	-92.193
194	-1224.8	-1349.9	-1359.4	-1498.9	-79.807	-102.3
194.5	-668.93	-744.26	-745.51	-862.38	-103.95	-126.94
195	-737.5	-839.17	-842.79	-943.37	-145.21	-155.81
195.5	-892.94	-970.64	-1010.8	-1058.6	-175.18	-183.86
196	4044	4108.4	4625.3	4597	-211.16	-218.46
196.5	3161	3132.1	3548.9	3563.8	-208.94	-219.26
197	2078	1816.3	2189.9	2234.8	-172.01	-193.54
197.5	1590.9	1285.3	1666.4	1690.4	-152.81	-165.03
198	31103	25838	32612	32082	-140.71	-142.83
198.5	15417	12776	16112	15910	-137.46	-143.31
199	-1161.1	-1008.3	-1258.4	-1131.7	-128.06	-146.03
199.5	-848.27	-745.49	-888.67	-799.28	-121.18	-147.89
200	-866.65	-761.24	-891.6	-812.92	-106.1	-132.75
200.5	-929.24	-798.77	-944.43	-882.39	-89.397	-115.98
201	-997.84	-890.07	-1084.2	-1031.4	-87.3	-113.19
201.5	-1262.4	-1142.7	-1448.8	-1378.3	-92.158	-120.67
202	-861.31	-755.6	-1003.5	-955.54	-101.39	-137.64
202.5	-638.56	-544.49	-738.97	-701.69	-111.83	-154.94
203	-535.11	-463.63	-594.66	-567.55	-115.93	-156.7
203.5	-448.98	-419.44	-496.11	-473.81	-102.19	-137.28
204	-543.47	-546.55	-621.43	-587.48	-96.846	-141.05
204.5	-1057.8	-1122	-1270.5	-1175	-95.343	-143.9
205	4146	4555	5318.4	4668.3	-92.278	-133.86
205.5	2513.5	2730	3352.3	2819.1	-92.206	-127.09
206	3912.1	4136.5	5172.3	4343.8	-85.724	-104.75
206.5	-2395	-2497.3	-3018.6	-2795.9	-72.742	-78.449
207	-764.68	-740.75	-904.54	-916.47	-56.66	-62.025
207.5	-617.41	-567.99	-657.94	-737.88	-50.462	-55.178
208	-513.25	-461.79	-521.81	-607.88	-49.972	-53.152
208.5	-364.99	-330.04	-363.93	-427.29	-61.23	-65.974
209	-301.75	-292.98	-311.51	-364.32	-77.502	-80.756
209.5	-297.03	-301.54	-335.31	-376.94	-87.128	-91.74
210	-346.94	-358.71	-433.76	-458.23	-85.284	-97.689
210.5	-442.94	-478.35	-594.04	-611.4	-67.054	-89.551
211	-394.42	-422.23	-537.05	-548.76	-56.441	-87.274
211.5	-260.91	-272.48	-356.1	-354.15	-55.283	-91.784
212	-208.78	-224.49	-282.6	-283.8	-64.351	-105.82
212.5	-218.28	-221.22	-288.44	-278.24	-77.995	-117.39
213	-231.8	-215.26	-290.93	-272.87	-84.009	-116.71
213.5	-257.65	-231.46	-311.94	-302.44	-81.015	-108.32
214	-269.39	-232.05	-326.35	-316.31	-74.665	-89.334
214.5	-264.99	-220.32	-305.78	-308.29	-69.25	-71.995
215	-333.13	-299.04	-390.07	-411.31	-68.479	-66.736
215.5	-496.74	-476.62	-590.18	-639.25	-70.066	-65.3
216	-582.83	-586.95	-684.86	-765.67	-71.005	-70.138
216.5	-568.16	-594.62	-679.6	-762.18	-74.266	-80.284
217	-485.38	-482.82	-577.16	-638.72	-72.691	-76.518
217.5	-405	-357.41	-462.85	-497.47	-62.648	-64.149
218	-421.19	-355	-485.27	-488.32	-52.991	-53.249
218.5	-398.4	-318.3	-458.95	-433.8	-41.975	-46.57
219	-390.42	-309	-440.01	-397.32	-33.768	-50.127
219.5	-334.99	-280.48	-375.92	-332.18	-35.754	-60.187
220	-258.06	-226.03	-284.49	-249.74	-43.054	-68.964
220.5	-233.67	-217.48	-255.71	-239.96	-56.008	-75.153
221	-193.82	-187.84	-217.91	-215.92	-69.767	-74.107
221.5	-168.36	-160.92	-191.99	-199.3	-72.044	-66.571
222	-185.37	-160.56	-204.57	-226.19	-67.947	-58.572
222.5	-212.35	-162.89	-234.48	-253.95	-66.965	-57.274
223	-254.17	-180.14	-277.69	-294.63	-65.881	-57.633
223.5	-334.57	-237.48	-361.17	-380.75	-65.242	-60.063
224	-380.24	-288.56	-404.06	-432.13	-64.006	-64.83
224.5	-454.53	-384.9	-485.58	-521.94	-63.03	-67.745
225	-533.21	-480.11	-582.48	-621.49	-63.138	-70.02
225.5	-437.74	-402.73	-491.97	-505.75	-59.718	-67.385
226	-379.08	-350.44	-436.29	-432.25	-54.441	-62.903
226.5	-351.84	-325.52	-390.24	-393.94	-50.673	-58.408
227	-305.84	-281.8	-329.32	-336.94	-43.321	-51.373
227.5	-278.48	-257.26	-292.63	-315.68	-38.677	-47.235
228	-234.74	-216.75	-251.05	-274.76	-36.736	-44.903
228.5	-194.54	-173.59	-221.28	-237.64	-27.144	-35.799
229	-156.7	-133.67	-185.32	-193.41	-17.601	-26.413
229.5	-128.94	-112.47	-157.59	-159.4	-9.6628	-17.286
230	-108.57	-94.487	-128.92	-135.48	-3.2721	-7.988
230.5	-76.748	-64.927	-87.288	-96.453	0.18717	-3.7672
231	-53.068	-43.941	-56.189	-69.015	3.1189	-0.39258
231.5	-37.394	-25.838	-37.596	-49	6.6276	2.9633
232	-23.135	-12.211	-24.666	-32.96	11.975	6.9983
232.5	-12.171	-5.8388	-15.867	-23.809	16.173	11.185
233	-3.3013	-0.40851	-8.9689	-17.939	18.516	13.914
233.5	4.0443	4.9542	-2.0764	-12.093	20.259	16.101
234	10.023	10.414	4.0022	-4.6609	21.726	18.292
234.5	15.156	17.145	9.8296	4.1941	23.481	20.973
235	19.396	23.195	14.942	12.249	25.427	23.835
235.5	22.625	26.921	19.754	18.883	27.193	26.354
236	25.337	29.285	23.861	23.467	28.282	27.837
236.5	27.363	30.578	27.35	25.818	28.851	28.425
237	28.727	30.477	30.088	27.274	29.3	28.886
237.5	29.89	30.565	31.894	28.381	29.606	29.05
238	31.028	31.082	33.26	29.328	29.848	29.227
238.5	31.9	31.611	33.884	30.162	30.032	29.727
239	32.427	32.443	34.243	31.34	30.094	29.924
239.5	32.649	33.352	34.64	32.335	30.054	29.949
240	32.492	33.841	34.895	32.856	29.949	29.919
240.5	32.496	34.027	34.92	33.235	29.816	29.622
241	32.637	33.985	35.017	33.34	29.752	29.421
241.5	33.061	34.079	35.233	33.461	29.709	29.302
242	33.461	34.228	35.417	33.894	29.652	29.14
242.5	33.518	34.098	35.592	34.223	29.626	29.104
243	33.539	34.153	35.702	34.423	29.587	29.17
243.5	33.52	34.075	35.844	34.554	29.613	29.202
244	33.59	34.085	35.951	34.411	29.657	29.314
244.5	33.584	34.167	35.92	34.304	29.662	29.328
245	33.497	33.983	35.789	34.112	29.697	29.192
245.5	33.357	33.628	35.478	33.829	29.642	29.179
246	33.201	33.269	35.146	33.768	29.553	29.162
246.5	33.18	33.097	35.029	33.813	29.467	29.103
247	33.124	32.945	34.903	33.855	29.361	29.052
247.5	32.983	32.955	34.837	33.854	29.265	28.854
248	32.868	32.979	34.749	33.71	29.161	28.591
248.5	32.794	33.005	34.704	33.448	29.119	28.409
249	32.813	33.025	34.728	33.251	29.079	28.335
249.5	32.781	32.919	34.575	33.041	28.965	28.355
250	32.538	32.706	34.463	32.851	28.873	28.397
250.5	32.173	32.492	34.289	32.777	28.785	28.375
251	31.92	32.502	34.189	32.74	28.679	28.227
251.5	31.875	32.591	34.18	32.667	28.643	28.069
252	31.906	32.546	34.023	32.59	28.571	27.925
252.5	31.994	32.491	33.886	32.476	28.435	27.821
253	31.934	32.294	33.727	32.373	28.35	27.785
253.5	31.703	31.907	33.565	32.306	28.234	27.699
254	31.573	31.69	33.604	32.328	28.133	27.544
254.5	31.402	31.549	33.622	32.374	28.06	27.371
255	31.255	31.456	33.526	32.317	27.928	27.179
255.5	31.19	31.492	33.461	32.32	27.835	27.042
256	31.049	31.393	33.302	32.225	27.725	26.977
256.5	30.93	31.153	33.058	31.942	27.582	26.86
257	30.831	30.913	32.86	31.714	27.521	26.763
257.5	30.737	30.758	32.76	31.49	27.456	26.629
258	30.661	30.723	32.618	31.302	27.359	26.48
258.5	30.563	30.691	32.511	31.214	27.253	26.427
259	30.521	30.638	32.482	31.14	27.06	26.347
259.5	30.479	30.497	32.438	31.05	26.902	26.296
260	30.395	30.265	32.485	31.011	26.758	26.241
260.5	30.352	30.119	32.553	30.932	26.624	26.098
261	30.207	30.052	32.416	30.794	26.53	25.969
261.5	30.027	30.068	32.265	30.697	26.421	25.814
262	29.966	30.085	32.109	30.593	26.309	25.642
262.5	29.899	29.924	31.971	30.542	26.195	25.478
263	29.917	29.803	32.036	30.529	26.072	25.31
263.5	29.899	29.786	32.044	30.404	25.977	25.182
264	29.796	29.74	31.966	30.242	25.921	25.127
264.5	29.681	29.744	31.849	30.174	25.864	25.134
265	29.507	29.562	31.646	30.096	25.807	25.179
265.5	29.37	29.359	31.505	30.052	25.736	25.168
266	29.257	29.288	31.444	29.935	25.679	25.076
266.5	29.214	29.315	31.405	29.856	25.592	24.91
267	29.241	29.316	31.353	29.843	25.417	24.699
267.5	29.208	29.192	31.256	29.8	25.282	24.511
268	29.198	29.123	31.205	29.918	25.162	24.342
268.5	29.101	29.013	31.159	29.916	25.087	24.234
269	28.998	29.024	31.173	29.873	25.086	24.165
269.5	28.981	29.021	31.192	29.874	25.036	24.124
270	28.925	28.907	31.185	29.855	24.937	24.095
270.5	28.905	28.75	31.22	29.797	24.809	24.034
271	28.897	28.563	31.191	29.754	24.681	23.946
271.5	28.844	28.427	31.167	29.735	24.575	23.866
272	28.928	28.383	31.073	29.638	24.529	23.801
272.5	28.965	28.463	30.897	29.561	24.507	23.712
273	29.02	28.5	30.738	29.588	24.455	23.628
273.5	29.093	28.505	30.629	29.654	24.36	23.514
274	28.977	28.425	30.544	29.659	24.24	23.476
274.5	28.873	28.369	30.582	29.772	24.136	23.525
275	28.731	28.387	30.714	29.782	24.056	23.512
275.5	28.69	28.391	30.75	29.656	24.024	23.473
276	28.659	28.433	30.728	29.595	23.971	23.37
276.5	28.635	28.325	30.635	29.43	23.906	23.231
277	28.575	28.086	30.477	29.211	23.828	23.179
277.5	28.417	27.955	30.389	29.067	23.757	23.171
278	28.33	27.852	30.378	28.953	23.718	23.132
278.5	28.311	27.788	30.325	28.861	23.692	23.12
279	28.378	27.864	30.28	28.853	23.645	23.052
279.5	28.348	27.812	30.176	28.867	23.595	23.005
280	28.233	27.618	29.959	28.834	23.532	22.913
280.5	28.124	27.45	29.829	28.793	23.47	22.755
281	27.965	27.28	29.678	28.735	23.414	22.576
281.5	27.898	27.173	29.582	28.709	23.289	22.415
282	27.901	27.147	29.572	28.705	23.199	22.344
282.5	27.891	27.139	29.49	28.731	23.15	22.368
283	27.935	27.121	29.46	28.627	23.139	22.46
283.5	27.964	27.073	29.386	28.394	23.168	22.522
284	27.923	27.022	29.287	28.185	23.153	22.491
284.5	27.785	27.009	29.218	28.053	23.054	22.408
285	27.645	26.99	29.132	27.999	22.899	22.255
285.5	27.527	26.976	29.043	28.004	22.738	22.09
286	27.375	26.861	28.836	27.881	22.597	21.961
286.5	27.204	26.647	28.594	27.651	22.542	21.829
287	26.897	26.451	28.362	27.484	22.499	21.748
287.5	26.663	26.325	28.289	27.359	22.448	21.669
288	26.608	26.336	28.315	27.283	22.371	21.62
288.5	26.499	26.336	28.181	27.204	22.271	21.57
289	26.444	26.264	28.003	27.069	22.194	21.485
289.5	26.23	26.121	27.781	26.932	22.152	21.437
290	25.962	25.931	27.561	26.817	22.128	21.377
290.5	25.834	25.793	27.427	26.678	22.147	21.309
291	25.73	25.747	27.25	26.529	22.16	21.312
291.5	25.65	25.792	27.065	26.291	22.185	21.315
292	25.533	25.913	26.95	26.092	22.249	21.337
292.5	25.327	25.977	26.873	25.987	22.273	21.407
293	25.153	25.926	26.795	25.917	22.265	21.416
293.5	25.048	25.896	26.797	25.96	22.28	21.406
294	24.99	25.871	26.829	25.982	22.284	21.413
294.5	24.978	25.913	26.872	26.007	22.291	21.409
295	24.971	25.921	26.841	26.032	22.328	21.417
295.5	24.936	25.833	26.73	25.993	22.264	21.403
296	24.972	25.67	26.636	25.958	22.186	21.384
296.5	24.997	25.514	26.525	25.847	22.185	21.346
297	24.95	25.46	26.416	25.719	22.201	21.346
297.5	24.925	25.43	26.31	25.594	22.254	21.364
298	24.802	25.433	26.179	25.451	22.293	21.337
298.5	24.736	25.419	26.032	25.296	22.287	21.33
299	24.667	25.334	25.984	25.096	22.229	21.293
299.5	24.593	25.283	25.941	24.956	22.173	21.238
300	24.482	25.159	25.839	24.903	22.043	21.204
300.5	24.367	25.008	25.796	24.863	21.885	21.147
301	24.242	24.948	25.677	24.784	21.79	21.08
301.5	24.233	24.964	25.649	24.667	21.743	21.026
302	24.319	25.056	25.709	24.602	21.761	20.944
302.5	24.374	25.191	25.715	24.559	21.724	20.859
303	24.317	25.186	25.753	24.515	21.646	20.776
303.5	24.098	24.959	25.68	24.355	21.557	20.709
304	23.823	24.764	25.592	24.163	21.498	20.679
304.5	23.635	24.592	25.542	24.079	21.507	20.671
305	23.687	24.555	25.423	24.131	21.481	20.727
305.5	23.744	24.653	25.221	24.169	21.462	20.779
306	23.781	24.676	25.02	24.185	21.428	20.776
306.5	23.709	24.651	24.911	24.105	21.382	20.776
307	23.494	24.6	24.837	23.979	21.383	20.701
307.5	23.38	24.572	24.829	23.936	21.28	20.593
308	23.318	24.673	24.81	23.899	21.17	20.484
308.5	23.324	24.807	24.746	23.918	21.125	20.349
309	23.405	24.954	24.772	23.94	21.08	20.276
309.5	23.359	24.988	24.691	23.945	21.083	20.203
310	23.271	24.786	24.631	23.893	21.07	20.182
310.5	23.204	24.573	24.596	23.82	21.055	20.168
311	23.153	24.268	24.49	23.752	21.033	20.09
311.5	23.084	23.994	24.496	23.681	20.987	20.03
312	23.107	23.882	24.484	23.66	20.929	20.017
312.5	23.168	23.862	24.412	23.626	20.763	19.959
313	23.095	23.943	24.344	23.556	20.665	19.973
313.5	23.007	24.028	24.243	23.395	20.641	20.028
314	22.845	24.004	24.11	23.285	20.641	20.015
314.5	22.652	23.898	23.973	23.175	20.622	19.974
315	22.609	23.716	23.913	23.093	20.523	19.899
315.5	22.596	23.546	23.938	23.115	20.408	19.776
316	22.58	23.415	24.018	23.101	20.31	19.643
316.5	22.573	23.321	24.098	23.14	20.323	19.567
317	22.63	23.318	24.073	23.137	20.361	19.507
317.5	22.657	23.354	23.967	23.132	20.423	19.513
318	22.68	23.326	23.825	23.166	20.451	19.548
318.5	22.684	23.35	23.729	23.22	20.4	19.543
319	22.589	23.395	23.71	23.322	20.31	19.49
319.5	22.419	23.431	23.664	23.211	20.206	19.395
320	22.23	23.486	23.619	23.067	20.176	19.345
320.5	21.964	23.399	23.462	22.862	20.149	19.319
321	21.803	23.221	23.314	22.591	20.101	19.306
321.5	21.83	23.032	23.285	22.489	20.065	19.257
322	21.829	22.82	23.359	22.448	19.989	19.176
322.5	21.85	22.733	23.521	22.456	19.961	19.135
323	21.841	22.893	23.585	22.513	19.993	19.112
323.5	21.819	23.115	23.526	22.507	19.996	19.105
324	21.82	23.33	23.356	22.414	20.063	19.036
324.5	21.847	23.385	23.345	22.432	20.094	18.912
325	21.84	23.173	23.231	22.437	19.975	18.785
325.5	21.848	23.014	23.217	22.534	19.828	18.74
326	21.737	22.873	23.132	22.525	19.651	18.803
326.5	21.643	22.72	23.031	22.45	19.566	18.851
327	21.603	22.703	23.177	22.385	19.605	18.874
327.5	21.584	22.545	23.257	22.291	19.62	18.793
328	21.67	22.436	23.362	22.25	19.582	18.658
328.5	21.69	22.482	23.301	22.258	19.496	18.556
329	21.585	22.452	23.015	22.259	19.389	18.5
329.5	21.45	22.538	22.823	22.128	19.315	18.511
330	21.333	22.615	22.664	22.013	19.264	18.559
330.5	21.209	22.489	22.595	21.866	19.21	18.561
331	21.295	22.439	22.627	21.78	19.19	18.459
331.5	21.485	22.41	22.582	21.875	19.196	18.344
332	21.652	22.409	22.567	21.986	19.177	18.21
332.5	21.663	22.404	22.534	21.928	19.188	18.148
333	21.597	22.301	22.476	21.906	19.182	18.162
333.5	21.473	22.142	22.34	21.795	19.127	18.127
334	21.4	22.081	22.135	21.744	19.137	18.087
334.5	21.325	22.129	21.935	21.766	19.061	18.002
335	21.121	22.134	21.728	21.662	18.968	17.89
335.5	20.963	22.121	21.664	21.534	18.948	17.837
336	20.919	21.974	21.73	21.542	18.859	17.824
336.5	20.952	21.803	21.758	21.606	18.828	17.833
337	21.004	21.745	21.891	21.663	18.778	17.801
337.5	21.122	21.677	21.899	21.701	18.767	17.752
338	21.176	21.622	21.774	21.589	18.777	17.655
338.5	21.286	21.624	21.746	21.493	18.844	17.613
339	21.365	21.701	21.736	21.46	18.881	17.65
339.5	21.22	21.768	21.781	21.402	18.871	17.657
340	20.985	21.727	21.732	21.162	18.851	17.602
340.5	20.765	21.584	21.649	21.023	18.719	17.484
341	20.598	21.357	21.633	20.994	18.606	17.365
341.5	20.565	21.331	21.658	21.067	18.502	17.349
342	20.652	21.416	21.721	21.244	18.398	17.408
342.5	20.717	21.479	21.633	21.231	18.375	17.477
343	20.624	21.368	21.295	21.013	18.358	17.565
343.5	20.342	21.052	20.943	20.75	18.29	17.581
344	20	20.798	20.785	20.622	18.254	17.49
344.5	19.783	20.779	20.788	20.559	18.212	17.32
345	19.901	20.995	20.979	20.656	18.209	17.107
345.5	20.202	21.293	21.059	20.764	18.265	17.013
346	20.409	21.479	21.214	20.805	18.199	16.946
346.5	20.43	21.425	21.355	20.827	18.087	16.931
347	20.339	21.284	21.472	20.82	17.974	16.975
347.5	20.194	21.159	21.509	20.734	17.925	16.979
348	20.113	20.969	21.343	20.623	17.904	16.996
348.5	19.973	20.748	21.065	20.458	17.931	16.987
349	19.843	20.446	20.891	20.224	17.813	16.837
349.5	19.832	20.258	20.874	20.228	17.703	16.725
350	20.007	20.332	21.015	20.379	17.579	16.652
350.5	20.143	20.425	21.059	20.573	17.524	16.647
351	20.079	20.408	20.979	20.69	17.532	16.675
351.5	19.934	20.199	20.839	20.654	17.534	16.624
352	19.675	19.976	20.644	20.464	17.549	16.606
352.5	19.548	19.866	20.656	20.369	17.499	16.548
353	19.405	19.854	20.623	20.305	17.433	16.423
353.5	19.264	19.779	20.621	20.203	17.335	16.369
354	19.167	19.681	20.576	20.169	17.188	16.293
354.5	19.217	19.676	20.498	20.082	17.107	16.219
355	19.452	19.652	20.481	20.012	17.07	16.226
355.5	19.674	19.647	20.404	19.949	17.074	16.191
356	19.802	19.59	20.325	19.83	17.088	16.134
356.5	19.71	19.473	20.22	19.844	16.935	16.027
357	19.537	19.419	20.173	19.918	16.701	15.894
357.5	19.394	19.404	20.098	19.924	16.463	15.773
358	19.387	19.264	20.079	19.803	16.262	15.74
358.5	19.427	19.09	20.058	19.571	16.185	15.698
359	19.44	18.91	20.109	19.35	16.216	15.626
359.5	19.366	18.806	20.11	19.345	16.206	15.478
360	19.346	18.911	20.055	19.468	16.238	15.349
360.5	19.256	19.056	20.028	19.623	16.307	15.287
361	19.094	19.076	20.003	19.75	16.417	15.243
361.5	19.06	19.068	20.067	19.866	16.588	15.253
362	19.083	18.943	20.119	19.902	16.686	15.303
362.5	19.242	18.88	20.052	19.747	16.692	15.373
363	19.414	18.776	19.825	19.533	16.575	15.364
363.5	19.364	18.59	19.595	19.37	16.441	15.315
364	19.098	18.405	19.427	19.198	16.277	15.245
364.5	18.919	18.233	19.38	19.161	16.221	15.231
365	18.829	18.227	19.404	19.191	16.203	15.273
365.5	18.706	18.243	19.447	19.208	16.157	15.234
366	18.731	18.221	19.483	19.367	16.1	15.089
366.5	18.645	18.238	19.57	19.493	15.947	14.905
367	18.574	18.242	19.715	19.503	15.784	14.766
367.5	18.637	18.256	19.823	19.491	15.72	14.759
368	18.668	18.267	19.823	19.332	15.676	14.889
368.5	18.623	18.243	19.758	19.14	15.694	14.969
369	18.59	18.279	19.58	19.027	15.756	14.894
369.5	18.588	18.324	19.451	18.936	15.721	14.723
370	18.547	18.303	19.269	18.89	15.706	14.602
370.5	18.464	18.233	19.099	18.857	15.615	14.582
371	18.499	18.125	19.097	18.893	15.585	14.742
371.5	18.567	18.308	19.24	19.084	15.582	14.71
372	18.694	18.609	19.46	19.304	15.554	14.511
372.5	18.741	18.724	19.443	19.32	15.498	14.378
373	18.546	18.602	19.312	19.039	15.383	14.298
373.5	18.488	18.248	19.167	18.843	15.327	14.419
374	18.53	18.02	19.007	18.701	15.374	14.537
374.5	18.617	17.962	18.997	18.719	15.436	14.468
375	18.568	18.174	19.1	18.923	15.444	14.336
375.5	18.354	18.315	19.181	18.884	15.36	14.268
376	18.09	18.397	19.312	18.881	15.297	14.333
376.5	17.906	18.552	19.341	18.873	15.302	14.43
377	17.869	18.706	19.302	18.861	15.443	14.473
377.5	17.859	18.747	19.185	18.829	15.617	14.493
378	17.855	18.591	19.109	18.787	15.735	14.457
378.5	17.783	18.339	19.126	18.803	15.769	14.475
379	17.675	18.062	19.046	18.808	15.705	14.563
379.5	17.555	18.216	18.986	18.999	15.62	14.667
380	17.481	18.467	18.796	19.004	15.618	14.785
380.5	17.326	18.719	18.45	18.724	15.67	14.84
381	17.121	18.785	18.184	18.353	15.643	14.676
381.5	17.093	18.729	18.054	17.976	15.661	14.522
382	17.222	18.722	18.06	17.768	15.601	14.389
382.5	17.456	18.764	18.033	17.833	15.56	14.427
383	17.608	18.839	17.927	17.834	15.532	14.433
383.5	17.287	18.86	17.787	17.738	15.438	14.276
384	16.97	18.912	17.779	17.659	15.282	14.034
384.5	16.738	18.876	17.94	17.542	15.248	13.823
385	16.598	18.868	18.011	17.332	15.367	13.87
385.5	16.629	18.839	18.044	17.089	15.467	14.021
386	16.454	18.717	17.885	16.847	15.562	14.119
386.5	16.342	18.791	17.813	16.671	15.533	14.185
387	16.368	18.812	17.916	16.683	15.481	14.196
387.5	16.392	18.745	18.187	16.899	15.448	14.172
388	16.541	18.671	18.495	17.151	15.311	14.095
388.5	16.581	18.658	18.632	17.391	15.206	14.033
389	16.597	18.834	18.491	17.513	15.155	13.973
389.5	16.685	18.95	18.124	17.304	15.218	13.993
390	16.741	19.029	17.865	17.098	15.263	14.181
390.5	16.7	18.793	17.63	16.83	15.261	14.326
391	16.573	18.585	17.557	16.757	15.13	14.36
391.5	16.393	18.701	17.61	16.864	14.998	14.316
392	16.226	18.907	17.717	16.984	15.021	14.11
392.5	16.172	19.25	17.822	17.278	14.902	13.836
393	16.074	19.471	17.877	17.328	14.762	13.652
393.5	15.904	19.516	17.932	17.169	14.628	13.534
394	15.875	19.493	17.89	16.911	14.492	13.364
394.5	15.897	19.229	17.798	16.503	14.677	13.392
395	15.719	18.718	17.526	16.172	14.992	13.47
395.5	15.571	18.36	17.205	15.885	15.117	13.586
396	15.449	18.117	17.007	15.657	15.018	13.762
396.5	15.569	18.409	16.909	15.702	14.828	13.774
397	15.866	18.829	16.953	15.811	14.665	13.722
397.5	16.009	19.181	17.066	16.072	14.752	13.614
398	15.867	19.35	17.074	16.232	14.864	13.579
398.5	15.701	19.121	16.901	16.113	14.848	13.655
399	15.717	18.828	16.789	16.172	14.777	13.692
399.5	15.656	18.686	16.572	16.325	14.609	13.779
400	15.673	18.634	16.588	16.472	14.492	13.876
400.5	15.621	18.771	16.645	16.546	14.551	13.862
401	15.553	19.077	16.689	16.578	14.527	13.731
401.5	15.704	19.367	16.682	16.512	14.468	13.461
402	15.764	19.626	16.845	16.595	14.4	13.209
402.5	15.703	19.721	16.994	16.496	14.259	13.012
403	15.554	19.541	17.197	16.206	14.189	12.994
403.5	15.219	19.116	17.222	15.835	14.214	12.96
404	15.211	18.801	16.987	15.834	14.319	12.945
404.5	15.304	18.547	16.687	16	14.442	13.005
405	15.45	18.517	16.524	16.049	14.481	12.925
405.5	15.35	18.593	16.451	16.064	14.285	12.922
406	14.963	18.493	16.368	15.78	14.141	13.018
406.5	14.726	18.441	16.401	15.669	14.197	13.175
407	14.663	18.312	16.512	15.668	14.306	13.319
407.5	14.938	18.521	16.748	15.694	14.443	13.423
408	15.303	18.892	17.051	15.865	14.43	13.433
408.5	15.538	18.92	17.124	15.753	14.411	13.372
409	15.878	19.019	17.195	15.754	14.476	13.442
409.5	16.059	18.978	17.079	15.745	14.466	13.482
410	16.002	18.971	16.83	15.669	14.488	13.448
410.5	15.865	19.064	16.581	15.686	14.504	13.483
411	15.725	19.04	16.459	15.671	14.553	13.422
411.5	15.681	19.055	16.465	15.817	14.713	13.384
412	15.709	19.099	16.525	15.949	14.812	13.407
412.5	15.788	19.289	16.551	16.106	14.813	13.4
413	15.921	19.576	16.554	16.225	14.748	13.366
413.5	15.958	19.746	16.67	16.223	14.604	13.332
414	15.991	19.984	16.884	16.358	14.501	13.304
414.5	15.81	19.864	16.901	16.224	14.498	13.375
415	15.665	19.558	16.909	16.07	14.466	13.439
415.5	15.694	19.298	16.827	16.002	14.617	13.609
416	15.759	19.112	16.816	16.077	14.709	13.792
416.5	15.867	19.076	16.894	16.069	14.792	13.861
417	15.973	19.178	16.905	15.978	14.675	13.801
417.5	16.022	19.479	17.051	16.018	14.57	13.692
418	16.018	19.61	17.187	16.115	14.551	13.477
418.5	15.747	19.694	17.346	16.224	14.665	13.477
419	15.548	19.747	17.378	16.235	14.834	13.517
419.5	15.473	19.605	17.205	16	14.811	13.591
420	15.593	19.644	17.189	15.976	14.82	13.724
420.5	15.771	19.636	17.229	16.131	14.657	13.718
421	15.901	19.542	17.449	16.25	14.464	13.727
421.5	15.94	19.499	17.602	16.415	14.328	13.756
422	16.071	19.624	17.7	16.579	14.416	13.867
422.5	16.229	19.752	17.702	16.661	14.514	13.983
423	16.298	19.868	17.682	16.785	14.544	13.917
423.5	16.272	19.831	17.528	16.723	14.561	13.682
424	16.183	19.763	17.401	16.668	14.496	13.445
424.5	16.058	19.595	17.241	16.591	14.576	13.308
425	16.042	19.327	17.132	16.486	14.586	13.378
425.5	16.066	19.248	17.175	16.45	14.449	13.491
426	16.27	19.295	17.33	16.619	14.365	13.638
426.5	16.467	19.6	17.582	16.887	14.387	13.723
427	16.649	19.875	17.681	17.08	14.456	13.701
427.5	16.626	19.851	17.546	17.006	14.6	13.658
428	16.457	19.645	17.274	16.774	14.63	13.649
428.5	16.337	19.556	17.243	16.67	14.559	13.693
429	16.15	19.476	17.277	16.543	14.535	13.676
429.5	16.112	19.632	17.467	16.518	14.503	13.657
430	16.179	19.896	17.753	16.572	14.489	13.65
430.5	16.312	20.072	17.802	16.643	14.409	13.644
431	16.431	20.125	17.813	16.793	14.359	13.741
431.5	16.561	20.079	17.849	16.97	14.357	13.699
432	16.642	19.972	17.833	16.994	14.489	13.643
432.5	16.637	19.833	17.855	17.019	14.643	13.648
433	16.562	19.67	17.805	16.978	14.616	13.568
433.5	16.3	19.421	17.608	16.858	14.594	13.663
434	16.135	19.258	17.482	16.856	14.559	13.658
434.5	16.291	19.319	17.474	16.976	14.534	13.71
435	16.465	19.333	17.422	17.029	14.572	13.743
435.5	16.678	19.54	17.468	17.158	14.571	13.755
436	16.704	19.76	17.479	17.193	14.584	13.82
436.5	16.63	19.86	17.524	17.18	14.612	13.802
437	16.651	19.908	17.661	17.243	14.536	13.747
437.5	16.658	19.766	17.712	17.2	14.41	13.618
438	16.762	19.675	17.816	17.168	14.305	13.569
438.5	16.935	19.635	17.792	17.172	14.231	13.58
439	16.882	19.66	17.725	17.149	14.262	13.633
439.5	16.716	19.696	17.705	17.116	14.385	13.658
440	16.542	19.648	17.744	17.082	14.447	13.614
440.5	16.533	19.639	17.808	17.138	14.464	13.565
441	16.729	19.498	17.762	17.24	14.372	13.526
441.5	16.811	19.302	17.728	17.246	14.319	13.513
442	16.776	19.254	17.673	17.182	14.338	13.573
442.5	16.654	19.235	17.763	17.012	14.341	13.639
443	16.707	19.391	17.913	17.013	14.37	13.642
443.5	16.777	19.562	18.028	17.19	14.368	13.639
444	16.764	19.672	18.005	17.289	14.478	13.669
444.5	16.688	19.739	17.953	17.304	14.554	13.747
445	16.538	19.787	17.95	17.252	14.579	13.848
445.5	16.597	19.839	17.938	17.212	14.542	13.857
446	16.609	19.713	17.876	17.209	14.412	13.767
446.5	16.562	19.607	17.805	17.163	14.336	13.623
447	16.577	19.589	17.768	17.126	14.282	13.575
447.5	16.46	19.58	17.758	17.033	14.226	13.5
448	16.43	19.662	17.786	16.988	14.247	13.51
448.5	16.426	19.701	17.69	17.013	14.224	13.549
449	16.397	19.734	17.62	17.075	14.247	13.642
449.5	16.518	19.765	17.663	17.146	14.307	13.697
450	16.617	19.75	17.673	17.148	14.296	13.709
450.5	16.682	19.782	17.714	17.082	14.283	13.688
451	16.698	19.868	17.629	16.989	14.278	13.724
451.5	16.731	19.933	17.585	16.94	14.382	13.85
452	16.803	19.952	17.667	16.921	14.536	13.906
452.5	16.855	19.897	17.764	16.94	14.61	13.801
453	16.846	19.812	17.859	16.985	14.616	13.639
453.5	16.728	19.755	17.936	17.005	14.559	13.538
454	16.623	19.658	17.979	17.015	14.484	13.568
454.5	16.613	19.647	18.106	17.043	14.48	13.709
455	16.814	19.724	18.266	17.079	14.436	13.825
455.5	17.002	19.821	18.327	17.07	14.441	13.918
456	17.109	19.85	18.344	16.971	14.411	13.964
456.5	17.086	19.811	18.198	16.821	14.407	13.901
457	16.988	19.729	18.032	16.77	14.366	13.768
457.5	16.872	19.724	17.898	16.78	14.352	13.661
458	16.778	19.745	17.912	16.818	14.349	13.658
458.5	16.691	19.772	18.043	16.928	14.312	13.715
459	16.691	19.86	18.218	16.988	14.371	13.767
459.5	16.685	19.895	18.331	17.13	14.482	13.8
460	16.71	19.94	18.377	17.185	14.58	13.817
460.5	16.686	19.844	18.299	17.047	14.663	13.824
461	16.631	19.758	18.253	17	14.616	13.735
461.5	16.611	19.658	18.169	17.024	14.587	13.67
462	16.553	19.595	18.032	17.034	14.473	13.619
462.5	16.5	19.605	17.985	16.962	14.369	13.625
463	16.453	19.604	17.933	16.83	14.262	13.649
463.5	16.439	19.616	18.007	16.865	14.288	13.685
464	16.436	19.564	18.082	16.994	14.402	13.731
464.5	16.507	19.444	18.048	17.086	14.477	13.749
465	16.576	19.37	18.037	17.026	14.519	13.741
465.5	16.606	19.395	18.029	16.878	14.466	13.725
466	16.587	19.476	17.998	16.73	14.454	13.731
466.5	16.512	19.61	18.041	16.601	14.456	13.763
467	16.569	19.748	18.087	16.587	14.415	13.771
467.5	16.719	19.791	18.175	16.691	14.391	13.739
468	16.807	19.712	18.234	16.766	14.331	13.69
468.5	16.79	19.643	18.156	16.859	14.286	13.541
469	16.754	19.655	18.036	16.834	14.385	13.486
469.5	16.788	19.816	18.02	16.862	14.439	13.421
470	16.824	19.91	17.985	16.884	14.487	13.482
470.5	16.762	19.976	17.946	16.905	14.536	13.587
471	16.551	20.052	17.908	16.962	14.473	13.663
471.5	16.428	20.105	17.96	17.003	14.467	13.685
472	16.408	20.089	18.055	17.049	14.462	13.706
472.5	16.566	19.962	18.199	17.044	14.46	13.77
473	16.788	19.858	18.235	17.065	14.423	13.816
473.5	16.926	19.812	18.285	17.158	14.364	13.828
474	16.99	19.766	18.322	17.186	14.294	13.727
474.5	16.938	19.664	18.248	17.143	14.277	13.668
475	16.877	19.573	18.212	16.992	14.321	13.623
475.5	16.859	19.597	18.078	16.821	14.354	13.664
476	16.781	19.654	18.035	16.782	14.421	13.682
476.5	16.71	19.666	17.998	16.775	14.479	13.692
477	16.657	19.646	18.052	16.795	14.499	13.655
477.5	16.637	19.566	18.16	16.875	14.483	13.55
478	16.685	19.557	18.263	16.91	14.466	13.466
478.5	16.694	19.55	18.34	16.953	14.405	13.434
479	16.699	19.594	18.369	16.994	14.398	13.469
479.5	16.741	19.633	18.385	17.058	14.434	13.543
480	16.692	19.564	18.357	17.071	14.446	13.636
480.5	16.704	19.572	18.351	17.077	14.492	13.71
481	16.718	19.663	18.35	17.079	14.492	13.75
481.5	16.698	19.786	18.43	17.122	14.479	13.742
482	16.688	19.822	18.472	17.165	14.463	13.69
482.5	16.678	19.846	18.541	17.169	14.464	13.646
483	16.743	19.808	18.565	17.115	14.479	13.664
483.5	16.888	19.916	18.551	17.175	14.537	13.701
484	16.963	19.982	18.51	17.213	14.578	13.791
484.5	16.973	20.002	18.483	17.261	14.553	13.845
485	16.888	20.008	18.517	17.301	14.474	13.801
485.5	16.778	19.906	18.486	17.27	14.423	13.757
486	16.717	19.733	18.501	17.23	14.415	13.741
486.5	16.712	19.62	18.5	17.149	14.489	13.801
487	16.837	19.689	18.556	17.124	14.562	13.899
487.5	16.956	19.765	18.677	17.131	14.606	13.959
488	17.058	19.867	18.728	17.179	14.605	13.964
488.5	17.057	19.85	18.749	17.243	14.547	13.968
489	17.027	19.859	18.767	17.366	14.475	13.928
489.5	16.952	19.939	18.822	17.456	14.387	13.863
490	16.844	19.98	18.866	17.429	14.365	13.811
490.5	16.833	20.041	18.918	17.342	14.424	13.776
491	16.849	20.042	18.92	17.245	14.556	13.809
491.5	16.977	20.036	18.924	17.273	14.664	13.898
492	17.108	20.044	19	17.343	14.705	13.926
492.5	17.206	20.048	19.065	17.391	14.668	13.974
493	17.24	20.087	19.181	17.431	14.646	14.001
493.5	17.179	20.103	19.249	17.442	14.708	14.049
494	17.116	20.076	19.282	17.432	14.786	14.113
494.5	17.151	20.106	19.314	17.383	14.864	14.147
495	17.224	20.109	19.345	17.37	14.88	14.201
495.5	17.256	20.147	19.429	17.377	14.923	14.265
496	17.206	20.161	19.549	17.414	14.968	14.316
496.5	17.2	20.24	19.667	17.434	15.039	14.371
497	17.32	20.294	19.769	17.439	15.106	14.399
497.5	17.521	20.345	19.884	17.494	15.169	14.428
498	17.597	20.325	19.935	17.58	15.224	14.441
498.5	17.632	20.289	19.993	17.658	15.271	14.453
499	17.641	20.326	20.028	17.698	15.265	14.507
499.5	17.756	20.403	20.101	17.709	15.248	14.563
500	17.855	20.534	20.222	17.762	15.238	14.647
500.5	17.884	20.607	20.351	17.775	15.301	14.733
501	17.849	20.645	20.468	17.838	15.453	14.82
501.5	17.856	20.693	20.599	17.896	15.59	14.909
502	17.922	20.831	20.775	18.018	15.653	14.963
502.5	17.944	21.015	20.944	18.079	15.676	15.016
503	17.891	21.114	21.101	18.07	15.778	15.127
503.5	17.775	21.15	21.252	18.058	15.941	15.25
504	17.754	21.224	21.44	18.088	16.15	15.4
504.5	17.822	21.303	21.607	18.159	16.276	15.483
505	17.999	21.415	21.792	18.206	16.391	15.53
505.5	18.147	21.481	21.932	18.222	16.511	15.606
506	18.345	21.562	22.138	18.29	16.664	15.782
506.5	18.503	21.739	22.303	18.385	16.835	16.01
507	18.618	21.802	22.449	18.434	17.041	16.193
507.5	18.706	21.878	22.645	18.456	17.189	16.268
508	18.81	21.936	22.864	18.524	17.325	16.328
508.5	18.977	22.069	23.141	18.636	17.466	16.459
509	19.202	22.328	23.359	18.817	17.63	16.676
509.5	19.359	22.592	23.615	18.994	17.824	16.875
510	19.463	22.808	23.832	19.067	18.007	17.094
510.5	19.513	22.994	24.079	19.094	18.235	17.298
511	19.561	23.097	24.288	19.052	18.494	17.501
511.5	19.621	23.242	24.512	19.104	18.736	17.675
512	19.773	23.51	24.821	19.279	18.979	17.83
512.5	20.018	23.837	25.175	19.499	19.206	17.953
513	20.288	24.143	25.494	19.71	19.434	18.127
513.5	20.515	24.355	25.736	19.843	19.664	18.3
514	20.663	24.506	25.918	19.987	19.844	18.506
514.5	20.782	24.725	26.14	20.146	20.123	18.732
515	20.922	24.97	26.452	20.362	20.44	18.976
515.5	21.106	25.267	26.799	20.581	20.729	19.246
516	21.348	25.586	27.138	20.79	20.981	19.552
516.5	21.587	25.857	27.433	20.956	21.162	19.855
517	21.799	26.115	27.744	21.152	21.34	20.088
517.5	21.91	26.29	28.076	21.337	21.594	20.36
518	22.101	26.549	28.472	21.569	21.938	20.613
518.5	22.266	26.838	28.776	21.748	22.285	20.899
519	22.457	27.096	29.002	21.814	22.633	21.103
519.5	22.636	27.33	29.153	21.841	22.952	21.3
520	22.863	27.637	29.352	21.898	23.263	21.529
520.5	23.186	28.028	29.643	22.134	23.612	21.768
521	23.501	28.446	30.021	22.399	23.875	22.035
521.5	23.788	28.796	30.425	22.654	24.093	22.242
522	23.964	29.128	30.722	22.846	24.332	22.518
522.5	24.116	29.384	31.026	23.029	24.609	22.818
523	24.278	29.597	31.255	23.219	24.876	23.065
523.5	24.529	29.756	31.524	23.394	25.13	23.316
524	24.821	30.021	31.809	23.569	25.373	23.509
524.5	25.062	30.414	32.108	23.798	25.612	23.735
525	25.24	30.829	32.381	23.972	25.902	23.984
525.5	25.408	31.191	32.595	24.172	26.097	24.2
526	25.617	31.463	32.774	24.29	26.262	24.431
526.5	25.863	31.702	32.976	24.481	26.458	24.632
527	26.101	31.978	33.201	24.696	26.725	24.86
527.5	26.274	32.199	33.372	24.889	26.995	25.036
528	26.4	32.441	33.487	25.101	27.258	25.169
528.5	26.538	32.641	33.637	25.249	27.519	25.363
529	26.703	32.857	33.884	25.415	27.805	25.534
529.5	26.872	33.033	34.085	25.529	28.079	25.718
530	26.993	33.182	34.278	25.584	28.274	25.786
530.5	27.075	33.303	34.389	25.673	28.457	25.826
531	27.238	33.496	34.535	25.812	28.592	25.881
531.5	27.43	33.769	34.756	26.059	28.728	26.001
532	27.599	33.975	34.839	26.262	28.804	26.156
532.5	27.723	34.17	34.867	26.358	28.917	26.313
533	27.835	34.238	34.937	26.465	29.091	26.448
533.5	27.891	34.342	35.03	26.556	29.275	26.541
534	27.978	34.523	35.282	26.683	29.463	26.701
534.5	28.086	34.812	35.516	26.812	29.643	26.844
535	28.207	35.054	35.694	26.887	29.797	26.984
535.5	28.375	35.225	35.785	26.934	29.897	27.106
536	28.378	35.218	35.713	26.919	29.951	27.177
536.5	28.403	35.23	35.662	26.869	29.969	27.231
537	28.468	35.294	35.835	26.984	30.019	27.249
537.5	28.614	35.323	36.133	27.149	30.129	27.309
538	28.678	35.408	36.282	27.227	30.181	27.408
538.5	28.667	35.457	36.253	27.234	30.304	27.529
539	28.685	35.568	36.23	27.22	30.341	27.606
539.5	28.674	35.677	36.212	27.282	30.396	27.604
540	28.774	35.81	36.326	27.385	30.454	27.606
540.5	28.837	35.919	36.289	27.431	30.516	27.614
541	28.918	35.899	36.234	27.429	30.578	27.661
541.5	29.01	35.81	36.243	27.436	30.696	27.731
542	29.017	35.79	36.296	27.437	30.814	27.755
542.5	29.087	35.872	36.468	27.541	30.916	27.829
543	29.157	36.011	36.535	27.546	30.963	27.986
543.5	29.202	36.148	36.628	27.556	30.934	28.082
544	29.186	36.212	36.72	27.548	30.923	28.091
544.5	29.134	36.322	36.881	27.601	30.954	28.028
545	29.154	36.334	36.955	27.675	30.968	28.005
545.5	29.184	36.322	36.954	27.751	30.988	28.068
546	29.222	36.298	36.868	27.802	31.061	28.162
546.5	29.288	36.218	36.818	27.928	31.117	28.287
547	29.348	36.194	36.814	28.085	31.176	28.405
547.5	29.38	36.254	36.852	28.19	31.161	28.442
548	29.351	36.386	36.922	28.243	31.144	28.337
548.5	29.312	36.489	36.979	28.173	31.186	28.306
549	29.328	36.506	37.092	28.12	31.278	28.342
549.5	29.331	36.464	37.161	28.049	31.37	28.465
550	29.302	36.495	37.217	28.054	31.441	28.505
550.5	29.297	36.573	37.197	28.004	31.357	28.459
551	29.319	36.633	37.149	27.963	31.243	28.465
551.5	29.379	36.664	37.141	27.931	31.162	28.489
552	29.464	36.744	37.104	27.923	31.148	28.535
552.5	29.513	36.78	37.071	27.979	31.199	28.472
553	29.565	36.766	37.008	28.025	31.284	28.44
553.5	29.525	36.726	37.001	28.014	31.36	28.422
554	29.461	36.69	37.028	27.971	31.471	28.467
554.5	29.452	36.731	36.955	27.927	31.479	28.481
555	29.457	36.739	36.896	27.961	31.435	28.456
555.5	29.425	36.742	36.831	27.966	31.364	28.445
556	29.342	36.72	36.902	27.912	31.259	28.427
556.5	29.284	36.722	36.988	27.829	31.185	28.406
557	29.196	36.575	37.002	27.789	31.159	28.415
557.5	29.111	36.465	36.946	27.758	31.173	28.428
558	29.013	36.3	36.884	27.702	31.204	28.412
558.5	29.006	36.195	36.779	27.613	31.151	28.306
559	29.072	36.181	36.698	27.583	31.071	28.157
559.5	29.132	36.163	36.656	27.61	30.98	27.998
560	29.084	36.04	36.647	27.553	30.977	27.894
560.5	28.94	35.796	36.6	27.421	30.908	27.828
561	28.751	35.55	36.439	27.262	30.821	27.815
561.5	28.64	35.446	36.265	27.134	30.746	27.785
562	28.64	35.396	36.155	27.097	30.63	27.69
562.5	28.647	35.32	36.113	27.033	30.565	27.633
563	28.555	35.197	36.042	26.905	30.452	27.548
563.5	28.463	35.139	35.93	26.807	30.355	27.457
564	28.324	35.016	35.784	26.708	30.208	27.272
564.5	28.182	34.877	35.655	26.652	30.003	27.09
565	28.041	34.696	35.615	26.628	29.789	26.949
565.5	27.896	34.512	35.541	26.555	29.71	26.863
566	27.766	34.365	35.48	26.44	29.628	26.78
566.5	27.591	34.171	35.341	26.233	29.581	26.729
567	27.426	34.011	35.224	26.001	29.448	26.622
567.5	27.369	33.876	35.093	25.841	29.311	26.509
568	27.259	33.696	34.909	25.676	29.183	26.321
568.5	27.116	33.59	34.721	25.602	28.945	26.132
569	26.956	33.509	34.561	25.518	28.705	25.985
569.5	26.795	33.364	34.446	25.398	28.423	25.886
570	26.712	33.213	34.261	25.232	28.274	25.739
570.5	26.584	33.005	34.051	25.055	28.202	25.538
571	26.434	32.823	33.826	24.874	28.182	25.37
571.5	26.228	32.617	33.668	24.752	28.149	25.301
572	26.058	32.416	33.602	24.678	28.038	25.283
572.5	25.97	32.278	33.525	24.673	27.913	25.227
573	25.917	32.237	33.432	24.701	27.708	25.106
573.5	25.819	32.163	33.27	24.638	27.548	25.004
574	25.662	32.016	33.09	24.495	27.396	24.865
574.5	25.447	31.847	32.944	24.342	27.285	24.761
575	25.305	31.62	32.808	24.188	27.067	24.572
575.5	25.247	31.386	32.674	24.028	26.886	24.467
576	25.266	31.172	32.601	23.957	26.683	24.396
576.5	25.26	31.022	32.532	23.844	26.528	24.34
577	25.182	30.879	32.507	23.841	26.37	24.237
577.5	25.02	30.66	32.342	23.804	26.186	24.03
578	24.869	30.399	32.178	23.8	26.112	23.874
578.5	24.771	30.336	32.058	23.764	26.081	23.759
579	24.704	30.322	32.055	23.63	26.023	23.631
579.5	24.601	30.267	32.052	23.409	25.903	23.506
580	24.456	30.147	31.952	23.192	25.795	23.327
580.5	24.365	30.026	31.822	23.029	25.738	23.263
581	24.374	29.978	31.722	22.993	25.71	23.201
581.5	24.362	29.838	31.624	22.988	25.605	23.131
582	24.33	29.714	31.483	22.958	25.407	23.004
582.5	24.223	29.6	31.351	22.917	25.253	22.906
583	24.039	29.504	31.292	22.848	25.172	22.916
583.5	23.866	29.391	31.284	22.74	25.212	22.963
584	23.7	29.243	31.175	22.62	25.195	22.939
584.5	23.69	29.155	31.083	22.568	25.127	22.864
585	23.66	29.053	30.997	22.556	25.029	22.8
585.5	23.614	28.954	31.049	22.605	24.941	22.688
586	23.531	28.776	31.026	22.567	24.844	22.514
586.5	23.478	28.675	30.959	22.459	24.701	22.289
587	23.441	28.604	30.831	22.354	24.584	22.173
587.5	23.353	28.516	30.697	22.195	24.501	22.144
588	23.283	28.429	30.598	22.179	24.451	22.202
588.5	23.232	28.338	30.476	22.169	24.366	22.191
589	23.19	28.347	30.365	22.167	24.29	22.158
589.5	23.119	28.374	30.267	22.135	24.258	22.048
590	23.06	28.301	30.221	22.064	24.186	21.937
590.5	23.003	28.167	30.243	21.939	24.136	21.9
591	22.998	28.039	30.296	21.867	24.061	21.904
591.5	23.007	27.988	30.308	21.876	23.988	21.908
592	23.074	28.01	30.297	21.941	23.92	21.873
592.5	23.083	27.973	30.257	21.939	23.876	21.903
593	23.048	27.86	30.128	21.775	23.903	21.933
593.5	22.982	27.768	30.067	21.685	23.911	21.892
594	22.914	27.676	29.999	21.629	23.85	21.766
594.5	22.886	27.654	30.029	21.711	23.764	21.66
595	22.81	27.614	30.026	21.718	23.731	21.649
595.5	22.738	27.645	29.99	21.701	23.74	21.612
596	22.697	27.666	29.987	21.61	23.714	21.551
596.5	22.655	27.616	29.942	21.564	23.62	21.477
597	22.663	27.571	29.929	21.541	23.479	21.523
597.5	22.602	27.55	29.917	21.509	23.435	21.571
598	22.546	27.527	29.921	21.443	23.499	21.572
598.5	22.513	27.486	29.899	21.379	23.626	21.539
599	22.545	27.447	29.917	21.386	23.675	21.469
599.5	22.566	27.479	29.91	21.404	23.664	21.453
600	22.554	27.509	29.903	21.441	23.601	21.414
600.5	22.472	27.483	29.784	21.446	23.533	21.344
601	22.366	27.396	29.662	21.408	23.397	21.282
601.5	22.286	27.341	29.609	21.33	23.248	21.198
602	22.23	27.241	29.578	21.249	23.157	21.183
602.5	22.219	27.122	29.519	21.264	23.138	21.189
603	22.145	26.98	29.39	21.306	23.148	21.153
603.5	22.128	26.954	29.287	21.306	23.091	21.056
604	22.085	26.901	29.268	21.171	23.013	20.983
604.5	22.058	26.817	29.285	21.039	22.912	20.956
605	21.97	26.685	29.192	20.936	22.87	21.01
605.5	21.894	26.718	29.141	20.954	22.822	20.988
606	21.863	26.808	29.158	20.955	22.805	20.911
606.5	21.879	26.738	29.22	20.934	22.782	20.825
607	21.874	26.568	29.142	20.877	22.705	20.67
607.5	21.831	26.337	28.958	20.829	22.578	20.549
608	21.726	26.246	28.761	20.791	22.413	20.426
608.5	21.655	26.199	28.697	20.768	22.297	20.408
609	21.576	26.159	28.62	20.691	22.291	20.433
609.5	21.514	26.073	28.527	20.619	22.287	20.417
610	21.43	26.011	28.367	20.562	22.285	20.356
610.5	21.387	25.974	28.207	20.493	22.261	20.238
611	21.392	25.892	28.125	20.443	22.245	20.134
611.5	21.362	25.779	28.052	20.32	22.175	20.08
612	21.272	25.63	28.047	20.203	22.025	20.012
612.5	21.132	25.523	27.94	20.096	21.913	19.967
613	21.043	25.428	27.9	20.052	21.788	19.88
613.5	20.966	25.342	27.791	20.058	21.703	19.832
614	20.897	25.324	27.726	20.093	21.525	19.765
614.5	20.798	25.242	27.606	20.108	21.409	19.639
615	20.758	25.114	27.521	20.036	21.345	19.514
615.5	20.752	24.991	27.411	19.951	21.323	19.417
616	20.7	24.89	27.323	19.87	21.306	19.37
616.5	20.638	24.861	27.264	19.873	21.262	19.321
617	20.569	24.844	27.252	19.94	21.216	19.317
617.5	20.521	24.834	27.209	19.942	21.186	19.346
618	20.447	24.749	27.098	19.884	21.113	19.405
618.5	20.381	24.654	26.925	19.777	21.013	19.328
619	20.357	24.537	26.804	19.683	20.864	19.161
619.5	20.327	24.42	26.725	19.647	20.747	18.992
620	20.269	24.326	26.675	19.556	20.717	18.946
620.5	20.197	24.242	26.679	19.506	20.682	18.943
621	20.143	24.253	26.649	19.445	20.63	18.957
621.5	20.088	24.199	26.608	19.437	20.553	18.916
622	20.075	24.136	26.49	19.361	20.527	18.87
622.5	20.12	24.078	26.416	19.298	20.551	18.828
623	20.179	24.087	26.451	19.262	20.532	18.766
623.5	20.208	24.054	26.474	19.295	20.468	18.666
624	20.181	23.976	26.396	19.353	20.38	18.601
624.5	20.118	23.918	26.245	19.33	20.327	18.593
625	20.096	23.963	26.231	19.28	20.286	18.608
625.5	20.076	24.069	26.326	19.218	20.236	18.638
626	20.078	24.105	26.448	19.256	20.178	18.631
626.5	20.012	24.041	26.38	19.271	20.132	18.636
627	20.018	23.995	26.248	19.329	20.193	18.648
627.5	20.017	23.924	26.091	19.319	20.286	18.604
628	20.017	23.887	26.036	19.333	20.347	18.558
628.5	19.939	23.809	26.074	19.291	20.287	18.502
629	19.852	23.806	26.101	19.248	20.252	18.493
629.5	19.901	23.882	26.141	19.196	20.258	18.519
630	19.961	23.936	26.124	19.138	20.268	18.533
630.5	20.029	23.96	26.195	19.124	20.264	18.506
631	20.007	23.892	26.264	19.108	20.274	18.495
631.5	19.988	23.835	26.264	19.144	20.263	18.493
632	19.975	23.83	26.175	19.158	20.222	18.523
632.5	19.939	23.834	26.072	19.203	20.132	18.523
633	19.915	23.806	26.034	19.195	20.073	18.476
633.5	19.886	23.688	26.028	19.128	20.018	18.426
634	19.844	23.586	25.965	19.04	19.963	18.444
634.5	19.731	23.539	25.836	18.958	19.884	18.405
635	19.589	23.524	25.648	18.96	19.816	18.353
635.5	19.512	23.531	25.516	18.966	19.746	18.24
636	19.508	23.518	25.484	19.089	19.708	18.178
636.5	19.533	23.44	25.433	19.076	19.629	18.134
637	19.41	23.249	25.305	19.001	19.553	18.054
637.5	19.261	23.083	25.132	18.784	19.43	17.998
638	19.129	23.024	25.072	18.628	19.306	17.918
638.5	19.098	23.016	25.065	18.563	19.163	17.79
639	19.085	22.963	24.943	18.515	19.114	17.662
639.5	19.018	22.898	24.715	18.458	19.076	17.522
640	18.963	22.874	24.486	18.401	19.025	17.44
640.5	18.84	22.806	24.299	18.327	18.878	17.355
641	18.81	22.667	24.146	18.302	18.671	17.266
641.5	18.84	22.538	24.015	18.243	18.419	17.158
642	18.894	22.429	23.968	18.213	18.22	17.047
642.5	18.819	22.329	23.915	18.151	18.127	16.94
643	18.669	22.178	23.774	18.09	18.078	16.855
643.5	18.52	22.128	23.667	18.014	18	16.76
644	18.42	22.099	23.605	17.961	17.871	16.661
644.5	18.381	22.024	23.504	17.941	17.755	16.542
645	18.341	21.807	23.261	17.905	17.644	16.437
645.5	18.309	21.59	23.022	17.808	17.483	16.339
646	18.201	21.496	22.954	17.728	17.349	16.261
646.5	18.104	21.428	22.945	17.653	17.242	16.2
647	17.977	21.327	22.778	17.55	17.17	16.185
647.5	17.948	21.131	22.522	17.435	17.074	16.121
648	17.906	20.962	22.329	17.436	16.984	15.991
648.5	17.919	20.89	22.283	17.484	16.915	15.854
649	17.887	20.865	22.233	17.547	16.872	15.758
649.5	17.882	20.848	22.15	17.562	16.802	15.698
650	17.777	20.836	22.017	17.534	16.675	15.617
650.5	17.635	20.782	21.906	17.412	16.604	15.544
651	17.522	20.766	21.765	17.254	16.527	15.451
651.5	17.556	20.755	21.787	17.179	16.499	15.349
652	17.606	20.806	21.774	17.147	16.42	15.273
652.5	17.603	20.808	21.827	17.11	16.417	15.262
653	17.532	20.707	21.719	17.088	16.419	15.295
653.5	17.546	20.631	21.597	17.132	16.417	15.319
654	17.57	20.572	21.44	17.143	16.417	15.296
654.5	17.555	20.516	21.308	17.197	16.437	15.254
655	17.442	20.439	21.206	17.194	16.403	15.165
655.5	17.331	20.349	21.144	17.204	16.296	15.146
656	17.346	20.357	21.079	17.182	16.194	15.177
656.5	17.356	20.368	21.055	17.164	16.114	15.217
657	17.389	20.395	20.975	17.156	16.048	15.179
657.5	17.336	20.4	20.93	17.138	15.99	15.064
658	17.302	20.362	20.869	17.101	15.951	15.007
658.5	17.262	20.28	20.825	17.081	15.915	14.985
659	17.266	20.175	20.708	17.044	15.814	15.006
659.5	17.282	20.101	20.562	17.023	15.722	14.967
660	17.244	20.09	20.385	17.05	15.614	14.881
660.5	17.091	20.079	20.308	17.051	15.52	14.742
661	16.983	20.038	20.271	17.049	15.455	14.635
661.5	16.966	19.948	20.242	16.965	15.4	14.584
662	17.058	19.801	20.151	16.915	15.405	14.604
662.5	17.078	19.721	20.036	16.901	15.394	14.608
663	17.076	19.704	19.92	16.982	15.334	14.552
663.5	16.994	19.742	19.776	17.018	15.237	14.411
664	17.025	19.781	19.619	17	15.136	14.311
664.5	17.007	19.828	19.435	16.87	15.058	14.278
665	16.985	19.821	19.3	16.821	14.979	14.274
665.5	16.945	19.768	19.184	16.862	14.97	14.24
666	16.97	19.7	19.132	16.973	14.958	14.191
666.5	17.059	19.699	19.094	16.994	14.929	14.173
667	17.126	19.674	19.064	16.984	14.897	14.19
667.5	17.101	19.634	19.014	16.953	14.938	14.233
668	17.019	19.638	18.951	16.981	14.991	14.266
668.5	16.896	19.637	18.883	16.982	14.917	14.239
669	16.87	19.719	18.88	16.973	14.793	14.153
669.5	16.993	19.749	18.935	17.014	14.786	14.104
670	17.157	19.794	18.953	17.108	14.826	14.076
670.5	17.228	19.719	18.892	17.159	14.854	14.088
671	17.204	19.601	18.8	17.125	14.806	14.099
671.5	17.14	19.54	18.795	17.061	14.781	14.156
672	17.157	19.553	18.844	17.09	14.795	14.231
672.5	17.192	19.642	18.902	17.125	14.793	14.253
673	17.232	19.754	18.934	17.185	14.788	14.236
673.5	17.253	19.897	18.904	17.214	14.798	14.226
674	17.282	19.981	18.885	17.264	14.837	14.255
674.5	17.326	19.965	18.85	17.275	14.922	14.319
675	17.391	19.933	18.824	17.329	14.97	14.369
675.5	17.402	19.945	18.854	17.421	14.977	14.376
676	17.403	19.958	18.914	17.471	14.972	14.342
676.5	17.408	19.938	18.969	17.466	14.959	14.32
677	17.542	19.958	18.951	17.59	14.967	14.327
677.5	17.657	20.043	18.97	17.716	14.985	14.363
678	17.762	20.14	19.037	17.746	15.045	14.401
678.5	17.79	20.184	19.05	17.598	15.109	14.499
679	17.904	20.234	19.109	17.595	15.223	14.645
679.5	18.036	20.235	19.155	17.684	15.37	14.765
680	18.128	20.34	19.23	17.761	15.469	14.804
680.5	18.104	20.437	19.285	17.772	15.465	14.841
681	18.065	20.561	19.364	17.816	15.437	14.922
681.5	18.078	20.568	19.448	17.858	15.449	14.982
682	18.125	20.541	19.511	17.874	15.525	15.035
682.5	18.222	20.604	19.656	17.923	15.589	15.063
683	18.296	20.719	19.842	17.984	15.7	15.146
683.5	18.403	20.9	20.14	18.162	15.836	15.226
684	18.484	21.008	20.408	18.267	16.009	15.305
684.5	18.602	21.027	20.695	18.33	16.171	15.405
685	18.71	20.969	20.838	18.253	16.3	15.521
685.5	18.794	20.949	21.058	18.256	16.39	15.668
686	18.808	21.003	21.259	18.316	16.517	15.807
686.5	18.835	21.188	21.568	18.453	16.716	15.9
687	18.843	21.372	21.882	18.478	16.99	16.094
687.5	19.031	21.661	22.284	18.535	17.215	16.311
688	19.223	21.957	22.716	18.602	17.542	16.588
688.5	19.455	22.293	23.17	18.817	17.912	16.855
689	19.635	22.631	23.744	19.066	18.333	17.197
689.5	19.914	23.008	24.376	19.283	18.714	17.592
690	20.272	23.415	25.019	19.499	19.146	17.964
690.5	20.666	23.812	25.564	19.67	19.613	18.319
691	20.944	24.13	26.037	19.86	20.101	18.683
691.5	21.147	24.414	26.503	20.069	20.605	19.21
692	21.33	24.727	27.053	20.34	21.143	19.792
692.5	21.681	25.229	27.736	20.648	21.733	20.38
693	22.146	25.842	28.669	21.003	22.383	20.853
693.5	22.64	26.439	29.546	21.456	23.031	21.384
694	23.097	26.997	30.349	22.01	23.656	21.965
694.5	23.544	27.592	30.998	22.518	24.261	22.569
695	24.078	28.343	31.722	22.952	24.974	23.205
695.5	24.66	29.13	32.529	23.373	25.692	23.916
696	25.183	29.796	33.397	23.814	26.414	24.626
696.5	25.721	30.401	34.209	24.313	27.126	25.351
697	26.253	31.08	34.91	24.8	27.917	26.059
697.5	26.83	31.848	35.531	25.26	28.704	26.76
698	27.298	32.573	36.157	25.75	29.527	27.393
698.5	27.796	33.301	36.825	26.248	30.204	27.986
699	28.354	34.044	37.538	26.83	30.757	28.557
699.5	28.979	34.774	38.291	27.418	31.299	29.102
700	29.651	35.462	38.941	28.004	31.941	29.754
700.5	30.248	36.191	39.519	28.558	32.672	30.458
701	30.937	36.992	40.125	29.131	33.317	31.17
701.5	31.515	37.803	40.819	29.792	34.026	31.797
702	32.086	38.669	41.564	30.385	34.711	32.336
702.5	32.587	39.481	42.336	30.901	35.409	32.858
703	33.182	40.15	43.02	31.302	35.986	33.425
703.5	33.722	40.701	43.491	31.791	36.533	34.025
704	34.171	41.281	43.907	32.367	37.028	34.538
704.5	34.552	41.966	44.321	32.996	37.571	35.09
705	34.965	42.507	44.756	33.503	38.093	35.668
705.5	35.461	43.017	45.154	33.9	38.747	36.293
706	35.932	43.541	45.648	34.302	39.375	36.758
706.5	36.401	44.265	46.216	34.791	40.028	37.257
707	36.816	44.999	46.695	35.319	40.506	37.702
707.5	37.37	45.734	47.14	35.816	41.017	38.285
708	37.944	46.346	47.591	36.28	41.466	38.78
708.5	38.503	47.011	48.078	36.792	41.982	39.215
709	39.009	47.629	48.557	37.384	42.359	39.588
709.5	39.493	48.215	49.027	37.902	42.667	40.01
710	39.887	48.707	49.444	38.331	42.948	40.41
710.5	40.253	49.183	49.838	38.805	43.438	40.856
711	40.665	49.618	50.087	39.311	44.01	41.304
711.5	41.098	50.029	50.341	39.787	44.493	41.816
712	41.505	50.56	50.655	40.239	44.91	42.316
712.5	41.854	51.111	51.047	40.695	45.303	42.763
713	42.183	51.64	51.527	41.21	45.621	43.151
713.5	42.515	52.174	51.872	41.661	45.959	43.558
714	42.935	52.804	52.195	42.085	46.345	44.021
714.5	43.445	53.433	52.5	42.463	46.771	44.388
715	43.926	53.92	52.887	42.799	47.111	44.622
715.5	44.393	54.309	53.235	43.1	47.54	44.817
716	44.714	54.795	53.514	43.41	47.969	45.137
716.5	44.923	55.186	53.737	43.858	48.333	45.454
717	45.18	55.575	53.962	44.29	48.701	45.895
717.5	45.516	55.795	54.164	44.604	49.139	46.493
718	45.936	56.278	54.45	44.965	49.54	47.106
718.5	46.314	56.768	54.772	45.441	49.847	47.433
719	46.613	57.227	54.961	45.792	50.112	47.48
719.5	46.922	57.467	55.219	45.97	50.288	47.574
720	47.285	57.877	55.534	46.265	50.514	47.876
720.5	47.683	58.461	55.895	46.753	50.787	48.229
721	47.958	58.913	56.069	47.153	51.288	48.626
721.5	48.208	59.243	56.252	47.473	51.726	48.987
722	48.508	59.499	56.491	47.76	52.021	49.275
722.5	48.828	59.973	56.786	48.182	52.223	49.547
723	49.183	60.44	57.066	48.61	52.417	49.798
723.5	49.492	60.912	57.214	49.003	52.602	50.033
724	49.713	61.258	57.408	49.275	52.703	50.273
724.5	49.951	61.534	57.649	49.395	52.838	50.519
725	50.203	61.742	57.82	49.496	53.098	50.761
725.5	50.502	61.815	57.897	49.68	53.348	50.939
726	50.654	61.995	57.94	50.002	53.567	51.049
726.5	50.794	62.465	58.139	50.342	53.826	51.22
727	50.924	62.973	58.263	50.577	54.134	51.461
727.5	51.186	63.297	58.484	50.807	54.342	51.73
728	51.496	63.519	58.677	51.056	54.395	51.918
728.5	51.677	63.802	58.945	51.304	54.62	52.09
729	51.799	64.162	59.189	51.515	54.919	52.311
729.5	51.944	64.318	59.403	51.633	55.245	52.596
730	52.143	64.432	59.503	51.749	55.267	52.843
730.5	52.222	64.551	59.479	51.789	55.298	52.992
731	52.241	64.674	59.441	51.996	55.356	53.168
731.5	52.38	64.783	59.46	52.333	55.478	53.337
732	52.756	64.767	59.63	52.641	55.533	53.409
732.5	53.108	64.794	59.863	52.801	55.602	53.374
733	53.211	64.797	60.007	52.868	55.797	53.403
733.5	53.178	64.959	60.129	53.007	56.075	53.523
734	53.249	65.208	60.251	53.08	56.205	53.66
734.5	53.446	65.539	60.331	53.197	56.251	53.837
735	53.671	65.811	60.33	53.395	56.249	53.973
735.5	53.79	66.043	60.344	53.551	56.356	54.16
736	53.857	66.307	60.465	53.655	56.482	54.294
736.5	53.829	66.467	60.561	53.628	56.55	54.323
737	53.911	66.551	60.723	53.776	56.643	54.38
737.5	54.072	66.56	60.841	54.079	56.742	54.408
738	54.209	66.706	60.909	54.307	56.922	54.468
738.5	54.321	66.921	60.869	54.457	57.058	54.588
739	54.422	67.022	60.803	54.564	57.204	54.782
739.5	54.502	66.964	60.795	54.751	57.299	54.878
740	54.49	66.988	60.88	54.875	57.307	54.893
740.5	54.464	67.067	60.955	54.823	57.243	54.953
741	54.534	67.265	61.068	54.821	57.273	55.033
741.5	54.619	67.297	61.071	54.692	57.365	55.098
742	54.759	67.376	61.198	54.677	57.532	55.175
742.5	54.869	67.407	61.318	54.735	57.584	55.247
743	54.974	67.65	61.509	54.941	57.654	55.355
743.5	55.049	67.827	61.553	55.16	57.638	55.457
744	55.17	67.886	61.577	55.221	57.593	55.364
744.5	55.255	67.824	61.426	55.112	57.475	55.242
745	55.308	67.845	61.339	55.091	57.486	55.274
745.5	55.305	67.963	61.252	55.219	57.692	55.49
746	55.221	67.966	61.261	55.369	57.844	55.569
746.5	55.188	68.013	61.399	55.424	57.889	55.575
747	55.221	68.226	61.608	55.329	57.801	55.589
747.5	55.311	68.478	61.694	55.367	57.829	55.494
748	55.387	68.585	61.628	55.483	57.921	55.638
748.5	55.441	68.624	61.592	55.588	58.023	55.828
749	55.496	68.777	61.697	55.494	58.072	55.973
749.5	55.516	68.802	61.717	55.456	58.197	55.954
750	55.548	68.725	61.679	55.64	58.261	55.889
750.5	55.536	68.579	61.534	55.765	58.254	55.831
751	55.454	68.495	61.46	55.715	58.127	55.91
751.5	55.348	68.479	61.4	55.605	58.068	55.984
752	55.328	68.566	61.455	55.589	58.036	55.956
752.5	55.411	68.753	61.573	55.754	58.041	55.791
753	55.586	68.897	61.617	55.876	58.102	55.711
753.5	55.633	68.935	61.559	55.959	58.131	55.697
754	55.581	68.787	61.44	55.969	58.173	55.834
754.5	55.51	68.651	61.461	56.016	58.217	56.001
755	55.659	68.677	61.517	56.029	58.14	56.137
755.5	55.87	68.859	61.677	56.075	58.208	56.216
756	55.961	68.896	61.758	56.113	58.237	56.143
756.5	55.785	68.741	61.764	56.065	58.288	56.087
757	55.715	68.654	61.746	55.953	58.27	56.119
757.5	55.567	68.662	61.76	55.834	58.32	56.253
758	55.611	68.821	61.709	55.783	58.439	56.237
758.5	55.646	68.719	61.692	55.862	58.508	56.153
759	55.823	68.612	61.817	55.868	58.519	56.111
759.5	55.93	68.51	61.946	55.885	58.373	56.019
760	56.042	68.63	61.961	55.881	58.272	55.94
760.5	56.034	68.834	62.015	55.876	58.307	56.035
761	55.929	69.044	62.068	55.971	58.452	56.095
761.5	55.81	69.219	62.035	56.069	58.66	56.093
762	55.803	69.097	61.92	56.072	58.762	56.052
762.5	55.882	68.952	61.875	56.036	58.787	56.14
763	55.91	68.885	61.871	55.984	58.728	56.174
763.5	55.821	68.951	61.852	55.989	58.659	56.252
764	55.698	68.994	61.789	56.084	58.601	56.254
764.5	55.688	69.043	61.855	56.149	58.562	56.245
765	55.764	68.959	61.939	56.042	58.52	56.277
765.5	55.821	68.913	61.975	55.865	58.388	56.356
766	55.913	68.874	61.825	55.898	58.273	56.378
766.5	55.955	68.825	61.716	56.033	58.309	56.366
767	55.915	68.608	61.591	56.101	58.485	56.283
767.5	55.906	68.575	61.602	56.132	58.521	56.251
768	55.99	68.58	61.637	56.13	58.432	56.275
768.5	55.971	68.663	61.597	56.275	58.416	56.401
769	55.97	68.686	61.57	56.342	58.528	56.521
769.5	55.958	68.607	61.637	56.349	58.647	56.592
770	55.91	68.436	61.746	56.115	58.696	56.424
770.5	55.833	68.345	61.866	55.982	58.637	56.238
771	55.812	68.456	61.937	56.011	58.622	56.177
771.5	55.933	68.746	61.95	56.24	58.695	56.361
772	56.121	68.867	61.764	56.181	58.747	56.433
772.5	56.079	68.877	61.681	56.015	58.618	56.399
773	56.053	68.951	61.879	55.888	58.563	56.358
773.5	56.136	69.102	62.088	56.064	58.526	56.38
774	56.284	69.084	62.032	56.258	58.568	56.392
774.5	56.244	69.062	61.781	56.314	58.632	56.378
775	56.079	69.079	61.533	56.238	58.708	56.345
775.5	55.926	69.03	61.423	56.098	58.728	56.473
776	55.866	68.82	61.572	56.058	58.777	56.554
776.5	55.898	68.744	61.752	56.061	58.816	56.558
777	55.919	68.769	61.81	56.214	58.721	56.445
777.5	55.883	68.863	61.821	56.416	58.645	56.396
778	55.889	68.924	61.755	56.446	58.602	56.36
778.5	56.042	68.896	61.713	56.352	58.644	56.314
779	56.166	68.851	61.808	56.199	58.63	56.196
779.5	56.116	68.837	61.915	56.117	58.662	56.169
780	56.055	68.923	61.916	56.081	58.549	56.188
780.5	55.944	68.914	61.788	56.07	58.586	56.303
781	55.9	68.842	61.743	56.151	58.604	56.31
781.5	55.906	68.736	61.761	56.2	58.778	56.361
782	56.025	68.77	61.92	56.264	58.883	56.371
782.5	56.033	68.819	62.009	56.173	58.941	56.335
783	55.926	68.828	62.061	56.163	58.779	56.19
783.5	55.889	68.976	62.099	56.237	58.666	56.071
784	55.918	69.116	62.095	56.324	58.74	56.076
784.5	55.87	69.029	61.977	56.299	58.868	56.17
785	55.845	68.937	61.863	56.269	58.837	56.197
785.5	55.95	68.955	61.753	56.132	58.679	56.27
786	56.047	69.069	61.768	56.001	58.552	56.397
786.5	56.031	69.139	61.858	56.047	58.591	56.468
787	56.049	69.165	61.988	56.185	58.678	56.516
787.5	56.039	69.098	62.045	56.276	58.811	56.536
788	55.975	68.901	62.037	56.244	58.81	56.527
788.5	55.83	68.947	61.864	56.191	58.769	56.339
789	55.782	68.992	61.646	56.084	58.625	56.229
789.5	55.839	69.001	61.67	56.138	58.418	56.27
790	55.903	68.908	61.677	56.241	58.353	56.429
790.5	55.902	68.981	61.831	56.23	58.359	56.512
791	55.891	69.02	61.904	56.085	58.387	56.475
791.5	55.973	69.103	61.92	56.096	58.537	56.444
792	56.072	69.196	61.861	56.235	58.606	56.378
792.5	56.198	69.316	61.774	56.412	58.632	56.18
793	56.266	69.139	61.774	56.479	58.56	56.085
793.5	56.267	68.856	61.73	56.289	58.598	56.205
794	56.141	68.738	61.822	56.048	58.497	56.263
794.5	56.133	68.938	61.903	55.96	58.413	56.132
795	56.018	68.941	61.903	56.125	58.516	56.159
795.5	55.943	68.879	61.852	56.346	58.697	56.247
796	55.904	68.698	62.019	56.387	58.748	56.337
796.5	55.932	68.628	62.147	56.335	58.691	56.375
797	55.981	68.674	62.095	56.227	58.656	56.393
797.5	55.997	68.862	61.972	56.279	58.681	56.257
798	56.031	69.039	62.024	56.358	58.698	56.179
798.5	56.034	69.192	62.01	56.38	58.712	56.187
799	56.008	69.238	61.938	56.298	58.748	56.23
799.5	56.03	69.221	61.939	56.165	58.849	56.347
800	56.019	69.205	61.951	56.244	58.895	56.47
800.5	56.148	69.296	61.953	56.519	58.828	56.45
801	56.156	69.22	61.912	56.592	58.688	56.369
801.5	56.192	69.071	61.968	56.268	58.745	56.358
802	56.24	68.892	61.887	56.057	58.959	56.497
802.5	56.265	68.883	61.85	56.134	59.086	56.584
803	56.293	69.075	61.848	56.242	58.977	56.598
803.5	56.313	69.281	61.879	56.263	58.934	56.517
804	56.27	69.345	61.899	56.256	58.815	56.532
804.5	56.17	69.334	61.924	56.295	58.606	56.477
805	56.068	69.366	61.933	56.463	58.439	56.373
805.5	56.075	69.491	61.93	56.762	58.46	56.281
806	56.053	69.501	61.855	56.861	58.49	56.248
806.5	56.084	69.537	61.811	56.812	58.669	56.332
807	56.153	69.452	61.856	56.553	58.669	56.371
807.5	56.183	69.318	61.889	56.252	58.594	56.546
808	56.167	69.325	61.964	55.988	58.528	56.572
808.5	56.05	69.532	61.986	55.973	58.467	56.506
809	56.075	69.585	61.934	56.007	58.366	56.401
809.5	56.119	69.342	61.8	55.976	58.543	56.407
810	56.256	69.152	61.794	55.937	58.729	56.274
810.5	56.268	69.145	61.836	56.001	58.784	56.19
811	56.208	69.042	61.86	56.079	58.765	56.199
811.5	56.056	68.851	61.818	55.986	58.962	56.292
812	56.083	68.827	61.769	55.884	59.048	56.263
812.5	56.216	69.001	61.623	56.015	58.938	56.307
813	56.307	69.174	61.561	56.129	58.733	56.327
813.5	56.285	69.199	61.592	56.097	58.739	56.428
814	56.111	69.164	61.677	56.095	58.68	56.35
814.5	56.092	69.16	61.846	56.248	58.556	56.218
815	56.081	69.038	61.96	56.408	58.433	56.213
815.5	56.052	68.989	61.968	56.511	58.438	56.302
816	55.92	68.985	61.905	56.408	58.506	56.258
816.5	55.845	69.015	61.864	56.224	58.62	56.117
817	55.871	68.879	61.609	56.099	58.667	56.194
817.5	55.946	68.759	61.57	56.101	58.734	56.367
818	56.083	68.766	61.608	56.111	58.888	56.552
818.5	56.011	68.716	61.584	56.147	58.822	56.551
819	55.87	68.652	61.422	56.144	58.554	56.244
819.5	55.851	68.762	61.535	56.204	58.43	56.048
820	55.971	68.876	61.603	56.233	58.382	56.126
820.5	55.922	68.936	61.584	56.335	58.446	56.258
821	55.822	68.9	61.634	56.2	58.586	56.277
821.5	55.927	69.026	61.879	56.092	58.505	56.115
822	56.113	69.061	62.006	56.129	58.46	56.065
822.5	56.187	68.97	61.889	56.176	58.541	56.192
823	56.118	68.971	61.782	56.066	58.478	56.268
823.5	55.976	69.04	61.681	55.953	58.337	56.249
824	55.749	69.014	61.529	56.045	58.306	56.329
824.5	55.6	68.91	61.432	56.16	58.369	56.457
825	55.535	68.936	61.407	56.142	58.344	56.37
825.5	55.611	69.005	61.438	55.961	58.307	56.168
826	55.764	69.063	61.631	55.993	58.302	56.034
826.5	55.936	69.097	61.891	56.312	58.397	56.026
827	56.135	69.299	61.92	56.558	58.502	56.137
827.5	56.209	69.34	61.931	56.514	58.416	56.165
828	56.28	69.275	61.83	56.355	58.317	56.04
828.5	56.317	69.23	61.739	56.163	58.439	56.051
829	56.264	69.185	61.489	56.016	58.566	56.271
829.5	56.112	69.222	61.4	55.91	58.479	56.295
830	56.071	69.292	61.515	56.009	58.227	56.122
830.5	56.068	69.398	61.682	56.025	57.994	55.982
831	55.982	69.243	61.557	55.965	57.962	56.013
831.5	55.971	69.077	61.429	55.954	58.096	56.206
832	56.103	69.149	61.484	56.12	58.467	56.238
832.5	56.282	69.419	61.721	56.217	58.718	56.079
833	56.434	69.454	61.915	56.205	58.554	55.921
833.5	56.309	69.193	61.873	56.051	58.386	56.093
834	56.071	69.04	61.644	56.015	58.342	56.136
834.5	55.914	68.991	61.539	56.031	58.522	56.051
835	55.956	68.987	61.532	56.105	58.436	55.9
835.5	55.984	68.826	61.42	56.158	58.386	55.945
836	56.071	68.871	61.511	56.301	58.32	56.072
836.5	56.137	69.05	61.683	56.301	58.374	56.077
837	56.053	69.184	61.844	56.058	58.489	55.999
837.5	55.99	69.075	61.799	55.784	58.584	55.967
838	56.072	68.965	61.747	55.778	58.633	56.105
838.5	56.197	68.977	61.66	55.926	58.611	56.236
839	56.298	69.187	61.642	56.066	58.769	56.267
839.5	56.341	69.303	61.734	56.077	58.694	56.244
840	56.329	69.206	61.791	55.982	58.615	56.205
840.5	56.198	69.095	61.777	55.985	58.493	56.092
841	56.04	69.058	61.632	56.035	58.471	55.921
841.5	56.061	69.264	61.619	56.1	58.368	55.868
842	56.254	69.484	61.705	56.11	58.272	55.922
842.5	56.299	69.333	61.705	56.14	58.081	55.997
843	56.273	69.288	61.775	56.175	57.923	55.929
843.5	55.967	69.213	61.567	56.055	57.965	55.926
844	55.825	69.316	61.566	55.979	58.114	55.998
844.5	55.788	69.357	61.612	55.976	58.173	56.041
845	55.909	69.321	61.751	56.125	58.18	56.022
845.5	55.91	69.135	61.634	56.026	58.141	56.036
846	55.879	68.965	61.517	55.871	57.937	55.918
846.5	55.751	68.738	61.627	55.912	57.801	55.784
847	55.764	68.85	61.84	56.088	57.908	55.802
847.5	55.857	69.066	61.729	56.057	58.048	55.98
848	55.892	69.183	61.473	55.936	58.072	56.192
848.5	21.768	26.841	23.84	21.704	22.621	21.826

## Sheet: Sheet2
" File:	Users\t4chr\Desktop\spectrometer data qu
" TRANS	-> Wave:564.75nm Pix:1050 Val: 27.004 Time:500ms Avg:3 Sm:1 Sg:0 Tc:off SNAP Xt:3 Ch:1 Xtrig
184	0.001
184.5	0.001
185	0.001
185.5	0.001
186	0.001
186.5	0.001
187	0.001
187.5	0.001
188	0.001
188.5	0.001
189	0.001
189.5	277.71
190	-3412.8
190.5	-209.72
191	-141.41
191.5	-164.6
192	-138.55
192.5	-109.67
193	-96.35
193.5	-92.193
194	-102.3
194.5	-126.94
195	-155.81
195.5	-183.86
196	-218.46
196.5	-219.26
197	-193.54
197.5	-165.03
198	-142.83
198.5	-143.31
199	-146.03
199.5	-147.89
200	-132.75
200.5	-115.98
201	-113.19
201.5	-120.67
202	-137.64
202.5	-154.94
203	-156.7
203.5	-137.28
204	-141.05
204.5	-143.9
205	-133.86
205.5	-127.09
206	-104.75
206.5	-78.449
207	-62.025
207.5	-55.178
208	-53.152
208.5	-65.974
209	-80.756
209.5	-91.74
210	-97.689
210.5	-89.551
211	-87.274
211.5	-91.784
212	-105.82
212.5	-117.39
213	-116.71
213.5	-108.32
214	-89.334
214.5	-71.995
215	-66.736
215.5	-65.3
216	-70.138
216.5	-80.284
217	-76.518
217.5	-64.149
218	-53.249
218.5	-46.57
219	-50.127
219.5	-60.187
220	-68.964
220.5	-75.153
221	-74.107
221.5	-66.571
222	-58.572
222.5	-57.274
223	-57.633
223.5	-60.063
224	-64.83
224.5	-67.745
225	-70.02
225.5	-67.385
226	-62.903
226.5	-58.408
227	-51.373
227.5	-47.235
228	-44.903
228.5	-35.799
229	-26.413
229.5	-17.286
230	-7.988
230.5	-3.7672
231	-0.39258
231.5	2.9633
232	6.9983
232.5	11.185
233	13.914
233.5	16.101
234	18.292
234.5	20.973
235	23.835
235.5	26.354
236	27.837
236.5	28.425
237	28.886
237.5	29.05
238	29.227
238.5	29.727
239	29.924
239.5	29.949
240	29.919
240.5	29.622
241	29.421
241.5	29.302
242	29.14
242.5	29.104
243	29.17
243.5	29.202
244	29.314
244.5	29.328
245	29.192
245.5	29.179
246	29.162
246.5	29.103
247	29.052
247.5	28.854
248	28.591
248.5	28.409
249	28.335
249.5	28.355
250	28.397
250.5	28.375
251	28.227
251.5	28.069
252	27.925
252.5	27.821
253	27.785
253.5	27.699
254	27.544
254.5	27.371
255	27.179
255.5	27.042
256	26.977
256.5	26.86
257	26.763
257.5	26.629
258	26.48
258.5	26.427
259	26.347
259.5	26.296
260	26.241
260.5	26.098
261	25.969
261.5	25.814
262	25.642
262.5	25.478
263	25.31
263.5	25.182
264	25.127
264.5	25.134
265	25.179
265.5	25.168
266	25.076
266.5	24.91
267	24.699
267.5	24.511
268	24.342
268.5	24.234
269	24.165
269.5	24.124
270	24.095
270.5	24.034
271	23.946
271.5	23.866
272	23.801
272.5	23.712
273	23.628
273.5	23.514
274	23.476
274.5	23.525
275	23.512
275.5	23.473
276	23.37
276.5	23.231
277	23.179
277.5	23.171
278	23.132
278.5	23.12
279	23.052
279.5	23.005
280	22.913
280.5	22.755
281	22.576
281.5	22.415
282	22.344
282.5	22.368
283	22.46
283.5	22.522
284	22.491
284.5	22.408
285	22.255
285.5	22.09
286	21.961
286.5	21.829
287	21.748
287.5	21.669
288	21.62
288.5	21.57
289	21.485
289.5	21.437
290	21.377
290.5	21.309
291	21.312
291.5	21.315
292	21.337
292.5	21.407
293	21.416
293.5	21.406
294	21.413
294.5	21.409
295	21.417
295.5	21.403
296	21.384
296.5	21.346
297	21.346
297.5	21.364
298	21.337
298.5	21.33
299	21.293
299.5	21.238
300	21.204
300.5	21.147
301	21.08
301.5	21.026
302	20.944
302.5	20.859
303	20.776
303.5	20.709
304	20.679
304.5	20.671
305	20.727
305.5	20.779
306	20.776
306.5	20.776
307	20.701
307.5	20.593
308	20.484
308.5	20.349
309	20.276
309.5	20.203
310	20.182
310.5	20.168
311	20.09
311.5	20.03
312	20.017
312.5	19.959
313	19.973
313.5	20.028
314	20.015
314.5	19.974
315	19.899
315.5	19.776
316	19.643
316.5	19.567
317	19.507
317.5	19.513
318	19.548
318.5	19.543
319	19.49
319.5	19.395
320	19.345
320.5	19.319
321	19.306
321.5	19.257
322	19.176
322.5	19.135
323	19.112
323.5	19.105
324	19.036
324.5	18.912
325	18.785
325.5	18.74
326	18.803
326.5	18.851
327	18.874
327.5	18.793
328	18.658
328.5	18.556
329	18.5
329.5	18.511
330	18.559
330.5	18.561
331	18.459
331.5	18.344
332	18.21
332.5	18.148
333	18.162
333.5	18.127
334	18.087
334.5	18.002
335	17.89
335.5	17.837
336	17.824
336.5	17.833
337	17.801
337.5	17.752
338	17.655
338.5	17.613
339	17.65
339.5	17.657
340	17.602
340.5	17.484
341	17.365
341.5	17.349
342	17.408
342.5	17.477
343	17.565
343.5	17.581
344	17.49
344.5	17.32
345	17.107
345.5	17.013
346	16.946
346.5	16.931
347	16.975
347.5	16.979
348	16.996
348.5	16.987
349	16.837
349.5	16.725
350	16.652
350.5	16.647
351	16.675
351.5	16.624
352	16.606
352.5	16.548
353	16.423
353.5	16.369
354	16.293
354.5	16.219
355	16.226
355.5	16.191
356	16.134
356.5	16.027
357	15.894
357.5	15.773
358	15.74
358.5	15.698
359	15.626
359.5	15.478
360	15.349
360.5	15.287
361	15.243
361.5	15.253
362	15.303
362.5	15.373
363	15.364
363.5	15.315
364	15.245
364.5	15.231
365	15.273
365.5	15.234
366	15.089
366.5	14.905
367	14.766
367.5	14.759
368	14.889
368.5	14.969
369	14.894
369.5	14.723
370	14.602
370.5	14.582
371	14.742
371.5	14.71
372	14.511
372.5	14.378
373	14.298
373.5	14.419
374	14.537
374.5	14.468
375	14.336
375.5	14.268
376	14.333
376.5	14.43
377	14.473
377.5	14.493
378	14.457
378.5	14.475
379	14.563
379.5	14.667
380	14.785
380.5	14.84
381	14.676
381.5	14.522
382	14.389
382.5	14.427
383	14.433
383.5	14.276
384	14.034
384.5	13.823
385	13.87
385.5	14.021
386	14.119
386.5	14.185
387	14.196
387.5	14.172
388	14.095
388.5	14.033
389	13.973
389.5	13.993
390	14.181
390.5	14.326
391	14.36
391.5	14.316
392	14.11
392.5	13.836
393	13.652
393.5	13.534
394	13.364
394.5	13.392
395	13.47
395.5	13.586
396	13.762
396.5	13.774
397	13.722
397.5	13.614
398	13.579
398.5	13.655
399	13.692
399.5	13.779
400	13.876
400.5	13.862
401	13.731
401.5	13.461
402	13.209
402.5	13.012
403	12.994
403.5	12.96
404	12.945
404.5	13.005
405	12.925
405.5	12.922
406	13.018
406.5	13.175
407	13.319
407.5	13.423
408	13.433
408.5	13.372
409	13.442
409.5	13.482
410	13.448
410.5	13.483
411	13.422
411.5	13.384
412	13.407
412.5	13.4
413	13.366
413.5	13.332
414	13.304
414.5	13.375
415	13.439
415.5	13.609
416	13.792
416.5	13.861
417	13.801
417.5	13.692
418	13.477
418.5	13.477
419	13.517
419.5	13.591
420	13.724
420.5	13.718
421	13.727
421.5	13.756
422	13.867
422.5	13.983
423	13.917
423.5	13.682
424	13.445
424.5	13.308
425	13.378
425.5	13.491
426	13.638
426.5	13.723
427	13.701
427.5	13.658
428	13.649
428.5	13.693
429	13.676
429.5	13.657
430	13.65
430.5	13.644
431	13.741
431.5	13.699
432	13.643
432.5	13.648
433	13.568
433.5	13.663
434	13.658
434.5	13.71
435	13.743
435.5	13.755
436	13.82
436.5	13.802
437	13.747
437.5	13.618
438	13.569
438.5	13.58
439	13.633
439.5	13.658
440	13.614
440.5	13.565
441	13.526
441.5	13.513
442	13.573
442.5	13.639
443	13.642
443.5	13.639
444	13.669
444.5	13.747
445	13.848
445.5	13.857
446	13.767
446.5	13.623
447	13.575
447.5	13.5
448	13.51
448.5	13.549
449	13.642
449.5	13.697
450	13.709
450.5	13.688
451	13.724
451.5	13.85
452	13.906
452.5	13.801
453	13.639
453.5	13.538
454	13.568
454.5	13.709
455	13.825
455.5	13.918
456	13.964
456.5	13.901
457	13.768
457.5	13.661
458	13.658
458.5	13.715
459	13.767
459.5	13.8
460	13.817
460.5	13.824
461	13.735
461.5	13.67
462	13.619
462.5	13.625
463	13.649
463.5	13.685
464	13.731
464.5	13.749
465	13.741
465.5	13.725
466	13.731
466.5	13.763
467	13.771
467.5	13.739
468	13.69
468.5	13.541
469	13.486
469.5	13.421
470	13.482
470.5	13.587
471	13.663
471.5	13.685
472	13.706
472.5	13.77
473	13.816
473.5	13.828
474	13.727
474.5	13.668
475	13.623
475.5	13.664
476	13.682
476.5	13.692
477	13.655
477.5	13.55
478	13.466
478.5	13.434
479	13.469
479.5	13.543
480	13.636
480.5	13.71
481	13.75
481.5	13.742
482	13.69
482.5	13.646
483	13.664
483.5	13.701
484	13.791
484.5	13.845
485	13.801
485.5	13.757
486	13.741
486.5	13.801
487	13.899
487.5	13.959
488	13.964
488.5	13.968
489	13.928
489.5	13.863
490	13.811
490.5	13.776
491	13.809
491.5	13.898
492	13.926
492.5	13.974
493	14.001
493.5	14.049
494	14.113
494.5	14.147
495	14.201
495.5	14.265
496	14.316
496.5	14.371
497	14.399
497.5	14.428
498	14.441
498.5	14.453
499	14.507
499.5	14.563
500	14.647
500.5	14.733
501	14.82
501.5	14.909
502	14.963
502.5	15.016
503	15.127
503.5	15.25
504	15.4
504.5	15.483
505	15.53
505.5	15.606
506	15.782
506.5	16.01
507	16.193
507.5	16.268
508	16.328
508.5	16.459
509	16.676
509.5	16.875
510	17.094
510.5	17.298
511	17.501
511.5	17.675
512	17.83
512.5	17.953
513	18.127
513.5	18.3
514	18.506
514.5	18.732
515	18.976
515.5	19.246
516	19.552
516.5	19.855
517	20.088
517.5	20.36
518	20.613
518.5	20.899
519	21.103
519.5	21.3
520	21.529
520.5	21.768
521	22.035
521.5	22.242
522	22.518
522.5	22.818
523	23.065
523.5	23.316
524	23.509
524.5	23.735
525	23.984
525.5	24.2
526	24.431
526.5	24.632
527	24.86
527.5	25.036
528	25.169
528.5	25.363
529	25.534
529.5	25.718
530	25.786
530.5	25.826
531	25.881
531.5	26.001
532	26.156
532.5	26.313
533	26.448
533.5	26.541
534	26.701
534.5	26.844
535	26.984
535.5	27.106
536	27.177
536.5	27.231
537	27.249
537.5	27.309
538	27.408
538.5	27.529
539	27.606
539.5	27.604
540	27.606
540.5	27.614
541	27.661
541.5	27.731
542	27.755
542.5	27.829
543	27.986
543.5	28.082
544	28.091
544.5	28.028
545	28.005
545.5	28.068
546	28.162
546.5	28.287
547	28.405
547.5	28.442
548	28.337
548.5	28.306
549	28.342
549.5	28.465
550	28.505
550.5	28.459
551	28.465
551.5	28.489
552	28.535
552.5	28.472
553	28.44
553.5	28.422
554	28.467
554.5	28.481
555	28.456
555.5	28.445
556	28.427
556.5	28.406
557	28.415
557.5	28.428
558	28.412
558.5	28.306
559	28.157
559.5	27.998
560	27.894
560.5	27.828
561	27.815
561.5	27.785
562	27.69
562.5	27.633
563	27.548
563.5	27.457
564	27.272
564.5	27.09
565	26.949
565.5	26.863
566	26.78
566.5	26.729
567	26.622
567.5	26.509
568	26.321
568.5	26.132
569	25.985
569.5	25.886
570	25.739
570.5	25.538
571	25.37
571.5	25.301
572	25.283
572.5	25.227
573	25.106
573.5	25.004
574	24.865
574.5	24.761
575	24.572
575.5	24.467
576	24.396
576.5	24.34
577	24.237
577.5	24.03
578	23.874
578.5	23.759
579	23.631
579.5	23.506
580	23.327
580.5	23.263
581	23.201
581.5	23.131
582	23.004
582.5	22.906
583	22.916
583.5	22.963
584	22.939
584.5	22.864
585	22.8
585.5	22.688
586	22.514
586.5	22.289
587	22.173
587.5	22.144
588	22.202
588.5	22.191
589	22.158
589.5	22.048
590	21.937
590.5	21.9
591	21.904
591.5	21.908
592	21.873
592.5	21.903
593	21.933
593.5	21.892
594	21.766
594.5	21.66
595	21.649
595.5	21.612
596	21.551
596.5	21.477
597	21.523
597.5	21.571
598	21.572
598.5	21.539
599	21.469
599.5	21.453
600	21.414
600.5	21.344
601	21.282
601.5	21.198
602	21.183
602.5	21.189
603	21.153
603.5	21.056
604	20.983
604.5	20.956
605	21.01
605.5	20.988
606	20.911
606.5	20.825
607	20.67
607.5	20.549
608	20.426
608.5	20.408
609	20.433
609.5	20.417
610	20.356
610.5	20.238
611	20.134
611.5	20.08
612	20.012
612.5	19.967
613	19.88
613.5	19.832
614	19.765
614.5	19.639
615	19.514
615.5	19.417
616	19.37
616.5	19.321
617	19.317
617.5	19.346
618	19.405
618.5	19.328
619	19.161
619.5	18.992
620	18.946
620.5	18.943
621	18.957
621.5	18.916
622	18.87
622.5	18.828
623	18.766
623.5	18.666
624	18.601
624.5	18.593
625	18.608
625.5	18.638
626	18.631
626.5	18.636
627	18.648
627.5	18.604
628	18.558
628.5	18.502
629	18.493
629.5	18.519
630	18.533
630.5	18.506
631	18.495
631.5	18.493
632	18.523
632.5	18.523
633	18.476
633.5	18.426
634	18.444
634.5	18.405
635	18.353
635.5	18.24
636	18.178
636.5	18.134
637	18.054
637.5	17.998
638	17.918
638.5	17.79
639	17.662
639.5	17.522
640	17.44
640.5	17.355
641	17.266
641.5	17.158
642	17.047
642.5	16.94
643	16.855
643.5	16.76
644	16.661
644.5	16.542
645	16.437
645.5	16.339
646	16.261
646.5	16.2
647	16.185
647.5	16.121
648	15.991
648.5	15.854
649	15.758
649.5	15.698
650	15.617
650.5	15.544
651	15.451
651.5	15.349
652	15.273
652.5	15.262
653	15.295
653.5	15.319
654	15.296
654.5	15.254
655	15.165
655.5	15.146
656	15.177
656.5	15.217
657	15.179
657.5	15.064
658	15.007
658.5	14.985
659	15.006
659.5	14.967
660	14.881
660.5	14.742
661	14.635
661.5	14.584
662	14.604
662.5	14.608
663	14.552
663.5	14.411
664	14.311
664.5	14.278
665	14.274
665.5	14.24
666	14.191
666.5	14.173
667	14.19
667.5	14.233
668	14.266
668.5	14.239
669	14.153
669.5	14.104
670	14.076
670.5	14.088
671	14.099
671.5	14.156
672	14.231
672.5	14.253
673	14.236
673.5	14.226
674	14.255
674.5	14.319
675	14.369
675.5	14.376
676	14.342
676.5	14.32
677	14.327
677.5	14.363
678	14.401
678.5	14.499
679	14.645
679.5	14.765
680	14.804
680.5	14.841
681	14.922
681.5	14.982
682	15.035
682.5	15.063
683	15.146
683.5	15.226
684	15.305
684.5	15.405
685	15.521
685.5	15.668
686	15.807
686.5	15.9
687	16.094
687.5	16.311
688	16.588
688.5	16.855
689	17.197
689.5	17.592
690	17.964
690.5	18.319
691	18.683
691.5	19.21
692	19.792
692.5	20.38
693	20.853
693.5	21.384
694	21.965
694.5	22.569
695	23.205
695.5	23.916
696	24.626
696.5	25.351
697	26.059
697.5	26.76
698	27.393
698.5	27.986
699	28.557
699.5	29.102
700	29.754
700.5	30.458
701	31.17
701.5	31.797
702	32.336
702.5	32.858
703	33.425
703.5	34.025
704	34.538
704.5	35.09
705	35.668
705.5	36.293
706	36.758
706.5	37.257
707	37.702
707.5	38.285
708	38.78
708.5	39.215
709	39.588
709.5	40.01
710	40.41
710.5	40.856
711	41.304
711.5	41.816
712	42.316
712.5	42.763
713	43.151
713.5	43.558
714	44.021
714.5	44.388
715	44.622
715.5	44.817
716	45.137
716.5	45.454
717	45.895
717.5	46.493
718	47.106
718.5	47.433
719	47.48
719.5	47.574
720	47.876
720.5	48.229
721	48.626
721.5	48.987
722	49.275
722.5	49.547
723	49.798
723.5	50.033
724	50.273
724.5	50.519
725	50.761
725.5	50.939
726	51.049
726.5	51.22
727	51.461
727.5	51.73
728	51.918
728.5	52.09
729	52.311
729.5	52.596
730	52.843
730.5	52.992
731	53.168
731.5	53.337
732	53.409
732.5	53.374
733	53.403
733.5	53.523
734	53.66
734.5	53.837
735	53.973
735.5	54.16
736	54.294
736.5	54.323
737	54.38
737.5	54.408
738	54.468
738.5	54.588
739	54.782
739.5	54.878
740	54.893
740.5	54.953
741	55.033
741.5	55.098
742	55.175
742.5	55.247
743	55.355
743.5	55.457
744	55.364
744.5	55.242
745	55.274
745.5	55.49
746	55.569
746.5	55.575
747	55.589
747.5	55.494
748	55.638
748.5	55.828
749	55.973
749.5	55.954
750	55.889
750.5	55.831
751	55.91
751.5	55.984
752	55.956
752.5	55.791
753	55.711
753.5	55.697
754	55.834
754.5	56.001
755	56.137
755.5	56.216
756	56.143
756.5	56.087
757	56.119
757.5	56.253
758	56.237
758.5	56.153
759	56.111
759.5	56.019
760	55.94
760.5	56.035
761	56.095
761.5	56.093
762	56.052
762.5	56.14
763	56.174
763.5	56.252
764	56.254
764.5	56.245
765	56.277
765.5	56.356
766	56.378
766.5	56.366
767	56.283
767.5	56.251
768	56.275
768.5	56.401
769	56.521
769.5	56.592
770	56.424
770.5	56.238
771	56.177
771.5	56.361
772	56.433
772.5	56.399
773	56.358
773.5	56.38
774	56.392
774.5	56.378
775	56.345
775.5	56.473
776	56.554
776.5	56.558
777	56.445
777.5	56.396
778	56.36
778.5	56.314
779	56.196
779.5	56.169
780	56.188
780.5	56.303
781	56.31
781.5	56.361
782	56.371
782.5	56.335
783	56.19
783.5	56.071
784	56.076
784.5	56.17
785	56.197
785.5	56.27
786	56.397
786.5	56.468
787	56.516
787.5	56.536
788	56.527
788.5	56.339
789	56.229
789.5	56.27
790	56.429
790.5	56.512
791	56.475
791.5	56.444
792	56.378
792.5	56.18
793	56.085
793.5	56.205
794	56.263
794.5	56.132
795	56.159
795.5	56.247
796	56.337
796.5	56.375
797	56.393
797.5	56.257
798	56.179
798.5	56.187
799	56.23
799.5	56.347
800	56.47
800.5	56.45
801	56.369
801.5	56.358
802	56.497
802.5	56.584
803	56.598
803.5	56.517
804	56.532
804.5	56.477
805	56.373
805.5	56.281
806	56.248
806.5	56.332
807	56.371
807.5	56.546
808	56.572
808.5	56.506
809	56.401
809.5	56.407
810	56.274
810.5	56.19
811	56.199
811.5	56.292
812	56.263
812.5	56.307
813	56.327
813.5	56.428
814	56.35
814.5	56.218
815	56.213
815.5	56.302
816	56.258
816.5	56.117
817	56.194
817.5	56.367
818	56.552
818.5	56.551
819	56.244
819.5	56.048
820	56.126
820.5	56.258
821	56.277
821.5	56.115
822	56.065
822.5	56.192
823	56.268
823.5	56.249
824	56.329
824.5	56.457
825	56.37
825.5	56.168
826	56.034
826.5	56.026
827	56.137
827.5	56.165
828	56.04
828.5	56.051
829	56.271
829.5	56.295
830	56.122
830.5	55.982
831	56.013
831.5	56.206
832	56.238
832.5	56.079
833	55.921
833.5	56.093
834	56.136
834.5	56.051
835	55.9
835.5	55.945
836	56.072
836.5	56.077
837	55.999
837.5	55.967
838	56.105
838.5	56.236
839	56.267
839.5	56.244
840	56.205
840.5	56.092
841	55.921
841.5	55.868
842	55.922
842.5	55.997
843	55.929
843.5	55.926
844	55.998
844.5	56.041
845	56.022
845.5	56.036
846	55.918
846.5	55.784
847	55.802
847.5	55.98
848	56.192
848.5	21.826
