# Supplementary material for: Tomato yellow leaf curl virus manipulates Bemisia tabaci, MEAM1 both directly and indirectly through changes in visual and volatile cues
Source: PeerJ. 2024 Jul 23;12:e17665. doi: 10.7717/peerj.17665 (PMC11276755; doi:10.7717/peerj.17665)
Supplement: Supplemental Information 10 [file peerj-12-17665-s010.xlsx]

## Sheet: Sheet1
wavelength	1.21.tylcv.inf.t1r2.greenpot1	1.21.tylcv.inf.t1r2.greenspot1	jan27.b16.infected.2wk.vol+leaf.1green.SSM	jan23.c13.healthy.2wk.vol+leaf.1green	jan26.d21.infected.2wk.1green.SSM	jan26.d21.infected.2wk.g1.2.SSM	b.33.feb.10.2wk.infected.g1		g1a.tylcv.2weekinfested.tomato leaves.	g1b.tylcv.2weekinfested.tomato leaves.	g1b.tylcv.2weekinfested.tomato leaves.2.24.21.tylcv.2weekinfested.tomato leaves.2.24.21	g1a.3.3.21.tylcv.tomatoleaf.2months	g1a.march2.2month	g1b.3.3.21.tylcv.tomatoleaf.2months	g1b.march2.2month	g1.2wk.infected.mar30	g1.2wk.infected.mar31	1g.2week.infected.4.20	1g.2week.infected.4.21	g1.4.27.21.2monthinfected	g1.4.28.21.2monthinfected
184	0.001	0.001	0.00014006	0.00014006	0.00014006	0.00014006	0.001	0.001	0.001	0.001	0.001	0.001	0.001	0.001	0.001	0.001	0.001	0.001	0.001	0.001	0.001
184.5	0.001	0.001	0.001	0.001	0.001	0.001	0.001	0.001	0.001	0.001	0.001	0.001	0.001	0.001	0.001	0.001	0.001	0.001	0.001	0.001	0.001
185	0.001	0.001	0.001	0.001	0.001	0.001	0.001	0.001	0.001	0.001	0.001	0.001	0.001	0.001	0.001	0.001	0.001	0.001	0.001	0.001	0.001
185.5	0.001	0.001	0.001	0.001	0.001	0.001	0.001	0.001	0.001	0.001	0.001	0.001	0.001	0.001	0.001	0.001	0.001	0.001	0.001	0.001	0.001
186	0.001	0.001	0.001	0.001	0.001	0.001	0.001	0.001	0.001	0.001	0.001	0.001	0.001	0.001	0.001	0.001	0.001	0.001	0.001	0.001	0.001
186.5	0.001	0.001	0.001	0.001	0.001	0.001	0.001	0.001	0.001	0.001	0.001	0.001	0.001	0.001	0.001	0.001	0.001	0.001	0.001	0.001	0.001
187	0.001	0.001	0.001	0.001	0.001	0.001	0.001	0.001	0.001	0.001	0.001	0.001	0.001	0.001	0.001	0.001	0.001	0.001	0.001	0.001	0.001
187.5	0.001	0.001	0.001	0.001	0.001	0.001	0.001	0.001	0.001	0.001	0.001	0.001	0.001	0.001	0.001	0.001	0.001	0.001	0.001	0.001	0.001
188	0.001	0.001	0.001	0.001	0.001	0.001	0.001	0.001	0.001	0.001	0.001	0.001	0.001	0.001	0.001	0.001	0.001	0.001	0.001	0.001	0.001
188.5	0.001	0.001	0.001	0.001	0.001	0.001	0.001	0.001	0.001	0.001	0.001	0.001	0.001	0.001	0.001	0.001	0.001	0.001	0.001	0.001	0.001
189	0.001	0.001	13.53	37.92	16.074	13.703	0.001	0.001	0.001	0.001	0.001	0.001	0.001	0.001	0.001	0.001	0.001	0.001	0.001	0.001	0.001
189.5	-129.97	-245.89	78.489	126.23	93.081	77.613	120.9	2587.6	769.76	1709.1	63.954	39.142	50.014	50.739	-46.389	112.67	114.77	-49.101	-128.65	45.22	60.887
190	-85.985	-188.48	183.88	47.443	222.66	187.08	-1258.4	273.46	36.924	170.65	107.43	47.454	35.184	41.804	-10.875	-46.929	-58.482	-156.29	-176.7	66.748	-1.6625
190.5	-85.462	-99.594	297.37	16.332	394.96	373.29	-80.594	-282.2	-131.42	-183.91	141.77	31.772	5.4582	-0.9779	-4.1657	-22.458	-31.805	-91.944	-211.43	74.122	-34.831
191	-50.936	-63.726	309.35	32.436	416.47	416.2	-65.115	-179.05	-76.796	-134.37	186.69	33.891	20.913	15.346	8.7733	-8.462	-25.74	18	-359.94	72.376	13.759
191.5	-23.217	-57.736	333.51	40.089	435.72	443.6	-58.601	-160.35	-59.044	-114.79	191.89	25.312	14.228	20.408	9.5863	19.232	-20.06	200.84	320.88	70.144	-5.6269
192	-17.588	-51.537	395.31	35.827	490.85	499.9	-38.04	-175.74	-64.011	-124.51	185.11	30.75	4.4276	16.925	-3.6741	17.013	-19.132	207.45	270.06	71.31	-80.886
192.5	-22.512	-55.726	471.52	30.353	577.67	581.81	-23.06	-174.31	-65.263	-125.38	174.72	35.237	0.47113	11.409	-16.784	9.8116	-17.409	218.28	243.86	74.653	-180.71
193	-31.575	-60.92	756.31	28.12	949.51	942.84	-20.421	-144.34	-53.27	-113.07	173.6	29.454	1.213	6.4472	-22.763	-1.4531	-20.859	283.57	283.02	77.708	-222.47
193.5	-44.864	-67.487	1257.6	30.171	1684.5	1582.2	-22.954	-124.74	-42.457	-105.31	178.98	27.182	3.9442	4.1069	-21.745	-9.8313	-27.854	724.1	674	78.07	-65.326
194	-51.895	-65.912	1723.8	33.777	2374.3	2141.9	-31.649	-121.83	-33.235	-106.64	189.68	24.344	1.1145	6.3949	-21.937	-20.451	-39.052	-57.363	-128.99	76.214	33.985
194.5	-48.526	-56.77	1309.9	34.501	1729.5	1537.4	-49.508	-137.46	-32.568	-125.81	208.3	22.089	-5.247	9.2773	-23.254	-32.248	-50.443	-266.68	-306.3	69.728	69.013
195	-50.915	-54.715	722.42	31.064	903.12	786.86	-70.935	-180.08	-43.559	-167.49	214.25	25.581	-15.365	7.3182	-26.07	-27.122	-50.433	-168.62	-187	63.606	80.167
195.5	-45.452	-56.985	512.71	25.947	621.13	546.73	-87.342	-218.7	-54.611	-209.42	209.13	22.567	-19.591	3.3813	-27.36	-13.536	-37.341	-327.15	-338.69	59.341	65.956
196	-45.346	-67.768	407.51	20.84	489.85	452.98	-113.95	-233.73	-59.107	-222.85	205.48	19.588	-11.059	-0.83658	-19.99	0.78668	-17.133	99.361	62.154	57.266	47.662
196.5	-45.233	-76.273	365.34	18.052	459.53	452.7	-113.34	-220.43	-54.069	-204.56	207.04	21.598	0.13446	-0.31145	-10.462	8.4937	-7.0438	299.34	286.04	55.638	31.009
197	-40.557	-75.711	371.02	19.455	497.93	518.23	-87.274	-179.16	-43.533	-162.13	211.81	26.959	9.2819	7.7699	-2.4121	6.7542	-8.2935	201.63	208.73	52.575	22.514
197.5	-36.431	-62.645	409.81	24.595	550.65	611.69	-74.139	-156.24	-42.122	-133.74	216.45	31.491	14.882	15.87	1.8927	-1.95	-13.241	313.81	334.84	53.325	18.638
198	-36.671	-51.469	486.04	28.837	633.98	734.35	-60.086	-157.38	-51.622	-133.83	204.73	33.793	14.066	25.426	3.9263	-12.241	-26.39	548.35	795.7	55.418	27.117
198.5	-40.279	-42.463	608.74	33.445	782.53	908.3	-56.143	-161.25	-59.857	-138.79	185.1	38.515	12.765	36.511	4.9611	-17.112	-38.202	1673.9	3649.6	59.325	33.38
199	-41.466	-31.839	737.21	38.299	932.27	1054.6	-53.525	-166.93	-62.408	-142.24	172.18	41.806	13.335	41.22	3.0845	-14.458	-39.744	685.75	1980.7	67.168	30.442
199.5	-40.176	-31.533	858.91	37.364	1033.3	1112.4	-46.532	-164.03	-58.944	-138.88	175.41	41.321	11.624	39.08	-0.83081	-7.777	-35.722	403.72	1122.1	71.667	40.14
200	-33.169	-31.276	1461.9	34.75	1696.6	1748.4	-38.523	-160.81	-53.541	-129.49	190.85	41.265	11.097	36.359	2.2628	0.020957	-30.045	363.78	658.09	71.095	32.218
200.5	-30.601	-36.359	2183.9	31.204	2480.4	2489.3	-32.792	-149.26	-44.992	-113.65	214.48	37.755	8.2765	29.768	5.8664	7.6001	-20.917	433.67	496.49	69.097	18.917
201	-26.206	-43.444	1660	26.57	1854.2	1823.3	-35.909	-144.21	-44.633	-105.66	251.14	37.386	5.4781	23.236	6.7271	7.4598	-10.909	936.04	695.98	66.553	-2.5785
201.5	-26.678	-49.255	1037	22.744	1180.8	1131.3	-42.111	-142.23	-45.443	-104.69	277.35	43.957	3.7693	22.953	12.205	6.6256	-6.1913	3697.5	2160.5	63.022	-82.798
202	-32.561	-54.222	1005.7	21.617	1173.4	1112.9	-49.73	-131.22	-43.408	-102.57	274.31	45.756	-1.6363	17.184	9.5062	4.34	-5.0793	-583.8	-382.7	60.424	-224.26
202.5	-31.34	-58.085	842.44	21.882	1010.7	955.55	-58.207	-120.31	-35.689	-96.457	264.91	42.516	-5.1417	8.9916	4.8729	-3.0105	-7.3488	-131.31	-147.37	59.011	-223.73
203	-36.044	-60.105	760.5	23.041	930.94	873.76	-56.079	-115.52	-23.775	-90.178	248.76	38.573	-7.729	5.6223	6.4101	-6.8951	-11.691	-35.823	-118.98	57.746	-306.51
203.5	-44.894	-60.246	878.29	24.988	1064.9	1009	-49.5	-122.31	-21.325	-94.958	219.94	30.113	-7.3831	-0.43565	5.4542	-7.6152	-18.636	-11.87	-95.529	56.857	-256.2
204	-48.353	-61.87	1018.9	24.556	1216.2	1220.5	-51.032	-125.89	-25.01	-101.83	211.66	25.253	-4.1959	-3.9123	3.2865	-1.5109	-21.094	-44.559	-94.592	56.488	-122.43
204.5	-40.167	-43.281	1802.8	23.088	2097.6	2219.2	-52.923	-135.55	-40.692	-116.19	208.48	22.776	-2.7549	0.77223	2.401	10.048	-22.542	-205.44	-184.38	60.13	-89.068
205	-19.357	-17.388	-18.616	23.144	-67.691	-71.72	-55.348	-131.86	-51.878	-120.99	209.16	16.704	-2.4899	6.6885	0.078017	15.642	-32.206	-639.09	-510.09	67.387	-51.699
205.5	-1.2195	-2.0757	-19921	25.245	-23327	-25057	-51.959	-117.17	-46.664	-107.94	242.44	17.518	-3.7222	18.125	0.41742	17.757	-36.07	2585.9	2287.2	75.797	-23.124
206	4.8039	2.585	-1893.4	28.671	-2209.3	-2458.2	-37.685	-105.46	-34.591	-90.192	295.94	21.011	-3.7069	26.777	-0.534	15.022	-30.214	1681.1	1671.4	79.901	-33.777
206.5	4.6965	-3.575	690.82	31.374	825.52	784.89	-24.075	-92.948	-21.365	-76.811	348.52	26.453	-1.685	29.771	-3.8662	7.8338	-27.7	-180.46	-261.82	80.39	-19.78
207	-2.0543	-16.871	567.92	30.715	692.5	635.19	-11.664	-99.273	-21.028	-81.121	348.07	32.045	3.9676	31.352	-6.0093	2.1847	-22.36	-8.791	-79.331	76.857	-6.1259
207.5	-10.63	-28.416	729.96	28.056	903.01	856.5	-3.3704	-108.54	-21.503	-88.969	297.62	27.825	8.1005	28.178	-8.7292	-4.2817	-19.421	30.732	-43.77	70.122	11.119
208	-4.5354	-18.141	1049.5	25.778	1344.1	1328.9	-0.7459	-112.64	-17.789	-94.483	270.53	28.037	11.39	31.178	-4.8963	-10.945	-28.05	35.429	-73.743	67.807	47.179
208.5	-2.2553	-9.2168	-1162.5	24.321	-1565	-1687	-3.0881	-116.52	-15.973	-93.09	270.33	27.351	11.514	30.607	0.20394	-15.188	-38.768	13.927	-145.07	67.14	52.961
209	-7.8058	-14.248	-1306.2	25.702	-1681.9	-1803.6	-9.8021	-101.28	-8.5292	-72.903	356.13	26.117	11.276	25.833	4.5248	-10.829	-40.389	-22.791	-211.65	64.576	39.258
209.5	-10.697	-21.624	1112.2	28.5	1600.4	1605.5	-20.225	-84.632	-5.1594	-54.733	579.96	30.793	13.457	22.416	7.6638	-3.5125	-33.138	-27.078	-213.07	63.078	13.294
210	-22.867	-42.73	1804.5	30.044	2737.4	2643.1	-25.922	-77.839	-9.2125	-46.675	786.95	29.682	14.604	17.788	7.3514	-2.5403	-24.401	-43.48	-263.53	61.98	2.2044
210.5	-27.138	-58.284	3155.7	30.114	4870.3	4704.3	-19.546	-78.303	-14.562	-53.518	784.18	29.191	15.724	18.477	10.816	5.8668	-8.9714	-109.78	-436.17	60.482	-4.4453
211	-25.191	-56.258	-485.91	28.403	-626.17	-665.75	-16.84	-91.057	-22.389	-76.82	551.91	31.006	15.058	21.921	10.165	10.13	-0.9761	-500.14	-1750.7	60.733	-7.7335
211.5	-29.433	-54.732	-4122.9	24.943	-6144	-5983.2	-16.629	-108.52	-31.923	-104.34	399.77	33.229	14.606	25.855	4.8561	7.1399	-1.7411	132.34	257.12	59.106	15.648
212	-33.476	-60.448	-2704	20.911	-3996.5	-3764.9	-20.276	-119.37	-34.985	-122.85	330.97	39.365	14.75	24.716	6.1925	10.017	-0.35269	275.13	642.33	55.931	37.868
212.5	-30.61	-61.238	-2130.1	18.429	-3098	-2766.7	-27.761	-115.97	-30.747	-114.62	331.05	41.62	13.94	20.206	8.5812	8.1496	-2.7686	545.17	1223.2	55.586	60.972
213	-26.218	-60.431	-1853.5	17.663	-2689.8	-2317.3	-32.375	-106.81	-26.208	-97.39	364.32	37.746	9.8346	15.555	9.8822	3.8984	-11.561	-5792.5	-9155.9	58.712	70.73
213.5	-20.127	-58.597	-1421	18.28	-2052.7	-1807.7	-35.844	-105	-23.956	-91.157	360.34	32.233	2.8386	13.017	12.757	-0.032452	-24.077	-2383.4	-3704.7	64.443	49.224
214	-16.835	-48.504	-1278.3	18.828	-1755.2	-1702.4	-34.721	-104.76	-19.561	-90.22	390.28	26.549	0.67102	16.413	11.272	-7.621	-34.421	-226.19	-216.29	67.37	14.826
214.5	-15.545	-41.277	-1093.5	20.329	-1475.8	-1560.1	-29.779	-99.382	-10.224	-88.954	451.35	24.875	4.0768	19.155	10.43	-15.256	-41.392	-168.32	-120.28	65.879	2.448
215	-11.13	-35.212	-992.24	23.498	-1293.9	-1502.3	-24.089	-93.028	-3.1722	-83.193	497.52	31.712	10.239	23.24	14.622	-19.107	-42.321	-120.19	-70.509	61.057	2.2373
215.5	-13.44	-33.698	-991.38	27.365	-1225.5	-1560	-16.534	-83.253	-1.1813	-74.792	703.93	36.146	18.544	27.379	17.098	-14.537	-32.325	-80.183	-42.104	55.937	2.1058
216	-24.005	-43.315	-760.04	31.065	-892.92	-1265.2	-16.165	-77.873	-4.6121	-68.482	912.26	38.339	22.876	27.859	16.92	-2.5821	-18.872	-68.746	-34.191	52.964	4.6542
216.5	-41.802	-57.744	-499.81	32.602	-573.93	-845.95	-26.753	-81.665	-14.877	-69.514	860.01	38.086	21.899	30.365	16.975	8.5106	-11.131	-228.36	-227.88	52.506	7.8385
217	-61.95	-71.437	-394.69	30.635	-471.6	-651.28	-28.011	-86.63	-26.427	-76.108	664.02	34.472	19.823	30.942	16.92	15.255	-4.6683	-12141	-12467	55.547	15.928
217.5	-65.224	-74.402	-350.68	27.09	-449.29	-538.97	-24.65	-96.051	-37.925	-86.007	466.2	29.47	17.65	23.771	18.885	17.26	-1.7721	-5687.3	-5835.9	59.453	23.467
218	-50.33	-66.158	-288.67	24.853	-395.55	-397.65	-17.42	-106.84	-46.303	-92.604	364.82	24.061	16.439	17.643	23.985	15.715	-0.61439	337.33	355.47	64.661	31.729
218.5	-30.918	-46.529	-293.16	24.234	-440.54	-368.26	-6.7921	-107.59	-42.667	-90.972	325.96	22.791	14.562	14.607	23.084	12.616	-4.2644	351.33	374.1	68.291	24.784
219	-15.93	-29.069	-277.15	25.806	-460.13	-337.87	-6.3827	-108.91	-39.366	-89.303	340.32	24.108	16.061	11.534	18.233	15.004	-8.4312	343.07	414.16	67.482	15.845
219.5	-5.8087	-19.365	-275.91	28.918	-502.84	-352.93	-12.838	-102.6	-31.305	-79.031	417.93	25.683	17.224	14.274	13.098	18.187	-8.036	769.89	1062.6	64.197	9.1356
220	2.1059	-9.7451	-347.18	30.847	-663.95	-485.85	-19.621	-96.409	-23.252	-70.04	545.57	27.736	14.401	17.076	10.024	19.233	-8.4355	-222.8	-287.69	59.823	8.4792
220.5	6.1122	-7.3989	-316.9	30.591	-624.09	-495.61	-29.114	-97.456	-19.858	-64.253	681.82	31.504	13.776	17.002	10.916	15.128	-8.8337	-112.97	-148.11	55.826	24.287
221	5.3852	-9.0042	-305.09	29.959	-566.57	-495.46	-33.499	-91.159	-12.719	-55.833	825.19	34.616	10.553	19.65	13.04	7.7095	-9.9176	-87.01	-115.1	55.387	33.042
221.5	2.4056	-9.4787	-296.45	28.812	-511.54	-492.54	-28.803	-88.601	-8.7356	-54.173	680.55	36.055	6.0651	20.596	11.835	6.2491	-9.9371	-64.292	-119.15	54.97	39.202
222	-3.9614	-12.928	-298.63	28.754	-475.41	-489.73	-22.209	-87.283	-6.3429	-56.873	552.72	34.208	3.7637	19.54	7.5379	5.92	-10.577	-125.86	-436.71	56.05	38.672
222.5	-12.117	-16.892	-393.16	29.835	-551.25	-583.45	-19.139	-84.663	-5.1809	-60.468	512.65	28.823	3.7112	14.931	4.1511	5.7835	-10.488	252.06	1106.7	58.376	29.175
223	-15.174	-21.816	-367.57	30.616	-492.46	-520.4	-19.297	-83.677	-9.0347	-64.231	449.01	24.903	4.3201	10.955	3.4475	9.933	-11.036	54.374	376.67	59.008	31.745
223.5	-18.099	-26.097	-310.65	30.972	-396.33	-412.48	-23.064	-78.813	-12.66	-66.285	404.44	23.046	3.9551	8.6326	8.2114	9.6688	-13.909	32.1	387.76	61.574	34.519
224	-13.54	-24.152	-276.04	30.746	-336.65	-342.51	-32.839	-72.089	-17.051	-64.351	337.32	25.523	4.9425	7.0503	11.946	7.6918	-15.728	16.323	558.31	64.001	28.756
224.5	-7.4734	-23.38	-267.82	29.38	-332.45	-348.84	-38.124	-65.415	-19.994	-60.271	324.97	29.523	7.2511	12.323	14.453	6.5126	-13.929	167.35	-1647.4	65.409	15.711
225	-4.0551	-19.537	-309.16	27.973	-394.55	-413.05	-40.696	-59.3	-16.175	-54.898	387.8	28.44	10.967	15.451	16.936	2.8782	-9.8863	41.131	-109.31	66.927	9.276
225.5	2.7221	-15.649	-301.91	27.8	-420.72	-423.46	-38.464	-55.094	-10.984	-46.456	708.89	29.742	17.852	17.184	17.219	-1.8646	-7.0066	33.532	-41.849	67.482	8.6512
226	4.1285	-17.912	-195.73	28.203	-325.44	-320.46	-29.885	-51.886	-3.9131	-40.752	-4064.9	30.794	21.917	16.322	16.275	-4.0954	-3.1619	30.069	-24.618	67.686	11.912
226.5	-0.20958	-18.318	-111.89	28.499	-201.06	-204.94	-25.382	-52.18	-0.6263	-40.767	-842.49	28.477	19.99	9.1169	12.391	0.41434	2.0111	33.844	-18.291	66.109	27.495
227	-3.668	-15.143	-71.419	27.975	-129.66	-130.02	-21.501	-52.127	-0.82226	-39.406	-522.92	27.912	15.88	4.1544	9.0869	3.6147	2.5075	30.29	-26.61	64.423	26.686
227.5	-7.1836	-12.853	-53.959	26.728	-95.372	-88.651	-18.185	-51.661	-3.6483	-40.923	-592.93	27.491	10.067	1.9339	6.7269	7.2705	1.5915	25.794	-44.999	62.049	21.515
228	-10.232	-11.476	-53.932	24.733	-88.952	-73.599	-14.258	-48.537	-5.8111	-40.232	-723.9	27.33	7.0102	5.4044	5.9837	12.684	2.8061	17.23	-66.791	57.903	25.92
228.5	-7.4542	-7.2148	-53.5	24.074	-96.993	-66.231	-5.9262	-39.282	-3.5472	-32.906	-442.74	29.775	11.463	14.42	8.9663	13.635	3.0242	-2.0758	-76.24	55.333	26.898
229	0.055058	0.29583	-44.166	24.764	-91.646	-58.738	0.95944	-31.192	-2.3276	-26.19	-268.49	30.846	15.103	18.836	12.097	14.147	5.7534	6.5338	-48.305	53.631	34.322
229.5	5.8492	6.0181	-32.812	25.157	-75.465	-51.066	3.0424	-23.893	0.0046086	-16.595	-154.42	29.721	17.014	22.06	13.932	16.355	10.577	17.847	-20.213	52.32	42.714
230	11.328	9.7868	-21.402	25.748	-55.649	-40.232	3.7521	-17.124	3.4638	-6.5747	-87.035	29.545	17.804	24.914	14.955	18.747	14.174	21.238	1.7993	51.622	46.324
230.5	14.226	11.652	-14.281	26.402	-39.346	-29.294	4.6252	-10.823	6.3614	0.71566	-54.464	28.83	16.526	25.302	14.756	20.929	16.104	21.23	18.875	51.855	43.712
231	15.561	11.889	-8.9725	26.528	-27.517	-20.887	7.9872	-5.7299	10.322	5.6088	-33.58	28.256	17.236	25.602	14.985	23.173	17.775	16.505	20.944	53.32	40.984
231.5	15.241	11.526	-4.3312	27.035	-18.609	-13.301	12.615	-1.2311	14.768	8.5881	-16.51	27.69	18.548	24.954	15.923	25.41	18.633	12.28	15.298	54.675	40.342
232	16.083	12.549	0.46329	27.631	-10.978	-6.5968	16.607	3.1799	17.44	10.426	-5.9672	27.193	18.883	23.559	16.872	25.796	18.942	15.223	11.473	55.83	39.342
232.5	18.112	14.5	5.9782	27.905	-4.5727	-2.2834	19.345	6.2821	19.904	12.3	2.0522	27.083	19.574	23.4	18.482	25.651	19.159	22.845	9.3452	56.131	42.831
233	18.857	14.529	9.8947	28.123	1.1192	1.7785	20.741	9.7114	22.087	14.691	9.7034	26.93	20.041	23.668	19.772	25.663	19.358	27.089	12.995	55.281	43.717
233.5	20.296	16.209	12.448	27.951	5.9869	5.9996	22.175	12.774	23.167	17.715	15.484	27.653	20.594	24.34	20.85	25.032	19.979	29.157	18.765	55.137	43.012
234	21.044	18.066	13.961	27.435	9.4299	9.674	23.508	14.943	23.881	20.615	20.211	28.331	21.632	25.027	21.756	24.783	20.615	27.511	22.201	55.641	42.901
234.5	22.544	19.979	15.262	26.822	11.264	12.815	25.059	16.83	24.747	23.192	23.191	28.558	22.442	25.282	22.267	25.392	21.687	25.635	24.691	56.081	42.481
235	24.609	23.17	16.765	26.106	12.964	14.975	26.433	18.113	25.492	25.263	25.647	28.61	22.902	25.497	22.668	26.2	22.93	27.127	26.492	57.049	42.962
235.5	25.825	24.605	18.088	25.557	14.295	16.312	27.604	19.284	26.214	26.575	28.161	28.256	23.005	25.555	22.888	26.878	23.794	29.041	27.92	57.488	43.262
236	26.511	25.082	18.865	25.201	15.213	17.19	28.671	20.659	26.89	27.853	30.227	27.867	22.768	25.699	23.382	27.473	24.581	30.501	28.366	57.371	44.925
236.5	26.633	25.374	19.524	25.008	16.323	18.095	29.198	21.833	27.116	29.005	31.641	27.91	22.459	26.064	23.81	27.64	24.7	30.864	28.059	56.97	46.455
237	26.504	25.184	20.085	24.889	17.103	19.195	29.485	22.696	26.966	29.496	32.261	28.069	22.325	26.518	24.229	27.639	24.557	30.87	27.595	56.778	47.854
237.5	26.304	25.309	20.605	24.737	17.874	20.314	29.543	23.328	26.823	29.888	32.713	28.179	22.4	26.741	24.56	27.795	24.593	30.83	27.545	56.812	49.225
238	25.938	25.666	21.218	24.534	18.859	21.441	29.548	23.591	26.81	30.093	33.227	28.21	22.927	26.833	24.821	27.945	24.657	30.811	27.948	56.588	49.055
238.5	25.376	25.643	21.539	24.326	19.694	21.981	30.063	24.019	26.96	30.417	33.831	27.973	23.328	26.811	24.988	28.221	24.87	30.945	28.218	56.73	48.224
239	25.043	25.665	21.706	24.104	20.309	22.189	30.685	24.478	27.239	31.018	34.454	27.744	23.503	26.697	24.979	28.577	25.051	31.049	28.488	56.743	47.441
239.5	24.951	25.647	21.779	23.842	20.65	22.156	30.979	24.887	27.513	31.489	34.783	27.618	23.678	26.761	24.899	28.854	25.201	31.39	28.49	56.868	46.834
240	24.869	25.599	21.696	23.583	20.746	21.969	31.036	25.375	27.727	31.825	34.755	27.336	23.657	26.758	24.595	28.999	25.219	31.688	28.177	57.115	46.589
240.5	25.082	25.682	21.412	23.361	20.524	21.816	30.778	25.707	27.849	31.959	34.728	27.087	23.726	26.66	24.417	28.906	25.122	31.588	28.404	57.103	47.026
241	25.287	25.723	21.263	23.187	20.27	21.784	30.537	25.885	27.957	32.042	34.686	26.888	23.852	26.566	24.317	28.672	25.159	31.458	28.583	57.082	47.479
241.5	25.331	25.754	21.166	23.083	20.075	21.863	30.57	25.999	27.992	32.068	34.742	26.716	23.856	26.475	24.197	28.399	25.124	31.144	28.578	56.861	48.056
242	25.474	25.79	21.119	23.032	19.921	21.897	30.66	26.174	27.982	32.261	34.714	26.642	23.773	26.445	24.25	28.213	25.114	30.739	28.698	56.704	48.376
242.5	25.339	25.626	21.084	22.872	19.869	21.8	30.69	26.351	27.928	32.424	34.421	26.676	23.656	26.434	24.288	28.219	25.217	30.224	28.399	56.648	48.421
243	25.017	25.368	20.924	22.701	19.847	21.631	30.658	26.617	27.992	32.571	34.253	26.702	23.501	26.428	24.294	28.305	25.231	29.664	28.096	56.522	48.45
243.5	24.754	25.173	20.725	22.546	19.805	21.442	30.553	26.968	28.209	32.807	34.05	26.743	23.414	26.349	24.376	28.418	25.267	29.173	28.083	56.458	47.942
244	24.549	24.903	20.582	22.396	19.757	21.345	30.357	27.193	28.419	32.952	34.092	26.863	23.376	26.24	24.394	28.519	25.216	28.906	28.146	56.375	47.398
244.5	24.521	24.675	20.405	22.329	19.641	21.235	30.111	27.317	28.606	33.107	34.376	26.88	23.368	26.155	24.342	28.497	25.104	28.793	28.168	56.358	46.95
245	24.582	24.516	20.23	22.299	19.511	21.072	29.861	27.382	28.736	33.263	34.496	26.776	23.36	26.102	24.33	28.45	25.055	28.574	28.23	56.301	46.135
245.5	24.577	24.341	20.11	22.259	19.409	20.932	29.661	27.431	28.784	33.428	34.627	26.642	23.337	26.059	24.331	28.432	25.031	28.347	28.222	56.268	45.611
246	24.428	24.139	20.032	22.223	19.342	20.876	29.56	27.524	28.844	33.59	34.647	26.499	23.38	26.04	24.388	28.386	25.061	28.164	28.215	56.27	45.517
246.5	24.119	23.91	20.04	22.216	19.312	20.907	29.483	27.606	28.926	33.696	34.455	26.454	23.438	26.08	24.513	28.382	25.131	28.167	28.246	56.248	45.402
247	23.701	23.646	20.089	22.228	19.281	20.997	29.419	27.736	28.917	33.774	34.204	26.51	23.483	26.117	24.583	28.36	25.151	28.116	28.237	56.289	45.556
247.5	23.302	23.394	20.099	22.265	19.227	21.043	29.316	27.8	28.818	33.795	33.991	26.546	23.501	26.139	24.609	28.354	25.142	27.982	28.284	56.23	45.85
248	23.001	23.295	20.048	22.316	19.158	20.974	29.13	27.78	28.743	33.768	33.881	26.518	23.524	26.163	24.642	28.427	25.175	27.873	28.358	56.18	45.866
248.5	22.822	23.309	19.914	22.333	19.074	20.879	28.968	27.785	28.712	33.747	33.879	26.37	23.503	26.111	24.625	28.477	25.257	27.686	28.333	56.117	45.605
249	22.729	23.315	19.728	22.322	18.961	20.734	28.79	27.762	28.679	33.75	33.889	26.157	23.43	26.011	24.595	28.589	25.366	27.457	28.224	56.104	45.318
249.5	22.705	23.333	19.536	22.305	18.849	20.584	28.627	27.826	28.738	33.744	33.819	26.016	23.4	25.991	24.603	28.689	25.487	27.307	28.034	56.181	44.961
250	22.693	23.302	19.406	22.323	18.768	20.442	28.544	27.854	28.767	33.763	33.691	25.972	23.411	25.981	24.586	28.703	25.538	27.244	27.839	56.235	44.69
250.5	22.717	23.142	19.375	22.369	18.688	20.293	28.481	27.837	28.708	33.802	33.603	26.038	23.465	26.016	24.64	28.707	25.452	27.372	27.745	56.14	44.699
251	22.748	23.016	19.393	22.44	18.632	20.165	28.367	27.827	28.659	33.857	33.512	26.166	23.568	26.081	24.768	28.621	25.317	27.541	27.722	56.01	44.845
251.5	22.753	22.875	19.424	22.502	18.599	20.046	28.222	27.754	28.628	33.899	33.398	26.219	23.621	26.076	24.838	28.508	25.176	27.52	27.681	55.915	44.984
252	22.689	22.793	19.338	22.515	18.518	19.917	28.015	27.738	28.608	33.848	33.186	26.177	23.605	26.039	24.895	28.493	25.104	27.367	27.688	55.773	45.054
252.5	22.559	22.821	19.214	22.538	18.452	19.842	27.801	27.71	28.606	33.769	32.947	26.048	23.562	25.955	24.856	28.516	25.086	27.159	27.718	55.787	44.836
253	22.5	22.863	19.072	22.561	18.401	19.778	27.694	27.645	28.647	33.652	32.859	25.835	23.503	25.835	24.747	28.614	25.093	27.062	27.795	55.854	44.458
253.5	22.489	22.963	18.967	22.603	18.343	19.73	27.599	27.576	28.71	33.553	32.864	25.686	23.46	25.719	24.691	28.67	25.092	27.087	27.795	55.89	44.056
254	22.45	22.927	18.914	22.666	18.265	19.698	27.568	27.501	28.714	33.467	32.913	25.616	23.374	25.598	24.576	28.573	25.019	26.986	27.811	55.878	43.623
254.5	22.352	22.806	18.883	22.718	18.21	19.663	27.572	27.485	28.706	33.37	32.963	25.56	23.252	25.521	24.444	28.44	24.941	26.738	27.776	55.826	43.373
255	22.218	22.711	18.884	22.778	18.192	19.685	27.547	27.503	28.678	33.289	32.933	25.515	23.162	25.468	24.329	28.246	24.902	26.606	27.652	55.741	43.252
255.5	22.047	22.598	18.873	22.822	18.167	19.731	27.515	27.491	28.606	33.241	32.862	25.428	23.059	25.399	24.255	28.054	24.856	26.572	27.508	55.79	43.19
256	21.985	22.557	18.879	22.833	18.161	19.764	27.434	27.494	28.536	33.252	32.855	25.319	22.962	25.356	24.241	27.924	24.812	26.566	27.228	56.003	43.317
256.5	22.005	22.537	18.87	22.839	18.119	19.763	27.291	27.482	28.424	33.267	32.754	25.257	22.888	25.305	24.262	27.827	24.772	26.576	27.001	56.166	43.512
257	22.009	22.464	18.797	22.824	18.008	19.664	27.162	27.444	28.266	33.213	32.619	25.175	22.795	25.224	24.266	27.747	24.648	26.46	26.91	56.241	43.521
257.5	22.001	22.343	18.673	22.796	17.909	19.519	27.143	27.417	28.099	33.088	32.486	25.089	22.694	25.154	24.188	27.69	24.574	26.419	26.913	56.225	43.382
258	21.96	22.244	18.534	22.792	17.807	19.395	27.183	27.303	27.972	32.931	32.262	24.977	22.599	25.038	24.076	27.634	24.572	26.496	27.015	56.175	43.135
258.5	21.896	22.17	18.391	22.769	17.732	19.283	27.216	27.197	27.932	32.828	32.128	24.858	22.526	24.899	23.97	27.575	24.568	26.538	27.078	56.193	42.901
259	21.782	22.056	18.303	22.703	17.719	19.238	27.201	27.131	27.939	32.791	32.061	24.804	22.462	24.82	23.882	27.519	24.561	26.605	26.948	56.14	42.773
259.5	21.739	22.076	18.249	22.658	17.721	19.25	27.116	27.016	27.899	32.765	31.949	24.738	22.46	24.754	23.835	27.455	24.499	26.561	26.803	56.069	42.777
260	21.707	22.139	18.215	22.598	17.763	19.266	26.929	26.928	27.803	32.715	31.837	24.674	22.478	24.69	23.816	27.408	24.381	26.577	26.702	56.007	42.745
260.5	21.649	22.169	18.239	22.541	17.815	19.292	26.757	26.815	27.673	32.58	31.704	24.593	22.46	24.623	23.773	27.339	24.265	26.7	26.658	55.934	42.604
261	21.665	22.278	18.289	22.508	17.829	19.292	26.606	26.694	27.554	32.41	31.594	24.536	22.429	24.515	23.757	27.26	24.174	26.716	26.732	55.903	42.526
261.5	21.619	22.288	18.27	22.463	17.843	19.235	26.507	26.632	27.49	32.25	31.528	24.507	22.327	24.415	23.737	27.194	24.074	26.685	26.873	55.887	42.528
262	21.57	22.247	18.216	22.404	17.833	19.144	26.516	26.576	27.444	32.087	31.521	24.488	22.171	24.344	23.711	27.138	24.006	26.635	26.951	55.781	42.62
262.5	21.528	22.237	18.118	22.311	17.79	19.064	26.531	26.472	27.386	31.996	31.536	24.456	22.062	24.273	23.701	27.083	23.939	26.616	26.935	55.58	42.629
263	21.433	22.197	18.019	22.219	17.731	19.011	26.534	26.408	27.339	31.961	31.411	24.389	21.981	24.185	23.636	27.013	23.896	26.614	26.971	55.388	42.45
263.5	21.318	22.131	18.005	22.111	17.673	19.01	26.514	26.382	27.234	31.941	31.266	24.265	21.94	24.091	23.534	26.881	23.896	26.57	26.973	55.17	42.187
264	21.196	22.065	18.029	21.988	17.652	19.06	26.485	26.349	27.16	31.886	31.145	24.132	21.913	24.021	23.438	26.719	23.902	26.477	26.989	55.07	41.951
264.5	21.146	22.011	18.08	21.876	17.686	19.11	26.424	26.325	27.116	31.794	31.037	23.977	21.847	23.988	23.338	26.586	23.9	26.363	27.1	55.068	41.995
265	21.17	21.964	18.152	21.752	17.728	19.123	26.347	26.2	27.027	31.644	31.013	23.846	21.787	23.95	23.202	26.494	23.858	26.282	27.102	55.083	42.201
265.5	21.273	21.962	18.2	21.641	17.748	19.129	26.242	26.02	26.986	31.468	30.975	23.733	21.693	23.885	23.084	26.501	23.763	26.223	27.083	55.028	42.361
266	21.403	22.011	18.22	21.555	17.712	19.101	26.158	25.886	26.909	31.317	30.878	23.642	21.653	23.805	23.005	26.512	23.635	26.147	26.977	54.94	42.252
266.5	21.51	22.119	18.194	21.478	17.596	19.095	26.139	25.784	26.783	31.168	30.748	23.615	21.641	23.679	22.956	26.397	23.515	26.113	26.978	54.853	41.956
267	21.544	22.193	18.135	21.39	17.5	19.137	26.057	25.754	26.648	31.098	30.645	23.649	21.616	23.597	22.957	26.252	23.394	26.088	26.902	54.846	41.74
267.5	21.514	22.21	18.09	21.275	17.429	19.148	25.963	25.766	26.525	31.079	30.569	23.715	21.617	23.553	22.95	26.077	23.297	26.16	26.723	54.844	41.635
268	21.466	22.201	18.05	21.155	17.391	19.137	25.805	25.794	26.424	31.132	30.505	23.754	21.596	23.514	22.918	25.908	23.192	26.342	26.708	54.81	41.778
268.5	21.41	22.227	18.004	21.088	17.411	19.063	25.663	25.773	26.348	31.131	30.42	23.759	21.533	23.482	22.893	25.856	23.097	26.368	26.586	54.676	41.77
269	21.413	22.289	17.965	21.015	17.459	18.981	25.613	25.687	26.302	31.046	30.299	23.68	21.446	23.424	22.885	25.828	23.026	26.434	26.622	54.574	41.518
269.5	21.416	22.384	17.903	20.938	17.508	18.918	25.58	25.59	26.242	30.952	30.241	23.564	21.317	23.336	22.885	25.769	22.97	26.446	26.762	54.498	41.292
270	21.38	22.418	17.891	20.858	17.585	18.921	25.614	25.449	26.191	30.8	30.205	23.454	21.198	23.219	22.845	25.704	22.952	26.376	26.838	54.419	41.18
270.5	21.354	22.35	17.93	20.742	17.652	18.945	25.622	25.32	26.158	30.673	30.216	23.33	21.159	23.131	22.798	25.651	22.95	26.476	26.917	54.482	41.135
271	21.341	22.268	17.945	20.647	17.683	18.993	25.609	25.224	26.088	30.53	30.194	23.199	21.128	23.062	22.749	25.594	22.916	26.547	27.052	54.462	41.098
271.5	21.377	22.202	17.986	20.568	17.704	19.086	25.579	25.154	26.055	30.402	30.095	23.111	21.117	23.018	22.702	25.549	22.853	26.632	27.265	54.387	41.085
272	21.47	22.139	18.025	20.477	17.717	19.142	25.472	25.088	26.027	30.312	30.001	23.062	21.094	23.002	22.68	25.49	22.825	26.76	27.432	54.452	41.103
272.5	21.561	22.155	18.047	20.356	17.717	19.176	25.399	25.017	25.969	30.299	29.922	23.072	21.041	22.934	22.651	25.419	22.786	26.844	27.527	54.466	41.205
273	21.603	22.226	18.072	20.222	17.694	19.152	25.361	24.932	25.92	30.322	29.917	23.097	20.951	22.869	22.584	25.339	22.727	26.856	27.481	54.376	41.322
273.5	21.616	22.299	18.068	20.087	17.65	19.075	25.314	24.833	25.829	30.277	29.907	23.139	20.927	22.852	22.533	25.287	22.673	26.642	27.28	54.232	41.428
274	21.62	22.426	17.982	19.967	17.586	18.989	25.323	24.796	25.801	30.217	29.837	23.152	20.905	22.822	22.484	25.234	22.566	26.587	27.129	53.954	41.39
274.5	21.581	22.507	17.893	19.862	17.544	18.906	25.328	24.779	25.782	30.072	29.735	23.082	20.861	22.762	22.438	25.147	22.457	26.66	27.085	53.74	41.363
275	21.608	22.569	17.823	19.761	17.525	18.867	25.277	24.755	25.712	29.913	29.553	23	20.848	22.65	22.443	25.05	22.392	26.716	27.114	53.72	41.271
275.5	21.731	22.628	17.822	19.662	17.514	18.84	25.228	24.669	25.61	29.823	29.416	22.928	20.762	22.513	22.448	24.97	22.346	26.797	27.182	53.851	40.976
276	21.824	22.626	17.892	19.553	17.496	18.825	25.174	24.534	25.47	29.752	29.371	22.848	20.654	22.418	22.402	24.911	22.311	26.698	27.258	53.867	40.855
276.5	21.906	22.61	17.926	19.43	17.496	18.831	25.144	24.42	25.327	29.735	29.311	22.809	20.604	22.391	22.372	24.889	22.303	26.505	27.366	53.763	40.915
277	21.913	22.637	17.931	19.303	17.535	18.826	25.143	24.296	25.244	29.716	29.238	22.778	20.589	22.398	22.32	24.893	22.302	26.437	27.41	53.554	41.002
277.5	21.795	22.621	17.888	19.153	17.609	18.884	25.116	24.208	25.248	29.669	29.158	22.657	20.576	22.342	22.215	24.89	22.31	26.511	27.344	53.272	41.058
278	21.721	22.602	17.819	19.024	17.649	18.98	25.062	24.154	25.256	29.556	29.078	22.555	20.539	22.245	22.172	24.838	22.279	26.583	27.222	53.033	41.015
278.5	21.703	22.579	17.788	18.931	17.643	19.083	25.013	24.091	25.273	29.421	29.074	22.5	20.428	22.144	22.091	24.726	22.211	26.832	27.12	52.843	40.869
279	21.649	22.489	17.768	18.877	17.582	19.154	24.967	24.065	25.261	29.352	29.189	22.442	20.296	22.083	22.032	24.611	22.094	27.11	27.048	52.659	40.859
279.5	21.62	22.429	17.739	18.857	17.47	19.102	24.887	24.047	25.172	29.307	29.277	22.445	20.196	22.059	21.99	24.498	21.974	27.218	27.062	52.531	40.85
280	21.598	22.439	17.716	18.822	17.379	19.026	24.773	24.021	25.082	29.273	29.301	22.437	20.161	22.034	21.942	24.412	21.876	27.147	27.109	52.465	40.625
280.5	21.599	22.466	17.695	18.761	17.329	18.934	24.631	23.997	25.014	29.21	29.229	22.4	20.184	22.06	21.98	24.32	21.783	26.911	27.138	52.42	40.244
281	21.597	22.484	17.673	18.676	17.336	18.9	24.483	23.915	24.941	29.097	29.083	22.403	20.186	22.07	22.044	24.213	21.754	26.693	27.271	52.353	39.975
281.5	21.521	22.506	17.628	18.594	17.344	18.878	24.434	23.824	24.895	29.001	28.925	22.393	20.18	22.069	22.102	24.111	21.702	26.782	27.516	52.283	39.96
282	21.458	22.49	17.554	18.526	17.311	18.806	24.433	23.709	24.81	28.877	28.713	22.367	20.17	22.093	22.117	24.045	21.684	27.033	27.746	52.082	40.216
282.5	21.32	22.41	17.483	18.485	17.263	18.732	24.458	23.544	24.727	28.755	28.542	22.305	20.138	22.012	22.035	24.036	21.72	27.205	27.891	51.856	40.508
283	21.412	22.473	17.432	18.443	17.21	18.692	24.488	23.444	24.715	28.684	28.396	22.243	20.137	21.88	21.935	24.064	21.705	27.338	27.789	51.846	40.551
283.5	21.59	22.588	17.397	18.376	17.179	18.685	24.441	23.367	24.653	28.607	28.328	22.163	20.14	21.766	21.829	24.054	21.68	27.281	27.57	51.821	40.358
284	21.621	22.631	17.403	18.28	17.225	18.738	24.353	23.285	24.561	28.556	28.335	22.136	20.088	21.644	21.746	24.033	21.601	27.158	27.386	51.771	39.975
284.5	21.657	22.642	17.456	18.155	17.248	18.777	24.204	23.274	24.473	28.586	28.335	22.14	20.021	21.546	21.691	23.994	21.496	26.965	27.194	51.811	39.845
285	21.543	22.445	17.527	18.052	17.236	18.756	24.05	23.26	24.305	28.488	28.338	22.106	19.931	21.501	21.634	23.901	21.405	26.813	27.153	51.707	39.832
285.5	21.392	22.215	17.572	17.994	17.209	18.725	23.906	23.223	24.184	28.303	28.306	22.067	19.855	21.46	21.61	23.819	21.356	26.691	27.127	51.514	39.905
286	21.311	22.115	17.549	17.979	17.133	18.691	23.774	23.201	24.169	28.165	28.265	21.996	19.79	21.395	21.573	23.761	21.376	26.577	26.977	51.356	39.97
286.5	21.155	22.06	17.479	17.963	17.045	18.607	23.716	23.179	24.117	28.043	28.208	21.943	19.774	21.402	21.534	23.69	21.401	26.541	26.8	51.089	39.99
287	20.984	22.031	17.408	17.929	16.967	18.539	23.718	23.131	24.107	27.916	28.09	21.914	19.781	21.389	21.475	23.645	21.45	26.36	26.739	50.864	39.891
287.5	20.871	21.959	17.33	17.895	16.889	18.473	23.72	23.056	24.1	27.865	27.917	21.869	19.757	21.377	21.406	23.564	21.477	26.234	26.741	50.787	39.731
288	20.807	21.794	17.209	17.881	16.836	18.399	23.674	22.99	23.998	27.771	27.737	21.875	19.738	21.391	21.362	23.453	21.395	26.224	26.731	50.643	39.65
288.5	20.779	21.623	17.098	17.891	16.813	18.34	23.546	22.903	23.939	27.662	27.581	21.814	19.632	21.29	21.27	23.404	21.287	26.336	26.672	50.527	39.523
289	20.747	21.415	17.005	17.921	16.798	18.271	23.345	22.814	23.904	27.663	27.502	21.717	19.52	21.196	21.181	23.348	21.187	26.486	26.524	50.386	39.497
289.5	20.655	21.214	16.952	17.935	16.781	18.176	23.185	22.801	23.88	27.69	27.479	21.701	19.484	21.147	21.148	23.369	21.122	26.49	26.534	50.228	39.679
290	20.51	21.065	16.975	17.955	16.751	18.069	23.059	22.799	23.908	27.747	27.525	21.696	19.509	21.169	21.186	23.426	21.147	26.39	26.713	50.23	39.936
290.5	20.328	20.95	16.985	18.004	16.674	17.971	22.934	22.803	23.876	27.767	27.571	21.707	19.61	21.254	21.271	23.458	21.215	26.382	27.01	50.183	40.306
291	20.11	20.878	16.98	18.095	16.563	17.911	22.873	22.811	23.813	27.741	27.599	21.739	19.66	21.301	21.301	23.484	21.263	26.417	27.103	50.104	40.52
291.5	20.005	20.868	16.991	18.272	16.48	17.876	22.78	22.785	23.783	27.738	27.623	21.77	19.646	21.284	21.279	23.44	21.248	26.511	26.958	50.075	40.441
292	20.018	20.826	16.993	18.428	16.421	17.832	22.657	22.78	23.794	27.721	27.652	21.759	19.628	21.22	21.227	23.432	21.251	26.69	26.823	50.059	40.234
292.5	20.181	20.777	16.983	18.531	16.39	17.789	22.575	22.812	23.881	27.731	27.746	21.79	19.618	21.155	21.216	23.488	21.244	26.723	26.791	50.108	39.908
293	20.297	20.676	16.957	18.561	16.359	17.716	22.461	22.875	24.013	27.754	27.876	21.847	19.584	21.146	21.262	23.568	21.23	26.843	26.97	50.112	39.684
293.5	20.315	20.549	16.973	18.564	16.286	17.609	22.343	22.98	24.097	27.738	27.94	21.854	19.538	21.175	21.304	23.653	21.2	26.899	27.14	50.041	39.597
294	20.183	20.432	17.018	18.599	16.198	17.523	22.271	23.074	24.159	27.797	27.979	21.886	19.502	21.238	21.31	23.672	21.127	26.799	27.256	49.874	39.482
294.5	19.94	20.378	17.072	18.694	16.114	17.48	22.193	23.134	24.184	27.904	27.934	21.929	19.472	21.334	21.318	23.641	21.059	26.707	27.262	49.663	39.4
295	19.769	20.438	17.082	18.799	16.103	17.452	22.157	23.147	24.168	27.993	27.859	21.967	19.54	21.399	21.374	23.693	21.09	26.688	27.232	49.478	39.385
295.5	19.664	20.426	17.063	18.898	16.114	17.46	22.137	23.067	24.111	27.982	27.808	21.995	19.614	21.43	21.415	23.729	21.164	26.661	27.217	49.339	39.436
296	19.649	20.441	17.009	18.976	16.095	17.468	22.158	22.951	24.035	27.863	27.712	22.031	19.661	21.45	21.456	23.749	21.247	26.574	27.088	49.281	39.523
296.5	19.772	20.457	16.955	18.986	16.026	17.439	22.194	22.882	24.01	27.72	27.643	22.023	19.71	21.458	21.424	23.757	21.275	26.445	26.93	49.226	39.561
297	20.016	20.534	17.002	18.981	15.901	17.44	22.223	22.875	24.035	27.668	27.642	21.945	19.741	21.458	21.362	23.701	21.26	26.356	26.847	49.189	39.427
297.5	20.249	20.635	17.093	18.95	15.749	17.456	22.235	22.893	24.115	27.732	27.704	21.92	19.768	21.482	21.355	23.69	21.234	26.384	26.691	49.151	39.136
298	20.363	20.616	17.165	18.903	15.659	17.468	22.192	22.899	24.179	27.783	27.795	21.873	19.709	21.449	21.29	23.685	21.187	26.35	26.576	49.091	38.868
298.5	20.311	20.582	17.227	18.883	15.698	17.467	22.116	22.894	24.19	27.792	27.862	21.854	19.62	21.384	21.281	23.66	21.149	26.295	26.58	49.089	38.713
299	20.146	20.444	17.225	18.878	15.788	17.43	21.992	22.854	24.151	27.7	27.858	21.91	19.531	21.334	21.31	23.655	21.094	25.978	26.482	49.076	38.729
299.5	19.953	20.323	17.127	18.875	15.888	17.326	21.926	22.791	24.087	27.575	27.79	21.946	19.461	21.328	21.32	23.644	21.067	25.731	26.55	49.03	38.91
300	19.846	20.382	17.111	18.905	15.93	17.292	21.838	22.713	24.049	27.502	27.724	21.945	19.478	21.351	21.391	23.601	21.029	25.819	26.779	48.954	39.093
300.5	19.804	20.405	17.113	18.921	15.902	17.304	21.767	22.639	23.977	27.433	27.66	21.931	19.483	21.35	21.41	23.556	20.98	25.948	26.935	48.78	39.188
301	19.798	20.394	17.094	18.915	15.872	17.313	21.753	22.609	23.959	27.392	27.574	21.873	19.528	21.349	21.381	23.494	20.914	26.096	27.001	48.551	39.007
301.5	19.826	20.334	17.078	18.878	15.86	17.347	21.708	22.596	23.936	27.345	27.479	21.753	19.538	21.316	21.262	23.427	20.85	26.191	27.027	48.429	38.842
302	19.785	20.186	16.995	18.823	15.806	17.33	21.653	22.596	23.842	27.258	27.402	21.653	19.501	21.272	21.13	23.426	20.852	26.208	27.091	48.328	38.754
302.5	19.797	20.13	16.88	18.745	15.774	17.299	21.548	22.535	23.792	27.165	27.293	21.577	19.471	21.218	21.043	23.374	20.884	26.219	27.107	48.342	38.536
303	19.807	20.131	16.795	18.628	15.768	17.306	21.414	22.433	23.647	27.06	27.18	21.51	19.373	21.12	21.008	23.294	20.901	26.364	27.171	48.464	38.559
303.5	19.823	20.134	16.787	18.551	15.769	17.282	21.326	22.361	23.526	26.976	27.065	21.526	19.303	21.069	21.034	23.246	20.866	26.397	26.965	48.425	38.509
304	19.954	20.172	16.827	18.5	15.758	17.261	21.325	22.297	23.505	26.963	26.964	21.621	19.31	21.123	21.091	23.212	20.797	26.343	26.706	48.335	38.385
304.5	19.995	20.131	16.883	18.482	15.731	17.254	21.392	22.244	23.435	26.98	26.945	21.741	19.326	21.209	21.142	23.229	20.73	26.432	26.65	48.15	38.503
305	20.049	20.187	16.892	18.522	15.631	17.219	21.48	22.226	23.454	26.973	26.968	21.77	19.386	21.248	21.128	23.255	20.697	26.519	26.71	47.837	38.538
305.5	20.076	20.219	16.853	18.53	15.593	17.214	21.514	22.232	23.491	26.896	27.053	21.738	19.45	21.213	21.133	23.22	20.703	26.469	26.94	47.629	38.314
306	19.999	20.172	16.81	18.51	15.63	17.24	21.458	22.187	23.446	26.787	27.065	21.632	19.453	21.124	21.1	23.126	20.654	26.408	27.198	47.429	38.037
306.5	19.966	20.179	16.79	18.469	15.723	17.254	21.374	22.164	23.424	26.708	27.003	21.507	19.417	21.011	21.054	23.079	20.598	26.285	27.274	47.33	37.779
307	19.942	20.177	16.794	18.429	15.78	17.252	21.259	22.123	23.374	26.67	26.955	21.443	19.331	20.956	21.077	23.052	20.56	26.07	27.231	47.365	37.521
307.5	19.974	20.231	16.815	18.388	15.773	17.208	21.172	22.023	23.274	26.676	26.89	21.394	19.203	20.862	21.089	23.043	20.516	26.036	27.143	47.328	37.593
308	20.061	20.332	16.785	18.337	15.705	17.102	21.168	21.963	23.211	26.631	26.868	21.357	19.126	20.803	21.08	23.01	20.512	25.977	27.036	47.162	37.76
308.5	20.036	20.335	16.705	18.282	15.555	17.006	21.132	21.867	23.147	26.564	26.853	21.397	19.089	20.831	21.047	22.881	20.424	25.895	26.978	47.011	37.916
309	19.894	20.261	16.664	18.226	15.436	16.99	21.131	21.79	23.036	26.496	26.765	21.428	19.057	20.835	20.952	22.771	20.325	26.024	27.1	46.923	38.103
309.5	19.713	20.116	16.665	18.172	15.367	17.057	21.111	21.756	23.009	26.407	26.674	21.395	19.04	20.831	20.87	22.682	20.215	26.219	27.254	46.809	38.137
310	19.651	20.011	16.71	18.146	15.391	17.082	21.081	21.708	22.997	26.356	26.637	21.293	19.033	20.798	20.791	22.62	20.113	26.314	27.117	46.757	38.034
310.5	19.695	20.006	16.782	18.121	15.457	17.085	21.108	21.68	23.018	26.339	26.655	21.166	19.006	20.754	20.715	22.594	20.058	26.323	26.97	46.603	38.011
311	19.784	19.979	16.801	18.092	15.538	17.03	21.059	21.659	23.063	26.364	26.681	21.092	18.946	20.725	20.685	22.574	20.005	26.149	26.688	46.381	38.04
311.5	19.835	19.968	16.703	18.054	15.597	16.922	20.926	21.602	23.048	26.364	26.693	21.064	18.853	20.69	20.595	22.576	20	26.044	26.51	46.28	38.067
312	19.764	19.976	16.619	18.022	15.593	16.87	20.8	21.553	23.003	26.326	26.631	21.024	18.754	20.59	20.534	22.607	20.041	25.937	26.457	46.27	38.099
312.5	19.674	20.003	16.519	18.005	15.525	16.829	20.639	21.504	22.927	26.209	26.542	20.951	18.709	20.433	20.47	22.657	20.07	25.799	26.278	46.297	37.991
313	19.629	20.095	16.479	18.011	15.45	16.838	20.538	21.425	22.85	26.063	26.444	20.894	18.713	20.302	20.41	22.603	20.037	25.675	26.298	46.454	37.781
313.5	19.628	20.112	16.536	18.014	15.438	16.929	20.573	21.373	22.804	25.941	26.353	20.908	18.773	20.214	20.432	22.528	19.971	25.535	26.311	46.557	37.644
314	19.611	20.065	16.559	18.008	15.457	17.028	20.62	21.288	22.755	25.894	26.267	21.005	18.804	20.191	20.492	22.473	19.902	25.483	26.323	46.507	37.53
314.5	19.572	20.044	16.542	17.987	15.521	17.132	20.604	21.203	22.652	25.88	26.202	21.042	18.786	20.185	20.529	22.372	19.869	25.56	26.385	46.37	37.457
315	19.598	20.065	16.469	17.971	15.507	17.137	20.549	21.137	22.519	25.862	26.228	20.996	18.748	20.146	20.504	22.337	19.845	25.548	26.2	46.143	37.351
315.5	19.627	20.105	16.388	17.945	15.453	17.079	20.459	21.142	22.382	25.829	26.303	20.915	18.656	20.129	20.442	22.282	19.834	25.472	26.106	45.978	37.127
316	19.61	20.046	16.385	17.896	15.416	16.995	20.353	21.167	22.271	25.689	26.394	20.805	18.544	20.084	20.345	22.182	19.784	25.528	26.071	45.976	36.931
316.5	19.535	20.012	16.502	17.819	15.371	16.875	20.343	21.186	22.302	25.573	26.452	20.751	18.43	20.063	20.303	22.145	19.73	25.584	26.215	45.959	36.864
317	19.379	19.946	16.59	17.757	15.369	16.783	20.34	21.183	22.339	25.501	26.349	20.744	18.323	20.067	20.345	22.145	19.735	25.561	26.353	45.805	36.89
317.5	19.292	19.888	16.631	17.729	15.385	16.693	20.305	21.134	22.385	25.501	26.171	20.738	18.251	20.071	20.415	22.194	19.713	25.648	26.454	45.694	36.829
318	19.3	19.895	16.545	17.743	15.344	16.63	20.285	21.005	22.396	25.573	25.995	20.691	18.18	20.046	20.403	22.22	19.641	25.619	26.543	45.37	36.762
318.5	19.416	19.807	16.497	17.748	15.312	16.657	20.26	20.91	22.353	25.629	25.921	20.688	18.194	20.067	20.347	22.19	19.56	25.512	26.426	45.178	36.675
319	19.596	19.767	16.506	17.737	15.255	16.685	20.213	20.882	22.3	25.64	25.915	20.734	18.282	20.121	20.252	22.107	19.456	25.365	26.114	45.098	36.766
319.5	19.733	19.767	16.557	17.675	15.217	16.717	20.176	20.837	22.173	25.584	25.92	20.738	18.334	20.127	20.121	21.992	19.38	25.125	25.841	45.015	37.163
320	19.782	19.777	16.604	17.617	15.163	16.737	20.171	20.899	22.123	25.504	25.936	20.713	18.36	20.101	20.059	21.945	19.408	25.055	25.544	45.105	37.339
320.5	19.744	19.932	16.576	17.566	15.112	16.747	20.191	20.9	22.084	25.43	25.823	20.686	18.347	20.088	20.054	21.941	19.401	25.013	25.481	45.041	37.491
321	19.576	20.015	16.53	17.514	15.085	16.77	20.252	20.815	22.092	25.325	25.72	20.611	18.293	20.044	20.062	21.928	19.427	24.978	25.48	44.918	37.343
321.5	19.443	19.977	16.537	17.485	15.053	16.761	20.265	20.753	22.174	25.249	25.691	20.61	18.276	20.012	20.139	21.902	19.455	24.86	25.491	44.767	36.895
322	19.319	19.86	16.549	17.471	15.06	16.745	20.16	20.629	22.189	25.157	25.684	20.623	18.264	19.996	20.192	21.877	19.457	24.718	25.48	44.51	36.326
322.5	19.315	19.701	16.556	17.47	15.054	16.671	20.034	20.557	22.161	25.026	25.699	20.548	18.179	19.873	20.127	21.786	19.411	24.766	25.34	44.358	35.722
323	19.38	19.679	16.484	17.434	15.033	16.617	19.913	20.56	22.105	24.964	25.689	20.439	18.084	19.777	20	21.658	19.236	25.012	25.321	44.313	35.477
323.5	19.478	19.764	16.404	17.378	15.019	16.591	19.823	20.534	21.977	24.884	25.617	20.378	18.073	19.73	19.852	21.558	19.088	25.139	25.421	44.343	35.461
324	19.579	19.877	16.343	17.311	14.992	16.545	19.793	20.525	21.913	24.834	25.561	20.362	18.086	19.678	19.734	21.485	19.019	25.122	25.392	44.38	35.494
324.5	19.599	19.93	16.363	17.289	15.057	16.6	19.78	20.473	21.9	24.894	25.539	20.359	18.135	19.685	19.725	21.51	19.076	24.893	25.385	44.271	35.432
325	19.541	19.926	16.368	17.294	15.125	16.63	19.734	20.361	21.863	24.918	25.461	20.364	18.095	19.656	19.727	21.559	19.16	24.688	25.384	44.088	35.478
325.5	19.49	19.89	16.38	17.318	15.17	16.631	19.736	20.263	21.827	24.969	25.323	20.328	17.94	19.624	19.716	21.588	19.164	24.648	25.511	43.969	35.48
326	19.467	19.861	16.376	17.281	15.152	16.673	19.755	20.195	21.715	24.974	25.238	20.302	17.853	19.659	19.726	21.565	19.036	24.924	26.074	44.027	35.516
326.5	19.49	19.901	16.386	17.216	15.048	16.713	19.759	20.18	21.618	24.921	25.223	20.304	17.828	19.65	19.759	21.562	18.946	25.091	26.314	44.145	35.487
327	19.545	19.969	16.413	17.159	14.959	16.743	19.777	20.195	21.559	24.813	25.257	20.284	17.861	19.654	19.78	21.552	18.957	25.013	26.281	44.132	35.195
327.5	19.524	20.026	16.358	17.1	14.899	16.712	19.756	20.207	21.581	24.693	25.34	20.194	17.885	19.601	19.794	21.518	18.996	24.745	25.938	43.956	34.955
328	19.423	20.092	16.327	17.054	14.868	16.643	19.745	20.11	21.603	24.576	25.317	20.154	17.843	19.521	19.763	21.487	19.005	24.281	25.275	43.692	34.919
328.5	19.31	19.987	16.258	17.028	14.857	16.524	19.709	19.976	21.613	24.433	25.248	20.133	17.782	19.484	19.752	21.432	19.002	24.284	25.085	43.491	34.872
329	19.258	19.841	16.145	17.003	14.816	16.416	19.656	19.901	21.646	24.346	25.183	20.137	17.774	19.442	19.768	21.379	18.961	24.502	24.868	43.412	34.868
329.5	19.336	19.772	16.102	16.992	14.783	16.369	19.604	19.845	21.616	24.244	25.04	20.117	17.775	19.42	19.747	21.292	18.944	24.571	24.622	43.26	34.996
330	19.46	19.62	16.08	16.986	14.766	16.347	19.551	19.827	21.538	24.188	24.984	20.043	17.759	19.37	19.69	21.239	18.987	24.596	24.416	43.066	35.04
330.5	19.519	19.602	16.143	16.953	14.779	16.402	19.529	19.817	21.4	24.135	24.975	20.024	17.767	19.327	19.617	21.245	18.999	24.501	24.143	42.916	35.079
331	19.484	19.604	16.22	16.92	14.829	16.464	19.531	19.758	21.276	24.073	24.998	20.057	17.806	19.329	19.595	21.262	18.978	24.527	24.202	42.898	35.055
331.5	19.475	19.588	16.227	16.909	14.919	16.492	19.516	19.725	21.233	24.02	25.064	20.104	17.776	19.337	19.613	21.271	18.97	24.699	24.208	42.994	34.795
332	19.438	19.644	16.144	16.903	15.004	16.455	19.466	19.728	21.257	23.954	25.113	20.11	17.752	19.301	19.699	21.213	18.929	24.883	24.199	42.994	34.521
332.5	19.473	19.691	16.039	16.888	15.011	16.325	19.413	19.712	21.323	23.936	25.19	20.049	17.685	19.231	19.681	21.056	18.877	24.771	24.096	42.808	34.402
333	19.502	19.698	15.998	16.865	15.018	16.228	19.349	19.707	21.336	23.927	25.239	19.971	17.575	19.151	19.578	20.947	18.831	24.44	23.9	42.583	34.329
333.5	19.378	19.669	15.993	16.816	15.007	16.163	19.301	19.697	21.281	23.92	25.243	19.96	17.557	19.101	19.49	20.918	18.774	24.344	24.011	42.539	34.429
334	19.328	19.688	16.064	16.78	15.006	16.146	19.251	19.637	21.281	23.891	25.17	19.977	17.495	19.116	19.402	20.962	18.766	24.299	24.317	42.628	34.463
334.5	19.177	19.691	16.095	16.756	14.977	16.144	19.186	19.573	21.275	23.84	25.008	19.963	17.474	19.127	19.356	21.034	18.813	24.355	24.541	42.614	34.341
335	19.106	19.697	16.08	16.74	14.877	16.11	19.153	19.525	21.204	23.819	24.852	19.908	17.475	19.098	19.389	21.068	18.833	24.552	24.737	42.604	34.21
335.5	19.2	19.787	16.203	16.733	14.851	16.109	19.241	19.588	21.198	23.789	24.709	19.827	17.441	19.032	19.429	21.085	18.783	24.64	24.738	42.483	33.984
336	19.273	19.789	16.37	16.726	14.895	16.178	19.32	19.695	21.083	23.752	24.565	19.712	17.397	18.914	19.431	21.032	18.673	24.63	24.751	42.469	33.756
336.5	19.333	19.758	16.563	16.701	14.978	16.334	19.364	19.771	20.984	23.673	24.466	19.639	17.312	18.827	19.448	20.95	18.568	24.601	24.66	42.554	33.527
337	19.345	19.754	16.576	16.611	15.011	16.477	19.358	19.798	21.005	23.644	24.394	19.616	17.246	18.811	19.428	20.794	18.511	24.402	24.442	42.447	33.446
337.5	19.329	19.688	16.476	16.534	14.947	16.542	19.261	19.702	21.007	23.602	24.427	19.56	17.193	18.79	19.426	20.666	18.536	23.989	24.119	42.406	33.453
338	19.285	19.795	16.299	16.469	14.845	16.523	19.154	19.55	21.055	23.58	24.482	19.487	17.116	18.772	19.364	20.603	18.553	23.568	23.473	42.364	33.771
338.5	19.236	19.929	16.215	16.46	14.817	16.412	19.11	19.504	21.126	23.569	24.533	19.381	17.074	18.707	19.311	20.565	18.509	23.503	23.351	42.339	34.022
339	19.133	19.923	16.238	16.461	14.841	16.344	19.075	19.404	21.118	23.475	24.533	19.259	17.089	18.659	19.257	20.589	18.472	23.669	23.634	42.422	34.142
339.5	18.988	19.868	16.287	16.458	14.883	16.317	19.066	19.319	21.123	23.395	24.419	19.231	17.168	18.664	19.179	20.541	18.346	23.961	24.107	42.439	34.203
340	18.964	19.774	16.284	16.455	14.863	16.279	19.084	19.233	21.135	23.369	24.257	19.302	17.262	18.661	19.182	20.585	18.253	24.473	24.813	42.311	34.129
340.5	19.01	19.816	16.23	16.459	14.783	16.202	19.034	19.087	21.029	23.341	24.132	19.413	17.244	18.643	19.184	20.691	18.219	24.75	25.203	42.166	34.162
341	19.119	19.939	16.15	16.467	14.652	16.078	18.995	18.989	20.917	23.294	24.071	19.477	17.158	18.554	19.12	20.755	18.278	24.748	25.24	42.026	34.233
341.5	19.224	19.894	16.111	16.449	14.564	16.002	18.98	18.957	20.849	23.331	24.187	19.478	17.027	18.484	19.067	20.792	18.383	24.664	25.166	41.97	34.13
342	19.406	19.774	16.109	16.43	14.528	15.99	19.006	18.938	20.809	23.356	24.284	19.505	16.96	18.498	19.053	20.722	18.439	24.629	24.947	41.963	34.021
342.5	19.604	19.655	16.071	16.426	14.556	15.977	19.048	18.988	20.886	23.377	24.328	19.51	17.003	18.574	19.119	20.58	18.389	24.929	24.713	42.048	33.939
343	19.724	19.579	15.971	16.455	14.562	15.993	19.089	19.012	20.988	23.422	24.288	19.575	17.108	18.699	19.228	20.523	18.339	25.06	24.67	42.162	33.817
343.5	19.756	19.587	15.908	16.465	14.521	16.026	19.068	19.025	21.009	23.368	24.248	19.615	17.196	18.762	19.231	20.518	18.308	25.007	24.542	42.256	33.742
344	19.589	19.621	15.855	16.444	14.416	16.055	18.964	19.079	21.106	23.379	24.349	19.627	17.215	18.754	19.186	20.528	18.291	24.628	24.392	42.316	33.668
344.5	19.392	19.701	15.874	16.381	14.306	16.157	18.846	19.034	21.143	23.372	24.393	19.568	17.184	18.683	19.079	20.569	18.326	24.062	24.307	42.127	33.618
345	19.175	19.867	15.887	16.317	14.242	16.203	18.746	18.929	21.147	23.341	24.338	19.519	17.069	18.591	19.022	20.534	18.252	23.85	24.435	42.031	33.551
345.5	18.981	19.98	15.824	16.28	14.226	16.181	18.745	18.81	21.086	23.257	24.238	19.459	16.994	18.536	19.054	20.466	18.174	23.723	24.726	42.003	33.472
346	18.889	19.994	15.746	16.304	14.311	16.133	18.797	18.643	20.89	23.148	24.049	19.413	16.968	18.492	19.131	20.385	18.128	23.73	24.778	42.108	33.53
346.5	18.821	19.974	15.662	16.315	14.397	16.088	18.84	18.64	20.715	23.13	24.038	19.402	16.918	18.417	19.172	20.423	18.114	23.891	24.635	42.125	33.459
347	18.905	19.993	15.604	16.298	14.486	16.087	18.837	18.697	20.598	23.14	24.154	19.357	16.896	18.326	19.179	20.488	18.163	23.969	24.217	41.943	33.637
347.5	19.039	20.186	15.594	16.23	14.515	16.127	18.793	18.682	20.527	23.167	24.22	19.28	16.873	18.234	19.117	20.604	18.184	23.977	23.841	41.927	33.711
348	19.135	20.224	15.629	16.159	14.535	16.107	18.712	18.621	20.471	23.162	24.159	19.223	16.806	18.184	19.037	20.668	18.138	23.775	23.764	41.955	33.796
348.5	19.182	20.111	15.663	16.127	14.579	16.049	18.66	18.518	20.366	23.124	23.959	19.216	16.778	18.155	18.945	20.575	18.058	23.649	23.921	41.966	33.911
349	19.175	20.039	15.593	16.138	14.586	15.891	18.617	18.481	20.255	23.033	23.844	19.294	16.765	18.14	18.895	20.516	17.967	23.85	24.212	41.93	33.876
349.5	19.067	19.965	15.493	16.142	14.606	15.776	18.645	18.536	20.217	23.003	23.828	19.358	16.735	18.129	18.907	20.426	17.901	24.321	24.591	41.741	33.878
350	18.939	20.012	15.422	16.124	14.676	15.826	18.681	18.668	20.234	22.918	23.989	19.314	16.743	18.14	18.877	20.393	17.905	24.537	24.712	41.674	33.808
350.5	18.709	20.026	15.405	16.077	14.652	15.917	18.735	18.649	20.217	22.826	24.066	19.197	16.731	18.248	18.906	20.334	17.873	24.32	24.707	41.711	33.818
351	18.607	19.925	15.428	16.023	14.65	15.995	18.722	18.65	20.204	22.783	23.93	19.085	16.749	18.378	18.967	20.218	17.83	24.069	24.551	41.71	33.618
351.5	18.648	19.937	15.411	15.947	14.606	16.006	18.677	18.66	20.235	22.768	23.819	19.07	16.77	18.46	19.042	20.103	17.789	23.535	24.343	41.616	33.319
352	18.708	20.02	15.308	15.87	14.388	15.84	18.696	18.61	20.23	22.751	23.661	19.147	16.731	18.456	19.099	20.096	17.756	23.563	24.198	41.536	33.166
352.5	18.863	20.191	15.202	15.798	14.223	15.706	18.749	18.541	20.223	22.645	23.638	19.155	16.7	18.37	19.034	20.183	17.802	23.826	24.083	41.526	33.089
353	18.954	20.238	15.146	15.751	14.102	15.623	18.793	18.459	20.176	22.591	23.776	19.077	16.565	18.24	18.881	20.298	17.914	24.095	24.107	41.511	33.274
353.5	18.988	20.087	15.185	15.73	14.021	15.577	18.832	18.346	20.111	22.589	23.819	18.993	16.508	18.089	18.709	20.403	18.03	24.413	24.183	41.533	33.741
354	18.952	19.88	15.231	15.72	14.001	15.556	18.83	18.283	20.075	22.566	23.79	18.957	16.502	18.011	18.661	20.412	18.116	24.662	24.2	41.454	34.09
354.5	18.802	19.659	15.272	15.705	13.997	15.539	18.789	18.355	20.08	22.607	23.764	18.968	16.541	17.969	18.677	20.337	18.121	24.622	24.098	41.404	34.379
355	18.604	19.643	15.242	15.661	13.948	15.547	18.754	18.36	20.068	22.417	23.686	18.954	16.602	18.026	18.705	20.337	18.046	24.478	24.105	41.403	34.408
355.5	18.439	19.663	15.219	15.607	13.899	15.54	18.716	18.389	20.097	22.255	23.733	18.92	16.632	18.122	18.651	20.33	17.986	24.276	24.247	41.371	34.265
356	18.344	19.723	15.228	15.532	13.926	15.532	18.66	18.448	20.159	22.232	23.867	18.873	16.668	18.163	18.541	20.284	17.938	23.922	24.673	41.375	34.065
356.5	18.198	19.726	15.278	15.508	14.078	15.581	18.534	18.36	20.151	22.303	23.853	18.812	16.647	18.148	18.46	20.255	17.997	23.774	24.912	41.29	33.831
357	18.178	19.646	15.281	15.491	14.234	15.6	18.431	18.24	20.122	22.377	23.72	18.876	16.672	18.134	18.473	20.134	18.067	23.755	24.898	41.185	33.894
357.5	18.126	19.576	15.192	15.455	14.395	15.638	18.357	18.116	20.018	22.381	23.603	18.951	16.674	18.093	18.582	20.033	18.036	23.778	24.474	41.114	33.886
358	18.046	19.455	15.05	15.384	14.446	15.747	18.331	18.058	19.943	22.337	23.523	19.068	16.727	18.106	18.814	20.027	17.908	23.826	24.131	41.051	33.895
358.5	17.976	19.372	14.945	15.28	14.446	15.875	18.41	18.132	19.907	22.282	23.481	19.124	16.773	18.122	18.99	20.097	17.84	23.941	24.03	41.015	33.821
359	17.851	19.317	14.825	15.193	14.427	15.979	18.48	18.215	19.861	22.337	23.549	19.076	16.809	18.106	19.081	20.161	17.823	23.706	23.753	40.913	33.538
359.5	17.891	19.347	14.753	15.166	14.424	15.951	18.414	18.248	19.893	22.424	23.516	18.928	16.776	18.037	19.081	20.187	17.897	23.726	23.543	40.802	33.444
360	17.979	19.536	14.688	15.169	14.442	15.929	18.353	18.197	19.98	22.486	23.473	18.754	16.67	17.896	18.96	20.176	18.003	23.715	23.289	40.731	33.348
360.5	18.074	19.75	14.603	15.188	14.441	15.912	18.295	18.101	20.053	22.494	23.428	18.708	16.586	17.728	18.863	20.138	18.008	23.705	23.228	40.73	33.353
361	18.159	19.766	14.587	15.215	14.357	15.957	18.407	18.029	20.044	22.467	23.434	18.64	16.42	17.645	18.741	20.157	17.989	23.727	23.499	40.848	33.459
361.5	18.188	19.618	14.589	15.248	14.234	15.963	18.567	17.905	19.923	22.435	23.493	18.671	16.269	17.686	18.681	20.162	17.973	23.776	23.769	40.92	33.678
362	18.176	19.475	14.591	15.266	14.114	15.869	18.695	17.796	19.623	22.395	23.542	18.763	16.172	17.744	18.678	20.16	17.937	23.95	24.084	40.928	33.988
362.5	18.151	19.564	14.584	15.252	14.07	15.752	18.756	17.772	19.427	22.356	23.559	18.749	16.156	17.783	18.618	20.124	17.974	24.169	24.114	41.003	33.866
363	18.09	19.856	14.544	15.217	14.051	15.672	18.673	17.8	19.355	22.278	23.513	18.787	16.209	17.801	18.598	20.092	18.003	24.435	24.088	41.034	33.596
363.5	18.103	20.08	14.455	15.174	14.032	15.616	18.602	17.886	19.35	22.122	23.376	18.834	16.354	17.805	18.615	20.096	18.023	24.564	23.913	41.102	33.36
364	18.149	20.034	14.363	15.129	13.964	15.578	18.58	17.878	19.425	21.986	23.19	18.854	16.439	17.867	18.707	20.118	18.03	24.549	23.426	41.077	33.167
364.5	18.077	19.795	14.305	15.108	13.85	15.512	18.586	17.873	19.464	21.939	23.048	18.9	16.509	17.93	18.865	20.121	17.92	24.618	23.473	40.937	33.475
365	17.992	19.618	14.289	15.096	13.749	15.43	18.542	17.887	19.487	21.959	22.969	18.841	16.557	17.926	18.947	20.16	17.874	24.859	23.645	40.773	33.825
365.5	17.901	19.629	14.399	15.092	13.758	15.42	18.488	17.858	19.535	22.036	22.899	18.729	16.53	17.834	18.831	20.17	17.934	25.054	24.057	40.695	34.059
366	17.873	19.58	14.461	15.082	13.781	15.465	18.421	17.897	19.525	22.07	22.959	18.612	16.552	17.747	18.688	20.195	18.06	25.086	24.451	40.618	34.084
366.5	17.943	19.662	14.499	15.063	13.938	15.58	18.342	17.834	19.546	21.999	23.07	18.515	16.477	17.664	18.57	20.195	18.179	24.781	24.316	40.588	33.873
367	17.985	19.591	14.507	15.017	14.034	15.729	18.304	17.8	19.56	21.901	23.206	18.467	16.354	17.631	18.519	20.14	18.242	23.977	23.897	40.485	33.61
367.5	18.075	19.64	14.465	14.955	14.02	15.853	18.244	17.792	19.542	21.856	23.373	18.394	16.263	17.645	18.602	20.104	18.175	23.255	23.561	40.37	33.428
368	18.153	19.699	14.46	14.907	14.018	15.945	18.22	17.794	19.531	21.885	23.478	18.374	16.188	17.672	18.675	20.057	18.088	22.903	23.403	40.442	33.494
368.5	18.115	19.641	14.386	14.908	14.021	15.964	18.243	17.763	19.465	21.922	23.49	18.362	16.2	17.706	18.74	20.096	18.03	22.976	23.652	40.656	33.61
369	18.156	19.63	14.348	14.943	14.114	15.994	18.361	17.668	19.431	21.961	23.45	18.387	16.24	17.769	18.745	20.093	17.993	23.165	24.183	40.752	33.717
369.5	18.171	19.584	14.279	15	14.239	15.915	18.378	17.632	19.485	21.942	23.39	18.485	16.262	17.861	18.707	20.165	18.089	23.48	24.734	40.715	33.855
370	18.204	19.599	14.305	14.993	14.316	15.789	18.346	17.653	19.462	21.919	23.294	18.512	16.202	17.84	18.672	20.274	18.204	23.974	25.113	40.496	33.72
370.5	18.334	19.684	14.478	14.932	14.351	15.693	18.298	17.728	19.402	21.883	23.23	18.442	16.108	17.876	18.576	20.292	18.312	23.971	25.232	40.308	33.532
371	18.448	19.762	14.581	14.879	14.215	15.509	18.249	17.819	19.313	21.791	23.318	18.471	16.087	17.83	18.555	20.375	18.345	23.925	24.97	40.273	33.375
371.5	18.542	19.725	14.692	14.869	14.099	15.402	18.198	17.761	19.151	21.746	23.325	18.457	16.106	17.817	18.502	20.365	18.233	23.699	24.616	40.189	33.455
372	18.534	19.618	14.771	14.914	13.998	15.413	18.146	17.619	19.038	21.742	23.401	18.577	16.131	17.802	18.487	20.398	18.151	23.182	24.404	40.094	33.728
372.5	18.477	19.422	14.708	14.98	13.955	15.466	17.977	17.537	18.951	21.825	23.476	18.747	16.211	17.74	18.497	20.572	18.206	23.208	24.017	40.044	33.859
373	18.331	19.274	14.685	15.057	13.985	15.531	17.777	17.43	18.884	21.918	23.506	18.761	16.248	17.717	18.511	20.617	18.198	23.25	23.616	39.961	33.904
373.5	18.441	19.39	14.723	15.112	14.023	15.584	17.672	17.402	18.876	21.94	23.504	18.744	16.325	17.622	18.529	20.606	18.184	23.449	23.463	39.935	33.528
374	18.527	19.452	14.712	15.163	14.048	15.543	17.683	17.464	18.889	21.877	23.449	18.63	16.352	17.504	18.488	20.574	18.165	23.797	23.606	39.694	33.13
374.5	18.61	19.522	14.71	15.197	14.046	15.528	17.777	17.551	18.929	21.817	23.432	18.575	16.424	17.46	18.479	20.449	18.102	24.316	24.019	39.428	32.796
375	18.767	19.524	14.639	15.201	14.014	15.592	17.879	17.562	19.058	21.775	23.402	18.621	16.441	17.487	18.403	20.372	18.094	24.66	24.466	39.267	32.604
375.5	18.707	19.391	14.567	15.252	13.918	15.669	17.771	17.526	19.127	21.703	23.378	18.671	16.463	17.555	18.399	20.179	18.004	25.037	24.332	39.253	32.763
376	18.718	19.235	14.544	15.324	13.769	15.707	17.624	17.378	19.102	21.692	23.21	18.6	16.505	17.553	18.397	19.928	17.787	25.341	23.857	39.3	32.836
376.5	18.732	19.087	14.58	15.345	13.63	15.729	17.52	17.196	19.004	21.658	23.113	18.39	16.415	17.446	18.362	19.876	17.656	25.287	23.4	39.245	32.61
377	18.75	19.038	14.735	15.312	13.615	15.682	17.433	17.067	18.858	21.509	23.023	18.173	16.316	17.291	18.298	19.886	17.676	24.991	23.117	39.145	32.359
377.5	18.833	19.047	14.864	15.261	13.681	15.587	17.478	16.951	18.794	21.251	22.906	18.008	16.166	17.199	18.182	19.991	17.799	24.224	23.114	38.879	31.863
378	18.859	19.11	14.933	15.225	13.715	15.559	17.529	16.94	18.89	21.041	22.898	18.029	16.065	17.271	18.143	20.063	17.968	23.468	23.257	38.907	31.571
378.5	18.811	19.12	14.947	15.276	13.693	15.497	17.526	16.953	19.026	21.002	22.887	18.147	16.015	17.325	18.097	20.024	18.045	23.249	23.389	39.044	31.798
379	18.687	19.121	14.903	15.351	13.628	15.418	17.591	16.964	19.086	21.126	22.906	18.215	15.931	17.336	18.166	19.966	18.061	23.186	23.454	39.161	32.124
379.5	18.813	19.102	14.888	15.379	13.647	15.346	17.582	17.019	19.07	21.391	23.165	18.223	15.924	17.294	18.285	19.94	18.156	23.33	23.565	39.363	32.491
380	19.06	19.156	14.91	15.384	13.743	15.317	17.488	17.061	18.933	21.476	23.285	18.213	15.957	17.184	18.365	19.895	18.259	23.346	23.254	39.304	32.633
380.5	19.196	19.241	14.859	15.354	13.85	15.304	17.386	17.224	18.78	21.459	23.31	18.234	15.969	17.162	18.511	19.933	18.313	23.294	22.746	39.262	32.556
381	19.31	19.287	14.883	15.384	13.793	15.334	17.183	17.266	18.667	21.368	23.39	18.244	15.947	17.193	18.484	19.963	18.243	23.437	22.573	39.084	32.207
381.5	19.118	19.34	14.932	15.445	13.663	15.362	17.02	17.215	18.613	21.149	23.29	18.208	15.875	17.15	18.407	19.947	18.079	24.089	22.823	38.869	31.874
382	18.829	19.172	14.927	15.491	13.449	15.272	16.848	17.096	18.679	21.018	23.26	18.149	15.74	17.117	18.297	19.897	17.874	24.408	23.485	38.754	31.847
382.5	18.591	18.805	14.956	15.486	13.273	15.154	16.76	16.992	18.749	20.931	23.164	18.144	15.754	17.088	18.168	19.787	17.785	24.373	24.003	38.767	31.995
383	18.347	18.543	14.924	15.45	13.182	14.983	16.769	17.019	18.863	20.937	23.032	18.221	15.703	17.089	18.103	19.72	17.793	24.285	23.951	38.772	32.871
383.5	18.239	18.322	14.99	15.406	13.195	14.87	16.825	17.069	18.911	21.038	23.011	18.314	15.661	17.084	18.084	19.805	17.929	24.189	24.141	38.652	33.406
384	18.373	18.328	15.126	15.428	13.291	14.865	16.859	17.063	18.916	21.1	23.051	18.332	15.652	17.047	18.035	19.975	18.117	24.332	24.35	38.602	33.293
384.5	18.587	18.447	15.262	15.474	13.337	14.856	16.872	16.973	18.996	21.124	23.102	18.224	15.609	17.065	18.005	20.245	18.24	24.248	24.343	38.667	33.119
385	18.741	18.491	15.241	15.538	13.235	14.921	16.796	16.898	19.102	21.156	23.117	18.192	15.577	17.152	17.997	20.452	18.218	23.975	24.015	38.943	32.897
385.5	18.788	18.629	15.243	15.6	13.148	15.023	16.607	16.893	19.143	21.241	23.084	18.119	15.557	17.224	18.051	20.625	18.229	23.797	23.338	39.253	33.199
386	18.588	18.673	15.345	15.652	13.036	15.129	16.54	16.927	19.186	21.25	23.108	18.044	15.496	17.21	18.178	20.739	18.18	24.012	22.898	39.283	33.315
386.5	18.395	18.514	15.415	15.711	13.076	15.261	16.487	16.986	19.124	21.334	23.052	17.982	15.519	17.116	18.217	20.615	18.156	24.854	22.909	39.089	33.096
387	18.338	18.27	15.496	15.686	13.221	15.28	16.503	16.933	18.975	21.346	22.82	17.905	15.678	17.062	18.196	20.593	18.189	25.098	23.069	38.804	32.899
387.5	18.413	18.085	15.42	15.635	13.248	15.13	16.616	16.941	18.908	21.375	22.509	17.84	15.797	17.032	18.109	20.374	18.124	24.842	23.629	38.698	32.753
388	18.533	17.986	15.231	15.56	13.237	14.984	16.564	16.978	18.951	21.341	22.291	17.798	15.842	16.996	18.016	20.219	18.133	24.65	23.832	38.723	32.678
388.5	18.684	18.174	15.097	15.442	13.188	14.911	16.447	17.017	19.051	21.304	22.254	17.77	15.825	16.984	17.91	20.099	18.214	24.119	23.435	38.821	32.58
389	18.865	18.443	15.046	15.374	13.113	14.937	16.36	16.983	19.281	21.135	22.285	17.83	15.811	17.008	17.755	19.871	18.063	24.092	23.221	38.899	32.213
389.5	18.879	18.643	15.096	15.261	13.041	14.931	16.308	16.86	19.278	20.956	22.324	17.981	15.874	17.089	17.684	19.871	17.977	23.865	22.721	38.846	31.857
390	18.841	18.584	15.219	15.162	12.925	14.932	16.356	16.834	19.225	20.916	22.346	18.167	15.973	17.154	17.726	19.888	17.861	23.606	22.401	38.748	31.712
390.5	18.749	18.38	15.177	15.233	12.821	14.872	16.376	16.846	19.35	20.826	22.237	18.378	15.871	17.182	17.93	19.904	17.823	23.822	22.904	39.06	31.801
391	18.573	18.264	15.013	15.315	12.693	14.783	16.274	16.849	19.427	20.821	22.187	18.469	15.538	17.081	18.074	19.974	17.961	24.159	23.142	39.242	31.344
391.5	18.552	18.319	14.757	15.419	12.653	14.695	16.063	16.869	19.45	20.767	21.921	18.379	15.389	16.928	18.149	19.968	18.11	24.944	23.815	39.513	31.39
392	18.449	18.637	14.578	15.501	12.683	14.638	15.87	16.743	19.231	20.74	21.718	18.171	15.404	16.785	18.21	20.137	18.269	25.272	24.255	39.569	31.45
392.5	18.248	18.732	14.406	15.537	12.661	14.549	15.645	16.643	18.913	20.747	21.512	17.932	15.501	16.674	18.133	20.338	18.341	25.822	24.824	39.559	31.51
393	18.157	18.597	14.304	15.56	12.634	14.506	15.517	16.636	18.846	20.844	21.492	17.78	15.612	16.684	18.181	20.464	18.328	26.035	25.371	39.456	32.427
393.5	18.163	18.401	14.294	15.528	12.538	14.477	15.459	16.685	19.074	20.954	21.684	17.825	15.559	16.716	18.151	20.489	18.312	26.415	25.994	39.472	32.677
394	18.377	18.208	14.244	15.492	12.377	14.348	15.42	16.868	19.445	21.041	21.854	17.911	15.704	16.907	18.193	20.463	18.291	26.356	26.167	39.546	32.966
394.5	18.439	17.954	14.388	15.48	12.28	14.218	15.357	16.988	19.651	20.908	21.981	17.835	15.781	16.957	18.284	20.427	18.252	25.799	25.52	39.507	32.75
395	18.475	17.751	14.594	15.519	12.254	14.094	15.153	17.139	19.683	20.749	22.184	17.694	15.752	17.025	18.301	20.302	18.15	25.068	24.396	39.65	32.088
395.5	18.471	17.65	14.778	15.593	12.289	14.047	14.908	17.217	19.563	20.494	22.197	17.55	15.53	17.082	18.234	20.169	18.025	24.394	23.352	39.624	31.947
396	18.534	17.554	14.907	15.524	12.52	14.175	14.877	17.075	19.308	20.327	22.212	17.482	15.27	16.908	18.106	20.008	17.857	23.835	23.054	39.678	31.954
396.5	18.732	17.674	15.007	15.425	12.701	14.332	14.947	16.854	19.165	20.173	22.115	17.584	15.157	16.816	18	19.924	17.836	23.673	22.741	39.938	32.492
397	18.755	17.797	15.012	15.343	12.809	14.509	15.075	16.575	18.943	20.059	21.917	17.811	15.192	16.742	17.896	19.798	17.697	24.036	22.997	40.051	32.815
397.5	18.729	17.99	15.061	15.406	12.704	14.543	15.048	16.411	18.882	20.062	22.008	18.013	15.311	16.713	17.852	19.59	17.672	24.638	23.751	40.162	32.866
398	18.64	18.262	15.1	15.545	12.441	14.549	14.844	16.313	18.929	20.221	22.102	18.207	15.516	16.969	17.82	19.586	17.667	25.688	23.932	40.063	32.406
398.5	18.517	18.331	14.988	15.531	12.138	14.403	14.596	16.244	18.947	20.417	21.976	18.296	15.632	17.12	17.906	19.853	17.763	26.188	24.107	39.739	31.629
399	18.315	18.223	14.894	15.426	11.924	14.271	14.359	16.13	19.012	20.525	21.597	18.182	15.748	17.083	18.083	20.229	17.892	25.988	23.749	39.607	31.002
399.5	18.149	18.007	14.827	15.304	11.838	14.199	14.274	16.04	19.062	20.667	21.339	18.022	15.829	17.06	18.168	20.53	17.941	25.393	22.819	39.633	30.707
400	18.08	17.767	14.864	15.182	12.083	14.384	14.393	15.96	18.955	20.676	21.2	17.814	15.676	16.913	18.188	20.59	18.039	24.732	22.752	39.844	30.644
400.5	18.059	17.63	14.956	15.171	12.233	14.61	14.693	16.055	18.872	20.66	21.343	17.537	15.491	16.759	17.99	20.463	18.195	24.313	23.016	40.337	30.814
401	18.17	17.578	15.033	15.208	12.225	14.691	14.837	16.243	18.765	20.599	21.467	17.46	15.304	16.769	17.858	20.378	18.419	24.164	23.871	40.64	30.353
401.5	18.366	17.57	15.07	15.183	12.223	14.488	14.719	16.37	18.682	20.416	21.376	17.609	15.194	16.745	17.916	20.427	18.674	24.741	25.015	40.745	29.834
402	18.377	17.411	15.021	15.201	12.229	14.152	14.444	16.553	18.781	20.218	21.25	17.84	15.098	16.601	17.915	20.513	18.71	25.128	25.315	40.489	29.976
402.5	18.482	17.23	14.849	15.171	12.277	14.001	14.098	16.418	18.878	20.009	20.879	17.975	15.143	16.792	17.951	20.659	18.611	25.991	25.575	39.876	30.562
403	18.46	17.158	14.69	15.178	12.314	14.077	13.966	16.33	19.05	19.932	20.622	17.759	15.041	16.804	17.908	20.759	18.504	26.688	25.074	39.339	31.375
403.5	18.372	17.248	14.556	15.188	12.201	14.228	14.074	16.45	19.19	20.039	20.625	17.456	15.092	16.858	17.933	20.701	18.367	26.104	24.689	38.958	31.742
404	18.465	17.692	14.622	15.24	12.073	14.373	14.25	16.476	19.143	20.321	20.645	17.245	15.088	16.905	17.945	20.674	18.431	25.261	24.555	39.091	31.976
404.5	18.332	17.911	14.717	15.298	12.043	14.311	14.311	16.652	19.139	20.556	20.889	17.158	15.008	16.687	17.758	20.61	18.376	24.631	23.842	39.393	31.853
405	18.141	17.887	14.788	15.359	12.083	14.19	14.277	16.656	19.082	20.569	21.024	17.236	15.01	16.541	17.447	20.535	18.269	24.474	23.554	39.806	31.415
405.5	17.982	17.667	14.846	15.416	12.151	14.196	14.141	16.541	19.181	20.447	20.92	17.452	15.051	16.428	17.215	20.56	18.244	24.812	23.206	39.979	30.568
406	17.737	17.493	14.987	15.475	12.181	14.27	14.094	16.49	19.359	20.423	20.914	17.695	15.24	16.462	17.151	20.579	18.301	24.712	23.198	40.017	29.894
406.5	17.983	17.567	15.3	15.491	12.222	14.586	14.219	16.478	19.545	20.581	20.811	17.936	15.375	16.437	17.305	20.665	18.481	24.634	23.412	39.989	29.457
407	18.342	17.751	15.664	15.518	12.309	14.828	14.195	16.475	19.664	20.779	20.747	18.041	15.551	16.391	17.428	20.73	18.632	25.488	23.889	39.763	29.975
407.5	18.662	18	15.964	15.572	12.462	14.905	14.105	16.43	19.62	20.757	20.827	17.897	15.485	16.245	17.464	20.609	18.621	26.998	24.272	39.668	30.57
408	18.934	17.959	15.944	15.595	12.609	14.758	14.15	16.342	19.526	20.646	21.076	17.688	15.264	16.131	17.672	20.546	18.488	28.204	24.313	39.794	30.637
408.5	19.036	17.911	15.818	15.642	12.684	14.537	14.111	16.322	19.5	20.52	21.288	17.571	15.066	16.175	17.771	20.546	18.426	27.92	24.195	40.115	30.662
409	19.078	17.786	15.694	15.623	12.72	14.458	14.211	16.369	19.397	20.639	21.385	17.538	15.049	16.331	17.901	20.539	18.393	26.38	23.941	40.452	30.242
409.5	19.188	17.732	15.722	15.52	12.645	14.484	14.324	16.438	19.4	20.887	21.328	17.519	15.208	16.495	17.849	20.63	18.344	24.891	23.458	40.498	30.306
410	19.166	17.727	15.837	15.432	12.509	14.573	14.237	16.391	19.434	21.1	21.141	17.467	15.308	16.503	17.74	20.692	18.396	24.159	23.827	40.303	30.479
410.5	19.039	17.681	15.886	15.339	12.463	14.701	14.156	16.411	19.381	20.989	21.126	17.33	15.105	16.362	17.619	20.601	18.288	24.226	24.029	39.958	30.476
411	18.912	17.61	15.818	15.346	12.396	14.744	14.015	16.545	19.43	20.691	21.263	17.3	14.904	16.196	17.54	20.51	18.226	24.529	24.166	39.746	30.748
411.5	18.733	17.496	15.62	15.435	12.405	14.777	13.887	16.578	19.369	20.401	21.484	17.282	14.753	16.17	17.462	20.368	18.23	24.777	24.136	39.578	31.031
412	18.632	17.504	15.436	15.534	12.396	14.64	13.747	16.622	19.138	20.305	21.802	17.299	14.821	16.284	17.407	20.238	18.217	25.846	24.172	39.409	31.138
412.5	18.444	17.537	15.355	15.627	12.412	14.475	13.703	16.564	19.091	20.326	22.012	17.25	14.886	16.407	17.405	20.253	18.265	27.027	24.751	39.214	31.127
413	18.412	17.547	15.397	15.559	12.389	14.389	13.71	16.626	19.133	20.516	22.206	17.104	14.803	16.366	17.34	20.26	18.216	27.472	24.631	39.053	30.857
413.5	18.434	17.472	15.525	15.491	12.382	14.377	13.727	16.878	19.38	20.68	22.386	17.055	14.593	16.146	17.229	20.257	18.067	27.341	24.784	39.03	30.553
414	18.608	17.337	15.685	15.462	12.376	14.48	13.835	17.083	19.767	20.79	22.485	17.006	14.305	15.973	17.157	20.421	17.916	26.95	24.99	38.954	30.308
414.5	18.814	17.557	15.773	15.597	12.286	14.442	13.942	17.127	19.935	20.73	22.463	17.026	14.217	15.927	17.048	20.529	17.839	26.78	25.353	39.054	29.82
415	18.879	17.733	15.829	15.789	12.212	14.435	13.94	17.081	19.991	20.679	22.39	16.955	14.283	15.988	17.102	20.667	17.91	27.131	26.322	39.104	29.578
415.5	18.884	17.823	15.811	15.84	12.138	14.443	14.048	16.838	19.701	20.446	22.054	16.942	14.547	16.142	17.269	20.644	18	26.996	25.972	39.174	29.89
416	18.79	17.834	15.743	15.759	12.007	14.397	13.991	16.669	19.338	20.415	21.741	16.889	14.749	16.189	17.338	20.463	18.147	26.31	25.258	39.27	30.452
416.5	18.75	17.733	15.678	15.591	11.928	14.347	13.976	16.563	19.14	20.549	21.573	16.828	14.836	16.2	17.37	20.32	18.108	25.776	24.657	39.27	30.793
417	18.718	17.741	15.713	15.455	12.161	14.381	13.838	16.552	19.261	20.625	21.499	16.78	14.818	16.115	17.28	20.289	18.106	25.721	24.846	39.152	30.678
417.5	18.879	17.969	15.767	15.423	12.463	14.449	13.883	16.7	19.459	20.707	21.68	16.772	14.709	15.989	17.292	20.378	17.908	25.01	25.494	38.929	30.821
418	19.001	18.01	15.81	15.429	12.682	14.609	13.934	16.96	19.624	20.7	21.867	16.835	14.559	15.889	17.301	20.525	17.799	24.367	25.886	38.823	30.959
418.5	19.056	18.03	15.767	15.42	12.619	14.655	14.024	17.094	19.612	20.58	21.964	16.94	14.417	15.775	17.198	20.478	17.744	23.844	26.142	38.736	30.772
419	19.098	18.051	15.673	15.4	12.366	14.656	14.147	17.174	19.537	20.563	22.031	17.006	14.388	15.635	17.049	20.336	17.671	23.67	25.74	38.935	30.334
419.5	18.967	17.896	15.616	15.355	12.08	14.672	14.074	17.114	19.577	20.583	21.995	17.023	14.547	15.65	16.917	20.148	17.734	24.817	25.659	39.139	29.136
420	18.983	17.875	15.633	15.308	11.985	14.646	14.027	16.983	19.531	20.673	21.887	17.068	14.807	15.872	16.964	20.164	17.794	25.702	25.92	39.29	28.172
420.5	19.016	17.814	15.621	15.289	12.057	14.596	13.965	16.84	19.497	20.685	21.674	17.118	15.024	16.285	17.231	20.335	17.896	26.858	26.446	39.338	28.127
421	18.962	17.781	15.624	15.28	12.178	14.54	13.821	16.859	19.49	20.664	21.555	17.039	15.089	16.516	17.306	20.402	17.937	27.221	27.024	39.192	28.782
421.5	19.07	17.842	15.637	15.31	12.292	14.594	13.673	16.933	19.528	20.665	21.6	16.988	14.995	16.484	17.338	20.404	18.005	27.234	27.249	39.218	29.878
422	19.155	17.84	15.674	15.367	12.379	14.742	13.728	17.16	19.576	20.619	21.95	16.931	14.724	16.137	17.217	20.304	17.991	26.953	26.649	39.282	30.487
422.5	19.242	17.843	15.725	15.397	12.391	14.864	13.77	17.268	19.484	20.618	22.19	16.955	14.51	15.858	17.068	20.204	17.93	26.497	25.972	39.382	30.198
423	19.237	17.968	15.729	15.379	12.381	14.929	13.787	17.122	19.361	20.614	22.127	17.096	14.484	15.755	17.031	20.291	17.957	26.392	25.718	39.51	29.893
423.5	19.194	18.108	15.7	15.387	12.248	14.867	13.7	17.078	19.475	20.58	21.972	17.17	14.484	15.713	16.928	20.438	17.916	26.151	26.201	39.417	30.113
424	19.248	18.277	15.664	15.366	12.091	14.786	13.499	17.088	19.735	20.606	21.914	17.263	14.514	15.842	17.005	20.501	17.942	25.986	26.968	39.351	30.341
424.5	19.166	18.212	15.662	15.291	12.015	14.688	13.441	17.353	19.914	20.638	21.922	17.25	14.462	15.95	16.988	20.475	17.942	25.719	27.247	39.291	30.22
425	19.126	18.181	15.731	15.229	12.042	14.569	13.506	17.561	19.856	20.595	22.022	17.09	14.435	15.911	16.957	20.419	17.889	25.331	27.14	39.331	29.801
425.5	18.966	18.154	15.846	15.206	12.208	14.558	13.513	17.54	19.577	20.484	22.063	16.77	14.434	15.736	16.969	20.432	17.927	25.38	27.055	39.417	29.4
426	18.927	18.321	16.062	15.335	12.394	14.54	13.601	17.308	19.447	20.382	22.202	16.499	14.494	15.515	16.9	20.442	18.015	25.348	26.827	39.522	29.248
426.5	18.912	18.363	16.212	15.535	12.492	14.542	13.735	17.083	19.552	20.423	22.511	16.413	14.527	15.429	16.974	20.473	18.105	25.465	26.622	39.552	29.54
427	18.936	18.184	16.161	15.667	12.46	14.568	13.78	17.085	19.655	20.624	22.562	16.58	14.549	15.586	16.994	20.411	18.12	26.25	26.494	39.566	29.524
427.5	18.983	18.143	16.057	15.705	12.369	14.607	13.899	17.202	19.65	20.894	22.497	16.89	14.688	15.802	17.052	20.341	18.014	27.045	27.317	39.587	29.283
428	18.954	18.036	15.955	15.682	12.339	14.764	13.947	17.363	19.591	21.064	22.349	17.092	14.823	16.009	17.106	20.338	17.967	27.605	28.122	39.452	29.27
428.5	18.973	18.138	15.957	15.535	12.478	14.809	13.955	17.452	19.638	21.03	22.18	16.996	14.933	16.042	17.107	20.322	18.046	27.703	28.565	39.341	29.419
429	18.867	18.24	15.992	15.384	12.603	14.879	13.967	17.478	19.733	20.831	22.174	16.863	14.949	16.009	16.984	20.333	18.163	27.664	28.761	39.317	29.832
429.5	18.721	18.179	15.916	15.228	12.558	14.84	13.899	17.536	19.862	20.662	22.227	16.684	14.761	15.794	16.71	20.36	18.24	27.681	28.515	39.314	30.058
430	18.768	18.206	15.836	15.04	12.507	14.81	13.876	17.559	19.872	20.599	22.164	16.676	14.567	15.655	16.588	20.418	18.187	27.766	29.312	39.446	29.863
430.5	18.922	18.195	15.72	14.969	12.468	14.788	13.895	17.511	19.867	20.595	22.189	16.765	14.549	15.624	16.718	20.351	18.144	27.693	29.86	39.405	29.698
431	19.091	18.231	15.707	15.021	12.593	14.768	13.917	17.28	19.791	20.536	22.016	16.956	14.717	15.697	17.054	20.274	18.177	27.497	30.131	39.281	29.906
431.5	19.123	18.285	15.801	15.119	12.85	14.802	13.893	17.127	19.819	20.406	21.98	17.151	14.943	15.933	17.327	20.193	18.274	27.903	30.111	39.231	30.131
432	18.892	18.347	16.008	15.195	13.006	14.88	13.792	16.963	19.765	20.359	22.061	17.236	15.013	16.04	17.418	20.142	18.309	28.505	29.101	39.424	29.996
432.5	18.712	18.348	16.244	15.187	12.992	14.892	13.821	17.02	19.924	20.444	22.184	17.249	14.962	16.109	17.428	20.188	18.262	28.694	27.881	39.708	29.721
433	18.704	18.207	16.367	15.173	12.902	14.856	13.827	17.225	19.997	20.566	22.188	17.129	14.833	16.021	17.361	20.239	18.175	28.233	26.875	39.766	29.339
433.5	18.725	17.972	16.249	15.218	12.68	14.792	13.823	17.373	19.99	20.651	22.221	17.059	14.657	15.875	17.345	20.296	18.156	27.384	26.717	39.506	29.291
434	18.787	17.828	16.142	15.249	12.492	14.772	13.847	17.491	19.849	20.723	22.283	17.002	14.553	15.791	17.357	20.329	18.147	26.887	27.29	39.144	29.461
434.5	18.856	17.913	16.066	15.269	12.46	14.829	13.862	17.465	19.618	20.756	22.506	17.026	14.497	15.818	17.335	20.25	18.121	26.901	27.872	38.987	29.501
435	19.007	18.186	16.114	15.264	12.466	15.007	13.937	17.427	19.471	20.792	22.775	16.967	14.527	15.859	17.282	20.152	18.027	26.989	28.084	39.152	29.638
435.5	19.19	18.442	16.198	15.256	12.573	15.183	14.11	17.372	19.349	20.683	22.929	16.828	14.61	15.819	17.17	20.061	18.004	26.975	27.746	39.298	29.615
436	19.28	18.531	16.197	15.212	12.819	15.339	14.146	17.293	19.387	20.489	22.938	16.707	14.57	15.774	17.058	20.049	18.041	27.328	27.931	39.348	29.807
436.5	19.227	18.503	16.168	15.159	12.963	15.461	14.127	17.225	19.48	20.389	22.852	16.719	14.522	15.788	16.976	19.987	18.008	27.454	28.5	39.282	29.788
437	19.287	18.382	16.14	15.071	12.934	15.431	14.01	17.144	19.439	20.392	22.835	16.879	14.422	15.812	16.929	19.895	18.035	27.718	29.202	39.136	30.09
437.5	19.274	18.308	16.098	15.02	12.764	15.254	13.843	17.114	19.425	20.511	22.723	17.006	14.402	15.853	16.853	19.666	17.955	27.898	29.461	39.001	30.286
438	19.27	18.268	16.061	15.009	12.595	15.067	13.74	17.108	19.262	20.571	22.541	17.009	14.444	15.788	16.867	19.433	17.923	28.047	28.945	38.948	30.127
438.5	19.265	18.36	15.939	15.022	12.532	14.857	13.66	17.086	19.175	20.497	22.317	16.875	14.529	15.793	16.949	19.389	18.05	28.176	28.364	38.919	29.874
439	19.201	18.482	15.711	15.076	12.514	14.655	13.608	17.086	19.13	20.371	22.18	16.728	14.627	15.788	17.046	19.355	18.094	27.945	28.185	38.844	29.223
439.5	19.338	18.517	15.615	15.139	12.585	14.662	13.603	17.019	19.103	20.35	22.243	16.539	14.505	15.782	17.114	19.549	18.283	27.201	28.477	38.732	28.713
440	19.542	18.54	15.628	15.205	12.656	14.75	13.621	17.031	19.123	20.514	22.296	16.402	14.328	15.694	17.06	19.868	18.435	26.688	28.367	38.656	28.675
440.5	19.745	18.578	15.773	15.263	12.723	14.956	13.621	17.222	19.242	20.681	22.322	16.305	14.173	15.545	16.916	20.119	18.48	26.385	28.063	38.825	29.085
441	19.717	18.464	16.015	15.23	12.76	15.182	13.623	17.506	19.452	20.766	22.325	16.408	14.172	15.54	16.829	20.314	18.433	26.092	27.794	39.207	29.605
441.5	19.551	18.412	16.227	15.158	12.744	15.292	13.588	17.717	19.555	20.673	22.326	16.538	14.363	15.622	16.747	20.194	18.275	26.321	27.906	39.596	29.998
442	19.21	18.265	16.266	15.125	12.783	15.194	13.624	17.59	19.541	20.597	22.402	16.623	14.543	15.782	16.678	19.915	18.05	26.713	28.572	39.533	30.166
442.5	18.958	18.165	16.19	15.127	12.839	15.068	13.641	17.435	19.502	20.628	22.499	16.683	14.701	15.838	16.712	19.773	17.934	27.416	28.885	39.398	30.09
443	18.762	18.047	16.078	15.181	12.905	15.011	13.671	17.277	19.457	20.652	22.535	16.81	14.846	15.841	16.794	19.791	17.879	28.322	29.096	39.294	29.963
443.5	18.789	17.965	15.964	15.206	12.895	15.038	13.695	17.273	19.486	20.703	22.537	17.007	14.888	15.75	16.925	19.959	17.919	28.434	28.82	39.441	29.94
444	18.857	17.976	15.909	15.195	12.883	15.073	13.725	17.278	19.397	20.574	22.493	17.196	14.851	15.667	17.052	20.138	18.071	28.253	28.652	39.606	29.57
444.5	19.044	18.154	15.952	15.188	12.89	15.028	13.742	17.254	19.263	20.394	22.437	17.267	14.769	15.638	17.01	20.093	18.067	27.763	28.439	39.435	29.545
445	19.077	18.318	15.997	15.17	12.876	14.887	13.78	17.37	19.189	20.348	22.495	17.29	14.663	15.613	17.02	20.014	18.144	26.715	28.056	39.034	29.663
445.5	19.056	18.324	16.042	15.096	12.839	14.765	13.783	17.522	19.342	20.367	22.587	17.229	14.642	15.631	17.015	19.919	18.077	26.082	27.96	38.824	29.628
446	19.01	18.318	16.077	14.974	12.791	14.742	13.77	17.583	19.54	20.51	22.631	17.117	14.6	15.596	16.988	19.9	17.987	25.916	27.671	38.88	29.599
446.5	19.016	18.257	16.048	14.892	12.815	14.836	13.719	17.501	19.627	20.63	22.58	16.99	14.473	15.543	16.942	19.932	17.877	26.488	28.068	38.981	29.388
447	19.109	18.307	16.019	14.852	12.925	14.968	13.717	17.421	19.61	20.669	22.566	16.886	14.416	15.527	16.887	19.891	17.775	27.129	28.317	39.058	29.081
447.5	19.279	18.45	15.986	14.888	13.086	15.044	13.747	17.43	19.552	20.707	22.694	16.951	14.482	15.642	16.97	19.876	17.816	27.424	28.395	39.12	29.124
448	19.492	18.464	15.988	14.909	13.103	15.016	13.819	17.497	19.56	20.734	22.894	16.984	14.524	15.727	17.095	19.91	17.966	27.523	28.456	39.074	29.277
448.5	19.579	18.433	16.024	14.922	13.074	14.999	13.885	17.573	19.561	20.675	23.146	16.985	14.518	15.729	17.137	19.957	18.113	27.456	28.122	39.001	29.492
449	19.651	18.386	16.071	14.965	12.972	14.998	13.945	17.604	19.493	20.604	23.197	17.019	14.416	15.668	17.145	19.965	18.171	27.485	28.176	38.948	29.535
449.5	19.588	18.344	16.174	15.033	12.89	15.027	13.982	17.678	19.408	20.513	23.137	17.047	14.332	15.617	17.115	19.832	18.134	27.435	28.19	38.849	29.593
450	19.648	18.402	16.292	15.087	12.875	15.081	13.975	17.756	19.374	20.525	23.081	17.029	14.391	15.636	17.128	19.645	18.086	27.341	28.084	38.94	29.407
450.5	19.715	18.413	16.366	15.079	12.938	15.137	13.925	17.68	19.366	20.58	23.084	17.109	14.557	15.709	17.14	19.499	17.99	26.973	27.979	38.935	29.401
451	19.646	18.343	16.362	15.069	12.964	15.167	13.857	17.653	19.455	20.594	23.067	17.13	14.606	15.743	17.099	19.471	17.949	26.776	28.004	38.784	29.368
451.5	19.583	18.227	16.273	14.954	12.959	15.135	13.849	17.579	19.498	20.549	22.975	17.178	14.514	15.692	17.047	19.537	17.906	26.569	27.923	38.607	29.609
452	19.601	18.201	16.154	14.899	12.937	15.056	13.836	17.674	19.506	20.481	22.903	17.242	14.397	15.676	16.97	19.746	17.873	26.602	27.805	38.599	29.906
452.5	19.724	18.199	16.079	14.923	12.919	14.966	13.804	17.835	19.456	20.534	22.915	17.152	14.266	15.679	16.916	19.863	17.846	26.827	27.576	38.595	30.368
453	19.923	18.24	15.987	15.017	12.888	14.972	13.772	17.938	19.413	20.71	23.143	17.144	14.274	15.739	16.951	19.776	17.753	26.814	27.206	38.688	30.622
453.5	19.957	18.19	15.896	15.133	12.843	14.982	13.827	18.014	19.447	20.821	23.351	17.2	14.289	15.848	17.06	19.549	17.693	26.697	27.127	38.702	30.556
454	19.86	18.155	15.84	15.097	12.834	15.096	13.942	17.852	19.498	20.791	23.426	17.261	14.29	15.864	17.203	19.39	17.64	26.525	27.41	38.637	30.263
454.5	19.721	18.145	15.861	15.048	12.881	15.156	14.044	17.727	19.476	20.587	23.436	17.329	14.249	15.805	17.2	19.323	17.568	26.259	27.661	38.53	29.709
455	19.656	18.132	15.92	15.056	12.912	15.068	14.03	17.718	19.612	20.459	23.422	17.253	14.231	15.715	17.014	19.363	17.533	26.176	27.786	38.452	29.138
455.5	19.59	18.149	15.922	15.125	12.837	14.938	13.918	17.752	19.762	20.471	23.388	17.135	14.239	15.606	16.797	19.463	17.562	26.739	28.057	38.367	28.812
456	19.522	18.148	15.862	15.147	12.671	14.812	13.856	17.778	19.845	20.396	23.277	17.103	14.284	15.589	16.734	19.541	17.733	27.506	28.472	38.323	28.677
456.5	19.557	18.177	15.802	15.112	12.575	14.847	13.838	17.755	19.879	20.322	23.07	17.075	14.297	15.565	16.813	19.591	17.847	28.039	28.542	38.268	28.889
457	19.528	18.339	15.86	15.055	12.618	14.983	13.799	17.755	19.735	20.119	22.902	17.094	14.22	15.619	16.943	19.585	17.95	27.743	28.355	38.245	29.307
457.5	19.438	18.281	15.997	15.014	12.812	15.123	13.777	17.878	19.758	20.037	22.953	17.085	14.155	15.717	16.991	19.539	17.904	27.037	27.597	38.242	29.651
458	19.435	18.295	16.172	14.965	12.982	15.226	13.771	17.997	19.813	20.005	23.049	17	14.097	15.789	16.935	19.483	17.843	26.698	27.241	38.264	29.795
458.5	19.407	18.357	16.27	14.912	13.025	15.293	13.799	17.968	19.794	20.007	23.013	16.978	14.17	15.843	16.977	19.516	17.811	26.787	27.073	38.257	29.716
459	19.56	18.481	16.268	14.915	13.003	15.351	13.927	17.917	19.729	20.04	22.868	17.017	14.268	15.832	17.039	19.506	17.759	27.207	27.148	38.155	29.461
459.5	19.664	18.645	16.247	14.933	12.963	15.412	14.02	17.843	19.608	20.101	22.694	17.119	14.413	15.76	17.12	19.505	17.791	27.324	26.935	38.13	29.118
460	19.697	18.61	16.2	15	12.954	15.421	14.089	17.891	19.604	20.211	22.631	17.15	14.534	15.662	17.115	19.623	17.814	27.6	27.185	38.302	29.058
460.5	19.659	18.477	16.197	15.084	12.957	15.354	14.088	17.847	19.663	20.222	22.698	17.17	14.654	15.569	17.048	19.653	17.813	27.918	27.633	38.484	29.103
461	19.511	18.394	16.234	15.155	12.894	15.246	14.04	17.762	19.686	20.137	22.931	17.155	14.694	15.613	17.061	19.66	17.834	28.094	28.251	38.557	29.522
461.5	19.416	18.397	16.266	15.215	12.815	15.135	13.977	17.662	19.69	20.044	23.126	17.127	14.673	15.698	17.145	19.648	17.879	28	28.566	38.474	29.87
462	19.268	18.496	16.276	15.201	12.735	15.121	13.907	17.612	19.566	20.041	23.367	17.059	14.53	15.764	17.113	19.551	17.878	27.84	28.638	38.234	30.106
462.5	19.345	18.53	16.288	15.131	12.673	15.156	13.834	17.709	19.542	20.209	23.497	16.931	14.335	15.751	17.078	19.514	17.902	27.705	28.815	38.134	29.976
463	19.387	18.437	16.286	15.08	12.71	15.161	13.789	17.795	19.545	20.463	23.477	16.807	14.184	15.69	16.938	19.392	17.867	28.044	28.785	38.164	29.507
463.5	19.436	18.205	16.227	15.058	12.816	15.093	13.75	17.83	19.59	20.55	23.493	16.879	14.193	15.708	16.924	19.313	17.883	28.348	29.253	38.208	29.133
464	19.473	18.041	16.117	15.025	12.898	14.983	13.821	17.839	19.645	20.433	23.46	16.945	14.243	15.691	16.976	19.415	17.946	28.562	29.374	38.219	28.785
464.5	19.583	18.068	16.013	15.002	12.923	15.007	13.869	17.782	19.664	20.353	23.471	16.924	14.205	15.616	16.907	19.559	17.974	28.722	29.43	38.088	28.9
465	19.692	18.187	16.016	14.965	12.888	15.092	13.934	17.67	19.639	20.189	23.458	16.857	14.104	15.495	16.879	19.712	17.968	28.488	29.417	37.915	29.06
465.5	19.749	18.28	16.09	14.915	12.846	15.203	13.964	17.625	19.575	20.132	23.379	16.851	14.087	15.434	16.827	19.741	17.97	28.254	29.128	37.825	29.106
466	19.663	18.27	16.183	14.923	12.852	15.276	13.931	17.632	19.524	20.05	23.318	16.952	14.196	15.38	16.807	19.68	17.976	27.955	28.744	37.911	29.247
466.5	19.586	18.253	16.208	14.971	12.847	15.301	13.935	17.685	19.494	19.995	23.352	17.056	14.293	15.347	16.764	19.548	17.876	27.879	28.773	38.158	29.358
467	19.463	18.193	16.198	15.052	12.877	15.339	13.913	17.705	19.509	20.097	23.394	17.021	14.275	15.261	16.686	19.388	17.706	28.245	29.042	38.253	29.474
467.5	19.431	18.243	16.171	15.152	12.886	15.391	13.939	17.566	19.49	20.098	23.423	16.914	14.173	15.177	16.627	19.289	17.487	28.501	29.355	38.318	29.65
468	19.345	18.235	16.072	15.155	12.917	15.398	13.902	17.537	19.481	20.09	23.471	16.882	14.136	15.17	16.7	19.174	17.353	28.524	29.824	38.29	29.529
468.5	19.368	18.337	15.999	15.126	12.96	15.385	13.858	17.628	19.557	20.096	23.533	16.869	14.16	15.165	16.843	19.186	17.402	28.59	29.699	38.198	29.528
469	19.419	18.446	15.98	15.089	12.977	15.364	13.871	17.807	19.559	20.17	23.602	16.883	14.2	15.155	16.88	19.242	17.499	28.396	29.65	38.301	29.59
469.5	19.412	18.515	16.021	15.065	12.959	15.289	13.827	17.96	19.623	20.219	23.626	16.819	14.122	15.077	16.795	19.319	17.526	28.278	29.661	38.28	29.608
470	19.266	18.476	16.074	15.091	12.943	15.233	13.811	17.936	19.617	20.162	23.504	16.771	14.042	15.056	16.662	19.448	17.55	27.747	29.691	38.295	29.603
470.5	19.16	18.383	16.095	15.089	12.948	15.217	13.806	17.843	19.52	20.047	23.374	16.719	13.974	15.07	16.537	19.489	17.485	27.106	29.532	38.279	29.513
471	19.135	18.278	16.111	15.027	12.987	15.288	13.824	17.717	19.463	20.07	23.35	16.627	13.972	15.11	16.544	19.476	17.46	26.882	29.366	38.259	29.302
471.5	19.132	18.172	16.163	14.933	13.027	15.426	13.854	17.715	19.364	20.129	23.326	16.581	14.068	15.146	16.612	19.413	17.495	26.998	28.971	38.218	29.067
472	19.1	18.15	16.173	14.839	13.037	15.501	13.89	17.832	19.427	20.282	23.456	16.557	14.053	15.088	16.652	19.334	17.49	27.435	28.528	38.253	28.901
472.5	19.093	18.144	16.126	14.847	12.987	15.46	13.964	17.993	19.58	20.321	23.522	16.617	14.058	15.121	16.779	19.311	17.558	27.685	28.52	38.215	28.723
473	19.115	18.212	16.018	14.844	12.935	15.358	14.02	18.135	19.651	20.319	23.604	16.702	14.035	15.131	16.885	19.362	17.62	27.677	28.488	38.06	28.719
473.5	19.184	18.255	15.968	14.816	12.934	15.255	14.013	18.058	19.638	20.221	23.553	16.757	14.056	15.19	16.83	19.476	17.682	27.675	28.758	37.99	28.786
474	19.141	18.293	15.985	14.825	12.976	15.195	13.927	17.962	19.625	20.076	23.41	16.821	14.129	15.256	16.77	19.537	17.735	27.691	28.826	37.968	29.103
474.5	19.05	18.309	16.043	14.864	13.018	15.185	13.83	17.843	19.673	19.899	23.378	16.852	14.185	15.3	16.627	19.597	17.827	27.944	28.781	38.017	29.441
475	18.99	18.354	16.123	14.949	13.058	15.232	13.77	17.808	19.759	19.809	23.422	16.867	14.192	15.377	16.603	19.606	17.869	28.255	28.923	37.965	29.515
475.5	18.912	18.318	16.202	15.006	13.064	15.284	13.718	17.856	19.746	19.734	23.536	16.858	14.166	15.396	16.726	19.556	17.821	28.435	29.267	37.849	29.345
476	18.885	18.245	16.251	15.044	13.037	15.313	13.72	17.904	19.627	19.843	23.605	16.819	14.131	15.334	16.77	19.419	17.756	28.447	29.792	37.729	28.947
476.5	18.956	18.223	16.296	15.076	13.028	15.327	13.804	17.943	19.497	20.037	23.526	16.805	14.083	15.306	16.81	19.229	17.655	27.985	29.836	37.783	28.947
477	19.135	18.218	16.301	15.128	13.014	15.347	13.892	17.954	19.481	20.264	23.567	16.754	14.116	15.266	16.741	19.175	17.636	27.536	29.676	37.963	29.188
477.5	19.303	18.274	16.323	15.157	13.028	15.358	13.931	17.954	19.471	20.371	23.617	16.739	14.171	15.209	16.657	19.202	17.659	27.358	29.336	38.155	29.322
478	19.314	18.301	16.403	15.133	13.096	15.382	13.869	17.954	19.429	20.325	23.709	16.745	14.26	15.156	16.591	19.27	17.695	27.765	29.332	38.251	29.356
478.5	19.216	18.289	16.487	15.074	13.176	15.385	13.8	18.016	19.421	20.284	23.696	16.724	14.316	15.143	16.583	19.281	17.724	28.365	29.486	38.185	29.114
479	19.121	18.281	16.544	15	13.222	15.401	13.765	17.998	19.41	20.317	23.658	16.672	14.291	15.167	16.56	19.246	17.723	28.486	29.489	38.005	29.032
479.5	19.12	18.216	16.554	14.954	13.209	15.398	13.721	18.011	19.487	20.44	23.666	16.626	14.267	15.244	16.548	19.234	17.703	28.265	29.353	37.909	28.976
480	19.109	18.192	16.535	14.921	13.126	15.34	13.732	17.95	19.49	20.546	23.827	16.615	14.217	15.234	16.531	19.23	17.648	27.875	29.157	37.882	28.866
480.5	19.209	18.246	16.49	14.921	13.094	15.349	13.765	17.913	19.443	20.435	23.987	16.648	14.189	15.187	16.504	19.278	17.657	27.809	29.073	38.001	28.82
481	19.273	18.293	16.472	14.91	13.129	15.381	13.782	18.009	19.439	20.317	24	16.693	14.182	15.205	16.536	19.295	17.61	28.172	29.06	38.122	28.704
481.5	19.278	18.408	16.439	14.892	13.221	15.456	13.75	18.159	19.474	20.219	23.885	16.717	14.187	15.216	16.61	19.26	17.516	28.031	29.233	38.142	28.723
482	19.191	18.401	16.407	14.905	13.274	15.528	13.708	18.367	19.563	20.251	23.723	16.703	14.213	15.224	16.706	19.207	17.388	27.92	29.526	38.069	28.664
482.5	19.007	18.412	16.33	14.903	13.264	15.5	13.72	18.499	19.528	20.394	23.82	16.658	14.22	15.199	16.799	19.233	17.339	27.53	29.731	37.887	28.499
483	18.874	18.478	16.208	14.895	13.217	15.471	13.798	18.47	19.418	20.462	23.948	16.613	14.177	15.222	16.794	19.34	17.343	27.405	29.905	37.786	28.355
483.5	18.837	18.513	16.135	14.846	13.231	15.45	13.885	18.368	19.292	20.486	24.07	16.592	14.127	15.332	16.737	19.386	17.407	27.581	29.885	37.89	28.155
484	18.844	18.444	16.122	14.804	13.23	15.481	13.904	18.193	19.24	20.503	24.016	16.597	14.103	15.496	16.699	19.362	17.557	27.838	29.911	37.997	28.018
484.5	18.947	18.338	16.151	14.812	13.179	15.504	13.923	18.116	19.364	20.508	23.988	16.616	14.103	15.581	16.618	19.292	17.698	27.952	30.249	38.09	28.149
485	19.057	18.218	16.188	14.848	13.121	15.514	13.928	18.175	19.487	20.521	23.96	16.62	14.101	15.522	16.632	19.328	17.764	27.772	30.36	38.081	28.456
485.5	19.121	18.184	16.173	14.891	13.098	15.56	13.969	18.319	19.612	20.484	24.03	16.669	14.144	15.414	16.633	19.362	17.747	27.587	30.253	37.986	29.017
486	19.16	18.269	16.135	14.916	13.14	15.566	13.992	18.402	19.629	20.397	24.083	16.747	14.186	15.33	16.631	19.298	17.669	27.819	29.921	37.996	29.326
486.5	19.106	18.28	16.124	14.919	13.19	15.606	14	18.402	19.633	20.324	24.159	16.794	14.204	15.355	16.618	19.21	17.662	28.18	29.515	38	29.26
487	19.069	18.244	16.167	14.93	13.175	15.582	14.002	18.374	19.674	20.335	24.241	16.78	14.228	15.39	16.609	19.14	17.729	28.574	29.591	38.073	29.082
487.5	19.042	18.236	16.196	14.918	13.138	15.547	14.02	18.278	19.679	20.396	24.249	16.71	14.211	15.412	16.628	19.163	17.742	28.696	29.867	38.155	28.931
488	18.971	18.287	16.206	14.927	13.129	15.561	14.071	18.257	19.663	20.461	24.35	16.673	14.224	15.416	16.709	19.203	17.634	28.745	30.107	38.266	29.095
488.5	18.922	18.353	16.221	14.923	13.138	15.613	14.087	18.266	19.64	20.538	24.366	16.66	14.225	15.368	16.754	19.225	17.547	28.92	30.19	38.419	29.203
489	18.923	18.435	16.246	14.924	13.174	15.697	14.088	18.317	19.652	20.558	24.44	16.622	14.198	15.301	16.745	19.23	17.48	29.02	30.195	38.611	29.407
489.5	18.932	18.426	16.255	14.916	13.182	15.712	14.031	18.38	19.681	20.624	24.464	16.578	14.144	15.213	16.727	19.215	17.578	28.993	30.049	38.774	29.424
490	18.897	18.352	16.195	14.925	13.129	15.642	13.959	18.387	19.675	20.671	24.417	16.549	14.08	15.164	16.703	19.2	17.702	28.704	29.991	38.692	29.212
490.5	18.801	18.313	16.13	14.976	13.098	15.555	13.955	18.366	19.677	20.66	24.474	16.621	14.071	15.195	16.697	19.219	17.768	28.434	30.074	38.559	29.031
491	18.74	18.293	16.128	15.015	13.069	15.495	14.025	18.423	19.662	20.642	24.541	16.68	14.097	15.204	16.745	19.247	17.769	28.281	30.107	38.361	28.739
491.5	18.794	18.368	16.182	15.018	13.114	15.535	14.147	18.573	19.72	20.57	24.593	16.78	14.186	15.281	16.799	19.269	17.684	28.362	30.095	38.401	28.674
492	18.931	18.495	16.242	15.012	13.136	15.581	14.245	18.718	19.81	20.55	24.737	16.813	14.248	15.31	16.82	19.231	17.538	28.555	29.907	38.517	28.738
492.5	19.043	18.639	16.293	15.039	13.109	15.641	14.218	18.842	19.853	20.539	24.771	16.83	14.304	15.335	16.814	19.155	17.459	28.54	29.786	38.601	28.824
493	19.02	18.711	16.293	15.07	13.087	15.673	14.168	18.87	19.881	20.563	24.847	16.847	14.314	15.352	16.786	19.154	17.455	28.379	29.741	38.642	29.018
493.5	18.951	18.718	16.308	15.065	13.093	15.692	14.122	18.893	19.843	20.591	24.838	16.89	14.288	15.325	16.793	19.158	17.562	28.23	29.822	38.635	29.147
494	18.925	18.648	16.32	15.053	13.112	15.72	14.119	18.966	19.843	20.635	24.759	16.953	14.267	15.341	16.801	19.256	17.715	28.252	29.915	38.747	29.152
494.5	18.993	18.515	16.302	15.064	13.188	15.745	14.169	19.001	19.874	20.651	24.708	17.005	14.172	15.332	16.773	19.317	17.803	28.46	29.991	38.896	29.093
495	19.134	18.523	16.278	15.101	13.306	15.813	14.194	19.1	19.929	20.668	24.817	16.977	14.162	15.308	16.735	19.4	17.834	28.513	30.023	38.958	28.984
495.5	19.254	18.557	16.269	15.137	13.439	15.884	14.197	19.176	20.061	20.684	25.011	16.922	14.153	15.302	16.705	19.45	17.845	28.689	30.261	38.991	28.864
496	19.219	18.644	16.321	15.152	13.489	15.937	14.208	19.31	20.223	20.778	25.217	16.863	14.188	15.345	16.696	19.433	17.786	28.7	30.433	39.002	28.769
496.5	19.169	18.673	16.403	15.185	13.462	16.022	14.229	19.431	20.365	20.838	25.28	16.871	14.243	15.434	16.727	19.403	17.698	28.712	30.697	39.028	28.839
497	19.109	18.647	16.437	15.217	13.403	16.048	14.325	19.495	20.452	20.935	25.368	16.899	14.269	15.469	16.831	19.39	17.675	28.694	30.807	39.118	29.033
497.5	19.09	18.651	16.453	15.241	13.37	16.061	14.38	19.507	20.442	20.932	25.443	16.943	14.282	15.484	16.928	19.415	17.7	28.68	30.775	39.153	29.302
498	19.17	18.616	16.464	15.263	13.4	16.057	14.412	19.574	20.496	20.903	25.574	16.983	14.287	15.446	16.95	19.482	17.848	28.865	30.745	39.262	29.306
498.5	19.186	18.635	16.503	15.296	13.421	16.029	14.412	19.68	20.58	20.874	25.615	16.96	14.237	15.418	16.937	19.421	17.902	28.986	30.58	39.309	29.062
499	19.152	18.535	16.451	15.354	13.418	16.06	14.429	19.834	20.675	20.887	25.57	16.988	14.246	15.468	16.938	19.385	17.907	28.914	30.453	39.253	28.78
499.5	19.159	18.533	16.408	15.441	13.38	16.13	14.435	19.983	20.788	20.939	25.594	16.959	14.242	15.463	16.929	19.335	17.821	28.847	30.384	39.242	28.458
500	19.185	18.501	16.393	15.498	13.335	16.25	14.493	20.091	20.829	21.013	25.675	16.896	14.317	15.476	16.922	19.354	17.762	28.829	30.552	39.309	28.492
500.5	19.233	18.53	16.416	15.534	13.304	16.365	14.557	20.261	20.887	21.1	25.775	16.885	14.411	15.464	16.914	19.374	17.756	28.763	30.726	39.377	28.648
501	19.228	18.547	16.463	15.557	13.296	16.401	14.646	20.394	20.902	21.185	25.906	16.886	14.473	15.482	16.966	19.311	17.767	28.666	30.644	39.379	28.743
501.5	19.156	18.521	16.478	15.566	13.297	16.383	14.739	20.505	20.947	21.273	25.991	16.876	14.472	15.504	17.037	19.293	17.819	28.574	30.627	39.241	28.806
502	19.153	18.498	16.51	15.617	13.299	16.394	14.771	20.596	21.048	21.305	26.112	16.884	14.375	15.49	17.069	19.315	17.866	28.792	30.611	39.199	28.702
502.5	19.219	18.438	16.545	15.695	13.3	16.47	14.807	20.694	21.23	21.353	26.281	16.945	14.341	15.525	17.11	19.374	17.962	29.056	30.658	39.298	28.8
503	19.241	18.459	16.564	15.797	13.334	16.569	14.84	20.898	21.467	21.419	26.515	17.073	14.349	15.548	17.133	19.406	18.059	29.121	30.663	39.437	29.015
503.5	19.202	18.509	16.599	15.924	13.391	16.685	14.885	21.162	21.665	21.509	26.758	17.226	14.447	15.592	17.179	19.405	18.109	28.989	30.548	39.571	29.28
504	19.151	18.583	16.626	16.039	13.467	16.764	14.98	21.412	21.816	21.58	26.901	17.296	14.542	15.599	17.212	19.429	18.12	29.048	30.641	39.673	29.487
504.5	19.16	18.673	16.614	16.117	13.535	16.816	15.042	21.609	21.908	21.593	26.949	17.343	14.591	15.587	17.244	19.437	18.053	29.364	30.684	39.709	29.521
505	19.247	18.683	16.624	16.151	13.593	16.858	15.073	21.692	21.96	21.546	26.999	17.405	14.665	15.604	17.307	19.486	18.048	29.7	30.864	39.855	29.522
505.5	19.313	18.762	16.609	16.168	13.633	16.891	15.112	21.809	22.03	21.51	27.15	17.483	14.704	15.669	17.35	19.504	18.103	29.847	30.787	39.879	29.391
506	19.345	18.779	16.634	16.193	13.706	16.959	15.169	21.974	22.155	21.521	27.391	17.483	14.744	15.744	17.363	19.566	18.16	29.803	30.786	39.887	29.212
506.5	19.372	18.836	16.693	16.318	13.745	17.04	15.259	22.217	22.288	21.621	27.68	17.556	14.789	15.809	17.4	19.612	18.242	29.743	30.757	39.907	29.108
507	19.426	18.802	16.719	16.453	13.782	17.097	15.37	22.461	22.474	21.784	27.86	17.612	14.759	15.823	17.441	19.59	18.215	29.771	30.742	39.997	29.168
507.5	19.496	18.749	16.75	16.599	13.702	17.164	15.449	22.67	22.646	21.914	28.007	17.74	14.744	15.805	17.545	19.545	18.146	29.633	30.786	40.043	29.139
508	19.616	18.681	16.768	16.723	13.637	17.249	15.557	22.848	22.804	22.005	28.057	17.867	14.779	15.823	17.667	19.522	18.052	29.669	30.914	40.093	29.039
508.5	19.722	18.676	16.841	16.858	13.619	17.378	15.631	23.069	23.028	22.071	28.264	17.893	14.826	15.834	17.717	19.575	18.083	29.855	31.218	40.038	28.89
509	19.853	18.753	16.924	17.012	13.648	17.525	15.671	23.25	23.209	22.144	28.512	17.879	14.907	15.856	17.781	19.655	18.189	30.091	31.699	40.084	28.89
509.5	19.954	18.855	16.978	17.178	13.725	17.637	15.668	23.463	23.328	22.258	28.719	17.86	14.926	15.868	17.822	19.722	18.313	30.18	31.943	40.137	29.041
510	19.971	18.858	17.033	17.342	13.799	17.753	15.673	23.708	23.438	22.443	28.968	17.882	14.951	15.884	17.929	19.748	18.355	30.175	32.196	40.187	29.17
510.5	19.941	18.856	17.143	17.499	13.847	17.867	15.752	23.918	23.564	22.594	29.202	17.956	15.025	15.979	18.032	19.77	18.362	30.252	32.215	40.167	29.061
511	19.963	18.883	17.246	17.65	13.833	17.965	15.891	24.134	23.776	22.719	29.526	18.05	15.125	16.098	18.07	19.768	18.395	30.373	32.088	40.253	29.029
511.5	19.955	18.952	17.304	17.789	13.806	18.065	16.104	24.331	24.064	22.75	29.847	18.109	15.205	16.263	18.083	19.743	18.45	30.492	31.819	40.336	29.068
512	20.073	19.082	17.305	17.905	13.824	18.209	16.269	24.624	24.306	22.769	30.142	18.199	15.279	16.402	18.087	19.783	18.529	30.458	31.55	40.505	29.14
512.5	20.115	19.104	17.323	18.038	13.879	18.354	16.368	24.961	24.538	22.841	30.425	18.259	15.352	16.46	18.173	19.905	18.544	30.582	31.609	40.692	29.339
513	20.236	19.181	17.417	18.209	13.951	18.516	16.403	25.224	24.691	22.912	30.637	18.352	15.42	16.469	18.28	20.058	18.573	30.858	31.871	40.726	29.328
513.5	20.334	19.239	17.51	18.42	14.01	18.667	16.456	25.46	24.841	23.057	30.835	18.488	15.461	16.468	18.398	20.234	18.597	31.041	32.068	40.737	29.473
514	20.365	19.297	17.599	18.607	14.062	18.842	16.566	25.676	25.065	23.205	31.041	18.614	15.541	16.547	18.466	20.322	18.636	31.214	32.266	40.648	29.445
514.5	20.353	19.347	17.676	18.727	14.122	19.036	16.691	26.005	25.304	23.394	31.321	18.741	15.635	16.65	18.55	20.423	18.717	31.267	32.528	40.81	29.399
515	20.334	19.349	17.743	18.83	14.164	19.21	16.784	26.365	25.58	23.573	31.654	18.809	15.757	16.786	18.675	20.495	18.803	31.477	33.044	41.086	29.361
515.5	20.415	19.35	17.833	18.991	14.174	19.364	16.807	26.685	25.764	23.7	31.979	18.893	15.869	16.921	18.805	20.527	18.88	31.693	33.457	41.53	29.201
516	20.631	19.382	17.906	19.243	14.155	19.548	16.858	26.916	25.939	23.746	32.373	18.955	15.926	17.042	18.924	20.585	18.99	31.98	33.554	41.801	29.318
516.5	20.868	19.406	17.99	19.504	14.164	19.743	16.981	27.148	26.106	23.813	32.785	18.953	15.991	17.091	18.998	20.621	19.049	32.332	33.47	41.925	29.334
517	21.085	19.517	18.073	19.706	14.22	19.91	17.164	27.419	26.324	23.948	33.219	18.94	16.057	17.14	19.068	20.726	19.173	32.541	33.396	41.997	29.533
517.5	21.144	19.581	18.15	19.899	14.296	20.092	17.337	27.725	26.571	24.063	33.596	18.973	16.158	17.172	19.204	20.838	19.223	32.525	33.503	41.93	29.707
518	21.162	19.665	18.226	20.133	14.365	20.243	17.469	28.081	26.816	24.195	33.886	19.126	16.243	17.286	19.349	20.973	19.316	32.339	33.765	41.999	29.925
518.5	21.153	19.743	18.288	20.386	14.39	20.436	17.558	28.394	27.065	24.291	34.116	19.333	16.325	17.371	19.513	21.105	19.429	32.241	34.014	42.065	30.081
519	21.212	19.761	18.322	20.625	14.425	20.641	17.706	28.623	27.305	24.448	34.391	19.529	16.456	17.459	19.63	21.202	19.497	32.412	34.009	42.223	30.004
519.5	21.35	19.848	18.336	20.874	14.502	20.811	17.821	28.881	27.563	24.676	34.68	19.721	16.602	17.578	19.774	21.281	19.66	32.693	33.916	42.471	29.826
520	21.454	19.841	18.411	21.121	14.604	20.96	17.877	29.064	27.833	24.831	35.062	19.85	16.803	17.703	19.922	21.393	19.736	32.961	33.903	42.599	29.771
520.5	21.599	19.849	18.511	21.359	14.692	21.083	17.948	29.384	28.08	24.995	35.409	19.959	16.933	17.851	20.093	21.493	19.826	33.077	33.954	42.675	29.871
521	21.629	19.894	18.691	21.599	14.783	21.242	18.049	29.682	28.299	25.148	35.663	20.103	17.051	18.023	20.248	21.634	19.909	33.03	34.26	42.8	30.034
521.5	21.652	19.938	18.87	21.797	14.856	21.416	18.185	29.962	28.512	25.253	35.863	20.264	17.109	18.176	20.334	21.758	19.987	32.98	34.311	43.015	30.229
522	21.726	20.018	19.023	21.989	15.006	21.661	18.289	30.231	28.648	25.332	36.075	20.469	17.24	18.293	20.455	21.805	20.125	33.065	34.504	43.285	30.322
522.5	21.881	20.076	19.136	22.163	15.138	21.903	18.327	30.495	28.861	25.401	36.348	20.583	17.359	18.314	20.635	21.84	20.195	33.195	34.638	43.394	30.356
523	22.113	20.118	19.219	22.32	15.186	22.107	18.344	30.787	29.028	25.577	36.68	20.693	17.493	18.355	20.88	21.88	20.282	33.371	34.923	43.419	30.242
523.5	22.303	20.253	19.316	22.494	15.208	22.245	18.438	31.086	29.337	25.8	36.96	20.786	17.641	18.469	21.084	22.005	20.38	33.401	35.136	43.428	30.008
524	22.417	20.416	19.4	22.754	15.151	22.268	18.608	31.285	29.648	25.956	37.154	20.921	17.774	18.665	21.209	22.206	20.492	33.501	35.057	43.498	30.027
524.5	22.479	20.5	19.487	23.062	15.112	22.296	18.785	31.443	29.941	26.036	37.318	20.979	17.887	18.871	21.32	22.371	20.582	33.716	34.976	43.65	30.083
525	22.557	20.541	19.541	23.359	15.164	22.473	18.932	31.685	30.204	26.118	37.528	21.015	17.99	18.99	21.486	22.533	20.605	33.786	34.862	43.819	30.337
525.5	22.652	20.451	19.599	23.604	15.239	22.709	19.001	31.973	30.308	26.19	37.806	21.112	18.059	19.065	21.659	22.652	20.647	33.89	34.744	44.105	30.368
526	22.763	20.5	19.708	23.735	15.328	22.971	19.002	32.337	30.426	26.379	38.208	21.256	18.198	19.123	21.794	22.784	20.755	33.736	34.515	44.339	30.288
526.5	22.859	20.524	19.813	23.854	15.392	23.177	18.996	32.614	30.507	26.549	38.568	21.384	18.378	19.219	21.92	22.906	20.889	33.801	34.414	44.434	30.144
527	22.887	20.606	19.906	24.019	15.444	23.343	19.026	32.846	30.601	26.704	38.797	21.441	18.562	19.322	22.051	23.075	21.045	33.921	34.412	44.464	30.106
527.5	22.876	20.646	19.984	24.191	15.51	23.529	19.071	33.027	30.762	26.844	39.051	21.421	18.673	19.393	22.149	23.255	21.212	34.025	34.685	44.455	30.364
528	22.973	20.698	20.057	24.394	15.579	23.732	19.155	33.149	31.004	26.905	39.264	21.521	18.723	19.444	22.227	23.356	21.324	34.17	34.901	44.435	30.744
528.5	23.128	20.783	20.137	24.625	15.675	23.947	19.225	33.276	31.315	27.041	39.581	21.636	18.778	19.507	22.277	23.428	21.423	34.261	35.245	44.456	30.985
529	23.285	20.816	20.221	24.86	15.765	24.117	19.312	33.422	31.564	27.143	39.778	21.802	18.881	19.657	22.416	23.483	21.416	34.59	35.62	44.478	30.941
529.5	23.346	20.859	20.284	25.051	15.88	24.236	19.421	33.611	31.719	27.258	39.933	21.929	19.025	19.817	22.562	23.594	21.465	34.808	35.772	44.538	30.979
530	23.364	20.866	20.329	25.164	15.946	24.303	19.52	33.723	31.781	27.328	40.064	22.044	19.123	19.985	22.691	23.665	21.516	34.928	35.612	44.727	31.241
530.5	23.406	20.951	20.391	25.235	16.026	24.365	19.547	33.851	31.928	27.431	40.244	22.21	19.245	20.139	22.857	23.62	21.593	34.946	35.253	44.918	31.671
531	23.393	21.01	20.494	25.353	16.088	24.461	19.532	34.011	32.083	27.514	40.397	22.278	19.326	20.211	22.991	23.678	21.655	34.978	35.215	45.156	31.895
531.5	23.406	21.01	20.627	25.506	16.134	24.581	19.495	34.271	32.261	27.588	40.525	22.287	19.437	20.251	23.127	23.782	21.699	35.025	35.401	45.347	31.703
532	23.39	20.952	20.708	25.674	16.075	24.66	19.486	34.441	32.34	27.581	40.717	22.218	19.508	20.3	23.176	23.891	21.773	34.922	35.663	45.354	31.365
532.5	23.58	20.957	20.722	25.835	16.025	24.766	19.495	34.518	32.39	27.628	40.83	22.213	19.586	20.32	23.202	23.981	21.9	35.067	35.778	45.388	31.028
533	23.78	21.046	20.694	25.948	16.013	24.886	19.6	34.567	32.534	27.711	40.993	22.288	19.673	20.371	23.218	23.988	22.03	35.273	35.797	45.353	30.954
533.5	23.888	21.139	20.727	26.024	16.06	25.02	19.72	34.666	32.775	27.771	41.185	22.316	19.754	20.419	23.249	24.079	22.128	35.626	35.773	45.302	30.92
534	23.904	21.196	20.913	26.102	16.144	25.147	19.86	34.821	33.001	27.872	41.425	22.369	19.885	20.57	23.303	24.203	22.086	35.642	35.639	45.333	30.835
534.5	23.863	21.24	21.099	26.177	16.196	25.257	19.951	34.992	33.128	27.941	41.721	22.425	20.001	20.756	23.437	24.299	22.059	35.548	35.597	45.423	30.542
535	23.867	21.287	21.15	26.263	16.231	25.374	19.956	35.11	33.165	28.022	41.786	22.534	20.047	20.937	23.564	24.334	22.003	35.283	35.532	45.573	30.47
535.5	23.907	21.332	21.104	26.339	16.272	25.491	19.905	35.192	33.135	28.108	41.753	22.547	20.079	20.976	23.643	24.359	22.049	35.211	35.589	45.606	30.605
536	23.873	21.299	21.011	26.399	16.348	25.609	19.834	35.279	33.174	28.188	41.654	22.578	20.13	20.945	23.662	24.4	22.126	35.168	35.593	45.626	31.002
536.5	23.905	21.237	20.961	26.474	16.433	25.675	19.813	35.37	33.229	28.271	41.588	22.591	20.166	20.876	23.655	24.483	22.259	35.367	35.475	45.626	31.192
537	24.018	21.191	20.968	26.559	16.464	25.691	19.839	35.499	33.405	28.289	41.624	22.682	20.244	20.912	23.771	24.573	22.432	35.559	35.423	45.713	31.318
537.5	24.15	21.174	21.015	26.629	16.508	25.671	19.923	35.64	33.577	28.209	41.724	22.724	20.257	20.966	23.816	24.601	22.516	35.747	35.523	45.811	31.436
538	24.217	21.283	21.083	26.703	16.543	25.657	19.951	35.748	33.627	28.187	41.827	22.719	20.323	21.036	23.869	24.628	22.522	35.672	35.784	45.899	31.608
538.5	24.174	21.415	21.116	26.737	16.597	25.665	19.991	35.78	33.633	28.199	41.859	22.706	20.42	21.025	23.944	24.646	22.539	35.354	36.092	45.875	31.607
539	24.147	21.494	21.116	26.775	16.572	25.73	20.067	35.745	33.633	28.308	41.898	22.72	20.478	21.036	24.032	24.662	22.596	35.04	36.351	45.829	31.263
539.5	24.157	21.508	21.161	26.802	16.541	25.79	20.134	35.613	33.619	28.282	42.047	22.746	20.49	21.011	24.12	24.659	22.659	34.524	36.354	45.818	30.98
540	24.227	21.515	21.239	26.783	16.512	25.839	20.228	35.605	33.653	28.333	42.283	22.712	20.443	21.033	24.177	24.687	22.611	34.426	36.107	45.925	30.949
540.5	24.288	21.528	21.305	26.825	16.511	25.831	20.264	35.671	33.636	28.332	42.493	22.677	20.377	21.078	24.222	24.762	22.575	34.652	35.937	45.999	31.044
541	24.313	21.538	21.287	26.911	16.538	25.852	20.246	35.791	33.689	28.436	42.507	22.584	20.364	21.099	24.272	24.828	22.554	35.392	35.92	45.995	31.129
541.5	24.388	21.569	21.243	27.031	16.574	25.904	20.191	35.85	33.725	28.489	42.481	22.506	20.381	21.097	24.191	24.87	22.595	36.14	36.303	45.925	31.285
542	24.401	21.55	21.278	27.125	16.56	25.98	20.143	35.861	33.796	28.499	42.461	22.508	20.365	21.029	24.089	24.805	22.588	36.367	36.717	45.902	31.567
542.5	24.369	21.534	21.314	27.201	16.563	26.047	20.19	35.877	33.827	28.461	42.424	22.495	20.384	21.059	24.041	24.756	22.574	36.07	36.875	45.906	31.774
543	24.309	21.463	21.351	27.226	16.568	26.072	20.262	35.937	33.882	28.493	42.431	22.578	20.367	21.161	24.129	24.768	22.583	35.485	36.703	45.945	31.814
543.5	24.279	21.434	21.374	27.23	16.593	26.099	20.314	36.032	33.913	28.551	42.47	22.631	20.399	21.282	24.261	24.803	22.55	35.018	36.275	45.996	31.528
544	24.348	21.465	21.427	27.178	16.622	26.098	20.276	36.129	33.98	28.641	42.665	22.689	20.442	21.322	24.307	24.876	22.595	35.053	35.943	46.071	31.321
544.5	24.474	21.591	21.441	27.138	16.616	26.087	20.26	36.231	34.061	28.64	42.843	22.74	20.485	21.409	24.327	24.896	22.641	35.262	35.874	46.164	31.179
545	24.485	21.627	21.451	27.22	16.635	26.134	20.253	36.332	34.113	28.615	42.993	22.77	20.548	21.507	24.264	24.837	22.66	35.557	35.918	46.139	31.105
545.5	24.518	21.655	21.479	27.381	16.642	26.207	20.236	36.331	34.196	28.576	43.027	22.817	20.592	21.573	24.205	24.84	22.688	35.599	36.15	46.252	31.099
546	24.473	21.595	21.55	27.558	16.653	26.33	20.241	36.277	34.244	28.584	42.975	22.877	20.628	21.575	24.128	24.807	22.719	35.725	36.404	46.12	31.081
546.5	24.466	21.555	21.632	27.646	16.623	26.402	20.275	36.201	34.29	28.594	42.97	22.92	20.717	21.538	24.164	24.826	22.764	35.975	36.651	46.07	31.118
547	24.521	21.691	21.684	27.612	16.625	26.456	20.383	36.252	34.296	28.639	43.03	22.937	20.79	21.48	24.236	24.852	22.854	35.998	36.69	46.09	31.161
547.5	24.59	21.84	21.684	27.541	16.64	26.491	20.458	36.33	34.27	28.698	43.107	22.919	20.88	21.486	24.395	24.924	22.851	35.91	36.588	46.119	31.242
548	24.63	21.828	21.665	27.519	16.681	26.536	20.5	36.404	34.236	28.755	43.128	22.919	20.855	21.41	24.449	24.95	22.847	36.022	36.649	46.288	31.375
548.5	24.597	21.705	21.655	27.542	16.741	26.573	20.515	36.436	34.231	28.766	43.073	22.932	20.803	21.428	24.471	24.976	22.859	36.208	36.601	46.349	31.466
549	24.485	21.551	21.669	27.589	16.809	26.588	20.514	36.444	34.363	28.79	43.045	22.948	20.762	21.401	24.434	25.037	22.866	36.392	36.487	46.409	31.478
549.5	24.478	21.581	21.742	27.603	16.858	26.589	20.557	36.48	34.487	28.802	43.027	22.945	20.76	21.412	24.365	25.14	22.894	36.201	36.315	46.486	31.421
550	24.523	21.643	21.767	27.596	16.847	26.57	20.642	36.505	34.568	28.897	43.026	22.932	20.779	21.407	24.304	25.273	22.907	35.978	36.216	46.514	31.433
550.5	24.586	21.588	21.776	27.604	16.784	26.551	20.756	36.53	34.5	28.975	42.988	22.965	20.763	21.413	24.307	25.27	22.899	36.045	36.449	46.509	31.439
551	24.602	21.472	21.769	27.642	16.71	26.526	20.822	36.543	34.413	29.012	43.027	23.043	20.722	21.487	24.344	25.2	22.906	36.09	36.55	46.444	31.523
551.5	24.609	21.414	21.781	27.697	16.751	26.617	20.826	36.634	34.442	28.922	43.167	23.147	20.79	21.557	24.485	25.142	22.934	35.97	36.465	46.342	31.601
552	24.611	21.53	21.774	27.726	16.821	26.747	20.753	36.686	34.524	28.82	43.335	23.154	20.819	21.612	24.581	25.111	22.948	35.611	36.504	46.307	31.621
552.5	24.577	21.705	21.719	27.651	16.852	26.824	20.654	36.675	34.55	28.735	43.441	23.165	20.893	21.598	24.674	25.134	22.97	35.344	36.612	46.248	31.532
553	24.553	21.81	21.702	27.549	16.853	26.849	20.586	36.617	34.492	28.72	43.359	23.129	20.885	21.582	24.713	25.08	22.952	35.26	36.858	46.279	31.406
553.5	24.592	21.804	21.723	27.486	16.86	26.706	20.661	36.528	34.445	28.763	43.208	23.164	20.881	21.614	24.652	24.984	22.863	35.47	36.945	46.316	31.326
554	24.607	21.731	21.687	27.474	16.87	26.603	20.779	36.531	34.418	28.822	43.096	23.14	20.846	21.638	24.54	24.856	22.709	35.585	36.869	46.369	31.457
554.5	24.586	21.662	21.657	27.519	16.895	26.587	20.831	36.633	34.424	28.904	43.11	23.051	20.822	21.607	24.509	24.805	22.67	35.62	36.96	46.421	31.592
555	24.505	21.653	21.639	27.523	16.881	26.604	20.83	36.653	34.389	28.846	43.189	22.995	20.813	21.548	24.493	24.853	22.73	35.641	37.025	46.423	31.754
555.5	24.462	21.627	21.686	27.47	16.846	26.621	20.815	36.736	34.443	28.768	43.253	22.954	20.841	21.465	24.534	24.959	22.892	35.729	37.166	46.46	31.723
556	24.455	21.664	21.668	27.392	16.835	26.627	20.879	36.716	34.534	28.624	43.287	23.03	20.851	21.436	24.529	25.029	22.918	35.865	37.075	46.532	31.657
556.5	24.534	21.729	21.581	27.326	16.795	26.59	20.962	36.748	34.598	28.546	43.309	23.054	20.764	21.327	24.466	25.031	22.802	35.807	36.928	46.537	31.554
557	24.588	21.685	21.513	27.273	16.721	26.576	21.056	36.791	34.627	28.557	43.266	23.044	20.669	21.261	24.405	25	22.655	35.512	36.595	46.472	31.533
557.5	24.619	21.623	21.516	27.249	16.61	26.566	21.114	36.724	34.573	28.532	43.264	22.969	20.579	21.186	24.283	24.914	22.585	35.241	36.328	46.418	31.445
558	24.571	21.551	21.543	27.247	16.518	26.529	21.051	36.629	34.539	28.559	43.13	22.908	20.55	21.21	24.192	24.761	22.591	35.284	36.376	46.336	31.356
558.5	24.421	21.464	21.548	27.266	16.496	26.522	20.922	36.417	34.413	28.541	43.006	22.881	20.539	21.209	24.077	24.603	22.651	35.604	36.55	46.254	31.212
559	24.35	21.48	21.53	27.228	16.545	26.539	20.751	36.267	34.255	28.538	42.95	22.791	20.491	21.148	24.003	24.56	22.677	35.838	36.955	46.11	31.181
559.5	24.297	21.463	21.437	27.202	16.577	26.548	20.668	36.195	34.155	28.494	43.007	22.685	20.432	21.048	23.954	24.587	22.67	35.965	37.127	46.063	31.251
560	24.311	21.512	21.287	27.151	16.574	26.497	20.671	36.189	34.085	28.418	42.977	22.581	20.403	20.921	23.881	24.598	22.542	35.99	37.072	46.066	31.27
560.5	24.365	21.569	21.156	27.066	16.545	26.397	20.678	36.223	34.021	28.325	42.806	22.518	20.385	20.932	23.832	24.576	22.419	35.981	37.004	46.17	31.365
561	24.304	21.599	21.121	26.934	16.518	26.257	20.679	36.214	33.951	28.35	42.581	22.501	20.326	20.974	23.749	24.608	22.36	36.002	36.913	46.217	31.346
561.5	24.205	21.577	21.125	26.797	16.493	26.12	20.697	36.164	33.842	28.291	42.415	22.48	20.191	20.997	23.664	24.653	22.344	35.742	36.931	46.226	31.265
562	24.077	21.489	21.086	26.669	16.476	26.02	20.644	36.014	33.809	28.141	42.312	22.478	20.06	20.873	23.542	24.619	22.332	35.6	36.815	46.177	31.125
562.5	24.071	21.396	21.018	26.553	16.456	25.978	20.592	35.887	33.778	27.955	42.167	22.479	20.01	20.754	23.454	24.463	22.226	35.506	36.568	46.105	31.002
563	24.106	21.303	20.94	26.457	16.368	25.977	20.405	35.735	33.707	27.831	42.033	22.431	20.019	20.673	23.409	24.312	22.167	35.618	36.556	46.071	30.856
563.5	24.157	21.237	20.912	26.367	16.3	25.997	20.245	35.715	33.647	27.842	41.956	22.341	20.01	20.626	23.401	24.22	22.158	35.786	36.689	46.059	30.907
564	24.107	21.219	20.921	26.29	16.248	25.993	20.162	35.684	33.552	27.843	41.81	22.292	19.996	20.539	23.406	24.161	22.13	35.662	36.708	46.022	30.929
564.5	24.039	21.264	20.904	26.202	16.234	25.946	20.154	35.666	33.463	27.84	41.65	22.239	19.921	20.401	23.29	24.038	22.12	35.399	36.809	45.936	30.941
565	23.979	21.333	20.862	26.104	16.213	25.845	20.156	35.544	33.361	27.871	41.516	22.198	19.855	20.292	23.191	23.876	21.979	35.081	36.67	45.9	30.97
565.5	23.929	21.339	20.806	26.045	16.201	25.731	20.134	35.343	33.219	27.841	41.384	22.065	19.746	20.211	23.094	23.754	21.846	34.882	36.484	45.953	30.761
566	23.867	21.297	20.742	25.949	16.172	25.609	20.082	35.103	33.156	27.773	41.251	21.935	19.662	20.215	23.078	23.682	21.7	34.877	36.338	45.999	30.654
566.5	23.823	21.238	20.649	25.795	16.137	25.555	20.029	34.974	33.074	27.661	41.107	21.857	19.585	20.233	23.116	23.569	21.533	35.15	36.279	46.037	30.561
567	23.695	21.195	20.53	25.606	16.033	25.525	19.983	34.906	33.015	27.564	40.987	21.8	19.532	20.219	23.065	23.462	21.49	35.111	36.349	45.856	30.473
567.5	23.557	21.142	20.441	25.444	15.947	25.537	19.947	34.848	32.855	27.479	40.823	21.687	19.459	20.082	22.949	23.367	21.499	34.97	36.646	45.69	30.456
568	23.378	21.127	20.347	25.335	15.857	25.511	19.945	34.727	32.745	27.391	40.621	21.539	19.379	19.94	22.827	23.333	21.505	34.55	36.741	45.541	30.477
568.5	23.255	21.107	20.234	25.276	15.766	25.392	19.931	34.579	32.645	27.333	40.383	21.43	19.309	19.873	22.716	23.268	21.463	34.258	36.76	45.479	30.573
569	23.185	21.068	20.169	25.167	15.679	25.276	19.894	34.372	32.568	27.203	40.265	21.389	19.225	19.863	22.638	23.221	21.336	34.158	36.618	45.512	30.589
569.5	23.094	21.003	20.16	25.016	15.62	25.202	19.858	34.21	32.419	27.11	40.19	21.388	19.112	19.829	22.513	23.172	21.233	34.162	36.221	45.413	30.475
570	22.943	20.93	20.152	24.862	15.584	25.107	19.8	34.095	32.208	26.928	40.151	21.322	18.967	19.728	22.371	23.11	21.172	34.274	35.91	45.211	30.464
570.5	22.766	20.889	20.07	24.716	15.555	24.974	19.721	33.966	32.028	26.841	39.963	21.277	18.825	19.543	22.248	23.048	21.158	34.278	35.709	44.999	30.449
571	22.746	20.816	19.938	24.602	15.524	24.87	19.636	33.858	31.856	26.737	39.772	21.135	18.768	19.377	22.145	22.948	21.128	34.064	35.576	44.832	30.427
571.5	22.806	20.784	19.844	24.47	15.492	24.812	19.599	33.645	31.662	26.637	39.57	21.004	18.696	19.263	22.029	22.844	21.037	34.066	35.634	44.731	30.421
572	22.888	20.762	19.794	24.337	15.466	24.774	19.555	33.506	31.436	26.474	39.452	20.888	18.584	19.227	21.955	22.727	20.881	34.342	35.586	44.676	30.278
572.5	22.833	20.733	19.753	24.191	15.438	24.686	19.508	33.411	31.213	26.348	39.367	20.787	18.438	19.193	21.864	22.684	20.784	34.651	35.63	44.598	30.217
573	22.712	20.736	19.71	24.019	15.434	24.628	19.434	33.265	31.119	26.261	39.326	20.76	18.409	19.193	21.831	22.614	20.707	34.763	35.74	44.671	29.928
573.5	22.637	20.768	19.614	23.857	15.441	24.558	19.39	33.16	31.179	26.263	39.23	20.643	18.403	19.135	21.772	22.486	20.667	34.603	35.789	44.728	29.812
574	22.604	20.79	19.54	23.685	15.403	24.443	19.346	32.954	31.201	26.299	39.022	20.6	18.43	19.136	21.74	22.274	20.532	34.504	35.741	44.721	29.949
574.5	22.612	20.798	19.497	23.526	15.351	24.349	19.272	32.827	31.146	26.336	38.776	20.492	18.335	19.094	21.686	22.121	20.422	34.36	35.568	44.644	30.229
575	22.566	20.694	19.545	23.422	15.334	24.303	19.192	32.776	31.063	26.389	38.627	20.501	18.159	19.019	21.625	22.096	20.382	33.988	35.397	44.627	30.465
575.5	22.503	20.571	19.597	23.373	15.356	24.339	19.153	32.761	30.961	26.363	38.579	20.487	17.998	18.939	21.585	22.083	20.377	33.666	35.268	44.643	30.447
576	22.482	20.531	19.553	23.338	15.372	24.353	19.123	32.653	30.894	26.247	38.506	20.443	17.841	18.844	21.487	22.095	20.368	33.567	35.309	44.741	30.359
576.5	22.43	20.518	19.422	23.262	15.327	24.257	19.075	32.494	30.799	26.153	38.349	20.336	17.784	18.761	21.356	22.04	20.335	33.742	35.45	44.727	30.225
577	22.391	20.585	19.306	23.18	15.255	24.122	18.998	32.369	30.699	26.036	38.19	20.234	17.768	18.707	21.222	21.983	20.295	33.946	35.523	44.534	30.21
577.5	22.304	20.564	19.204	23.057	15.167	23.944	18.89	32.311	30.625	25.929	37.946	20.234	17.738	18.61	21.164	21.874	20.253	33.86	35.341	44.202	30.15
578	22.255	20.496	19.139	22.948	15.126	23.794	18.814	32.249	30.552	25.822	37.773	20.263	17.716	18.538	21.113	21.801	20.18	33.758	34.974	43.868	30.036
578.5	22.279	20.462	19.101	22.801	15.158	23.722	18.754	32.071	30.46	25.747	37.666	20.252	17.674	18.459	21.069	21.755	20.135	33.612	34.774	43.814	29.995
579	22.279	20.474	19.092	22.632	15.242	23.714	18.692	31.973	30.339	25.676	37.597	20.183	17.711	18.438	21.033	21.725	20.079	33.739	34.837	43.93	29.912
579.5	22.213	20.483	19.052	22.499	15.245	23.736	18.656	31.845	30.184	25.557	37.553	20.075	17.73	18.435	21.008	21.669	20.043	33.953	34.86	44.098	29.882
580	22.04	20.422	18.983	22.348	15.187	23.77	18.629	31.713	30.044	25.444	37.394	20.017	17.703	18.418	20.998	21.622	19.996	34.291	34.854	44.124	29.883
580.5	21.85	20.325	18.906	22.268	15.061	23.777	18.658	31.577	29.993	25.45	37.322	19.964	17.598	18.371	20.922	21.597	19.969	34.424	34.824	44.061	29.932
581	21.742	20.255	18.871	22.254	14.997	23.76	18.632	31.486	29.911	25.426	37.233	19.903	17.486	18.255	20.813	21.626	19.928	34.215	34.82	43.917	30.101
581.5	21.708	20.229	18.798	22.236	14.959	23.679	18.582	31.498	29.859	25.413	37.055	19.837	17.394	18.154	20.695	21.587	19.819	33.823	35.076	43.749	30.075
582	21.707	20.234	18.686	22.211	14.959	23.503	18.498	31.407	29.677	25.287	36.835	19.748	17.336	18.058	20.572	21.53	19.729	33.387	35.305	43.73	30.066
582.5	21.65	20.187	18.546	22.157	14.911	23.339	18.448	31.254	29.562	25.229	36.621	19.72	17.303	18.054	20.476	21.424	19.645	33.198	35.394	43.73	29.918
583	21.557	20.121	18.58	22.085	14.899	23.253	18.425	31.126	29.462	25.213	36.56	19.703	17.271	18.062	20.452	21.3	19.693	33.071	35.23	43.797	29.84
583.5	21.477	20.027	18.654	22.028	14.888	23.199	18.438	31.016	29.403	25.175	36.543	19.774	17.214	18.029	20.448	21.243	19.705	33.087	35.032	43.811	29.84
584	21.439	19.989	18.761	21.933	14.953	23.17	18.411	30.984	29.344	25.15	36.479	19.804	17.197	17.952	20.489	21.16	19.659	33.106	34.906	43.767	29.886
584.5	21.448	19.995	18.857	21.823	15.004	23.181	18.397	30.952	29.323	25.094	36.365	19.797	17.119	17.876	20.476	21.103	19.555	33.366	35.031	43.788	29.997
585	21.481	20.017	18.892	21.71	15.01	23.22	18.335	30.912	29.305	25.104	36.146	19.697	17.068	17.897	20.418	21.014	19.508	33.462	34.798	43.703	29.887
585.5	21.55	20.035	18.845	21.57	14.991	23.209	18.258	30.929	29.312	25.191	36.033	19.547	17.034	17.895	20.374	21.042	19.571	33.505	34.8	43.671	29.69
586	21.594	20.026	18.751	21.482	14.965	23.16	18.207	30.847	29.219	25.285	35.939	19.441	17.08	17.928	20.354	21.091	19.658	33.432	34.837	43.616	29.502
586.5	21.604	19.962	18.634	21.45	14.884	23.023	18.218	30.749	29.117	25.321	35.876	19.382	17.159	17.938	20.346	21.162	19.668	33.402	34.921	43.598	29.504
587	21.644	19.952	18.586	21.43	14.808	22.952	18.214	30.623	29.057	25.234	35.861	19.359	17.128	17.923	20.276	21.182	19.649	33.423	34.979	43.63	29.496
587.5	21.657	19.96	18.589	21.361	14.78	22.944	18.185	30.534	29.022	25.102	35.822	19.359	17.047	17.872	20.171	21.129	19.535	33.311	34.703	43.593	29.297
588	21.644	20.013	18.588	21.262	14.788	22.938	18.104	30.436	28.95	24.911	35.808	19.327	16.967	17.775	20.069	21.077	19.458	33.352	34.629	43.499	29.17
588.5	21.493	20.066	18.576	21.188	14.816	22.866	18.035	30.373	28.903	24.817	35.813	19.299	16.939	17.724	20.001	20.972	19.345	33.642	34.663	43.36	29.196
589	21.328	20.025	18.548	21.155	14.786	22.752	18.027	30.302	28.89	24.77	35.688	19.358	16.979	17.768	19.978	20.903	19.311	33.8	34.592	43.173	29.28
589.5	21.239	19.976	18.53	21.127	14.776	22.69	18.003	30.325	28.896	24.822	35.604	19.399	16.97	17.811	19.969	20.903	19.365	33.831	34.662	43.128	29.354
590	21.206	19.881	18.428	21.086	14.743	22.753	17.997	30.362	28.861	24.912	35.541	19.372	16.881	17.799	20.006	20.897	19.377	33.564	34.683	43.12	29.26
590.5	21.209	19.836	18.353	21.04	14.717	22.817	17.994	30.343	28.763	24.881	35.586	19.329	16.785	17.779	20.071	20.891	19.362	33.443	34.832	43.177	29.177
591	21.218	19.851	18.308	21.04	14.663	22.837	17.947	30.264	28.728	24.812	35.702	19.266	16.706	17.726	20.101	20.831	19.326	33.411	34.921	43.198	28.993
591.5	21.247	19.917	18.336	21.019	14.65	22.817	17.967	30.131	28.731	24.722	35.658	19.234	16.676	17.716	20.103	20.8	19.336	33.35	34.976	43.303	28.918
592	21.311	20.03	18.388	20.977	14.663	22.784	17.92	30.101	28.72	24.72	35.571	19.192	16.67	17.702	20.025	20.806	19.405	33.236	35.056	43.403	29.138
592.5	21.303	20.012	18.426	20.927	14.66	22.741	17.956	30.084	28.614	24.697	35.462	19.164	16.676	17.664	19.957	20.795	19.439	33.012	35.096	43.431	29.401
593	21.264	19.906	18.412	20.907	14.607	22.694	17.964	30.094	28.483	24.66	35.421	19.238	16.737	17.631	19.862	20.815	19.389	32.864	34.942	43.337	29.751
593.5	21.232	19.788	18.374	20.88	14.522	22.648	18.01	29.986	28.325	24.568	35.345	19.237	16.756	17.603	19.833	20.795	19.298	32.762	34.982	43.107	29.815
594	21.213	19.809	18.335	20.843	14.469	22.623	18.032	29.874	28.242	24.489	35.278	19.197	16.747	17.631	19.836	20.806	19.188	32.87	35.119	43.004	29.894
594.5	21.206	19.923	18.367	20.822	14.507	22.632	18.048	29.778	28.203	24.424	35.238	19.196	16.762	17.68	19.923	20.847	19.171	32.858	34.903	42.954	29.602
595	21.23	20.067	18.392	20.801	14.529	22.667	18.064	29.799	28.227	24.424	35.226	19.213	16.776	17.647	20.019	20.9	19.207	32.949	34.546	43.028	29.482
595.5	21.245	20.131	18.344	20.821	14.568	22.666	18.012	29.83	28.25	24.457	35.154	19.221	16.781	17.54	20.051	20.928	19.287	32.772	34.164	43.073	29.454
596	21.202	20.097	18.223	20.787	14.538	22.65	17.967	29.795	28.281	24.492	35.13	19.13	16.764	17.465	19.983	20.857	19.297	32.656	34.066	43.045	29.486
596.5	21.113	19.934	18.104	20.74	14.519	22.617	17.883	29.651	28.325	24.519	35.076	19.016	16.705	17.449	19.823	20.715	19.264	32.518	34.259	43.029	29.43
597	21.083	19.771	18.093	20.64	14.481	22.595	17.855	29.516	28.369	24.559	35.055	18.97	16.659	17.491	19.698	20.67	19.292	32.513	34.292	43.046	29.31
597.5	21.157	19.702	18.107	20.545	14.465	22.573	17.876	29.498	28.336	24.569	34.98	18.932	16.612	17.526	19.648	20.64	19.324	32.377	34.143	43.128	29.374
598	21.256	19.743	18.093	20.512	14.503	22.485	17.909	29.467	28.212	24.49	34.982	18.905	16.587	17.49	19.684	20.611	19.36	32.268	34.106	43.194	29.391
598.5	21.19	19.837	18.029	20.542	14.538	22.437	17.962	29.417	28.152	24.363	34.953	18.922	16.601	17.453	19.755	20.554	19.363	32.326	34.118	43.172	29.419
599	21.09	19.944	18.014	20.575	14.563	22.43	17.992	29.301	28.13	24.267	34.925	18.917	16.607	17.407	19.799	20.44	19.34	32.507	34.272	43.149	29.44
599.5	21.042	20.009	18.066	20.602	14.585	22.473	18.007	29.273	28.12	24.298	34.823	18.897	16.622	17.417	19.74	20.454	19.33	32.487	34.092	43.134	29.528
600	21.06	20.018	18.164	20.582	14.618	22.502	18.003	29.257	28.1	24.345	34.764	18.886	16.621	17.457	19.667	20.515	19.284	32.241	33.88	43.173	29.496
600.5	21.079	19.935	18.229	20.571	14.596	22.477	17.932	29.222	28.106	24.387	34.714	18.914	16.549	17.448	19.612	20.557	19.282	32.13	33.936	43.22	29.26
601	21.05	19.862	18.27	20.554	14.544	22.47	17.827	29.168	28.092	24.353	34.671	18.966	16.508	17.433	19.602	20.521	19.287	32.241	34.139	43.169	28.973
601.5	21.068	19.819	18.244	20.502	14.506	22.487	17.728	29.123	27.99	24.302	34.597	19.019	16.518	17.39	19.639	20.465	19.254	32.436	34.333	43.104	28.846
602	21.118	19.783	18.184	20.425	14.496	22.507	17.643	29.132	27.85	24.258	34.493	18.992	16.558	17.344	19.621	20.456	19.212	32.348	34.327	43.027	29.025
602.5	21.09	19.775	18.104	20.344	14.472	22.485	17.648	29.114	27.788	24.264	34.458	18.977	16.566	17.315	19.578	20.514	19.182	32.412	34.309	42.972	29.333
603	20.969	19.765	18.066	20.302	14.419	22.412	17.653	29.062	27.825	24.328	34.448	18.891	16.499	17.299	19.514	20.536	19.213	32.558	34.389	42.87	29.226
603.5	20.848	19.786	17.997	20.247	14.376	22.365	17.607	29.042	27.89	24.382	34.495	18.737	16.421	17.344	19.442	20.558	19.192	32.807	34.328	42.839	28.916
604	20.82	19.787	17.975	20.201	14.433	22.325	17.544	28.997	27.89	24.341	34.401	18.561	16.384	17.35	19.437	20.581	19.157	32.832	34.237	42.793	28.62
604.5	20.838	19.747	17.992	20.148	14.484	22.316	17.502	29.028	27.839	24.273	34.204	18.449	16.324	17.328	19.409	20.604	19.165	32.731	34.197	42.847	28.661
605	20.875	19.759	18.068	20.131	14.507	22.29	17.529	28.912	27.694	24.125	33.971	18.481	16.367	17.26	19.393	20.641	19.161	32.731	34.301	42.843	28.813
605.5	20.904	19.738	18.078	20.104	14.491	22.229	17.513	28.825	27.586	23.995	33.767	18.625	16.404	17.249	19.372	20.664	19.162	32.782	34.358	42.796	28.828
606	20.924	19.746	18.006	20.057	14.438	22.146	17.517	28.713	27.547	23.907	33.732	18.734	16.422	17.296	19.359	20.657	19.116	32.742	34.152	42.649	28.86
606.5	20.921	19.662	17.936	19.969	14.394	22.103	17.51	28.669	27.543	23.993	33.77	18.755	16.358	17.27	19.336	20.577	19.064	32.534	34.019	42.552	28.966
607	20.889	19.603	17.924	19.894	14.368	22.084	17.463	28.63	27.535	24.179	33.799	18.719	16.28	17.216	19.341	20.517	19.015	32.223	33.912	42.492	29.216
607.5	20.883	19.61	17.959	19.869	14.369	22.07	17.403	28.563	27.434	24.287	33.792	18.717	16.293	17.135	19.376	20.483	18.962	32.016	33.948	42.551	29.393
608	20.837	19.609	17.978	19.879	14.367	22.017	17.328	28.512	27.337	24.207	33.672	18.677	16.291	17.101	19.382	20.436	18.917	31.974	34.081	42.507	29.467
608.5	20.79	19.627	17.992	19.869	14.35	21.986	17.346	28.449	27.226	24.046	33.56	18.645	16.242	17.078	19.418	20.382	18.862	32.03	34.22	42.456	29.2
609	20.767	19.678	17.991	19.845	14.371	21.962	17.348	28.39	27.154	23.913	33.474	18.603	16.154	17.038	19.405	20.307	18.813	31.983	34.234	42.371	28.969
609.5	20.791	19.726	17.967	19.804	14.374	21.943	17.302	28.269	27.087	23.842	33.493	18.563	16.117	17.015	19.363	20.359	18.845	32.01	34.052	42.412	28.696
610	20.786	19.791	17.846	19.712	14.3	21.882	17.244	28.163	26.956	23.851	33.496	18.543	16.145	16.998	19.267	20.453	18.921	31.967	33.807	42.464	28.842
610.5	20.732	19.786	17.698	19.568	14.219	21.822	17.204	28.018	26.861	23.879	33.465	18.511	16.143	17.008	19.189	20.481	18.979	32.057	33.634	42.494	29.167
611	20.612	19.711	17.606	19.427	14.196	21.759	17.174	27.957	26.831	23.937	33.305	18.468	16.074	17.006	19.142	20.423	18.968	31.974	33.402	42.419	29.438
611.5	20.479	19.608	17.67	19.382	14.263	21.683	17.1	27.869	26.836	23.889	33.077	18.397	16.043	16.981	19.067	20.286	18.868	31.903	33.104	42.291	29.378
612	20.448	19.533	17.719	19.34	14.302	21.605	17.035	27.851	26.823	23.83	32.798	18.319	16.02	16.951	18.929	20.207	18.804	31.915	33.075	42.325	29.15
612.5	20.463	19.531	17.69	19.263	14.256	21.554	17.024	27.795	26.743	23.741	32.655	18.25	16.031	16.885	18.832	20.169	18.773	31.947	33.039	42.408	29.093
613	20.518	19.547	17.612	19.16	14.195	21.552	17.021	27.735	26.682	23.761	32.721	18.278	15.994	16.866	18.812	20.113	18.818	32.015	33.458	42.412	29.13
613.5	20.436	19.545	17.549	19.047	14.159	21.552	16.985	27.633	26.589	23.801	32.78	18.285	15.954	16.855	18.921	20.104	18.88	31.846	33.613	42.183	28.991
614	20.273	19.562	17.539	19.007	14.162	21.487	16.916	27.526	26.436	23.784	32.667	18.288	15.926	16.846	18.974	20.138	18.952	31.737	33.561	41.925	29.062
614.5	20.215	19.532	17.522	18.936	14.142	21.403	16.865	27.451	26.326	23.727	32.488	18.301	15.892	16.815	18.969	20.182	18.987	31.847	33.389	41.83	29.262
615	20.222	19.476	17.472	18.869	14.089	21.291	16.82	27.425	26.278	23.614	32.46	18.285	15.865	16.694	18.889	20.168	18.894	32.065	33.345	41.865	29.422
615.5	20.214	19.421	17.415	18.779	14.048	21.178	16.785	27.433	26.239	23.591	32.461	18.301	15.876	16.638	18.848	20.195	18.765	32.255	33.489	41.828	29.26
616	20.119	19.487	17.382	18.733	14.054	21.086	16.784	27.462	26.217	23.551	32.38	18.321	15.904	16.664	18.875	20.175	18.666	32.114	33.363	41.816	28.949
616.5	20.049	19.525	17.455	18.671	14.054	21.046	16.759	27.367	26.147	23.482	32.09	18.35	15.925	16.69	18.837	20.166	18.673	31.884	33.209	41.796	28.929
617	20.108	19.524	17.504	18.604	14.049	21.049	16.74	27.235	26.126	23.359	31.92	18.369	15.878	16.688	18.826	20.077	18.711	31.822	33.101	41.811	28.886
617.5	20.174	19.516	17.502	18.528	14.077	21.036	16.717	27.046	26.072	23.28	31.871	18.325	15.756	16.611	18.788	20.045	18.748	31.736	33.199	41.89	28.963
618	20.206	19.521	17.443	18.495	14.101	20.943	16.734	26.906	25.983	23.244	31.929	18.255	15.668	16.567	18.798	20.096	18.814	31.602	33.425	41.845	29.03
618.5	20.146	19.521	17.417	18.493	14.12	20.878	16.708	26.829	25.86	23.267	31.905	18.191	15.631	16.538	18.798	20.087	18.857	31.472	33.55	41.868	29.283
619	20.035	19.411	17.394	18.412	14.061	20.826	16.666	26.722	25.746	23.272	31.833	18.156	15.64	16.538	18.777	20.033	18.786	31.669	33.526	41.606	29.401
619.5	19.964	19.339	17.358	18.296	14.014	20.817	16.637	26.661	25.719	23.339	31.702	18.106	15.607	16.516	18.759	19.963	18.666	31.788	33.245	41.515	29.406
620	19.935	19.295	17.327	18.177	14.011	20.788	16.658	26.573	25.708	23.36	31.645	18.057	15.58	16.521	18.745	19.897	18.583	31.732	33.174	41.58	29.213
620.5	19.972	19.322	17.334	18.164	14.012	20.702	16.654	26.59	25.69	23.337	31.591	18.055	15.633	16.55	18.755	19.88	18.59	31.328	33.176	41.783	28.919
621	19.937	19.295	17.344	18.186	13.991	20.612	16.615	26.594	25.67	23.238	31.573	18.086	15.706	16.569	18.738	19.914	18.664	31.287	33.243	41.843	28.748
621.5	19.888	19.273	17.34	18.2	13.945	20.589	16.592	26.567	25.617	23.131	31.59	18.115	15.687	16.54	18.654	19.963	18.657	31.198	33.215	41.691	28.769
622	19.853	19.247	17.262	18.171	13.932	20.533	16.575	26.378	25.55	23.042	31.534	18.093	15.602	16.467	18.532	19.98	18.602	31.282	33.283	41.506	28.909
622.5	19.897	19.347	17.167	18.136	14.011	20.508	16.54	26.2	25.416	22.985	31.504	18.007	15.519	16.473	18.447	19.902	18.511	31.34	33.37	41.592	28.981
623	19.93	19.44	17.139	18.105	14.068	20.489	16.526	26.156	25.393	22.932	31.472	17.943	15.541	16.537	18.476	19.869	18.512	31.479	33.319	41.631	29.106
623.5	19.997	19.517	17.171	18.087	14.082	20.522	16.473	26.292	25.423	22.948	31.451	17.914	15.615	16.637	18.535	19.815	18.534	31.692	33.383	41.622	29.105
624	20.052	19.432	17.189	18.08	14.008	20.576	16.423	26.386	25.488	23.007	31.538	17.924	15.659	16.628	18.592	19.767	18.589	31.756	33.481	41.48	28.919
624.5	20.098	19.426	17.201	18.079	13.98	20.632	16.338	26.413	25.534	23.115	31.598	17.93	15.625	16.548	18.578	19.735	18.575	31.834	33.487	41.347	28.75
625	20.101	19.393	17.178	18.058	13.957	20.676	16.307	26.352	25.545	23.162	31.544	17.921	15.532	16.462	18.521	19.791	18.55	31.546	33.077	41.347	28.702
625.5	20.063	19.382	17.215	18.057	13.96	20.668	16.379	26.312	25.478	23.192	31.41	17.941	15.505	16.469	18.547	19.851	18.45	31.346	32.588	41.321	28.797
626	19.999	19.313	17.201	18.051	13.955	20.615	16.396	26.245	25.442	23.175	31.36	17.986	15.504	16.513	18.57	19.792	18.404	31.281	32.315	41.299	28.779
626.5	19.934	19.288	17.162	18.031	13.952	20.516	16.388	26.165	25.446	23.174	31.433	17.993	15.496	16.48	18.614	19.719	18.401	31.419	32.412	41.269	28.87
627	19.912	19.329	17.125	17.988	13.978	20.441	16.314	26.15	25.473	23.155	31.53	17.956	15.432	16.424	18.515	19.696	18.449	31.54	32.776	41.251	29.071
627.5	19.923	19.347	17.085	17.93	13.983	20.397	16.307	26.14	25.456	23.157	31.466	17.911	15.42	16.422	18.477	19.753	18.507	31.497	33.076	41.318	29.288
628	19.894	19.338	17.079	17.888	14.001	20.374	16.289	26.112	25.366	23.189	31.346	17.888	15.458	16.423	18.44	19.748	18.518	31.351	33.024	41.408	29.175
628.5	19.874	19.312	17.09	17.855	14.019	20.368	16.306	26.094	25.281	23.156	31.166	17.942	15.502	16.36	18.442	19.722	18.51	31.327	32.897	41.414	28.902
629	19.789	19.28	17.114	17.85	14.042	20.341	16.346	26.073	25.173	23.09	31.087	17.991	15.507	16.282	18.42	19.67	18.515	31.331	32.77	41.306	28.609
629.5	19.803	19.215	17.104	17.854	14.045	20.335	16.411	26.115	25.168	23.019	31.082	18.018	15.465	16.317	18.463	19.647	18.49	31.382	32.943	41.186	28.47
630	19.764	19.165	17.085	17.878	14.028	20.339	16.397	26.1	25.208	23.017	31.152	17.978	15.458	16.398	18.553	19.614	18.483	31.366	33.14	41.036	28.455
630.5	19.779	19.193	17.068	17.885	13.976	20.35	16.321	26.051	25.216	23.063	31.134	17.878	15.451	16.431	18.624	19.591	18.436	31.117	33.07	40.97	28.598
631	19.745	19.263	17.093	17.904	13.943	20.413	16.285	26.017	25.163	23.081	31.109	17.853	15.51	16.434	18.622	19.601	18.457	30.964	32.819	40.849	28.727
631.5	19.69	19.286	17.119	17.928	13.925	20.462	16.306	26.026	25.147	23.069	30.985	17.866	15.526	16.451	18.617	19.611	18.54	30.679	32.403	40.846	28.968
632	19.779	19.345	17.169	17.948	13.943	20.476	16.377	26.034	25.243	23.022	30.945	17.896	15.534	16.45	18.561	19.67	18.611	30.688	32.201	40.893	29.02
632.5	19.908	19.339	17.231	17.94	13.966	20.439	16.379	25.953	25.306	23.036	30.924	17.845	15.481	16.395	18.458	19.711	18.637	31.025	32.374	40.898	29.031
633	19.967	19.322	17.273	17.904	13.982	20.381	16.35	25.875	25.252	23.044	31.013	17.755	15.489	16.301	18.336	19.68	18.586	31.399	32.53	40.886	28.816
633.5	19.9	19.234	17.29	17.838	13.981	20.336	16.256	25.852	25.124	23.059	30.969	17.733	15.471	16.252	18.3	19.64	18.495	31.466	32.628	40.826	28.811
634	19.922	19.288	17.269	17.797	13.955	20.339	16.252	25.897	25.04	23.026	30.92	17.766	15.428	16.241	18.352	19.564	18.404	31.043	32.452	40.796	28.746
634.5	20.008	19.347	17.244	17.776	13.892	20.383	16.214	25.833	25.004	22.951	30.799	17.838	15.375	16.287	18.396	19.609	18.391	30.568	32.437	40.628	28.609
635	20.063	19.314	17.251	17.788	13.845	20.408	16.23	25.669	24.992	22.88	30.717	17.878	15.355	16.394	18.401	19.671	18.41	30.611	32.571	40.585	28.333
635.5	19.955	19.21	17.245	17.756	13.822	20.353	16.133	25.509	24.878	22.782	30.599	17.884	15.409	16.467	18.355	19.713	18.45	30.978	32.784	40.572	28.239
636	19.821	19.193	17.214	17.668	13.85	20.253	16.12	25.431	24.732	22.722	30.512	17.842	15.44	16.482	18.356	19.652	18.365	31.401	32.97	40.703	28.438
636.5	19.757	19.203	17.148	17.569	13.848	20.153	16.108	25.444	24.626	22.645	30.438	17.798	15.481	16.475	18.358	19.581	18.308	31.36	32.858	40.716	28.741
637	19.778	19.205	17.053	17.506	13.811	20.068	16.142	25.426	24.638	22.61	30.371	17.749	15.483	16.45	18.389	19.566	18.252	31.199	32.819	40.741	29.039
637.5	19.85	19.197	16.955	17.446	13.77	19.977	16.16	25.414	24.663	22.645	30.276	17.665	15.423	16.4	18.373	19.613	18.311	30.9	32.803	40.66	29.28
638	19.866	19.221	16.86	17.368	13.731	19.901	16.135	25.303	24.581	22.654	30.18	17.575	15.365	16.342	18.327	19.625	18.389	30.674	32.719	40.532	29.184
638.5	19.745	19.21	16.815	17.322	13.688	19.877	16.04	25.082	24.347	22.648	30.035	17.432	15.285	16.243	18.211	19.621	18.439	30.182	32.447	40.322	28.896
639	19.6	19.087	16.867	17.272	13.666	19.848	15.943	24.819	24.139	22.542	29.834	17.457	15.302	16.243	18.11	19.511	18.412	30.113	32.233	40.162	28.539
639.5	19.557	18.984	16.903	17.209	13.658	19.79	15.868	24.584	23.98	22.405	29.64	17.475	15.279	16.193	18.05	19.417	18.327	30.125	32.184	40.087	28.52
640	19.578	18.902	16.927	17.071	13.719	19.722	15.8	24.465	23.945	22.35	29.506	17.572	15.258	16.204	18.062	19.357	18.286	30.396	32.341	40.124	28.57
640.5	19.562	18.82	16.908	16.942	13.763	19.69	15.685	24.347	23.935	22.388	29.402	17.556	15.204	16.156	18.016	19.322	18.284	30.409	32.218	40.133	28.721
641	19.522	18.807	16.9	16.828	13.855	19.731	15.586	24.158	23.842	22.464	29.271	17.492	15.14	16.099	17.902	19.315	18.309	30.461	32.068	40.086	28.762
641.5	19.555	18.796	16.872	16.794	13.846	19.736	15.541	23.981	23.712	22.469	29.099	17.391	15.083	15.999	17.787	19.24	18.317	30.511	32.037	39.977	28.691
642	19.523	18.834	16.801	16.809	13.796	19.694	15.511	23.845	23.531	22.386	28.992	17.296	15.056	15.906	17.746	19.235	18.29	30.69	32.056	39.944	28.468
642.5	19.447	18.849	16.715	16.842	13.69	19.581	15.475	23.737	23.391	22.297	28.86	17.268	15.059	15.904	17.77	19.184	18.234	30.718	32.089	39.974	28.285
643	19.378	18.976	16.659	16.811	13.606	19.462	15.461	23.584	23.273	22.196	28.718	17.23	15.07	15.897	17.748	19.159	18.224	30.554	32.039	39.926	28.202
643.5	19.479	19.159	16.634	16.703	13.569	19.32	15.441	23.409	23.201	22.16	28.553	17.163	15.018	15.835	17.708	19.122	18.239	30.307	32.004	39.923	28.1
644	19.581	19.203	16.611	16.549	13.507	19.149	15.359	23.338	23.165	22.137	28.43	17.088	14.956	15.756	17.68	19.138	18.254	30.147	31.887	39.885	27.986
644.5	19.62	19.136	16.632	16.407	13.497	19.009	15.239	23.323	23.061	22.077	28.326	17.051	14.845	15.669	17.605	19.202	18.217	30.113	31.509	39.899	27.935
645	19.605	19.008	16.648	16.293	13.491	18.888	15.125	23.221	22.853	21.974	28.232	17.128	14.831	15.708	17.567	19.212	18.169	30.026	31.408	39.795	28.012
645.5	19.59	18.978	16.69	16.205	13.501	18.818	15.031	22.99	22.581	21.868	28.073	17.135	14.808	15.712	17.562	19.161	18.144	29.815	31.562	39.689	28.038
646	19.503	18.909	16.694	16.157	13.502	18.763	14.977	22.776	22.446	21.856	27.955	17.148	14.852	15.741	17.583	19.054	18.11	29.764	31.769	39.518	28.154
646.5	19.389	18.854	16.683	16.124	13.499	18.7	14.948	22.725	22.418	21.878	27.741	17.137	14.864	15.749	17.603	19.053	18.071	29.842	31.677	39.553	28.171
647	19.306	18.867	16.602	16.069	13.503	18.626	14.956	22.747	22.443	21.86	27.641	17.23	14.874	15.786	17.628	19.085	18.077	30.126	31.332	39.627	28.156
647.5	19.304	18.839	16.517	16.001	13.513	18.551	14.967	22.664	22.333	21.769	27.55	17.276	14.889	15.795	17.66	19.146	18.063	30.434	31.119	39.737	28.239
648	19.28	18.844	16.432	15.946	13.545	18.519	14.942	22.451	22.204	21.644	27.513	17.303	14.876	15.795	17.688	19.146	18.056	30.369	30.958	39.787	28.35
648.5	19.269	18.844	16.457	16.002	13.556	18.486	14.925	22.175	22.185	21.591	27.482	17.241	14.876	15.765	17.598	19.202	18.026	29.939	30.979	39.781	28.543
649	19.206	18.932	16.461	16.062	13.563	18.44	14.876	22.016	22.177	21.617	27.323	17.145	14.86	15.691	17.529	19.207	18.038	29.531	31.299	39.803	28.587
649.5	19.203	19.012	16.466	16.096	13.544	18.368	14.848	21.895	22.088	21.688	27.182	17.039	14.856	15.672	17.45	19.176	18.039	29.311	31.455	39.766	28.684
650	19.273	19.053	16.371	16.034	13.574	18.334	14.796	21.824	21.996	21.757	27.057	16.981	14.853	15.626	17.454	19.154	18.004	29.425	31.558	39.653	28.681
650.5	19.299	19.055	16.34	15.967	13.593	18.317	14.793	21.738	21.898	21.739	27.111	17.005	14.835	15.62	17.432	19.136	17.902	29.446	31.359	39.552	28.504
651	19.314	18.995	16.388	15.923	13.586	18.3	14.784	21.707	21.869	21.631	27.111	17.02	14.771	15.557	17.374	19.155	17.807	29.554	31.242	39.481	28.211
651.5	19.296	18.93	16.45	15.918	13.554	18.329	14.771	21.696	21.817	21.529	27.115	17.028	14.74	15.503	17.343	19.141	17.834	29.507	31.096	39.509	28.079
652	19.381	18.911	16.475	15.912	13.532	18.302	14.714	21.69	21.851	21.471	27.09	17.04	14.696	15.509	17.391	19.151	17.924	29.438	30.966	39.515	28.207
652.5	19.383	18.938	16.473	15.861	13.503	18.255	14.653	21.706	21.938	21.539	27.141	17.026	14.696	15.539	17.444	19.176	18.021	29.391	31.026	39.467	28.481
653	19.315	18.966	16.526	15.782	13.46	18.136	14.642	21.763	21.976	21.626	27.093	17.007	14.709	15.614	17.426	19.169	17.991	29.566	31.032	39.518	28.411
653.5	19.197	18.921	16.566	15.71	13.397	18.02	14.63	21.703	21.926	21.662	27.001	17.027	14.782	15.692	17.382	19.16	17.975	29.575	31.107	39.639	28.141
654	19.175	18.853	16.549	15.681	13.344	17.873	14.664	21.546	21.858	21.643	26.871	17.078	14.836	15.746	17.43	19.131	18.015	29.464	31.108	39.742	27.989
654.5	19.149	18.807	16.49	15.662	13.339	17.749	14.654	21.405	21.829	21.624	26.78	17.086	14.84	15.737	17.497	19.094	18.091	29.255	30.825	39.696	28.104
655	19.182	18.814	16.416	15.643	13.362	17.698	14.574	21.333	21.829	21.626	26.673	17.038	14.774	15.663	17.5	19.076	18.059	29.302	30.441	39.684	28.386
655.5	19.229	18.829	16.36	15.617	13.447	17.793	14.489	21.247	21.741	21.607	26.573	17.04	14.737	15.598	17.485	19.092	17.994	29.472	30.09	39.697	28.453
656	19.264	18.913	16.348	15.604	13.523	17.86	14.431	21.149	21.593	21.487	26.53	17.079	14.751	15.581	17.555	19.091	17.918	29.567	30.395	39.666	28.417
656.5	19.18	18.954	16.359	15.578	13.57	17.843	14.432	21.132	21.487	21.368	26.477	17.105	14.812	15.614	17.66	19.099	17.938	29.389	30.78	39.516	28.341
657	18.991	18.966	16.375	15.542	13.535	17.77	14.402	21.189	21.478	21.246	26.357	17.071	14.86	15.637	17.672	19.036	17.977	29.071	31.047	39.324	28.263
657.5	18.873	18.912	16.353	15.458	13.469	17.671	14.345	21.099	21.459	21.205	26.195	17.013	14.82	15.666	17.594	19.022	18.005	28.843	30.985	39.343	28.205
658	18.876	18.825	16.353	15.387	13.404	17.575	14.317	21.003	21.375	21.209	26.095	16.936	14.795	15.689	17.504	18.97	17.992	28.776	30.77	39.502	28.062
658.5	18.929	18.766	16.323	15.351	13.384	17.471	14.259	20.885	21.198	21.239	26.104	16.885	14.767	15.703	17.481	18.941	17.961	29.087	30.726	39.653	27.94
659	18.9	18.674	16.312	15.357	13.354	17.457	14.197	20.916	21.092	21.281	26.148	16.854	14.763	15.694	17.461	18.926	17.968	29.428	30.78	39.739	27.986
659.5	18.856	18.671	16.283	15.332	13.347	17.499	14.143	20.853	21.049	21.242	26.105	16.85	14.716	15.66	17.526	18.973	18.046	29.64	30.941	39.694	28.052
660	18.844	18.717	16.285	15.294	13.329	17.537	14.112	20.678	21.042	21.137	25.904	16.809	14.652	15.629	17.577	19.024	18.074	29.229	30.902	39.657	28.254
660.5	18.865	18.759	16.293	15.302	13.311	17.54	14.078	20.419	21.064	21.014	25.701	16.721	14.617	15.555	17.552	19.067	18.047	28.719	30.456	39.496	28.376
661	18.837	18.81	16.305	15.334	13.303	17.489	14.032	20.255	21.112	20.992	25.532	16.683	14.635	15.551	17.467	19.097	17.973	28.632	30.246	39.384	28.442
661.5	18.826	18.784	16.272	15.35	13.328	17.407	13.999	20.208	21.112	21.048	25.446	16.764	14.709	15.54	17.424	19.157	17.987	28.84	30.214	39.291	28.25
662	18.862	18.786	16.263	15.338	13.403	17.315	14.013	20.164	20.962	21.096	25.36	16.878	14.729	15.565	17.469	19.155	18.076	28.968	30.355	39.248	28.049
662.5	18.997	18.764	16.27	15.3	13.438	17.239	13.983	20.046	20.782	21.095	25.344	16.885	14.712	15.575	17.464	19.135	18.149	28.763	30.435	39.202	28.062
663	19.042	18.807	16.343	15.223	13.418	17.133	13.899	19.913	20.714	21.062	25.395	16.777	14.661	15.558	17.422	19.078	18.154	28.764	30.55	39.199	28.396
663.5	18.976	18.775	16.336	15.104	13.391	17.002	13.832	19.824	20.758	21.063	25.355	16.689	14.658	15.554	17.422	19.079	18.125	28.973	30.745	39.075	28.706
664	18.878	18.749	16.316	14.998	13.405	16.921	13.845	19.754	20.764	21.012	25.266	16.73	14.672	15.549	17.476	19.084	18.139	29.031	30.499	39.064	28.791
664.5	18.882	18.757	16.251	14.954	13.457	16.922	13.902	19.655	20.688	20.976	25.102	16.793	14.729	15.578	17.507	19.16	18.148	28.809	29.973	39.085	28.686
665	18.964	18.788	16.168	14.931	13.457	16.891	13.889	19.595	20.55	20.943	24.918	16.868	14.767	15.618	17.45	19.235	18.111	28.488	29.769	39.117	28.539
665.5	18.975	18.758	16.128	14.942	13.45	16.828	13.819	19.489	20.448	20.992	24.789	16.893	14.79	15.687	17.436	19.32	18.148	28.189	29.94	39.005	28.448
666	18.936	18.684	16.191	14.915	13.459	16.743	13.762	19.412	20.4	21.028	24.731	16.917	14.786	15.74	17.497	19.434	18.264	28.136	30.2	38.988	28.129
666.5	18.902	18.719	16.332	14.905	13.486	16.738	13.779	19.318	20.403	21.057	24.705	16.92	14.779	15.769	17.564	19.526	18.399	28.191	30.271	39.213	27.941
667	18.912	18.867	16.403	14.901	13.489	16.714	13.821	19.246	20.36	21.036	24.609	16.854	14.8	15.68	17.54	19.576	18.411	28.519	30.188	39.349	28.063
667.5	18.976	19.003	16.359	14.95	13.468	16.662	13.888	19.182	20.303	21.021	24.473	16.819	14.806	15.585	17.505	19.526	18.33	28.666	30.088	39.241	28.575
668	19.063	19.011	16.277	15.031	13.442	16.617	13.887	19.094	20.279	20.991	24.362	16.786	14.823	15.579	17.507	19.473	18.295	28.624	30.03	39.113	28.862
668.5	19.086	18.883	16.224	15.089	13.427	16.617	13.875	19.052	20.306	21.007	24.368	16.841	14.841	15.699	17.621	19.509	18.333	28.385	29.993	39.166	28.605
669	19.005	18.803	16.235	15.116	13.41	16.675	13.808	19.064	20.352	21.001	24.392	16.88	14.829	15.814	17.668	19.593	18.421	28.22	29.861	39.296	28.065
669.5	18.909	18.823	16.295	15.103	13.407	16.718	13.789	19.042	20.334	20.969	24.393	16.905	14.805	15.809	17.69	19.62	18.424	28.275	29.779	39.234	27.972
670	18.924	18.942	16.332	15.081	13.425	16.702	13.751	19.008	20.271	20.889	24.229	16.858	14.803	15.809	17.656	19.523	18.378	28.385	29.772	39.035	28.342
670.5	18.934	18.947	16.342	15.06	13.47	16.622	13.752	18.962	20.214	20.893	24.124	16.802	14.798	15.874	17.689	19.449	18.332	28.651	29.927	38.986	28.815
671	18.905	18.87	16.322	15.085	13.535	16.591	13.765	18.971	20.248	20.907	24.08	16.834	14.839	15.95	17.742	19.48	18.343	28.799	30.172	39.058	28.871
671.5	18.91	18.773	16.33	15.111	13.584	16.624	13.827	19.025	20.359	20.965	24.138	16.895	14.847	15.934	17.765	19.591	18.446	28.967	30.32	39.137	28.599
672	18.917	18.814	16.36	15.117	13.614	16.683	13.874	19.065	20.425	21.021	24.211	16.941	14.925	15.845	17.81	19.624	18.582	28.847	30.417	39.081	28.284
672.5	18.913	18.855	16.339	15.088	13.631	16.691	13.878	19.059	20.432	21.156	24.2	16.901	14.976	15.826	17.876	19.674	18.662	28.737	30.372	38.883	28.306
673	18.899	18.916	16.316	15.07	13.64	16.714	13.834	19.034	20.46	21.269	24.178	16.876	15.051	15.799	17.98	19.684	18.629	28.623	30.528	38.798	28.537
673.5	18.948	18.913	16.299	15.073	13.65	16.76	13.833	19.009	20.519	21.287	24.093	16.861	15.052	15.781	17.999	19.733	18.563	28.187	30.43	38.746	28.918
674	19.052	18.996	16.358	15.1	13.699	16.835	13.869	18.998	20.561	21.26	24.062	16.896	15.03	15.835	17.934	19.783	18.552	27.832	30.211	38.848	29.018
674.5	19.12	19.008	16.425	15.156	13.697	16.864	13.958	19.008	20.527	21.284	24.06	16.932	15.053	15.902	17.852	19.852	18.57	27.479	29.859	38.852	29.057
675	19.151	18.956	16.487	15.217	13.667	16.865	14.014	18.991	20.513	21.33	24.049	16.989	15.108	15.954	17.825	19.934	18.584	27.428	29.918	38.802	28.818
675.5	19.143	18.883	16.506	15.267	13.605	16.832	14.007	19.021	20.515	21.358	24.065	17.056	15.179	15.896	17.928	20.038	18.659	27.587	30.25	38.734	28.545
676	19.032	18.872	16.466	15.354	13.561	16.832	13.946	19.078	20.593	21.353	24.097	17.12	15.201	15.913	18.052	20.097	18.815	27.71	30.465	38.793	28.284
676.5	18.945	18.92	16.401	15.483	13.547	16.851	13.896	19.14	20.658	21.322	24.155	17.156	15.258	16.018	18.167	20.105	18.945	28.077	30.63	38.864	28.529
677	18.922	18.933	16.402	15.589	13.601	16.9	13.897	19.23	20.746	21.343	24.176	17.174	15.275	16.079	18.261	20.077	18.948	28.31	30.503	38.887	28.658
677.5	18.987	18.883	16.457	15.566	13.721	16.9	13.96	19.253	20.79	21.407	24.155	17.194	15.272	16.129	18.374	20.077	18.903	28.607	30.803	38.828	28.719
678	19.076	18.782	16.528	15.501	13.804	16.907	14.022	19.312	20.835	21.507	24.106	17.254	15.315	16.165	18.423	20.098	18.927	28.703	30.964	38.822	28.553
678.5	19.137	18.774	16.574	15.475	13.83	16.905	14.161	19.39	20.892	21.573	24.056	17.271	15.358	16.181	18.413	20.149	19.025	28.478	30.887	38.826	28.72
679	19.203	18.928	16.591	15.567	13.825	16.895	14.273	19.494	20.989	21.559	24.032	17.276	15.345	16.198	18.413	20.238	19.096	28.325	30.664	38.933	28.94
679.5	19.306	19.104	16.598	15.647	13.814	16.912	14.352	19.585	21.046	21.525	24.091	17.258	15.316	16.202	18.478	20.312	19.127	28.209	30.405	39.065	29.009
680	19.328	19.125	16.592	15.702	13.793	16.94	14.285	19.589	21.085	21.492	24.109	17.252	15.34	16.259	18.559	20.343	19.163	28.184	30.425	39.157	28.784
680.5	19.369	19.039	16.636	15.746	13.785	17.03	14.199	19.561	20.999	21.485	23.997	17.326	15.426	16.26	18.642	20.396	19.207	28.096	30.509	39.161	28.581
681	19.335	18.961	16.652	15.815	13.808	17.105	14.183	19.664	21.048	21.538	23.942	17.419	15.53	16.268	18.764	20.454	19.226	28.184	30.602	39.128	28.559
681.5	19.317	18.968	16.642	15.876	13.835	17.179	14.241	19.882	21.104	21.639	24.006	17.486	15.6	16.3	18.924	20.491	19.252	28.42	30.745	39.188	28.67
682	19.267	19.076	16.648	15.927	13.89	17.29	14.339	20.099	21.254	21.796	24.215	17.474	15.635	16.375	19.042	20.451	19.301	28.566	30.854	39.258	28.903
682.5	19.242	19.234	16.716	15.978	13.945	17.374	14.43	20.161	21.319	21.918	24.329	17.437	15.64	16.387	19.057	20.481	19.296	28.629	30.996	39.319	29.168
683	19.208	19.349	16.815	16.007	14.007	17.455	14.576	20.167	21.477	21.918	24.366	17.431	15.656	16.4	18.978	20.542	19.265	28.745	31.206	39.385	29.227
683.5	19.251	19.371	16.849	16.026	14.031	17.52	14.701	20.313	21.624	21.843	24.368	17.441	15.687	16.388	18.906	20.539	19.21	28.767	31.365	39.482	29.065
684	19.369	19.358	16.869	15.951	14.06	17.616	14.821	20.473	21.779	21.782	24.392	17.472	15.743	16.431	18.951	20.463	19.272	28.844	31.568	39.517	28.884
684.5	19.54	19.301	16.872	15.944	14.093	17.728	14.891	20.66	21.837	21.86	24.429	17.483	15.752	16.448	18.988	20.355	19.304	28.986	31.824	39.537	28.937
685	19.568	19.241	16.909	16.005	14.112	17.819	15.005	20.733	21.923	21.994	24.432	17.523	15.688	16.458	18.971	20.383	19.35	29.34	31.994	39.596	29.12
685.5	19.486	19.233	16.977	16.207	14.129	17.925	15.125	20.911	22	22.061	24.464	17.596	15.638	16.469	18.933	20.458	19.365	29.408	32.266	39.696	29.092
686	19.323	19.164	17.053	16.395	14.138	18.03	15.238	21.167	22.152	22.067	24.58	17.737	15.702	16.572	19.025	20.575	19.362	29.194	32.186	39.726	29.011
686.5	19.248	19.095	17.086	16.523	14.156	18.161	15.347	21.543	22.408	22.068	24.814	17.863	15.823	16.693	19.207	20.614	19.374	28.985	32.204	39.676	28.839
687	19.234	19.047	17.033	16.602	14.152	18.3	15.515	21.896	22.713	22.202	24.983	17.963	15.856	16.781	19.283	20.628	19.363	28.848	32.151	39.76	29.008
687.5	19.382	19.148	16.987	16.644	14.169	18.515	15.728	22.203	23.027	22.458	25.121	18.009	15.859	16.803	19.362	20.672	19.409	28.98	32.274	39.88	29.227
688	19.512	19.239	17.005	16.71	14.219	18.769	15.965	22.524	23.328	22.7	25.336	18.096	15.917	16.826	19.436	20.727	19.451	28.933	32.42	40.118	29.397
688.5	19.63	19.369	17.086	16.833	14.368	19.092	16.121	22.923	23.667	22.901	25.734	18.097	16.01	16.865	19.585	20.713	19.523	29.14	32.582	40.294	29.413
689	19.739	19.452	17.193	16.995	14.484	19.388	16.323	23.386	23.986	23.007	26.1	18.177	16.051	16.883	19.7	20.627	19.548	29.68	32.996	40.498	29.301
689.5	19.854	19.615	17.29	17.179	14.521	19.673	16.547	23.808	24.34	23.076	26.364	18.315	16.043	16.959	19.814	20.62	19.603	30.394	33.642	40.475	29.243
690	19.972	19.693	17.358	17.372	14.462	19.907	16.878	24.291	24.778	23.229	26.717	18.497	16.049	16.953	19.88	20.704	19.63	30.956	34.38	40.481	29.269
690.5	20.052	19.747	17.472	17.607	14.405	20.147	17.192	24.844	25.296	23.477	27.22	18.574	16.206	17.015	19.888	20.759	19.57	31.256	34.504	40.573	29.327
691	20.237	19.735	17.579	17.929	14.422	20.439	17.455	25.535	25.687	23.804	27.739	18.567	16.307	17.082	19.917	20.791	19.558	31.265	34.265	40.865	29.304
691.5	20.342	19.73	17.694	18.32	14.497	20.794	17.722	26.294	26.077	24.087	28.233	18.668	16.46	17.283	20.114	20.841	19.632	31.212	34.557	41.12	29.324
692	20.415	19.782	17.785	18.784	14.623	21.202	18.055	26.961	26.542	24.336	28.777	18.873	16.61	17.552	20.394	20.973	19.808	31.231	35.418	41.452	29.483
692.5	20.49	19.887	17.944	19.195	14.735	21.66	18.506	27.551	27.183	24.587	29.319	19.118	16.869	17.854	20.692	21.109	19.914	31.607	36.298	41.739	29.664
693	20.609	20.031	18.16	19.596	14.791	22.119	18.939	28.124	27.771	24.822	29.782	19.374	17.06	18.092	20.928	21.265	20.043	31.943	36.568	42.029	29.629
693.5	20.739	20.128	18.372	20.023	14.819	22.54	19.361	28.808	28.339	25.076	30.212	19.654	17.236	18.235	21.148	21.446	20.168	32.293	36.623	42.194	29.701
694	20.898	20.218	18.586	20.491	14.954	22.939	19.778	29.486	28.906	25.348	30.661	19.89	17.401	18.423	21.302	21.591	20.302	32.82	36.698	42.531	29.972
694.5	21.127	20.29	18.764	21.014	15.188	23.408	20.225	30.152	29.608	25.704	31.321	20.121	17.659	18.699	21.547	21.79	20.463	33.329	36.921	42.916	30.23
695	21.383	20.485	18.966	21.54	15.415	23.904	20.683	30.837	30.311	26.029	32.087	20.406	17.926	18.943	21.915	21.955	20.635	33.814	37.14	43.288	30.249
695.5	21.622	20.721	19.162	22.128	15.559	24.423	21.151	31.496	30.958	26.376	32.765	20.793	18.254	19.156	22.308	22.166	20.776	33.985	37.564	43.567	30.297
696	21.86	20.963	19.359	22.664	15.644	24.911	21.665	32.13	31.426	26.697	33.273	21.156	18.562	19.366	22.633	22.364	20.997	33.941	38.051	43.979	30.382
696.5	22.087	21.129	19.51	23.184	15.799	25.467	22.218	32.868	31.884	27.137	33.863	21.49	18.866	19.652	22.949	22.605	21.27	33.882	38.514	44.473	30.655
697	22.291	21.26	19.671	23.684	15.998	26.064	22.715	33.672	32.409	27.643	34.593	21.91	19.151	19.992	23.326	22.874	21.568	34.227	38.987	44.874	30.804
697.5	22.581	21.396	19.921	24.218	16.19	26.671	23.199	34.363	33.056	28.132	35.254	22.353	19.423	20.315	23.671	23.182	21.77	34.757	39.425	45.209	31.073
698	22.854	21.555	20.29	24.754	16.302	27.205	23.744	34.861	33.765	28.641	35.681	22.757	19.708	20.661	24.055	23.517	21.995	35.144	39.963	45.571	31.19
698.5	23.143	21.752	20.688	25.302	16.417	27.766	24.365	35.374	34.446	29.039	36.076	22.991	20.045	20.924	24.509	23.807	22.28	35.262	40.275	46.091	31.464
699	23.315	21.993	21.086	25.812	16.589	28.339	24.903	35.97	35.094	29.457	36.494	23.308	20.411	21.27	24.905	24.143	22.649	35.478	40.707	46.497	31.883
699.5	23.63	22.2	21.409	26.366	16.81	28.828	25.351	36.589	35.693	29.882	37.047	23.769	20.827	21.638	25.195	24.554	23.018	35.933	41.444	46.767	32.305
700	23.927	22.385	21.741	26.949	17.032	29.235	25.818	37.189	36.292	30.389	37.679	24.342	21.243	22.065	25.5	24.97	23.419	36.332	42.06	46.998	32.28
700.5	24.291	22.518	22.092	27.619	17.228	29.648	26.379	37.721	36.827	30.776	38.384	24.91	21.668	22.443	26.001	25.351	23.782	36.649	42.473	47.327	32.054
701	24.516	22.637	22.48	28.282	17.446	30.134	26.938	38.269	37.404	31.193	38.98	25.404	22.062	22.842	26.545	25.739	24.17	36.96	42.722	47.767	31.83
701.5	24.727	22.765	22.834	28.893	17.689	30.608	27.51	38.796	37.904	31.577	39.474	25.827	22.399	23.233	27.007	26.206	24.528	37.491	43.19	48.267	31.979
702	24.994	22.968	23.175	29.485	17.935	31.042	27.947	39.389	38.458	32.069	39.865	26.263	22.709	23.607	27.404	26.659	24.893	37.948	43.597	48.746	32.2
702.5	25.292	23.138	23.528	30.068	18.161	31.478	28.364	39.926	38.99	32.544	40.261	26.833	23.007	24.003	27.892	26.988	25.228	38.244	44.036	49.143	32.547
703	25.646	23.363	23.863	30.579	18.349	31.951	28.724	40.48	39.647	33.029	40.61	27.451	23.373	24.43	28.44	27.256	25.578	38.723	44.445	49.352	32.9
703.5	25.925	23.669	24.267	31.003	18.579	32.433	29.186	41.067	40.296	33.483	41.015	27.938	23.758	24.881	28.906	27.606	25.994	39.075	44.669	49.581	33.319
704	26.296	24.036	24.657	31.477	18.776	32.865	29.706	41.67	40.842	33.958	41.397	28.321	24.158	25.273	29.283	28.062	26.423	39.449	44.96	49.869	33.511
704.5	26.654	24.249	24.999	32.04	18.934	33.247	30.259	42.166	41.321	34.454	41.827	28.823	24.505	25.619	29.645	28.537	26.781	39.503	45.215	50.297	33.607
705	26.949	24.339	25.222	32.663	19.076	33.682	30.855	42.541	41.792	34.818	42.259	29.425	24.816	25.942	30.041	28.882	27.202	39.337	45.344	50.755	33.637
705.5	27.269	24.51	25.577	33.278	19.338	34.161	31.301	42.875	42.333	35.175	42.738	29.982	25.264	26.258	30.57	29.245	27.608	39.359	45.745	51.276	33.726
706	27.657	24.796	26.042	33.869	19.655	34.682	31.677	43.2	42.782	35.571	43.154	30.483	25.753	26.686	31.167	29.68	28.035	39.463	46.248	51.733	33.703
706.5	28.019	25.103	26.528	34.453	19.929	35.158	31.977	43.603	43.149	36.086	43.425	30.958	26.244	27.112	31.705	30.265	28.418	39.599	46.871	52.142	33.877
707	28.313	25.29	26.856	34.961	20.162	35.549	32.282	44.041	43.475	36.438	43.65	31.467	26.641	27.496	32.081	30.856	28.902	39.837	47.092	52.395	34.295
707.5	28.556	25.426	27.117	35.437	20.44	35.905	32.605	44.535	43.877	36.84	43.852	31.993	27.066	27.895	32.384	31.362	29.43	40.308	47.117	52.772	34.678
708	28.875	25.56	27.383	35.861	20.707	36.286	32.969	44.874	44.257	37.237	44.173	32.518	27.56	28.371	32.756	31.781	29.961	40.851	47.561	53	34.742
708.5	29.133	25.66	27.649	36.305	20.928	36.689	33.327	45.208	44.65	37.65	44.469	33.097	28.051	28.889	33.221	32.222	30.448	41.259	48.185	53.18	34.45
709	29.393	25.829	28.007	36.737	21.065	37.109	33.674	45.534	45.084	38.067	44.77	33.69	28.52	29.224	33.759	32.638	30.885	41.586	48.931	53.298	34.396
709.5	29.697	25.988	28.449	37.258	21.225	37.488	33.945	45.897	45.49	38.499	45.021	34.205	28.841	29.618	34.202	33.104	31.254	41.846	49.082	53.541	34.608
710	30.054	26.22	28.919	37.804	21.409	37.848	34.291	46.325	45.948	38.992	45.378	34.648	29.144	30.072	34.573	33.615	31.649	41.895	49.14	53.918	35.059
710.5	30.431	26.402	29.338	38.337	21.654	38.142	34.637	46.701	46.428	39.382	45.755	35.057	29.521	30.576	34.979	34.181	32.073	41.881	49.362	54.403	35.32
711	30.749	26.543	29.712	38.703	21.985	38.441	35.008	47.056	46.967	39.692	46.022	35.516	30.006	31.021	35.426	34.736	32.525	41.966	49.704	54.888	35.663
711.5	31.147	26.689	30.079	39.082	22.309	38.776	35.305	47.282	47.401	39.998	46.148	36.056	30.513	31.462	35.925	35.182	33.052	42.089	50.096	55.33	36.174
712	31.53	26.87	30.498	39.539	22.56	39.16	35.616	47.636	47.792	40.335	46.218	36.646	30.938	31.864	36.333	35.551	33.563	42.306	50.361	55.738	36.661
712.5	31.896	27.147	30.914	40.09	22.756	39.516	35.928	48.031	48.216	40.698	46.434	37.274	31.38	32.287	36.788	35.97	34.095	42.616	50.659	56.137	36.715
713	32.166	27.453	31.213	40.593	22.915	39.749	36.141	48.411	48.657	41.035	46.691	37.842	31.789	32.768	37.136	36.498	34.534	42.968	50.98	56.505	36.78
713.5	32.44	27.682	31.45	41.026	23.053	39.889	36.347	48.756	48.981	41.422	47.035	38.318	32.16	33.258	37.555	37.041	34.973	43.348	51.521	56.75	36.761
714	32.597	27.876	31.722	41.473	23.201	40.093	36.529	49.142	49.242	41.848	47.309	38.768	32.463	33.609	37.998	37.481	35.4	43.443	52.018	56.979	37.11
714.5	32.725	28.093	32.116	41.924	23.394	40.441	36.748	49.485	49.437	42.271	47.566	39.128	32.727	33.915	38.374	37.907	35.96	43.733	52.297	57.13	37.382
715	32.974	28.359	32.509	42.33	23.685	40.854	36.942	49.766	49.73	42.662	47.783	39.495	32.993	34.19	38.739	38.316	36.566	43.885	51.998	57.287	37.578
715.5	33.322	28.559	32.908	42.711	23.928	41.214	37.159	49.962	50.026	43.002	47.897	39.891	33.267	34.487	39.137	38.696	37.039	43.857	51.727	57.554	37.62
716	33.691	28.673	33.321	43.055	24.189	41.51	37.395	50.134	50.238	43.229	48.007	40.39	33.679	34.821	39.663	39.083	37.403	43.561	51.659	57.758	37.53
716.5	34.002	28.874	33.767	43.433	24.488	41.806	37.603	50.207	50.408	43.382	48.062	41.025	34.248	35.289	40.122	39.612	37.73	43.447	51.874	57.948	37.696
717	34.32	29.145	34.214	43.779	24.817	42.094	37.923	50.354	50.645	43.657	48.209	41.641	34.849	35.707	40.572	40.185	38.113	43.607	52.185	58.163	38.063
717.5	34.638	29.313	34.623	44.114	25.091	42.409	38.231	50.559	50.927	44.058	48.345	42.228	35.315	36.033	40.974	40.732	38.518	43.794	52.495	58.509	38.564
718	35.022	29.448	34.959	44.438	25.32	42.714	38.492	50.911	51.241	44.498	48.491	42.627	35.621	36.306	41.314	41.287	39.011	43.993	52.747	58.922	38.776
718.5	35.328	29.622	35.218	44.819	25.533	42.998	38.621	51.293	51.632	44.872	48.507	42.998	35.951	36.639	41.684	41.853	39.546	44.461	52.966	59.182	38.625
719	35.594	29.861	35.503	45.335	25.678	43.219	38.716	51.595	52.093	45.193	48.567	43.423	36.339	37.02	42.119	42.335	40.106	45.037	53.465	59.498	38.5
719.5	35.842	30.094	35.839	45.805	25.81	43.33	38.797	51.799	52.493	45.458	48.716	43.917	36.715	37.408	42.543	42.703	40.662	45.592	53.895	59.66	38.571
720	36.202	30.26	36.246	46.19	25.953	43.484	38.86	51.975	52.805	45.689	48.9	44.3	36.968	37.705	42.93	43.101	41.197	45.751	54.148	59.836	38.773
720.5	36.435	30.307	36.661	46.453	26.162	43.693	38.957	52.14	52.998	45.915	48.996	44.674	37.257	38.042	43.258	43.572	41.612	45.571	54.242	59.884	38.961
721	36.646	30.293	37.063	46.628	26.4	44.008	39.164	52.284	53.145	46.093	48.893	45.043	37.621	38.386	43.6	43.995	41.982	45.308	54.217	60.01	38.957
721.5	36.955	30.403	37.205	46.828	26.621	44.064	39.417	52.526	53.342	46.378	48.897	45.522	38.024	38.826	43.832	44.431	42.387	44.993	53.938	60.104	39.196
722	37.391	30.64	37.352	47.099	26.793	44.129	39.622	52.811	53.606	46.719	48.97	45.943	38.377	39.25	44.127	44.818	42.797	44.947	53.728	60.212	39.58
722.5	37.69	30.902	37.614	47.406	26.939	44.254	39.789	53.138	53.874	47.094	49.168	46.377	38.687	39.708	44.47	45.241	43.24	45.252	53.888	60.393	39.921
723	37.865	31.103	38.056	47.685	27.12	44.52	40.018	53.403	54.128	47.436	49.23	46.807	39.01	40.097	44.928	45.798	43.726	45.63	54.274	60.595	40.137
723.5	37.859	31.335	38.418	47.949	27.305	44.775	40.277	53.682	54.333	47.742	49.187	47.276	39.339	40.413	45.446	46.305	44.283	45.96	54.578	60.978	40.301
724	37.958	31.53	38.734	48.262	27.518	45.082	40.495	53.758	54.432	47.988	49.16	47.628	39.655	40.662	45.825	46.796	44.637	46.032	54.863	61.4	40.464
724.5	38.108	31.749	38.972	48.63	27.694	45.337	40.612	53.744	54.471	48.082	49.208	48.006	39.969	40.906	46.125	47.125	44.993	46.16	55.076	61.877	40.47
725	38.347	31.818	39.197	48.954	27.872	45.548	40.721	53.778	54.662	48.105	49.23	48.411	40.192	41.18	46.334	47.466	45.343	46.346	55.509	62.115	40.525
725.5	38.58	31.868	39.491	49.106	28.025	45.616	40.736	53.962	54.959	48.183	49.121	48.818	40.546	41.604	46.521	47.809	45.727	46.488	55.495	62.287	40.754
726	38.889	31.926	39.882	49.278	28.223	45.757	40.782	54.218	55.276	48.362	48.996	49.119	40.835	41.977	46.649	48.223	46.033	46.823	55.662	62.401	40.849
726.5	39.239	32.143	40.219	49.607	28.407	45.877	40.907	54.387	55.512	48.609	49.019	49.418	41.203	42.269	46.857	48.63	46.322	47.012	55.875	62.611	40.861
727	39.49	32.334	40.483	49.933	28.573	45.965	41.132	54.574	55.765	48.83	49.218	49.694	41.423	42.418	47.058	48.943	46.635	47.139	56.342	62.698	40.774
727.5	39.685	32.467	40.715	50.156	28.745	46.111	41.183	54.77	56.017	49.201	49.351	49.973	41.633	42.629	47.332	49.178	46.958	47.044	56.624	62.865	40.717
728	39.844	32.553	41.069	50.357	28.978	46.414	41.279	54.956	56.144	49.545	49.315	50.27	41.753	42.875	47.615	49.557	47.447	47.184	56.889	63.122	40.343
728.5	39.916	32.653	41.364	50.647	29.194	46.67	41.41	55.032	56.223	49.857	49.232	50.586	41.974	43.106	47.96	49.977	47.955	47.227	56.941	63.414	40.235
729	40.047	32.79	41.621	50.94	29.365	46.84	41.59	55.031	56.237	49.909	49.229	50.769	42.182	43.36	48.249	50.431	48.33	47.065	56.829	63.616	40.422
729.5	40.308	32.987	41.816	51.157	29.497	46.977	41.72	55.036	56.182	49.925	49.384	50.976	42.416	43.605	48.519	50.702	48.581	47.182	56.569	63.85	41.047
730	40.602	33.211	41.994	51.407	29.596	47.106	41.811	55.194	56.26	50.12	49.452	51.2	42.616	43.815	48.673	50.925	48.701	47.495	56.736	64.078	41.297
730.5	40.758	33.282	42.206	51.696	29.686	47.159	41.891	55.387	56.527	50.32	49.426	51.448	42.872	43.996	48.689	51.137	48.852	47.586	57.02	64.199	41.675
731	40.855	33.251	42.437	51.95	29.798	47.247	41.941	55.476	56.876	50.539	49.267	51.746	43.103	44.118	48.762	51.436	49.026	47.247	56.985	64.303	41.819
731.5	40.956	33.273	42.668	52.082	29.932	47.337	41.906	55.53	57.061	50.745	49.053	52.109	43.275	44.305	48.926	51.779	49.289	47.151	56.959	64.512	42.076
732	41.118	33.519	42.787	52.095	30.082	47.413	41.895	55.517	57.109	50.96	48.957	52.464	43.403	44.528	49.211	52.026	49.577	47.359	57.153	64.746	42.101
732.5	41.237	33.827	42.868	52.055	30.173	47.399	41.856	55.68	57.16	51.105	48.899	52.696	43.619	44.824	49.554	52.255	49.744	47.492	57.409	64.926	42.118
733	41.342	34.008	42.969	52.143	30.244	47.484	42.012	55.862	57.388	51.227	48.97	52.992	43.796	45.113	49.762	52.428	49.93	47.603	57.626	65.141	42.085
733.5	41.445	33.994	43.201	52.394	30.257	47.587	42.086	56.061	57.574	51.397	48.935	53.309	44.03	45.369	49.898	52.575	50.198	47.707	57.775	65.277	42.155
734	41.589	34.03	43.476	52.689	30.32	47.644	42.173	56.081	57.585	51.445	48.888	53.467	44.127	45.567	49.969	52.647	50.63	47.722	57.76	65.44	42.419
734.5	41.849	34.104	43.738	52.873	30.46	47.668	42.328	56.087	57.524	51.473	48.7	53.592	44.269	45.739	50.129	52.863	51.009	47.591	57.532	65.714	42.649
735	42.088	34.078	43.856	52.979	30.601	47.721	42.554	56.071	57.542	51.446	48.67	53.694	44.414	45.907	50.235	53.06	51.155	47.601	57.358	65.878	42.721
735.5	42.257	34.07	43.981	53.112	30.641	47.836	42.628	56.122	57.765	51.542	48.554	53.872	44.675	46.06	50.414	53.224	51.21	47.896	57.342	65.917	42.457
736	42.237	34.187	44.119	53.237	30.686	47.933	42.594	56.106	57.944	51.606	48.476	54.135	44.919	46.228	50.625	53.483	51.399	48.336	57.735	65.831	42.349
736.5	42.254	34.406	44.26	53.324	30.8	47.969	42.574	56.107	58.011	51.744	48.333	54.529	45.124	46.462	50.8	53.821	51.735	48.541	58.28	65.841	42.272
737	42.338	34.591	44.35	53.499	30.904	48.028	42.625	56.124	57.886	51.864	48.384	54.838	45.238	46.696	50.937	54.074	52.029	48.505	58.523	65.887	42.243
737.5	42.497	34.616	44.465	53.713	31.023	48.225	42.719	56.366	57.925	52.124	48.39	54.979	45.345	46.843	51.068	54.178	52.11	48.516	58.917	66.045	42.259
738	42.534	34.55	44.585	53.798	31.192	48.399	42.837	56.631	58.128	52.256	48.291	54.977	45.431	46.942	51.263	54.258	52.227	48.475	59.101	66.244	42.416
738.5	42.519	34.507	44.764	53.787	31.361	48.478	43.013	56.687	58.266	52.297	48.012	54.986	45.463	47.062	51.338	54.346	52.399	48.594	59.138	66.353	42.631
739	42.651	34.628	44.903	53.843	31.461	48.445	43.162	56.758	58.383	52.299	47.839	55.13	45.416	47.178	51.377	54.598	52.646	48.638	58.693	66.237	42.601
739.5	42.907	34.81	44.98	53.995	31.448	48.471	43.233	56.826	58.479	52.48	47.809	55.409	45.493	47.263	51.422	54.799	52.837	48.558	58.778	66.151	42.63
740	43.216	34.921	44.996	54.041	31.443	48.569	43.117	56.925	58.6	52.663	47.891	55.602	45.671	47.26	51.56	54.859	52.895	48.298	58.75	66.013	42.721
740.5	43.333	34.855	45.037	53.997	31.452	48.723	43.012	56.967	58.588	52.783	47.813	55.618	45.901	47.354	51.697	54.827	52.932	48.304	58.672	66.241	42.657
741	43.379	34.857	45.172	54.039	31.515	48.861	43.042	57.117	58.686	52.782	47.672	55.748	46.054	47.613	51.877	55.009	53.011	48.452	58.525	66.489	42.73
741.5	43.377	35.028	45.329	54.139	31.546	48.973	43.135	57.192	58.951	52.718	47.566	55.881	46.107	47.771	52.001	55.184	53.107	48.678	58.81	66.851	42.748
742	43.473	35.367	45.492	54.21	31.552	49.095	43.224	57.115	59.163	52.733	47.47	55.991	46.183	47.75	52.061	55.434	53.332	48.693	59.132	66.955	42.705
742.5	43.512	35.493	45.586	54.301	31.537	49.196	43.316	57.123	59.323	52.855	47.373	56.044	46.345	47.836	52.146	55.557	53.478	48.652	59.283	67.002	42.631
743	43.632	35.408	45.705	54.395	31.633	49.237	43.473	57.159	59.376	53.054	47.285	56.266	46.462	48.059	52.24	55.679	53.663	48.48	59.175	66.93	42.706
743.5	43.774	35.372	45.892	54.509	31.823	49.27	43.533	57.139	59.362	53.27	47.162	56.404	46.552	48.195	52.344	55.721	53.723	48.296	59.369	66.854	42.82
744	43.871	35.417	45.999	54.638	31.994	49.296	43.546	57.085	59.216	53.362	47.019	56.372	46.635	48.187	52.262	55.803	53.832	48.052	59.565	66.742	42.829
744.5	43.85	35.485	46.03	54.782	31.98	49.279	43.533	57.191	59.202	53.39	46.869	56.336	46.744	48.319	52.253	55.785	53.756	48.144	59.613	66.744	43.248
745	43.72	35.507	46.082	54.784	31.956	49.383	43.553	57.312	59.207	53.321	46.791	56.368	46.708	48.438	52.332	55.744	53.637	48.286	59.465	66.736	43.539
745.5	43.573	35.542	46.177	54.78	32.008	49.492	43.63	57.434	59.321	53.462	46.779	56.481	46.775	48.494	52.512	55.74	53.615	48.472	59.707	66.751	43.544
746	43.406	35.458	46.229	54.822	32.067	49.437	43.725	57.523	59.376	53.558	46.789	56.569	46.87	48.582	52.625	55.785	53.777	48.581	59.911	66.735	43.11
746.5	43.459	35.286	46.196	54.951	32.023	49.282	43.756	57.362	59.399	53.503	46.715	56.709	46.973	48.617	52.66	55.808	53.962	48.723	59.922	66.852	42.982
747	43.636	35.236	46.22	55.099	32.029	49.277	43.68	57.179	59.319	53.322	46.521	56.794	46.965	48.566	52.801	55.868	53.963	48.888	59.744	66.956	42.975
747.5	43.86	35.487	46.173	55.238	32.045	49.373	43.681	57.179	59.165	53.313	46.332	56.813	47.055	48.493	52.826	55.922	53.876	48.978	59.869	67.049	43.169
748	43.967	35.689	46.14	55.231	32.123	49.327	43.87	57.436	59.202	53.516	46.251	56.925	46.973	48.618	52.83	55.924	53.784	48.934	59.973	67.133	43.205
748.5	43.992	35.769	46.127	55.221	32.157	49.258	44.071	57.659	59.439	53.751	46.129	57.14	46.916	48.808	52.907	55.994	53.809	48.552	60.045	67.33	43.224
749	43.993	35.623	46.113	55.197	32.121	49.237	44.142	57.674	59.653	53.847	46.094	57.291	46.991	48.924	53.036	56.097	53.84	48.213	60.161	67.556	43.219
749.5	43.942	35.517	46.155	55.176	32.071	49.291	44.122	57.717	59.669	53.904	46.156	57.189	47.246	48.959	53.01	56.082	53.858	48.221	60.383	67.49	43.329
750	43.94	35.486	46.258	55.054	32.087	49.272	44.142	57.709	59.397	53.829	46.171	57.28	47.414	49.045	52.944	55.972	53.821	48.387	60.362	67.29	43.761
750.5	43.918	35.63	46.362	55.078	32.153	49.296	44.145	57.794	59.318	53.908	46.131	57.455	47.459	49.065	52.982	55.891	53.856	48.63	60.048	67.065	43.902
751	43.953	35.615	46.427	55.105	32.181	49.407	44.148	57.83	59.31	53.941	45.967	57.613	47.424	49.054	53.014	55.907	53.841	48.59	59.791	67.194	43.984
751.5	44.13	35.64	46.429	55.083	32.201	49.586	44.173	57.848	59.389	53.932	45.826	57.53	47.313	48.975	52.966	55.882	53.804	48.5	59.783	67.34	43.949
752	44.354	35.634	46.46	55.079	32.224	49.774	44.163	57.686	59.369	53.874	45.606	57.46	47.296	49	52.997	55.92	53.754	48.709	60.401	67.406	44.101
752.5	44.545	35.7	46.462	55.152	32.238	49.816	44.155	57.446	59.375	53.855	45.491	57.566	47.391	49.116	53.162	55.943	53.777	49.203	61.024	67.344	44.132
753	44.482	35.667	46.493	55.31	32.228	49.782	44.272	57.324	59.325	53.848	45.295	57.834	47.521	49.251	53.325	55.95	53.797	49.231	61.189	67.41	43.973
753.5	44.402	35.654	46.451	55.362	32.239	49.724	44.345	57.309	59.326	53.783	45.193	58.093	47.644	49.299	53.449	55.863	53.901	48.866	60.739	67.621	43.562
754	44.333	35.575	46.454	55.329	32.276	49.749	44.341	57.482	59.323	53.822	45.205	58.175	47.738	49.321	53.395	55.845	53.984	48.422	60.636	67.645	43.341
754.5	44.342	35.434	46.535	55.346	32.336	49.771	44.266	57.676	59.387	54.007	45.301	58.122	47.708	49.367	53.348	55.847	54.07	48.162	60.415	67.553	43.122
755	44.305	35.406	46.606	55.355	32.438	49.731	44.28	57.814	59.511	54.109	45.36	58.07	47.515	49.38	53.232	55.853	54.153	48.329	60.682	67.394	43.208
755.5	44.217	35.529	46.666	55.402	32.543	49.701	44.43	57.696	59.535	54.002	45.43	58.024	47.343	49.304	53.082	55.893	54.302	48.762	60.941	67.499	43.212
756	44.224	35.791	46.645	55.403	32.585	49.701	44.568	57.619	59.559	53.878	45.404	57.974	47.335	49.185	52.939	55.921	54.366	48.881	61.247	67.648	43.511
756.5	44.21	35.821	46.642	55.483	32.49	49.736	44.585	57.592	59.671	53.905	45.356	57.936	47.375	49.109	53.01	55.791	54.172	48.782	61.08	67.831	43.421
757	44.21	35.678	46.662	55.486	32.429	49.784	44.569	57.642	60.002	54.017	45.134	57.829	47.427	49.131	53.067	55.674	54.078	48.854	60.927	67.847	43.371
757.5	44.245	35.625	46.711	55.358	32.436	49.868	44.589	57.54	60.047	53.969	44.914	57.698	47.421	49.126	53.042	55.702	54.105	49.161	60.888	67.823	43.158
758	44.433	35.863	46.741	55.356	32.51	49.916	44.647	57.491	59.834	53.907	44.757	57.695	47.41	49.159	53.035	55.837	54.157	48.897	60.647	67.776	42.938
758.5	44.492	36.113	46.744	55.514	32.553	49.916	44.7	57.547	59.614	53.941	44.665	57.919	47.446	49.282	53.182	55.993	54.077	48.158	60.266	67.8	42.69
759	44.385	36.091	46.764	55.746	32.571	49.881	44.802	57.72	59.549	54.006	44.614	58.17	47.468	49.4	53.331	55.954	54.045	47.749	60.511	67.699	42.73
759.5	44.309	36.043	46.802	55.738	32.564	49.863	44.83	57.821	59.446	54.004	44.617	58.251	47.425	49.382	53.299	55.806	54.103	48.017	61.098	67.629	42.873
760	44.328	35.952	46.83	55.625	32.556	49.89	44.819	57.722	59.382	54.054	44.592	58.234	47.459	49.375	53.147	55.663	54.125	48.608	61.354	67.621	43.158
760.5	44.372	35.855	46.854	55.467	32.6	49.961	44.854	57.701	59.424	54.208	44.46	58.251	47.541	49.365	53.088	55.758	54.146	48.736	61.049	67.737	43.433
761	44.382	35.716	46.894	55.434	32.662	50.02	44.947	57.867	59.576	54.397	44.174	58.378	47.632	49.326	53.136	55.884	54.146	48.745	60.78	67.903	43.659
761.5	44.453	35.808	46.887	55.476	32.672	50.017	45.015	58.121	59.828	54.38	43.969	58.492	47.661	49.328	53.173	55.971	54.15	48.489	60.627	67.985	43.747
762	44.553	35.815	46.907	55.522	32.61	50.032	45.008	57.93	59.921	54.249	43.917	58.594	47.848	49.472	53.304	55.835	54.049	48.796	60.76	67.83	43.761
762.5	44.639	35.804	46.929	55.472	32.542	50.09	44.992	57.692	59.833	54.08	43.962	58.516	47.912	49.489	53.391	55.617	54.03	49.133	61.001	67.632	43.617
763	44.506	35.726	47.032	55.5	32.538	50.154	45.085	57.558	59.631	54.039	43.958	58.458	47.859	49.351	53.383	55.496	54.049	49.48	61.032	67.614	43.661
763.5	44.29	35.749	47.118	55.562	32.551	50.174	45.157	57.632	59.507	54.006	44.024	58.433	47.863	49.388	53.369	55.416	53.98	49.435	60.853	67.8	43.728
764	44.135	35.792	47.136	55.617	32.609	50.214	45.189	57.768	59.478	54.006	44.059	58.468	48.005	49.472	53.53	55.368	53.866	49.459	60.933	67.957	43.578
764.5	44.26	35.833	47.025	55.657	32.579	50.286	45.11	57.91	59.627	54.017	44.039	58.591	48.127	49.518	53.664	55.292	53.816	49.658	61.269	68.015	43.374
765	44.383	35.86	47.002	55.652	32.556	50.434	45.102	57.81	59.651	54	43.848	58.781	48.085	49.468	53.645	55.315	53.824	50.041	61.327	68.055	43.569
765.5	44.576	35.908	47.078	55.728	32.505	50.554	45.14	57.68	59.69	54.109	43.687	58.838	47.942	49.548	53.492	55.345	53.75	49.704	61.287	68.089	43.918
766	44.664	36.1	47.056	55.755	32.547	50.529	45.178	57.678	59.652	54.159	43.64	58.701	47.763	49.622	53.428	55.322	53.636	48.974	61.47	68.132	44.093
766.5	44.661	36.194	46.918	55.698	32.588	50.404	45.195	57.783	59.661	54.076	43.598	58.573	47.738	49.608	53.52	55.332	53.616	48.272	61.433	67.904	44.105
767	44.584	36.124	46.786	55.625	32.597	50.299	45.247	57.837	59.65	54.013	43.525	58.51	47.822	49.553	53.58	55.274	53.592	48.481	61.021	67.726	43.946
767.5	44.556	35.972	46.72	55.632	32.5	50.257	45.405	57.814	59.665	54.029	43.404	58.474	47.938	49.549	53.426	55.268	53.634	48.597	60.708	67.643	43.685
768	44.582	35.864	46.801	55.735	32.399	50.234	45.459	57.848	59.675	54.187	43.414	58.494	47.938	49.567	53.279	55.231	53.687	48.706	60.922	67.673	43.439
768.5	44.507	35.767	46.942	55.721	32.473	50.262	45.447	57.811	59.611	54.175	43.506	58.372	47.889	49.431	53.194	55.198	53.687	48.723	61.315	67.626	43.433
769	44.671	35.742	46.948	55.705	32.574	50.278	45.484	57.756	59.582	54.174	43.518	58.376	47.822	49.376	53.318	55.175	53.671	49.239	61.311	67.624	43.38
769.5	44.72	35.811	46.904	55.663	32.653	50.293	45.519	57.825	59.615	54.177	43.409	58.462	47.868	49.381	53.422	55.139	53.75	49.292	61.107	67.811	43.359
770	44.688	35.988	46.944	55.606	32.657	50.235	45.514	57.948	59.584	54.285	43.278	58.685	47.895	49.549	53.546	55.081	53.796	49.133	61.173	68.025	43.511
770.5	44.555	36.096	47.12	55.589	32.674	50.172	45.437	58.116	59.545	54.35	43.258	58.743	47.994	49.717	53.545	55.036	53.748	49.014	61.475	68.027	43.491
771	44.521	36.07	47.249	55.631	32.692	50.097	45.384	58.084	59.574	54.361	43.214	58.709	47.983	49.832	53.604	55.104	53.692	49.014	61.48	67.79	43.427
771.5	44.524	36.065	47.132	55.643	32.707	50.154	45.487	57.923	59.73	54.307	43.151	58.575	47.949	49.712	53.659	55.154	53.751	48.912	61.577	67.756	43.51
772	44.552	36.195	46.89	55.657	32.736	50.27	45.611	57.846	59.814	54.364	43.124	58.592	47.832	49.502	53.615	55.185	53.805	48.761	61.599	67.934	43.892
772.5	44.538	36.21	46.795	55.777	32.772	50.22	45.679	57.814	59.857	54.375	43.202	58.552	47.736	49.379	53.573	55.183	53.794	49.021	61.928	68.013	43.854
773	44.536	36.233	46.946	55.957	32.796	50.127	45.66	57.818	59.924	54.433	43.111	58.565	47.705	49.453	53.525	55.217	53.709	49.268	62.099	67.982	43.748
773.5	44.584	36.174	47.107	56.011	32.734	50.082	45.709	57.828	59.834	54.449	42.917	58.469	47.685	49.501	53.409	55.227	53.653	49.325	62.423	67.855	43.648
774	44.616	36.182	47.209	55.937	32.686	50.175	45.757	57.932	59.815	54.489	42.853	58.442	47.72	49.579	53.343	55.136	53.71	49.147	62.661	67.894	43.757
774.5	44.493	36.145	47.256	55.795	32.753	50.328	45.795	57.979	59.899	54.487	42.882	58.553	47.836	49.675	53.342	55.038	53.835	49.084	62.833	67.942	43.716
775	44.464	36.091	47.2	55.654	32.835	50.35	45.759	57.89	59.989	54.419	42.962	58.632	47.876	49.689	53.476	54.998	53.779	49.12	62.623	67.882	43.536
775.5	44.49	36.006	47.218	55.532	32.939	50.409	45.755	57.946	60.134	54.438	43.019	58.656	47.836	49.72	53.548	55.14	53.719	49.193	62.221	67.79	43.268
776	44.688	36.275	47.208	55.508	32.907	50.429	45.866	57.932	59.982	54.397	43.024	58.643	47.795	49.769	53.609	55.273	53.642	49.095	61.682	67.856	43.004
776.5	44.77	36.519	47.22	55.57	32.837	50.546	45.93	58.104	59.967	54.476	42.928	58.813	47.913	49.975	53.628	55.352	53.607	49.36	61.354	67.903	42.86
777	44.848	36.472	47.194	55.66	32.752	50.489	45.892	58.195	60.007	54.582	42.777	58.96	48.03	50.086	53.583	55.184	53.448	49.542	61.541	67.845	43.28
777.5	44.94	36.402	47.253	55.688	32.64	50.342	45.849	58.202	60.218	54.559	42.743	58.913	47.835	49.99	53.424	55.006	53.372	49.441	61.7	67.977	43.609
778	44.882	36.289	47.246	55.648	32.596	50.242	45.93	58.046	60.147	54.415	42.723	58.796	47.482	49.738	53.236	54.88	53.397	49.62	62.049	68.075	43.875
778.5	44.692	36.203	47.175	55.648	32.638	50.255	45.994	58.101	60.008	54.366	42.679	58.72	47.319	49.495	53.126	54.837	53.404	49.959	62.432	68.115	43.759
779	44.603	36.117	47.143	55.712	32.718	50.249	45.985	58.132	59.878	54.366	42.656	58.7	47.456	49.492	53.217	54.742	53.502	50.187	62.504	67.988	43.57
779.5	44.65	36.136	47.163	55.746	32.735	50.05	45.972	58.055	59.939	54.348	42.678	58.751	47.662	49.518	53.31	54.693	53.537	49.356	62.081	68.029	43.28
780	44.669	36.093	47.177	55.633	32.7	50.043	45.984	57.926	59.97	54.37	42.663	58.927	47.874	49.581	53.348	54.602	53.506	48.896	61.999	68.023	43.189
780.5	44.675	35.959	47.192	55.587	32.691	50.197	46.094	57.929	60.081	54.554	42.603	59.08	47.958	49.597	53.427	54.728	53.372	48.891	62.231	68.193	43.178
781	44.673	35.992	47.221	55.605	32.754	50.42	46.093	57.851	60.136	54.648	42.493	59.141	48.033	49.697	53.471	54.822	53.262	49.005	62.425	68.237	43.279
781.5	44.649	36.065	47.16	55.733	32.87	50.604	46.134	57.813	60.091	54.634	42.44	59.083	47.912	49.719	53.519	54.804	53.068	48.677	62.435	68.199	43.289
782	44.7	36.205	47.166	55.929	32.966	50.727	46.158	57.861	59.999	54.631	42.419	59.052	47.829	49.667	53.525	54.687	52.958	48.406	62.217	68.089	43.168
782.5	44.773	36.262	47.221	56.076	32.972	50.7	46.246	57.852	59.936	54.619	42.39	58.993	47.773	49.612	53.501	54.739	52.987	48.467	62.126	67.925	43.046
783	44.805	36.211	47.179	56.073	32.874	50.533	46.163	57.916	59.989	54.646	42.37	59.011	47.879	49.616	53.453	54.71	53.053	48.439	62.167	67.78	43.145
783.5	44.809	36.103	47.027	55.889	32.731	50.433	45.965	58.044	60.006	54.589	42.361	59.052	47.956	49.742	53.426	54.617	53.066	48.385	62.354	67.66	43.185
784	44.723	35.97	46.966	55.645	32.715	50.466	45.908	57.992	59.978	54.415	42.302	59.061	47.951	49.876	53.38	54.544	53.107	48.626	63.028	67.736	43.079
784.5	44.626	35.999	47.146	55.57	32.846	50.684	46.154	57.874	60.035	54.38	42.165	59.12	47.91	49.937	53.398	54.501	53.161	48.937	63.244	67.817	43.154
785	44.584	36.115	47.251	55.553	32.889	50.729	46.347	57.822	59.991	54.455	42.152	59.159	47.888	49.842	53.534	54.287	53.013	49.275	63.227	67.858	43.338
785.5	44.621	36.224	47.326	55.533	32.905	50.717	46.421	57.935	60.013	54.622	42.247	59.096	47.879	49.742	53.596	54.288	53.006	49.778	63.163	67.83	43.23
786	44.636	36.18	47.392	55.479	32.909	50.628	46.354	57.928	59.984	54.634	42.246	58.926	47.859	49.655	53.638	54.449	53.127	50.012	63.203	67.892	43.206
786.5	44.643	36.142	47.449	55.527	32.873	50.621	46.375	57.941	60.117	54.66	42.128	58.921	47.905	49.641	53.665	54.618	53.204	49.433	62.579	67.888	43.169
787	44.688	36.137	47.466	55.633	32.814	50.666	46.411	57.972	60.238	54.693	42.048	59.024	47.815	49.631	53.631	54.554	53.055	48.791	61.922	67.95	43.239
787.5	44.741	36.242	47.421	55.732	32.81	50.75	46.557	57.951	60.281	54.601	42.025	59.139	47.81	49.724	53.585	54.457	52.912	49.137	61.775	67.995	43.214
788	44.737	36.191	47.363	55.798	32.798	50.775	46.534	57.794	60.212	54.537	42.003	59.137	47.876	49.751	53.527	54.422	52.89	49.459	61.984	67.984	43.376
788.5	44.768	36.101	47.298	55.853	32.73	50.786	46.321	57.639	60.091	54.575	41.979	59.181	48.027	49.721	53.519	54.502	53.051	49.011	62.079	67.662	43.324
789	44.779	36.046	47.276	55.921	32.614	50.748	46.153	57.566	59.948	54.526	42.018	59.128	47.931	49.612	53.441	54.581	53.193	48.797	62.595	67.579	43.292
789.5	44.864	36.223	47.273	55.954	32.659	50.78	46.063	57.678	59.938	54.438	42.108	59.086	47.831	49.655	53.442	54.584	53.203	49.019	63.08	67.648	43.373
790	44.791	36.232	47.309	55.895	32.725	50.79	46.077	57.715	59.837	54.259	42.128	59.148	47.828	49.679	53.478	54.556	53.116	49.134	63.479	67.879	43.534
790.5	44.821	36.123	47.321	55.879	32.683	50.674	46.093	57.75	59.817	54.211	41.952	59.16	47.781	49.571	53.53	54.573	52.973	48.987	63.075	67.846	43.653
791	44.989	36.102	47.419	55.874	32.632	50.555	46.205	57.677	59.832	54.279	41.791	58.956	47.657	49.355	53.476	54.574	52.843	49.011	62.671	67.861	43.55
791.5	45.043	36.187	47.512	55.904	32.638	50.522	46.463	57.725	60.06	54.472	41.722	58.849	47.685	49.439	53.439	54.448	52.797	49.141	62.383	67.751	43.428
792	44.922	36.196	47.584	55.99	32.69	50.677	46.726	57.671	60.069	54.464	41.746	59.028	47.835	49.64	53.429	54.198	52.742	49.205	62.337	67.701	43.196
792.5	44.908	36.195	47.48	56.047	32.748	50.805	46.712	57.639	59.875	54.326	41.807	59.214	47.821	49.694	53.407	54.088	52.685	49.299	62.606	67.706	43.068
793	44.947	36.252	47.354	56.023	32.784	50.845	46.658	57.634	59.766	54.287	41.797	59.193	47.708	49.572	53.34	54.12	52.721	49.227	62.998	67.745	43.308
793.5	44.902	36.314	47.331	55.902	32.763	50.84	46.685	57.581	59.934	54.352	41.736	59.065	47.619	49.489	53.442	54.198	52.768	49.098	63.235	67.721	43.743
794	44.846	36.223	47.356	55.814	32.725	50.74	46.65	57.62	60.087	54.334	41.615	59.025	47.648	49.544	53.544	54.154	52.642	48.549	62.638	67.481	43.721
794.5	44.918	36.269	47.223	55.73	32.748	50.739	46.684	57.801	59.975	54.149	41.585	59.148	47.768	49.782	53.624	54.13	52.577	48.548	62.258	67.231	43.511
795	44.989	36.164	47.182	55.733	32.752	50.669	46.861	57.907	59.869	54.024	41.495	59.261	47.832	49.851	53.585	54.131	52.619	49.016	62.219	67.303	43.352
795.5	44.956	36.043	47.281	55.733	32.809	50.684	47.053	57.802	59.82	54.12	41.504	59.203	47.829	49.825	53.527	54.165	52.646	49.31	62.48	67.602	43.189
796	44.925	35.979	47.448	55.716	32.918	50.737	46.982	57.775	59.841	54.259	41.587	59.086	47.786	49.789	53.468	54.268	52.648	49.164	62.633	67.63	42.911
796.5	44.911	36.168	47.485	55.628	32.962	50.831	46.878	57.796	59.95	54.333	41.716	59.142	47.822	49.844	53.455	54.399	52.768	48.818	63.022	67.499	43.05
797	45.002	36.28	47.353	55.572	32.934	50.7	46.841	57.733	60.051	54.313	41.768	59.345	47.941	50.008	53.618	54.369	52.817	48.892	63.469	67.466	43.316
797.5	45.025	36.222	47.169	55.593	32.827	50.492	46.879	57.655	60.108	54.266	41.773	59.411	48.059	50.015	53.717	54.359	52.809	49.257	63.868	67.541	43.529
798	44.917	36.119	47.039	55.657	32.727	50.451	46.848	57.639	60.038	54.223	41.806	59.422	48.025	49.96	53.724	54.271	52.836	49.361	63.572	67.545	43.367
798.5	44.696	36.215	46.987	55.675	32.571	50.568	46.791	57.69	60.117	54.322	41.777	59.367	47.867	49.839	53.692	54.258	52.87	48.747	63.037	67.527	43.097
799	44.512	36.291	47.08	55.692	32.563	50.693	46.853	57.674	60.078	54.424	41.674	59.272	47.826	49.741	53.612	54.153	52.806	48.483	62.81	67.502	43.005
799.5	44.59	36.408	47.181	55.741	32.656	50.684	47.007	57.698	60.164	54.489	41.523	59.198	47.979	49.69	53.594	54.151	52.726	49.057	63.374	67.675	43.168
800	44.661	36.413	47.251	55.697	32.828	50.672	47.213	57.807	60.292	54.56	41.475	59.354	48.161	49.846	53.69	54.122	52.764	49.707	63.497	67.715	43.249
800.5	44.691	36.388	47.333	55.542	32.858	50.574	47.174	57.91	60.384	54.525	41.394	59.427	48.09	49.94	53.631	54.185	52.674	50.021	63.386	67.668	43.128
801	44.508	36.288	47.381	55.576	32.843	50.501	47.083	57.866	60.326	54.362	41.4	59.312	47.933	49.948	53.622	54.19	52.588	50.027	63.192	67.683	43.332
801.5	44.449	36.295	47.37	55.746	32.748	50.594	47.025	57.901	60.257	54.258	41.381	59.269	47.874	49.805	53.694	54.158	52.55	49.645	63.391	67.667	43.351
802	44.423	36.25	47.355	55.75	32.733	50.788	47.199	58.015	60.209	54.339	41.343	59.461	47.895	49.716	53.744	53.964	52.547	49.209	63.503	67.487	43.178
802.5	44.586	36.229	47.382	55.653	32.722	50.921	47.383	58.019	60.099	54.35	41.206	59.533	47.891	49.658	53.73	53.888	52.575	48.907	63.394	67.294	42.896
803	44.771	36.19	47.312	55.628	32.639	50.796	47.363	57.929	60.112	54.336	41.136	59.367	47.909	49.774	53.715	53.752	52.62	48.794	63.25	67.209	43.036
803.5	44.903	36.113	47.231	55.614	32.536	50.666	47.222	57.899	60.224	54.49	41.104	59.278	47.965	49.895	53.512	53.734	52.641	48.828	63.203	67.11	43.329
804	44.99	36.142	47.121	55.564	32.519	50.604	47.197	57.791	60.133	54.622	41.06	59.289	47.969	49.966	53.483	53.659	52.618	49.315	63.341	67.131	43.478
804.5	45.093	36.129	47.069	55.7	32.596	50.619	47.285	57.786	60.058	54.549	41.049	59.334	47.865	49.782	53.54	53.684	52.638	49.388	63.35	67.194	43.179
805	45.087	36.172	47.067	56.003	32.707	50.602	47.307	57.663	60.062	54.308	41.095	59.301	47.724	49.618	53.6	53.836	52.56	49.461	63.635	67.124	42.936
805.5	44.952	36.179	47.171	56.176	32.826	50.682	47.222	57.468	60.071	54.116	41.19	59.176	47.653	49.562	53.549	54.027	52.265	49.292	63.696	67.016	42.981
806	44.751	36.226	47.348	56.13	32.94	50.888	47.216	57.368	60.22	54.128	41.208	59.205	47.656	49.609	53.498	54.058	52.082	49.51	63.737	67.05	42.958
806.5	44.731	36.207	47.407	55.988	32.9	50.934	47.35	57.442	60.273	54.172	41.187	59.349	47.784	49.619	53.61	54.029	52.186	49.484	63.824	67.134	42.756
807	44.803	36.141	47.252	55.857	32.864	50.763	47.365	57.57	60.179	54.249	41.11	59.52	47.896	49.639	53.722	54.014	52.322	49.43	64.124	66.964	43.078
807.5	44.824	35.984	47.075	55.771	32.807	50.582	47.283	57.697	60.223	54.309	41.045	59.556	48.031	49.896	53.8	53.999	52.417	48.81	63.688	66.865	43.32
808	44.845	36.031	47.106	55.783	32.78	50.538	47.206	57.79	60.295	54.378	40.896	59.487	48.122	49.992	53.749	54.014	52.517	48.916	63.444	66.823	43.571
808.5	44.788	36.163	47.244	55.776	32.667	50.602	47.135	57.887	60.407	54.465	40.816	59.374	48.03	49.984	53.69	53.868	52.491	48.829	63.262	66.854	43.669
809	44.714	36.216	47.371	55.654	32.601	50.649	47.096	57.841	60.306	54.361	40.806	59.352	47.93	49.884	53.692	53.717	52.356	48.965	63.252	66.811	43.962
809.5	44.649	36.121	47.45	55.531	32.702	50.697	47.23	57.802	60.204	54.246	40.794	59.527	47.921	49.89	53.734	53.729	52.26	48.888	63.145	66.801	43.707
810	44.718	36.19	47.523	55.553	32.852	50.66	47.425	57.793	60.092	54.172	40.808	59.693	47.967	49.913	53.788	53.817	52.231	49.455	63.559	66.745	43.408
810.5	44.786	36.323	47.466	55.785	32.871	50.637	47.38	57.761	60.086	54.203	40.739	59.646	47.948	49.893	53.827	53.807	52.05	49.512	63.814	66.645	43.474
811	44.713	36.315	47.255	56.032	32.754	50.611	47.29	57.743	60.225	54.257	40.77	59.424	47.991	49.797	53.825	53.935	52.125	49.155	63.826	66.669	43.669
811.5	44.598	36.28	47.068	56.041	32.637	50.549	47.321	57.771	60.316	54.312	40.931	59.332	47.971	49.584	53.72	54.082	52.368	49.086	63.754	66.925	43.38
812	44.543	36.188	47.03	55.851	32.551	50.5	47.445	57.693	60.34	54.306	41.007	59.329	47.87	49.51	53.427	54.07	52.458	49.554	64.092	67.014	43.273
812.5	44.663	36.097	47.037	55.636	32.517	50.489	47.584	57.567	60.307	54.277	40.959	59.427	47.824	49.587	53.251	53.804	52.276	49.505	64.257	66.911	43.026
813	44.758	36.019	47.002	55.448	32.549	50.461	47.62	57.673	60.39	54.32	40.795	59.425	47.736	49.661	53.266	53.571	52.241	49.4	64.063	66.842	42.747
813.5	44.879	36.043	46.964	55.365	32.647	50.403	47.704	57.792	60.422	54.281	40.642	59.504	47.739	49.638	53.397	53.517	52.363	49.489	63.873	66.843	42.622
814	44.844	36.072	47.003	55.454	32.688	50.381	47.762	57.78	60.401	54.247	40.603	59.563	47.751	49.679	53.537	53.478	52.329	49.53	64.114	66.723	42.919
814.5	44.803	36.053	47.082	55.593	32.701	50.468	47.805	57.576	60.381	54.221	40.642	59.599	47.817	49.798	53.626	53.464	52.277	49.486	64.569	66.597	43.13
815	44.715	36.084	47.14	55.674	32.745	50.665	47.835	57.497	60.363	54.204	40.585	59.565	47.821	49.912	53.691	53.488	52.253	49.258	64.513	66.589	43.404
815.5	44.691	36.224	47.101	55.671	32.702	50.801	47.821	57.698	60.275	54.107	40.475	59.561	47.754	49.776	53.628	53.607	52.239	49.266	64.386	66.452	43.77
816	44.788	36.467	47.046	55.689	32.681	50.849	47.789	57.952	60.205	54.101	40.421	59.488	47.658	49.577	53.471	53.579	52.145	49.249	64.072	66.243	43.859
816.5	44.897	36.538	46.991	55.692	32.654	50.746	47.711	57.886	60.116	54.003	40.361	59.525	47.77	49.692	53.466	53.617	52.167	49.221	64.26	66.187	43.686
817	44.839	36.467	47.071	55.628	32.615	50.605	47.702	57.612	59.989	54.045	40.369	59.605	47.903	49.927	53.564	53.611	52.207	48.969	64.162	66.245	43.45
817.5	44.665	36.357	47.297	55.529	32.629	50.706	47.838	57.326	59.916	54.131	40.4	59.655	47.879	49.889	53.517	53.68	52.234	49.147	63.995	66.148	43.465
818	44.553	36.333	47.325	55.529	32.752	50.964	48.021	57.445	60.106	54.215	40.357	59.698	47.775	49.705	53.42	53.664	52.218	49.33	63.764	66.115	43.354
818.5	44.658	36.319	47.217	55.525	32.854	51.043	47.999	57.768	60.24	54.125	40.272	59.647	47.645	49.584	53.295	53.575	52.194	49.373	63.825	66.16	43.231
819	44.732	36.396	47.197	55.447	32.818	50.929	47.74	57.855	60.446	54.104	40.306	59.707	47.508	49.414	53.251	53.545	52.135	49.099	63.933	66.19	43.319
819.5	44.815	36.347	47.252	55.655	32.795	50.911	47.67	57.7	60.383	54.205	40.325	59.591	47.32	49.253	53.294	53.567	52.093	49.203	64.439	66.129	43.294
820	44.9	36.251	47.258	55.844	32.754	50.958	47.785	57.568	60.179	54.204	40.184	59.652	47.429	49.42	53.547	53.412	52.003	49.622	64.681	66.184	42.747
820.5	44.867	36.309	47.28	55.836	32.784	51.054	47.777	57.674	59.926	54.101	40.05	59.507	47.583	49.739	53.599	53.149	52.1	49.964	64.851	66.199	42.454
821	44.828	36.475	47.241	55.735	32.762	50.861	47.711	57.686	59.992	53.951	40.025	59.498	47.617	50.006	53.54	53.024	52.066	50.276	64.937	66.264	42.725
821.5	44.858	36.542	47.172	55.827	32.663	50.741	47.594	57.534	60.118	53.925	40.054	59.541	47.538	50.04	53.677	53.209	52.04	50.507	65.061	66.371	43.138
822	45.042	36.537	47.256	55.947	32.515	50.682	47.546	57.486	60.258	54.006	39.981	59.742	47.726	50.065	53.844	53.46	52.053	50.389	64.936	66.547	43.302
822.5	44.901	36.477	47.341	55.963	32.555	50.778	47.734	57.588	60.117	54.155	39.911	59.591	47.895	49.867	53.85	53.572	52.119	49.895	64.859	66.659	43.049
823	44.765	36.425	47.379	55.884	32.706	50.888	47.866	57.686	60.03	54.185	39.889	59.487	47.875	49.866	53.725	53.677	52.154	49.324	64.548	66.471	42.605
823.5	44.643	36.283	47.296	55.887	32.781	51.002	47.959	57.495	60.062	54.027	39.823	59.77	47.671	49.984	53.668	53.697	52.166	49.197	64.366	66.257	42.479
824	44.658	36.233	47.098	55.849	32.68	50.976	48.019	57.202	60.261	53.926	39.806	60.039	47.669	50.043	53.67	53.597	52.087	49.373	63.931	66.089	42.81
824.5	44.618	36.256	47.015	55.718	32.724	50.852	48.011	57.257	60.458	54.046	39.772	59.892	47.626	49.847	53.57	53.491	51.905	49.367	63.936	66.199	42.891
825	44.606	36.236	47.167	55.641	32.886	50.858	47.931	57.432	60.376	54.242	39.709	59.789	47.577	49.807	53.443	53.415	51.851	49.05	64.333	66.263	42.587
825.5	44.521	36.175	47.203	55.772	32.901	50.902	47.969	57.613	60.246	54.452	39.713	59.721	47.476	49.831	53.326	53.241	51.906	48.765	64.262	66.155	42.478
826	44.455	36.244	47.136	55.843	32.753	50.812	48.094	57.713	60.177	54.501	39.761	59.607	47.515	49.758	53.309	53.065	51.943	48.714	63.794	66.022	42.612
826.5	44.475	36.235	47.118	55.806	32.635	50.686	48.099	57.868	60.336	54.452	39.778	59.549	47.588	49.674	53.388	53.076	51.967	49.084	63.705	65.95	42.711
827	44.579	36.208	47.103	55.802	32.629	50.641	48.155	57.62	60.333	54.288	39.778	59.729	47.654	49.684	53.37	53.094	51.977	49.407	64.051	65.841	42.967
827.5	44.743	36.24	47.027	55.809	32.669	50.681	48.211	57.415	60.279	54.108	39.737	59.893	47.604	49.725	53.4	53.182	52.035	49.993	64.439	65.72	43.187
828	44.681	36.28	46.977	55.751	32.664	50.745	48.188	57.242	60.281	53.979	39.56	59.79	47.51	49.602	53.46	53.241	51.984	50.037	64.45	65.916	43.232
828.5	44.509	36.165	46.903	55.71	32.632	50.68	48.168	57.141	60.212	53.961	39.478	59.66	47.422	49.462	53.489	53.221	51.895	49.948	64.585	65.963	43.226
829	44.47	36.093	46.893	55.641	32.665	50.574	48.194	57.097	60.155	54.088	39.426	59.659	47.469	49.446	53.43	53.129	51.826	49.628	64.437	65.703	43.424
829.5	44.73	36.237	47.007	55.503	32.728	50.644	48.208	57.056	59.991	54.023	39.373	59.837	47.648	49.528	53.275	53.195	51.853	49.474	64.38	65.493	43.446
830	44.83	36.325	47.12	55.477	32.804	50.853	48.255	57.069	60.001	53.889	39.333	60.096	47.824	49.653	53.343	53.185	51.877	49.51	64.387	65.59	43.359
830.5	44.816	36.324	47.073	55.665	32.788	50.935	48.31	57.198	60.167	53.824	39.357	60.181	47.82	49.592	53.527	53.235	51.91	49.459	64.646	65.617	43.125
831	44.784	36.264	46.965	55.752	32.759	50.848	48.241	57.353	60.159	53.948	39.295	60.131	47.809	49.519	53.828	53.109	51.896	48.866	64.553	65.489	42.903
831.5	44.669	36.119	46.881	55.738	32.743	50.776	48.13	57.297	59.99	54.005	39.189	60.048	47.848	49.68	53.905	52.983	51.855	48.798	64.627	65.51	42.698
832	44.556	36.066	46.877	55.721	32.738	50.656	48.211	57.194	59.983	53.835	39.117	60.146	47.937	49.906	53.859	52.926	51.847	48.993	64.916	65.588	42.871
832.5	44.459	36.217	46.901	55.66	32.695	50.519	48.338	57.202	60.291	53.763	39.083	60.079	47.863	49.82	53.67	52.98	51.826	49.145	64.888	65.779	42.878
833	44.303	36.335	47.034	55.501	32.679	50.586	48.223	57.217	60.254	53.718	39.079	59.717	47.639	49.467	53.539	52.874	51.644	49.08	64.032	65.851	42.649
833.5	44.309	36.215	47.136	55.427	32.68	50.806	48.22	57.177	60.115	53.769	39.005	59.638	47.508	49.362	53.492	52.854	51.465	49.251	63.887	65.721	42.563
834	44.357	36.005	47.094	55.443	32.654	50.839	48.397	57.122	60.181	53.887	38.978	59.842	47.483	49.477	53.424	52.919	51.447	49.681	64.627	65.772	43.01
834.5	44.469	36.067	47.112	55.579	32.65	50.837	48.611	57.337	60.366	54.013	39.016	60.116	47.464	49.601	53.471	52.997	51.486	50.061	64.951	65.803	42.931
835	44.589	36.312	47.194	55.609	32.693	50.845	48.512	57.398	60.373	54.012	39.092	60.129	47.41	49.535	53.491	53.017	51.704	49.91	64.435	65.604	42.843
835.5	44.568	36.265	47.199	55.527	32.79	50.826	48.431	57.288	60.296	54.006	39.047	59.905	47.449	49.472	53.371	52.939	51.815	49.068	63.999	65.312	42.865
836	44.629	36.151	47.113	55.45	32.835	50.764	48.353	57.068	60.207	54.006	38.962	59.609	47.519	49.464	53.21	52.869	51.655	48.989	64.362	65.266	43.056
836.5	44.459	36.005	47.236	55.549	32.903	50.897	48.307	56.908	60.085	53.859	38.931	59.573	47.634	49.633	53.365	52.829	51.546	49.496	64.882	65.447	43.472
837	44.345	35.981	47.379	55.792	32.851	51.079	48.315	57.03	60.102	53.777	38.944	59.603	47.546	49.72	53.49	52.788	51.535	49.77	64.737	65.335	43.801
837.5	44.379	35.932	47.377	55.963	32.733	51.186	48.393	57.25	60.168	53.977	38.892	59.843	47.631	49.89	53.446	52.667	51.629	49.695	64.006	65.36	43.646
838	44.493	36.105	47.349	55.872	32.58	51.131	48.548	57.347	60.15	54.02	38.698	59.917	47.548	49.704	53.363	52.74	51.709	49.622	64.062	65.388	43.192
838.5	44.555	36.209	47.353	55.728	32.546	51.09	48.546	57.248	60.206	53.909	38.529	60.009	47.5	49.475	53.383	52.866	51.667	49.555	65.041	65.342	42.955
839	44.59	36.199	47.335	55.883	32.617	51.016	48.587	57.264	60.297	53.86	38.47	59.897	47.472	49.404	53.379	52.856	51.604	49.432	65.615	65.005	43.07
839.5	44.54	36.122	47.299	55.859	32.794	50.942	48.559	57.083	60.275	53.973	38.484	59.84	47.52	49.649	53.415	52.653	51.475	49.387	65.354	64.921	43.304
840	44.562	36.324	47.181	55.607	32.88	50.921	48.488	56.916	60.068	53.851	38.484	59.698	47.508	49.603	53.446	52.448	51.341	49.248	65.226	65.284	43.222
840.5	44.55	36.406	47.085	55.583	32.875	50.973	48.519	57.14	60.092	53.828	38.477	59.676	47.687	49.485	53.418	52.471	51.357	49.418	65.638	65.542	43.311
841	44.699	36.455	46.916	55.85	32.682	50.828	48.53	57.298	60.151	53.814	38.539	59.551	47.597	49.369	53.185	52.598	51.552	49.816	65.684	65.469	43.175
841.5	44.797	36.308	46.926	56.055	32.464	50.691	48.505	57.104	60.091	53.75	38.481	59.48	47.576	49.565	53.121	52.613	51.512	50.023	65.8	65.175	43.012
842	44.763	36.233	47.129	55.996	32.539	50.696	48.438	56.94	59.846	53.652	38.317	59.552	47.706	49.809	53.196	52.652	51.411	50.118	65.48	64.878	42.752
842.5	44.7	36.157	47.282	55.872	32.657	50.908	48.454	56.928	59.671	53.621	38.223	59.75	47.654	49.79	53.256	52.742	51.493	49.802	65.062	64.712	43.172
843	44.614	36.183	47.204	55.895	32.572	50.948	48.417	56.993	59.792	53.663	38.194	59.863	47.535	49.633	53.239	52.696	51.309	49.685	65.01	64.828	43.571
843.5	44.54	36.13	47.254	56	32.482	50.986	48.385	56.987	60.057	53.778	38.252	59.813	47.621	49.529	53.26	52.554	51.217	49.228	65.367	65.116	43.47
844	44.477	36.024	47.323	55.88	32.512	50.887	48.358	56.949	60.158	53.856	38.305	59.695	47.697	49.522	53.314	52.451	51.377	48.763	65.591	65.093	42.943
844.5	44.597	36.06	47.231	55.823	32.557	50.798	48.335	56.831	60.173	53.792	38.278	59.836	47.622	49.555	53.329	52.391	51.502	48.647	65.176	65.059	42.997
845	44.607	36.118	47.177	55.877	32.68	50.787	48.253	56.877	60.174	53.798	38.316	60.242	47.628	49.688	53.583	52.336	51.409	48.83	64.764	65.094	43.244
845.5	44.664	36.182	47.187	55.947	32.813	50.813	48.236	57.057	60.174	53.837	38.381	60.363	47.562	49.617	53.647	52.277	51.158	49.09	64.941	65.247	43.341
846	44.786	36.259	47.162	55.9	32.807	50.819	48.224	57.175	60.259	53.92	38.269	60.086	47.407	49.45	53.348	52.362	51.007	49.271	64.949	65.125	43.068
846.5	44.786	36.227	47.143	55.817	32.718	50.975	48.238	57.006	60.21	53.779	38.059	60.113	47.423	49.402	53.242	52.444	51.168	49.274	64.933	64.948	42.836
847	44.742	36.252	47.181	55.763	32.604	51.121	48.422	56.918	60.145	53.581	37.883	60.219	47.423	49.496	53.304	52.418	51.411	49.288	65.06	64.712	43.157
847.5	44.862	36.265	47.153	55.761	32.492	51.176	48.672	56.809	60.095	53.519	37.836	60.051	47.256	49.384	53.106	52.41	51.357	49.115	65.077	64.574	43.408
848	44.933	36.173	43.643	51.603	30.001	47.401	48.722	56.835	60.087	53.711	37.932	59.825	47.12	49.172	52.786	52.436	51.033	48.931	64.656	64.637	43.392
848.5	17.514	14.149	10.49	12.369	7.1811	11.37	18.874	22.228	23.418	20.97	14.714	23.301	18.392	19.167	20.631	20.322	19.806	19.057	25.078	25.243	16.991

## Sheet: Sheet2
" File:	Users\t4chr\Desktop\spectrometer data qu
" TRANS	-> Wave:564.75nm Pix:1050 Val: 31.009 Time:800ms Avg:1 Sm:1 Sg:0 Tc:off SNAP Xt:3 Ch:1 Xtrig
184	0.001
184.5	0.001
185	0.001
185.5	0.001
186	0.001
186.5	0.001
187	0.001
187.5	0.001
188	0.001
188.5	0.001
189	0.001
189.5	60.887
190	-1.6625
190.5	-34.831
191	13.759
191.5	-5.6269
192	-80.886
192.5	-180.71
193	-222.47
193.5	-65.326
194	33.985
194.5	69.013
195	80.167
195.5	65.956
196	47.662
196.5	31.009
197	22.514
197.5	18.638
198	27.117
198.5	33.38
199	30.442
199.5	40.14
200	32.218
200.5	18.917
201	-2.5785
201.5	-82.798
202	-224.26
202.5	-223.73
203	-306.51
203.5	-256.2
204	-122.43
204.5	-89.068
205	-51.699
205.5	-23.124
206	-33.777
206.5	-19.78
207	-6.1259
207.5	11.119
208	47.179
208.5	52.961
209	39.258
209.5	13.294
210	2.2044
210.5	-4.4453
211	-7.7335
211.5	15.648
212	37.868
212.5	60.972
213	70.73
213.5	49.224
214	14.826
214.5	2.448
215	2.2373
215.5	2.1058
216	4.6542
216.5	7.8385
217	15.928
217.5	23.467
218	31.729
218.5	24.784
219	15.845
219.5	9.1356
220	8.4792
220.5	24.287
221	33.042
221.5	39.202
222	38.672
222.5	29.175
223	31.745
223.5	34.519
224	28.756
224.5	15.711
225	9.276
225.5	8.6512
226	11.912
226.5	27.495
227	26.686
227.5	21.515
228	25.92
228.5	26.898
229	34.322
229.5	42.714
230	46.324
230.5	43.712
231	40.984
231.5	40.342
232	39.342
232.5	42.831
233	43.717
233.5	43.012
234	42.901
234.5	42.481
235	42.962
235.5	43.262
236	44.925
236.5	46.455
237	47.854
237.5	49.225
238	49.055
238.5	48.224
239	47.441
239.5	46.834
240	46.589
240.5	47.026
241	47.479
241.5	48.056
242	48.376
242.5	48.421
243	48.45
243.5	47.942
244	47.398
244.5	46.95
245	46.135
245.5	45.611
246	45.517
246.5	45.402
247	45.556
247.5	45.85
248	45.866
248.5	45.605
249	45.318
249.5	44.961
250	44.69
250.5	44.699
251	44.845
251.5	44.984
252	45.054
252.5	44.836
253	44.458
253.5	44.056
254	43.623
254.5	43.373
255	43.252
255.5	43.19
256	43.317
256.5	43.512
257	43.521
257.5	43.382
258	43.135
258.5	42.901
259	42.773
259.5	42.777
260	42.745
260.5	42.604
261	42.526
261.5	42.528
262	42.62
262.5	42.629
263	42.45
263.5	42.187
264	41.951
264.5	41.995
265	42.201
265.5	42.361
266	42.252
266.5	41.956
267	41.74
267.5	41.635
268	41.778
268.5	41.77
269	41.518
269.5	41.292
270	41.18
270.5	41.135
271	41.098
271.5	41.085
272	41.103
272.5	41.205
273	41.322
273.5	41.428
274	41.39
274.5	41.363
275	41.271
275.5	40.976
276	40.855
276.5	40.915
277	41.002
277.5	41.058
278	41.015
278.5	40.869
279	40.859
279.5	40.85
280	40.625
280.5	40.244
281	39.975
281.5	39.96
282	40.216
282.5	40.508
283	40.551
283.5	40.358
284	39.975
284.5	39.845
285	39.832
285.5	39.905
286	39.97
286.5	39.99
287	39.891
287.5	39.731
288	39.65
288.5	39.523
289	39.497
289.5	39.679
290	39.936
290.5	40.306
291	40.52
291.5	40.441
292	40.234
292.5	39.908
293	39.684
293.5	39.597
294	39.482
294.5	39.4
295	39.385
295.5	39.436
296	39.523
296.5	39.561
297	39.427
297.5	39.136
298	38.868
298.5	38.713
299	38.729
299.5	38.91
300	39.093
300.5	39.188
301	39.007
301.5	38.842
302	38.754
302.5	38.536
303	38.559
303.5	38.509
304	38.385
304.5	38.503
305	38.538
305.5	38.314
306	38.037
306.5	37.779
307	37.521
307.5	37.593
308	37.76
308.5	37.916
309	38.103
309.5	38.137
310	38.034
310.5	38.011
311	38.04
311.5	38.067
312	38.099
312.5	37.991
313	37.781
313.5	37.644
314	37.53
314.5	37.457
315	37.351
315.5	37.127
316	36.931
316.5	36.864
317	36.89
317.5	36.829
318	36.762
318.5	36.675
319	36.766
319.5	37.163
320	37.339
320.5	37.491
321	37.343
321.5	36.895
322	36.326
322.5	35.722
323	35.477
323.5	35.461
324	35.494
324.5	35.432
325	35.478
325.5	35.48
326	35.516
326.5	35.487
327	35.195
327.5	34.955
328	34.919
328.5	34.872
329	34.868
329.5	34.996
330	35.04
330.5	35.079
331	35.055
331.5	34.795
332	34.521
332.5	34.402
333	34.329
333.5	34.429
334	34.463
334.5	34.341
335	34.21
335.5	33.984
336	33.756
336.5	33.527
337	33.446
337.5	33.453
338	33.771
338.5	34.022
339	34.142
339.5	34.203
340	34.129
340.5	34.162
341	34.233
341.5	34.13
342	34.021
342.5	33.939
343	33.817
343.5	33.742
344	33.668
344.5	33.618
345	33.551
345.5	33.472
346	33.53
346.5	33.459
347	33.637
347.5	33.711
348	33.796
348.5	33.911
349	33.876
349.5	33.878
350	33.808
350.5	33.818
351	33.618
351.5	33.319
352	33.166
352.5	33.089
353	33.274
353.5	33.741
354	34.09
354.5	34.379
355	34.408
355.5	34.265
356	34.065
356.5	33.831
357	33.894
357.5	33.886
358	33.895
358.5	33.821
359	33.538
359.5	33.444
360	33.348
360.5	33.353
361	33.459
361.5	33.678
362	33.988
362.5	33.866
363	33.596
363.5	33.36
364	33.167
364.5	33.475
365	33.825
365.5	34.059
366	34.084
366.5	33.873
367	33.61
367.5	33.428
368	33.494
368.5	33.61
369	33.717
369.5	33.855
370	33.72
370.5	33.532
371	33.375
371.5	33.455
372	33.728
372.5	33.859
373	33.904
373.5	33.528
374	33.13
374.5	32.796
375	32.604
375.5	32.763
376	32.836
376.5	32.61
377	32.359
377.5	31.863
378	31.571
378.5	31.798
379	32.124
379.5	32.491
380	32.633
380.5	32.556
381	32.207
381.5	31.874
382	31.847
382.5	31.995
383	32.871
383.5	33.406
384	33.293
384.5	33.119
385	32.897
385.5	33.199
386	33.315
386.5	33.096
387	32.899
387.5	32.753
388	32.678
388.5	32.58
389	32.213
389.5	31.857
390	31.712
390.5	31.801
391	31.344
391.5	31.39
392	31.45
392.5	31.51
393	32.427
393.5	32.677
394	32.966
394.5	32.75
395	32.088
395.5	31.947
396	31.954
396.5	32.492
397	32.815
397.5	32.866
398	32.406
398.5	31.629
399	31.002
399.5	30.707
400	30.644
400.5	30.814
401	30.353
401.5	29.834
402	29.976
402.5	30.562
403	31.375
403.5	31.742
404	31.976
404.5	31.853
405	31.415
405.5	30.568
406	29.894
406.5	29.457
407	29.975
407.5	30.57
408	30.637
408.5	30.662
409	30.242
409.5	30.306
410	30.479
410.5	30.476
411	30.748
411.5	31.031
412	31.138
412.5	31.127
413	30.857
413.5	30.553
414	30.308
414.5	29.82
415	29.578
415.5	29.89
416	30.452
416.5	30.793
417	30.678
417.5	30.821
418	30.959
418.5	30.772
419	30.334
419.5	29.136
420	28.172
420.5	28.127
421	28.782
421.5	29.878
422	30.487
422.5	30.198
423	29.893
423.5	30.113
424	30.341
424.5	30.22
425	29.801
425.5	29.4
426	29.248
426.5	29.54
427	29.524
427.5	29.283
428	29.27
428.5	29.419
429	29.832
429.5	30.058
430	29.863
430.5	29.698
431	29.906
431.5	30.131
432	29.996
432.5	29.721
433	29.339
433.5	29.291
434	29.461
434.5	29.501
435	29.638
435.5	29.615
436	29.807
436.5	29.788
437	30.09
437.5	30.286
438	30.127
438.5	29.874
439	29.223
439.5	28.713
440	28.675
440.5	29.085
441	29.605
441.5	29.998
442	30.166
442.5	30.09
443	29.963
443.5	29.94
444	29.57
444.5	29.545
445	29.663
445.5	29.628
446	29.599
446.5	29.388
447	29.081
447.5	29.124
448	29.277
448.5	29.492
449	29.535
449.5	29.593
450	29.407
450.5	29.401
451	29.368
451.5	29.609
452	29.906
452.5	30.368
453	30.622
453.5	30.556
454	30.263
454.5	29.709
455	29.138
455.5	28.812
456	28.677
456.5	28.889
457	29.307
457.5	29.651
458	29.795
458.5	29.716
459	29.461
459.5	29.118
460	29.058
460.5	29.103
461	29.522
461.5	29.87
462	30.106
462.5	29.976
463	29.507
463.5	29.133
464	28.785
464.5	28.9
465	29.06
465.5	29.106
466	29.247
466.5	29.358
467	29.474
467.5	29.65
468	29.529
468.5	29.528
469	29.59
469.5	29.608
470	29.603
470.5	29.513
471	29.302
471.5	29.067
472	28.901
472.5	28.723
473	28.719
473.5	28.786
474	29.103
474.5	29.441
475	29.515
475.5	29.345
476	28.947
476.5	28.947
477	29.188
477.5	29.322
478	29.356
478.5	29.114
479	29.032
479.5	28.976
480	28.866
480.5	28.82
481	28.704
481.5	28.723
482	28.664
482.5	28.499
483	28.355
483.5	28.155
484	28.018
484.5	28.149
485	28.456
485.5	29.017
486	29.326
486.5	29.26
487	29.082
487.5	28.931
488	29.095
488.5	29.203
489	29.407
489.5	29.424
490	29.212
490.5	29.031
491	28.739
491.5	28.674
492	28.738
492.5	28.824
493	29.018
493.5	29.147
494	29.152
494.5	29.093
495	28.984
495.5	28.864
496	28.769
496.5	28.839
497	29.033
497.5	29.302
498	29.306
498.5	29.062
499	28.78
499.5	28.458
500	28.492
500.5	28.648
501	28.743
501.5	28.806
502	28.702
502.5	28.8
503	29.015
503.5	29.28
504	29.487
504.5	29.521
505	29.522
505.5	29.391
506	29.212
506.5	29.108
507	29.168
507.5	29.139
508	29.039
508.5	28.89
509	28.89
509.5	29.041
510	29.17
510.5	29.061
511	29.029
511.5	29.068
512	29.14
512.5	29.339
513	29.328
513.5	29.473
514	29.445
514.5	29.399
515	29.361
515.5	29.201
516	29.318
516.5	29.334
517	29.533
517.5	29.707
518	29.925
518.5	30.081
519	30.004
519.5	29.826
520	29.771
520.5	29.871
521	30.034
521.5	30.229
522	30.322
522.5	30.356
523	30.242
523.5	30.008
524	30.027
524.5	30.083
525	30.337
525.5	30.368
526	30.288
526.5	30.144
527	30.106
527.5	30.364
528	30.744
528.5	30.985
529	30.941
529.5	30.979
530	31.241
530.5	31.671
531	31.895
531.5	31.703
532	31.365
532.5	31.028
533	30.954
533.5	30.92
534	30.835
534.5	30.542
535	30.47
535.5	30.605
536	31.002
536.5	31.192
537	31.318
537.5	31.436
538	31.608
538.5	31.607
539	31.263
539.5	30.98
540	30.949
540.5	31.044
541	31.129
541.5	31.285
542	31.567
542.5	31.774
543	31.814
543.5	31.528
544	31.321
544.5	31.179
545	31.105
545.5	31.099
546	31.081
546.5	31.118
547	31.161
547.5	31.242
548	31.375
548.5	31.466
549	31.478
549.5	31.421
550	31.433
550.5	31.439
551	31.523
551.5	31.601
552	31.621
552.5	31.532
553	31.406
553.5	31.326
554	31.457
554.5	31.592
555	31.754
555.5	31.723
556	31.657
556.5	31.554
557	31.533
557.5	31.445
558	31.356
558.5	31.212
559	31.181
559.5	31.251
560	31.27
560.5	31.365
561	31.346
561.5	31.265
562	31.125
562.5	31.002
563	30.856
563.5	30.907
564	30.929
564.5	30.941
565	30.97
565.5	30.761
566	30.654
566.5	30.561
567	30.473
567.5	30.456
568	30.477
568.5	30.573
569	30.589
569.5	30.475
570	30.464
570.5	30.449
571	30.427
571.5	30.421
572	30.278
572.5	30.217
573	29.928
573.5	29.812
574	29.949
574.5	30.229
575	30.465
575.5	30.447
576	30.359
576.5	30.225
577	30.21
577.5	30.15
578	30.036
578.5	29.995
579	29.912
579.5	29.882
580	29.883
580.5	29.932
581	30.101
581.5	30.075
582	30.066
582.5	29.918
583	29.84
583.5	29.84
584	29.886
584.5	29.997
585	29.887
585.5	29.69
586	29.502
586.5	29.504
587	29.496
587.5	29.297
588	29.17
588.5	29.196
589	29.28
589.5	29.354
590	29.26
590.5	29.177
591	28.993
591.5	28.918
592	29.138
592.5	29.401
593	29.751
593.5	29.815
594	29.894
594.5	29.602
595	29.482
595.5	29.454
596	29.486
596.5	29.43
597	29.31
597.5	29.374
598	29.391
598.5	29.419
599	29.44
599.5	29.528
600	29.496
600.5	29.26
601	28.973
601.5	28.846
602	29.025
602.5	29.333
603	29.226
603.5	28.916
604	28.62
604.5	28.661
605	28.813
605.5	28.828
606	28.86
606.5	28.966
607	29.216
607.5	29.393
608	29.467
608.5	29.2
609	28.969
609.5	28.696
610	28.842
610.5	29.167
611	29.438
611.5	29.378
612	29.15
612.5	29.093
613	29.13
613.5	28.991
614	29.062
614.5	29.262
615	29.422
615.5	29.26
616	28.949
616.5	28.929
617	28.886
617.5	28.963
618	29.03
618.5	29.283
619	29.401
619.5	29.406
620	29.213
620.5	28.919
621	28.748
621.5	28.769
622	28.909
622.5	28.981
623	29.106
623.5	29.105
624	28.919
624.5	28.75
625	28.702
625.5	28.797
626	28.779
626.5	28.87
627	29.071
627.5	29.288
628	29.175
628.5	28.902
629	28.609
629.5	28.47
630	28.455
630.5	28.598
631	28.727
631.5	28.968
632	29.02
632.5	29.031
633	28.816
633.5	28.811
634	28.746
634.5	28.609
635	28.333
635.5	28.239
636	28.438
636.5	28.741
637	29.039
637.5	29.28
638	29.184
638.5	28.896
639	28.539
639.5	28.52
640	28.57
640.5	28.721
641	28.762
641.5	28.691
642	28.468
642.5	28.285
643	28.202
643.5	28.1
644	27.986
644.5	27.935
645	28.012
645.5	28.038
646	28.154
646.5	28.171
647	28.156
647.5	28.239
648	28.35
648.5	28.543
649	28.587
649.5	28.684
650	28.681
650.5	28.504
651	28.211
651.5	28.079
652	28.207
652.5	28.481
653	28.411
653.5	28.141
654	27.989
654.5	28.104
655	28.386
655.5	28.453
656	28.417
656.5	28.341
657	28.263
657.5	28.205
658	28.062
658.5	27.94
659	27.986
659.5	28.052
660	28.254
660.5	28.376
661	28.442
661.5	28.25
662	28.049
662.5	28.062
663	28.396
663.5	28.706
664	28.791
664.5	28.686
665	28.539
665.5	28.448
666	28.129
666.5	27.941
667	28.063
667.5	28.575
668	28.862
668.5	28.605
669	28.065
669.5	27.972
670	28.342
670.5	28.815
671	28.871
671.5	28.599
672	28.284
672.5	28.306
673	28.537
673.5	28.918
674	29.018
674.5	29.057
675	28.818
675.5	28.545
676	28.284
676.5	28.529
677	28.658
677.5	28.719
678	28.553
678.5	28.72
679	28.94
679.5	29.009
680	28.784
680.5	28.581
681	28.559
681.5	28.67
682	28.903
682.5	29.168
683	29.227
683.5	29.065
684	28.884
684.5	28.937
685	29.12
685.5	29.092
686	29.011
686.5	28.839
687	29.008
687.5	29.227
688	29.397
688.5	29.413
689	29.301
689.5	29.243
690	29.269
690.5	29.327
691	29.304
691.5	29.324
692	29.483
692.5	29.664
693	29.629
693.5	29.701
694	29.972
694.5	30.23
695	30.249
695.5	30.297
696	30.382
696.5	30.655
697	30.804
697.5	31.073
698	31.19
698.5	31.464
699	31.883
699.5	32.305
700	32.28
700.5	32.054
701	31.83
701.5	31.979
702	32.2
702.5	32.547
703	32.9
703.5	33.319
704	33.511
704.5	33.607
705	33.637
705.5	33.726
706	33.703
706.5	33.877
707	34.295
707.5	34.678
708	34.742
708.5	34.45
709	34.396
709.5	34.608
710	35.059
710.5	35.32
711	35.663
711.5	36.174
712	36.661
712.5	36.715
713	36.78
713.5	36.761
714	37.11
714.5	37.382
715	37.578
715.5	37.62
716	37.53
716.5	37.696
717	38.063
717.5	38.564
718	38.776
718.5	38.625
719	38.5
719.5	38.571
720	38.773
720.5	38.961
721	38.957
721.5	39.196
722	39.58
722.5	39.921
723	40.137
723.5	40.301
724	40.464
724.5	40.47
725	40.525
725.5	40.754
726	40.849
726.5	40.861
727	40.774
727.5	40.717
728	40.343
728.5	40.235
729	40.422
729.5	41.047
730	41.297
730.5	41.675
731	41.819
731.5	42.076
732	42.101
732.5	42.118
733	42.085
733.5	42.155
734	42.419
734.5	42.649
735	42.721
735.5	42.457
736	42.349
736.5	42.272
737	42.243
737.5	42.259
738	42.416
738.5	42.631
739	42.601
739.5	42.63
740	42.721
740.5	42.657
741	42.73
741.5	42.748
742	42.705
742.5	42.631
743	42.706
743.5	42.82
744	42.829
744.5	43.248
745	43.539
745.5	43.544
746	43.11
746.5	42.982
747	42.975
747.5	43.169
748	43.205
748.5	43.224
749	43.219
749.5	43.329
750	43.761
750.5	43.902
751	43.984
751.5	43.949
752	44.101
752.5	44.132
753	43.973
753.5	43.562
754	43.341
754.5	43.122
755	43.208
755.5	43.212
756	43.511
756.5	43.421
757	43.371
757.5	43.158
758	42.938
758.5	42.69
759	42.73
759.5	42.873
760	43.158
760.5	43.433
761	43.659
761.5	43.747
762	43.761
762.5	43.617
763	43.661
763.5	43.728
764	43.578
764.5	43.374
765	43.569
765.5	43.918
766	44.093
766.5	44.105
767	43.946
767.5	43.685
768	43.439
768.5	43.433
769	43.38
769.5	43.359
770	43.511
770.5	43.491
771	43.427
771.5	43.51
772	43.892
772.5	43.854
773	43.748
773.5	43.648
774	43.757
774.5	43.716
775	43.536
775.5	43.268
776	43.004
776.5	42.86
777	43.28
777.5	43.609
778	43.875
778.5	43.759
779	43.57
779.5	43.28
780	43.189
780.5	43.178
781	43.279
781.5	43.289
782	43.168
782.5	43.046
783	43.145
783.5	43.185
784	43.079
784.5	43.154
785	43.338
785.5	43.23
786	43.206
786.5	43.169
787	43.239
787.5	43.214
788	43.376
788.5	43.324
789	43.292
789.5	43.373
790	43.534
790.5	43.653
791	43.55
791.5	43.428
792	43.196
792.5	43.068
793	43.308
793.5	43.743
794	43.721
794.5	43.511
795	43.352
795.5	43.189
796	42.911
796.5	43.05
797	43.316
797.5	43.529
798	43.367
798.5	43.097
799	43.005
799.5	43.168
800	43.249
800.5	43.128
801	43.332
801.5	43.351
802	43.178
802.5	42.896
803	43.036
803.5	43.329
804	43.478
804.5	43.179
805	42.936
805.5	42.981
806	42.958
806.5	42.756
807	43.078
807.5	43.32
808	43.571
808.5	43.669
809	43.962
809.5	43.707
810	43.408
810.5	43.474
811	43.669
811.5	43.38
812	43.273
812.5	43.026
813	42.747
813.5	42.622
814	42.919
814.5	43.13
815	43.404
815.5	43.77
816	43.859
816.5	43.686
817	43.45
817.5	43.465
818	43.354
818.5	43.231
819	43.319
819.5	43.294
820	42.747
820.5	42.454
821	42.725
821.5	43.138
822	43.302
822.5	43.049
823	42.605
823.5	42.479
824	42.81
824.5	42.891
825	42.587
825.5	42.478
826	42.612
826.5	42.711
827	42.967
827.5	43.187
828	43.232
828.5	43.226
829	43.424
829.5	43.446
830	43.359
830.5	43.125
831	42.903
831.5	42.698
832	42.871
832.5	42.878
833	42.649
833.5	42.563
834	43.01
834.5	42.931
835	42.843
835.5	42.865
836	43.056
836.5	43.472
837	43.801
837.5	43.646
838	43.192
838.5	42.955
839	43.07
839.5	43.304
840	43.222
840.5	43.311
841	43.175
841.5	43.012
842	42.752
842.5	43.172
843	43.571
843.5	43.47
844	42.943
844.5	42.997
845	43.244
845.5	43.341
846	43.068
846.5	42.836
847	43.157
847.5	43.408
848	43.392
848.5	16.991
